# Supplementary material for: Proteome- and metabolome-level changes during early stages of clubroot infection in Brassica napus canola
Source: Royal Society of Chemistry journal article supplement (doi:10.1039/d3mo00210a), 2024-01-22
Supplement: d3mo00210a2.xlsx [file d3mo00210a2.xlsx]

## Sheet: (A) Resistant 2516
Table S1 A. Diffferentially abundant proteins in resistant genotype. Res = clubroot resistant genotype, T = pathogen inoculated, C= uninoculated. the numbers 1, 4, and 7 indicate days post pathogen inoculation.
Proteins	Log2 Fold Change Res1T.C	Qvalue Res1T.C	Log2 Fold Change Res4T.C	Qvalue Res4T.C	Log2 Fold Change Res7T.C	Qvalue Res7T.C	GO	KEGG	Swissprot	Pfam
BnaA01T0003400WE	0.448753	0.0211572	0.243614	0.0253605	1.01505	0.00808213	GO:0016021	tetraspanin-19; K17345 tetraspanin-5 (A)	Tetraspanin-20 OS=Arabidopsis thaliana GN=TOM2AH1 PE=2 SV=1	Tetraspanin family
BnaA01T0004000WE	-0.24226	0.0478147	0.174447	0.278943	0.813409	0.0386884	GO:0003774	myosin-14; K10357 myosin V (A)	Myosin-14 OS=Arabidopsis thaliana GN=XI-H PE=3 SV=1	Myosin N-terminal SH3-like domain
BnaA01T0006300WE	-0.0427602	0.240038	0.262976	0.189897	0.636445	0.00820947	--	uncharacterized protein At4g28440-like; K07466 replication factor A1 (A)	Uncharacterized protein At4g28440 OS=Arabidopsis thaliana GN=At4g28440 PE=1 SV=1	--
BnaA01T0011700WE	2.02291	0.0972121	-1.58587	0.0256583	-2.21878	0.00285174	GO:0003735	60S ribosomal protein L32-1; K02912 large subunit ribosomal protein L32e (A)	60S ribosomal protein L32-1 OS=Arabidopsis thaliana GN=RPL32A PE=2 SV=2	Ribosomal protein L32
BnaA01T0016900WE	-1.16413	0.0767886	-0.347941	0.267402	1.11543	0.0463913	--	hypothetical protein; K02984 small subunit ribosomal protein S3Ae (A)	Leucine-rich repeat extensin-like protein 5 OS=Arabidopsis thaliana GN=LRX5 PE=2 SV=2	Leucine rich repeat N-terminal domain
BnaA01T0017300WE	-0.284128	0.0082773	-0.0488585	0.362988	-0.594906	0.0123511	GO:0003735	60S ribosomal protein L11-2; K02868 large subunit ribosomal protein L11e (A)	60S ribosomal protein L11-2 OS=Arabidopsis thaliana GN=RPL11B PE=2 SV=2	Ribosomal protein L5
BnaA01T0028300WE	-0.72159	0.0858316	-0.692032	0.0591115	1.79198	0.0118159	GO:0046658	--	Plasma membrane-associated cation-binding protein 1 OS=Arabidopsis thaliana GN=PCAP1 PE=1 SV=1	DREPP plasma membrane polypeptide
BnaA01T0032600WE	-0.0452644	0.0105735	-0.376006	0.307143	-0.876362	0.0241373	GO:0009055	Cell division control protein 4; K03361 F-box and WD-40 domain protein CDC4 (A)	Adrenodoxin-like protein 2, mitochondrial OS=Arabidopsis thaliana GN=MFDX2 PE=2 SV=1	2Fe-2S iron-sulfur cluster binding domain
BnaA01T0035400WE	-0.734471	0.209166	0.338046	0.183183	1.92491	0.0109089	GO:0005198	vapa; VAMP (vesicle-associated membrane protein)-associated protein A, 33kDa; K06096 vesicle-associated membrane protein-associated protein A (A)	Vesicle-associated protein 4-2 OS=Arabidopsis thaliana GN=PVA42 PE=1 SV=1	MSP (Major sperm protein) domain
BnaA01T0039700WE	-0.151939	0.122646	0.366579	0.0568083	1.27646	0.00356441	GO:0004601	peroxidase 42; K00430 peroxidase [EC:1.11.1.7] (A)	Peroxidase 42 OS=Arabidopsis thaliana GN=PER42 PE=1 SV=2	Peroxidase
BnaA01T0040100WE	0.195841	0.116727	-0.486606	0.118744	-1.89941	0.0134461	GO:0003824	5'-adenylylsulfate reductase 3, chloroplastic-like; K05907 adenylyl-sulfate reductase (glutathione) [EC:1.8.4.9] (A)	5'-adenylylsulfate reductase 3, chloroplastic OS=Arabidopsis thaliana GN=APR3 PE=2 SV=2	Thioredoxin
BnaA01T0044600WE	0.0297506	0.0365547	-0.223802	0.376961	0.559173	0.0314244	GO:0005515	FAM10 family protein At4g22670-like; K09560 suppressor of tumorigenicity protein 13 (A)	FAM10 family protein At4g22670 OS=Arabidopsis thaliana GN=At4g22670 PE=1 SV=1	TPR repeat
BnaA01T0048600WE	0.480948	0.0524839	0.587844	0.0526421	-0.806678	0.00368266	GO:0004357	glutamate--cysteine ligase, chloroplastic; K01919 glutamate--cysteine ligase [EC:6.3.2.2] (A)	Glutamate--cysteine ligase, chloroplastic OS=Brassica juncea GN=GSH1 PE=1 SV=1	Glutamate-cysteine ligase family 2(GCS2)
BnaA01T0049800WE	-0.281887	0.0198404	0.479235	0.0431022	1.2115	0.023411	--	dead Box protein Dhh1p; K12614 ATP-dependent RNA helicase DDX6/DHH1 [EC:3.6.4.13] (A)	Protein lifeguard 1 OS=Bos taurus GN=GRINA PE=2 SV=1	PLAC8 family
BnaA01T0051300WE	-0.0815759	0.0700236	0.506974	0.0918378	-0.541028	0.01977	GO:0003676	--	Uncharacterized protein At2g34160 OS=Arabidopsis thaliana GN=At2g34160 PE=1 SV=1	Alba
BnaA01T0053300WE	-1.25335	0.121238	0.690726	0.0803273	1.25398	0.0405646	--	--	Protein trichome birefringence-like 38 OS=Arabidopsis thaliana GN=TBL38 PE=2 SV=1	PMR5 N terminal Domain
BnaA01T0054400WE	-0.461237	0.0142485	0.37392	0.0531307	0.87719	0.0076628	--	hypothetical protein; K00861 riboflavin kinase [EC:2.7.1.26] (A)	Reticulon-like protein B1 OS=Arabidopsis thaliana GN=RTNLB1 PE=1 SV=1	Reticulon
BnaA01T0055000WE	-0.29949	0.124112	0.57209	0.00157403	0.859514	0.00386222	--	hypothetical protein; K19027 zinc finger FYVE domain-containing protein 26 (A)	Dirigent protein 6 OS=Arabidopsis thaliana GN=DIR6 PE=1 SV=1	Dirigent-like protein
BnaA01T0058700WE	0.664289	0.185848	0.719051	0.33364	0.818442	0.0121777	GO:0004672	serine/threonine-protein kinase BLUS1-like; K08835 serine/threonine-protein kinase OSR1/STK39 [EC:2.7.11.1] (A)	Serine/threonine-protein kinase fray2 OS=Dictyostelium discoideum GN=fray2 PE=3 SV=1	Protein kinase domain
BnaA01T0060600WE	-0.563006	0.0163097	0.524142	0.00770904	0.800815	0.0088585	GO:0003676	CSTF3; cleavage stimulation factor, 3' pre-RNA, subunit 3; K14408 cleavage stimulation factor subunit 3 (A)	Squamous cell carcinoma antigen recognized by T-cells 3 OS=Homo sapiens GN=SART3 PE=1 SV=1	Lsm interaction motif
BnaA01T0067700WE	-0.521674	0.32001	0.0414403	0.184344	1.12379	0.0435339	GO:0008113	peptide methionine sulfoxide reductase; K07304 peptide-methionine (S)-S-oxide reductase [EC:1.8.4.11] (A)	Peptide methionine sulfoxide reductase OS=Brassica napus GN=PMSR PE=2 SV=1	Peptide methionine sulfoxide reductase
BnaA01T0069000WE	-0.106061	0.153384	0.425741	0.0263046	1.27117	0.0171275	GO:0005507	monocopper oxidase-like protein SKS1; K19791 iron transport multicopper oxidase (A)	Monocopper oxidase-like protein SKS1 OS=Arabidopsis thaliana GN=SKS1 PE=1 SV=1	Multicopper oxidase
BnaA01T0080500WE	0.262068	0.0653541	-0.380765	0.0912429	0.838292	0.00412726	GO:0005509	calcineurin B-like protein 3; K06268 serine/threonine-protein phosphatase 2B regulatory subunit (A)	Calcineurin B-like protein 3 OS=Arabidopsis thaliana GN=CBL3 PE=1 SV=2	EF-hand domain pair
BnaA01T0083000WE	0.148336	0.0192152	-0.595666	0.0322319	-0.511817	0.0434142	GO:0005515	small ubiquitin-related modifier 1-like; K12160 small ubiquitin-related modifier (A)	Small ubiquitin-related modifier 1 OS=Arabidopsis thaliana GN=SUMO1 PE=1 SV=2	Ubiquitin-2 like Rad60 SUMO-like
BnaA01T0084800WE	0.0254929	0.357822	0.0670393	0.239758	-0.509225	0.00742762	GO:0003735	60S ribosomal protein L14-2; K02875 large subunit ribosomal protein L14e (A)	60S ribosomal protein L14-2 OS=Arabidopsis thaliana GN=RPL14B PE=2 SV=1	Ribosomal protein L14
BnaA01T0087000WE	-0.969169	0.013671	0.127371	0.359789	0.672711	0.00402548	GO:0006950	--	--	Universal stress protein family
BnaA01T0088200WE	-1.63957	0.00216491	-1.56974	0.0891292	-4.61907	0.0217118	--	asns; asparagine synthetase; K01953 asparagine synthase (glutamine-hydrolysing) [EC:6.3.5.4] (A)	Stem-specific protein TSJT1 OS=Nicotiana tabacum GN=TSJT1 PE=2 SV=1	Aluminium induced protein
BnaA01T0088900WE	0.502387	0.0273053	-0.128003	0.301547	1.66569	0.0264163	GO:0005507	Muc2, 2010015E03Rik, MCM, wnn; mucin 2; K10955 intestinal mucin-2 (A)	Early nodulin-like protein 2 OS=Arabidopsis thaliana GN=At4g27520 PE=1 SV=1	Plastocyanin-like domain
BnaA01T0094200WE	0.726473	0.0764993	-0.930711	0.0197326	2.25416	0.0284668	GO:0004129	cytochrome c oxidase subunit 6b-3; K02267 cytochrome c oxidase subunit 6b (A)	Cytochrome c oxidase subunit 6b-2 OS=Arabidopsis thaliana GN=COX6B-2 PE=2 SV=1	Cytochrome oxidase c subunit VIb
BnaA01T0095800WE	0.122339	0.0272364	0.965547	0.0219804	2.532	0.000892524	GO:0005576	uncharacterized LOC104881844; K13754 solute carrier family 24 (sodium/potassium/calcium exchanger), member 6 (A)	Expansin-B3 OS=Arabidopsis thaliana GN=EXPB3 PE=2 SV=2	Lytic transglycolase
BnaA01T0098000WE	0.0740169	0.314913	0.226086	0.0570418	0.533187	0.0446165	GO:0005215	probable aquaporin TIP2-2; K09873 aquaporin TIP (A)	Probable aquaporin TIP2-2 OS=Arabidopsis thaliana GN=TIP2-2 PE=1 SV=2	Major intrinsic protein
BnaA01T0108400WE	0.0289751	0.377065	0.21833	0.262229	-1.53274	0.00503526	GO:0004553	hypothetical protein; K19891 glucan endo-1,3-beta-glucosidase 1/2/3 [EC:3.2.1.39] (A)	Glucan endo-1,3-beta-glucosidase, basic vacuolar isoform OS=Hevea brasiliensis GN=HGN1 PE=1 SV=2	Glycosyl hydrolases family 17
BnaA01T0108800WE	0.380554	0.00533869	0.280624	0.246458	1.43556	0.00585374	GO:0006508	cysteine proteinase 15A-like; K01373 cathepsin F [EC:3.4.22.41] (A)	Cysteine proteinase RD19a OS=Arabidopsis thaliana GN=RD19A PE=2 SV=1	Cathepsin propeptide inhibitor domain (I29)
BnaA01T0110600WE	-0.112779	0.343541	0.579784	0.00535783	0.85911	0.000331756	GO:0005524	L-arabinokinase; K12446 L-arabinokinase [EC:2.7.1.46] (A)	L-arabinokinase OS=Arabidopsis thaliana GN=ARA1 PE=1 SV=1	Galactokinase galactose-binding signature
BnaA01T0115100WE	-0.126885	0.261807	0.26739	0.257335	-0.720515	0.0273908	GO:0005515	WD repeat-containing protein 3-like; K14556 U3 small nucleolar RNA-associated protein 12 (A)	WD repeat-containing protein 3 OS=Mus musculus GN=Wdr3 PE=2 SV=1	Dip2/Utp12 Family
BnaA01T0120300WE	-0.0199557	0.351074	-0.230473	0.0627804	-0.77885	0.00353783	--	cysteine synthase; K01738 cysteine synthase A [EC:2.5.1.47] (A)	Cysteine synthase OS=Brassica juncea PE=2 SV=1	Pyridoxal-phosphate dependent enzyme
BnaA01T0122900WE	-0.180828	0.0880137	-0.573875	0.0700477	-0.917169	0.00201952	GO:0004781	ATP-sulfurylase 3, chloroplastic; K13811 3'-phosphoadenosine 5'-phosphosulfate synthase [EC:2.7.7.4 2.7.1.25] (A)	ATP-sulfurylase 3, chloroplastic OS=Arabidopsis thaliana GN=APS3 PE=1 SV=1	PUA-like domain
BnaA01T0124800WE	-0.412426	0.0454372	-0.0437811	0.223821	-0.737215	0.00310913	GO:0004659	chlorophyll synthase, chloroplastic; K04040 chlorophyll synthase [EC:2.5.1.62] (A)	Chlorophyll synthase, chloroplastic OS=Arabidopsis thaliana GN=CHLG PE=2 SV=1	Metallopeptidase family M24
BnaA01T0127500WE	0.371464	0.0237304	0.248985	0.0288996	-0.775443	0.0031968	GO:0003824	GDP-mannose 4,6 dehydratase 2-like; K01711 GDPmannose 4,6-dehydratase [EC:4.2.1.47] (A)	GDP-mannose 4,6 dehydratase 2 OS=Arabidopsis thaliana GN=MUR1 PE=1 SV=3	NAD dependent epimerase/dehydratase family
BnaA01T0142700WE	0.0405073	0.348295	0.037823	0.278246	-0.556635	0.0140086	GO:0000287	acetolactate synthase 3, chloroplastic; K01652 acetolactate synthase I/II/III large subunit [EC:2.2.1.6] (A)	Acetolactate synthase 3, chloroplastic OS=Brassica napus PE=3 SV=1	Thiamine pyrophosphate enzyme, central domain
BnaA01T0150300WE	-0.224182	0.129152	0.36091	0.00796371	0.518697	0.0226772	GO:0003779	villin-4-like; K05768 gelsolin (A)	Villin-4 OS=Arabidopsis thaliana GN=VLN4 PE=1 SV=1	Villin headpiece domain
BnaA01T0154400WE	-0.137907	0.24393	0.142778	0.136528	0.783659	0.0103607	GO:0003824	ectonucleotide pyrophosphatase/phosphodiesterase family member 1; K01513 ectonucleotide pyrophosphatase/phosphodiesterase family member 1/3 [EC:3.1.4.1 3.6.1.9] (A)	Thioredoxin-like 2-2, chloroplastic OS=Arabidopsis thaliana GN=At4g29670 PE=2 SV=2	Thioredoxin
BnaA01T0155900WE	0.757697	0.00492532	0.59036	0.0138344	-0.670638	0.00799112	GO:0003735	60S ribosomal protein L28-2; K02903 large subunit ribosomal protein L28e (A)	60S ribosomal protein L28-2 OS=Arabidopsis thaliana GN=RPL28C PE=2 SV=1	Ribosomal L28e protein family
BnaA01T0156500WE	-1.42107	0.0318806	-1.1268	0.0348158	-1.07207	0.00404979	GO:0003779	profilin-1; K05759 profilin (A)	Profilin-1 OS=Arabidopsis thaliana GN=PRO1 PE=1 SV=1	Profilin
BnaA01T0157200WE	-0.605172	0.0296761	0.664573	0.00959104	3.02794	0.00432642	GO:0003840	gamma-glutamyltranspeptidase 3-like; K18592 gamma-glutamyltranspeptidase / glutathione hydrolase / leukotriene-C4 hydrolase [EC:2.3.2.2 3.4.19.13 3.4.19.14] (A)	Gamma-glutamyltranspeptidase 3 OS=Arabidopsis thaliana GN=GGT3 PE=2 SV=1	Gamma-glutamyltranspeptidase
BnaA01T0175700WE	0.114184	0.113899	-0.3796	0.0424481	-0.542137	0.014935	GO:0005509	calreticulin-1; K08057 calreticulin (A)	Calreticulin-1 OS=Arabidopsis thaliana GN=CRT1 PE=1 SV=1	Calreticulin family
BnaA01T0185000WE	0.343972	0.0309819	-0.173097	0.325052	0.515107	0.00923246	GO:0003924	dynamin-2B; K01528 dynamin GTPase [EC:3.6.5.5] (A)	Dynamin-2B OS=Arabidopsis thaliana GN=DRP2B PE=1 SV=2	Dynamin GTPase effector domain
BnaA01T0186200WE	0.380544	0.349467	-0.587758	0.155894	0.761222	0.0131866	GO:0000166	phospholipid-transporting ATPase 3; K14802 phospholipid-transporting ATPase [EC:3.6.3.1] (A)	Phospholipid-transporting ATPase 3 OS=Arabidopsis thaliana GN=ALA3 PE=1 SV=2	haloacid dehalogenase-like hydrolase
BnaA01T0194700WE	-0.136893	0.100444	0.0888608	0.374843	0.562093	0.00148623	GO:0016787	cleavage and polyadenylation specificity factor subunit 3-I; K14403 cleavage and polyadenylation specificity factor subunit 3 [EC:3.1.27.-] (A)	Cleavage and polyadenylation specificity factor subunit 3-I OS=Arabidopsis thaliana GN=CPSF73-I PE=1 SV=1	Zn-dependent metallo-hydrolase RNA specificity domain
BnaA01T0200800WE	-0.120493	0.232857	-0.355356	0.0455114	-0.754124	0.00123745	--	dnaJ homolog subfamily C member 25 homolog; K19371 DnaJ homolog subfamily C member 25 (A)	Chaperone protein dnaJ 50 OS=Arabidopsis thaliana GN=C50 PE=2 SV=1	DnaJ domain
BnaA01T0201200WE	0.0139321	0.277415	-0.403699	0.137848	-1.21906	0.0374138	GO:0004553	beta-glucosidase 46-like; K05350 beta-glucosidase [EC:3.2.1.21] (A)	Beta-glucosidase 46 OS=Arabidopsis thaliana GN=BGLU46 PE=1 SV=2	Glycosyl hydrolase family 1
BnaA01T0201900WE	-0.398878	0.167792	0.204542	0.0420888	-1.01515	0.00512168	--	pentatricopeptide repeat-containing protein At1g52620-like; K17964 leucine-rich PPR motif-containing protein, mitochondrial (A)	Pentatricopeptide repeat-containing protein At1g61870, mitochondrial OS=Arabidopsis thaliana GN=PPR336 PE=2 SV=2	PPR repeat
BnaA01T0206300WE	0.0176398	0.206581	0.200068	0.199782	0.731757	0.0103574	GO:0004672	probable receptor protein kinase TMK1; K17285 selenium-binding protein 1 (A)	Receptor-like kinase TMK4 OS=Arabidopsis thaliana GN=TMK4 PE=1 SV=1	Leucine rich repeat N-terminal domain
BnaA01T0207900WE	-0.278384	0.0564489	-0.826444	0.00308763	1.19129	0.0102613	GO:0016787	hypothetical protein; K01061 carboxymethylenebutenolidase [EC:3.1.1.45] (A)	Endo-1,3;1,4-beta-D-glucanase OS=Zea mays PE=1 SV=1	Dienelactone hydrolase family
BnaA01T0214900WE	-0.294294	0.219148	-0.0942498	0.217647	-0.895214	0.00582872	GO:0006810	hypothetical protein; K14825 protein ERP2 (A)	Transmembrane emp24 domain-containing protein p24beta3 OS=Arabidopsis thaliana GN=At3g22845 PE=2 SV=1	emp24/gp25L/p24 family/GOLD
BnaA01T0216700WE	-0.836619	0.206013	-0.305568	0.0659452	1.18058	0.032075	--	--	Protein YLS3 OS=Arabidopsis thaliana GN=YLS3 PE=2 SV=1	Probable lipid transfer
BnaA01T0217700WE	-0.232001	0.0538552	0.433515	0.099405	0.75726	0.013782	GO:0005506	linoleate 9S-lipoxygenase 5, chloroplastic; K15718 linoleate 9S-lipoxygenase [EC:1.13.11.58] (A)	Linoleate 9S-lipoxygenase 5, chloroplastic OS=Arabidopsis thaliana GN=LOX5 PE=2 SV=2	PLAT/LH2 domain
BnaA01T0219100WE	0.349722	0.0430905	0.503622	0.024075	0.938763	0.00602288	GO:0008483	gamma-aminobutyrate transaminase POP2, mitochondrial-like; K16871 4-aminobutyrate---pyruvate transaminase [EC:2.6.1.96] (A)	Gamma-aminobutyrate transaminase POP2, mitochondrial OS=Arabidopsis thaliana GN=POP2 PE=1 SV=1	Aminotransferase class-III
BnaA01T0225100WE	0.121319	0.190821	0.546044	0.00926701	0.678051	0.00457083	--	uncharacterized LOC103446271; K13506 glycerol-3-phosphate O-acyltransferase 3/4 [EC:2.3.1.15] (A)	Uncharacterized protein At1g04910 OS=Arabidopsis thaliana GN=At1g04910 PE=2 SV=1	GDP-fucose protein O-fucosyltransferase
BnaA01T0230200WE	0.573008	0.310034	0.25841	0.211017	0.65232	0.0291599	GO:0005515	MATH domain-containing protein At5g43560-like; K10523 speckle-type POZ protein (A)	Ubiquitin carboxyl-terminal hydrolase 12 OS=Arabidopsis thaliana GN=UBP12 PE=1 SV=2	MATH domain
BnaA01T0233500WE	-0.0819848	0.327006	0.814094	0.0889024	1.5321	0.00263392	GO:0003924	hypothetical protein; K17065 dynamin 1-like protein [EC:3.6.5.5] (A)	Dynamin-like protein ARC5 OS=Arabidopsis thaliana GN=ARC5 PE=1 SV=2	Dynamin family
BnaA01T0235800WE	-0.48174	0.0238574	-0.121592	0.298185	0.618301	0.00356835	GO:0006508	hypothetical protein; K16292 KDEL-tailed cysteine endopeptidase [EC:3.4.22.-] (A)	Cysteine proteinase RD21a OS=Arabidopsis thaliana GN=RD21A PE=1 SV=1	Granulin
BnaA01T0239100WE	0.392569	0.027512	-0.740075	0.00347399	-1.24658	0.00291673	GO:0003735	hypothetical protein; K02908 large subunit ribosomal protein L30e (A)	Putative 60S ribosomal protein L30-1 OS=Arabidopsis thaliana GN=RPL30A PE=3 SV=1	Ribosomal protein L7Ae/L30e/S12e/Gadd45 family
BnaA01T0240600WE	-0.0938956	0.352093	-0.165976	0.327437	0.614551	0.0459354	GO:0006891	protein CASP; K09313 homeobox protein cut-like (A)	Protein CASP OS=Arabidopsis thaliana GN=CASP PE=1 SV=2	CASP C terminal
BnaA01T0245400WE	-0.0766787	0.301847	0.144043	0.134622	0.523309	0.0176198	GO:0004152	dihydropyrimidine dehydrogenase (NADP(+)), chloroplastic-like; K00207 dihydropyrimidine dehydrogenase (NADP+) [EC:1.3.1.2] (A)	Dihydropyrimidine dehydrogenase (NADP(+)), chloroplastic OS=Arabidopsis thaliana GN=PYD1 PE=1 SV=1	Dihydroorotate dehydrogenase
BnaA01T0252200WE	-0.0213282	0.350627	0.441979	0.0102402	0.588011	0.0195129	GO:0005515	protein TOPLESS-like; K14963 COMPASS component SWD3 (A)	Topless-related protein 2 OS=Arabidopsis thaliana GN=TPR2 PE=1 SV=2	WD domain, G-beta repeat
BnaA01T0254600WE	0.331435	0.198108	-0.0480304	0.186508	-0.591041	0.0149854	--	uncharacterized LOC104583002; K04506 E3 ubiquitin-protein ligase SIAH1 [EC:2.3.2.27] (A)	Jacalin-related lectin 34 OS=Arabidopsis thaliana GN=JAL34 PE=1 SV=1	Jacalin-like lectin domain
BnaA01T0254900WE	0.332207	0.0497938	0.0348344	0.378254	-0.991236	0.0014125	--	disease resistance protein RPM1-like; K13457 disease resistance protein RPM1 (A)	Jacalin-related lectin 33 OS=Arabidopsis thaliana GN=JAL33 PE=1 SV=1	Jacalin-like lectin domain
BnaA01T0258900WE	0.15358	0.0931215	0.339966	0.00279647	0.531795	0.00489667	GO:0003824	phospholipase D alpha 2; K01115 phospholipase D1/2 [EC:3.1.4.4] (A)	Phospholipase D alpha 2 OS=Brassica oleracea var. capitata GN=PLD2 PE=1 SV=2	C2 domain
BnaA01T0260000WE	0.0628635	0.150093	-0.353597	0.106102	1.08297	0.0471346	GO:0000786	probable histone H2A variant 3; K11251 histone H2A (A)	Probable histone H2A variant 3 OS=Arabidopsis thaliana GN=At1g52740 PE=1 SV=1	Core histone H2A/H2B/H3/H4
BnaA01T0261100WE	0.200351	0.0173183	0.55939	0.0681188	-1.7636	0.00309372	--	asns; asparagine synthetase; K01953 asparagine synthase (glutamine-hydrolysing) [EC:6.3.5.4] (A)	Stem-specific protein TSJT1 OS=Nicotiana tabacum GN=TSJT1 PE=2 SV=1	Aluminium induced protein
BnaA01T0265200WE	-0.159574	0.364941	0.661583	0.01152	1.10402	0.0205467	GO:0005506	cytochrome P450 CYP72A219-like; K07428 cytochrome P450, family 4, subfamily X [EC:1.14.14.1] (A)	Cytochrome P450 72A15 OS=Arabidopsis thaliana GN=CYP72A15 PE=2 SV=1	Cytochrome P450
BnaA01T0265300WE	-0.0433133	0.25953	0.582759	0.0259973	1.12182	0.000726963	GO:0005506	cytochrome P450 CYP72A219-like; K07428 cytochrome P450, family 4, subfamily X [EC:1.14.14.1] (A)	Cytochrome P450 72A13 OS=Arabidopsis thaliana GN=CYP72A13 PE=2 SV=1	Cytochrome P450
BnaA01T0267000WE	-0.291358	0.0208631	0.640641	0.00566317	1.43938	0.00614098	GO:0004857	pectinesterase/pectinesterase inhibitor 3-like; K01051 pectinesterase [EC:3.1.1.11] (A)	Pectinesterase/pectinesterase inhibitor 3 OS=Arabidopsis thaliana GN=PME3 PE=2 SV=2	Plant invertase/pectin methylesterase inhibitor
BnaA01T0267900WE	0.573986	0.159538	-0.696075	0.0811735	0.536987	0.0174117	GO:0006629	geranylgeranyl diphosphate reductase, chloroplastic; K10960 geranylgeranyl reductase [EC:1.3.1.83] (A)	GDSL esterase/lipase At3g14220 OS=Arabidopsis thaliana GN=At3g14220 PE=1 SV=1	GDSL-like Lipase/Acylhydrolase
BnaA01T0269300WE	-0.614271	0.0177616	0.578275	0.0181203	0.843417	0.00217616	GO:0004252	peptidase, putative (EC:3.4.21.25); K18443 golgi-specific brefeldin A-resistance guanine nucleotide exchange factor 1 (A)	Subtilisin-like protease SBT1.7 OS=Arabidopsis thaliana GN=SBT1.7 PE=1 SV=1	PA domain
BnaA01T0270500WE	0.30918	0.252029	-0.458255	0.0404351	1.15218	0.0466822	GO:0003677	DNA-directed RNA polymerase I subunit rpa49-like; K03005 DNA-directed RNA polymerase I subunit RPA49 (A)	DNA-directed RNA polymerase I subunit rpa49 OS=Dictyostelium discoideum GN=polr1e PE=3 SV=1	A49-like RNA polymerase I associated factor
BnaA01T0271600WE	-0.444871	0.103429	0.339927	0.0679811	1.49163	0.027697	--	3-epi-6-deoxocathasterone 23-monooxygenase; K12638 3-epi-6-deoxocathasterone 23-monooxygenase [EC:1.14.13.112] (A)	PRA1 family protein F4 OS=Arabidopsis thaliana GN=PRA1F4 PE=2 SV=1	PRA1 family protein
BnaA01T0273100WE	-0.331206	0.0140267	0.196201	0.288722	-0.624471	0.0260571	GO:0004497	sterol 14-demethylase-like; K05917 sterol 14-demethylase [EC:1.14.13.70] (A)	Sterol 14-demethylase OS=Arabidopsis thaliana GN=CYP51G1 PE=1 SV=1	Cytochrome P450
BnaA01T0273500WE	-0.274987	0.174558	0.420845	0.128991	0.848233	0.0220262	GO:0003676	serine/arginine-rich SC35-like splicing factor SCL30A; K12900 FUS-interacting serine-arginine-rich protein 1 (A)	Serine/arginine-rich SC35-like splicing factor SCL30A OS=Arabidopsis thaliana GN=SCL30A PE=1 SV=1	RNA recognition motif. (a.k.a. RRM, RBD, or RNP domain)
BnaA01T0274100WE	-1.15713	0.00605653	0.255198	0.286191	-0.737093	0.014921	--	uncharacterized LOC105790132; K20102 YTH domain-containing family protein (A)	YTH domain-containing family protein 2 OS=Mus musculus GN=Ythdf2 PE=2 SV=1	YT521-B-like domain
BnaA01T0274400WE	-0.234227	0.387496	-0.231088	0.213841	1.05935	0.0120755	--	--	--	--
BnaA01T0276100WE	0.22166	0.124863	0.126799	0.378582	-0.684011	0.00366304	--	pentatricopeptide repeat-containing protein At1g52620-like; K17964 leucine-rich PPR motif-containing protein, mitochondrial (A)	Pentatricopeptide repeat-containing protein At3g13160, mitochondrial OS=Arabidopsis thaliana GN=At3g13160 PE=2 SV=1	PPR repeat
BnaA01T0280300WE	-3.07324	0.12801	-0.506776	0.154981	1.51095	0.0492888	GO:0005515	LRR receptor-like serine/threonine-protein kinase FLS2; K13420 LRR receptor-like serine/threonine-protein kinase FLS2 [EC:2.7.11.1] (A)	DNA-damage-repair/toleration protein DRT100 OS=Arabidopsis thaliana GN=DRT100 PE=2 SV=2	Leucine rich repeat N-terminal domain
BnaA01T0281300WE	-0.404376	0.00930942	-0.512691	0.0321954	1.36445	0.00492764	GO:0005622	hypothetical protein; K08066 nuclear transcription factor Y, gamma (A)	Dr1-associated corepressor OS=Homo sapiens GN=DRAP1 PE=1 SV=3	Histone-like transcription factor (CBF/NF-Y) and archaeal histone
BnaA01T0281700WE	-0.368682	0.0223048	-0.353444	0.0242185	-0.537683	0.0353545	GO:0005515	GRMZM2G129493, GRMZM2G362362; uncharacterized LOC103648573; K01188 beta-glucosidase [EC:3.2.1.21] (A)	Polygalacturonase inhibitor 1 OS=Arabidopsis thaliana GN=PGIP1 PE=2 SV=1	Leucine Rich repeat
BnaA01T0282200WE	-0.292175	0.0675803	0.198043	0.00491908	0.99266	0.000407635	GO:0003700	transcription factor TGA6-like; K14431 transcription factor TGA (A)	Transcription factor TGA6 OS=Arabidopsis thaliana GN=TGA6 PE=1 SV=2	bZIP transcription factor
BnaA01T0291200WE	-0.105878	0.300682	-0.15867	0.337023	1.34757	0.0193586	GO:0046373	alpha-L-arabinofuranosidase 1; K01209 alpha-N-arabinofuranosidase [EC:3.2.1.55] (A)	Alpha-L-arabinofuranosidase 1 OS=Arabidopsis thaliana GN=ASD1 PE=1 SV=1	Alpha-L-arabinofuranosidase C-terminal domain
BnaA01T0292800WE	0.236209	0.0185221	0.0153536	0.322965	-0.50212	0.00386914	GO:0016491	sulfite reductase [ferredoxin], chloroplastic-like; K00392 sulfite reductase (ferredoxin) [EC:1.8.7.1] (A)	Sulfite reductase [ferredoxin], chloroplastic OS=Arabidopsis thaliana GN=SIR PE=1 SV=1	Nitrite/Sulfite reductase ferredoxin-like half domain
BnaA01T0295800WE	0.383703	0.0174441	0.338032	0.0200873	0.531272	0.00692754	GO:0004368	glycerol-3-phosphate dehydrogenase SDP6, mitochondrial-like; K00111 glycerol-3-phosphate dehydrogenase [EC:1.1.5.3] (A)	Glycerol-3-phosphate dehydrogenase SDP6, mitochondrial OS=Arabidopsis thaliana GN=SDP6 PE=1 SV=1	FAD dependent oxidoreductase
BnaA01T0301400WE	-0.551587	0.0904206	-0.468697	0.257674	-0.72819	0.0462099	GO:0030145	uncharacterized LOC101250545; K11426 SET and MYND domain-containing protein (A)	Germin-like protein subfamily 1 member 7 OS=Arabidopsis thaliana GN=At3g05950 PE=2 SV=1	Cupin
BnaA01T0304400WE	-0.1808	0.0188353	-0.272927	0.0125724	-0.576697	0.00114905	GO:0003735	60S ribosomal protein L22-2-like; K02891 large subunit ribosomal protein L22e (A)	60S ribosomal protein L22-2 OS=Arabidopsis thaliana GN=RPL22B PE=2 SV=1	Ribosomal L22e protein family
BnaA01T0306500WE	-1.00125	0.168935	0.610703	0.0573248	1.51308	0.0474065	GO:0004672	probable serine/threonine-protein kinase At1g54610; K08819 cyclin-dependent kinase 12/13 [EC:2.7.11.22 2.7.11.23] (A)	Probable serine/threonine-protein kinase At1g54610 OS=Arabidopsis thaliana GN=At1g54610 PE=1 SV=1	Protein kinase domain
BnaA01T0310800WE	-0.27607	0.163064	0.337593	0.0258379	0.853995	0.0303667	GO:0004407	histone deacetylase 19; K06067 histone deacetylase 1/2 [EC:3.5.1.98] (A)	Histone deacetylase 19 OS=Arabidopsis thaliana GN=HDA19 PE=1 SV=2	Histone deacetylase domain
BnaA01T0311300WE	-0.189169	0.156338	-0.0697423	0.33942	1.11245	0.0194962	--	--	AT-hook motif nuclear-localized protein 19 OS=Arabidopsis thaliana GN=AHL19 PE=2 SV=1	Domain of unknown function (DUF296)
BnaA01T0312200WE	-0.0980411	0.214703	0.058527	0.0944216	0.757184	0.015983	GO:0016757	Glycogenin-1; K00750 glycogenin glucosyltransferase [EC:2.4.1.186] (A)	Inositol phosphorylceramide glucuronosyltransferase 1 OS=Arabidopsis thaliana GN=IPUT1 PE=1 SV=1	Glycosyl transferase family 8
BnaA01T0315000WE	0.252103	0.267987	0.957121	0.0656543	3.24579	0.0114023	GO:0006520	probable glutamate dehydrogenase 3; K00261 glutamate dehydrogenase (NAD(P)+) [EC:1.4.1.3] (A)	Probable glutamate dehydrogenase 3 OS=Arabidopsis thaliana GN=GSH3 PE=3 SV=1	Glutamate/Leucine/Phenylalanine/Valine dehydrogenase
BnaA01T0319700WE	-0.103278	0.312365	-0.161321	0.0394124	0.513464	0.0163099	GO:0008137	probable NADH dehydrogenase [ubiquinone] 1 alpha subcomplex subunit 12; K11352 NADH dehydrogenase (ubiquinone) 1 alpha subcomplex subunit 12 (A)	Probable NADH dehydrogenase [ubiquinone] 1 alpha subcomplex subunit 12 OS=Arabidopsis thaliana GN=At3g03100 PE=1 SV=1	NADH ubiquinone oxidoreductase subunit NDUFA12
BnaA01T0319900WE	0.557158	0.123254	-1.28154	0.00903158	0.581252	0.0270739	--	NADH dehydrogenase [ubiquinone] iron-sulfur protein 6, mitochondrial-like; K03939 NADH dehydrogenase (ubiquinone) Fe-S protein 6 (A)	NADH dehydrogenase [ubiquinone] iron-sulfur protein 6, mitochondrial OS=Arabidopsis thaliana GN=At3g03070 PE=3 SV=1	Zinc-finger domain
BnaA01T0326000WE	0.488754	0.100685	-0.249646	0.165221	-0.534981	0.0167643	GO:0016866	UDP-arabinopyranose mutase 1-like; K13379 reversibly glycosylated polypeptide / UDP-arabinopyranose mutase [EC:2.4.1.- 5.4.99.30] (A)	UDP-arabinopyranose mutase 1 OS=Arabidopsis thaliana GN=RGP1 PE=1 SV=1	Reversibly glycosylated polypeptide
BnaA01T0329100WE	-0.240543	0.0698644	0.0828084	0.0997668	1.43561	0.0109452	--	uncharacterized LOC103421379; K17609 nucleoredoxin [EC:1.8.1.8] (A)	Protein SIEVE ELEMENT OCCLUSION B OS=Arabidopsis thaliana GN=SEOB PE=1 SV=1	Sieve element occlusion C-terminus
BnaA01T0330300WE	-0.376944	0.0301028	-0.0219312	0.0703003	0.714375	0.00653272	GO:0003676	ribonuclease HI; K03469 ribonuclease HI [EC:3.1.26.4] (A)	Uncharacterized protein Mb2253c OS=Mycobacterium bovis (strain ATCC BAA-935 / AF2122/97) GN=Mb2253c PE=3 SV=1	Caulimovirus viroplasmin
BnaA01T0330500WE	-0.14199	0.163479	-0.406237	0.0625738	-1.05747	0.0199705	GO:0015992	V-type proton ATPase subunit G1-like; K02152 V-type H+-transporting ATPase subunit G (A)	V-type proton ATPase subunit G1 OS=Arabidopsis thaliana GN=VHA-G1 PE=2 SV=1	Vacuolar (H+)-ATPase G subunit
BnaA01T0331100WE	-0.0331302	0.338008	0.102962	0.0487531	0.716748	0.00660772	GO:0003993	inositol hexakisphosphate and diphosphoinositol-pentakisphosphate kinase-like; K13024 inositol-hexakisphosphate/diphosphoinositol- pentakisphosphate 1-kinase [EC:2.7.4.24] (A)	Inositol hexakisphosphate and diphosphoinositol-pentakisphosphate kinase 1 OS=Homo sapiens GN=PPIP5K1 PE=1 SV=1	RimK-like ATP-grasp domain
BnaA01T0333600WE	0.147668	0.0450879	0.372738	0.0230777	1.64673	0.00272014	GO:0004435	phosphoinositide phospholipase C 2; K05857 phosphatidylinositol phospholipase C, delta [EC:3.1.4.11] (A)	Phosphoinositide phospholipase C 2 OS=Arabidopsis thaliana GN=PLC2 PE=1 SV=1	C2 domain
BnaA01T0336200WE	0.270863	0.00774811	0.389231	0.0275519	-0.554221	0.00753774	GO:0006810	hypothetical protein; K14825 protein ERP2 (A)	Transmembrane emp24 domain-containing protein p24beta2 OS=Arabidopsis thaliana GN=At3g07680 PE=1 SV=1	emp24/gp25L/p24 family/GOLD
BnaA01T0336900WE	-0.233433	0.117882	0.878262	0.00431705	1.8208	0.0105808	GO:0016021	ceramidase; K12349 neutral ceramidase [EC:3.5.1.23] (A)	Cytochrome b561 and DOMON domain-containing protein At3g07570 OS=Arabidopsis thaliana GN=At3g07570 PE=2 SV=1	Eukaryotic cytochrome b561
BnaA02T0000500WE	0.20796	0.139591	-0.061042	0.377002	-0.601159	0.0199951	GO:0042823	pyridoxal biosynthesis protein PDX1.3; K06215 pyridoxal 5'-phosphate synthase pdxS subunit [EC:4.3.3.6] (A)	Pyridoxal 5'-phosphate synthase subunit PDX1.3 OS=Arabidopsis thaliana GN=PDX13 PE=1 SV=2	SOR/SNZ family
BnaA02T0001300WE	-1.95622	0.0199414	-1.57442	0.13468	-2.98254	0.0354533	GO:0000287	pyruvate decarboxylase 4; K01568 pyruvate decarboxylase [EC:4.1.1.1] (A)	Pyruvate decarboxylase 4 OS=Arabidopsis thaliana GN=PDC4 PE=2 SV=1	Thiamine pyrophosphate enzyme, C-terminal TPP binding domain
BnaA02T0001900WE	0.725625	0.00380172	-0.119616	0.0408735	-1.21933	0.000887427	GO:0016747	BAHD acyltransferase DCR; K19747 BAHD acyltransferase [EC:2.3.1.-] (A)	Uncharacterized acetyltransferase At3g50280 OS=Arabidopsis thaliana GN=At3g50280 PE=3 SV=1	Transferase family
BnaA02T0009500WE	-0.436939	0.105908	0.385487	0.0532174	0.862515	0.0235691	GO:0005515	protein gar2; K14411 RNA-binding protein Musashi (A)	Protein IQ-DOMAIN 1 OS=Arabidopsis thaliana GN=IQD1 PE=1 SV=1	IQ calmodulin-binding motif
BnaA02T0011800WE	-0.358467	0.0956855	-0.0936283	0.330199	-0.555756	0.00300116	GO:0003824	FAD synthase-like; K00953 FAD synthetase [EC:2.7.7.2] (A)	Probable FAD synthase OS=Schizosaccharomyces pombe (strain 972 / ATCC 24843) GN=SPCC1235.04c PE=3 SV=1	Probable molybdopterin binding domain
BnaA02T0018500WE	-0.307617	0.0221936	0.53381	0.00243171	0.502028	0.00699058	GO:0005515	cellulose synthase A catalytic subunit 3 [UDP-forming]; K10999 cellulose synthase A [EC:2.4.1.12] (A)	Cellulose synthase A catalytic subunit 3 [UDP-forming] OS=Arabidopsis thaliana GN=CESA3 PE=1 SV=2	Zinc-binding RING-finger
BnaA02T0024100WE	-0.396624	0.202211	0.471833	0.0608172	1.30262	0.00411105	GO:0005506	cytochrome P450 93A2-like; K00512 steroid 17alpha-monooxygenase / 17alpha-hydroxyprogesterone aldolase [EC:1.14.14.19 4.1.2.30] (A)	3,9-dihydroxypterocarpan 6A-monooxygenase OS=Glycine max GN=CYP93A1 PE=1 SV=1	Cytochrome P450
BnaA02T0025800WE	0.541436	0.0323454	-0.171192	0.332965	-1.63588	0.0241761	GO:0006520	glutamate dehydrogenase 2-like; K00261 glutamate dehydrogenase (NAD(P)+) [EC:1.4.1.3] (A)	Glutamate dehydrogenase 2 OS=Arabidopsis thaliana GN=GDH2 PE=1 SV=1	Glu/Leu/Phe/Val dehydrogenase, dimerisation domain
BnaA02T0028600WE	-0.435334	0.0442625	0.227472	0.0519442	-1.82138	0.00312431	GO:0004418	porphobilinogen deaminase, chloroplastic-like; K01749 hydroxymethylbilane synthase [EC:2.5.1.61] (A)	Porphobilinogen deaminase, chloroplastic OS=Arabidopsis thaliana GN=HEMC PE=1 SV=1	Porphobilinogen deaminase, C-terminal domain
BnaA02T0029100WE	-1.08251	0.21698	0.373442	0.221118	0.899737	0.0336651	GO:0004553	alpha-galactosidase-like; K07407 alpha-galactosidase [EC:3.2.1.22] (A)	Alpha-galactosidase 2 OS=Arabidopsis thaliana GN=AGAL2 PE=1 SV=1	Melibiase
BnaA02T0033900WE	-0.127144	0.158694	-0.123672	0.246514	0.993075	0.00458706	GO:0003676	RNA-binding protein 39-like; K13091 RNA-binding protein 39 (A)	RNA-binding protein 39 OS=Pongo abelii GN=RBM39 PE=2 SV=1	linker between RRM2 and RRM3 domains in RBM39 protein
BnaA02T0037000WE	0.21958	0.231361	-0.253687	0.206662	-1.07142	0.0452517	--	--	--	Protein of unknown function, DUF599
BnaA02T0040500WE	-0.473406	0.10174	0.197201	0.228141	-1.80222	0.00165369	GO:0008080	cwf24; zf-C3HC4 type (RING finger)/GCN5-related N acetyltransferase fusion protein; K13127 RING finger protein 113A (A)	N-alpha-acetyltransferase 50 OS=Danio rerio GN=naa50 PE=1 SV=1	Acetyltransferase (GNAT) family
BnaA02T0048100WE	0.236948	0.130746	-0.204553	0.219031	-0.686893	0.037052	GO:0005975	transaldolase-like; K00616 transaldolase [EC:2.2.1.2] (A)	Transaldolase 2 OS=Streptomyces avermitilis (strain ATCC 31267 / DSM 46492 / JCM 5070 / NCIMB 12804 / NRRL 8165 / MA-4680) GN=tal2 PE=3 SV=1	Transaldolase
BnaA02T0050700WE	0.386113	0.161154	0.483729	0.202583	-0.500771	0.0204883	GO:0008080	N-terminal acetyltransferase A complex catalytic subunit ard1; K00670 peptide alpha-N-acetyltransferase [EC:2.3.1.88] (A)	N-alpha-acetyltransferase 11 OS=Mus musculus GN=Naa11 PE=2 SV=1	Acetyltransferase (GNAT) family
BnaA02T0051700WE	-0.21732	0.0130837	-0.315336	0.0874703	-0.540328	0.023529	GO:0005783	translocon-associated protein subunit beta-like; K13250 translocon-associated protein subunit beta (A)	Translocon-associated protein subunit beta OS=Canis familiaris GN=SSR2 PE=1 SV=1	Translocon-associated protein beta (TRAPB)
BnaA02T0059700WE	-0.245317	0.0951603	-0.377632	0.331109	-1.15094	0.0010905	GO:0005515	ribosome biogenesis protein WDR12 homolog; K14863 ribosome biogenesis protein YTM1 (A)	Ribosome biogenesis protein WDR12 homolog OS=Chlamydomonas reinhardtii GN=CHLREDRAFT_128420 PE=3 SV=2	NLE (NUC135) domain
BnaA02T0062400WE	-0.0531218	0.131975	-0.299393	0.0413728	-0.789425	0.00161841	GO:0003735	caffeoylshikimate esterase-like; K01054 acylglycerol lipase [EC:3.1.1.23] (A)	40S ribosomal protein S7-3 OS=Arabidopsis thaliana GN=RPS7C PE=1 SV=2	Alpha/beta hydrolase family
BnaA02T0063100WE	-0.438582	0.14291	-1.14993	0.0313357	-2.43112	0.00352292	--	acetolactate synthase small subunit 1, chloroplastic; K01653 acetolactate synthase I/III small subunit [EC:2.2.1.6] (A)	Acetolactate synthase small subunit 1, chloroplastic OS=Arabidopsis thaliana GN=VAT1 PE=1 SV=1	ACT domain
BnaA02T0064500WE	-0.123434	0.259798	0.0620193	0.289861	2.25581	0.0138471	GO:0004356	glutamine synthetase cytosolic isozyme 1-4-like; K01915 glutamine synthetase [EC:6.3.1.2] (A)	Glutamine synthetase cytosolic isozyme 1-4 OS=Arabidopsis thaliana GN=GLN1-4 PE=1 SV=1	Glutamine synthetase, beta-Grasp domain
BnaA02T0064600WE	-0.0351098	0.195567	0.185054	0.115513	0.680604	0.00465263	GO:0004672	pollen receptor-like kinase 2; K04730 interleukin-1 receptor-associated kinase 1 [EC:2.7.11.1] (A)	Probable inactive receptor kinase At5g16590 OS=Arabidopsis thaliana GN=At5g16590 PE=1 SV=1	Leucine rich repeat N-terminal domain
BnaA02T0064700WE	0.0772935	0.12483	-0.0887218	0.225766	-0.537207	0.00170166	GO:0000166	ABC transporter F family member 1; K06185 ATP-binding cassette, subfamily F, member 2 (A)	ABC transporter F family member 1 OS=Arabidopsis thaliana GN=ABCF1 PE=1 SV=1	ABC transporter
BnaA02T0066400WE	0.708263	0.0147786	0.223493	0.0676834	-0.594852	0.0322044	GO:0000166	ATPase family AAA domain-containing protein 3-B-like; K17681 ATPase family AAA domain-containing protein 3A/B (A)	ATPase family AAA domain-containing protein 3-B OS=Xenopus laevis GN=atad3-b PE=2 SV=1	ATPase family associated with various cellular activities (AAA)
BnaA02T0069800WE	-0.195716	0.0306296	-0.0195257	0.319597	0.500155	0.00737018	GO:0005975	Phosphomannomutase; K01840 phosphomannomutase [EC:5.4.2.8] (A)	Phosphomannomutase/phosphoglucomutase OS=Pseudomonas putida (strain KT2440) GN=algC PE=3 SV=1	Phosphoglucomutase/phosphomannomutase, alpha/beta/alpha domain III
BnaA02T0070900WE	0.129862	0.165681	-0.978542	0.015419	-0.652426	0.0174527	GO:0000774	grpE protein homolog, mitochondrial; K03687 molecular chaperone GrpE (A)	Protein GrpE OS=Thermosynechococcus elongatus (strain BP-1) GN=grpE PE=3 SV=1	GrpE
BnaA02T0072300WE	0.690254	0.0258351	-0.123526	0.0843658	-0.608529	0.00843819	GO:0003723	eukaryotic translation initiation factor NCBP-like; K03259 translation initiation factor 4E (A)	Eukaryotic translation initiation factor NCBP OS=Arabidopsis thaliana GN=NCBP PE=2 SV=1	Eukaryotic initiation factor 4E
BnaA02T0079400WE	-0.334436	0.059729	-0.347309	0.207793	-1.2059	0.0142509	GO:0006520	aspartate aminotransferase, cytoplasmic isozyme 1-like; K14454 aspartate aminotransferase, cytoplasmic [EC:2.6.1.1] (A)	Aspartate aminotransferase, cytoplasmic isozyme 1 OS=Arabidopsis thaliana GN=ASP2 PE=1 SV=2	Aminotransferase class I and II
BnaA02T0082500WE	-1.68529	0.0168225	-0.212647	0.149576	-0.950851	0.0176741	GO:0000166	26S protease regulatory subunit 8 homolog A-like; K03066 26S proteasome regulatory subunit T6 (A)	26S protease regulatory subunit 8 homolog A OS=Arabidopsis thaliana GN=RPT6A PE=1 SV=1	ATPase family associated with various cellular activities (AAA)
BnaA02T0083900WE	-0.000652038	0.38699	-0.0796721	0.355123	0.985012	0.0209388	--	uncharacterized LOC103947160; K03655 ATP-dependent DNA helicase RecG [EC:3.6.4.12] (A)	Nuclear pore complex protein NUP1 OS=Arabidopsis thaliana GN=NUP1 PE=1 SV=1	--
BnaA02T0085400WE	-0.0405671	0.228433	0.117768	0.11094	0.555769	0.0122168	GO:0003774	myosin-17-like; K10357 myosin V (A)	Myosin-17 OS=Arabidopsis thaliana GN=XI-K PE=1 SV=2	Myosin N-terminal SH3-like domain
BnaA02T0088000WE	-0.657297	0.0119366	0.721954	0.0276999	1.13701	0.0467382	GO:0004553	glucan endo-1,3-beta-glucosidase 5-like; K19893 glucan endo-1,3-beta-glucosidase 5/6 [EC:3.2.1.39] (A)	Glucan endo-1,3-beta-glucosidase 5 OS=Arabidopsis thaliana GN=At4g31140 PE=1 SV=1	X8 domain
BnaA02T0091700WE	-0.454976	0.0513538	0.744824	0.0380361	0.839514	0.0268693	GO:0000166	replication factor C subunit 1; K10754 replication factor C subunit 1 (A)	Replication factor C subunit 1 OS=Arabidopsis thaliana GN=RFC1 PE=2 SV=1	ATPase family associated with various cellular activities (AAA)
BnaA02T0092500WE	0.281522	0.0802703	0.627689	0.00248869	0.620576	0.0320586	GO:0016491	NDC1; NAD(P)H dehydrogenase C1; K17872 NADH:ubiquinone reductase (non-electrogenic) [EC:1.6.5.9] (A)	Apoptosis-inducing factor homolog A OS=Dictyostelium discoideum GN=aifA PE=3 SV=1	Pyridine nucleotide-disulphide oxidoreductase
BnaA02T0095800WE	-0.364397	0.13696	0.0111563	0.340813	-0.79718	0.0177554	--	histone deacetylase HDT1; K11276 nucleophosmin 1 (A)	Histone deacetylase HDT2 OS=Arabidopsis thaliana GN=HDT2 PE=1 SV=2	--
BnaA02T0101300WE	-0.102918	0.29185	-0.146155	0.249109	1.03247	0.0258528	GO:0006508	thiol protease aleurain-like; K01366 cathepsin H [EC:3.4.22.16] (A)	Thiol protease aleurain OS=Arabidopsis thaliana GN=ALEU PE=1 SV=2	Cathepsin propeptide inhibitor domain (I29)
BnaA02T0105500WE	-0.206963	0.190248	0.163442	0.21021	1.21996	0.0211932	GO:0000786	hypothetical protein; K11254 histone H4 (A)	Histone H4 OS=Glycine max PE=3 SV=1	Core histone H2A/H2B/H3/H4
BnaA02T0118100WE	-1.50086	0.0346727	-1.68598	0.0556239	-0.527686	0.018142	GO:0004553	xyloglucan endotransglucosylase/hydrolase protein 22; K14504 xyloglucan:xyloglucosyl transferase TCH4 [EC:2.4.1.207] (A)	Xyloglucan endotransglucosylase/hydrolase protein 22 OS=Arabidopsis thaliana GN=XTH22 PE=1 SV=1	Xyloglucan endo-transglycosylase (XET) C-terminus
BnaA02T0119800WE	-1.62046	0.0149092	-1.0273	0.0450638	-0.602875	0.0398967	GO:0003735	60S acidic ribosomal protein P3-2-like; K02942 large subunit ribosomal protein LP1 (A)	60S acidic ribosomal protein P3-2 OS=Arabidopsis thaliana GN=RPP3B PE=2 SV=1	60s Acidic ribosomal protein
BnaA02T0120800WE	0.060246	0.266049	0.25816	0.0190527	0.962811	0.0109891	GO:0000166	calcium-transporting ATPase 8, plasma membrane-type; K01537 Ca2+-transporting ATPase [EC:3.6.3.8] (A)	Calcium-transporting ATPase 8, plasma membrane-type OS=Arabidopsis thaliana GN=ACA8 PE=1 SV=1	Cation transporter/ATPase, N-terminus
BnaA02T0122600WE	0.0620455	0.168994	-0.14339	0.368111	-0.666089	0.0408528	GO:0003735	60S ribosomal protein L31-3; K02910 large subunit ribosomal protein L31e (A)	60S ribosomal protein L31-3 OS=Arabidopsis thaliana GN=RPL31C PE=2 SV=2	Ribosomal protein L31e
BnaA02T0126100WE	0.0561477	0.275104	-1.52905	0.0110597	0.983787	0.0270467	--	RPM1-interacting protein 4-like; K13456 RPM1-interacting protein 4 (A)	RPM1-interacting protein 4 OS=Arabidopsis thaliana GN=RIN4 PE=1 SV=1	Cleavage site for pathogenic type III effector avirulence factor Avr
BnaA02T0126800WE	-0.291438	0.0257373	-0.199525	0.176598	0.803887	0.0109899	--	myb-like protein X; K17046 protein DEK (A)	Midasin OS=Giardia intestinalis GN=MDN1 PE=3 SV=1	DEK C terminal domain
BnaA02T0128600WE	0.556832	0.290943	0.872499	0.0711781	-0.850926	0.0180787	GO:0003677	DNA topoisomerase 1; K03163 DNA topoisomerase I [EC:5.99.1.2] (A)	DNA topoisomerase 1 OS=Arabidopsis thaliana GN=TOP1 PE=1 SV=1	C-terminal topoisomerase domain
BnaA02T0131500WE	-0.201415	0.13269	-0.128174	0.38497	-1.13856	0.000823218	--	thiamine thiazole synthase, chloroplastic-like; K03146 thiamine thiazole synthase (A)	Thiamine thiazole synthase, chloroplastic OS=Arabidopsis thaliana GN=THI1 PE=1 SV=1	Thi4 family
BnaA02T0132900WE	0.0619875	0.357589	-0.595857	0.00808445	0.541437	0.0165313	GO:0010181	minor allergen Alt a 7-like; K03809 NAD(P)H dehydrogenase (quinone) [EC:1.6.5.2] (A)	NAD(P)H dehydrogenase (quinone) FQR1 OS=Arabidopsis thaliana GN=FQR1 PE=1 SV=1	NADPH-dependent FMN reductase
BnaA02T0133700WE	0.122508	0.269091	-0.0120013	0.269914	-0.777272	0.00388089	GO:0006479	protein arginine N-methyltransferase PRMT10; K11434 type I protein arginine methyltransferase [EC:2.1.1.319] (A)	Protein arginine N-methyltransferase PRMT10 OS=Arabidopsis thaliana GN=PRMT10 PE=1 SV=1	PRMT5 arginine-N-methyltransferase
BnaA02T0141000WE	0.678707	0.0672262	0.0896027	0.221779	-1.31373	0.0108961	GO:0000166	ATP-dependent zinc metalloprotease FTSH 11, chloroplastic/mitochondrial; K08955 ATP-dependent metalloprotease [EC:3.4.24.-] (A)	ATP-dependent zinc metalloprotease FTSH 11, chloroplastic/mitochondrial OS=Arabidopsis thaliana GN=FTSH11 PE=1 SV=1	ATPase family associated with various cellular activities (AAA)
BnaA02T0151600WE	0.996951	0.0557162	-0.94257	0.0189968	-2.86205	0.00118011	--	TPR repeat region protein; K18168 succinate dehydrogenase assembly factor 2 (A)	Succinate dehydrogenase assembly factor 2, mitochondrial OS=Arabidopsis thaliana GN=SDHAF2 PE=1 SV=1	Flavinator of succinate dehydrogenase
BnaA02T0154200WE	-1.08674	0.106886	0.155503	0.0889083	1.55529	0.00180846	GO:0005247	chloride channel protein CLC-c; K05016 chloride channel 7 (A)	Chloride channel protein CLC-c OS=Arabidopsis thaliana GN=CLC-C PE=1 SV=1	CBS domain
BnaA02T0155000WE	-0.147556	0.169862	0.137496	0.256866	-1.03551	0.0321324	--	--	--	Nuclease-related domain
BnaA02T0156100WE	0.109998	0.205377	0.167556	0.159605	-0.675536	0.00159482	GO:0005515	Trimeric LpxA-like enzyme isoform 1; K03240 translation initiation factor eIF-2B subunit epsilon (A)	Basic leucine zipper and W2 domain-containing protein 1-A OS=Danio rerio GN=bzw1a PE=2 SV=1	eIF4-gamma/eIF5/eIF2-epsilon
BnaA02T0160200WE	-0.0438421	0.123563	-0.824143	0.000824994	-1.62123	0.00569808	GO:0004356	glutamine synthetase cytosolic isozyme 1-2; K01915 glutamine synthetase [EC:6.3.1.2] (A)	Glutamine synthetase cytosolic isozyme 1-2 OS=Arabidopsis thaliana GN=GLN1-2 PE=1 SV=2	Glutamine synthetase, beta-Grasp domain
BnaA02T0163500WE	-0.313698	0.00854316	0.788524	0.0348295	2.03646	0.0152743	--	--	--	Domain of unknown function (DUF4281)
BnaA02T0165800WE	0.314733	0.0881563	0.582202	0.024299	2.6023	0.0209317	--	CTD small phosphatase-like protein 2; K17616 CTD small phosphatase-like protein 2 [EC:3.1.3.-] (A)	REF/SRPP-like protein At1g67360 OS=Arabidopsis thaliana GN=At1g67360 PE=2 SV=1	Rubber elongation factor protein (REF)
BnaA02T0166700WE	-0.114148	0.308148	0.447627	0.019771	1.54681	0.0136204	GO:0006807	urease-like; K01427 urease [EC:3.5.1.5] (A)	Urease OS=Arabidopsis thaliana GN=URE PE=3 SV=1	Urease, gamma subunit
BnaA02T0169500WE	0.771173	0.0380641	-0.188082	0.333891	0.6172	0.0371851	GO:0008654	CDP-diacylglycerol--inositol 3-phosphatidyltransferase 1; K00999 CDP-diacylglycerol--inositol 3-phosphatidyltransferase [EC:2.7.8.11] (A)	CDP-diacylglycerol--inositol 3-phosphatidyltransferase 1 OS=Arabidopsis thaliana GN=PIS1 PE=1 SV=2	CDP-alcohol phosphatidyltransferase
BnaA02T0185700WE	0.162257	0.000668032	-0.471351	0.00165369	-0.812416	0.00436135	GO:0004089	beta carbonic anhydrase 4; K01673 carbonic anhydrase [EC:4.2.1.1] (A)	Beta carbonic anhydrase 4 OS=Arabidopsis thaliana GN=BCA4 PE=1 SV=1	Carbonic anhydrase
BnaA02T0188000WE	-0.303128	0.18956	0.0319525	0.085179	0.88258	0.0469874	--	SORBIDRAFT_02g000390, Sb02g000390; hypothetical protein; K04730 interleukin-1 receptor-associated kinase 1 [EC:2.7.11.1] (A)	Cysteine-rich repeat secretory protein 2 OS=Arabidopsis thaliana GN=CRRSP2 PE=1 SV=1	Salt stress response/antifungal
BnaA02T0189100WE	0.119157	0.211632	0.0943462	0.234033	0.683653	0.0369812	GO:0006952	--	MLP-like protein 28 OS=Arabidopsis thaliana GN=MLP28 PE=1 SV=1	Pathogenesis-related protein Bet v I family
BnaA02T0192500WE	0.00372229	0.00398102	0.0575136	0.00213171	0.654884	0.000964883	GO:0004672	SCY1-like protein 2; K17541 SCY1-like protein 2 (A)	SCY1-like protein 2 OS=Mus musculus GN=Scyl2 PE=1 SV=1	Protein kinase domain
BnaA02T0194300WE	-0.638756	0.0384603	0.722465	0.0825965	-0.889492	0.00223919	GO:0009058	histidinol-phosphate aminotransferase 1, chloroplastic; K00817 histidinol-phosphate aminotransferase [EC:2.6.1.9] (A)	Histidinol-phosphate aminotransferase 2, chloroplastic OS=Arabidopsis thaliana GN=HISN6B PE=2 SV=1	Aminotransferase class I and II
BnaA02T0196100WE	-0.354677	0.0030517	0.192649	0.105935	1.73338	0.0192951	GO:0006810	patellin-3-like; K19996 phosphatidylinositol transfer protein SFH5 (A)	Patellin-1 OS=Arabidopsis thaliana GN=PATL1 PE=1 SV=2	CRAL/TRIO, N-terminal domain
BnaA02T0196200WE	-0.346204	0.0557677	0.304373	0.0305214	1.35604	0.00668683	GO:0005215	patellin-5-like; K19996 phosphatidylinositol transfer protein SFH5 (A)	Patellin-3 OS=Arabidopsis thaliana GN=PATL3 PE=1 SV=2	CRAL/TRIO, N-terminal domain
BnaA02T0197800WE	0.0380829	0.22582	-0.53111	0.00137002	-0.676891	0.000604009	GO:0003735	40S ribosomal protein SA-like; K02998 small subunit ribosomal protein SAe (A)	40S ribosomal protein SA OS=Brassica napus GN=LRP PE=2 SV=1	Ribosomal protein S2
BnaA02T0199600WE	0.308959	0.185281	-0.389303	0.112199	-1.20552	0.00242045	GO:0003676	eukaryotic initiation factor 4A-3; K03257 translation initiation factor 4A (A)	Eukaryotic initiation factor 4A-3 OS=Arabidopsis thaliana GN=TIF4A-3 PE=1 SV=1	Helicase conserved C-terminal domain
BnaA02T0207300WE	0.175274	0.136874	-0.409105	0.0222698	-0.576663	0.00294982	GO:0008146	cytosolic sulfotransferase 16; K11821 desulfoglucosinolate sulfotransferase A/B/C [EC:2.8.2.-] (A)	Cytosolic sulfotransferase 16 OS=Arabidopsis thaliana GN=SOT16 PE=1 SV=1	Sulfotransferase domain
BnaA02T0211300WE	-0.49846	0.0223288	0.0472713	0.250195	-0.811408	0.0391893	GO:0009058	mannose-1-phosphate guanyltransferase alpha-like; K00966 mannose-1-phosphate guanylyltransferase [EC:2.7.7.13] (A)	Mannose-1-phosphate guanyltransferase alpha OS=Dictyostelium discoideum GN=gmppA PE=2 SV=1	Bacterial transferase hexapeptide (six repeats)
BnaA02T0215400WE	0.166064	0.178828	0.300021	0.0556485	1.00837	0.03477	GO:0000786	hypothetical protein; K11253 histone H3 (A)	Histone H3.3 OS=Vitis vinifera PE=2 SV=3	Core histone H2A/H2B/H3/H4
BnaA02T0217400WE	0.236611	0.0121222	0.3191	0.0120242	0.729981	0.0153441	GO:0003924	rac-like GTP-binding protein ARAC5; K04392 Ras-related C3 botulinum toxin substrate 1 (A)	Rac-like GTP-binding protein ARAC5 OS=Arabidopsis thaliana GN=ARAC5 PE=1 SV=1	Ras family
BnaA02T0218900WE	-0.156546	0.0523994	0.5111	0.017035	1.16356	0.0252402	GO:0005507	L-ascorbate oxidase homolog; K19791 iron transport multicopper oxidase (A)	L-ascorbate oxidase homolog OS=Brassica napus GN=Bp10 PE=2 SV=1	Multicopper oxidase
BnaA02T0219000WE	-0.0904796	0.182805	-0.219552	0.095584	0.950683	0.00434034	GO:0006950	--	Dehydrin ERD14 OS=Arabidopsis thaliana GN=ERD14 PE=1 SV=1	Dehydrin
BnaA02T0222700WE	0.379816	0.00215188	-0.11212	0.178756	-0.51533	0.00237195	GO:0010181	12-oxophytodienoate reductase 1; K05894 12-oxophytodienoic acid reductase [EC:1.3.1.42] (A)	12-oxophytodienoate reductase 1 OS=Arabidopsis thaliana GN=OPR1 PE=1 SV=2	NADH:flavin oxidoreductase / NADH oxidase family
BnaA02T0223600WE	0.247889	0.244304	-1.30673	0.00769883	-0.556672	0.0155537	--	U6 snRNA-associated Sm-like protein LSm3; K12622 U6 snRNA-associated Sm-like protein LSm3 (A)	Sm-like protein LSM3B OS=Arabidopsis thaliana GN=LSM3B PE=1 SV=1	LSM domain
BnaA02T0225600WE	-0.0621182	0.315311	-0.392879	0.00793996	-1.16061	0.000486165	GO:0016491	1-aminocyclopropane-1-carboxylate oxidase 5; K05933 aminocyclopropanecarboxylate oxidase [EC:1.14.17.4] (A)	1-aminocyclopropane-1-carboxylate oxidase 5 OS=Arabidopsis thaliana GN=At1g77330 PE=2 SV=1	2OG-Fe(II) oxygenase superfamily
BnaA02T0232900WE	-0.165212	0.0296239	0.306524	0.0226578	0.592239	0.0116833	GO:0003824	gamma-glutamyl hydrolase 1; K01307 gamma-glutamyl hydrolase [EC:3.4.19.9] (A)	Gamma-glutamyl hydrolase 1 OS=Arabidopsis thaliana GN=GGH1 PE=2 SV=1	Peptidase C26
BnaA02T0237800WE	0.0636918	0.319254	-0.663739	0.00167658	-1.58103	0.0170947	GO:0016620	glyceraldehyde-3-phosphate dehydrogenase GAPCP1, chloroplastic-like; K00134 glyceraldehyde 3-phosphate dehydrogenase [EC:1.2.1.12] (A)	Glyceraldehyde-3-phosphate dehydrogenase GAPCP2, chloroplastic OS=Arabidopsis thaliana GN=GAPCP2 PE=2 SV=1	Glyceraldehyde 3-phosphate dehydrogenase, NAD binding domain
BnaA02T0243200WE	0.0493845	0.26507	0.678839	0.181549	1.12452	0.00265771	GO:0016021	transmembrane protein 120A; K14574 ribosome maturation protein SDO1 (A)	Transmembrane protein 120B OS=Bos taurus GN=TMEM120B PE=2 SV=1	TMPIT-like protein
BnaA02T0244200WE	0.233004	0.0975129	-0.14339	0.366696	-0.677849	0.038257	GO:0004550	nucleoside diphosphate kinase III, chloroplastic/mitochondrial-like; K00940 nucleoside-diphosphate kinase [EC:2.7.4.6] (A)	Nucleoside diphosphate kinase III, chloroplastic/mitochondrial OS=Arabidopsis thaliana GN=NDPK3 PE=1 SV=1	Nucleoside diphosphate kinase
BnaA02T0251000WE	-0.307747	0.108227	0.699309	0.0015037	1.22906	0.0203445	GO:0005507	monocopper oxidase-like protein SKS1; K19791 iron transport multicopper oxidase (A)	Monocopper oxidase-like protein SKU5 OS=Arabidopsis thaliana GN=SKU5 PE=1 SV=1	Multicopper oxidase
BnaA02T0256700WE	-0.119108	0.0776611	-0.496463	0.0443385	-0.582048	0.00179649	GO:0005515	GST1; glutathione S-transferase; K00799 glutathione S-transferase [EC:2.5.1.18] (A)	Glutathione S-transferase F3 OS=Arabidopsis thaliana GN=GSTF3 PE=2 SV=1	Glutathione S-transferase, C-terminal domain
BnaA02T0258700WE	-0.577595	0.0222765	-0.236557	0.373006	0.644829	0.0302516	GO:0000145	exocyst complex component SEC15B-like; K19985 exocyst complex component 6 (A)	Exocyst complex component SEC15B OS=Arabidopsis thaliana GN=SEC15B PE=1 SV=1	Exocyst complex subunit Sec15-like
BnaA02T0261200WE	-0.296908	0.240559	-0.137377	0.255378	1.5452	0.00417338	GO:0008152	UDP-glycosyltransferase 72B1-like; K08237 hydroquinone glucosyltransferase [EC:2.4.1.218] (A)	UDP-glycosyltransferase 72B1 OS=Arabidopsis thaliana GN=UGT72B1 PE=1 SV=1	UDP-glucoronosyl and UDP-glucosyl transferase
BnaA02T0264500WE	0.513716	0.150264	0.715832	0.181303	-0.959869	0.0121244	--	probable 26S proteasome complex subunit sem1-2; K10881 26 proteasome complex subunit DSS1 (A)	Probable 26S proteasome complex subunit sem1-2 OS=Arabidopsis thaliana GN=At5g45010 PE=1 SV=1	DSS1/SEM1 family
BnaA02T0267200WE	0.0470575	0.372355	0.0466391	0.310966	0.815936	0.00567395	GO:0016491	gibberellin 20-oxidase; K05282 gibberellin 20-oxidase [EC:1.14.11.12] (A)	Probable 2-oxoglutarate-dependent dioxygenase AOP1.2 OS=Arabidopsis thaliana GN=AOP1.2 PE=2 SV=1	non-haem dioxygenase in morphine synthesis N-terminal
BnaA02T0267600WE	-0.200702	0.162965	0.0762598	0.0473309	0.782413	0.00641444	GO:0009058	katanin p60 ATPase-containing subunit A1-like; K07767 katanin p60 ATPase-containing subunit A1 [EC:3.6.4.3] (A)	Aspartate aminotransferase OS=Aquifex aeolicus (strain VF5) GN=aspC PE=3 SV=1	Aminotransferase class I and II
BnaA02T0270500WE	0.166473	0.327928	0.433503	0.131484	0.722424	0.0138977	GO:0005515	rae1-like protein At1g80670; K14298 mRNA export factor (A)	Protein RAE1 OS=Arabidopsis thaliana GN=RAE1 PE=1 SV=2	WD domain, G-beta repeat
BnaA02T0285300WE	0.301	0.0587363	0.682339	0.0314957	1.69063	0.00303541	--	ubiquitin carboxyl-terminal hydrolase 9-like; K11855 ubiquitin carboxyl-terminal hydrolase 36/42 [EC:3.4.19.12] (A)	CASP-like protein 1B1 OS=Arabidopsis thaliana GN=At5g44550 PE=1 SV=1	Domain of unknown function (DUF588)
BnaA02T0304300WE	-0.0559801	0.287154	-0.419673	0.0408517	-0.620675	0.0190866	--	suppressor protein STM1; K13199 plasminogen activator inhibitor 1 RNA-binding protein (A)	--	Stm1
BnaA02T0307700WE	-0.0832041	0.199386	0.314046	0.0140741	0.632239	0.00597445	--	putative MO25-like protein At5g47540; K08272 calcium binding protein 39 (A)	Putative MO25-like protein At5g47540 OS=Arabidopsis thaliana GN=At5g47540 PE=2 SV=1	Mo25-like
BnaA02T0308000WE	0.0638321	0.0920278	-0.598096	0.0506717	0.529902	0.0392631	GO:0003676	RNA-binding protein Musashi homolog Rbp6-like; K14411 RNA-binding protein Musashi (A)	NADH dehydrogenase [ubiquinone] 1 beta subcomplex subunit 8, mitochondrial OS=Arabidopsis thaliana GN=At5g47570 PE=2 SV=1	RNA recognition motif. (a.k.a. RRM, RBD, or RNP domain)
BnaA02T0308600WE	-0.0600763	0.261992	0.771171	0.00461274	1.06449	0.0103659	GO:0005515	sister chromatid cohesion protein PDS5 homolog A-like; K11267 sister chromatid cohesion protein PDS5 (A)	Protein C2-DOMAIN ABA-RELATED 11 OS=Arabidopsis thaliana GN=CAR11 PE=2 SV=1	C2 domain
BnaA02T0323000WE	-0.62058	0.0767716	0.509675	0.00631873	0.976633	0.00626495	GO:0005515	protein gar2; K14411 RNA-binding protein Musashi (A)	Protein IQ-DOMAIN 31 OS=Arabidopsis thaliana GN=IQD31 PE=1 SV=1	IQ calmodulin-binding motif
BnaA02T0323500WE	-0.386621	0.0650181	-0.194729	0.311719	2.37899	0.0171169	GO:0005507	--	Basic blue protein OS=Arabidopsis thaliana GN=ARPN PE=2 SV=2	Plastocyanin-like domain
BnaA02T0333700WE	0.0982686	0.295478	0.522635	0.00618932	0.972617	0.000638499	GO:0005506	CYP71B34; K00517 [EC:1.14.-.-] (A)	Cytochrome P450 71B37 OS=Arabidopsis thaliana GN=CYP71B37 PE=3 SV=2	Cytochrome P450
BnaA02T0344000WE	-0.252998	0.0210059	0.75748	0.0261024	0.653258	0.0221778	GO:0003682	uncharacterized LOC103854215; K09422 myb proto-oncogene protein, plant (A)	Transcription factor MYB98 OS=Arabidopsis thaliana GN=MYB98 PE=2 SV=1	Myb-like DNA-binding domain
BnaA02T0357700WE	0.15622	0.204797	0.223357	0.0667993	0.871207	0.024345	GO:0000786	hypothetical protein; K11253 histone H3 (A)	Histone H3.2 OS=Nicotiana tabacum GN=B34 PE=1 SV=1	Core histone H2A/H2B/H3/H4
BnaA02T0367000WE	0.0627518	0.317445	-0.153753	0.106927	-0.686998	0.01335	GO:0003735	bifunctional L-3-cyanoalanine synthase/cysteine synthase D2; K01738 cysteine synthase A [EC:2.5.1.47] (A)	Bifunctional L-3-cyanoalanine synthase/cysteine synthase D2 OS=Arabidopsis thaliana GN=CYSD2 PE=1 SV=1	Ribosomal protein S24e
BnaA02T0377400WE	-0.26144	0.124293	-0.1125	0.186645	0.503244	0.00312341	--	hypothetical protein; K14552 NET1-associated nuclear protein 1 (U3 small nucleolar RNA-associated protein 17) (A)	--	--
BnaA02T0379700WE	-0.0680617	0.386267	0.45412	0.0290661	0.617695	0.0380523	GO:0008270	alcohol dehydrogenase-like 6; K00001 alcohol dehydrogenase [EC:1.1.1.1] (A)	Alcohol dehydrogenase-like 6 OS=Arabidopsis thaliana GN=At5g24760 PE=2 SV=2	Zinc-binding dehydrogenase
BnaA02T0384600WE	-1.42088	0.0765826	0.747338	0.00557703	2.018	0.0370189	GO:0004185	serine carboxypeptidase-like 34; K16297 serine carboxypeptidase-like clade II [EC:3.4.16.-] (A)	Serine carboxypeptidase-like 34 OS=Arabidopsis thaliana GN=SCPL34 PE=2 SV=2	Serine carboxypeptidase
BnaA02T0386400WE	0.151857	0.341944	-0.147231	0.370662	0.828231	0.0388468	GO:0003676	ras GTPase-activating protein-binding protein 1; K17265 Ras GTPase-activating protein-binding protein 1 [EC:3.6.4.12 3.6.4.13] (A)	Putative G3BP-like protein OS=Schizosaccharomyces pombe (strain 972 / ATCC 24843) GN=nxt3 PE=1 SV=1	-
BnaA02T0387100WE	-0.044142	0.379305	-0.810536	0.0397482	1.26487	0.0232098	--	glucan endo-1,3-beta-glucosidase 3; K19891 glucan endo-1,3-beta-glucosidase 1/2/3 [EC:3.2.1.39] (A)	PLASMODESMATA CALLOSE-BINDING PROTEIN 1 OS=Arabidopsis thaliana GN=PDCB1 PE=1 SV=1	X8 domain
BnaA02T0390200WE	0.514451	0.0145886	-0.982425	0.00300507	-0.836867	0.00550383	--	pus4; tRNA pseudouridine synthase mitochondrial precursor; K01855 tRNA pseudouridine38/39 synthase [EC:5.4.99.45] (A)	Protein DCL, chloroplastic OS=Solanum lycopersicum GN=DCL PE=2 SV=1	Protein of unknown function (DUF3223)
BnaA02T0391800WE	-2.86497	0.0113059	0.571715	0.360726	1.72488	0.0256035	GO:0000166	ATPase 11, plasma membrane-type; K01535 H+-transporting ATPase [EC:3.6.3.6] (A)	ATPase 11, plasma membrane-type OS=Arabidopsis thaliana GN=AHA11 PE=1 SV=1	Cation transporter/ATPase, N-terminus
BnaA02T0401700WE	0.11319	0.00928738	-0.00705736	0.297871	0.534277	0.00951042	GO:0005509	POPTRDRAFT_654779; annexin-like protein RJ4; K17095 annexin A7/11 (A)	Annexin D2 OS=Arabidopsis thaliana GN=ANN2 PE=1 SV=1	Annexin
BnaA02T0410300WE	-0.448777	0.0178777	0.204562	0.106306	0.743871	0.00927429	GO:0005515	hypothetical protein; K00276 primary-amine oxidase [EC:1.4.3.21] (A)	Importin subunit alpha-1 OS=Mus musculus GN=Kpna2 PE=1 SV=2	Armadillo/beta-catenin-like repeat
BnaA03T0002400WE	-0.0153528	0.174578	0.313808	0.0017065	0.517762	0.00888873	GO:0016491	probable monodehydroascorbate reductase, cytoplasmic isoform 4; K08232 monodehydroascorbate reductase (NADH) [EC:1.6.5.4] (A)	Probable monodehydroascorbate reductase, cytoplasmic isoform 4 OS=Arabidopsis thaliana GN=At5g03630 PE=2 SV=1	Pyridine nucleotide-disulphide oxidoreductase
BnaA03T0002900WE	-0.142493	0.137937	0.416261	0.0800014	1.23367	0.00416514	--	glucomannan 4-beta-mannosyltransferase 9-like; K13680 beta-mannan synthase [EC:2.4.1.32] (A)	Glucomannan 4-beta-mannosyltransferase 9 OS=Arabidopsis thaliana GN=CSLA9 PE=2 SV=1	Glycosyltransferase like family 2
BnaA03T0004300WE	-0.646648	0.00447992	-0.428576	0.212994	-1.50763	0.00368826	GO:0003735	40S ribosomal protein S17-2-like; K02962 small subunit ribosomal protein S17e (A)	40S ribosomal protein S17-2 OS=Arabidopsis thaliana GN=RPS17B PE=2 SV=3	Ribosomal S17
BnaA03T0004900WE	0.703922	0.072365	0.39602	0.0276008	0.993549	0.00794359	--	heat shock family protein; K13993 HSP20 family protein (A)	Inactive protein RESTRICTED TEV MOVEMENT 2 OS=Arabidopsis thaliana GN=RTM2 PE=3 SV=1	Hsp20/alpha crystallin family
BnaA03T0005200WE	0.529823	0.131887	0.401724	0.0454454	0.732767	0.0402651	GO:0005515	histone-lysine N-methyltransferase, H3 lysine-9 specific SUVH1-like; K11420 euchromatic histone-lysine N-methyltransferase [EC:2.1.1.43] (A)	Histone-lysine N-methyltransferase, H3 lysine-9 specific SUVH1 OS=Arabidopsis thaliana GN=SUVH1 PE=2 SV=1	Pre-SET motif
BnaA03T0008600WE	0.104523	0.051343	-0.304202	0.0909925	-0.833477	0.00402348	GO:0006520	glutamate dehydrogenase 2-like; K00261 glutamate dehydrogenase (NAD(P)+) [EC:1.4.1.3] (A)	Glutamate dehydrogenase 2 OS=Arabidopsis thaliana GN=GDH2 PE=1 SV=1	Glu/Leu/Phe/Val dehydrogenase, dimerisation domain
BnaA03T0011500WE	0.249002	0.0624986	-0.16922	0.259252	1.80612	0.0131336	GO:0006826	Fer1; ferritin-1, chloroplastic; K00522 ferritin heavy chain [EC:1.16.3.2] (A)	Ferritin-1, chloroplastic OS=Brassica napus GN=LSC30 PE=2 SV=1	Ferritin-like domain
BnaA03T0017600WE	-0.230214	0.135402	-0.189788	0.0987513	-0.701108	0.00251609	GO:0003735	60S ribosomal protein L4-1-like; K02930 large subunit ribosomal protein L4e (A)	60S ribosomal protein L4-1 OS=Arabidopsis thaliana GN=RPL4A PE=2 SV=1	60S ribosomal protein L4 C-terminal domain
BnaA03T0027800WE	0.321434	0.148054	0.38982	0.0929652	1.96065	0.0197412	--	uncharacterized aarF domain-containing protein kinase At5g05200, chloroplastic; K08869 aarF domain-containing kinase (A)	Uncharacterized aarF domain-containing protein kinase At5g05200, chloroplastic OS=Arabidopsis thaliana GN=At5g05200 PE=2 SV=1	ABC1 family
BnaA03T0028400WE	-0.394798	0.115835	-0.277343	0.147514	-0.523672	0.0440758	GO:0005737	cytosolic endo-beta-N-acetylglucosaminidase; K01227 mannosyl-glycoprotein endo-beta-N-acetylglucosaminidase [EC:3.2.1.96] (A)	Cytosolic endo-beta-N-acetylglucosaminidase 1 OS=Arabidopsis thaliana GN=ENGASE1 PE=1 SV=1	Glycosyl hydrolase family 85
BnaA03T0029200WE	0.185321	0.0653117	-0.0771047	0.287585	-0.755469	0.00471102	GO:0009058	anthranilate synthase alpha subunit 1, chloroplastic; K01657 anthranilate synthase component I [EC:4.1.3.27] (A)	Anthranilate synthase alpha subunit 1, chloroplastic OS=Arabidopsis thaliana GN=ASA1 PE=1 SV=1	Anthranilate synthase component I, N terminal region
BnaA03T0029500WE	0.711443	0.0487263	-0.00390757	0.344598	-1.11258	0.0166366	GO:0005515	26S proteasome non-ATPase regulatory subunit 7 homolog A; K03038 26S proteasome regulatory subunit N8 (A)	26S proteasome non-ATPase regulatory subunit 7 homolog A OS=Arabidopsis thaliana GN=RPN8A PE=1 SV=1	JAB1/Mov34/MPN/PAD-1 ubiquitin protease
BnaA03T0030500WE	-0.0799588	0.26094	-0.400507	0.0291261	-0.680627	0.00268367	--	dnaJ homolog subfamily C member 2-like; K09522 DnaJ homolog subfamily C member 2 (A)	DnaJ homolog subfamily C member 2 OS=Rattus norvegicus GN=Dnajc2 PE=2 SV=1	DnaJ domain
BnaA03T0037800WE	-0.718623	0.021212	-0.537208	0.0833266	0.77412	0.0251354	--	hypothetical protein; K07466 replication factor A1 (A)	--	--
BnaA03T0038000WE	0.0951108	0.139161	-0.178547	0.0772219	0.633135	0.0307947	GO:0005515	syntaxin-132; K08486 syntaxin 1B/2/3 (A)	Syntaxin-132 OS=Arabidopsis thaliana GN=SYP132 PE=1 SV=1	Syntaxin
BnaA03T0043100WE	-0.804335	0.121962	-0.158914	0.259808	1.13949	0.0128026	GO:0003735	40S ribosomal protein S15-3-like; K02958 small subunit ribosomal protein S15e (A)	40S ribosomal protein S15-3 OS=Arabidopsis thaliana GN=RPS15C PE=2 SV=1	Ribosomal protein S19
BnaA03T0043300WE	-0.338656	0.244655	0.0425276	0.36735	0.732944	0.00756937	--	heat shock 70 kDa protein 10, mitochondrial-like; K03283 heat shock 70kDa protein 1/8 (A)	Heat shock 70 kDa protein 10, mitochondrial OS=Arabidopsis thaliana GN=HSP70-10 PE=2 SV=1	Hsp70 protein
BnaA03T0048400WE	-0.480785	0.0234992	0.649519	0.00748301	1.58079	0.00749047	GO:0004553	alpha-galactosidase; K07407 alpha-galactosidase [EC:3.2.1.22] (A)	Alpha-galactosidase 1 OS=Arabidopsis thaliana GN=AGAL1 PE=2 SV=1	Melibiase
BnaA03T0049200WE	0.0302904	0.229707	0.161815	0.0836933	0.774361	0.0159678	--	uncharacterized LOC103856368; K04460 serine/threonine-protein phosphatase 5 [EC:3.1.3.16] (A)	Transcriptional regulatory protein rxt3 OS=Schizosaccharomyces pombe (strain 972 / ATCC 24843) GN=rxt3 PE=1 SV=1	Histone deacetylation protein Rxt3
BnaA03T0057700WE	0.216016	0.186834	-0.0778822	0.226202	0.872328	0.0296997	--	--	--	--
BnaA03T0058900WE	0.0968351	0.085287	0.0543457	0.341095	-0.690302	0.00407964	GO:0003824	diaminopimelate decarboxylase 2, chloroplastic; K01586 diaminopimelate decarboxylase [EC:4.1.1.20] (A)	Diaminopimelate decarboxylase 2, chloroplastic OS=Arabidopsis thaliana GN=LYSA2 PE=2 SV=1	Pyridoxal-dependent decarboxylase, C-terminal sheet domain
BnaA03T0061000WE	0.669629	0.0614789	0.594109	0.0381999	1.08474	0.0327642	--	nuclear control of ATPase protein 2; K18158 nuclear control of ATPase protein 2 (A)	Nuclear control of ATPase protein 2 OS=Dictyostelium discoideum GN=nca2 PE=3 SV=1	ATP synthase regulation protein NCA2
BnaA03T0070300WE	0.137353	0.0677897	-0.11821	0.273488	-1.04939	0.00977937	GO:0004345	glucose-6-phosphate 1-dehydrogenase 2, chloroplastic-like; K00036 glucose-6-phosphate 1-dehydrogenase [EC:1.1.1.49 1.1.1.363] (A)	Glucose-6-phosphate 1-dehydrogenase 2, chloroplastic OS=Arabidopsis thaliana GN=At5g13110 PE=2 SV=2	Glucose-6-phosphate dehydrogenase, NAD binding domain
BnaA03T0070400WE	0.0861923	0.303376	-0.365682	0.116337	-0.612497	0.0105489	GO:0003755	photosynthetic NDH subunit of lumenal location 5, chloroplastic; K03768 peptidyl-prolyl cis-trans isomerase B (cyclophilin B) [EC:5.2.1.8] (A)	Photosynthetic NDH subunit of lumenal location 5, chloroplastic OS=Arabidopsis thaliana GN=PNSL5 PE=1 SV=1	Cyclophilin type peptidyl-prolyl cis-trans isomerase/CLD
BnaA03T0075200WE	0.263495	0.0102496	0.459545	0.258035	-0.553101	0.00821674	GO:0008152	aspartokinase 2, chloroplastic; K00928 aspartate kinase [EC:2.7.2.4] (A)	Aspartokinase 2, chloroplastic OS=Arabidopsis thaliana GN=AK2 PE=1 SV=2	ACT domain
BnaA03T0079200WE	-1.0204	0.0437724	0.290287	0.128746	1.02377	0.00882049	GO:0004806	protein EDS1L-like; K18875 enhanced disease susceptibility 1 protein (A)	Senescence-associated carboxylesterase 101 OS=Arabidopsis thaliana GN=SAG101 PE=1 SV=1	Lipase (class 3)
BnaA03T0081000WE	-0.489078	0.0533409	0.237554	0.0302647	1.13493	0.00614974	GO:0003723	KH domain-containing protein At4g18375-like; K13162 poly(rC)-binding protein 2/3/4 (A)	KH domain-containing protein At4g18375 OS=Arabidopsis thaliana GN=At4g18375 PE=2 SV=1	KH domain
BnaA03T0084800WE	-0.135842	0.195072	0.0795137	0.32161	-0.891201	0.0294961	GO:0003735	40S ribosomal protein S7-3; K02993 small subunit ribosomal protein S7e (A)	40S ribosomal protein S7-3 OS=Arabidopsis thaliana GN=RPS7C PE=1 SV=2	Ribosomal protein S7e
BnaA03T0089900WE	-0.211166	0.00243969	-0.223418	0.289734	-1.27665	0.0214517	GO:0008152	UTP--glucose-1-phosphate uridylyltransferase 1; K00963 UTP--glucose-1-phosphate uridylyltransferase [EC:2.7.7.9] (A)	UTP--glucose-1-phosphate uridylyltransferase 1 OS=Arabidopsis thaliana GN=At5g17310 PE=2 SV=1	UTP--glucose-1-phosphate uridylyltransferase
BnaA03T0090200WE	-0.346508	0.0303266	1.2633	0.117714	1.1306	0.014921	GO:0000226	gamma-tubulin complex component 2; K16569 gamma-tubulin complex component 2 (A)	Gamma-tubulin complex component 2 OS=Arabidopsis thaliana GN=GCP2 PE=1 SV=1	Spc97 / Spc98 family
BnaA03T0091900WE	-0.168163	0.296675	0.156642	0.121503	1.44661	0.0138179	--	--	--	--
BnaA03T0093400WE	0.171486	0.195474	-0.427536	0.0455839	-0.743865	0.0103853	GO:0005737	--	Anamorsin homolog OS=Arabidopsis thaliana GN=At5g18400 PE=1 SV=1	Cytokine-induced anti-apoptosis inhibitor 1, Fe-S biogenesis
BnaA03T0096500WE	0.0169034	0.0787789	0.742771	0.00629245	1.90405	0.020515	--	--	--	AWPM-19-like family
BnaA03T0099800WE	-0.0393732	0.268043	0.0787796	0.362897	0.867413	0.00601085	GO:0003924	tubulin alpha chain-like; K07374 tubulin alpha (A)	Tubulin alpha-5 chain OS=Arabidopsis thaliana GN=TUBA5 PE=1 SV=2	Tubulin/FtsZ family, GTPase domain
BnaA03T0101500WE	-0.0749419	0.38629	-0.156692	0.33047	-0.640926	0.0208554	GO:0016787	acyl-protein thioesterase 2; K06130 lysophospholipase II [EC:3.1.1.5] (A)	Acyl-protein thioesterase 2 OS=Homo sapiens GN=LYPLA2 PE=1 SV=1	Phospholipase/Carboxylesterase
BnaA03T0105500WE	-0.0409305	0.28279	-0.393528	0.229124	-1.72851	0.021402	GO:0005985	sucrose synthase 1-like; K00695 sucrose synthase [EC:2.4.1.13] (A)	Sucrose synthase 1 OS=Arabidopsis thaliana GN=SUS1 PE=1 SV=3	Glycosyl transferases group 1
BnaA03T0110700WE	1.31627	0.155997	1.67225	0.083077	1.04094	0.0356592	--	glucomannan 4-beta-mannosyltransferase 2-like; K13680 beta-mannan synthase [EC:2.4.1.32] (A)	Glucomannan 4-beta-mannosyltransferase 2 OS=Arabidopsis thaliana GN=CSLA2 PE=2 SV=1	Glycosyltransferase like family 2
BnaA03T0111300WE	0.22366	0.331484	0.451922	0.102603	0.93681	0.0298091	GO:0000786	histone H2B.10-like; K11252 histone H2B (A)	Histone H2B OS=Nicotiana tabacum GN=HIS2B PE=2 SV=3	Core histone H2A/H2B/H3/H4
BnaA03T0120800WE	-0.180098	0.30129	0.0370141	0.36906	-0.829205	0.013649	GO:0008430	--	SelT-like protein OS=Arabidopsis thaliana GN=At3g47300 PE=2 SV=2	Rdx family
BnaA03T0123100WE	-0.408189	0.128955	-0.375054	0.32509	0.519013	0.0169061	GO:0005515	histone-binding protein MSI1; K10752 histone-binding protein RBBP4 (A)	Histone-binding protein MSI1 OS=Arabidopsis thaliana GN=MSI1 PE=1 SV=1	WD domain, G-beta repeat
BnaA03T0125800WE	-0.547011	0.349865	0.459041	0.00891647	2.108	0.00569705	--	--	--	BNR repeat-like domain
BnaA03T0131700WE	0.0660412	0.109578	-0.36379	0.108598	-0.923622	0.0174374	GO:0000287	probable pyruvate kinase, cytosolic isozyme; K00873 pyruvate kinase [EC:2.7.1.40] (A)	Probable pyruvate kinase, cytosolic isozyme OS=Arabidopsis thaliana GN=At4g26390 PE=3 SV=1	Pyruvate kinase, alpha/beta domain
BnaA03T0145200WE	0.184637	0.0725509	-0.372927	0.161793	-2.09332	0.00147728	GO:0006537	glutamate synthase 1 [NADH], chloroplastic; K00264 glutamate synthase (NADPH/NADH) [EC:1.4.1.13 1.4.1.14] (A)	Glutamate synthase 1 [NADH], chloroplastic OS=Arabidopsis thaliana GN=GLT1 PE=2 SV=2	Pyridine nucleotide-disulphide oxidoreductase
BnaA03T0156200WE	-0.167846	0.078081	0.0399369	0.204822	0.62414	0.0281949	GO:0000166	clpA; chaperone protein ClpC1, chloroplastic; K03696 ATP-dependent Clp protease ATP-binding subunit ClpC (A)	Chaperone protein ClpC1, chloroplastic OS=Arabidopsis thaliana GN=CLPC1 PE=1 SV=1	UvrB/uvrC motif
BnaA03T0158600WE	0.50183	0.0495331	0.185436	0.367208	-0.648218	0.0404651	--	mitochondrial import inner membrane translocase subunit TIM8; K17780 mitochondrial import inner membrane translocase subunit TIM8 (A)	Mitochondrial import inner membrane translocase subunit TIM8 OS=Arabidopsis thaliana GN=TIM8 PE=1 SV=1	Tim10/DDP family zinc finger
BnaA03T0159500WE	0.237125	0.275636	0.886215	0.00908292	1.68107	0.00251505	GO:0016491	internal alternative NAD(P)H-ubiquinone oxidoreductase A2, mitochondrial; K17871 NADH:ubiquinone reductase (non-electrogenic) [EC:1.6.5.9] (A)	Internal alternative NAD(P)H-ubiquinone oxidoreductase A2, mitochondrial OS=Arabidopsis thaliana GN=NDA2 PE=2 SV=1	Pyridine nucleotide-disulphide oxidoreductase
BnaA03T0159600WE	0.226225	0.278788	0.00356337	0.312895	0.662934	0.0210055	--	PHD finger-like domain-containing protein 5B; K12834 PHD finger-like domain-containing protein 5A (A)	PHD finger-like domain-containing protein 5B OS=Arabidopsis thaliana GN=At1g07170 PE=2 SV=1	PHF5-like protein
BnaA03T0164100WE	0.481375	0.0339546	-0.234933	0.0787891	-0.828362	0.00121471	GO:0005515	glutathione S-transferase F9; K00799 glutathione S-transferase [EC:2.5.1.18] (A)	Glutathione S-transferase F9 OS=Arabidopsis thaliana GN=GSTF9 PE=1 SV=1	Glutathione S-transferase, N-terminal domain
BnaA03T0165100WE	-0.523612	0.0294663	-0.0950594	0.230041	-0.6427	0.0244178	GO:0003924	GTP-binding protein TypA/BipA homolog; K06207 GTP-binding protein (A)	GTP-binding protein TypA/BipA homolog OS=Helicobacter pylori (strain ATCC 700392 / 26695) GN=typA PE=3 SV=1	Elongation factor Tu domain 2
BnaA03T0166500WE	-0.130285	0.0443991	-0.369456	0.0866608	-1.265	0.0034358	GO:0004747	probable fructokinase-1; K00847 fructokinase [EC:2.7.1.4] (A)	Probable fructokinase-1 OS=Arabidopsis thaliana GN=At2g31390 PE=2 SV=1	pfkB family carbohydrate kinase
BnaA03T0167800WE	0.059059	0.21254	-0.510078	0.0279041	-0.770643	0.0167015	GO:0004602	probable glutathione peroxidase 2; K00432 glutathione peroxidase [EC:1.11.1.9] (A)	Probable glutathione peroxidase 2 OS=Arabidopsis thaliana GN=GPX2 PE=1 SV=1	Glutathione peroxidase
BnaA03T0169200WE	-0.270964	0.173407	0.634784	0.00918016	1.56167	0.00135601	GO:0003774	myosin-12-like; K10357 myosin V (A)	Myosin-12 OS=Arabidopsis thaliana GN=XI-F PE=2 SV=1	Myosin N-terminal SH3-like domain
BnaA03T0180600WE	-0.0181104	0.382732	0.911107	0.0114565	1.58755	0.00598644	GO:0005515	hypothetical protein; K17550 protein phosphatase 1 regulatory subunit 7 (A)	187-kDa microtubule-associated protein AIR9 OS=Arabidopsis thaliana GN=AIR9 PE=1 SV=1	Leucine Rich repeats (2 copies)
BnaA03T0180800WE	-0.0412194	0.218693	-0.280681	0.199088	0.561518	0.00150933	GO:0005737	pleckstrin homology domain-containing family A member 8-like; K08051 pleckstrin homology domain containing, family A (phosphoinositide binding specific) member 8 (A)	Accelerated cell death 11 OS=Arabidopsis thaliana GN=ACD11 PE=1 SV=1	Glycolipid transfer protein (GLTP)
BnaA03T0181600WE	1.9085	0.142068	0.604369	0.0280046	-0.833507	0.0449331	GO:0005198	coatomer subunit epsilon-2; K17268 coatomer protein complex, subunit epsilon (A)	Coatomer subunit epsilon-2 OS=Arabidopsis thaliana GN=At2g34840 PE=2 SV=1	Coatomer epsilon subunit
BnaA03T0189000WE	0.0840836	0.106824	-0.415517	0.108543	1.47623	0.0196765	--	ankyrin repeat domain-containing protein 30A; K19748 RAB6-interacting golgin (A)	--	Transcriptional activator
BnaA03T0192100WE	0.156893	0.0744951	-0.106444	0.330952	0.720001	0.00418146	GO:0005215	aquaporin PIP2-2-like; K09872 aquaporin PIP (A)	Aquaporin PIP2-2 OS=Arabidopsis thaliana GN=PIP2-2 PE=1 SV=2	Major intrinsic protein
BnaA03T0192700WE	-0.48729	0.032693	-0.304627	0.0173916	-0.985979	0.00216849	GO:0003676	RNA-binding protein CP29B, chloroplastic-like; K11294 nucleolin (A)	RNA-binding protein CP29B, chloroplastic OS=Arabidopsis thaliana GN=CP29B PE=1 SV=1	RNA recognition motif. (a.k.a. RRM, RBD, or RNP domain)
BnaA03T0199000WE	0.0340285	0.324125	-0.519291	0.0119744	0.5665	0.0195974	GO:0004601	peroxidase 22-like; K00430 peroxidase [EC:1.11.1.7] (A)	Peroxidase 22 OS=Arabidopsis thaliana GN=PER22 PE=1 SV=2	Peroxidase
BnaA03T0202700WE	0.210813	0.143113	-1.06007	0.0167506	-1.17224	0.00304144	GO:0003924	atln-2; ATLastiN (endoplasmic reticulum GTPase) related; K17339 atlastin [EC:3.6.5.-] (A)	Guanylate-binding protein 4 OS=Homo sapiens GN=GBP4 PE=2 SV=2	Guanylate-binding protein, C-terminal domain
BnaA03T0203900WE	0.268287	0.110723	-0.086676	0.179493	-0.761402	0.000825108	GO:0008080	hypothetical protein; K00657 diamine N-acetyltransferase [EC:2.3.1.57] (A)	Probable acetyltransferase NATA1-like OS=Arabidopsis thaliana GN=At2g39020 PE=2 SV=1	Acetyltransferase (GNAT) family
BnaA03T0204100WE	-0.325789	0.381653	1.2679	0.231976	0.764175	0.0162068	GO:0003676	chromatin structure-remodeling complex protein SYD-like; K11786 ATP-dependent helicase STH1/SNF2 [EC:3.6.4.-] (A)	Chromatin structure-remodeling complex protein SYD OS=Arabidopsis thaliana GN=SYD PE=1 SV=1	Helicase conserved C-terminal domain
BnaA03T0204200WE	-0.685951	0.0111057	-0.576541	0.00528138	0.566686	0.00643115	--	hypothetical protein; K17600 vacuolar protein sorting-associated protein 54 (A)	--	Ricin-type beta-trefoil lectin domain-like
BnaA03T0208900WE	0.0979952	0.356361	-0.815998	0.0076757	-0.794974	0.00342122	GO:0005515	eukaryotic translation initiation factor 3 subunit F; K03249 translation initiation factor 3 subunit F (A)	Eukaryotic translation initiation factor 3 subunit F OS=Arabidopsis thaliana GN=TIF3F1 PE=1 SV=1	Maintenance of mitochondrial structure and function
BnaA03T0215400WE	0.0200328	0.341842	0.399634	0.0289032	0.674965	0.0104917	GO:0006537	ferredoxin-dependent glutamate synthase 2, chloroplastic-like; K00284 glutamate synthase (ferredoxin) [EC:1.4.7.1] (A)	Ferredoxin-dependent glutamate synthase 2, chloroplastic OS=Arabidopsis thaliana GN=GLU2 PE=1 SV=2	GXGXG motif
BnaA03T0217000WE	-0.609253	0.0593904	0.0422297	0.0940349	1.45636	0.000592394	GO:0004367	glycerol-3-phosphate dehydrogenase [NAD(+)] GPDHC1, cytosolic; K00006 glycerol-3-phosphate dehydrogenase (NAD+) [EC:1.1.1.8] (A)	Glycerol-3-phosphate dehydrogenase [NAD(+)] GPDHC1, cytosolic OS=Arabidopsis thaliana GN=GPDHC1 PE=2 SV=1	NAD-dependent glycerol-3-phosphate dehydrogenase N-terminus
BnaA03T0226100WE	-0.25249	0.0307824	-0.707108	0.0464392	-1.89306	0.0122018	GO:0006631	acyl-[acyl-carrier-protein] desaturase, chloroplastic (EC:1.14.19.2); K03921 acyl-[acyl-carrier-protein] desaturase [EC:1.14.19.2 1.14.19.11 1.14.19.26] (A)	Acyl-[acyl-carrier-protein] desaturase, chloroplastic OS=Brassica napus PE=2 SV=1	Fatty acid desaturase
BnaA03T0227500WE	2.95795	0.224645	0.29479	0.164162	1.11429	0.00602922	GO:0003735	rpl2, CiarC_p059; ribosomal protein L2; K02886 large subunit ribosomal protein L2 (A)	60S ribosomal protein L2, mitochondrial OS=Oryza sativa subsp. japonica GN=RPL2 PE=2 SV=2	Ribosomal Proteins L2, C-terminal domain
BnaA03T0234800WE	0.025941	0.214257	0.00567239	0.325213	0.720689	0.0151606	GO:0005215	aquaporin PIP1-2-like; K09872 aquaporin PIP (A)	Aquaporin PIP1-2 OS=Arabidopsis thaliana GN=PIP1-2 PE=1 SV=1	Major intrinsic protein
BnaA03T0235400WE	0.0290735	0.216871	-0.0979034	0.200599	-0.841314	0.00235878	--	39S ribosomal protein L46, mitochondrial-like; K17427 large subunit ribosomal protein L46 (A)	39S ribosomal protein L46, mitochondrial OS=Pongo abelii GN=MRPL46 PE=2 SV=1	39S mitochondrial ribosomal protein L46
BnaA03T0240300WE	0.0938238	0.31935	-0.185403	0.120548	0.705936	0.00354054	GO:0005515	glutathione S-transferase F8, chloroplastic-like; K00799 glutathione S-transferase [EC:2.5.1.18] (A)	Glutathione S-transferase F8, chloroplastic OS=Arabidopsis thaliana GN=GSTF8 PE=1 SV=3	Glutathione S-transferase, C-terminal domain
BnaA03T0241300WE	0.179585	0.163946	0.659347	0.0232605	0.916163	0.00250727	GO:0005515	anthocyanidin 3-O-glucosyltransferase 2; K08237 hydroquinone glucosyltransferase [EC:2.4.1.218] (A)	UDP-glycosyltransferase 71D1 OS=Arabidopsis thaliana GN=UGT71D1 PE=2 SV=1	PH domain
BnaA03T0248600WE	0.626147	0.330717	0.555787	0.0775439	0.529104	0.0235395	GO:0005215	nucleobase-ascorbate transporter 3-like; K14611 solute carrier family 23 (nucleobase transporter), member 1/2 (A)	Nucleobase-ascorbate transporter 3 OS=Arabidopsis thaliana GN=NAT3 PE=2 SV=2	Permease family
BnaA03T0249800WE	-1.89182	0.0785863	0.856718	0.0541977	0.694156	0.0289887	GO:0004190	--	Basic 7S globulin OS=Glycine max GN=BG PE=1 SV=2	Xylanase inhibitor N-terminal
BnaA03T0253600WE	-0.485961	0.168115	0.29136	0.160082	0.650031	0.0334757	GO:0004553	endoglucanase 25-like; K08472 mlo protein (A)	Endoglucanase 25 OS=Arabidopsis thaliana GN=KOR PE=1 SV=1	Glycosyl hydrolase family 9
BnaA03T0255400WE	0.143331	0.20347	0.0869179	0.342481	1.0612	0.0058705	--	manganese-dependent ADP-ribose/CDP-alcohol diphosphatase; K01517 manganese-dependent ADP-ribose/CDP-alcohol diphosphatase [EC:3.6.1.13 3.6.1.16 3.6.1.53] (A)	High-affinity nitrate transporter 3.1 OS=Arabidopsis thaliana GN=NRT3.1 PE=1 SV=1	--
BnaA03T0259400WE	-0.327808	0.249711	0.0442979	0.149642	1.09789	0.00914226	--	--	--	--
BnaA03T0259800WE	1.5389	0.070302	-0.0136452	0.374558	1.20666	0.00747413	GO:0016813	arginase 1, mitochondrial; K01476 arginase [EC:3.5.3.1] (A)	Arginase 1, mitochondrial OS=Arabidopsis thaliana GN=ARGAH1 PE=2 SV=1	Arginase family
BnaA03T0262200WE	-0.103523	0.266496	-0.617895	0.0134824	-1.10541	0.00514019	GO:0004672	CPK4.2; calcium-dependent protein kinase 4 (EC:2.7.11.1); K13412 calcium-dependent protein kinase [EC:2.7.11.1] (A)	Calcium-dependent protein kinase 4 OS=Arabidopsis thaliana GN=CPK4 PE=1 SV=1	EF-hand domain pair
BnaA03T0266400WE	-0.268881	0.118156	0.562417	0.0158301	0.548874	0.00663784	GO:0009987	transcription elongation complex subunit (Cdc68) (EC:3.4.11.9); K01262 Xaa-Pro aminopeptidase [EC:3.4.11.9] (A)	FACT complex subunit SPT16 OS=Arabidopsis thaliana GN=SPT16 PE=1 SV=1	Histone chaperone Rttp106-like
BnaA03T0274900WE	0.351741	0.35448	-0.334599	0.113597	-0.645257	0.00808941	GO:0005515	U3 small nucleolar RNA-associated protein 21 homolog; K14554 U3 small nucleolar RNA-associated protein 21 (A)	U3 small nucleolar RNA-associated protein 21 homolog OS=Schizosaccharomyces pombe (strain 972 / ATCC 24843) GN=SPCC1672.07 PE=3 SV=1	WD domain, G-beta repeat
BnaA03T0280700WE	-0.579036	0.034457	-0.656872	0.06649	1.44651	0.0147446	GO:0046983	POPTRDRAFT_662518; hypothetical protein; K12126 phytochrome-interacting factor 3 (A)	Transcription factor UNE12 OS=Arabidopsis thaliana GN=UNE12 PE=2 SV=2	Helix-loop-helix DNA-binding domain
BnaA03T0286400WE	-0.452225	0.0194104	-1.04217	0.00256988	-0.696336	0.00451762	GO:0003735	60S acidic ribosomal protein P1-2; K02942 large subunit ribosomal protein LP1 (A)	60S acidic ribosomal protein P1-2 OS=Arabidopsis thaliana GN=RPP1B PE=1 SV=2	60s Acidic ribosomal protein
BnaA03T0289500WE	0.585109	0.287027	0.560509	0.0172625	1.59623	0.0124056	GO:0005515	rasa4; RAS p21 protein activator 4; K17630 Ras GTPase-activating protein 4 (A)	Protein QUIRKY OS=Arabidopsis thaliana GN=QKY PE=2 SV=1	C2 domain
BnaA03T0292800WE	0.192737	0.146011	0.901202	0.0190008	1.51005	0.00159538	--	uncharacterized LOC103421379; K17609 nucleoredoxin [EC:1.8.1.8] (A)	Protein SIEVE ELEMENT OCCLUSION A OS=Arabidopsis thaliana GN=SEOA PE=1 SV=1	Sieve element occlusion N-terminus
BnaA03T0294000WE	0.0749906	0.343407	-0.383495	0.0235785	0.858557	0.00499769	GO:0015992	V-type proton ATPase subunit G1-like; K02152 V-type H+-transporting ATPase subunit G (A)	V-type proton ATPase subunit G1 OS=Arabidopsis thaliana GN=VHA-G1 PE=2 SV=1	Vacuolar (H+)-ATPase G subunit
BnaA03T0302400WE	0.205681	0.00501079	0.193563	0.0336258	0.508762	0.0033638	GO:0003871	5-methyltetrahydropteroyltriglutamate--homocysteine methyltransferase 2; K00549 5-methyltetrahydropteroyltriglutamate--homocysteine methyltransferase [EC:2.1.1.14] (A)	5-methyltetrahydropteroyltriglutamate--homocysteine methyltransferase 2 OS=Arabidopsis thaliana GN=MS2 PE=1 SV=1	Cobalamin-independent synthase, N-terminal domain
BnaA03T0303200WE	-0.0890069	0.157247	-0.88496	0.0410854	-0.504586	0.0124591	GO:0016620	glyceraldehyde-3-phosphate dehydrogenase, cytosolic-like; K00134 glyceraldehyde 3-phosphate dehydrogenase [EC:1.2.1.12] (A)	Glyceraldehyde-3-phosphate dehydrogenase, cytosolic OS=Sinapis alba GN=GAPC PE=2 SV=2	Glyceraldehyde 3-phosphate dehydrogenase, NAD binding domain
BnaA03T0304100WE	0.0615009	0.0514534	-0.574889	0.0117128	-0.603122	0.0140631	GO:0003735	hypothetical protein; K02894 large subunit ribosomal protein L23e (A)	Histone-lysine N-methyltransferase SUVR4 OS=Arabidopsis thaliana GN=SUVR4 PE=1 SV=2	Ubiquitin-binding WIYLD domain
BnaA03T0305800WE	-0.145506	0.220237	-0.610552	0.0136548	-0.535733	0.0107488	GO:0005515	ANKK1; ankyrin repeat and kinase domain containing 1; K16289 ankyrin repeat and protein kinase domain-containing protein 1 [EC:2.7.11.1] (A)	Ankyrin repeat and protein kinase domain-containing protein 1 OS=Homo sapiens GN=ANKK1 PE=2 SV=1	Tetratricopeptide repeat
BnaA03T0306200WE	-0.340618	0.194187	-0.32248	0.243561	-2.02909	0.0149517	GO:0008061	Chitinase / Hevein / PR-4 / Wheatwin2; K04730 interleukin-1 receptor-associated kinase 1 [EC:2.7.11.1] (A)	Hevein-like preproprotein OS=Arabidopsis thaliana GN=HEL PE=1 SV=1	Chitin recognition protein
BnaA03T0310400WE	-0.335781	0.294355	1.17831	0.114093	0.590877	0.0296793	--	--	--	--
BnaA03T0312100WE	-0.687797	0.0231211	0.255489	0.0503272	0.777863	0.0063666	GO:0003824	long chain acyl-CoA synthetase 6, peroxisomal; K01897 long-chain acyl-CoA synthetase [EC:6.2.1.3] (A)	Long chain acyl-CoA synthetase 6, peroxisomal OS=Arabidopsis thaliana GN=LACS6 PE=1 SV=1	AMP-binding enzyme
BnaA03T0315400WE	-1.03754	0.0349713	0.419233	0.353004	1.05	0.00955253	--	serine/threonine-protein phosphatase 4 regulatory subunit 3-like; K17491 protein phosphatase 4 regulatory subunit 3 (A)	Serine/threonine-protein phosphatase 4 regulatory subunit 3 OS=Danio rerio GN=smek1 PE=1 SV=1	Component of IIS longevity pathway SMK-1
BnaA03T0316300WE	0.267796	0.146733	-0.361981	0.0438224	0.565452	0.00199766	GO:0008152	lipoamide acyltransferase component of branched-chain alpha-keto acid dehydrogenase complex, mitochondrial-like; K09699 2-oxoisovalerate dehydrogenase E2 component (dihydrolipoyl transacylase) [EC:2.3.1.168] (A)	Lipoamide acyltransferase component of branched-chain alpha-keto acid dehydrogenase complex, mitochondrial OS=Arabidopsis thaliana GN=BCE2 PE=1 SV=1	e3 binding domain
BnaA03T0319400WE	1.2292	0.0253837	-1.44842	0.115937	0.535576	0.0452735	--	--	Auxin-induced in root cultures protein 12 OS=Arabidopsis thaliana GN=AIR12 PE=1 SV=3	Protein of unknown function (DUF568)
BnaA03T0328800WE	-0.100294	0.291217	0.0468108	0.336568	-0.987283	0.00598594	GO:0006662	ubiquitin-conjugating enzyme E2 11; K06689 ubiquitin-conjugating enzyme E2 D/E [EC:2.3.2.23] (A)	Ubiquitin-conjugating enzyme E2 11 OS=Arabidopsis thaliana GN=UBC11 PE=1 SV=2	Thioredoxin
BnaA03T0334300WE	0.136115	0.0435373	-0.104844	0.16611	-0.608266	0.00379706	GO:0003676	eukaryotic translation initiation factor 3 subunit G-like; K03248 translation initiation factor 3 subunit G (A)	Eukaryotic translation initiation factor 3 subunit G OS=Xenopus tropicalis GN=eif3g PE=2 SV=1	RNA recognition motif. (a.k.a. RRM, RBD, or RNP domain)
BnaA03T0336400WE	-1.00216	0.018744	0.0343111	0.288173	0.601005	0.0277592	--	hypothetical protein; K15455 diphthamide biosynthesis protein 3 (A)	--	--
BnaA03T0336500WE	-0.303776	0.0694286	0.437337	0.185305	1.45515	0.00395138	GO:0005515	syntaxin-121; K08486 syntaxin 1B/2/3 (A)	Syntaxin-121 OS=Arabidopsis thaliana GN=SYP121 PE=1 SV=1	Syntaxin
BnaA03T0336900WE	0.364126	0.0187074	-0.468641	0.0304468	-0.899978	0.00434405	GO:0004221	ubiquitin carboxyl-terminal hydrolase 13-like; K11838 ubiquitin carboxyl-terminal hydrolase 7 [EC:3.4.19.12] (A)	Ubiquitin carboxyl-terminal hydrolase 13 OS=Arabidopsis thaliana GN=UBP13 PE=1 SV=1	MATH domain
BnaA03T0340300WE	-0.637904	0.0435412	0.452349	0.256389	0.774449	0.038498	GO:0003676	hypothetical protein; K14396 polyadenylate-binding protein 2 (A)	Polyadenylate-binding protein 2-B OS=Xenopus laevis GN=pabpn1-b PE=2 SV=1	PWI domain
BnaA03T0344800WE	0.0887039	0.304278	-0.130432	0.284573	-0.785405	0.00304531	--	uncharacterized LOC105790132; K20102 YTH domain-containing family protein (A)	YTH domain-containing family protein 2 OS=Mus musculus GN=Ythdf2 PE=2 SV=1	YT521-B-like domain
BnaA03T0346200WE	-0.143694	0.0260791	0.669829	0.0306045	1.05838	0.0201535	GO:0016021	transmembrane 9 superfamily member 7-like; K17086 transmembrane 9 superfamily member 2/4 (A)	Transmembrane 9 superfamily member 7 OS=Arabidopsis thaliana GN=TMN7 PE=2 SV=1	Endomembrane protein 70
BnaA03T0357500WE	-0.0253105	0.368882	-0.176709	0.187308	-0.877212	0.00587988	GO:0005215	aquaporin TIP2-1-like; K09873 aquaporin TIP (A)	Aquaporin TIP2-1 OS=Arabidopsis thaliana GN=TIP2-1 PE=1 SV=2	Major intrinsic protein
BnaA03T0358200WE	0.331216	0.176587	0.243944	0.219392	0.630854	0.0404606	--	disease resistance protein RPM1-like; K13457 disease resistance protein RPM1 (A)	PYK10-binding protein 2 OS=Arabidopsis thaliana GN=PBP2 PE=1 SV=1	Jacalin-like lectin domain
BnaA03T0358700WE	-0.311582	0.102901	0.829496	0.055419	1.18518	0.0243192	--	--	Rapid alkalinization factor 23 OS=Arabidopsis thaliana GN=RALF23 PE=1 SV=1	Rapid ALkalinization Factor (RALF)
BnaA03T0358900WE	0.102436	0.0878907	-0.643104	0.00277117	-0.577675	0.00221625	--	--	Translationally-controlled tumor protein homolog OS=Brassica oleracea GN=TCTP PE=2 SV=1	Translationally controlled tumour protein
BnaA03T0367100WE	-0.0422935	0.223698	0.278777	0.0299748	0.872611	0.00723389	GO:0003924	ras-related protein RABG3f-like; K07897 Ras-related protein Rab-7A (A)	Ras-related protein RABG3f OS=Arabidopsis thaliana GN=RABG3F PE=2 SV=1	Ras family
BnaA03T0376600WE	0.147653	0.0841748	0.279012	0.121389	-1.08202	0.00221809	GO:0008565	uncharacterized LOC103859879; K12275 translocation protein SEC62 (A)	Translocation protein sec62 OS=Schizosaccharomyces pombe (strain 972 / ATCC 24843) GN=sec62 PE=3 SV=1	Translocation protein Sec62
BnaA03T0377900WE	0.0903974	0.0320232	0.107553	0.179962	0.649921	0.00587584	GO:0003824	4-coumarate--CoA ligase 4; K01904 4-coumarate--CoA ligase [EC:6.2.1.12] (A)	4-coumarate--CoA ligase 4 OS=Arabidopsis thaliana GN=4CL4 PE=1 SV=1	AMP-binding enzyme C-terminal domain
BnaA03T0382700WE	-0.197877	0.0283384	0.0364402	0.336481	2.62674	0.00898574	GO:0009916	ubiquinol oxidase 1a, mitochondrial-like; K17893 ubiquinol oxidase [EC:1.10.3.11] (A)	Ubiquinol oxidase 1a, mitochondrial OS=Arabidopsis thaliana GN=AOX1A PE=1 SV=2	Alternative oxidase
BnaA03T0385300WE	0.721576	0.0306858	-0.0962225	0.157489	-1.32559	0.0110984	GO:0004781	ATP sulfurylase 1, chloroplastic; K13811 3'-phosphoadenosine 5'-phosphosulfate synthase [EC:2.7.7.4 2.7.1.25] (A)	ATP sulfurylase 1, chloroplastic OS=Arabidopsis thaliana GN=APS1 PE=1 SV=1	PUA-like domain
BnaA03T0387400WE	-0.155151	0.230022	-0.0755193	0.375198	0.997645	0.0449268	GO:0008610	hypothetical protein; K00574 cyclopropane-fatty-acyl-phospholipid synthase [EC:2.1.1.79] (A)	Tuberculostearic acid methyltransferase UfaA1 OS=Mycobacterium tuberculosis (strain ATCC 25618 / H37Rv) GN=ufaA1 PE=1 SV=3	NAD(P)-binding Rossmann-like domain
BnaA03T0390000WE	-0.334646	0.085015	0.479358	0.167676	2.19824	0.0129147	GO:0008519	putative ammonium transporter 1 member 5; K03320 ammonium transporter, Amt family (A)	Putative ammonium transporter 1 member 5 OS=Arabidopsis thaliana GN=AMT1-5 PE=3 SV=1	Ammonium Transporter Family
BnaA03T0393400WE	-0.328742	0.188033	0.193909	0.241466	0.745625	0.0409489	--	RPM1-interacting protein 4; K13456 RPM1-interacting protein 4 (A)	RPM1-interacting protein 4 OS=Arabidopsis thaliana GN=RIN4 PE=1 SV=1	Cleavage site for pathogenic type III effector avirulence factor Avr
BnaA03T0394100WE	-0.227895	0.10567	-0.441071	0.139978	-0.772837	0.00629733	GO:0006457	peptidyl-prolyl cis-trans isomerase FKBP15-1; K09569 FK506-binding protein 2 [EC:5.2.1.8] (A)	Peptidyl-prolyl cis-trans isomerase FKBP15-1 OS=Arabidopsis thaliana GN=FKBP15-1 PE=2 SV=2	FKBP-type peptidyl-prolyl cis-trans isomerase
BnaA03T0395000WE	-0.0686545	0.209758	0.043882	0.308935	-0.82069	0.0143051	GO:0003735	60S ribosomal protein L5-1; K02932 large subunit ribosomal protein L5e (A)	60S ribosomal protein L5-1 OS=Arabidopsis thaliana GN=ATL5 PE=2 SV=2	Ribosomal L18 C-terminal region
BnaA03T0395300WE	-0.708951	0.11045	-0.448731	0.166967	1.23043	0.0348488	GO:0004252	peptidase, putative (EC:3.4.21.25); K18443 golgi-specific brefeldin A-resistance guanine nucleotide exchange factor 1 (A)	Subtilisin-like protease SBT5.3 OS=Arabidopsis thaliana GN=AIR3 PE=2 SV=1	PA domain
BnaA03T0396100WE	0.0711352	0.193399	-0.405224	0.0232131	-0.83861	0.00687563	GO:0003723	eukaryotic translation initiation factor 1A-like; K03236 translation initiation factor 1A (A)	Eukaryotic translation initiation factor 1A OS=Onobrychis viciifolia PE=2 SV=2	Translation initiation factor 1A / IF-1
BnaA03T0396800WE	-0.330431	0.0656204	-0.145929	0.134815	0.966696	0.00821116	--	serine/threonine-protein phosphatase 2A 65 kDa regulatory subunit A beta isoform-like; K03456 serine/threonine-protein phosphatase 2A regulatory subunit A (A)	Fasciclin-like arabinogalactan protein 7 OS=Arabidopsis thaliana GN=FLA7 PE=1 SV=1	Fasciclin domain
BnaA03T0400200WE	-0.492954	0.00388977	-0.122551	0.215539	0.900857	0.0168467	GO:0005515	RNA polymerase-associated protein CTR9 homolog; K15176 RNA polymerase-associated protein CTR9 (A)	Protein CTR9 homolog OS=Arabidopsis thaliana GN=VIP6 PE=1 SV=1	Tetratricopeptide repeat
BnaA03T0407800WE	-0.621533	0.0342446	0.164801	0.205278	-0.602881	0.0313609	--	40S ribosomal protein S25-3; K02975 small subunit ribosomal protein S25e (A)	40S ribosomal protein S25-3 OS=Arabidopsis thaliana GN=RPS25D PE=3 SV=2	S25 ribosomal protein
BnaA03T0408200WE	0.200986	0.345684	0.0287966	0.18436	0.829249	0.00616499	GO:0000166	DNA replication licensing factor MCM4; K02212 DNA replication licensing factor MCM4 [EC:3.6.4.12] (A)	DNA replication licensing factor MCM4 OS=Arabidopsis thaliana GN=MCM4 PE=1 SV=1	MCM N-terminal domain
BnaA03T0416200WE	0.0450048	0.109933	-0.432269	0.0117932	-1.15307	0.00119047	GO:0003676	glycine-rich RNA-binding protein 3, mitochondrial-like; K12741 heterogeneous nuclear ribonucleoprotein A1/A3 (A)	Glycine-rich RNA-binding protein 3, mitochondrial OS=Arabidopsis thaliana GN=RBG3 PE=2 SV=1	RNA recognition motif. (a.k.a. RRM, RBD, or RNP domain)
BnaA03T0417300WE	0.0762529	0.185171	0.118412	0.0865278	0.683775	0.00336019	--	Leucine-rich repeat protein kinase family protein, putative; K13420 LRR receptor-like serine/threonine-protein kinase FLS2 [EC:2.7.11.1] (A)	Leucine-rich repeat receptor protein kinase MSP1 OS=Oryza sativa subsp. japonica GN=MSP1 PE=1 SV=1	Leucine rich repeat N-terminal domain
BnaA03T0422700WE	-0.0017465	0.150387	0.114402	0.122092	1.18129	0.00647859	GO:0005525	ADP-ribosylation factor-like protein 8A; K07955 ADP-ribosylation factor-like protein 8 (A)	ADP-ribosylation factor-like protein 8A OS=Xenopus tropicalis GN=arl8a PE=2 SV=1	ADP-ribosylation factor family
BnaA03T0427600WE	-0.429787	0.117237	0.234886	0.157847	0.597226	0.0312214	GO:0003700	GATA transcription factor 8-like; K17894 GATA-binding protein 2 (A)	GATA transcription factor 6 OS=Arabidopsis thaliana GN=GATA6 PE=2 SV=1	GATA zinc finger
BnaA03T0448500WE	0.0579315	0.146463	0.275617	0.135801	-1.02953	0.00422368	GO:0004221	ubiquitin carboxyl-terminal hydrolase isozyme L3-like; K05609 ubiquitin carboxyl-terminal hydrolase L3 [EC:3.4.19.12] (A)	Ubiquitin carboxyl-terminal hydrolase isozyme L3 OS=Bos taurus GN=UCHL3 PE=2 SV=1	Ubiquitin carboxyl-terminal hydrolase, family 1
BnaA03T0450200WE	-0.813228	0.0945303	0.213327	0.208379	0.788903	0.0412565	GO:0003824	alpha,alpha-trehalose-phosphate synthase [UDP-forming] 5; K16055 trehalose 6-phosphate synthase/phosphatase [EC:2.4.1.15 3.1.3.12] (A)	Alpha,alpha-trehalose-phosphate synthase [UDP-forming] 5 OS=Arabidopsis thaliana GN=TPS5 PE=1 SV=2	Trehalose-phosphatase
BnaA03T0463000WE	0.104747	0.371183	-1.37037	0.025816	-0.635901	0.0250522	--	--	--	--
BnaA03T0467600WE	-0.414092	0.0361917	1.1082	0.0389746	1.05712	0.0389675	GO:0004143	sphingosine kinase 1; K04718 sphingosine kinase [EC:2.7.1.91] (A)	Sphingosine kinase 1 OS=Arabidopsis thaliana GN=SPHK1 PE=1 SV=1	Diacylglycerol kinase catalytic domain
BnaA03T0474800WE	-0.216478	0.325353	-0.347375	0.383069	1.44036	0.0128932	GO:0003677	--	AT-hook motif nuclear-localized protein 2 OS=Arabidopsis thaliana GN=AHL2 PE=2 SV=1	AT hook motif
BnaA03T0475100WE	0.190321	0.188203	-0.26671	0.116682	0.514857	0.0340376	--	--	AT-hook motif nuclear-localized protein 24 OS=Arabidopsis thaliana GN=AHL24 PE=2 SV=1	Domain of unknown function (DUF296)
BnaA03T0476000WE	-0.436255	0.0416193	0.0439039	0.337463	-0.897842	0.00426331	GO:0016787	dihydroorotase, mitochondrial; K01465 dihydroorotase [EC:3.5.2.3] (A)	Dihydroorotase, mitochondrial OS=Arabidopsis thaliana GN=PYR4 PE=2 SV=1	Amidohydrolase family
BnaA03T0479500WE	-0.13762	0.257756	-0.506718	0.0946472	-1.57649	0.011038	GO:0009058	cystine lyase CORI3-like; K00815 tyrosine aminotransferase [EC:2.6.1.5] (A)	Probable aminotransferase TAT4 OS=Arabidopsis thaliana GN=At4g23590 PE=2 SV=1	Aminotransferase class I and II
BnaA03T0480700WE	-0.275048	0.0885804	0.512466	0.00147285	1.33663	0.0122418	--	hypothetical protein; K19027 zinc finger FYVE domain-containing protein 26 (A)	Dirigent protein 6 OS=Arabidopsis thaliana GN=DIR6 PE=1 SV=1	Dirigent-like protein
BnaA03T0483600WE	0.158875	0.262122	-0.462028	0.284077	1.45729	0.00497976	--	--	--	Protein of unknown function, DUF538
BnaA03T0486700WE	0.262584	0.0139038	-0.382086	0.0143795	-1.47224	0.00052137	GO:0004347	glucose-6-phosphate isomerase 1, chloroplastic; K01810 glucose-6-phosphate isomerase [EC:5.3.1.9] (A)	Glucose-6-phosphate isomerase 1, chloroplastic OS=Arabidopsis thaliana GN=PGI1 PE=1 SV=1	Phosphoglucose isomerase
BnaA03T0490700WE	-0.20526	0.214013	0.123746	0.355637	1.04779	0.00349078	--	--	AT-hook motif nuclear-localized protein 3 OS=Arabidopsis thaliana GN=AHL3 PE=1 SV=1	Domain of unknown function (DUF296)
BnaA03T0497200WE	-0.409492	0.0451395	-0.301441	0.230417	-1.0409	0.00274147	GO:0000166	arginine--tRNA ligase, cytoplasmic-like; K01887 arginyl-tRNA synthetase [EC:6.1.1.19] (A)	Arginine--tRNA ligase, chloroplastic/mitochondrial OS=Arabidopsis thaliana GN=EMB1027 PE=3 SV=1	Arginyl tRNA synthetase N terminal domain
BnaA03T0501100WE	-0.30005	0.049559	-0.258118	0.0599523	-0.84272	0.00942234	GO:0003676	polyadenylate-binding protein RBP45-like; K03231 elongation factor 1-alpha (A)	Polyadenylate-binding protein RBP45C OS=Arabidopsis thaliana GN=RBP45C PE=2 SV=1	RNA recognition motif. (a.k.a. RRM, RBD, or RNP domain)
BnaA03T0504300WE	0.424408	0.0589183	0.44461	0.155451	1.45042	0.0168042	GO:0005507	glutamine-rich protein 2-like; K19926 zona pellucida sperm-binding protein 1 (A)	Early nodulin-like protein 2 OS=Arabidopsis thaliana GN=At4g27520 PE=1 SV=1	Plastocyanin-like domain
BnaA03T0510300WE	-0.0691695	0.233023	0.31409	0.00550425	0.567843	0.0272266	GO:0003824	probable protein phosphatase 2C 58; K17506 protein phosphatase 1L [EC:3.1.3.16] (A)	Probable protein phosphatase 2C 58 OS=Arabidopsis thaliana GN=At4g28400 PE=2 SV=1	Protease inhibitor/seed storage/LTP family
BnaA03T0513800WE	-0.762698	0.0259819	-0.254786	0.195859	1.13879	0.0148403	--	extensin-like; K05747 Wiskott-Aldrich syndrome protein (A)	AFP homolog 2 OS=Arabidopsis thaliana GN=AFPH2 PE=1 SV=1	Ethylene-responsive binding factor-associated repression
BnaA03T0514000WE	0.283071	0.0963689	0.804159	0.0070649	1.28639	0.00767897	--	--	--	--
BnaA03T0516500WE	0.231772	0.23348	-0.0611622	0.303768	1.71465	0.0145092	GO:0003840	gamma-glutamyltranspeptidase 3-like; K18592 gamma-glutamyltranspeptidase / glutathione hydrolase / leukotriene-C4 hydrolase [EC:2.3.2.2 3.4.19.13 3.4.19.14] (A)	Gamma-glutamyltranspeptidase 3 OS=Arabidopsis thaliana GN=GGT3 PE=2 SV=1	Gamma-glutamyltranspeptidase
BnaA03T0517300WE	0.166709	0.077752	-0.339522	0.138686	-0.919038	0.00791219	GO:0003735	60S ribosomal protein L28-2-like; K02903 large subunit ribosomal protein L28e (A)	60S ribosomal protein L28-2 OS=Arabidopsis thaliana GN=RPL28C PE=2 SV=1	Ribosomal L28e protein family
BnaA03T0518900WE	0.123178	0.2469	0.713707	0.0503049	1.27966	0.0104008	GO:0016747	spermidine coumaroyl CoA acyltransferase-like; K15400 omega-hydroxypalmitate O-feruloyl transferase [EC:2.3.1.188] (A)	Spermidine coumaroyl CoA acyltransferase OS=Arabidopsis thaliana GN=SCT PE=1 SV=1	Transferase family
BnaA03T0520300WE	-0.0191405	0.0806527	0.117887	0.217679	0.5693	0.0322703	--	--	--	--
BnaA03T0521600WE	0.854367	0.0447405	-1.14378	0.0334122	-1.5354	0.0489334	GO:0004601	peroxidase 45; K00430 peroxidase [EC:1.11.1.7] (A)	Peroxidase 45 OS=Arabidopsis thaliana GN=PER45 PE=1 SV=1	Peroxidase
BnaA03T0521700WE	0.0828064	0.326193	1.7445	0.00410622	-1.29333	0.0265516	GO:0006812	ATPase 2, plasma membrane-type-like; K01535 H+-transporting ATPase [EC:3.6.3.6] (A)	ATPase 2, plasma membrane-type OS=Arabidopsis thaliana GN=AHA2 PE=1 SV=2	Cation transporter/ATPase, N-terminus
BnaA03T0522000WE	0.300519	0.039297	-0.234787	0.0606886	-0.598607	0.0100351	GO:0005506	NADPH--cytochrome P450 reductase 2-like; K00327 NADPH-ferrihemoprotein reductase [EC:1.6.2.4] (A)	NADPH--cytochrome P450 reductase 2 OS=Arabidopsis thaliana GN=ATR2 PE=1 SV=1	Oxidoreductase NAD-binding domain
BnaA03T0522900WE	-0.216066	0.136498	-0.119373	0.385109	0.581872	0.00622259	GO:0004553	probable xyloglucan endotransglucosylase/hydrolase protein 17; K08235 xyloglucan:xyloglucosyl transferase [EC:2.4.1.207] (A)	Xyloglucan endotransglucosylase/hydrolase protein 20 OS=Arabidopsis thaliana GN=XTH20 PE=2 SV=1	Xyloglucan endo-transglycosylase (XET) C-terminus
BnaA03T0534600WE	-0.288536	0.0893025	0.268645	0.167468	1.15661	0.00595834	--	sister chromatid cohesion protein PDS5 homolog A-A-like; K11267 sister chromatid cohesion protein PDS5 (A)	Sister chromatid cohesion protein PDS5 homolog B-B OS=Xenopus laevis GN=pds5b-b PE=2 SV=2	--
BnaA03T0534700WE	0.350711	0.247214	0.504233	0.0187505	2.26771	0.0341826	GO:0016747	omega-hydroxypalmitate O-feruloyl transferase-like; K15400 omega-hydroxypalmitate O-feruloyl transferase [EC:2.3.1.188] (A)	Omega-hydroxypalmitate O-feruloyl transferase OS=Arabidopsis thaliana GN=HHT1 PE=1 SV=1	Transferase family
BnaA03T0536700WE	-0.270411	0.194099	-0.140458	0.158041	0.837448	0.00444171	--	--	Protein WVD2-like 1 OS=Arabidopsis thaliana GN=WDL1 PE=1 SV=1	Targeting protein for Xklp2 (TPX2)
BnaA03T0536800WE	0.388425	0.0195479	0.379882	0.384886	0.516149	0.0316202	GO:0016020	CesA1.2; cellulose synthase A catalytic subunit 1 [UDP-forming]-like; K10999 cellulose synthase A [EC:2.4.1.12] (A)	Cellulose synthase A catalytic subunit 1 [UDP-forming] OS=Arabidopsis thaliana GN=CESA1 PE=1 SV=1	Zinc-binding RING-finger
BnaA03T0538000WE	-0.250939	0.369444	0.512787	0.0781425	0.651518	0.0234334	GO:0015078	V-type proton ATPase subunit c''2; K03661 V-type H+-transporting ATPase 21kDa proteolipid subunit (A)	V-type proton ATPase subunit c''1 OS=Arabidopsis thaliana GN=VHA-c''1 PE=1 SV=1	ATP synthase subunit C
BnaA03T0543000WE	-1.48743	0.0870723	0.701065	0.0238884	1.05911	0.0185536	--	--	--	--
BnaA03T0545100WE	0.464746	0.00773551	-0.108842	0.251927	-1.4125	0.00266798	GO:0003735	40S ribosomal protein S29-like; K02980 small subunit ribosomal protein S29e (A)	40S ribosomal protein S29 OS=Arabidopsis thaliana GN=RPS29A PE=3 SV=2	Ribosomal protein S14p/S29e
BnaA03T0547300WE	0.213306	0.00402361	-0.3508	0.109664	0.736081	0.0105599	GO:0008171	caffeoyl-CoA O-methyltransferase 1; K00588 caffeoyl-CoA O-methyltransferase [EC:2.1.1.104] (A)	Caffeoyl-CoA O-methyltransferase 1 OS=Arabidopsis thaliana GN=CCOAOMT1 PE=1 SV=1	O-methyltransferase
BnaA03T0548900WE	-0.33958	0.0544545	0.318315	0.0185165	0.928571	0.00156698	GO:0008270	cinnamyl alcohol dehydrogenase 5; K00083 cinnamyl-alcohol dehydrogenase [EC:1.1.1.195] (A)	Cinnamyl alcohol dehydrogenase 5 OS=Arabidopsis thaliana GN=CAD5 PE=1 SV=1	Zinc-binding dehydrogenase
BnaA03T0551900WE	-0.583591	0.0549293	-0.69813	0.0107453	0.568892	0.0344248	--	NADH dehydrogenase [ubiquinone] 1 beta subcomplex subunit 9; K03965 NADH dehydrogenase (ubiquinone) 1 beta subcomplex subunit 9 (A)	NADH dehydrogenase [ubiquinone] 1 beta subcomplex subunit 9 OS=Arabidopsis thaliana GN=CIB22 PE=1 SV=1	Complex 1 protein (LYR family)
BnaA03T0558000WE	0.0899981	0.251551	0.596519	0.00914804	1.85837	0.00535928	GO:0003824	phospholipase D delta-like; K01115 phospholipase D1/2 [EC:3.1.4.4] (A)	Phospholipase D delta OS=Arabidopsis thaliana GN=PLDDELTA PE=1 SV=2	Phospholipase D Active site motif
BnaA03T0559100WE	0.0474537	0.277071	0.388992	0.12476	-1.17885	0.00899304	GO:0003676	cold shock protein 1; K09250 cellular nucleic acid-binding protein (A)	Cold shock protein 1 OS=Arabidopsis thaliana GN=CSP1 PE=1 SV=1	'Cold-shock' DNA-binding domain
BnaA03T0561300WE	-0.396834	0.0324255	0.0631094	0.359129	0.672526	0.0264923	GO:0004601	peroxidase 49; K00430 peroxidase [EC:1.11.1.7] (A)	Peroxidase 49 OS=Arabidopsis thaliana GN=PER49 PE=2 SV=2	Peroxidase
BnaA03T0561400WE	-0.101421	0.273753	0.177704	0.196831	0.588538	0.0404256	GO:0004601	peroxidase 49; K00430 peroxidase [EC:1.11.1.7] (A)	Peroxidase 49 OS=Arabidopsis thaliana GN=PER49 PE=2 SV=2	Peroxidase
BnaA03T0562100WE	-0.624875	0.00231381	0.00990416	0.21028	0.710145	0.007344	GO:0005083	PLA2G4F; uncharacterized LOC100543562; K16342 cytosolic phospholipase A2 [EC:3.1.1.4] (A)	Vam6/Vps39-like protein OS=Mus musculus GN=Vps39 PE=2 SV=1	Region in Clathrin and VPS
BnaA03T0563500WE	-0.663434	0.0666989	-0.107971	0.32766	1.0524	0.00468464	GO:0010181	minor allergen Alt a 7; K03809 NAD(P)H dehydrogenase (quinone) [EC:1.6.5.2] (A)	Probable NAD(P)H dehydrogenase (quinone) FQR1-like 2 OS=Arabidopsis thaliana GN=At4g36750 PE=1 SV=1	NADPH-dependent FMN reductase
BnaA03T0565900WE	-0.166154	0.208249	0.327039	0.0189401	1.38853	0.00939045	--	hypothetical protein; K13110 microfibrillar-associated protein 1 (A)	PI-PLC X domain-containing protein At5g67130 OS=Arabidopsis thaliana GN=At5g67130 PE=1 SV=1	Phosphatidylinositol-specific phospholipase C, X domain
BnaA04T0001800WE	0.141817	0.319939	-0.348941	0.0889015	0.646743	0.014232	GO:0006412	ribosome-recycling factor, chloroplastic-like; K02838 ribosome recycling factor (A)	Ribosome-recycling factor, chloroplastic OS=Arabidopsis thaliana GN=RRF PE=2 SV=2	Ribosome recycling factor
BnaA04T0005200WE	-0.132826	0.30062	-0.575213	0.0555313	-0.677366	0.0188444	GO:0005515	glutathione S-transferase F13; K00799 glutathione S-transferase [EC:2.5.1.18] (A)	Glutathione S-transferase F13 OS=Arabidopsis thaliana GN=GSTF13 PE=3 SV=1	Glutathione S-transferase, N-terminal domain
BnaA04T0006400WE	0.832191	0.028233	-0.980825	0.0597715	-1.5975	0.0179573	GO:0003735	ubiquitin-40S ribosomal protein S27a-3; K02977 small subunit ribosomal protein S27Ae (A)	Ubiquitin-40S ribosomal protein S27a-3 OS=Arabidopsis thaliana GN=RPS27AC PE=1 SV=2	Ribosomal protein S27a
BnaA04T0012500WE	-0.325487	0.0718269	0.0241654	0.188479	0.76019	0.00186664	GO:0005086	brefeldin A-inhibited guanine nucleotide-exchange protein 2; K18442 brefeldin A-inhibited guanine nucleotide-exchange protein (A)	Brefeldin A-inhibited guanine nucleotide-exchange protein 2 OS=Arabidopsis thaliana GN=BIG2 PE=2 SV=1	Domain of unknown function (DUF1981)
BnaA04T0013200WE	-0.468938	0.0414064	-0.33854	0.168581	-0.798168	0.0181253	GO:0003824	transketolase-1, chloroplastic; K00615 transketolase [EC:2.2.1.1] (A)	Transketolase-1, chloroplastic OS=Arabidopsis thaliana GN=TKL-1 PE=1 SV=1	Transketolase, C-terminal domain
BnaA04T0016300WE	-0.379571	0.0621061	-2.03856	0.00239288	-0.968739	0.0398051	GO:0003735	hypothetical protein; K02921 large subunit ribosomal protein L37Ae (A)	60S ribosomal protein L37a-2 OS=Arabidopsis thaliana GN=RPL37AC PE=3 SV=1	Ribosomal L37ae protein family
BnaA04T0019500WE	0.488478	0.074403	0.891189	0.00616622	0.868269	0.00156148	GO:0003677	protein argonaute 4B-like; K11593 eukaryotic translation initiation factor 2C (A)	Zinc finger BED domain-containing protein DAYSLEEPER OS=Arabidopsis thaliana GN=HAT PE=1 SV=1	BED zinc finger
BnaA04T0020500WE	-0.0104966	0.0468437	-0.23656	0.218551	0.562064	0.0196427	--	pirin-1-like; K06911 uncharacterized protein (A)	Pirin-1 OS=Arabidopsis thaliana GN=PRN1 PE=1 SV=1	Pirin
BnaA04T0022600WE	0.339507	0.248593	-0.256447	0.267631	2.56446	0.0278232	--	--	Protein YLS3 OS=Arabidopsis thaliana GN=YLS3 PE=2 SV=1	Probable lipid transfer
BnaA04T0028800WE	0.0724609	0.114876	-0.297206	0.0301007	-0.582946	0.000752355	GO:0003743	eukaryotic translation initiation factor 3 subunit E-like; K03250 translation initiation factor 3 subunit E (A)	Eukaryotic translation initiation factor 3 subunit E OS=Nematostella vectensis GN=v1g163572 PE=3 SV=1	PCI domain
BnaA04T0029900WE	0.35809	0.0415171	0.635068	0.00625432	0.654618	0.00402003	GO:0009058	strictosidine synthase 1; K01757 strictosidine synthase [EC:4.3.3.2] (A)	Protein STRICTOSIDINE SYNTHASE-LIKE 8 OS=Arabidopsis thaliana GN=SSL8 PE=2 SV=1	Strictosidine synthase
BnaA04T0033700WE	-3.82251	0.00515471	2.52513	0.082482	3.16917	0.0467442	GO:0003735	40S ribosomal protein S26-3-like; K02976 small subunit ribosomal protein S26e (A)	40S ribosomal protein S26-2 OS=Arabidopsis thaliana GN=RPS26B PE=2 SV=2	Ribosomal protein S26e
BnaA04T0037500WE	0.15469	0.0565988	-0.471602	0.00631756	-0.840896	0.00199672	GO:0042256	eukaryotic translation initiation factor 6-2-like; K03264 translation initiation factor 6 (A)	Eukaryotic translation initiation factor 6-2 OS=Arabidopsis thaliana GN=EIF6-2 PE=2 SV=1	eIF-6 family
BnaA04T0038600WE	-0.178099	0.303412	-0.709626	0.330085	1.28544	0.0121596	GO:0003676	serine/arginine-rich SC35-like splicing factor SCL30; K12900 FUS-interacting serine-arginine-rich protein 1 (A)	Serine/arginine-rich SC35-like splicing factor SCL30 OS=Arabidopsis thaliana GN=SCL30 PE=1 SV=1	RNA recognition motif. (a.k.a. RRM, RBD, or RNP domain)
BnaA04T0040500WE	-0.158216	0.0201808	0.239025	0.00938578	1.18957	0.0188105	GO:0004553	beta-hexosaminidase 1-like; K12373 hexosaminidase [EC:3.2.1.52] (A)	Beta-hexosaminidase 1 OS=Arabidopsis thaliana GN=HEXO1 PE=1 SV=1	beta-acetyl hexosaminidase like
BnaA04T0045800WE	0.412394	0.180297	1.04711	0.00854228	1.63242	0.0179957	GO:0005986	hypothetical protein; K14514 ethylene-insensitive protein 3 (A)	Protein trichome birefringence-like 36 OS=Arabidopsis thaliana GN=TBL36 PE=2 SV=1	PMR5 N terminal Domain
BnaA04T0047800WE	-0.793671	0.0893566	1.17704	0.0279139	1.63668	0.0192125	GO:0004672	probable serine/threonine-protein kinase At5g41260; K14500 BR-signaling kinase [EC:2.7.11.1] (A)	Probable serine/threonine-protein kinase At5g41260 OS=Arabidopsis thaliana GN=At5g41260 PE=1 SV=1	TPR repeat
BnaA04T0048300WE	0.172001	0.153025	-0.569091	0.0041614	-1.0054	0.00227087	GO:0006950	--	Universal stress protein A-like protein OS=Arabidopsis thaliana GN=At3g01520 PE=1 SV=2	Universal stress protein family
BnaA04T0048400WE	-0.0406533	0.388342	0.335083	0.154379	2.85711	0.0211058	--	--	--	Probable lipid transfer
BnaA04T0049700WE	0.0895719	0.31966	-0.0949324	0.149944	0.577007	0.0257783	GO:0008060	probable ADP-ribosylation factor GTPase-activating protein AGD6; K12492 ADP-ribosylation factor GTPase-activating protein 1 (A)	Probable ADP-ribosylation factor GTPase-activating protein AGD6 OS=Arabidopsis thaliana GN=AGD6 PE=1 SV=1	Putative GTPase activating protein for Arf
BnaA04T0050000WE	-0.0389268	0.292957	0.372842	0.0205775	0.888781	0.0267757	GO:0000786	histone H2B.8-like; K11252 histone H2B (A)	Histone H2B.4 OS=Arabidopsis thaliana GN=At2g37470 PE=1 SV=3	Core histone H2A/H2B/H3/H4
BnaA04T0050200WE	-0.122201	0.341029	-0.371058	0.0953007	-0.99623	0.00995205	GO:0000287	soluble inorganic pyrophosphatase-like; K01507 inorganic pyrophosphatase [EC:3.6.1.1] (A)	Soluble inorganic pyrophosphatase 4 OS=Arabidopsis thaliana GN=PPA4 PE=1 SV=1	Inorganic pyrophosphatase
BnaA04T0052400WE	-0.926939	0.0311049	0.23693	0.0639479	1.65044	0.0228808	GO:0006629	hypothetical protein; K00679 phospholipid:diacylglycerol acyltransferase [EC:2.3.1.158] (A)	GDSL esterase/lipase At3g53100 OS=Arabidopsis thaliana GN=At3g53100 PE=2 SV=1	GDSL-like Lipase/Acylhydrolase
BnaA04T0058000WE	-0.1027	0.278836	-0.274682	0.0766326	1.06888	0.00404446	GO:0008060	probable ADP-ribosylation factor GTPase-activating protein AGD14; K15044 Arf-GAP domain and FG repeats-containing protein 1 (A)	Probable ADP-ribosylation factor GTPase-activating protein AGD14 OS=Arabidopsis thaliana GN=AGD14 PE=1 SV=2	Putative GTPase activating protein for Arf
BnaA04T0061300WE	0.0773075	0.156763	0.84803	0.00109988	1.11922	0.00388374	GO:0005506	cytochrome P450 83A1; K12156 cytochrome P450, family 83, subfamily A, polypeptide 1 [EC:1.14.-.-] (A)	Cytochrome P450 83A1 OS=Arabidopsis thaliana GN=CYP83A1 PE=1 SV=2	Cytochrome P450
BnaA04T0063600WE	0.0119871	0.325993	0.299271	0.0644528	-0.598267	0.0283829	--	COP9 signalosome complex subunit 8-like; K12181 COP9 signalosome complex subunit 8 (A)	COP9 signalosome complex subunit 8 OS=Arabidopsis thaliana GN=CSN8 PE=1 SV=1	CSN8/PSMD8/EIF3K family
BnaA04T0068000WE	0.507706	0.167196	-0.14255	0.229008	1.40697	0.0253307	--	hypothetical protein; K06934 uncharacterized protein (A)	AT-hook motif nuclear-localized protein 20 OS=Arabidopsis thaliana GN=AHL20 PE=2 SV=1	Domain of unknown function (DUF296)
BnaA04T0068800WE	0.0993283	0.260037	-0.256076	0.0374258	0.815058	0.0115243	GO:0005198	clathrin light chain 2-like; K04645 clathrin light chain B (A)	Clathrin light chain 3 OS=Arabidopsis thaliana GN=At3g51890 PE=1 SV=1	Clathrin light chain
BnaA04T0072300WE	-0.878025	0.0579305	-0.291363	0.0876097	1.31382	0.00866484	--	STAB2; stabilin 2; K19013 stabilin-2 (A)	Fasciclin-like arabinogalactan protein 15 OS=Arabidopsis thaliana GN=FLA15 PE=2 SV=1	Fasciclin domain
BnaA04T0073700WE	-0.681558	0.0820936	0.265774	0.0532103	1.03644	0.0247026	GO:0004190	Eukaryotic aspartyl protease family protein isoform 1; K00924 [EC:2.7.1.-] (A)	Aspartic proteinase nepenthesin-2 OS=Nepenthes gracilis GN=nep2 PE=1 SV=1	Xylanase inhibitor N-terminal
BnaA04T0075900WE	-0.0955306	0.024111	-0.704302	0.067141	-1.11489	0.00990748	GO:0004332	fructose-bisphosphate aldolase, cytoplasmic isozyme-like; K01623 fructose-bisphosphate aldolase, class I [EC:4.1.2.13] (A)	Fructose-bisphosphate aldolase, cytoplasmic isozyme 2 OS=Pisum sativum PE=3 SV=1	Fructose-bisphosphate aldolase class-I
BnaA04T0082000WE	0.0748118	0.21013	-0.331958	0.0817484	-1.16299	0.019372	GO:0003723	eukaryotic translation initiation factor 1A; K03236 translation initiation factor 1A (A)	Eukaryotic translation initiation factor 1A OS=Onobrychis viciifolia PE=2 SV=2	Translation initiation factor 1A / IF-1
BnaA04T0086600WE	-0.0926791	0.275759	0.166861	0.363362	-0.935707	0.0149152	--	microsomal glutathione S-transferase 3-like; K00799 glutathione S-transferase [EC:2.5.1.18] (A)	Microsomal glutathione S-transferase 3 OS=Mus musculus GN=Mgst3 PE=1 SV=1	MAPEG family
BnaA04T0086800WE	-0.238774	0.315311	0.392279	0.122847	0.70833	0.0442309	--	pre-mRNA-splicing factor 38B; K12850 pre-mRNA-splicing factor 38B (A)	Pre-mRNA-splicing factor 38B OS=Homo sapiens GN=PRPF38B PE=1 SV=1	Pre-mRNA-splicing factor 38-associated hydrophilic C-term
BnaA04T0090000WE	-0.0241917	0.127294	0.240624	0.13425	0.657125	0.00632591	GO:0003676	THO complex subunit 4D; K12881 THO complex subunit 4 (A)	THO complex subunit 4D OS=Arabidopsis thaliana GN=ALY4 PE=1 SV=1	-
BnaA04T0094400WE	0.116686	0.245681	-0.394823	0.153661	0.519565	0.0227676	GO:0003684	ubiquitin receptor RAD23d; K10839 UV excision repair protein RAD23 (A)	Ubiquitin receptor RAD23d OS=Arabidopsis thaliana GN=RAD23D PE=1 SV=2	Ubiquitin family
BnaA04T0099500WE	0.101452	0.334764	0.198378	0.0598805	0.934074	0.015322	GO:0003677	ABC transporter B family member 21-like; K05658 ATP-binding cassette, subfamily B (MDR/TAP), member 1 [EC:3.6.3.44] (A)	Zinc finger BED domain-containing protein DAYSLEEPER OS=Arabidopsis thaliana GN=HAT PE=1 SV=1	BED zinc finger
BnaA04T0101600WE	0.0505899	0.266664	-0.511975	0.119804	1.0222	0.0236835	GO:0006886	vesicle transport v-SNARE 11-like; K08493 vesicle transport through interaction with t-SNAREs 1 (A)	Vesicle transport v-SNARE 13 OS=Arabidopsis thaliana GN=VTI13 PE=2 SV=1	Snare region anchored in the vesicle membrane C-terminus
BnaA04T0109500WE	-0.0560391	0.292977	-1.12698	0.00421172	-0.984064	0.00480274	GO:0009055	glutaredoxin-C2; K03676 glutaredoxin 3 (A)	Glutaredoxin-C2 OS=Arabidopsis thaliana GN=GRXC2 PE=2 SV=1	Glutaredoxin
BnaA04T0110100WE	0.0443875	0.222929	0.899013	0.0075853	0.863544	0.00816465	--	probable galactinol--sucrose galactosyltransferase 5; K06617 raffinose synthase [EC:2.4.1.82] (A)	Probable galactinol--sucrose galactosyltransferase 5 OS=Arabidopsis thaliana GN=RFS5 PE=1 SV=1	Raffinose synthase or seed imbibition protein Sip1
BnaA04T0113500WE	0.129943	0.190529	0.326782	0.125917	1.56286	0.00693389	--	lysine histidine transporter-like 1; K14209 solute carrier family 36 (proton-coupled amino acid transporter) (A)	Lysine histidine transporter 1 OS=Arabidopsis thaliana GN=LHT1 PE=1 SV=1	Transmembrane amino acid transporter protein
BnaA04T0118900WE	0.354921	0.017472	-0.786604	0.0165002	-1.15398	0.00103539	--	40S ribosomal protein S10-2-like; K02947 small subunit ribosomal protein S10e (A)	40S ribosomal protein S10-2 OS=Arabidopsis thaliana GN=RPS10B PE=2 SV=1	Plectin/S10 domain
BnaA04T0120000WE	0.0111183	0.341383	-0.346534	0.0829781	-0.928133	0.00927896	GO:0004616	6-phosphogluconate dehydrogenase, decarboxylating 2, chloroplastic; K00033 6-phosphogluconate dehydrogenase [EC:1.1.1.44 1.1.1.343] (A)	6-phosphogluconate dehydrogenase, decarboxylating 2, chloroplastic OS=Arabidopsis thaliana GN=At5g41670 PE=1 SV=1	NAD binding domain of 6-phosphogluconate dehydrogenase
BnaA04T0136600WE	0.147167	0.23475	0.491367	0.0158631	1.55706	0.0111252	--	3-hydroxyacyl-[acyl-carrier-protein] dehydratase FabZ-like; K02372 3-hydroxyacyl-[acyl-carrier-protein] dehydratase [EC:4.2.1.59] (A)	3-hydroxyacyl-[acyl-carrier-protein] dehydratase FabZ OS=Thermosynechococcus elongatus (strain BP-1) GN=fabZ PE=3 SV=1	FabA-like domain
BnaA04T0138000WE	0.939176	0.143066	0.0612105	0.293683	1.137	0.0238909	GO:0004601	peroxidase 17; K00430 peroxidase [EC:1.11.1.7] (A)	Peroxidase 17 OS=Arabidopsis thaliana GN=PER17 PE=2 SV=1	Peroxidase
BnaA04T0142900WE	-0.355622	0.0686377	0.0147265	0.225445	-0.751764	0.00832615	GO:0016747	BAHD acyltransferase At5g47980-like; K13065 shikimate O-hydroxycinnamoyltransferase [EC:2.3.1.133] (A)	BAHD acyltransferase At5g47980 OS=Arabidopsis thaliana GN=BAHD1 PE=2 SV=1	Transferase family
BnaA04T0144100WE	-0.562711	0.0358155	-0.317043	0.359854	0.965544	0.0177365	GO:0000151	U-box domain-containing protein 2-like; K08332 vacuolar protein 8 (A)	U-box domain-containing protein 2 OS=Arabidopsis thaliana GN=PUB2 PE=2 SV=1	U-box domain
BnaA04T0145400WE	0.101958	0.197225	-0.0773988	0.315519	-0.706163	0.00115802	GO:0003676	polyadenylate-binding protein 4-like; K13126 polyadenylate-binding protein (A)	Polyadenylate-binding protein 4 OS=Arabidopsis thaliana GN=PAB4 PE=1 SV=1	Poly-adenylate binding protein, unique domain
BnaA04T0152800WE	-0.616584	0.113293	-0.317223	0.0246274	1.91534	0.0240031	--	polyribonucleotide nucleotidyltransferase 2, mitochondrial-like; K00962 polyribonucleotide nucleotidyltransferase [EC:2.7.7.8] (A)	Selenoprotein H OS=Homo sapiens GN=SELH PE=1 SV=2	--
BnaA04T0164000WE	-0.690286	0.123237	-0.496765	0.0829708	1.83309	0.0032497	--	cgn; cingulin; K06102 cingulin (A)	Protein WEAK CHLOROPLAST MOVEMENT UNDER BLUE LIGHT 1 OS=Arabidopsis thaliana GN=WEB1 PE=1 SV=1	Weak chloroplast movement under blue light
BnaA04T0164300WE	0.360941	0.0537028	0.584	0.0186903	1.10496	0.0131963	GO:0004672	probable inactive receptor kinase At2g26730; K04730 interleukin-1 receptor-associated kinase 1 [EC:2.7.11.1] (A)	Probable inactive receptor kinase At2g26730 OS=Arabidopsis thaliana GN=At2g26730 PE=1 SV=1	Leucine rich repeat N-terminal domain
BnaA04T0165700WE	-0.00447067	0.353578	0.723715	0.00832871	1.74285	0.0122218	GO:0004252	peptidase, putative (EC:3.4.21.25); K18443 golgi-specific brefeldin A-resistance guanine nucleotide exchange factor 1 (A)	CO(2)-response secreted protease OS=Arabidopsis thaliana GN=CRSP PE=2 SV=1	PA domain
BnaA04T0170100WE	0.0543419	0.202772	-0.21247	0.188905	-0.899936	0.0142984	--	hypothetical protein; K11276 nucleophosmin 1 (A)	Histone deacetylase HDT4 OS=Arabidopsis thaliana GN=HDT4 PE=2 SV=1	--
BnaA04T0174800WE	0.00525629	0.104538	0.983147	0.0105736	0.897522	0.0176577	GO:0000786	histone H2B.3-like; K11252 histone H2B (A)	Histone H2B.3 OS=Arabidopsis thaliana GN=At2g28720 PE=1 SV=3	Core histone H2A/H2B/H3/H4
BnaA04T0180100WE	0.271215	0.0215263	-0.643198	0.00264355	-0.53334	0.00426206	GO:0005515	glutathione S-transferase U7; K00799 glutathione S-transferase [EC:2.5.1.18] (A)	Glutathione S-transferase U7 OS=Arabidopsis thaliana GN=GSTU7 PE=2 SV=1	Glutathione S-transferase, C-terminal domain
BnaA04T0183500WE	-1.20345	0.14187	0.343876	0.139582	1.23666	0.0453892	GO:0005507	laccase-3; K05909 laccase [EC:1.10.3.2] (A)	Laccase-3 OS=Arabidopsis thaliana GN=LAC3 PE=2 SV=2	Multicopper oxidase
BnaA04T0186800WE	-0.415914	0.179277	0.100585	0.341851	1.79561	0.0218987	GO:0000786	histone H1.2; K11275 histone H1/5 (A)	Histone H1.2 OS=Arabidopsis thaliana GN=At2g30620 PE=1 SV=1	linker histone H1 and H5 family
BnaA04T0188600WE	0.190237	0.0306947	-0.341103	0.0257639	-0.550588	0.00440198	GO:0005515	glutathione S-transferase F9-like; K00799 glutathione S-transferase [EC:2.5.1.18] (A)	Glutathione S-transferase F9 OS=Arabidopsis thaliana GN=GSTF9 PE=1 SV=1	Glutathione S-transferase, N-terminal domain
BnaA04T0189100WE	-0.227742	0.0919999	0.00345952	0.374439	2.23983	0.0153122	--	--	--	--
BnaA04T0189600WE	-0.13461	0.0696328	-0.168122	0.0490888	-0.741706	0.0010634	GO:0006520	aspartate aminotransferase, mitochondrial-like; K14455 aspartate aminotransferase, mitochondrial [EC:2.6.1.1] (A)	Aspartate aminotransferase, mitochondrial OS=Arabidopsis thaliana GN=ASP1 PE=1 SV=1	Aminotransferase class I and II
BnaA04T0191500WE	-0.350967	0.0425202	0.135301	0.165809	0.57458	0.0279263	GO:0000398	pre-mRNA-processing-splicing factor 8-like; K12856 pre-mRNA-processing factor 8 (A)	Pre-mRNA-processing-splicing factor 8 OS=Mus musculus GN=Prpf8 PE=1 SV=2	JAB1/Mov34/MPN/PAD-1 ubiquitin protease
BnaA04T0193600WE	-0.330248	0.119358	-0.311859	0.0775347	-0.55481	0.000913218	GO:0003723	40S ribosomal protein S3-2; K02985 small subunit ribosomal protein S3e (A)	40S ribosomal protein S3-3 OS=Arabidopsis thaliana GN=RPS3C PE=1 SV=1	KH domain
BnaA04T0194300WE	0.148682	0.0422823	-0.129276	0.186853	-0.611168	0.0051479	GO:0004747	probable fructokinase-1; K00847 fructokinase [EC:2.7.1.4] (A)	Probable fructokinase-1 OS=Arabidopsis thaliana GN=At2g31390 PE=2 SV=1	pfkB family carbohydrate kinase
BnaA04T0197100WE	-0.549419	0.0366552	-0.749827	0.0794585	-0.888537	0.0245149	GO:0008080	--	Uncharacterized N-acetyltransferase p20 OS=Bacillus licheniformis GN=p20 PE=3 SV=1	Acetyltransferase (GNAT) domain
BnaA04T0204000WE	-1.42523	0.072605	-1.12089	0.0557905	0.595082	0.0477581	--	CLO3; probable peroxygenase 3; K17991 peroxygenase [EC:1.11.2.3] (A)	Probable peroxygenase 3 OS=Arabidopsis thaliana GN=PXG3 PE=1 SV=1	Caleosin related protein
BnaA04T0210500WE	-0.0738199	0.0902894	-0.314653	0.180371	1.70095	0.00343851	--	urease accessory protein G; K03189 urease accessory protein (A)	Urease accessory protein G OS=Arabidopsis thaliana GN=UREG PE=2 SV=1	CobW/HypB/UreG, nucleotide-binding domain
BnaA04T0211300WE	0.195169	0.0577434	-0.212017	0.296978	2.04617	0.014293	--	--	--	--
BnaA04T0212200WE	-0.0994351	0.243445	0.766267	0.00333992	2.62225	0.0117594	GO:0003824	cysteine desulfurase, mitochondrial precursor; K04487 cysteine desulfurase [EC:2.8.1.7] (A)	Tetrahydrocannabinolic acid synthase OS=Cannabis sativa PE=1 SV=1	Berberine and berberine like
BnaA04T0217600WE	-0.872149	0.0926393	0.528563	0.00260802	1.90837	0.0401368	GO:0004185	serine carboxypeptidase-like 28; K16297 serine carboxypeptidase-like clade II [EC:3.4.16.-] (A)	Serine carboxypeptidase-like 28 OS=Arabidopsis thaliana GN=SCPL28 PE=2 SV=2	Serine carboxypeptidase
BnaA04T0217700WE	-0.247086	0.0203215	0.0248041	0.311506	1.34122	0.0274139	GO:0004185	serine carboxypeptidase-like 26; K16297 serine carboxypeptidase-like clade II [EC:3.4.16.-] (A)	Serine carboxypeptidase-like 26 OS=Arabidopsis thaliana GN=SCPL26 PE=2 SV=1	Serine carboxypeptidase
BnaA04T0218600WE	-1.4352	0.014396	-0.34164	0.0923868	1.28895	0.0263699	--	STAB2; stabilin 2; K19013 stabilin-2 (A)	Fasciclin-like arabinogalactan protein 16 OS=Arabidopsis thaliana GN=FLA16 PE=2 SV=1	Fasciclin domain
BnaA04T0221600WE	-0.142464	0.0669677	0.245412	0.121175	0.695381	0.00826144	GO:0003924	cell division protein FtsZ homolog 2-1, chloroplastic-like; K03531 cell division protein FtsZ (A)	Cell division protein FtsZ homolog 2-1, chloroplastic OS=Arabidopsis thaliana GN=FTSZ2-1 PE=1 SV=2	FtsZ family, C-terminal domain
BnaA04T0223800WE	-0.064647	0.0305291	-0.169594	0.229396	-0.797604	0.00551702	GO:0000015	bifunctional enolase 2/transcriptional activator; K01689 enolase [EC:4.2.1.11] (A)	Bifunctional enolase 2/transcriptional activator OS=Arabidopsis thaliana GN=ENO2 PE=1 SV=1	Enolase, N-terminal domain
BnaA04T0226200WE	0.529913	0.0120051	0.0775712	0.297438	0.712818	0.0301245	GO:0009058	phenylalanine ammonia-lyase 1; K10775 phenylalanine ammonia-lyase [EC:4.3.1.24] (A)	Phenylalanine ammonia-lyase 1 OS=Arabidopsis thaliana GN=PAL1 PE=1 SV=3	Aromatic amino acid lyase
BnaA04T0234300WE	-0.544138	0.232856	-0.268739	0.228836	0.63052	0.028143	GO:0004601	peroxidase C3; K00430 peroxidase [EC:1.11.1.7] (A)	Peroxidase C3 OS=Armoracia rusticana GN=PRXC3 PE=3 SV=1	Peroxidase
BnaA04T0242700WE	0.122119	0.362582	0.506851	0.0354102	0.866761	0.0130573	GO:0005576	malate dehydrogenase [NADP], chloroplastic-like; K00051 malate dehydrogenase (NADP+) [EC:1.1.1.82] (A)	Expansin-A4 OS=Arabidopsis thaliana GN=EXPA4 PE=1 SV=1	Lytic transglycolase
BnaA04T0249700WE	0.25772	0.218315	-0.639079	0.0266718	1.1326	0.0132143	GO:0005506	cytochrome P450 98A3-like; K09754 coumaroylquinate(coumaroylshikimate) 3'-monooxygenase [EC:1.14.13.36] (A)	Cytochrome P450 98A3 OS=Arabidopsis thaliana GN=CYP98A3 PE=1 SV=1	Cytochrome P450
BnaA04T0251300WE	-0.148965	0.0204561	0.281901	0.0224612	0.771159	0.00407005	GO:0006537	ferredoxin-dependent glutamate synthase 2, chloroplastic-like; K00284 glutamate synthase (ferredoxin) [EC:1.4.7.1] (A)	Ferredoxin-dependent glutamate synthase 2, chloroplastic OS=Arabidopsis thaliana GN=GLU2 PE=1 SV=2	GXGXG motif
BnaA04T0253000WE	-0.246918	0.0912018	-1.1163	0.00351106	-1.25923	0.014068	--	--	Protein EARLY RESPONSIVE TO DEHYDRATION 15 OS=Arabidopsis thaliana GN=ERD15 PE=1 SV=1	Ataxin-2 C-terminal region
BnaA04T0253300WE	0.236456	0.266407	0.314163	0.0441388	1.37473	0.00473191	--	DEAD-box ATP-dependent RNA helicase 7-like; K16911 ATP-dependent RNA helicase DDX21 [EC:3.6.4.13] (A)	--	Embryo-specific protein 3, (ATS3)
BnaA04T0255800WE	-0.753464	0.163506	0.391475	0.122767	0.9971	0.0430279	GO:0005515	D-tyrosyl-tRNA(Tyr) deacylase; K07560 D-tyrosyl-tRNA(Tyr) deacylase [EC:3.1.-.-] (A)	Zinc finger CCCH domain-containing protein 30 OS=Arabidopsis thaliana GN=At2g41900 PE=1 SV=2	Zinc finger C-x8-C-x5-C-x3-H type (and similar)
BnaA04T0259400WE	0.144066	0.0245219	1.21533	0.0191456	0.916723	0.0105	GO:0004806	phospholipase A(1) DAD1, chloroplastic-like; K16818 phospholipase A1 [EC:3.1.1.32] (A)	Phospholipase A1-IIdelta OS=Arabidopsis thaliana GN=At2g42690 PE=1 SV=1	Lipase (class 3)
BnaA04T0264800WE	0.329693	0.0291797	-0.306774	0.0114171	-0.579937	0.0181913	GO:0003735	60S ribosomal protein L38-like; K02923 large subunit ribosomal protein L38e (A)	60S ribosomal protein L38 OS=Arabidopsis thaliana GN=RPL38A PE=3 SV=1	Ribosomal L38e protein family
BnaA04T0267200WE	0.185104	0.0715584	0.0766454	0.334693	0.733657	0.0426476	GO:0008757	hypothetical protein; K00569 thiopurine S-methyltransferase [EC:2.1.1.67] (A)	Probable thiocyanate methyltransferase 2 OS=Brassica oleracea GN=TMT2 PE=2 SV=1	Thiopurine S-methyltransferase (TPMT)
BnaA04T0275900WE	0.187438	0.0965561	-0.225225	0.284476	2.20749	0.0165532	--	--	Remorin OS=Arabidopsis thaliana GN=DBP PE=1 SV=1	Remorin, N-terminal region
BnaA04T0280300WE	0.154477	0.123482	0.572949	0.00947109	0.925697	0.0181064	--	--	--	--
BnaA05T0004300WE	0.0396748	0.368889	0.603563	0.00303078	0.997367	0.000561831	--	--	Filamentous hemagglutinin OS=Bordetella pertussis (strain Tohama I / ATCC BAA-589 / NCTC 13251) GN=fhaB PE=1 SV=4	--
BnaA05T0010800WE	0.918469	0.0712049	-0.515409	0.0322864	-0.539958	0.0367341	GO:0000049	uncharacterized tRNA-binding protein C30C2.04; K15437 aminoacyl tRNA synthase complex-interacting multifunctional protein 1 (A)	Methionine--tRNA ligase, cytoplasmic OS=Arabidopsis thaliana GN=At4g13780 PE=2 SV=1	Putative tRNA binding domain
BnaA05T0011300WE	0.190038	0.332483	0.12478	0.0645571	0.582715	0.00523849	--	--	--	--
BnaA05T0014100WE	0.35001	0.105747	0.458481	0.00716261	0.952444	0.00602235	GO:0009058	hypothetical protein; K01757 strictosidine synthase [EC:4.3.3.2] (A)	Protein STRICTOSIDINE SYNTHASE-LIKE 1 OS=Arabidopsis thaliana GN=SSL1 PE=3 SV=1	Strictosidine synthase
BnaA05T0022400WE	-1.21391	0.0406927	0.403946	0.194876	1.14358	0.0439033	--	--	Protein trichome birefringence-like 39 OS=Arabidopsis thaliana GN=TBL39 PE=2 SV=1	PMR5 N terminal Domain
BnaA05T0027100WE	0.579161	0.0447188	0.20971	0.0119478	0.786696	0.00940234	GO:0003861	3-isopropylmalate dehydratase small subunit 1-like; K01704 3-isopropylmalate/(R)-2-methylmalate dehydratase small subunit [EC:4.2.1.33 4.2.1.35] (A)	3-isopropylmalate dehydratase small subunit 1 OS=Arabidopsis thaliana GN=IPMI2 PE=1 SV=1	Aconitase C-terminal domain
BnaA05T0033100WE	1.02263	0.0695591	0.377405	0.103876	1.2938	0.0198486	GO:0004489	methylenetetrahydrofolate reductase 2-like; K00297 methylenetetrahydrofolate reductase (NADPH) [EC:1.5.1.20] (A)	Methylenetetrahydrofolate reductase 2 OS=Arabidopsis thaliana GN=MTHFR2 PE=1 SV=2	SET domain
BnaA05T0035200WE	-0.0705797	0.168865	0.0580709	0.315983	-0.74943	0.00697854	GO:0004553	beta-glucosidase 26, peroxisomal; K01188 beta-glucosidase [EC:3.2.1.21] (A)	Beta-glucosidase 26, peroxisomal OS=Arabidopsis thaliana GN=BGLU26 PE=1 SV=1	Glycosyl hydrolase family 1
BnaA05T0039600WE	-0.875108	0.092497	-0.810418	0.00142954	-1.17428	0.0260147	GO:0003924	elongation factor G-2, mitochondrial; K02355 elongation factor G (A)	Elongation factor G-2, mitochondrial OS=Arabidopsis thaliana GN=MEFG2 PE=2 SV=1	Elongation factor Tu domain 2
BnaA05T0042500WE	-0.109067	0.0952599	-0.311639	0.0624985	1.8658	0.00896933	--	serine/threonine-protein phosphatase 2A 65 kDa regulatory subunit A beta isoform-like; K03456 serine/threonine-protein phosphatase 2A regulatory subunit A (A)	Fasciclin-like arabinogalactan protein 8 OS=Arabidopsis thaliana GN=FLA8 PE=1 SV=1	Fasciclin domain
BnaA05T0042800WE	0.193048	0.204746	0.381641	0.0325641	0.768736	0.00920156	GO:0005506	hypothetical protein; K15402 fatty acid omega-hydroxylase [EC:1.14.-.-] (A)	Cytochrome P450 704C1 OS=Pinus taeda GN=CYP704C1 PE=2 SV=1	Cytochrome P450
BnaA05T0052500WE	0.0824	0.296357	-0.523101	0.0223229	-0.823231	0.00451748	GO:0005759	uncharacterized protein At2g39795, mitochondrial-like; K15414 complement component 1 Q subcomponent-binding protein, mitochondrial (A)	Uncharacterized protein At2g39795, mitochondrial OS=Arabidopsis thaliana GN=At2g39795 PE=2 SV=1	Mitochondrial glycoprotein
BnaA05T0056300WE	0.222302	0.193072	0.0387217	0.314584	-0.741186	0.0332386	--	--	Jacalin-related lectin 22 OS=Arabidopsis thaliana GN=JAL22 PE=1 SV=1	Jacalin-like lectin domain
BnaA05T0059900WE	-0.46144	0.0751778	-0.0859125	0.284902	0.76756	0.0257314	GO:0016020	--	Protein FATTY ACID EXPORT 3, chloroplastic OS=Arabidopsis thaliana GN=FAX3 PE=2 SV=2	Transmembrane proteins 14C
BnaA05T0061700WE	-0.235448	0.218919	0.30179	0.0460167	0.550404	0.0277019	GO:0008519	ammonium transporter 2; K03320 ammonium transporter, Amt family (A)	Ammonium transporter 2 OS=Arabidopsis thaliana GN=AMT2 PE=1 SV=2	Ammonium Transporter Family
BnaA05T0070000WE	-0.129427	0.100139	0.214179	0.0707199	0.743711	0.0220698	GO:0005215	aquaporin PIP2-2-like; K09872 aquaporin PIP (A)	Aquaporin PIP2-2 OS=Arabidopsis thaliana GN=PIP2-2 PE=1 SV=2	Major intrinsic protein
BnaA05T0070500WE	0.453813	0.0454682	0.0527197	0.352882	1.02998	0.017581	GO:0009058	phenylalanine ammonia-lyase 1; K10775 phenylalanine ammonia-lyase [EC:4.3.1.24] (A)	Phenylalanine ammonia-lyase 1 OS=Arabidopsis thaliana GN=PAL1 PE=1 SV=3	Aromatic amino acid lyase
BnaA05T0072100WE	-0.523301	0.19888	0.0803009	0.176794	1.72495	0.0139136	--	--	--	Protein of unknown function (DUF4079)
BnaA05T0074600WE	-0.373113	0.00462001	-0.519434	0.0977688	-0.709131	0.0145218	GO:0000015	bifunctional enolase 2/transcriptional activator-like; K01689 enolase [EC:4.2.1.11] (A)	Bifunctional enolase 2/transcriptional activator OS=Arabidopsis thaliana GN=ENO2 PE=1 SV=1	Enolase, N-terminal domain
BnaA05T0076500WE	0.166502	0.144603	0.54624	0.0524727	1.21703	0.00518621	--	--	--	Alpha/beta hydrolase family
BnaA05T0077700WE	0.0755362	0.198154	0.102511	0.27909	0.632596	0.00156071	--	--	Casparian strip membrane protein 1 OS=Raphanus raphanistrum PE=2 SV=1	Domain of unknown function (DUF588)
BnaA05T0083300WE	-0.576379	0.197775	0.615853	0.0051838	1.29803	0.00230209	--	pectin acetylesterase 7-like; K19882 O-palmitoleoyl-L-serine hydrolase [EC:3.1.1.98] (A)	Pectin acetylesterase 7 OS=Arabidopsis thaliana GN=PAE7 PE=2 SV=1	Pectinacetylesterase
BnaA05T0091600WE	-0.0371187	0.256201	0.101003	0.239155	1.20756	0.00738961	GO:0015031	secretory carrier-associated membrane protein 4-like; K19995 secretory carrier-associated membrane protein (A)	Secretory carrier-associated membrane protein 4 OS=Arabidopsis thaliana GN=SCAMP4 PE=2 SV=1	SCAMP family
BnaA05T0095800WE	0.0540798	0.179208	-0.0913966	0.0687576	-0.519784	0.00370517	GO:0003937	bifunctional purine biosynthesis protein PurH-like; K00602 phosphoribosylaminoimidazolecarboxamide formyltransferase / IMP cyclohydrolase [EC:2.1.2.3 3.5.4.10] (A)	Bifunctional purine biosynthesis protein PurH OS=Syntrophomonas wolfei subsp. wolfei (strain DSM 2245B / Goettingen) GN=purH PE=3 SV=1	MGS-like domain
BnaA05T0105300WE	0.188944	0.342047	0.49968	0.0740072	3.38413	0.0079292	--	--	Auxin-repressed 12.5 kDa protein OS=Fragaria ananassa PE=2 SV=1	Dormancy/auxin associated protein
BnaA05T0111300WE	-0.0143262	0.141606	0.486415	0.0568632	0.58936	0.0154556	GO:0016021	vesicle-associated membrane protein 722; K08511 vesicle-associated membrane protein 72 (A)	Vesicle-associated membrane protein 722 OS=Arabidopsis thaliana GN=VAMP722 PE=2 SV=2	Regulated-SNARE-like domain
BnaA05T0117900WE	1.54352	0.181778	0.441683	0.103016	1.0209	0.0130412	--	heat shock 70 kDa protein 8-like; K09489 heat shock 70kDa protein 4 (A)	Heat shock 70 kDa protein 8 OS=Arabidopsis thaliana GN=HSP70-8 PE=1 SV=1	Hsp70 protein
BnaA05T0129600WE	0.355396	0.0264382	-0.0574047	0.311505	0.801167	0.00697367	GO:0004672	PTI1-like tyrosine-protein kinase 2; K13436 pto-interacting protein 1 [EC:2.7.11.1] (A)	PTI1-like tyrosine-protein kinase 2 OS=Arabidopsis thaliana GN=PTI12 PE=1 SV=1	Protein tyrosine kinase
BnaA05T0135600WE	-0.0440592	0.102159	0.265663	0.0143174	0.600554	0.000464921	GO:0003755	cyclophilin; K01802 peptidylprolyl isomerase [EC:5.2.1.8] (A)	Peptidyl-prolyl cis-trans isomerase CYP19-4 OS=Arabidopsis thaliana GN=CYP19-4 PE=1 SV=2	Cyclophilin type peptidyl-prolyl cis-trans isomerase/CLD
BnaA05T0141800WE	0.168672	0.0652157	0.670127	0.0033776	1.22304	0.00771345	GO:0005985	sucrose synthase 5; K00695 sucrose synthase [EC:2.4.1.13] (A)	Sucrose synthase 5 OS=Arabidopsis thaliana GN=SUS5 PE=2 SV=1	Glycosyl transferases group 1
BnaA05T0144600WE	-0.0980701	0.273406	0.256597	0.127555	1.51662	0.0108868	GO:0008519	ammonium transporter 1 member 1; K03320 ammonium transporter, Amt family (A)	Ammonium transporter 1 member 1 OS=Arabidopsis thaliana GN=AMT1-1 PE=1 SV=1	Ammonium Transporter Family
BnaA05T0146100WE	-0.168841	0.384735	0.14098	0.387498	1.37713	0.00375648	GO:0006508	acylamino-acid-releasing enzyme-like; K01303 acylaminoacyl-peptidase [EC:3.4.19.1] (A)	Acylamino-acid-releasing enzyme OS=Rattus norvegicus GN=Apeh PE=1 SV=1	Prolyl oligopeptidase family
BnaA05T0152700WE	-0.299779	0.0295161	-0.178795	0.143354	-0.887075	0.0138753	GO:0008152	putative aarF domain-containing protein kinase 1; K08869 aarF domain-containing kinase (A)	Putative methyltransferase DDB_G0268948 OS=Dictyostelium discoideum GN=DDB_G0268948 PE=1 SV=2	Methyltransferase domain
BnaA05T0153600WE	0.855821	0.0504379	-0.0205673	0.316629	0.799275	0.014879	--	--	Uncharacterized protein At5g01610 OS=Arabidopsis thaliana GN=At5g01610 PE=1 SV=1	Protein of unknown function, DUF538
BnaA05T0153800WE	-0.204943	0.0879902	0.540517	0.0138442	1.96209	0.0124868	--	hypothetical protein; K01870 isoleucyl-tRNA synthetase [EC:6.1.1.5] (A)	Dirigent protein 20 OS=Arabidopsis thaliana GN=DIR20 PE=2 SV=1	Dirigent-like protein
BnaA05T0153900WE	-0.109851	0.342472	-0.250211	0.121899	0.535027	0.02034	--	3-epi-6-deoxocathasterone 23-monooxygenase; K12638 3-epi-6-deoxocathasterone 23-monooxygenase [EC:1.14.13.112] (A)	PRA1 family protein F2 OS=Arabidopsis thaliana GN=PRA1F2 PE=1 SV=1	PRA1 family protein
BnaA05T0155400WE	0.185879	0.212096	-0.769832	0.00164551	-1.00527	0.00861095	GO:0006629	hypothetical protein; K00679 phospholipid:diacylglycerol acyltransferase [EC:2.3.1.158] (A)	Inactive GDSL esterase/lipase-like protein 23 OS=Arabidopsis thaliana GN=GLL23 PE=1 SV=1	GDSL-like Lipase/Acylhydrolase
BnaA05T0160700WE	0.336145	0.329263	0.220314	0.0717728	0.617388	0.0117795	GO:0005509	vacuolar cation/proton exchanger 3-like; K07300 Ca2+:H+ antiporter (A)	Vacuolar calcium ion transporter OS=Saccharomyces cerevisiae (strain ATCC 204508 / S288c) GN=VCX1 PE=1 SV=1	EF-hand domain pair
BnaA05T0168600WE	0.118442	0.0745613	0.247665	0.0439557	0.721499	0.0151405	GO:0003824	4-coumarate--CoA ligase 1; K01904 4-coumarate--CoA ligase [EC:6.2.1.12] (A)	4-coumarate--CoA ligase 1 OS=Arabidopsis thaliana GN=4CL1 PE=1 SV=1	AMP-binding enzyme C-terminal domain
BnaA05T0175500WE	-0.168432	0.261295	0.0804543	0.119598	1.10714	0.00418678	GO:0005515	BTB/POZ and MATH domain-containing protein 3-like; K10523 speckle-type POZ protein (A)	MATH domain and coiled-coil domain-containing protein At3g58370 OS=Arabidopsis thaliana GN=At3g58370 PE=3 SV=3	MATH domain
BnaA05T0177400WE	-0.489707	0.0707003	-0.124825	0.283157	0.673758	0.0466784	GO:0005515	hypothetical protein; K02984 small subunit ribosomal protein S3Ae (A)	Uncharacterized protein At4g06744 OS=Arabidopsis thaliana GN=At4g06744 PE=2 SV=1	Leucine Rich Repeat
BnaA05T0178100WE	-0.391483	0.0385581	0.564896	0.0309685	1.71971	0.011153	GO:0003677	--	B3 domain-containing protein REM19 OS=Arabidopsis thaliana GN=REM19 PE=1 SV=1	B3 DNA binding domain
BnaA05T0178200WE	0.162352	0.349227	0.295554	0.042772	1.96136	0.0208655	GO:0003824	long chain acyl-CoA synthetase 2; K01897 long-chain acyl-CoA synthetase [EC:6.2.1.3] (A)	Long chain acyl-CoA synthetase 2 OS=Arabidopsis thaliana GN=LACS2 PE=2 SV=1	AMP-binding enzyme
BnaA05T0180700WE	0.153946	0.318958	0.0801931	0.203507	1.14013	0.0195962	GO:0000786	T1N15.24; K01598 phosphopantothenoylcysteine decarboxylase [EC:4.1.1.36] (A)	Putative DNA-binding protein At1g48610 OS=Arabidopsis thaliana GN=At1g48610 PE=1 SV=1	linker histone H1 and H5 family
BnaA05T0276900WE	0.430802	0.151644	-0.139627	0.204474	1.10223	0.00446995	GO:0016021	tobamovirus multiplication protein 2A-like; K17353 tetraspanin-18 (A)	Tobamovirus multiplication protein 2A OS=Arabidopsis thaliana GN=TOM2A PE=1 SV=1	Tetraspanin family
BnaA05T0288000WE	-0.209331	0.26666	0.441903	0.111645	1.93876	0.000322321	GO:0009916	ubiquinol oxidase 1a, mitochondrial-like; K17893 ubiquinol oxidase [EC:1.10.3.11] (A)	Ubiquinol oxidase 1a, mitochondrial OS=Arabidopsis thaliana GN=AOX1A PE=1 SV=2	Alternative oxidase
BnaA05T0294100WE	-0.0122078	0.19408	0.613382	0.00320114	0.855427	0.0249813	--	--	--	Protein of unknown function (DUF679)
BnaA05T0298000WE	-0.8315	0.012272	0.599201	0.031725	0.763003	0.043987	GO:0004571	mannosyl-oligosaccharide 1,2-alpha-mannosidase MNS2-like; K01230 mannosyl-oligosaccharide alpha-1,2-mannosidase [EC:3.2.1.113] (A)	Mannosyl-oligosaccharide 1,2-alpha-mannosidase MNS2 OS=Arabidopsis thaliana GN=MNS2 PE=1 SV=1	Glycosyl hydrolase family 47
BnaA05T0306400WE	0.043204	0.0783102	-0.118696	0.303772	1.18161	0.0147288	GO:0003723	pumilio homolog 5-like; K17943 pumilio RNA-binding family (A)	Pumilio homolog 5 OS=Arabidopsis thaliana GN=APUM5 PE=1 SV=2	Pumilio-family RNA binding repeat
BnaA05T0316200WE	-0.654111	0.111077	0.323125	0.135013	1.16973	0.0203247	GO:0008270	cinnamyl alcohol dehydrogenase 4; K00083 cinnamyl-alcohol dehydrogenase [EC:1.1.1.195] (A)	Cinnamyl alcohol dehydrogenase 4 OS=Arabidopsis thaliana GN=CAD4 PE=1 SV=1	Zinc-binding dehydrogenase
BnaA05T0317200WE	-1.5146	0.260838	0.328265	0.136005	2.07733	0.0245732	GO:0005198	hypothetical protein; K02984 small subunit ribosomal protein S3Ae (A)	Uncharacterized protein At4g06744 OS=Arabidopsis thaliana GN=At4g06744 PE=2 SV=1	Leucine Rich Repeat
BnaA05T0319800WE	-0.240332	0.015248	0.532115	0.00679973	1.40945	0.00719793	GO:0003677	--	B3 domain-containing transcription factor VRN1 OS=Arabidopsis thaliana GN=VRN1 PE=1 SV=1	B3 DNA binding domain
BnaA05T0323400WE	0.178292	0.207081	-0.251658	0.112385	-0.945742	0.00405257	GO:0003676	nucleolin 2-like; K11294 nucleolin (A)	Nucleolin 2 OS=Arabidopsis thaliana GN=NUCL2 PE=2 SV=1	RNA recognition motif. (a.k.a. RRM, RBD, or RNP domain)
BnaA05T0334600WE	0.0663781	0.138002	-0.149326	0.223512	0.785457	0.00889882	GO:0005515	novel plant SNARE 13-like; K08494 novel plant SNARE (A)	Novel plant SNARE 13 OS=Arabidopsis thaliana GN=NPSN13 PE=1 SV=1	Snare region anchored in the vesicle membrane C-terminus
BnaA05T0338300WE	0.00429873	0.146697	0.352646	0.103146	0.992562	0.0182525	GO:0003677	Triacylglycerol lipase SDP1; K14674 TAG lipase / steryl ester hydrolase / phospholipase A2 / LPA acyltransferase [EC:3.1.1.3 3.1.1.13 3.1.1.4 2.3.1.51] (A)	Calmodulin-binding transcription activator 6 OS=Arabidopsis thaliana GN=CMTA6 PE=2 SV=1	IPT/TIG domain
BnaA05T0341100WE	0.520493	0.0177855	-0.0626654	0.28035	1.69409	0.039355	--	--	Jacalin-related lectin 35 OS=Arabidopsis thaliana GN=JAL35 PE=1 SV=1	Jacalin-like lectin domain
BnaA05T0346000WE	-0.110958	0.130074	0.175184	0.313013	0.517294	0.0109764	GO:0003824	phospholipase D alpha 1-like; K01115 phospholipase D1/2 [EC:3.1.4.4] (A)	Phospholipase D alpha 1 OS=Brassica oleracea var. capitata GN=PLD1 PE=2 SV=1	C2 domain
BnaA05T0358200WE	-0.120172	0.0541792	0.297771	0.0055531	1.28771	0.0059816	GO:0004857	pectinesterase/pectinesterase inhibitor 3; K01051 pectinesterase [EC:3.1.1.11] (A)	Pectinesterase/pectinesterase inhibitor 3 OS=Arabidopsis thaliana GN=PME3 PE=2 SV=2	Plant invertase/pectin methylesterase inhibitor
BnaA05T0360900WE	0.192323	0.149886	0.335258	0.314102	0.833365	0.0156535	GO:0004252	peptidase, putative (EC:3.4.21.25); K18443 golgi-specific brefeldin A-resistance guanine nucleotide exchange factor 1 (A)	Subtilisin-like protease SBT1.7 OS=Arabidopsis thaliana GN=SBT1.7 PE=1 SV=1	PA domain
BnaA05T0363800WE	0.452677	0.0823704	0.468696	0.176749	1.9665	0.0107862	--	3-epi-6-deoxocathasterone 23-monooxygenase; K12638 3-epi-6-deoxocathasterone 23-monooxygenase [EC:1.14.13.112] (A)	PRA1 family protein F3 OS=Arabidopsis thaliana GN=PRA1F3 PE=1 SV=1	PRA1 family protein
BnaA05T0371700WE	0.103485	0.0773565	-0.623793	0.0817391	-0.924514	0.0066925	--	DCN1-like protein 2; K17822 DCN1-like protein 1/2 (A)	DCN1-like protein 2 OS=Mus musculus GN=Dcun1d2 PE=2 SV=3	UBA-like domain
BnaA05T0374000WE	-0.0458838	0.361948	-0.47606	0.019994	-0.832345	0.00623567	GO:0004568	endochitinase CH25-like; K01183 chitinase [EC:3.2.1.14] (A)	Endochitinase CH25 OS=Brassica napus PE=2 SV=1	Chitin recognition protein
BnaA05T0376300WE	-0.182429	0.232411	-0.689888	0.286786	0.84531	0.0219715	GO:0003723	far upstream element-binding protein 1-like; K13210 far upstream element-binding protein (A)	Zinc finger CCCH domain-containing protein 36 OS=Arabidopsis thaliana GN=At3g12130 PE=2 SV=1	KH domain
BnaA05T0379300WE	0.0941547	0.385176	0.215007	0.184429	1.33903	0.000642813	--	--	Putative phosphatidylglycerol/phosphatidylinositol transfer protein DDB_G0282179 OS=Dictyostelium discoideum GN=DDB_G0282179 PE=3 SV=2	ML domain
BnaA05T0380000WE	-0.878459	0.0928802	-0.223145	0.0489557	1.13993	0.0259865	--	--	Fasciclin-like arabinogalactan protein 18 OS=Arabidopsis thaliana GN=FLA18 PE=2 SV=1	Fasciclin domain
BnaA05T0382700WE	0.199126	0.247065	-0.264466	0.0522944	-0.615764	0.00595974	GO:0003676	eukaryotic translation initiation factor 3 subunit G; K03248 translation initiation factor 3 subunit G (A)	Eukaryotic translation initiation factor 3 subunit G OS=Xenopus tropicalis GN=eif3g PE=2 SV=1	RNA recognition motif. (a.k.a. RRM, RBD, or RNP domain)
BnaA05T0384700WE	0.630411	0.229294	0.782935	0.139243	0.825576	0.0331086	--	POPTRDRAFT_420078; hypothetical protein; K09903 uridylate kinase [EC:2.7.4.22] (A)	Trihelix transcription factor ASIL2 OS=Arabidopsis thaliana GN=ASIL2 PE=2 SV=1	Myb/SANT-like DNA-binding domain
BnaA05T0384900WE	-0.141604	0.202098	0.740235	0.347938	0.567178	0.0283817	GO:0019867	uncharacterized LOC103870377; K07277 outer membrane protein insertion porin family (A)	Sorting and assembly machinery component 50 homolog B OS=Xenopus laevis GN=samm50-b PE=2 SV=1	Surface antigen variable number repeat
BnaA05T0390200WE	-0.177251	0.0188711	-0.00827078	0.243976	0.607929	0.00863292	GO:0000145	exocyst complex component SEC8; K06111 exocyst complex component 4 (A)	Exocyst complex component SEC8 OS=Arabidopsis thaliana GN=SEC8 PE=1 SV=1	Sec8 exocyst complex component specific domain
BnaA05T0391300WE	-0.0128238	0.364349	-0.706039	0.0283919	-0.704207	0.0322374	--	tubulin-folding cofactor B; K17262 tubulin-folding cofactor B (A)	Tubulin-folding cofactor B OS=Arabidopsis thaliana GN=TFCB PE=1 SV=1	CAP-Gly domain
BnaA05T0394900WE	-0.185279	0.18207	0.0864789	0.355554	0.86812	0.00490536	GO:0005515	syntaxin-71-like; K08506 syntaxin of plants SYP7 (A)	Syntaxin-71 OS=Arabidopsis thaliana GN=SYP71 PE=1 SV=1	SNARE domain
BnaA05T0396500WE	-0.247757	0.0645281	0.496406	0.106361	1.59846	0.00655477	--	TTLL2; tubulin tyrosine ligase-like family member 2; K16600 tubulin polyglutamylase TTLL2 [EC:6.-.-.-] (A)	UNC93-like protein 3 OS=Arabidopsis thaliana GN=At3g09470 PE=2 SV=1	Ion channel regulatory protein UNC-93
BnaA05T0398000WE	0.252868	0.0838485	-0.471728	0.00321047	-0.880908	0.0111157	GO:0004553	beta-glucosidase 23-like; K01188 beta-glucosidase [EC:3.2.1.21] (A)	Beta-glucosidase 23 OS=Arabidopsis thaliana GN=BGLU23 PE=1 SV=1	Glycosyl hydrolase family 1
BnaA05T0406000WE	0.234311	0.0457928	-0.369136	0.0103659	-1.02544	0.00307479	GO:0005524	heat shock protein 90-1-like; K09487 heat shock protein 90kDa beta (A)	Heat shock protein 90 OS=Theileria annulata GN=TA12105 PE=3 SV=1	Histidine kinase-, DNA gyrase B-, and HSP90-like ATPase
BnaA05T0409100WE	-0.284244	0.0141995	0.541608	0.156931	0.501903	0.0449432	--	--	Uncharacterized protein At5g01610 OS=Arabidopsis thaliana GN=At5g01610 PE=1 SV=1	Protein of unknown function, DUF538
BnaA05T0409700WE	0.782223	0.121104	-0.299978	0.259725	-1.40699	0.00375502	--	--	Auxin-induced in root cultures protein 12 OS=Arabidopsis thaliana GN=AIR12 PE=1 SV=3	Protein of unknown function (DUF568)
BnaA05T0410200WE	-0.311079	0.244791	0.527564	0.0259557	0.716036	0.0264597	GO:0004553	hypothetical protein; K19891 glucan endo-1,3-beta-glucosidase 1/2/3 [EC:3.2.1.39] (A)	Probable glucan endo-1,3-beta-glucosidase A6 OS=Arabidopsis thaliana GN=A6 PE=2 SV=1	X8 domain
BnaA05T0413300WE	-0.252518	0.266126	0.0696312	0.205211	1.45281	0.0175885	GO:0005975	sterol 3-beta-glucosyltransferase UGT80A2; K05841 sterol 3beta-glucosyltransferase [EC:2.4.1.173] (A)	Sterol 3-beta-glucosyltransferase UGT80A2 OS=Arabidopsis thaliana GN=UGT80A2 PE=1 SV=1	UDP-glucoronosyl and UDP-glucosyl transferase
BnaA05T0413400WE	-0.965761	0.209167	0.651449	0.0504817	2.28708	0.0187986	--	probable pectate lyase 8; K01728 pectate lyase [EC:4.2.2.2] (A)	Probable pectate lyase 8 OS=Arabidopsis thaliana GN=At3g07010 PE=2 SV=1	Pectate lyase
BnaA05T0416500WE	0.0727887	0.24505	0.280436	0.24355	1.10715	0.00604874	GO:0004553	beta-glucosidase 27-like; K01188 beta-glucosidase [EC:3.2.1.21] (A)	Beta-glucosidase-like SFR2, chloroplastic OS=Arabidopsis thaliana GN=SFR2 PE=1 SV=1	Glycosyl hydrolase family 1
BnaA05T0417600WE	1.06914	0.0128198	0.80868	0.0498208	2.28529	0.0219489	--	--	CASP-like protein 1D2 OS=Arabidopsis thaliana GN=At3g06390 PE=1 SV=1	Domain of unknown function (DUF588)
BnaA05T0418500WE	-0.23501	0.1897	-0.196156	0.00941847	-0.608183	0.0112402	GO:0005506	prolyl 4-hydroxylase 2; K00472 prolyl 4-hydroxylase [EC:1.14.11.2] (A)	Prolyl 4-hydroxylase 2 OS=Arabidopsis thaliana GN=P4H2 PE=1 SV=1	2OG-Fe(II) oxygenase superfamily
BnaA05T0420000WE	0.510583	0.302725	-0.587459	0.0291277	-1.27845	0.00655622	GO:0006470	dual specificity protein phosphatase 1B; K14165 atypical dual specificity phosphatase [EC:3.1.3.16 3.1.3.48] (A)	Dual specificity protein phosphatase 1B OS=Arabidopsis thaliana GN=DSPTP1B PE=1 SV=1	Dual specificity phosphatase, catalytic domain
BnaA05T0422200WE	-0.596347	0.254476	0.54262	0.245015	1.74967	0.0422862	--	pectin acetylesterase 12; K19882 O-palmitoleoyl-L-serine hydrolase [EC:3.1.1.98] (A)	Pectin acetylesterase 12 OS=Arabidopsis thaliana GN=PAE12 PE=2 SV=1	Pectinacetylesterase
BnaA05T0422300WE	0.254482	0.14048	-0.592238	0.0746243	1.14358	0.0336262	--	chromodomain-helicase-DNA-binding protein 8; K14437 chromodomain-helicase-DNA-binding protein 7 [EC:3.6.4.12] (A)	--	--
BnaA05T0429100WE	-0.164311	0.263585	0.217555	0.0809565	1.49927	0.00152862	GO:0004672	probable serine/threonine-protein kinase At1g54610; K08819 cyclin-dependent kinase 12/13 [EC:2.7.11.22 2.7.11.23] (A)	Probable serine/threonine-protein kinase At1g54610 OS=Arabidopsis thaliana GN=At1g54610 PE=1 SV=1	Protein kinase domain
BnaA05T0431700WE	-0.362835	0.135389	0.0924421	0.292633	-0.697937	0.00644543	GO:0006662	hypothetical protein; K15218 RNA polymerase I-specific transcription initiation factor RRN6 (A)	PITH domain-containing protein At3g04780 OS=Arabidopsis thaliana GN=At3g04780 PE=1 SV=2	PITH domain
BnaA05T0435400WE	2.2438	0.0298325	1.09664	0.0438088	1.84529	0.0444627	GO:0016620	glyceraldehyde-3-phosphate dehydrogenase, cytosolic-like; K00134 glyceraldehyde 3-phosphate dehydrogenase [EC:1.2.1.12] (A)	Glyceraldehyde-3-phosphate dehydrogenase, cytosolic OS=Sinapis alba GN=GAPC PE=2 SV=2	Glyceraldehyde 3-phosphate dehydrogenase, NAD binding domain
BnaA05T0439900WE	0.203345	0.0241654	-0.437131	0.0260831	-0.72537	0.0084505	GO:0005524	T-complex protein 1 subunit zeta; K09498 T-complex protein 1 subunit zeta (A)	T-complex protein 1 subunit zeta 1 OS=Arabidopsis thaliana GN=CCT6A PE=1 SV=1	TCP-1/cpn60 chaperonin family
BnaA05T0443600WE	0.260111	0.102196	-0.249025	0.250368	1.02524	0.0495084	GO:0004190	aspartyl protease family protein; K00924 [EC:2.7.1.-] (A)	Aspartic proteinase-like protein 2 OS=Arabidopsis thaliana GN=At1g65240 PE=1 SV=2	Eukaryotic aspartyl protease
BnaA05T0444600WE	-0.425457	0.354033	0.765321	0.00362129	1.07593	0.0070368	--	uncharacterized LOC103421379; K17609 nucleoredoxin [EC:1.8.1.8] (A)	Protein SIEVE ELEMENT OCCLUSION A OS=Arabidopsis thaliana GN=SEOA PE=1 SV=1	Sieve element occlusion N-terminus
BnaA05T0444700WE	0.0157327	0.219315	0.786575	0.00079756	1.32917	0.00360904	--	uncharacterized LOC103421379; K17609 nucleoredoxin [EC:1.8.1.8] (A)	Protein SIEVE ELEMENT OCCLUSION B OS=Arabidopsis thaliana GN=SEOB PE=1 SV=1	Sieve element occlusion C-terminus
BnaA06T0012100WE	-0.877135	0.117984	0.126424	0.182178	1.45988	0.00762534	GO:0005509	vacuolar cation/proton exchanger 3-like; K07300 Ca2+:H+ antiporter (A)	Vacuolar calcium ion transporter OS=Saccharomyces cerevisiae (strain ATCC 204508 / S288c) GN=VCX1 PE=1 SV=1	EF-hand domain pair
BnaA06T0018700WE	-0.0545553	0.135139	0.162802	0.2628	-0.739076	0.012446	GO:0045454	protein disulfide isomerase-like 1-5; K09580 protein disulfide-isomerase A1 [EC:5.3.4.1] (A)	Protein disulfide isomerase-like 1-5 OS=Arabidopsis thaliana GN=PDIL1-5 PE=2 SV=1	Thioredoxin-like domain
BnaA06T0026400WE	0.408216	0.210234	0.328324	0.219256	0.850755	0.014407	--	3-epi-6-deoxocathasterone 23-monooxygenase; K12638 3-epi-6-deoxocathasterone 23-monooxygenase [EC:1.14.13.112] (A)	PRA1 family protein B1 OS=Arabidopsis thaliana GN=PRA1B1 PE=1 SV=1	PRA1 family protein
BnaA06T0028500WE	0.293782	0.324373	-0.0185032	0.150378	0.853224	0.0298718	GO:0016798	pseudouridine-5'-phosphate glycosidase-like; K16329 pseudouridylate synthase [EC:4.2.1.70] (A)	Pseudouridine-5'-phosphate glycosidase OS=Staphylococcus aureus (strain MW2) GN=psuG PE=3 SV=1	Indigoidine synthase A like protein
BnaA06T0031200WE	0.375222	0.119717	-0.256999	0.0385611	-1.05027	0.0304562	GO:0003824	branched-chain-amino-acid aminotransferase 6; K00826 branched-chain amino acid aminotransferase [EC:2.6.1.42] (A)	Branched-chain-amino-acid aminotransferase 6 OS=Arabidopsis thaliana GN=BCAT6 PE=1 SV=1	Amino-transferase class IV
BnaA06T0033000WE	-0.494616	0.295874	0.0542143	0.345148	-1.23706	0.0129518	GO:0003676	polyadenylate-binding protein RBP45A-like; K03231 elongation factor 1-alpha (A)	Polyadenylate-binding protein RBP47A OS=Arabidopsis thaliana GN=RBP47A PE=2 SV=1	RNA recognition motif. (a.k.a. RRM, RBD, or RNP domain)
BnaA06T0033200WE	0.349023	0.0263807	0.0401634	0.282923	-0.879565	0.00709139	GO:0006508	presequence protease 2, chloroplastic/mitochondrial; K06972 presequence protease [EC:3.4.24.-] (A)	Presequence protease 2, chloroplastic/mitochondrial OS=Arabidopsis thaliana GN=PREP2 PE=1 SV=1	Insulinase (Peptidase family M16)
BnaA06T0034100WE	-0.19065	0.0719469	0.0872009	0.203659	-0.507177	0.00973894	--	methylthioribose kinase; K00899 5-methylthioribose kinase [EC:2.7.1.100] (A)	Methylthioribose kinase OS=Arabidopsis thaliana GN=MTK PE=1 SV=1	Phosphotransferase enzyme family
BnaA06T0034400WE	-0.622895	0.0115813	0.0846313	0.32309	-1.03745	0.0104323	GO:0005515	elongator complex protein 2; K11374 elongator complex protein 2 (A)	Elongator complex protein 2 OS=Arabidopsis thaliana GN=ELP2 PE=1 SV=1	WD domain, G-beta repeat
BnaA06T0034900WE	-0.238744	0.122549	0.543424	0.00565738	1.09078	0.00783634	GO:0016773	phosphatidylinositol 4-kinase alpha 1-like; K00888 phosphatidylinositol 4-kinase A [EC:2.7.1.67] (A)	Phosphatidylinositol 4-kinase alpha 1 OS=Arabidopsis thaliana GN=PI4KA1 PE=1 SV=2	Phosphoinositide 3-kinase family, accessory domain (PIK domain)
BnaA06T0038500WE	-0.189226	0.207865	1.01083	0.00825998	1.80806	0.0045064	GO:0000786	HMG-Y-related protein A-like; K11275 histone H1/5 (A)	HMG-Y-related protein A OS=Glycine max PE=2 SV=1	linker histone H1 and H5 family
BnaA06T0038600WE	-0.444708	0.016862	0.767988	0.0180329	2.11721	0.0054476	GO:0003677	T1N15.24; K01598 phosphopantothenoylcysteine decarboxylase [EC:4.1.1.36] (A)	Putative DNA-binding protein At1g48610 OS=Arabidopsis thaliana GN=At1g48610 PE=1 SV=1	AT hook motif
BnaA06T0041100WE	-0.403006	0.0750163	0.194383	0.231843	0.865724	0.0267102	--	Elongator complex protein 3; K07739 elongator complex protein 3 [EC:2.3.1.48] (A)	Probable sugar phosphate/phosphate translocator At1g48230 OS=Arabidopsis thaliana GN=At1g48230 PE=2 SV=2	Triose-phosphate Transporter family
BnaA06T0047400WE	0.0349719	0.134944	0.236414	0.0690321	0.745735	0.00456854	GO:0000166	vacuolar protein sorting-associated protein 4B; K12196 vacuolar protein-sorting-associated protein 4 (A)	Protein SUPPRESSOR OF K(+) TRANSPORT GROWTH DEFECT 1 OS=Arabidopsis thaliana GN=SKD1 PE=1 SV=1	MIT (microtubule interacting and transport) domain
BnaA06T0049100WE	-0.782014	0.0260677	0.492411	0.00442621	1.11673	0.002126	GO:0009058	hypothetical protein; K01757 strictosidine synthase [EC:4.3.3.2] (A)	Protein STRICTOSIDINE SYNTHASE-LIKE 3 OS=Arabidopsis thaliana GN=SSL3 PE=2 SV=1	Strictosidine synthase
BnaA06T0050300WE	0.125386	0.189719	-0.456827	0.0847355	-0.910384	0.00854677	--	probable low-specificity L-threonine aldolase 1; K01620 threonine aldolase [EC:4.1.2.48] (A)	--	--
BnaA06T0053900WE	0.187823	0.0574529	-0.536634	0.0352918	-0.568848	0.0289758	GO:0005515	hypothetical protein; K15043 importin subunit alpha-2 (A)	Importin subunit alpha-4 OS=Arabidopsis thaliana GN=IMPA4 PE=1 SV=1	Importin beta binding domain
BnaA06T0057200WE	-0.208639	0.0126617	-0.243911	0.0193805	-0.517693	0.00727686	GO:0003746	probable elongation factor 1-gamma 1; K03233 elongation factor 1-gamma (A)	Probable elongation factor 1-gamma 1 OS=Arabidopsis thaliana GN=At1g09640 PE=2 SV=1	Glutathione S-transferase, C-terminal domain
BnaA06T0061000WE	0.166072	0.15357	0.465415	0.14863	3.11942	0.00797544	--	sucrose transport protein SUC4-like; K15378 solute carrier family 45, member 1/2/4 (A)	Sucrose transport protein SUC4 OS=Arabidopsis thaliana GN=SUC4 PE=1 SV=2	MFS/sugar transport protein
BnaA06T0066200WE	-0.324809	0.0257659	0.145607	0.311743	0.549396	0.00625432	GO:0005515	pre-mRNA-processing factor 17; K12816 pre-mRNA-processing factor 17 (A)	Pre-mRNA-processing factor 17 OS=Homo sapiens GN=CDC40 PE=1 SV=1	WD domain, G-beta repeat
BnaA06T0070800WE	-0.165201	0.27902	0.0168357	0.32515	0.853494	0.0112281	GO:0015031	secretory carrier-associated membrane protein 5; K19995 secretory carrier-associated membrane protein (A)	Secretory carrier-associated membrane protein 5 OS=Arabidopsis thaliana GN=SCAMP5 PE=2 SV=2	SCAMP family
BnaA06T0073900WE	0.589428	0.151918	0.0505043	0.124406	-0.659502	0.0109696	--	heat shock 70 kDa protein 16; K09489 heat shock 70kDa protein 4 (A)	Heat shock 70 kDa protein 16 OS=Arabidopsis thaliana GN=HSP70-16 PE=2 SV=1	Hsp70 protein
BnaA06T0076700WE	-1.18978	0.116262	0.301263	0.185893	0.773882	0.0284268	GO:0003676	heterogeneous nuclear ribonucleoprotein 87F-like; K14398 cleavage and polyadenylation specificity factor subunit 6/7 (A)	Cleavage and polyadenylation specificity factor subunit CG7185 OS=Drosophila melanogaster GN=CG7185 PE=1 SV=2	RNA recognition motif. (a.k.a. RRM, RBD, or RNP domain)
BnaA06T0091900WE	-0.044137	0.286516	-0.138156	0.182805	-1.43349	0.00327083	GO:0055085	UDP-galactose/UDP-glucose transporter 3; K15275 solute carrier family 35 (UDP-galactose transporter), member B1 (A)	UDP-galactose/UDP-glucose transporter 3 OS=Arabidopsis thaliana GN=UTR3 PE=1 SV=1	UAA transporter family
BnaA06T0092300WE	0.0630892	0.165251	0.704892	0.0336835	0.935365	0.0108314	GO:0005515	protein gar2; K14411 RNA-binding protein Musashi (A)	Protein IQ-DOMAIN 31 OS=Arabidopsis thaliana GN=IQD31 PE=1 SV=1	IQ calmodulin-binding motif
BnaA06T0094600WE	-0.0937127	0.271912	-0.111413	0.37279	-0.537488	0.0334144	GO:0003723	probable splicing factor 3A subunit 1; K12825 splicing factor 3A subunit 1 (A)	Probable splicing factor 3A subunit 1 OS=Arabidopsis thaliana GN=At1g14650 PE=1 SV=2	Ubiquitin family
BnaA06T0095400WE	0.272221	0.317371	0.864705	0.0108859	2.07116	0.0110403	GO:0016021	probable transmembrane ascorbate ferrireductase 3; K08360 cytochrome b-561 [EC:1.16.5.1] (A)	Probable transmembrane ascorbate ferrireductase 3 OS=Arabidopsis thaliana GN=CYB561C PE=2 SV=1	Eukaryotic cytochrome b561
BnaA06T0096100WE	0.417317	0.0526221	0.245072	0.00145697	0.839202	0.0165833	GO:0003942	aspartate-semialdehyde dehydrogenase-like; K00133 aspartate-semialdehyde dehydrogenase [EC:1.2.1.11] (A)	Aspartate-semialdehyde dehydrogenase OS=Synechocystis sp. (strain PCC 6803 / Kazusa) GN=asd PE=3 SV=2	Semialdehyde dehydrogenase, NAD binding domain
BnaA06T0099300WE	0.354065	0.278279	0.539936	0.0502816	0.994462	0.0130634	GO:0000166	YALI0F17996p; K08712 ATP-binding cassette, subfamily G (WHITE), member 2, SNQ2 (A)	ABC transporter G family member 35 OS=Arabidopsis thaliana GN=ABCG35 PE=2 SV=1	ABC-transporter extracellular N-terminal
BnaA06T0105200WE	0.497993	0.0146005	-0.368829	0.0605436	-1.10652	0.00409404	--	DCN1-like protein 4; K17824 DCN1-like protein 4/5 (A)	DCN1-like protein 4 OS=Mus musculus GN=Dcun1d4 PE=2 SV=1	double strand RNA binding domain from DEAD END PROTEIN 1
BnaA06T0114100WE	-0.151684	0.142069	-0.0233105	0.253108	-0.917107	0.000889892	GO:0003824	trifunctional UDP-glucose 4,6-dehydratase/UDP-4-keto-6-deoxy-D-glucose 3,5-epimerase/UDP-4-keto-L-rhamnose-reductase RHM1-like; K12450 UDP-glucose 4,6-dehydratase [EC:4.2.1.76] (A)	Trifunctional UDP-glucose 4,6-dehydratase/UDP-4-keto-6-deoxy-D-glucose 3,5-epimerase/UDP-4-keto-L-rhamnose-reductase RHM1 OS=Arabidopsis thaliana GN=RHM1 PE=1 SV=1	RmlD substrate binding domain
BnaA06T0115800WE	0.261276	0.0133928	-0.388964	0.0329279	-0.955709	0.00208143	--	glutathione S-transferase U24-like; K00799 glutathione S-transferase [EC:2.5.1.18] (A)	Glutathione S-transferase U24 OS=Arabidopsis thaliana GN=GSTU24 PE=2 SV=1	Glutathione S-transferase, C-terminal domain
BnaA06T0118900WE	0.0913596	0.135142	0.032981	0.24458	0.571504	0.0459752	--	--	Protein YLS9 OS=Arabidopsis thaliana GN=YLS9 PE=2 SV=1	Late embryogenesis abundant protein
BnaA06T0121300WE	-0.601086	0.0106863	-0.283808	0.0478783	-0.683264	0.0123883	--	transcription factor BTF3 homolog 4; K01527 nascent polypeptide-associated complex subunit beta (A)	Transcription factor BTF3 OS=Homo sapiens GN=BTF3 PE=1 SV=1	NAC domain
BnaA06T0130100WE	-0.462028	0.305375	0.629555	0.131679	1.73301	0.0212486	--	ITIH1; inter-alpha-trypsin inhibitor heavy chain 1; K19014 inter-alpha-trypsin inhibitor heavy chain H1 (A)	von Willebrand factor A domain-containing protein DDB_G0292028 OS=Dictyostelium discoideum GN=DDB_G0292028 PE=3 SV=1	von Willebrand factor type A domain
BnaA06T0133600WE	-0.189903	0.0849797	0.0684208	0.346141	-0.740165	0.0222179	--	leucoanthocyanidin reductase-like; K13081 leucoanthocyanidin reductase [EC:1.17.1.3] (A)	Isoflavone reductase homolog P3 OS=Arabidopsis thaliana GN=At1g75280 PE=2 SV=1	NmrA-like family
BnaA06T0136700WE	-0.377082	0.0293952	0.223573	0.316748	1.06661	0.0307851	GO:0005515	protein gar2; K14411 RNA-binding protein Musashi (A)	Protein IQ-DOMAIN 32 OS=Arabidopsis thaliana GN=IQD32 PE=1 SV=3	Protein of unknown function (DUF4005)
BnaA06T0140500WE	-0.335678	0.0100109	-0.659938	0.0301942	1.78081	0.00311288	GO:0006950	--	Dehydrin ERD10 OS=Arabidopsis thaliana GN=ERD10 PE=1 SV=1	Dehydrin
BnaA06T0143300WE	0.26721	0.229799	-0.200115	0.171771	0.79477	0.0168002	GO:0005509	uncharacterized calcium-binding protein C800.10c; K12472 epidermal growth factor receptor substrate 15 (A)	Uncharacterized calcium-binding protein C800.10c OS=Schizosaccharomyces pombe (strain 972 / ATCC 24843) GN=SPBC800.10c PE=3 SV=1	Cytoskeletal-regulatory complex EF hand
BnaA06T0145000WE	0.505703	0.0360681	-0.542043	0.0271765	-1.47358	0.00371015	GO:0003872	pyrophosphate--fructose 6-phosphate 1-phosphotransferase subunit alpha 1; K00895 pyrophosphate--fructose-6-phosphate 1-phosphotransferase [EC:2.7.1.90] (A)	Pyrophosphate--fructose 6-phosphate 1-phosphotransferase subunit alpha 1 OS=Arabidopsis thaliana GN=PFP-ALPHA1 PE=2 SV=1	Phosphofructokinase
BnaA06T0146600WE	-0.160538	0.260465	0.227104	0.24811	1.25429	0.0386244	GO:0000398	U1 small nuclear ribonucleoprotein A; K11091 U1 small nuclear ribonucleoprotein A (A)	Protein MATERNALLY EXPRESSED GENE 5 OS=Zea mays GN=MEG5 PE=2 SV=1	RNA recognition motif. (a.k.a. RRM, RBD, or RNP domain)
BnaA06T0149900WE	-0.411596	0.232315	0.0963763	0.224282	0.649413	0.0294204	GO:0005509	SORBIDRAFT_10g030940, Sb10g030940; hypothetical protein; K12472 epidermal growth factor receptor substrate 15 (A)	Uncharacterized calcium-binding protein C800.10c OS=Schizosaccharomyces pombe (strain 972 / ATCC 24843) GN=SPBC800.10c PE=3 SV=1	EF hand
BnaA06T0151000WE	-0.155056	0.0922805	0.123511	0.248366	-0.641204	0.020406	GO:0004298	proteasome subunit beta type-3-A; K02735 20S proteasome subunit beta 3 [EC:3.4.25.1] (A)	Proteasome subunit beta type-3-A OS=Arabidopsis thaliana GN=PBC1 PE=1 SV=2	Proteasome subunit
BnaA06T0155400WE	-0.277713	0.121841	0.309723	0.119408	0.802137	0.0393195	GO:0003676	serine/arginine-rich splicing factor SR34A-like; K12890 splicing factor, arginine/serine-rich 1/9 (A)	Serine/arginine-rich splicing factor SR34A OS=Arabidopsis thaliana GN=SR34A PE=2 SV=1	RNA recognition motif. (a.k.a. RRM, RBD, or RNP domain)
BnaA06T0163700WE	0.0530015	0.315294	0.140146	0.245115	1.15594	0.00370933	GO:0006508	KDEL-tailed cysteine endopeptidase CEP2; K16292 KDEL-tailed cysteine endopeptidase [EC:3.4.22.-] (A)	KDEL-tailed cysteine endopeptidase CEP2 OS=Arabidopsis thaliana GN=CEP2 PE=2 SV=1	Cathepsin propeptide inhibitor domain (I29)
BnaA06T0165500WE	-0.289679	0.277434	-0.363144	0.0411914	0.789163	0.0159064	--	--	--	NADH-ubiquinone reductase complex 1 MLRQ subunit
BnaA06T0167700WE	0.243734	0.0660935	0.00242605	0.223058	0.91049	0.0080341	--	--	--	--
BnaA06T0168300WE	0.412709	0.0896512	-0.504711	0.0474364	1.1849	0.0366512	GO:0000166	ABC transporter family protein; K05643 ATP-binding cassette, subfamily A (ABC1), member 3 (A)	ABC transporter A family member 4 OS=Arabidopsis thaliana GN=ABCA4 PE=3 SV=2	ABC-2 family transporter protein
BnaA06T0170300WE	-0.0640764	0.0826052	-0.224988	0.074614	-0.525481	0.00327247	GO:0006108	malate dehydrogenase, chloroplastic; K00026 malate dehydrogenase [EC:1.1.1.37] (A)	Malate dehydrogenase, chloroplastic OS=Arabidopsis thaliana GN=At3g47520 PE=1 SV=1	lactate/malate dehydrogenase, alpha/beta C-terminal domain
BnaA06T0180500WE	0.436438	0.0237514	0.0868926	0.147044	-0.53835	0.028554	GO:0004672	MPK3.1; mitogen-activated protein kinase 3; K04371 mitogen-activated protein kinase 1/3 [EC:2.7.11.24] (A)	Mitogen-activated protein kinase 3 OS=Arabidopsis thaliana GN=MPK3 PE=1 SV=2	Protein kinase domain
BnaA06T0182900WE	0.248393	0.311477	0.231746	0.0720942	1.44232	0.0113845	GO:0004185	serine carboxypeptidase-like 48; K16298 serine carboxypeptidase-like clade IV [EC:3.4.16.-] (A)	Serine carboxypeptidase-like 48 OS=Arabidopsis thaliana GN=SCPL48 PE=2 SV=2	Serine carboxypeptidase
BnaA06T0183000WE	-0.676441	0.223168	0.633107	0.0111055	1.79981	0.0109974	GO:0004553	probable xyloglucan endotransglucosylase/hydrolase protein 31; K08235 xyloglucan:xyloglucosyl transferase [EC:2.4.1.207] (A)	Xyloglucan endotransglucosylase/hydrolase protein 31 OS=Arabidopsis thaliana GN=XTH31 PE=1 SV=2	Xyloglucan endo-transglycosylase (XET) C-terminus
BnaA06T0184000WE	0.139656	0.0655886	0.0886781	0.244549	0.511556	0.0146851	GO:0003755	peptidyl-prolyl cis-trans isomerase CYP71-like; K12736 peptidylprolyl isomerase domain and WD repeat-containing protein 1 [EC:5.2.1.8] (A)	Peptidyl-prolyl cis-trans isomerase CYP71 OS=Arabidopsis thaliana GN=CYP71 PE=1 SV=1	WD domain, G-beta repeat
BnaA06T0185400WE	0.504182	0.10278	0.757879	0.101014	-0.627865	0.0133066	GO:0006886	protein transport protein Sec24-like CEF; K14007 protein transport protein SEC24 (A)	Protein transport protein Sec24-like CEF OS=Arabidopsis thaliana GN=CEF PE=2 SV=3	Gelsolin repeat
BnaA06T0186400WE	-0.11821	0.181932	0.637895	0.053652	-0.706316	0.0334963	GO:0016491	alternative NAD(P)H-ubiquinone oxidoreductase C1, chloroplastic/mitochondrial; K17872 NADH:ubiquinone reductase (non-electrogenic) [EC:1.6.5.9] (A)	Apoptosis-inducing factor homolog A OS=Dictyostelium discoideum GN=aifA PE=3 SV=1	Pyridine nucleotide-disulphide oxidoreductase
BnaA06T0197200WE	0.0677563	0.361982	-0.48419	0.0168438	-0.82247	0.00744157	GO:0005524	atpA, BRNAC_p006; ATP synthase CF1 alpha subunit; K02111 F-type H+-transporting ATPase subunit alpha [EC:3.6.3.14] (A)	ATP synthase subunit alpha, chloroplastic OS=Arabidopsis thaliana GN=atpA PE=1 SV=1	ATP synthase alpha/beta family, beta-barrel domain
BnaA06T0262000WE	0.0324299	0.321385	-2.3739	0.267925	1.57828	0.0158263	GO:0004857	pectinesterase-like; K01051 pectinesterase [EC:3.1.1.11] (A)	Probable pectinesterase/pectinesterase inhibitor 34 OS=Arabidopsis thaliana GN=PME34 PE=2 SV=1	Plant invertase/pectin methylesterase inhibitor
BnaA06T0265000WE	-0.0644944	0.0525093	-0.440773	0.0036702	-0.662769	0.00256256	GO:0005509	calnexin homolog 1; K08054 calnexin (A)	Calnexin homolog 1 OS=Arabidopsis thaliana GN=CNX1 PE=1 SV=1	Calreticulin family
BnaA06T0265500WE	-0.0952734	0.180268	-0.113466	0.0359282	0.608644	0.00650286	--	hypothetical protein; K02366 glucuronyl/N-acetylglucosaminyl transferase EXT1 [EC:2.4.1.224 2.4.1.225] (A)	Probable beta-1,4-xylosyltransferase IRX10L OS=Arabidopsis thaliana GN=IRX10L PE=2 SV=1	Exostosin family
BnaA06T0269400WE	0.0674889	0.388044	-0.231773	0.162749	-0.570375	0.00891509	--	glutamine--tRNA ligase-like; K01886 glutaminyl-tRNA synthetase [EC:6.1.1.18] (A)	--	Eukaryotic mitochondrial regulator protein
BnaA06T0271000WE	1.20748	0.128467	0.417663	0.232312	-1.39853	0.0174342	--	pus4; tRNA pseudouridine synthase mitochondrial precursor; K01855 tRNA pseudouridine38/39 synthase [EC:5.4.99.45] (A)	Protein DCL, chloroplastic OS=Solanum lycopersicum GN=DCL PE=2 SV=1	Protein of unknown function (DUF3223)
BnaA06T0275600WE	-0.635898	0.00398102	0.510516	0.0136044	1.12113	0.0151275	GO:0005215	nucleobase-ascorbate transporter 6-like; K14611 solute carrier family 23 (nucleobase transporter), member 1/2 (A)	Nucleobase-ascorbate transporter 6 OS=Arabidopsis thaliana GN=NAT6 PE=2 SV=2	Permease family
BnaA06T0281000WE	-0.332365	0.0429078	0.600776	0.0132191	2.14892	0.00420565	GO:0016747	omega-hydroxypalmitate O-feruloyl transferase; K15400 omega-hydroxypalmitate O-feruloyl transferase [EC:2.3.1.188] (A)	Omega-hydroxypalmitate O-feruloyl transferase OS=Arabidopsis thaliana GN=HHT1 PE=1 SV=1	Transferase family
BnaA06T0282100WE	-0.0265935	0.0627304	-0.103642	0.290889	-0.802389	0.00216248	GO:0000287	pyruvate kinase, cytosolic isozyme-like; K00873 pyruvate kinase [EC:2.7.1.40] (A)	Pyruvate kinase, cytosolic isozyme OS=Glycine max PE=2 SV=1	Pyruvate kinase, alpha/beta domain
BnaA06T0287000WE	-0.554701	0.0870793	0.363672	0.126688	1.26999	0.0344642	GO:0003676	serine/arginine-rich splicing factor SC35; K12891 splicing factor, arginine/serine-rich 2 (A)	Serine/arginine-rich splicing factor SC35 OS=Arabidopsis thaliana GN=SC35 PE=1 SV=1	RNA recognition motif. (a.k.a. RRM, RBD, or RNP domain)
BnaA06T0288600WE	-0.143587	0.260085	-0.115875	0.0406762	-0.746996	0.00529774	GO:0003677	DNA polymerase V; K02331 DNA polymerase phi [EC:2.7.7.7] (A)	DNA polymerase V OS=Schizosaccharomyces pombe (strain 972 / ATCC 24843) GN=pol5 PE=1 SV=2	DNA polymerase phi
BnaA06T0302400WE	-0.466202	0.197246	0.429095	0.0292054	1.37482	0.0236577	GO:0004601	peroxidase 44-like; K00430 peroxidase [EC:1.11.1.7] (A)	Peroxidase 44 OS=Arabidopsis thaliana GN=PER44 PE=2 SV=1	Peroxidase
BnaA06T0306000WE	0.762399	0.0434725	-0.162382	0.0312276	-0.773377	0.0052142	--	40S ribosomal protein S10-1-like; K02947 small subunit ribosomal protein S10e (A)	40S ribosomal protein S10-1 OS=Arabidopsis thaliana GN=RPS10A PE=2 SV=1	Plectin/S10 domain
BnaA06T0309700WE	-0.600276	0.0543743	-0.297547	0.179192	0.911129	0.0125302	--	actin-1-like; K10355 actin, other eukaryote (A)	Actin-3 OS=Arabidopsis thaliana GN=ACT3 PE=1 SV=1	Actin
BnaA06T0328400WE	-0.0243153	0.134282	0.459343	0.163502	0.538373	0.00221629	GO:0004672	calcium-dependent protein kinase 3-like; K13412 calcium-dependent protein kinase [EC:2.7.11.1] (A)	Calcium-dependent protein kinase 3 OS=Arabidopsis thaliana GN=CPK3 PE=1 SV=1	EF-hand domain pair
BnaA06T0330000WE	0.007611	0.355164	-0.635913	0.132901	-0.934724	0.0344719	GO:0009058	cystine lyase CORI3-like; K00815 tyrosine aminotransferase [EC:2.6.1.5] (A)	Cystine lyase CORI3 OS=Arabidopsis thaliana GN=CORI3 PE=1 SV=1	Aminotransferase class I and II
BnaA06T0339200WE	-0.0285478	0.255686	0.559935	0.0385002	0.871292	0.00345405	GO:0004672	receptor protein kinase CLAVATA1; K00924 [EC:2.7.1.-] (A)	Leucine-rich repeat receptor-like serine/threonine-protein kinase BAM1 OS=Arabidopsis thaliana GN=BAM1 PE=1 SV=1	Leucine rich repeat N-terminal domain
BnaA06T0339700WE	-0.33419	0.0150606	0.492993	0.000338022	0.768766	0.00723028	GO:0004591	2-oxoglutarate dehydrogenase, mitochondrial-like; K00164 2-oxoglutarate dehydrogenase E1 component [EC:1.2.4.2] (A)	2-oxoglutarate dehydrogenase, mitochondrial OS=Dictyostelium discoideum GN=ogdh PE=3 SV=1	Dehydrogenase E1 component
BnaA06T0339800WE	0.122979	0.255082	-0.230313	0.164575	0.810166	0.0160413	GO:0006508	lysosomal Pro-X carboxypeptidase-like; K01285 lysosomal Pro-X carboxypeptidase [EC:3.4.16.2] (A)	Protein CROWDED NUCLEI 4 OS=Arabidopsis thaliana GN=CRWN4 PE=1 SV=2	Serine carboxypeptidase S28
BnaA06T0341800WE	-0.0686195	0.290031	0.32622	0.0313998	1.048	0.00301728	GO:0005525	ADP-ribosylation factor-like protein 8A; K07955 ADP-ribosylation factor-like protein 8 (A)	ADP-ribosylation factor-like protein 8A OS=Xenopus tropicalis GN=arl8a PE=2 SV=1	ADP-ribosylation factor family
BnaA06T0343600WE	0.041759	0.316385	0.144998	0.212806	-0.831038	0.0263796	GO:0000398	small nuclear ribonucleoprotein E-like; K11097 small nuclear ribonucleoprotein E (A)	Small nuclear ribonucleoprotein E OS=Danio rerio GN=snrpe PE=3 SV=1	LSM domain
BnaA06T0344900WE	0.4406	0.13475	1.05288	0.00758359	3.36497	0.0105536	--	monoacylglycerol lipase abhd6-A-like; K13700 abhydrolase domain-containing protein 6 [EC:3.1.1.23] (A)	Epoxide hydrolase 3 OS=Xenopus tropicalis GN=ephx3 PE=2 SV=1	Alpha/beta hydrolase family
BnaA06T0346000WE	0.810322	0.0107286	-0.561724	0.0122959	-0.725113	0.0084886	GO:0016853	peptidyl-prolyl cis-trans isomerase Pin1; K09578 peptidyl-prolyl cis-trans isomerase NIMA-interacting 1 [EC:5.2.1.8] (A)	Peptidyl-prolyl cis-trans isomerase Pin1 OS=Arabidopsis thaliana GN=PIN1 PE=1 SV=1	PPIC-type PPIASE domain
BnaA06T0351200WE	-0.576085	0.0488626	-0.302047	0.32923	2.11565	0.0295158	GO:0016998	Os03g0133400; K13473 chitin elicitor-binding protein (A)	LysM domain-containing GPI-anchored protein 2 OS=Arabidopsis thaliana GN=LYM2 PE=1 SV=1	LysM domain
BnaA06T0352800WE	-0.354453	0.039955	0.627022	0.00417898	1.337	0.00865664	GO:0005515	LRR receptor-like serine/threonine-protein kinase EFR; K13420 LRR receptor-like serine/threonine-protein kinase FLS2 [EC:2.7.11.1] (A)	Leucine-rich repeat receptor-like protein kinase PXC2 OS=Arabidopsis thaliana GN=PXC2 PE=2 SV=1	Leucine rich repeat N-terminal domain
BnaA06T0354200WE	0.420316	0.236701	0.189649	0.0835717	-0.575283	0.0452804	GO:0031047	probable mediator of RNA polymerase II transcription subunit 37c; K03283 heat shock 70kDa protein 1/8 (A)	Protein SUPPRESSOR OF GENE SILENCING 3 OS=Arabidopsis thaliana GN=SGS3 PE=1 SV=1	XS domain
BnaA06T0371400WE	0.114639	0.216838	-0.213535	0.101367	-0.854676	0.0055233	GO:0004325	ferrochelatase-1, chloroplastic/mitochondrial; K01772 ferrochelatase [EC:4.99.1.1] (A)	Ferrochelatase-1, chloroplastic/mitochondrial OS=Arabidopsis thaliana GN=HEM15 PE=2 SV=1	Ferrochelatase
BnaA06T0372400WE	0.101179	0.359277	0.530904	0.07699	0.616517	0.0215645	GO:0005515	nucleosome-remodeling factor subunit NURF301; K11728 nucleosome-remodeling factor subunit BPTF (A)	PHD finger protein ALFIN-LIKE 4 OS=Arabidopsis thaliana GN=AL4 PE=1 SV=2	PHD-finger
BnaA06T0396200WE	0.0700526	0.00937724	0.00617455	0.383069	0.593615	0.0041505	GO:0009058	glucose-1-phosphate adenylyltransferase small subunit, chloroplastic; K00975 glucose-1-phosphate adenylyltransferase [EC:2.7.7.27] (A)	Glucose-1-phosphate adenylyltransferase small subunit, chloroplastic OS=Arabidopsis thaliana GN=APS1 PE=2 SV=2	Nucleotidyl transferase
BnaA06T0401100WE	-0.202027	0.198751	-1.25267	0.0254187	-2.53096	0.0106633	--	--	--	NADH-ubiquinone reductase complex 1 MLRQ subunit
BnaA06T0405000WE	0.175837	0.150279	-0.104681	0.247026	0.59865	0.036835	--	--	Protein AIG2 OS=Arabidopsis thaliana GN=AIG2 PE=2 SV=1	Gamma-glutamyl cyclotransferase, AIG2-like
BnaA06T0411400WE	0.157465	0.368818	-0.696349	0.0372522	0.714434	0.0429758	--	PTI1-like tyrosine-kinase; K13436 pto-interacting protein 1 [EC:2.7.11.1] (A)	NADPH:quinone oxidoreductase OS=Arabidopsis thaliana GN=NQR PE=1 SV=1	NADPH-dependent FMN reductase
BnaA06T0415600WE	0.0456847	0.263938	-0.701326	0.0277352	0.568471	0.0301591	GO:0005515	tether containing UBX domain for GLUT4; K15627 tether containing UBX domain for GLUT4 (A)	Plant UBX domain-containing protein 1 OS=Arabidopsis thaliana GN=PUX1 PE=1 SV=1	UBX domain
BnaA06T0416400WE	-0.083652	0.381682	-0.956896	0.00323872	1.72277	0.00290546	GO:0005507	--	Mavicyanin OS=Cucurbita pepo PE=1 SV=1	Plastocyanin-like domain
BnaA06T0418800WE	0.518763	0.324653	1.27992	0.0153347	1.3867	0.018565	GO:0008152	zerumbone synthase; K09841 xanthoxin dehydrogenase [EC:1.1.1.288] (A)	Short-chain dehydrogenase reductase 2a OS=Arabidopsis thaliana GN=SDR2a PE=3 SV=1	short chain dehydrogenase
BnaA06T0419100WE	0.105383	0.285856	0.317973	0.0226684	0.793526	0.00197108	GO:0004553	lysosomal alpha-mannosidase; K01191 alpha-mannosidase [EC:3.2.1.24] (A)	Alpha-mannosidase OS=Canavalia ensiformis PE=1 SV=1	Alpha mannosidase middle domain
BnaA06T0435300WE	-0.176131	0.0270078	0.116127	0.193306	1.33454	0.00309522	GO:0005215	hypothetical protein; K14638 solute carrier family 15 (peptide/histidine transporter), member 3/4 (A)	Protein NRT1/ PTR FAMILY 8.3 OS=Arabidopsis thaliana GN=NPF8.3 PE=1 SV=1	POT family
BnaA06T0443700WE	-0.30984	0.0518746	0.14137	0.362988	0.708649	0.00636793	GO:0008299	farnesyl pyrophosphate synthase 1, mitochondrial; K00787 farnesyl diphosphate synthase [EC:2.5.1.1 2.5.1.10] (A)	Farnesyl pyrophosphate synthase 1, mitochondrial OS=Arabidopsis thaliana GN=FPS1 PE=2 SV=2	Polyprenyl synthetase
BnaA06T0450500WE	0.221955	0.0579924	0.199923	0.365951	0.960064	0.00608456	GO:0005515	syntaxin-22; K08488 syntaxin 7 (A)	Syntaxin-22 OS=Arabidopsis thaliana GN=SYP22 PE=1 SV=1	SNARE domain
BnaA06T0451200WE	-0.280241	0.0603145	0.293465	0.0103491	0.601408	0.000745136	--	abscisic acid receptor PYR1-like; K14496 abscisic acid receptor PYR/PYL family (A)	Abscisic acid receptor PYL1 OS=Arabidopsis thaliana GN=PYL1 PE=1 SV=1	Polyketide cyclase / dehydrase and lipid transport
BnaA06T0451400WE	-0.938742	0.0247209	-0.0938011	0.196194	4.22213	0.00980834	GO:0004857	--	Putative invertase inhibitor OS=Platanus acerifolia PE=1 SV=1	Plant invertase/pectin methylesterase inhibitor
BnaA06T0451600WE	-0.506662	0.0816885	0.299484	0.061843	0.968146	0.013043	GO:0008060	probable ADP-ribosylation factor GTPase-activating protein AGD9; K12493 ADP-ribosylation factor GTPase-activating protein 2/3 (A)	Probable ADP-ribosylation factor GTPase-activating protein AGD9 OS=Arabidopsis thaliana GN=AGD9 PE=1 SV=1	Putative GTPase activating protein for Arf
BnaA06T0455100WE	2.16235	0.218758	-0.542061	0.0604327	-0.823992	0.015129	GO:0003735	50S ribosomal protein HLP, mitochondrial; K02874 large subunit ribosomal protein L14 (A)	50S ribosomal protein HLP, mitochondrial OS=Arabidopsis thaliana GN=HLP PE=2 SV=1	Ribosomal protein L14p/L23e
BnaA06T0462100WE	-0.375423	0.0191512	-0.761567	0.145271	-1.19191	0.0480827	--	ALAD; aminolevulinate dehydratase; K01698 porphobilinogen synthase [EC:4.2.1.24] (A)	Haloacid dehalogenase-like hydrolase domain-containing protein 3 OS=Mus musculus GN=Hdhd3 PE=1 SV=1	Haloacid dehalogenase-like hydrolase
BnaA06T0462800WE	-0.186209	0.0495414	0.400036	0.0457024	1.96103	0.00659034	--	ubiquitin carboxyl-terminal hydrolase 9-like; K11855 ubiquitin carboxyl-terminal hydrolase 36/42 [EC:3.4.19.12] (A)	CASP-like protein 1B1 OS=Arabidopsis thaliana GN=At5g44550 PE=1 SV=1	Domain of unknown function (DUF588)
BnaA06T0464400WE	-0.289989	0.0275119	0.637815	0.105093	-0.668264	0.00537835	GO:0003743	eukaryotic translation initiation factor 3 subunit D; K03251 translation initiation factor 3 subunit D (A)	Eukaryotic translation initiation factor 3 subunit D OS=Arabidopsis thaliana GN=TIF3D1 PE=1 SV=1	Eukaryotic translation initiation factor 3 subunit 7 (eIF-3)
BnaA06T0466200WE	-0.548763	0.253084	-0.291472	0.362588	2.11543	0.021677	GO:0016020	cellulose synthase A catalytic subunit 4 [UDP-forming]; K10999 cellulose synthase A [EC:2.4.1.12] (A)	Cellulose synthase A catalytic subunit 4 [UDP-forming] OS=Arabidopsis thaliana GN=CESA4 PE=1 SV=1	Zinc-binding RING-finger
BnaA06T0467300WE	-0.437435	0.0493964	0.424666	0.0618035	0.533643	0.018087	GO:0003774	myosin-6; K10357 myosin V (A)	Myosin-6 OS=Arabidopsis thaliana GN=XI-2 PE=1 SV=1	Myosin N-terminal SH3-like domain
BnaA06T0468200WE	0.438648	0.0204678	0.588423	0.0162598	1.05234	0.00138638	GO:0004781	ATP sulfurylase 4, chloroplastic; K13811 3'-phosphoadenosine 5'-phosphosulfate synthase [EC:2.7.7.4 2.7.1.25] (A)	ATP sulfurylase 4, chloroplastic OS=Arabidopsis thaliana GN=APS4 PE=2 SV=1	PUA-like domain
BnaA06T0469000WE	-0.0566523	0.132272	-0.0645517	0.16315	1.11603	0.0204545	GO:0008152	ureidoglycolate hydrolase; K18151 ureidoglycolate amidohydrolase [EC:3.5.1.116] (A)	Ureidoglycolate hydrolase OS=Arabidopsis thaliana GN=UAH PE=1 SV=1	Peptidase family M20/M25/M40
BnaA06T0469500WE	-0.506742	0.00524532	-0.0112054	0.0251025	-1.12171	0.000552507	--	--	--	--
BnaA06T0473100WE	0.237613	0.0996278	0.316717	0.154758	1.36287	0.0121415	GO:0004553	Glucan endo-1,3-beta-glucosidase precursor, putative (EC:3.2.1.39); K19891 glucan endo-1,3-beta-glucosidase 1/2/3 [EC:3.2.1.39] (A)	Glucan endo-1,3-beta-glucosidase 7 OS=Arabidopsis thaliana GN=At4g34480 PE=1 SV=2	Glycosyl hydrolases family 17
BnaA06T0479100WE	0.221607	0.178086	0.858254	0.0305947	1.58235	0.0322882	GO:0030001	heavy metal-associated isoprenylated plant protein 26-like; K10752 histone-binding protein RBBP4 (A)	Heavy metal-associated isoprenylated plant protein 26 OS=Arabidopsis thaliana GN=HIPP26 PE=1 SV=1	Heavy-metal-associated domain
BnaA07T0004700WE	0.779498	0.0362387	0.0530071	0.302559	-0.659012	0.00703472	GO:0046872	non-transporter ABC protein (ISS); K06185 ATP-binding cassette, subfamily F, member 2 (A)	Zinc finger CCCH domain-containing protein 21 OS=Arabidopsis thaliana GN=At2g20280 PE=3 SV=1	--
BnaA07T0005400WE	-0.0286244	0.328267	0.86484	0.0232844	1.36766	0.00360187	GO:0016021	tetraspanin-19; K17345 tetraspanin-5 (A)	Tetraspanin-18 OS=Arabidopsis thaliana GN=TOM2AH2 PE=2 SV=1	Tetraspanin family
BnaA07T0005600WE	-0.0897715	0.0371858	0.0660186	0.126796	0.840545	0.012608	GO:0005515	CLIP-associated protein; K16578 CLIP-associating protein 1/2 (A)	CLIP-associated protein OS=Arabidopsis thaliana GN=CLASP PE=1 SV=1	HEAT-like repeat
BnaA07T0008700WE	0.262144	0.162091	-0.354728	0.035494	-1.37092	0.00126385	GO:0003779	profilin-1; K05759 profilin (A)	Profilin-1 OS=Arabidopsis thaliana GN=PRO1 PE=1 SV=1	Profilin
BnaA07T0010000WE	-0.186726	0.360714	-0.642662	0.318918	-0.710283	0.017409	GO:0004126	cytidine deaminase 1; K01489 cytidine deaminase [EC:3.5.4.5] (A)	Cytidine deaminase 1 OS=Arabidopsis thaliana GN=CDA1 PE=1 SV=1	Cytidine and deoxycytidylate deaminase zinc-binding region
BnaA07T0015100WE	0.807672	0.341049	0.0702298	0.0824307	-1.01275	0.0111487	GO:0005515	WD repeat-containing protein 75; K14552 NET1-associated nuclear protein 1 (U3 small nucleolar RNA-associated protein 17) (A)	WD repeat-containing protein 75 OS=Danio rerio GN=wdr75 PE=2 SV=2	WD domain, G-beta repeat
BnaA07T0016200WE	0.0806591	0.163727	0.513994	0.0270184	1.37444	0.00628284	GO:0004143	diacylglycerol kinase 3; K00901 diacylglycerol kinase (ATP) [EC:2.7.1.107] (A)	Diacylglycerol kinase 3 OS=Arabidopsis thaliana GN=DGK3 PE=2 SV=1	Diacylglycerol kinase catalytic domain
BnaA07T0024500WE	-0.202626	0.137816	0.615217	0.0713767	0.711468	0.0019486	GO:0016491	RNA demethylase ALKBH5-like; K10767 alkylated DNA repair protein alkB homolog 5 [EC:1.14.11.-] (A)	RNA demethylase ALKBH5 OS=Xenopus tropicalis GN=alkbh5 PE=2 SV=1	2OG-Fe(II) oxygenase superfamily
BnaA07T0027200WE	-0.219906	0.0646177	-0.062031	0.223745	-0.944783	0.000115738	GO:0005506	prolyl 4-hydroxylase 5-like; K00472 prolyl 4-hydroxylase [EC:1.14.11.2] (A)	Prolyl 4-hydroxylase 5 OS=Arabidopsis thaliana GN=P4H5 PE=2 SV=1	2OG-Fe(II) oxygenase superfamily
BnaA07T0032500WE	-0.913084	0.150881	0.171951	0.128857	1.46578	0.00573424	GO:0016998	Os03g0133400; K13473 chitin elicitor-binding protein (A)	LysM domain-containing GPI-anchored protein 2 OS=Arabidopsis thaliana GN=LYM2 PE=1 SV=1	LysM domain
BnaA07T0039200WE	-0.407515	0.183294	-1.17145	0.00183134	-2.24272	0.0142419	--	--	--	--
BnaA07T0041500WE	0.471339	0.018426	-0.318863	0.196038	-1.88782	0.000584612	GO:0016491	ferredoxin--nitrite reductase, chloroplastic; K00366 ferredoxin-nitrite reductase [EC:1.7.7.1] (A)	Ferredoxin--nitrite reductase, chloroplastic OS=Arabidopsis thaliana GN=NIR1 PE=1 SV=1	Nitrite/Sulfite reductase ferredoxin-like half domain
BnaA07T0041900WE	-0.0356846	0.219336	-0.429447	0.0356309	0.642792	0.0114417	GO:0006662	thioredoxin M3, chloroplastic-like; K03671 thioredoxin 1 (A)	Thioredoxin M3, chloroplastic OS=Arabidopsis thaliana GN=GAT1 PE=2 SV=2	Thioredoxin
BnaA07T0043300WE	-0.169188	0.148732	0.181277	0.178471	-0.835754	0.00722487	--	--	PRKR-interacting protein 1 OS=Pongo abelii GN=PRKRIP1 PE=2 SV=1	Protein of unknown function (DUF1168)
BnaA07T0052600WE	-0.105154	0.219646	0.625539	0.0070499	0.607128	0.0323213	GO:0004252	peptidase, putative (EC:3.4.21.25); K18443 golgi-specific brefeldin A-resistance guanine nucleotide exchange factor 1 (A)	Subtilisin-like protease SBT1.7 OS=Arabidopsis thaliana GN=SBT1.7 PE=1 SV=1	Peptidase inhibitor I9
BnaA07T0053900WE	0.27228	0.258096	0.429854	0.115099	0.516746	0.0136323	GO:0005515	--	Vacuolar protein-sorting-associated protein 11 homolog OS=Arabidopsis thaliana GN=VPS11 PE=1 SV=1	Vacuolar protein sorting protein 11 C terminal
BnaA07T0055400WE	0.0943721	0.246466	-0.0437128	0.232439	-0.517782	0.0316371	--	--	--	--
BnaA07T0056000WE	-0.332861	0.312776	-0.0332764	0.233809	0.770519	0.0096181	GO:0009058	AGPS, AGPase; glucose-1-phosphate adenylyltransferase small subunit, chloroplastic; K00975 glucose-1-phosphate adenylyltransferase [EC:2.7.7.27] (A)	Glucose-1-phosphate adenylyltransferase small subunit, chloroplastic OS=Brassica napus GN=AGPS1 PE=2 SV=1	Nucleotidyl transferase
BnaA07T0056700WE	0.0899776	0.151273	-0.0384314	0.171394	-0.523826	0.00503407	GO:0003735	60S ribosomal protein L5-1; K02932 large subunit ribosomal protein L5e (A)	60S ribosomal protein L5-1 OS=Arabidopsis thaliana GN=ATL5 PE=2 SV=2	Ribosomal L18 C-terminal region
BnaA07T0066000WE	-0.0493831	0.138872	0.202681	0.351719	1.06313	0.0388006	GO:0000272	beta-amylase 1, chloroplastic; K01177 beta-amylase [EC:3.2.1.2] (A)	Beta-amylase 1, chloroplastic OS=Arabidopsis thaliana GN=BAM1 PE=1 SV=1	Glycosyl hydrolase family 14
BnaA07T0068700WE	0.0762315	0.156799	-0.0780084	0.163381	0.607944	0.0164657	GO:0005515	ubiquinone biosynthesis monooxygenase COQ6; K06126 ubiquinone biosynthesis monooxygenase Coq6 [EC:1.14.13.-] (A)	Ubiquinone biosynthesis monooxygenase COQ6, mitochondrial OS=Xenopus tropicalis GN=coq6 PE=2 SV=1	FAD binding domain
BnaA07T0072100WE	0.306787	0.0229369	-0.157284	0.23183	-0.781818	0.0040692	--	ribosome production factor 2 homolog; K14847 ribosome production factor 2 (A)	Ribosome production factor 2 homolog OS=Arabidopsis thaliana GN=At3g23620 PE=2 SV=1	Brix domain
BnaA07T0073200WE	0.115202	0.224389	-0.322237	0.219604	-0.519228	0.0489855	GO:0008824	cyanate hydratase; K01725 cyanate lyase [EC:4.2.1.104] (A)	Cyanate hydratase OS=Arabidopsis thaliana GN=CYN PE=2 SV=1	Cyanate lyase C-terminal domain
BnaA07T0073300WE	0.00510569	0.354734	-0.184968	0.24624	-0.72562	0.0267515	--	uricase-like; K00365 urate oxidase [EC:1.7.3.3] (A)	Uricase OS=Arabidopsis thaliana GN=At2g26230 PE=1 SV=2	Uricase
BnaA07T0086300WE	-0.0598803	0.265632	0.577055	0.00765551	1.7882	0.00938216	--	--	--	AWPM-19-like family
BnaA07T0090500WE	0.495775	0.116245	-0.0359316	0.216762	1.19045	0.0354568	GO:0006629	Zeta-carotene desaturase, chloroplast precursor, putative (EC:1.14.99.30); K00514 zeta-carotene desaturase [EC:1.3.5.6] (A)	GDSL esterase/lipase At1g28580 OS=Arabidopsis thaliana GN=At1g28580 PE=2 SV=1	GDSL-like Lipase/Acylhydrolase
BnaA07T0093800WE	-0.085687	0.192915	0.247103	0.0875849	1.45958	0.0139442	--	indole-3-acetic acid-amido synthetase GH3.17; K14487 auxin responsive GH3 gene family (A)	Indole-3-acetic acid-amido synthetase GH3.17 OS=Arabidopsis thaliana GN=GH3.17 PE=1 SV=1	GH3 auxin-responsive promoter
BnaA07T0096700WE	0.213161	0.111526	-0.0021776	0.251599	-1.20745	0.00108312	GO:0003735	60S ribosomal protein L17-1; K02880 large subunit ribosomal protein L17e (A)	60S ribosomal protein L17-1 OS=Arabidopsis thaliana GN=RPL17A PE=2 SV=1	Ribosomal protein L22p/L17e
BnaA07T0096800WE	-0.201402	0.145911	-0.943021	0.00251468	-0.799764	0.00149277	GO:0003676	glycine-rich protein 2; K09250 cellular nucleic acid-binding protein (A)	Cold shock domain-containing protein 4 OS=Arabidopsis thaliana GN=CSP4 PE=1 SV=1	Zinc knuckle
BnaA07T0112500WE	-0.159191	0.0753882	0.0472597	0.206801	0.846948	0.0214825	--	mediator of RNA polymerase II transcription subunit 23; K15166 mediator of RNA polymerase II transcription subunit 23 (A)	Mediator of RNA polymerase II transcription subunit 23 OS=Arabidopsis thaliana GN=MED23 PE=1 SV=1	Mediator complex subunit 23
BnaA07T0117400WE	0.276788	0.0235235	-0.53816	0.0163603	-0.519459	0.0141372	GO:0019904	14-3-3-like protein GF14 omega; K06630 14-3-3 protein epsilon (A)	14-3-3-like protein GF14 omega OS=Arabidopsis thaliana GN=GRF2 PE=2 SV=2	14-3-3 protein
BnaA07T0117500WE	-0.7569	0.0257008	-0.562296	0.0225587	-0.587748	0.00987243	GO:0003676	hypothetical protein; K12741 heterogeneous nuclear ribonucleoprotein A1/A3 (A)	Probable RNA-binding protein ARP1 OS=Arabidopsis thaliana GN=ARP1 PE=2 SV=1	RNA recognition motif. (a.k.a. RRM, RBD, or RNP domain)
BnaA07T0121200WE	1.99545	0.0124848	2.16633	0.174128	-0.668312	0.00138759	GO:0005509	SORBIDRAFT_10g030940, Sb10g030940; hypothetical protein; K12472 epidermal growth factor receptor substrate 15 (A)	EH domain-containing protein 2 OS=Arabidopsis thaliana GN=EHD2 PE=1 SV=1	EF hand
BnaA07T0131600WE	-0.929917	0.151197	0.358882	0.373928	1.06127	0.0372446	--	X-linked retinitis pigmentosa GTPase regulator-like; K19607 X-linked retinitis pigmentosa GTPase regulator (A)	Protein RCC2 OS=Homo sapiens GN=RCC2 PE=1 SV=2	Regulator of chromosome condensation (RCC1) repeat
BnaA07T0134000WE	-1.09361	0.0505497	0.0589388	0.381558	0.941079	0.0488663	GO:0004252	peptidase, putative (EC:3.4.21.25); K18443 golgi-specific brefeldin A-resistance guanine nucleotide exchange factor 1 (A)	Subtilisin-like protease SBT1.7 OS=Arabidopsis thaliana GN=SBT1.7 PE=1 SV=1	PA domain
BnaA07T0136700WE	0.0985329	0.225143	0.324768	0.0856693	0.999846	0.019039	--	hypothetical protein; K13110 microfibrillar-associated protein 1 (A)	PI-PLC X domain-containing protein At5g67130 OS=Arabidopsis thaliana GN=At5g67130 PE=1 SV=1	--
BnaA07T0141800WE	0.20165	0.328219	-0.0854017	0.232865	-0.950438	0.0450112	--	U3 small nucleolar ribonucleoprotein protein MPP10; K14559 U3 small nucleolar RNA-associated protein MPP10 (A)	--	Mpp10 protein
BnaA07T0142000WE	0.162152	0.206522	0.118313	0.221919	-0.621337	0.0128365	GO:0005975	putative glucose-6-phosphate 1-epimerase; K01792 glucose-6-phosphate 1-epimerase [EC:5.1.3.15] (A)	Putative glucose-6-phosphate 1-epimerase OS=Cenchrus ciliaris PE=2 SV=1	Aldose 1-epimerase
BnaA07T0142200WE	-0.173774	0.00996946	-0.0345625	0.152347	-1.02161	0.00939795	--	dynactin subunit p25-like; K10427 dynactin 5 (A)	Gamma carbonic anhydrase 3, mitochondrial OS=Arabidopsis thaliana GN=GAMMACA3 PE=1 SV=1	Bacterial transferase hexapeptide (six repeats)
BnaA07T0145700WE	-0.102915	0.245354	0.0209483	0.242226	0.656677	0.0228049	--	dnaJ homolog subfamily C GRV2; K09533 DnaJ homolog subfamily C member 13 (A)	DnaJ homolog subfamily C GRV2 OS=Arabidopsis thaliana GN=GRV2 PE=1 SV=1	Domain of unknown function (DUF4339)
BnaA07T0146400WE	-0.138151	0.0299421	0.309088	0.00742717	0.948746	0.00647648	GO:0005515	protein argonaute 4-like; K11593 eukaryotic translation initiation factor 2C (A)	Protein argonaute 4 OS=Arabidopsis thaliana GN=AGO4 PE=1 SV=2	Argonaute linker 1 domain
BnaA07T0148800WE	0.747127	0.00645905	-0.969559	0.0126114	-1.28193	0.0139607	GO:0009055	ferredoxin, root R-B1; K02639 ferredoxin (A)	Ferredoxin-3, chloroplastic OS=Arabidopsis thaliana GN=FD3 PE=1 SV=1	2Fe-2S iron-sulfur cluster binding domain
BnaA07T0149800WE	-0.0299107	0.12061	-0.49518	0.0120493	0.587265	0.0264893	--	--	Uncharacterized protein At2g27730, mitochondrial OS=Arabidopsis thaliana GN=At2g27730 PE=1 SV=1	--
BnaA07T0157000WE	-0.193743	0.341566	0.687236	0.0960836	1.18949	0.00268829	GO:0000786	histone H2B.3; K11252 histone H2B (A)	Histone H2B.3 OS=Arabidopsis thaliana GN=At2g28720 PE=1 SV=3	Core histone H2A/H2B/H3/H4
BnaA07T0158100WE	0.121648	0.177837	0.0964628	0.324194	0.885444	0.021044	--	hypothetical protein; K17795 mitochondrial import inner membrane translocase subunit TIM17 (A)	Outer envelope pore protein 16-1, chloroplastic OS=Arabidopsis thaliana GN=OEP161 PE=1 SV=1	Tim17/Tim22/Tim23/Pmp24 family
BnaA07T0161900WE	0.420395	0.346179	-0.225678	0.0516083	-1.03568	0.0372829	--	cysteine--tRNA ligase, cytoplasmic-like; K01883 cysteinyl-tRNA synthetase [EC:6.1.1.16] (A)	Cysteine--tRNA ligase 2, cytoplasmic OS=Arabidopsis thaliana GN=At5g38830 PE=2 SV=1	tRNA synthetases class I (C) catalytic domain
BnaA07T0168700WE	0.0453174	0.345944	0.166202	0.116079	0.518714	0.0226747	GO:0016747	omega-hydroxypalmitate O-feruloyl transferase-like; K15400 omega-hydroxypalmitate O-feruloyl transferase [EC:2.3.1.188] (A)	Omega-hydroxypalmitate O-feruloyl transferase OS=Arabidopsis thaliana GN=HHT1 PE=1 SV=1	Transferase family
BnaA07T0170200WE	0.0635335	0.359904	-0.753319	0.00367162	-0.732609	0.00130298	--	40S ribosomal protein S10-2-like; K02947 small subunit ribosomal protein S10e (A)	40S ribosomal protein S10-2 OS=Arabidopsis thaliana GN=RPS10B PE=2 SV=1	Plectin/S10 domain
BnaA07T0173500WE	-0.488835	0.0579827	-0.547953	0.0367401	0.569001	0.00517482	GO:0003924	dynamin-related protein 1E; K01528 dynamin GTPase [EC:3.6.5.5] (A)	Dynamin-related protein 1A OS=Arabidopsis thaliana GN=DRP1A PE=1 SV=3	Dynamin GTPase effector domain
BnaA07T0175100WE	-0.132465	0.0160547	-0.702033	0.0315221	-1.07175	0.0107668	GO:0004332	fructose-bisphosphate aldolase, cytoplasmic isozyme; K01623 fructose-bisphosphate aldolase, class I [EC:4.1.2.13] (A)	Fructose-bisphosphate aldolase, cytoplasmic isozyme OS=Cicer arietinum GN=ALDC PE=2 SV=1	Fructose-bisphosphate aldolase class-I
BnaA07T0175300WE	0.127578	0.226959	-0.220636	0.267964	1.05535	0.00978393	GO:0005515	hypothetical protein; K10359 myosin VII (A)	CBS domain-containing protein CBSCBSPB3 OS=Arabidopsis thaliana GN=CBSCBSPB3 PE=1 SV=1	PB1 domain
BnaA07T0185400WE	-1.14267	0.0185567	0.0630415	0.296857	0.952917	0.0467575	GO:0004553	hypothetical protein; K19891 glucan endo-1,3-beta-glucosidase 1/2/3 [EC:3.2.1.39] (A)	Glucan endo-1,3-beta-glucosidase OS=Triticum aestivum GN=GLC1 PE=2 SV=1	X8 domain
BnaA07T0188800WE	-0.999539	0.0345407	0.474379	0.334486	0.562629	0.00782704	GO:0008270	hypothetical protein; K17592 sacsin (A)	Quinone oxidoreductase-like protein 2 homolog OS=Nematostella vectensis GN=v1g238856 PE=3 SV=1	Alcohol dehydrogenase GroES-like domain
BnaA07T0195800WE	-0.454605	0.134185	0.534147	0.259055	1.0265	0.0283335	--	--	--	--
BnaA07T0198400WE	0.124905	0.0843599	0.101263	0.141513	-0.590024	0.00385738	GO:0004455	ketol-acid reductoisomerase, chloroplastic; K00053 ketol-acid reductoisomerase [EC:1.1.1.86] (A)	Ketol-acid reductoisomerase, chloroplastic OS=Arabidopsis thaliana GN=At3g58610 PE=2 SV=2	Acetohydroxy acid isomeroreductase, NADPH-binding domain
BnaA07T0199700WE	0.136769	0.189735	-0.164524	0.145271	-0.507528	0.0026954	GO:0006886	IPO7, IPO8; importin 7; K18755 importin-8 (A)	Importin beta-like SAD2 homolog OS=Arabidopsis thaliana GN=At3g59020 PE=1 SV=1	Cse1
BnaA07T0204200WE	-0.706292	0.0745406	0.685516	0.0768364	0.681606	0.00848889	GO:0006464	palmitoyl-protein thioesterase 1; K01074 palmitoyl-protein thioesterase [EC:3.1.2.22] (A)	Palmitoyl-protein thioesterase 1 OS=Caenorhabditis elegans GN=ppt-1 PE=2 SV=2	Palmitoyl protein thioesterase
BnaA07T0206600WE	-0.0674086	0.214552	0.683387	0.0383899	0.997767	0.00274402	GO:0005515	hypothetical protein; K19938 rabphilin-3A (A)	Synaptotagmin-5 OS=Arabidopsis thaliana GN=SYT5 PE=2 SV=1	C2 domain
BnaA07T0213100WE	-0.677025	0.205606	0.407138	0.00255662	2.40442	0.00284799	GO:0000287	hypothetical protein; K15799 (+)-alpha-barbatene/beta-chamigrene/thujopsene synthase [EC:4.2.3.69 4.2.3.78 4.2.3.79] (A)	Terpenoid synthase 28 OS=Arabidopsis thaliana GN=TPS28 PE=2 SV=1	Terpene synthase, N-terminal domain
BnaA07T0218500WE	-0.0983306	0.359491	0.247364	0.147297	-0.797073	0.00265902	--	pentatricopeptide repeat-containing protein At5g25630-like; K17710 pentatricopeptide repeat domain-containing protein 1 (A)	Pentatricopeptide repeat-containing protein At1g80270, mitochondrial OS=Arabidopsis thaliana GN=At1g80270 PE=2 SV=1	Pentatricopeptide repeat domain
BnaA07T0219600WE	-0.355315	0.0283366	0.260393	0.0052142	0.890828	0.0108472	GO:0005515	protein TOPLESS-like; K14963 COMPASS component SWD3 (A)	Topless-related protein 1 OS=Arabidopsis thaliana GN=TPR1 PE=1 SV=3	WD domain, G-beta repeat
BnaA07T0220500WE	0.599901	0.0112115	-0.140172	0.0673036	-1.04663	0.000931831	--	60S ribosomal protein L7-1; K02937 large subunit ribosomal protein L7e (A)	60S ribosomal protein L7-1 OS=Arabidopsis thaliana GN=RPL7A PE=2 SV=1	Ribosomal L30 N-terminal domain
BnaA07T0222900WE	0.409292	0.190535	-0.349961	0.0820551	-1.27757	0.0367609	GO:0005737	2-dehydro-3-deoxyphosphooctonate aldolase 1; K01627 2-dehydro-3-deoxyphosphooctonate aldolase (KDO 8-P synthase) [EC:2.5.1.55] (A)	2-dehydro-3-deoxyphosphooctonate aldolase 1 OS=Arabidopsis thaliana GN=KDSA1 PE=1 SV=2	DAHP synthetase I family
BnaA07T0226000WE	-0.72855	0.25706	-1.77059	0.0114688	-0.964715	0.0258606	GO:0016881	ubiquitin-conjugating enzyme E2 35-like; K10580 ubiquitin-conjugating enzyme E2 N [EC:2.3.2.23] (A)	Ubiquitin-conjugating enzyme E2 35 OS=Arabidopsis thaliana GN=UBC35 PE=1 SV=1	Ubiquitin-conjugating enzyme
BnaA07T0229800WE	-0.400286	0.0433455	-0.707903	0.217402	-2.64859	0.0249897	GO:0009055	NIA2, NR; nitrate reductase [NADH], clone PBNBR1412; K10534 nitrate reductase (NAD(P)H) [EC:1.7.1.1 1.7.1.2 1.7.1.3] (A)	Nitrate reductase [NADH], clone PBNBR1412 OS=Brassica napus GN=NIA2 PE=2 SV=1	Cytochrome b5-like Heme/Steroid binding domain
BnaA07T0231200WE	-0.382317	0.0881616	-0.0435667	0.318703	0.756253	0.0213031	GO:0003824	acs6; long chain acyl-CoA synthetase 9, chloroplastic (EC:6.2.1.3); K01897 long-chain acyl-CoA synthetase [EC:6.2.1.3] (A)	Long chain acyl-CoA synthetase 9, chloroplastic OS=Arabidopsis thaliana GN=LACS9 PE=2 SV=1	AMP-binding enzyme
BnaA07T0232300WE	0.537995	0.210703	-0.599345	0.0958911	-1.44249	0.0147081	GO:0016491	1-aminocyclopropane-1-carboxylate oxidase 5-like; K05933 aminocyclopropanecarboxylate oxidase [EC:1.14.17.4] (A)	1-aminocyclopropane-1-carboxylate oxidase 5 OS=Arabidopsis thaliana GN=At1g77330 PE=2 SV=1	2OG-Fe(II) oxygenase superfamily
BnaA07T0239200WE	-1.11583	0.0271765	-0.0909337	0.0933993	1.24122	0.00160905	GO:0006950	--	Dehydrin ERD14 OS=Arabidopsis thaliana GN=ERD14 PE=1 SV=1	Dehydrin
BnaA07T0240000WE	0.369901	0.0350524	0.159093	0.330379	-1.37448	0.00151747	GO:0004470	NADP-dependent malic enzyme 4, chloroplastic-like; K00029 malate dehydrogenase (oxaloacetate-decarboxylating)(NADP+) [EC:1.1.1.40] (A)	NADP-dependent malic enzyme 4, chloroplastic OS=Arabidopsis thaliana GN=NADP-ME4 PE=1 SV=1	Malic enzyme, N-terminal domain
BnaA07T0247800WE	0.0346868	0.374766	0.365837	0.154983	1.06518	0.0352637	GO:0006629	geranylgeranyl diphosphate reductase, chloroplastic; K10960 geranylgeranyl reductase [EC:1.3.1.83] (A)	GDSL esterase/lipase At1g74460 OS=Arabidopsis thaliana GN=At1g74460 PE=2 SV=1	GDSL-like Lipase/Acylhydrolase
BnaA07T0251000WE	1.09072	0.00706221	-0.699118	0.0135663	-1.35514	0.0076233	GO:0000234	phosphoethanolamine N-methyltransferase 3; K05929 phosphoethanolamine N-methyltransferase [EC:2.1.1.103] (A)	Phosphoethanolamine N-methyltransferase 3 OS=Arabidopsis thaliana GN=NMT3 PE=2 SV=2	Methyltransferase domain
BnaA07T0251600WE	0.100487	0.364983	0.616765	0.007731	1.15223	0.0136964	GO:0005985	sucrose synthase 6-like; K00695 sucrose synthase [EC:2.4.1.13] (A)	Sucrose synthase 6 OS=Arabidopsis thaliana GN=SUS6 PE=1 SV=1	Glycosyl transferases group 1
BnaA07T0252100WE	-0.244066	0.05612	-0.117764	0.17543	-0.644141	0.0017066	--	transcription factor BTF3 homolog 4-like; K01527 nascent polypeptide-associated complex subunit beta (A)	Transcription factor BTF3 OS=Homo sapiens GN=BTF3 PE=1 SV=1	NAC domain
BnaA07T0256000WE	-0.480424	0.101393	0.855207	0.0884841	1.06732	0.0227452	GO:0006810	patellin-5-like; K19996 phosphatidylinositol transfer protein SFH5 (A)	Patellin-3 OS=Arabidopsis thaliana GN=PATL3 PE=1 SV=2	CRAL/TRIO, N-terminal domain
BnaA07T0261900WE	-0.135552	0.171888	0.00548032	0.250586	0.928822	0.00657678	--	probable peroxygenase 4; K17991 peroxygenase [EC:1.11.2.3] (A)	Probable peroxygenase 4 OS=Arabidopsis thaliana GN=PXG4 PE=1 SV=1	Caleosin related protein
BnaA07T0275200WE	-0.107226	0.281865	0.581525	0.0338048	2.38795	0.0334478	--	CTD small phosphatase-like protein 2; K17616 CTD small phosphatase-like protein 2 [EC:3.1.3.-] (A)	REF/SRPP-like protein At1g67360 OS=Arabidopsis thaliana GN=At1g67360 PE=2 SV=1	Rubber elongation factor protein (REF)
BnaA07T0277400WE	-0.434881	0.282028	0.131055	0.224462	0.815787	0.00936376	GO:0003723	transcription elongation factor SPT6-like; K11292 transcription elongation factor SPT6 (A)	Transcription elongation factor SPT6 OS=Homo sapiens GN=SUPT6H PE=1 SV=2	Acidic N-terminal SPT6
BnaA07T0277800WE	0.252163	0.172529	0.0345118	0.109041	0.563319	0.003306	GO:0005509	LETM1 and EF-hand domain-containing protein 1, mitochondrial; K17800 LETM1 and EF-hand domain-containing protein 1, mitochondrial (A)	LETM1 and EF-hand domain-containing protein 1, mitochondrial OS=Gallus gallus GN=LETM1 PE=2 SV=1	LETM1-like protein
BnaA07T0278300WE	0.556341	0.269206	-1.30388	0.00503813	0.603568	0.018855	--	U6 snRNA-associated Sm-like protein LSm8; K12627 U6 snRNA-associated Sm-like protein LSm8 (A)	Sm-like protein LSM8 OS=Arabidopsis thaliana GN=LSM8 PE=1 SV=1	LSM domain
BnaA07T0279300WE	0.31183	0.0460381	0.190386	0.0198331	0.570914	0.018713	GO:0004351	GAD; glutamate decarboxylase 2 (EC:4.1.1.15); K01580 glutamate decarboxylase [EC:4.1.1.15] (A)	Glutamate decarboxylase 2 OS=Arabidopsis thaliana GN=GAD2 PE=1 SV=1	Pyridoxal-dependent decarboxylase conserved domain
BnaA07T0279600WE	0.214135	0.22336	-0.265834	0.0284152	-0.903411	0.000668116	--	60S ribosomal export protein NMD3-like; K07562 nonsense-mediated mRNA decay protein 3 (A)	60S ribosomal export protein NMD3 OS=Dictyostelium discoideum GN=nmd3 PE=3 SV=1	NMD3 family
BnaA07T0285100WE	-0.379378	0.0295726	0.13365	0.274255	0.512097	0.0326195	--	--	HEAT repeat-containing protein 5B OS=Mus musculus GN=Heatr5b PE=2 SV=3	--
BnaA07T0289600WE	0.772415	0.338581	0.0487919	0.381432	1.21337	0.000729665	--	probable pectate lyase 5; K01728 pectate lyase [EC:4.2.2.2] (A)	Probable pectate lyase 5 OS=Arabidopsis thaliana GN=At1g67750 PE=2 SV=2	Pectate lyase
BnaA07T0291900WE	0.328479	0.117518	-0.0304486	0.373605	0.537992	0.0124503	GO:0008168	POPTRDRAFT_573689; hypothetical protein; K18848 indole-3-acetate O-methyltransferase [EC:2.1.1.278] (A)	Probable S-adenosylmethionine-dependent methyltransferase At5g38100 OS=Arabidopsis thaliana GN=At5g38100 PE=2 SV=1	SAM dependent carboxyl methyltransferase
BnaA07T0301900WE	0.0180886	0.336343	0.305763	0.00598644	0.724971	0.00979891	--	gacY; RhoGAP domain-containing protein; K18470 Rho GTPase-activating protein 1 (A)	Protein GDAP2 homolog OS=Nematostella vectensis GN=gdap2 PE=3 SV=1	Macro domain
BnaA07T0303600WE	0.223598	0.37635	-0.709401	0.0161878	-1.24105	0.00527482	GO:0008152	hypothetical protein; K17803 methyltransferase OMS1, mitochondrial [EC:2.1.1.-] (A)	Methyltransferase-like protein 7A OS=Homo sapiens GN=METTL7A PE=1 SV=1	Methyltransferase domain
BnaA07T0309900WE	0.338281	0.0651436	-0.469246	0.00422625	-1.43993	0.00318553	GO:0008152	pyruvate dehydrogenase E1 component subunit alpha-2, mitochondrial-like; K00161 pyruvate dehydrogenase E1 component alpha subunit [EC:1.2.4.1] (A)	Pyruvate dehydrogenase E1 component subunit alpha-2, mitochondrial OS=Arabidopsis thaliana GN=IAR4 PE=1 SV=2	Dehydrogenase E1 component
BnaA07T0314400WE	0.126932	0.179962	-0.196683	0.208826	1.12251	0.00985789	--	probable peroxygenase 4; K17991 peroxygenase [EC:1.11.2.3] (A)	Probable peroxygenase 4 OS=Arabidopsis thaliana GN=PXG4 PE=1 SV=1	Caleosin related protein
BnaA07T0315500WE	-0.0972412	0.25216	-1.2412	0.0323918	-1.64058	0.00230295	GO:0005515	calcium-transporting ATPase 2, plasma membrane-type-like; K01537 Ca2+-transporting ATPase [EC:3.6.3.8] (A)	Protein C2-DOMAIN ABA-RELATED 7 OS=Arabidopsis thaliana GN=CAR7 PE=2 SV=1	C2 domain
BnaA07T0317700WE	0.0656742	0.29814	0.511907	0.0173082	1.70023	0.0119183	GO:0005507	laccase-15-like; K05909 laccase [EC:1.10.3.2] (A)	Multicopper oxidase LPR2 OS=Arabidopsis thaliana GN=LPR2 PE=2 SV=1	Multicopper oxidase
BnaA07T0319000WE	1.67524	0.176753	0.390321	0.0135646	0.700068	0.0121437	--	hypothetical protein; K14573 nucleolar protein 4 (A)	Single-stranded DNA-binding protein WHY2, mitochondrial OS=Arabidopsis thaliana GN=WHY2 PE=1 SV=1	Whirly transcription factor
BnaA07T0325200WE	-0.046497	0.325555	0.0124055	0.285589	0.76962	0.0182931	GO:0006810	patellin-3-like; K19996 phosphatidylinositol transfer protein SFH5 (A)	Patellin-1 OS=Arabidopsis thaliana GN=PATL1 PE=1 SV=2	CRAL/TRIO, N-terminal domain
BnaA07T0325400WE	-0.0368113	0.247884	0.136337	0.173578	0.970557	0.0238033	GO:0005515	E3 ubiquitin-protein ligase RNF170; K15707 RING finger protein 170 [EC:2.3.2.27] (A)	E3 ubiquitin-protein ligase RNF170 OS=Danio rerio GN=rnf170 PE=2 SV=1	Protein of unknown function (DUF1232)
BnaA07T0327700WE	-0.135237	0.334654	0.329986	0.0994989	0.715329	0.018713	GO:0016021	--	Transmembrane protein 87B OS=Mus musculus GN=Tmem87b PE=2 SV=1	Lung seven transmembrane receptor
BnaA07T0332400WE	-0.0536804	0.353691	-0.310527	0.0529315	-0.734764	0.00599058	--	transcription factor BTF3 homolog 4-like; K01527 nascent polypeptide-associated complex subunit beta (A)	Transcription factor BTF3 OS=Mus musculus GN=Btf3 PE=1 SV=3	NAC domain
BnaA07T0332700WE	-0.16355	0.241638	-0.076781	0.300211	-0.666504	0.00322403	GO:0004866	--	Miraculin OS=Synsepalum dulcificum PE=1 SV=3	Trypsin and protease inhibitor
BnaA07T0332800WE	0.309403	0.0827994	-0.869738	0.0391152	-1.0753	0.0135402	GO:0004866	--	Alpha-amylase/subtilisin inhibitor OS=Oryza sativa subsp. japonica GN=RASI PE=1 SV=2	Trypsin and protease inhibitor
BnaA07T0333600WE	-0.543577	0.092002	0.616291	0.0016867	1.35276	0.00953973	GO:0005985	sucrose synthase 6; K00695 sucrose synthase [EC:2.4.1.13] (A)	Sucrose synthase 6 OS=Arabidopsis thaliana GN=SUS6 PE=1 SV=1	Glycosyl transferases group 1
BnaA07T0334800WE	-1.24986	0.00402086	0.0170734	0.230143	1.42257	0.00868746	GO:0016021	auxin efflux carrier component 1-like; K13947 auxin efflux carrier family (A)	Auxin efflux carrier component 1 OS=Arabidopsis thaliana GN=PIN1 PE=1 SV=1	Membrane transport protein
BnaA07T0335300WE	0.226293	0.0143382	-1.06476	0.00665619	-1.6133	0.0020751	GO:0005509	probable calcium-binding protein CML26; K13448 calcium-binding protein CML (A)	Probable calcium-binding protein CML26 OS=Arabidopsis thaliana GN=CML26 PE=1 SV=1	EF-hand domain pair
BnaA07T0339600WE	0.422342	0.0261199	-0.761498	0.00932054	-0.754534	0.0145873	GO:0008146	cytosolic sulfotransferase 16-like; K11821 desulfoglucosinolate sulfotransferase A/B/C [EC:2.8.2.-] (A)	Cytosolic sulfotransferase 16 OS=Arabidopsis thaliana GN=SOT16 PE=1 SV=1	Sulfotransferase domain
BnaA07T0349400WE	0.17875	0.0167342	0.377013	0.0829784	1.05638	0.00962927	GO:0016020	probable fructose-bisphosphate aldolase 3, chloroplastic; K01623 fructose-bisphosphate aldolase, class I [EC:4.1.2.13] (A)	Protein WALLS ARE THIN 1 OS=Arabidopsis thaliana GN=WAT1 PE=1 SV=1	EamA-like transporter family
BnaA07T0350300WE	0.324127	0.0755613	0.175237	0.244028	0.608236	0.0101871	GO:0003676	5'-3' exoribonuclease 3; K12619 5'-3' exoribonuclease 2 [EC:3.1.13.-] (A)	5'-3' exoribonuclease 3 OS=Arabidopsis thaliana GN=XRN3 PE=2 SV=1	Zinc knuckle
BnaA07T0351900WE	-0.219034	0.271292	0.348414	0.0598146	0.85114	0.0105731	--	vacuolar protein sorting-associated protein 35B; K18468 vacuolar protein sorting-associated protein 35 (A)	Vacuolar protein sorting-associated protein 35B OS=Arabidopsis thaliana GN=VPS35B PE=1 SV=1	Vacuolar protein sorting-associated protein 35
BnaA07T0354800WE	-0.112557	0.232461	-0.263293	0.0501764	1.3258	0.00986072	GO:0006950	--	Dehydrin ERD14 OS=Arabidopsis thaliana GN=ERD14 PE=1 SV=1	Dehydrin
BnaA07T0358600WE	-0.224842	0.0115669	-0.452465	0.2287	-1.68745	0.0328997	GO:0003872	pyrophosphate--fructose 6-phosphate 1-phosphotransferase subunit alpha 2; K00895 pyrophosphate--fructose-6-phosphate 1-phosphotransferase [EC:2.7.1.90] (A)	Pyrophosphate--fructose 6-phosphate 1-phosphotransferase subunit alpha 2 OS=Arabidopsis thaliana GN=PFP-ALPHA2 PE=2 SV=1	Phosphofructokinase
BnaA07T0360200WE	0.120972	0.207094	-0.84061	0.00618579	0.991287	0.0460045	GO:0006662	TRXm; thioredoxin m; K03671 thioredoxin 1 (A)	Thioredoxin Y1, chloroplastic OS=Arabidopsis thaliana GN=At1g76760 PE=2 SV=1	Thioredoxin
BnaA07T0362700WE	-0.453911	0.0271531	-0.310171	0.276674	-1.94288	0.0390439	GO:0008270	adh1; alcohol dehydrogenase class-P; K18857 alcohol dehydrogenase class-P [EC:1.1.1.1] (A)	Alcohol dehydrogenase class-P OS=Arabidopsis thaliana GN=ADH1 PE=1 SV=2	Zinc-binding dehydrogenase
BnaA07T0365600WE	-0.204535	0.0324987	-0.821832	0.0687686	-1.61948	0.0132441	GO:0006662	protein disulfide isomerase-like 1-2; K09580 protein disulfide-isomerase A1 [EC:5.3.4.1] (A)	Protein disulfide isomerase-like 1-2 OS=Arabidopsis thaliana GN=PDIL1-2 PE=2 SV=1	Thioredoxin-like domain
BnaA07T0366300WE	-0.00165359	0.345166	-0.826132	0.0898153	-2.30695	0.0213463	GO:0009055	nitrate reductase [NADH], clone PBNBR1405; K10534 nitrate reductase (NAD(P)H) [EC:1.7.1.1 1.7.1.2 1.7.1.3] (A)	Nitrate reductase [NADH], clone PBNBR1405 OS=Brassica napus GN=NIA1 PE=2 SV=1	Cytochrome b5-like Heme/Steroid binding domain
BnaA07T0366700WE	-0.0981917	0.247517	0.186047	0.272342	-0.514168	0.0178658	GO:0003743	probable eukaryotic translation initiation factor 5-2; K03262 translation initiation factor 5 (A)	Probable eukaryotic translation initiation factor 5-2 OS=Arabidopsis thaliana GN=At1g77840 PE=2 SV=1	eIF4-gamma/eIF5/eIF2-epsilon
BnaA07T0368300WE	-0.227765	0.0126761	-0.255288	0.00925807	-0.514068	0.0131535	GO:0004619	phosphoglycerate mutase; K01834 2,3-bisphosphoglycerate-dependent phosphoglycerate mutase [EC:5.4.2.11] (A)	2,3-bisphosphoglycerate-dependent phosphoglycerate mutase OS=Protochlamydia amoebophila (strain UWE25) GN=gpmA PE=3 SV=1	Histidine phosphatase superfamily (branch 1)
BnaA07T0368400WE	-1.25396	0.0402498	0.25384	0.0877716	1.20613	0.0333149	GO:0004553	beta-D-xylosidase 4; K15920 beta-D-xylosidase 4 [EC:3.2.1.37] (A)	Probable beta-D-xylosidase 7 OS=Arabidopsis thaliana GN=BXL7 PE=2 SV=2	Fibronectin type III-like domain
BnaA07T0374600WE	-0.966888	0.00264609	0.170867	0.285318	0.614415	0.0159228	GO:0005622	rmp; RNA polymerase II subunit 5-mediating protein; K17560 unconventional prefoldin RPB5 interactor 1 (A)	Transport protein particle 20 kDa subunit OS=Schizosaccharomyces pombe (strain 972 / ATCC 24843) GN=trs20 PE=3 SV=1	Sedlin, N-terminal conserved region
BnaA08T0001000WE	-0.81514	0.133053	0.289458	0.0224826	-0.525904	0.000260252	--	nucleolar protein 56-like; K14564 nucleolar protein 56 (A)	Nucleolar protein 56 OS=Schizosaccharomyces pombe (strain 972 / ATCC 24843) GN=nop56 PE=3 SV=1	NOP5NT (NUC127) domain
BnaA08T0002200WE	-0.072286	0.34324	-0.469879	0.268926	-1.12001	0.0183527	GO:0005515	mitochondrial import inner membrane translocase subunit TIM50-like; K17496 mitochondrial import inner membrane translocase subunit TIM50 (A)	Mitochondrial import inner membrane translocase subunit TIM50 OS=Arabidopsis thaliana GN=TIM50 PE=1 SV=1	NLI interacting factor-like phosphatase
BnaA08T0007400WE	-0.0645863	0.19728	0.795571	0.0116687	1.58809	0.0181248	--	hypothetical protein; K01870 isoleucyl-tRNA synthetase [EC:6.1.1.5] (A)	Dirigent protein 20 OS=Arabidopsis thaliana GN=DIR20 PE=2 SV=1	Dirigent-like protein
BnaA08T0008100WE	-0.483996	0.277673	-0.417886	0.24848	0.867789	0.0148909	--	MIRO-like protein; K07870 Ras homolog gene family, member T1 (A)	--	--
BnaA08T0008200WE	0.129986	0.186216	0.88191	0.00304199	0.695135	0.0052523	GO:0003676	DEAD-box ATP-dependent RNA helicase 20; K12823 ATP-dependent RNA helicase DDX5/DBP2 [EC:3.6.4.13] (A)	DEAD-box ATP-dependent RNA helicase 20 OS=Arabidopsis thaliana GN=RH20 PE=2 SV=1	Helicase conserved C-terminal domain
BnaA08T0010900WE	0.194741	0.0461817	-0.14078	0.119452	-0.599404	0.0125447	GO:0003676	oligouridylate-binding protein 1A-like; K13201 nucleolysin TIA-1/TIAR (A)	Oligouridylate-binding protein 1A OS=Arabidopsis thaliana GN=UBP1A PE=1 SV=1	RNA recognition motif. (a.k.a. RRM, RBD, or RNP domain)
BnaA08T0013400WE	0.127798	0.269023	-0.11211	0.151051	0.964144	0.0490729	GO:0016787	persulfide dioxygenase ETHE1 homolog, mitochondrial-like; K17725 sulfur dioxygenase [EC:1.13.11.18] (A)	Persulfide dioxygenase ETHE1 homolog, mitochondrial OS=Arabidopsis thaliana GN=GLY3 PE=1 SV=3	Metallo-beta-lactamase superfamily
BnaA08T0015800WE	0.0814769	0.308441	0.425202	0.0124823	0.644698	0.00713433	GO:0005737	3-deoxy-manno-octulosonate cytidylyltransferase, mitochondrial; K00979 3-deoxy-manno-octulosonate cytidylyltransferase (CMP-KDO synthetase) [EC:2.7.7.38] (A)	3-deoxy-manno-octulosonate cytidylyltransferase, mitochondrial OS=Arabidopsis thaliana GN=KDSB PE=1 SV=1	Cytidylyltransferase
BnaA08T0019900WE	0.459212	0.0280261	-0.765869	0.0270657	-0.615593	0.0138745	GO:0005515	eukaryotic translation initiation factor 2alpha kinase 1, putative; K16196 eukaryotic translation initiation factor 2-alpha kinase 4 [EC:2.7.11.1] (A)	RWD domain-containing protein 1 OS=Rattus norvegicus GN=Rwdd1 PE=2 SV=1	RWD domain
BnaA08T0020700WE	-0.216764	0.0357943	0.500748	0.0904579	0.758071	0.00470785	--	uncharacterized LOC103446271; K13506 glycerol-3-phosphate O-acyltransferase 3/4 [EC:2.3.1.15] (A)	Uncharacterized protein At1g04910 OS=Arabidopsis thaliana GN=At1g04910 PE=2 SV=1	GDP-fucose protein O-fucosyltransferase
BnaA08T0024400WE	0.0354561	0.262785	0.126891	0.12721	0.649611	0.0136323	--	electron transfer flavoprotein subunit alpha, mitochondrial-like; K03522 electron transfer flavoprotein alpha subunit (A)	Electron transfer flavoprotein subunit alpha, mitochondrial OS=Arabidopsis thaliana GN=ETFA PE=1 SV=1	Electron transfer flavoprotein domain
BnaA08T0027800WE	-0.193741	0.20863	-0.239885	0.142897	0.70885	0.00699245	GO:0004252	ATP-dependent Clp protease proteolytic subunit-related protein 1, chloroplastic; K01358 ATP-dependent Clp protease, protease subunit [EC:3.4.21.92] (A)	ATP-dependent Clp protease proteolytic subunit-related protein 1, chloroplastic OS=Arabidopsis thaliana GN=CLPR1 PE=1 SV=1	Clp protease
BnaA08T0033700WE	-0.68486	0.119664	-0.659842	0.336708	1.6206	0.03437	GO:0005634	--	Nuclear-interacting partner of ALK OS=Pongo abelii GN=ZC3HC1 PE=2 SV=1	C3HC zinc finger-like
BnaA08T0034200WE	0.0425671	0.318128	0.316287	0.036608	-0.511953	0.00410454	GO:0000166	signal recognition particle 54 kDa protein 3-like; K03106 signal recognition particle subunit SRP54 [EC:3.6.5.4] (A)	Signal recognition particle 54 kDa protein 3 OS=Arabidopsis thaliana GN=SRP-54C PE=2 SV=2	SRP54-type protein, helical bundle domain
BnaA08T0035600WE	1.04717	0.0459318	0.863696	0.0233855	1.72305	0.0377478	GO:0000785	T1N15.24; K01598 phosphopantothenoylcysteine decarboxylase [EC:4.1.1.36] (A)	Putative DNA-binding protein At1g48610 OS=Arabidopsis thaliana GN=At1g48610 PE=1 SV=1	AT hook motif
BnaA08T0045300WE	-0.0990908	0.161086	0.15965	0.199326	1.60055	0.0121768	GO:0006508	hypothetical protein; K16292 KDEL-tailed cysteine endopeptidase [EC:3.4.22.-] (A)	Cysteine proteinase RD21a OS=Arabidopsis thaliana GN=RD21A PE=1 SV=1	Granulin
BnaA08T0047200WE	0.271838	0.0660386	-1.28846	0.0180583	-1.32598	0.00107387	GO:0006662	thioredoxin H5; K03671 thioredoxin 1 (A)	Thioredoxin H5 OS=Arabidopsis thaliana GN=TRX5 PE=1 SV=1	Thioredoxin
BnaA08T0048500WE	0.0299181	0.162895	0.301176	0.362472	1.72969	0.00570722	GO:0004030	aldehyde dehydrogenase family 3 member H1-like; K00128 aldehyde dehydrogenase (NAD+) [EC:1.2.1.3] (A)	Aldehyde dehydrogenase family 3 member H1 OS=Arabidopsis thaliana GN=ALDH3H1 PE=1 SV=2	Aldehyde dehydrogenase family
BnaA08T0050200WE	-0.101381	0.129679	-0.756025	0.0140319	-0.733794	0.000890787	GO:0003676	RPS19; 40S ribosomal protein S19; K02965 small subunit ribosomal protein S19 (A)	Glycine-rich RNA-binding protein 2, mitochondrial OS=Arabidopsis thaliana GN=RBG2 PE=1 SV=1	RNA recognition motif. (a.k.a. RRM, RBD, or RNP domain)
BnaA08T0050300WE	-0.409898	0.156476	-1.08348	0.0178726	-1.00864	0.0192157	GO:0003676	RPS19; 40S ribosomal protein S19; K02965 small subunit ribosomal protein S19 (A)	Glycine-rich RNA-binding protein 2, mitochondrial OS=Arabidopsis thaliana GN=RBG2 PE=1 SV=1	RNA recognition motif. (a.k.a. RRM, RBD, or RNP domain)
BnaA08T0054700WE	-0.0946524	0.26226	0.195645	0.209704	0.527291	0.0296268	GO:0008270	2-methylene-furan-3-one reductase-like; K18980 2-methylene-furan-3-one reductase [EC:1.3.1.105] (A)	Putative quinone-oxidoreductase homolog, chloroplastic OS=Arabidopsis thaliana GN=At4g13010 PE=2 SV=1	Alcohol dehydrogenase GroES-like domain
BnaA08T0054800WE	-0.0168157	0.0907282	1.3998	0.0024372	2.23025	0.000704068	GO:0016021	uncharacterized LOC104585983; K03189 urease accessory protein (A)	Cytochrome b561 and DOMON domain-containing protein At4g12980 OS=Arabidopsis thaliana GN=At4g12980 PE=2 SV=1	Eukaryotic cytochrome b561
BnaA08T0070700WE	-0.083969	0.348067	-0.346903	0.0261093	-0.62781	0.00556739	GO:0003723	eukaryotic translation initiation factor isoform 4E-like; K03259 translation initiation factor 4E (A)	Eukaryotic translation initiation factor isoform 4E OS=Arabidopsis thaliana GN=EIF(ISO)4E PE=1 SV=2	Eukaryotic initiation factor 4E
BnaA08T0074600WE	0.199268	0.0298571	-0.0489677	0.225979	-0.620406	0.00258891	GO:0008430	selenium-binding protein 1; K17285 selenium-binding protein 1 (A)	Selenium-binding protein 1 OS=Arabidopsis thaliana GN=SBP1 PE=1 SV=1	56kDa selenium binding protein (SBP56)
BnaA08T0076700WE	-0.122184	0.279305	0.057914	0.331257	0.750014	0.0138063	GO:0005507	primary amine oxidase-like; K00276 primary-amine oxidase [EC:1.4.3.21] (A)	Primary amine oxidase OS=Pisum sativum PE=1 SV=1	Copper amine oxidase, N3 domain
BnaA08T0082600WE	0.339576	0.123358	0.536897	0.103145	0.906262	0.0343982	GO:0008171	putative caffeoyl-CoA O-methyltransferase At1g67980; K00588 caffeoyl-CoA O-methyltransferase [EC:2.1.1.104] (A)	Putative caffeoyl-CoA O-methyltransferase At1g67980 OS=Arabidopsis thaliana GN=At1g67980 PE=2 SV=1	O-methyltransferase
BnaA08T0084700WE	0.0473854	0.378285	-0.22406	0.0420581	-0.540807	0.00853244	--	OASA4; cysteine synthase; K01738 cysteine synthase A [EC:2.5.1.47] (A)	Cysteine synthase OS=Brassica juncea PE=2 SV=1	Pyridoxal-phosphate dependent enzyme
BnaA08T0088100WE	-1.57649	0.0671884	0.128101	0.279489	-0.635025	0.0332436	GO:0003723	60S ribosome subunit biogenesis protein NIP7 homolog; K07565 60S ribosome subunit biogenesis protein NIP7 (A)	60S ribosome subunit biogenesis protein NIP7 homolog OS=Xenopus tropicalis GN=nip7 PE=2 SV=1	Uncharacterised protein family (UPF0113)
BnaA08T0095900WE	0.189374	0.216581	0.154663	0.0480677	0.551117	0.0131655	GO:0005515	uncharacterized LOC103833994; K19525 vacuolar protein sorting-associated protein 13A/C (A)	Putative vacuolar protein sorting-associated protein 13A OS=Dictyostelium discoideum GN=vps13A PE=2 SV=1	PH domain
BnaA08T0096800WE	-0.033137	0.0846053	0.224944	0.0909911	0.907163	0.00255922	--	replication protein A 70 kDa DNA-binding subunit C-like; K07466 replication factor A1 (A)	--	Agenet domain
BnaA08T0097700WE	0.903746	0.0169255	-1.46146	0.0979384	-2.2205	0.00227451	GO:0003735	60S ribosomal protein L15-1-like; K02877 large subunit ribosomal protein L15e (A)	60S ribosomal protein L15-1 OS=Arabidopsis thaliana GN=RPL15A PE=2 SV=1	Ribosomal L15
BnaA08T0098300WE	0.275412	0.0989405	-0.83766	0.00850191	-0.686806	0.00639795	--	probable H/ACA ribonucleoprotein complex subunit 1; K13199 plasminogen activator inhibitor 1 RNA-binding protein (A)	--	Stm1
BnaA08T0098400WE	-0.020632	0.381474	0.319354	0.115329	0.557133	0.00671896	GO:0003924	ras-related protein RABD2c; K07874 Ras-related protein Rab-1A (A)	Ras-related protein RABD2c OS=Arabidopsis thaliana GN=RABD2C PE=2 SV=1	Ras family
BnaA08T0100100WE	-0.180252	0.0468445	-0.229913	0.172937	-0.656414	0.0107519	GO:0003723	eukaryotic translation initiation factor 4E-1; K03259 translation initiation factor 4E (A)	Eukaryotic translation initiation factor 4E-1 OS=Arabidopsis thaliana GN=EIF4E1 PE=1 SV=1	Eukaryotic initiation factor 4E
BnaA08T0101200WE	0.130184	0.118336	0.24407	0.104859	2.31178	0.0105426	--	ubiquitin carboxyl-terminal hydrolase 9-like; K11855 ubiquitin carboxyl-terminal hydrolase 36/42 [EC:3.4.19.12] (A)	CASP-like protein 1B2 OS=Arabidopsis lyrata subsp. lyrata GN=ARALYDRAFT_492822 PE=3 SV=1	Domain of unknown function (DUF588)
BnaA08T0102300WE	0.351497	0.166294	-0.0508809	0.176491	0.50762	0.0194248	--	gak; cyclin G associated kinase; K08855 cyclin G-associated kinase [EC:2.7.11.1] (A)	Auxilin-related protein 2 OS=Arabidopsis thaliana GN=At4g12770 PE=1 SV=1	DnaJ domain
BnaA08T0106900WE	-0.280566	0.347025	-0.00134249	0.304614	1.23851	0.00711862	GO:0033743	peptide methionine sulfoxide reductase B9-like; K07305 peptide-methionine (R)-S-oxide reductase [EC:1.8.4.12] (A)	Peptide methionine sulfoxide reductase B9 OS=Arabidopsis thaliana GN=MSRB9 PE=2 SV=1	SelR domain
BnaA08T0108700WE	-0.212726	0.305822	0.292823	0.1185	-1.32247	0.0220711	GO:0016020	--	ER membrane protein complex subunit 3 OS=Danio rerio GN=emc3 PE=2 SV=1	Integral membrane protein DUF106
BnaA08T0112700WE	0.0283126	0.0997101	0.421473	0.0141529	1.10664	0.021604	GO:0009058	cystine lyase CORI3-like; K00815 tyrosine aminotransferase [EC:2.6.1.5] (A)	Probable aminotransferase TAT4 OS=Arabidopsis thaliana GN=At4g23590 PE=2 SV=1	Aminotransferase class I and II
BnaA08T0113700WE	0.522313	0.0461279	0.584635	0.0202654	0.5656	0.0447462	GO:0008168	trans-resveratrol di-O-methyltransferase; K13262 isoflavone-7-O-methyltransferase [EC:2.1.1.150] (A)	(R,S)-reticuline 7-O-methyltransferase OS=Papaver somniferum GN=PSOMT1 PE=1 SV=1	Dimerisation domain
BnaA08T0113900WE	0.147895	0.0194537	0.259481	0.00160594	0.914047	0.00686487	GO:0005215	aquaporin PIP2-7-like; K09872 aquaporin PIP (A)	Aquaporin PIP2-7 OS=Arabidopsis thaliana GN=PIP2-7 PE=1 SV=2	Major intrinsic protein
BnaA08T0114400WE	-0.502284	0.0413314	0.867005	0.00925314	1.30208	0.00551191	GO:0030001	heavy metal-associated isoprenylated plant protein 26-like; K10752 histone-binding protein RBBP4 (A)	Heavy metal-associated isoprenylated plant protein 26 OS=Arabidopsis thaliana GN=HIPP26 PE=1 SV=1	Heavy-metal-associated domain
BnaA08T0119400WE	0.0883806	0.00830881	-0.110514	0.246033	-0.579152	0.0399848	GO:0004617	D-3-phosphoglycerate dehydrogenase 1, chloroplastic-like; K00058 D-3-phosphoglycerate dehydrogenase [EC:1.1.1.95] (A)	D-3-phosphoglycerate dehydrogenase 1, chloroplastic OS=Arabidopsis thaliana GN=PGDH1 PE=1 SV=1	ACT domain
BnaA08T0120800WE	0.149984	0.138362	-0.638552	0.00839019	0.598703	0.0266585	GO:0008171	caffeoyl-CoA O-methyltransferase 1-like; K00588 caffeoyl-CoA O-methyltransferase [EC:2.1.1.104] (A)	Caffeoyl-CoA O-methyltransferase 1 OS=Arabidopsis thaliana GN=CCOAOMT1 PE=1 SV=1	O-methyltransferase
BnaA08T0120900WE	1.27348	0.0287875	0.483403	0.161788	-1.18087	0.0178426	GO:0016874	methylcrotonoyl-CoA carboxylase beta chain, mitochondrial-like; K01969 3-methylcrotonyl-CoA carboxylase beta subunit [EC:6.4.1.4] (A)	Methylcrotonoyl-CoA carboxylase beta chain, mitochondrial OS=Arabidopsis thaliana GN=MCCB PE=2 SV=1	Carboxyl transferase domain
BnaA08T0125100WE	0.914744	0.179677	-1.77091	0.0248164	-1.38857	0.00328838	GO:0003743	eukaryotic translation initiation factor 3 subunit K-like; K15028 translation initiation factor 3 subunit K (A)	Eukaryotic translation initiation factor 3 subunit K OS=Arabidopsis thaliana GN=TIF3K1 PE=2 SV=1	SAC3/GANP family
BnaA08T0130400WE	0.0559846	0.275427	0.221607	0.0911856	0.659211	0.0123473	GO:0016021	vesicle-associated membrane protein 711; K08515 vesicle-associated membrane protein 7 (A)	Vesicle-associated membrane protein 711 OS=Arabidopsis thaliana GN=VAMP711 PE=1 SV=2	Regulated-SNARE-like domain
BnaA08T0131300WE	-0.38534	0.0465982	-0.309622	0.0609344	-0.843788	0.0210009	GO:0003824	3-hydroxyisobutyryl-CoA hydrolase-like protein 2, mitochondrial; K05605 3-hydroxyisobutyryl-CoA hydrolase [EC:3.1.2.4] (A)	3-hydroxyisobutyryl-CoA hydrolase-like protein 2, mitochondrial OS=Arabidopsis thaliana GN=At4g31810 PE=2 SV=1	Enoyl-CoA hydratase/isomerase
BnaA08T0137900WE	0.215587	0.210466	-1.09577	0.0508451	-1.35331	0.0172351	--	GMP synthase (EC:6.3.5.2); K01951 GMP synthase (glutamine-hydrolysing) [EC:6.3.5.2] (A)	Putative glutamine amidotransferase YLR126C OS=Saccharomyces cerevisiae (strain ATCC 204508 / S288c) GN=YLR126C PE=1 SV=1	Glutamine amidotransferase class-I
BnaA08T0141600WE	0.102834	0.195761	0.229154	0.153848	-0.63327	0.0463046	GO:0003824	venom phosphodiesterase 2-like; K01513 ectonucleotide pyrophosphatase/phosphodiesterase family member 1/3 [EC:3.1.4.1 3.6.1.9] (A)	Venom phosphodiesterase 2 OS=Crotalus adamanteus PE=1 SV=1	Type I phosphodiesterase / nucleotide pyrophosphatase
BnaA08T0142000WE	0.268619	0.0762692	0.019921	0.25765	-0.557893	0.00971279	--	hypothetical protein; K11426 SET and MYND domain-containing protein (A)	--	--
BnaA08T0149800WE	1.43369	0.10268	-0.960641	0.180523	-3.62682	0.0285338	--	asns; asparagine synthetase; K01953 asparagine synthase (glutamine-hydrolysing) [EC:6.3.5.4] (A)	Stem-specific protein TSJT1 OS=Nicotiana tabacum GN=TSJT1 PE=2 SV=1	Aluminium induced protein
BnaA08T0151100WE	0.255913	0.00744157	-0.37116	0.0188813	-0.823116	0.00186818	GO:0003676	polyadenylate-binding protein RBP45-like; K03231 elongation factor 1-alpha (A)	Polyadenylate-binding protein RBP45C OS=Arabidopsis thaliana GN=RBP45C PE=2 SV=1	RNA recognition motif. (a.k.a. RRM, RBD, or RNP domain)
BnaA08T0152700WE	-0.267421	0.174743	0.0911562	0.343541	1.14199	0.0187465	--	myb-like protein X; K17046 protein DEK (A)	Protein DEK OS=Homo sapiens GN=DEK PE=1 SV=1	DEK C terminal domain
BnaA08T0162900WE	-0.397539	0.20835	2.83685	0.0224238	1.70073	0.00890383	GO:0006812	--	Cation/H(+) antiporter 17 OS=Arabidopsis thaliana GN=CHX17 PE=1 SV=1	Sodium/hydrogen exchanger family
BnaA08T0163700WE	0.365832	0.0283384	0.0417514	0.344548	-0.547128	0.0457217	GO:0003735	60S ribosomal protein L8-3; K02938 large subunit ribosomal protein L8e (A)	60S ribosomal protein L8-3 OS=Arabidopsis thaliana GN=RPL8C PE=1 SV=2	Ribosomal Proteins L2, RNA binding domain
BnaA08T0165700WE	-0.0273586	0.170548	0.159803	0.308352	-0.601575	0.00191533	--	pentatricopeptide repeat-containing protein At1g52620-like; K17964 leucine-rich PPR motif-containing protein, mitochondrial (A)	Pentatricopeptide repeat-containing protein At4g36680, mitochondrial OS=Arabidopsis thaliana GN=At4g36680 PE=2 SV=1	Pentatricopeptide repeat domain
BnaA08T0168200WE	0.238408	0.0320932	0.168565	0.334247	-1.0284	0.024168	GO:0005506	cytochrome P450 81F1-like; K00517 [EC:1.14.-.-] (A)	Cytochrome P450 81F1 OS=Arabidopsis thaliana GN=CYP81F1 PE=2 SV=2	Cytochrome P450
BnaA08T0170800WE	-0.133433	0.0599657	-0.269261	0.00972951	-0.623444	0.00193807	--	heat shock 70 kDa protein 9, mitochondrial-like; K04043 molecular chaperone DnaK (A)	Heat shock 70 kDa protein 9, mitochondrial OS=Arabidopsis thaliana GN=HSP70-9 PE=2 SV=1	Hsp70 protein
BnaA08T0173300WE	-0.388022	0.0309258	0.422516	0.0701096	0.500254	0.0346592	GO:0004221	ubiquitin carboxyl-terminal hydrolase 3; K11842 ubiquitin carboxyl-terminal hydrolase 12/46 [EC:3.4.19.12] (A)	Ubiquitin carboxyl-terminal hydrolase 3 OS=Arabidopsis thaliana GN=UBP3 PE=1 SV=1	Ubiquitin carboxyl-terminal hydrolase
BnaA08T0173500WE	0.364747	0.195561	0.458498	0.113041	0.54261	0.0121398	GO:0000166	ABC transporter D family member 1; K05677 ATP-binding cassette, subfamily D (ALD), member 3 (A)	ABC transporter D family member 1 OS=Arabidopsis thaliana GN=ABCC1 PE=1 SV=1	ABC transporter
BnaA08T0174500WE	0.491402	0.0454454	-0.35414	0.136415	1.06262	0.00946864	GO:0003676	apoptotic chromatin condensation inducer in the nucleus-like; K12875 apoptotic chromatin condensation inducer in the nucleus (A)	Apoptotic chromatin condensation inducer in the nucleus OS=Homo sapiens GN=ACIN1 PE=1 SV=2	SAP domain
BnaA08T0174800WE	-0.0212241	0.20854	0.580389	0.0320223	1.45323	0.025853	GO:0008483	alanine--glyoxylate aminotransferase 2 homolog 1, mitochondrial; K00827 alanine-glyoxylate transaminase / (R)-3-amino-2-methylpropionate-pyruvate transaminase [EC:2.6.1.44 2.6.1.40] (A)	Alanine--glyoxylate aminotransferase 2 homolog 1, mitochondrial OS=Arabidopsis thaliana GN=AGT2 PE=2 SV=1	Aminotransferase class-III
BnaA08T0179700WE	-0.195488	0.149165	-1.22828	0.0042904	-1.01873	0.00656889	--	--	--	Plant specific eukaryotic initiation factor 4B
BnaA08T0180400WE	0.0730935	0.311842	0.283716	0.0232715	0.57215	0.00269013	GO:0004842	E3 ubiquitin-protein ligase UPL3; K10590 E3 ubiquitin-protein ligase TRIP12 [EC:2.3.2.26] (A)	E3 ubiquitin-protein ligase UPL3 OS=Arabidopsis thaliana GN=UPL3 PE=1 SV=1	HECT-domain (ubiquitin-transferase)
BnaA08T0181400WE	-0.398302	0.011594	0.262331	0.0146265	1.1883	0.00377477	GO:0008158	Niemann-Pick C1 protein; K12385 Niemann-Pick C1 protein (A)	Niemann-Pick C1 protein OS=Sus scrofa GN=NPC1 PE=2 SV=1	Sterol-sensing domain of SREBP cleavage-activation
BnaA08T0184100WE	0.000393198	0.251526	0.559772	0.0112736	1.54735	0.0112887	GO:0016020	uncharacterized LOC105650086; K15601 lysine-specific demethylase 3 [EC:1.14.11.-] (A)	CSC1-like protein ERD4 OS=Brassica juncea GN=ERD4 PE=3 SV=2	Cytosolic domain of 10TM putative phosphate transporter
BnaA08T0185000WE	-0.13295	0.0725625	-0.74319	0.00423486	-0.912606	0.00017539	GO:0003746	elongation factor 1-delta 1-like; K03232 elongation factor 1-beta (A)	Elongation factor 1-delta 2 OS=Arabidopsis thaliana GN=At2g18110 PE=1 SV=1	EF-1 guanine nucleotide exchange domain
BnaA08T0186800WE	0.0219209	0.174813	-0.478511	0.0515657	0.61414	0.0187615	GO:0003677	hypothetical protein; K06875 programmed cell death protein 5 (A)	Programmed cell death protein 5 OS=Mus musculus GN=Pdcd5 PE=1 SV=3	Double-stranded DNA-binding domain
BnaA08T0190800WE	0.355311	0.0430488	-0.12926	0.0894311	-1.3376	0.000524488	GO:0005515	26S proteasome non-ATPase regulatory subunit 11 homolog; K03036 26S proteasome regulatory subunit N6 (A)	26S proteasome non-ATPase regulatory subunit 11 homolog OS=Arabidopsis thaliana GN=RPN6 PE=1 SV=1	PCI domain
BnaA08T0195300WE	-0.166192	0.0868965	-0.0420537	0.381722	0.662813	0.0288786	--	uncharacterized LOC100792815; K03868 RING-box protein 1 (A)	GEM-like protein 1 OS=Arabidopsis thaliana GN=FIP1 PE=1 SV=1	GRAM domain
BnaA08T0209500WE	0.0900283	0.095035	-0.660374	0.0109157	-0.96775	0.0107938	GO:0003723	eukaryotic translation initiation factor 5A-2; K03263 translation initiation factor 5A (A)	Eukaryotic translation initiation factor 5A-2 OS=Arabidopsis thaliana GN=ELF5A-2 PE=1 SV=1	KOW motif
BnaA08T0210500WE	0.0851187	0.369223	0.379083	0.0575758	0.70753	0.00363336	GO:0008168	probable methyltransferase PMT28; K16302 metal transporter CNNM (A)	Probable methyltransferase PMT2 OS=Arabidopsis thaliana GN=At1g26850 PE=2 SV=2	Putative S-adenosyl-L-methionine-dependent methyltransferase
BnaA08T0211500WE	-0.0759235	0.384975	-0.306707	0.190037	-1.17715	0.0110833	--	--	--	Domain of unknown function (DUF1338)
BnaA08T0220300WE	0.0325493	0.366116	0.0167634	0.306719	-0.769338	0.0119656	GO:0006810	emp24/gp25L/p24 family of membrane trafficking proteins (ISS); K03857 phosphatidylinositol glycan, class A [EC:2.4.1.198] (A)	Transmembrane emp24 domain-containing protein p24delta5 OS=Arabidopsis thaliana GN=At1g21900 PE=1 SV=1	emp24/gp25L/p24 family/GOLD
BnaA08T0220400WE	0.0852083	0.362152	-0.327803	0.0544189	1.0357	0.0334042	GO:0016998	GRMZM2G410991; uncharacterized LOC100384051; K13473 chitin elicitor-binding protein (A)	LysM domain-containing GPI-anchored protein 1 OS=Arabidopsis thaliana GN=LYM1 PE=1 SV=1	LysM domain
BnaA08T0220800WE	-0.216739	0.0189776	-0.497868	0.00179319	-0.570275	0.000230161	GO:0006662	protein disulfide isomerase-like 1-1; K09580 protein disulfide-isomerase A1 [EC:5.3.4.1] (A)	Protein disulfide isomerase-like 1-1 OS=Arabidopsis thaliana GN=PDIL1-1 PE=1 SV=1	Thioredoxin-like domain
BnaA08T0223600WE	-0.0596458	0.106389	-0.289909	0.0644226	-0.661253	0.00387927	GO:0003872	pyrophosphate--fructose 6-phosphate 1-phosphotransferase subunit alpha 1; K00895 pyrophosphate--fructose-6-phosphate 1-phosphotransferase [EC:2.7.1.90] (A)	Pyrophosphate--fructose 6-phosphate 1-phosphotransferase subunit alpha 1 OS=Arabidopsis thaliana GN=PFP-ALPHA1 PE=2 SV=1	Phosphofructokinase
BnaA08T0225600WE	0.374438	0.0348472	-0.492898	0.0239531	-0.774969	0.0114703	GO:0003824	4-coumarate--CoA ligase-like 5; K10526 OPC-8:0 CoA ligase 1 [EC:6.2.1.-] (A)	4-coumarate--CoA ligase-like 5 OS=Arabidopsis thaliana GN=4CLL5 PE=1 SV=2	AMP-binding enzyme C-terminal domain
BnaA08T0232800WE	-0.00235622	0.255627	-0.656411	0.0313573	-0.514613	0.0316836	GO:0005634	NAP1-related protein 2; K11290 template-activating factor I (A)	NAP1-related protein 2 OS=Arabidopsis thaliana GN=NRP2 PE=1 SV=2	Nucleosome assembly protein (NAP)
BnaA08T0235500WE	0.207025	0.302319	0.226141	0.381497	1.8158	0.0162552	GO:0005507	laccase-1; K05909 laccase [EC:1.10.3.2] (A)	Laccase-1 OS=Arabidopsis thaliana GN=LAC1 PE=2 SV=1	Multicopper oxidase
BnaA08T0246100WE	0.485156	0.217611	-0.164834	0.292258	1.51099	0.0201078	GO:0003677	GK22253 gene product from transcript GK22253-RB; K14572 midasin (A)	Methyl-CpG-binding domain-containing protein 10 OS=Arabidopsis thaliana GN=MBD10 PE=1 SV=1	Methyl-CpG binding domain
BnaA08T0252200WE	-0.542081	0.00455989	-1.09017	0.0262093	-0.881785	0.0198128	GO:0016620	glyceraldehyde-3-phosphate dehydrogenase, cytosolic-like; K00134 glyceraldehyde 3-phosphate dehydrogenase [EC:1.2.1.12] (A)	Glyceraldehyde-3-phosphate dehydrogenase, cytosolic OS=Sinapis alba GN=GAPC PE=2 SV=2	Glyceraldehyde 3-phosphate dehydrogenase, NAD binding domain
BnaA08T0254300WE	0.00415859	0.366002	0.611822	0.0452477	3.65037	0.0041083	GO:0016021	high affinity nitrate transporter 2.5; K02575 MFS transporter, NNP family, nitrate/nitrite transporter (A)	High affinity nitrate transporter 2.5 OS=Arabidopsis thaliana GN=NRT2.5 PE=2 SV=1	Major Facilitator Superfamily
BnaA08T0259600WE	-0.763575	0.00690312	-0.223487	0.237987	0.505839	0.0143556	--	proline synthase co-transcribed bacterial homolog protein-like; K06997 PLP dependent protein (A)	Proline synthase co-transcribed bacterial homolog protein OS=Mus musculus GN=Prosc PE=1 SV=1	Alanine racemase, N-terminal domain
BnaA08T0260200WE	0.316691	0.010927	0.164981	0.126393	0.500108	0.0137215	GO:0004047	putative lactoylglutathione lyase; K01759 lactoylglutathione lyase [EC:4.4.1.5] (A)	Putative lactoylglutathione lyase OS=Brassica oleracea var. gemmifera PE=2 SV=1	Aminomethyltransferase folate-binding domain
BnaA08T0271700WE	-0.0323842	0.201719	-0.231801	0.00737368	-0.693767	0.0022602	GO:0003824	2,3-bisphosphoglycerate-independent phosphoglycerate mutase 1; K15633 2,3-bisphosphoglycerate-independent phosphoglycerate mutase [EC:5.4.2.12] (A)	2,3-bisphosphoglycerate-independent phosphoglycerate mutase 1 OS=Arabidopsis thaliana GN=PGM1 PE=2 SV=3	COBRA-like protein
BnaA08T0276200WE	-0.343223	0.312842	-0.377503	0.0958585	0.701627	0.0142852	GO:0003700	nuclear transcription factor Y subunit C-9-like; K08066 nuclear transcription factor Y, gamma (A)	Nuclear transcription factor Y subunit C-9 OS=Arabidopsis thaliana GN=NFYC9 PE=2 SV=1	Histone-like transcription factor (CBF/NF-Y) and archaeal histone
BnaA08T0277100WE	0.334612	0.0598582	-0.624526	0.0352577	-1.02576	0.0188271	GO:0006457	probable prefoldin subunit 4; K09550 prefoldin subunit 4 (A)	Probable prefoldin subunit 4 OS=Arabidopsis thaliana GN=AIP3 PE=1 SV=3	Prefoldin subunit
BnaA08T0279400WE	0.226516	0.154755	-0.0284681	0.23717	-0.723425	0.0104327	GO:0005743	uncharacterized LOC106362280; K18192 mitochondrial ATPase complex subunit ATP10 (A)	--	ATP10 protein
BnaA08T0279800WE	-0.216384	0.248423	0.70806	0.0274119	2.05391	0.042596	--	--	Uncharacterized protein At1g08160 OS=Arabidopsis thaliana GN=At1g08160 PE=2 SV=1	Late embryogenesis abundant protein
BnaA08T0284200WE	0.416355	0.125038	-0.709125	0.00759206	-1.07337	0.00540492	GO:0046907	ran-binding protein 1 homolog a-like; K15306 Ran-binding protein 1 (A)	Ran-binding protein 1 homolog a OS=Arabidopsis thaliana GN=RANBP1A PE=1 SV=1	RanBP1 domain
BnaA08T0290300WE	-0.0280141	0.240408	-0.0299869	0.345991	0.92829	0.00652382	GO:0005515	hypothetical protein; K19938 rabphilin-3A (A)	Synaptotagmin-5 OS=Arabidopsis thaliana GN=SYT5 PE=2 SV=1	C2 domain
BnaA08T0292300WE	-0.122935	0.253084	0.411031	0.0093303	1.89368	0.0177772	GO:0005097	TBC1 domain family member 5-like; K18469 TBC1 domain family member 5 (A)	TBC1 domain family member 13 OS=Homo sapiens GN=TBC1D13 PE=1 SV=3	Ankyrin repeats (3 copies)
BnaA08T0292800WE	-0.309429	0.0460224	0.407243	0.0831097	0.572108	0.0123393	--	KCNAB2; potassium voltage-gated channel, shaker-related subfamily, beta member 2; K04883 potassium voltage-gated channel Shaker-related subfamily A, beta member 2 (A)	Probable voltage-gated potassium channel subunit beta OS=Arabidopsis thaliana GN=KAB1 PE=1 SV=1	Aldo/keto reductase family
BnaA08T0294900WE	-3.39078	0.0531176	-2.84483	0.084548	3.52414	0.0288884	GO:0003735	40S ribosomal protein S15-1; K02958 small subunit ribosomal protein S15e (A)	40S ribosomal protein S15-1 OS=Arabidopsis thaliana GN=RPS15A PE=2 SV=1	Ribosomal protein S19
BnaA08T0296500WE	0.152931	0.198134	0.218218	0.182171	0.572852	0.0477787	--	pre-mRNA-splicing factor SLU7-A-like; K12819 pre-mRNA-processing factor SLU7 (A)	Pre-mRNA-splicing factor SLU7-A OS=Arabidopsis thaliana GN=At1g65660 PE=1 SV=2	Pre-mRNA splicing Prp18-interacting factor
BnaA08T0299300WE	-0.182571	0.178879	0.152829	0.336928	1.02156	0.00318124	GO:0005681	pre-mRNA-splicing factor 18; K12817 pre-mRNA-splicing factor 18 (A)	Pre-mRNA-splicing factor 18 OS=Mus musculus GN=Prpf18 PE=2 SV=1	pre-mRNA processing factor 4 (PRP4) like
BnaA08T0299900WE	-0.0077536	0.224518	0.347909	0.0202132	1.19927	0.020014	--	--	Protein RALF-like 1 OS=Arabidopsis thaliana GN=RALF1 PE=1 SV=1	Rapid ALkalinization Factor (RALF)
BnaA09T0002000WE	-0.0793422	0.34357	0.601734	0.00291942	1.15316	0.0260776	GO:0004252	peptidase, putative (EC:3.4.21.25); K18443 golgi-specific brefeldin A-resistance guanine nucleotide exchange factor 1 (A)	Subtilisin-like protease SBT4.14 OS=Arabidopsis thaliana GN=SBT4.14 PE=2 SV=1	Peptidase inhibitor I9
BnaA09T0006600WE	-0.204726	0.201828	0.76806	0.00951965	1.16862	0.00318928	GO:0004672	probable serine/threonine-protein kinase At5g41260; K14500 BR-signaling kinase [EC:2.7.11.1] (A)	Probable serine/threonine-protein kinase At5g41260 OS=Arabidopsis thaliana GN=At5g41260 PE=1 SV=1	TPR repeat
BnaA09T0008600WE	0.0750207	0.0865677	-0.00244624	0.382307	-0.583366	0.00785722	GO:0055085	mitochondrial adenine nucleotide transporter ADNT1; K14684 solute carrier family 25 (mitochondrial phosphate transporter), member 23/24/25/41 (A)	Mitochondrial adenine nucleotide transporter ADNT1 OS=Arabidopsis thaliana GN=ADNT1 PE=2 SV=1	Mitochondrial carrier protein
BnaA09T0008900WE	0.342757	0.30431	0.514108	0.0638812	1.42708	0.00465682	GO:0008152	UDP-glycosyltransferase 72B1; K08237 hydroquinone glucosyltransferase [EC:2.4.1.218] (A)	UDP-glycosyltransferase 72B1 OS=Arabidopsis thaliana GN=UGT72B1 PE=1 SV=1	UDP-glucoronosyl and UDP-glucosyl transferase
BnaA09T0010400WE	0.0387665	0.374506	0.320407	0.0273908	0.956662	0.00648031	GO:0000166	calcium-transporting ATPase 2, endoplasmic reticulum-type; K01537 Ca2+-transporting ATPase [EC:3.6.3.8] (A)	Calcium-transporting ATPase 2, endoplasmic reticulum-type OS=Arabidopsis thaliana GN=ECA2 PE=1 SV=1	Cation transporter/ATPase, N-terminus
BnaA09T0011200WE	0.805624	0.13435	0.442308	0.0944102	1.78285	0.0183693	--	--	Protein YLS9 OS=Arabidopsis thaliana GN=YLS9 PE=2 SV=1	Late embryogenesis abundant protein
BnaA09T0018600WE	0.384287	0.320533	-1.1032	0.0256268	-0.80455	0.00526896	GO:0005515	glutathione S-transferase F3-like; K00799 glutathione S-transferase [EC:2.5.1.18] (A)	Glutathione S-transferase F3 OS=Arabidopsis thaliana GN=GSTF3 PE=2 SV=1	Glutathione S-transferase, C-terminal domain
BnaA09T0026400WE	-0.0874943	0.388516	0.320788	0.0060905	1.50463	0.00471031	GO:0005216	two pore calcium channel protein 1; K16900 two pore calcium channel protein, plant (A)	Two pore calcium channel protein 1 OS=Arabidopsis thaliana GN=TPC1 PE=1 SV=1	EF-hand domain pair
BnaA09T0031000WE	0.518885	0.0643965	0.19708	0.188034	0.700092	0.0197343	GO:0008168	--	Probable methyltransferase PMT16 OS=Arabidopsis thaliana GN=At2g45750 PE=3 SV=1	Putative S-adenosyl-L-methionine-dependent methyltransferase
BnaA09T0031300WE	0.147461	0.0109525	0.872498	0.00593455	1.92537	0.0146076	--	lysine histidine transporter-like 1; K14209 solute carrier family 36 (proton-coupled amino acid transporter) (A)	Lysine histidine transporter 1 OS=Arabidopsis thaliana GN=LHT1 PE=1 SV=1	Transmembrane amino acid transporter protein
BnaA09T0044900WE	-0.365602	0.381164	0.725028	0.0197669	0.875002	0.0161846	GO:0004866	WD repeat-containing protein 48; K15361 WD repeat-containing protein 48 (A)	ER membrane protein complex subunit 6 OS=Mus musculus GN=Emc6 PE=3 SV=1	Trypsin and protease inhibitor
BnaA09T0047200WE	0.105379	0.292026	-0.439179	0.0178886	-0.884756	0.0017514	--	bifunctional L-3-cyanoalanine synthase/cysteine synthase D2-like; K01738 cysteine synthase A [EC:2.5.1.47] (A)	Bifunctional L-3-cyanoalanine synthase/cysteine synthase D2 OS=Arabidopsis thaliana GN=CYSD2 PE=1 SV=1	Pyridoxal-phosphate dependent enzyme
BnaA09T0048500WE	0.112513	0.2112	0.0909405	0.134103	1.36396	0.0274804	GO:0003824	BCA3; branched chain amino acid aminotransferase (EC:2.6.1.42); K00826 branched-chain amino acid aminotransferase [EC:2.6.1.42] (A)	Branched-chain-amino-acid aminotransferase-like protein 2 OS=Arabidopsis thaliana GN=At5g27410 PE=2 SV=1	Amino-transferase class IV
BnaA09T0050000WE	0.0131055	0.310347	2.00425	0.0181142	1.25287	0.0306376	--	--	Protein RALF-like 22 OS=Arabidopsis thaliana GN=RALFL22 PE=3 SV=1	Rapid ALkalinization Factor (RALF)
BnaA09T0061200WE	0.547299	0.0680086	-0.472096	0.135964	2.03283	0.0169288	GO:0004672	putative inactive receptor-like protein kinase At1g64210; K04733 interleukin-1 receptor-associated kinase 4 [EC:2.7.11.1] (A)	Inactive leucine-rich repeat receptor-like serine/threonine-protein kinase At5g24100 OS=Arabidopsis thaliana GN=At5g24100 PE=2 SV=1	Leucine rich repeat N-terminal domain
BnaA09T0066700WE	-0.0632426	0.386202	-0.387389	0.105977	-0.56601	0.0249816	GO:0003735	40S ribosomal protein S19-3-like; K02966 small subunit ribosomal protein S19e (A)	40S ribosomal protein S19-3 OS=Arabidopsis thaliana GN=RPS19C PE=2 SV=1	Ribosomal protein S19e
BnaA09T0074100WE	0.118283	0.335807	0.297213	0.131732	-1.14323	0.00640828	GO:0004407	histone deacetylase 6; K06067 histone deacetylase 1/2 [EC:3.5.1.98] (A)	Histone deacetylase 6 OS=Arabidopsis thaliana GN=HDA6 PE=1 SV=1	Histone deacetylase domain
BnaA09T0074200WE	-0.285306	0.141697	0.364792	0.0366883	0.771172	0.0215086	GO:0003676	DEAD-box ATP-dependent RNA helicase 30-like; K12823 ATP-dependent RNA helicase DDX5/DBP2 [EC:3.6.4.13] (A)	DEAD-box ATP-dependent RNA helicase 30 OS=Arabidopsis thaliana GN=RH30 PE=2 SV=2	Helicase conserved C-terminal domain
BnaA09T0074500WE	-0.0286245	0.383288	0.057631	0.365326	0.956689	0.0284628	GO:0016787	hypothetical protein; K12867 pre-mRNA-splicing factor SYF1 (A)	Probable inactive purple acid phosphatase 29 OS=Arabidopsis thaliana GN=PAP29 PE=2 SV=1	Calcineurin-like phosphoesterase
BnaA09T0076200WE	-0.0899669	0.152396	0.19037	0.147506	1.06533	0.00516616	--	DNA ligase 1-like; K17046 protein DEK (A)	--	DEK C terminal domain
BnaA09T0078700WE	0.0299456	0.323202	-0.125985	0.294194	-0.569843	0.0216707	GO:0003935	bifunctional riboflavin biosynthesis protein RIBA 1, chloroplastic-like; K14652 3,4-dihydroxy 2-butanone 4-phosphate synthase / GTP cyclohydrolase II [EC:4.1.99.12 3.5.4.25] (A)	Bifunctional riboflavin biosynthesis protein RIBA 1, chloroplastic OS=Arabidopsis thaliana GN=RIBA1 PE=1 SV=2	GTP cyclohydrolase II
BnaA09T0083500WE	-0.139631	0.077	-0.224259	0.155799	0.6309	0.0454113	--	putative nuclear matrix constituent protein 1-like protein; K00826 branched-chain amino acid aminotransferase [EC:2.6.1.42] (A)	Protein CROWDED NUCLEI 4 OS=Arabidopsis thaliana GN=CRWN4 PE=1 SV=2	--
BnaA09T0083900WE	-0.0480739	0.0637512	-0.144055	0.195737	0.506697	0.0374236	--	hypothetical protein; K01188 beta-glucosidase [EC:3.2.1.21] (A)	Uncharacterized protein At3g49720 OS=Arabidopsis thaliana GN=At3g49720 PE=2 SV=1	--
BnaA09T0088600WE	-0.53783	0.105751	0.295881	0.0213168	0.959676	0.0207352	GO:0005507	L-ascorbate oxidase homolog; K19791 iron transport multicopper oxidase (A)	L-ascorbate oxidase homolog OS=Nicotiana tabacum PE=2 SV=1	Multicopper oxidase
BnaA09T0094100WE	-1.09949	0.0811026	-0.68014	0.143444	0.677013	0.0323767	--	uncharacterized LOC103646289; K02883 large subunit ribosomal protein L18e (A)	pEARLI1-like lipid transfer protein 1 OS=Arabidopsis thaliana GN=AZI1 PE=1 SV=1	Hydrophobic seed protein
BnaA09T0094800WE	-0.174645	0.37446	-0.463691	0.113852	-1.13237	0.00613254	GO:0005515	glutathione S-transferase F14; K00799 glutathione S-transferase [EC:2.5.1.18] (A)	Glutathione S-transferase F14 OS=Arabidopsis thaliana GN=GSTF14 PE=2 SV=1	Glutathione S-transferase, C-terminal domain
BnaA09T0096000WE	-0.0370063	0.0567568	-0.428648	0.0227276	0.783311	0.00845495	GO:0004601	peroxidase 32; K00430 peroxidase [EC:1.11.1.7] (A)	Peroxidase 32 OS=Arabidopsis thaliana GN=PER32 PE=1 SV=3	Peroxidase
BnaA09T0096200WE	0.186837	0.0438636	-0.70317	0.0591014	-1.16136	0.00405024	GO:0000103	adenylyl-sulfate kinase 1, chloroplastic; K00860 adenylylsulfate kinase [EC:2.7.1.25] (A)	Adenylyl-sulfate kinase 1, chloroplastic OS=Arabidopsis thaliana GN=APK1 PE=1 SV=1	Adenylylsulphate kinase
BnaA09T0102100WE	0.00547411	0.345434	-0.169139	0.20653	1.60768	0.00223576	GO:0004413	homoserine kinase-like; K00872 homoserine kinase [EC:2.7.1.39] (A)	Homoserine kinase OS=Arabidopsis thaliana GN=HSK PE=1 SV=1	GHMP kinases C terminal
BnaA09T0104200WE	0.0548319	0.321937	-0.0101213	0.354087	-0.99919	0.0108618	GO:0004672	protein kinase, putative (EC:2.7.10.2); K17535 serine/threonine-protein kinase TNNI3K [EC:2.7.11.1] (A)	Serine/threonine-protein kinase HT1 OS=Arabidopsis thaliana GN=HT1 PE=1 SV=1	ACT domain
BnaA09T0107200WE	-0.00589489	0.207749	-0.22317	0.196453	2.44154	0.0383238	GO:0006869	--	Non-specific lipid-transfer protein 8 OS=Arabidopsis thaliana GN=LTP8 PE=3 SV=1	Protease inhibitor/seed storage/LTP family
BnaA09T0109100WE	0.460778	0.160759	0.315475	0.0119735	1.27564	0.00757001	--	--	Calmodulin-binding protein 60 C OS=Arabidopsis thaliana GN=CBP60C PE=2 SV=1	Calmodulin binding protein-like
BnaA09T0109800WE	1.46342	0.173753	-0.44059	0.0372483	1.30091	0.0191456	GO:0000166	ATPase 1, plasma membrane-type; K01535 H+-transporting ATPase [EC:3.6.3.6] (A)	ATPase 1, plasma membrane-type OS=Arabidopsis thaliana GN=AHA1 PE=1 SV=3	Cation transporter/ATPase, N-terminus
BnaA09T0110300WE	-0.463228	0.0125508	0.104338	0.118568	0.501393	0.0204404	--	mitochondrial outer membrane import complex protein METAXIN; K17776 metaxin (A)	Mitochondrial outer membrane import complex protein METAXIN OS=Arabidopsis thaliana GN=MTX1 PE=1 SV=1	--
BnaA09T0114500WE	0.0297621	0.287866	-0.560295	0.0460923	0.879307	0.0371757	--	--	Golgin candidate 1 OS=Arabidopsis thaliana GN=GC1 PE=2 SV=2	Golgin subfamily A member 5
BnaA09T0123000WE	-0.00170333	0.377935	0.473624	0.182724	1.16908	0.017808	--	laccase-11-like; K05909 laccase [EC:1.10.3.2] (A)	--	--
BnaA09T0126100WE	0.0282227	0.156109	-0.0855787	0.31436	-0.685953	0.00243546	GO:0016491	monodehydroascorbate reductase, chloroplastic; K08232 monodehydroascorbate reductase (NADH) [EC:1.6.5.4] (A)	Monodehydroascorbate reductase, chloroplastic OS=Arabidopsis thaliana GN=At1g63940 PE=2 SV=3	Pyridine nucleotide-disulphide oxidoreductase
BnaA09T0127500WE	0.173882	0.0481842	-0.262498	0.0289848	-0.679361	0.00400166	GO:0004616	6-phosphogluconate dehydrogenase, decarboxylating 1, chloroplastic; K00033 6-phosphogluconate dehydrogenase [EC:1.1.1.44 1.1.1.343] (A)	6-phosphogluconate dehydrogenase, decarboxylating 1, chloroplastic OS=Arabidopsis thaliana GN=At1g64190 PE=1 SV=1	NAD binding domain of 6-phosphogluconate dehydrogenase
BnaA09T0134600WE	0.0856536	0.3856	-0.220967	0.0149246	-1.04706	0.00745291	GO:0005742	mitochondrial import receptor subunit TOM7-2-like; K17771 mitochondrial import receptor subunit TOM7 (A)	Mitochondrial import receptor subunit TOM7-2 OS=Arabidopsis thaliana GN=TOM7-2 PE=2 SV=1	TOM7 family
BnaA09T0134800WE	0.281456	0.0407188	0.0593143	0.2709	1.11216	0.00497699	GO:0015991	V-type proton ATPase subunit E3-like; K02150 V-type H+-transporting ATPase subunit E (A)	V-type proton ATPase subunit E3 OS=Arabidopsis thaliana GN=VHA-E3 PE=2 SV=1	ATP synthase (E/31 kDa) subunit
BnaA09T0138300WE	0.0387559	0.138351	-0.0228959	0.196566	-0.625914	0.00254008	GO:0003922	GMP synthase [glutamine-hydrolyzing]-like; K01951 GMP synthase (glutamine-hydrolysing) [EC:6.3.5.2] (A)	GMP synthase [glutamine-hydrolyzing] OS=Aquifex aeolicus (strain VF5) GN=guaA PE=3 SV=1	Asparagine synthase
BnaA09T0139500WE	0.299257	0.0270905	0.296098	0.130453	1.56538	0.00513245	--	--	--	--
BnaA09T0141600WE	0.196391	0.112424	-0.0308457	0.165261	-0.501839	0.00770238	GO:0008831	probable rhamnose biosynthetic enzyme 1; K12451 3,5-epimerase/4-reductase [EC:5.1.3.- 1.1.1.-] (A)	Bifunctional dTDP-4-dehydrorhamnose 3,5-epimerase/dTDP-4-dehydrorhamnose reductase OS=Arabidopsis thaliana GN=NRS/ER PE=1 SV=1	RmlD substrate binding domain
BnaA09T0142800WE	-0.185293	0.131779	0.122511	0.303856	-1.2414	0.00729625	GO:0006520	aspartate aminotransferase, cytoplasmic isozyme 2-like; K14454 aspartate aminotransferase, cytoplasmic [EC:2.6.1.1] (A)	Aspartate aminotransferase, cytoplasmic isozyme 2 OS=Arabidopsis thaliana GN=ASP4 PE=2 SV=2	Aminotransferase class I and II
BnaA09T0143600WE	-0.589052	0.0319644	0.203064	0.122395	0.507004	0.0149688	GO:0009058	NADH dehydrogenase (ubiquinone) complex I, assembly factor 6; K18163 NADH dehydrogenase [ubiquinone] 1 alpha subcomplex assembly factor 6 (A)	NADH dehydrogenase (ubiquinone) complex I, assembly factor 6 OS=Rattus norvegicus GN=Ndufaf6 PE=3 SV=1	Squalene/phytoene synthase
BnaA09T0149400WE	-0.20199	0.0466879	0.202731	0.126958	0.811001	0.0193563	--	uncharacterized LOC102593685; K14826 FK506-binding nuclear protein [EC:5.2.1.8] (A)	Mediator-associated protein 1 OS=Arabidopsis thaliana GN=At4g25210 PE=1 SV=1	Protein of unknown function, DUF573
BnaA09T0163900WE	-0.444545	0.118318	0.309259	0.156534	1.75236	0.0152156	GO:0004553	hypothetical protein; K01181 endo-1,4-beta-xylanase [EC:3.2.1.8] (A)	Endo-1,4-beta-xylanase A OS=Thermoanaerobacterium saccharolyticum GN=xynA PE=1 SV=1	Glycosyl hydrolase family 10
BnaA09T0166100WE	-0.536431	0.206705	0.207614	0.169182	1.35431	0.0125457	--	hypothetical protein; K16221 transcription factor TCP21 (protein CCA1 HIKING EXPEDITION) (A)	Transcription factor TCP8 OS=Arabidopsis thaliana GN=TCP8 PE=1 SV=1	TCP family transcription factor
BnaA09T0166200WE	0.0327697	0.024773	-0.0949379	0.276308	-0.903776	0.00221431	GO:0000105	ATP phosphoribosyltransferase 1, chloroplastic-like; K00765 ATP phosphoribosyltransferase [EC:2.4.2.17] (A)	ATP phosphoribosyltransferase 1, chloroplastic OS=Arabidopsis thaliana GN=HISN1A PE=1 SV=1	HisG, C-terminal domain
BnaA09T0168400WE	0.65437	0.0339667	0.173265	0.21753	0.60002	0.0114343	GO:0006508	pyrrolidone-carboxylate peptidase 1; K01304 pyroglutamyl-peptidase [EC:3.4.19.3] (A)	Pyrrolidone-carboxylate peptidase OS=Pyrococcus furiosus (strain ATCC 43587 / DSM 3638 / JCM 8422 / Vc1) GN=pcp PE=1 SV=1	Pyroglutamyl peptidase
BnaA09T0170100WE	0.125411	0.160221	-0.607182	0.0311196	-0.857302	0.0118069	GO:0005509	calreticulin-1-like; K08057 calreticulin (A)	Calreticulin-1 OS=Arabidopsis thaliana GN=CRT1 PE=1 SV=1	Calreticulin family
BnaA09T0172700WE	0.43916	0.0170834	0.258875	0.098141	0.743965	0.0104759	--	uncharacterized LOC105170420; K20100 YTH domain-containing protein 1 (A)	B2 protein OS=Daucus carota PE=2 SV=1	Development and cell death domain
BnaA09T0172900WE	-0.0438607	0.147029	0.773788	0.0223251	1.03336	0.0350159	GO:0004672	probable serine/threonine-protein kinase At1g54610; K08819 cyclin-dependent kinase 12/13 [EC:2.7.11.22 2.7.11.23] (A)	Probable serine/threonine-protein kinase At1g54610 OS=Arabidopsis thaliana GN=At1g54610 PE=1 SV=1	Protein kinase domain
BnaA09T0174300WE	-0.185009	0.053734	0.130912	0.167292	0.958771	0.0371948	GO:0030145	uncharacterized LOC101250545; K11426 SET and MYND domain-containing protein (A)	Germin-like protein subfamily 1 member 8 OS=Arabidopsis thaliana GN=GLP9 PE=2 SV=2	Cupin
BnaA09T0176800WE	-0.359003	0.107178	-0.395205	0.0286452	0.612498	0.00170487	GO:0003676	splicing factor U2af small subunit B; K12836 splicing factor U2AF 35 kDa subunit (A)	Splicing factor U2af small subunit B OS=Arabidopsis thaliana GN=U2AF35B PE=1 SV=1	RNA recognition motif. (a.k.a. RRM, RBD, or RNP domain)
BnaA09T0183600WE	-0.250272	0.159276	0.166764	0.154099	0.578808	0.0329958	GO:0003993	Os03g0332500; K02866 large subunit ribosomal protein L10e (A)	Acid phosphatase 1 OS=Solanum lycopersicum GN=APS1 PE=2 SV=1	HAD superfamily, subfamily IIIB (Acid phosphatase)
BnaA09T0184900WE	0.192194	0.00925314	-0.242692	0.13838	1.42186	0.0165209	--	fasciclin-like arabinogalactan protein 4; K19519 transforming growth factor-beta-induced protein (A)	Fasciclin-like arabinogalactan protein 13 OS=Arabidopsis thaliana GN=FLA13 PE=1 SV=1	Fasciclin domain
BnaA09T0188200WE	-0.0543501	0.309008	-0.535113	0.00544085	-0.512152	0.00308245	GO:0004550	Bc-NDPK1; nucleoside diphosphate kinase 1-like; K00940 nucleoside-diphosphate kinase [EC:2.7.4.6] (A)	Nucleoside diphosphate kinase 1 OS=Arabidopsis thaliana GN=NDK1 PE=1 SV=1	Nucleoside diphosphate kinase
BnaA09T0193800WE	-0.0988463	0.188064	0.377946	0.00417507	0.869652	0.0118209	GO:0003924	atlastin-like; K17339 atlastin [EC:3.6.5.-] (A)	Interferon-induced guanylate-binding protein 2 OS=Homo sapiens GN=GBP2 PE=1 SV=3	Guanylate-binding protein, C-terminal domain
BnaA09T0197200WE	0.0385775	0.352745	0.191113	0.0910216	0.945153	0.00228436	--	abscisic acid receptor PYR1-like; K14496 abscisic acid receptor PYR/PYL family (A)	Abscisic acid receptor PYR1 OS=Arabidopsis thaliana GN=PYR1 PE=1 SV=1	Polyketide cyclase / dehydrase and lipid transport
BnaA09T0200400WE	0.141994	0.233834	-0.959064	0.0038884	-1.03105	0.00396491	--	suppressor protein STM1-like; K13199 plasminogen activator inhibitor 1 RNA-binding protein (A)	--	Stm1
BnaA09T0204100WE	0.259292	0.343817	0.15271	0.378474	0.595621	0.0208588	GO:0003735	30S ribosomal protein S17, chloroplastic-like; K02961 small subunit ribosomal protein S17 (A)	30S ribosomal protein S17, chloroplastic OS=Arabidopsis thaliana GN=RPS17 PE=1 SV=1	Ribosomal protein S17
BnaA09T0210400WE	-0.0592307	0.116451	0.381102	0.00513287	0.799301	0.00352578	GO:0005509	splicing factor U2af large subunit B-like; K12837 splicing factor U2AF 65 kDa subunit (A)	Cell division cycle and apoptosis regulator protein 1 OS=Homo sapiens GN=CCAR1 PE=1 SV=2	DBC1
BnaA09T0216100WE	0.459806	0.0692155	0.0266748	0.144115	1.4499	0.00180846	GO:0016747	deacetylvindoline O-acetyltransferase-like; K13065 shikimate O-hydroxycinnamoyltransferase [EC:2.3.1.133] (A)	Vinorine synthase OS=Rauvolfia serpentina GN=ACT PE=1 SV=2	Transferase family
BnaA09T0217400WE	-0.194598	0.0443578	-0.44167	0.0016296	-0.76212	0.00120465	GO:0016491	ferredoxin--NADP reductase, root isozyme 1, chloroplastic; K02641 ferredoxin--NADP+ reductase [EC:1.18.1.2] (A)	Ferredoxin--NADP reductase, root isozyme 1, chloroplastic OS=Arabidopsis thaliana GN=RFNR1 PE=2 SV=2	Oxidoreductase FAD-binding domain
BnaA09T0221800WE	-0.504347	0.063313	0.47654	0.0902782	1.10288	0.00613722	--	--	Mediator of RNA polymerase II transcription subunit 16 OS=Arabidopsis thaliana GN=MED16 PE=1 SV=1	--
BnaA09T0227400WE	-0.373097	0.0261407	0.811006	0.00404196	0.92781	0.0242381	GO:0003872	pyrophosphate--fructose 6-phosphate 1-phosphotransferase subunit beta 2; K00895 pyrophosphate--fructose-6-phosphate 1-phosphotransferase [EC:2.7.1.90] (A)	Pyrophosphate--fructose 6-phosphate 1-phosphotransferase subunit beta 2 OS=Arabidopsis thaliana GN=PFP-BETA2 PE=3 SV=1	Phosphofructokinase
BnaA09T0227900WE	0.22456	0.255693	-0.569322	0.0698217	0.58829	0.0297159	GO:0003924	EH domain-containing protein 2; K12483 EH domain-containing protein 1 (A)	EH domain-containing protein 2 OS=Arabidopsis thaliana GN=EHD2 PE=1 SV=1	Cytoskeletal-regulatory complex EF hand
BnaA09T0229800WE	0.374379	0.0654469	-0.668482	0.0521066	0.99491	0.00143314	--	--	--	--
BnaA09T0231100WE	-0.174114	0.263799	0.429273	0.00503526	2.20559	0.00702045	GO:0004857	pectinesterase-like; K01051 pectinesterase [EC:3.1.1.11] (A)	21 kDa protein OS=Daucus carota PE=2 SV=1	Plant invertase/pectin methylesterase inhibitor
BnaA09T0237900WE	-0.528829	0.11002	-0.243918	0.0192012	0.889253	0.0305492	GO:0004601	peroxidase 39; K00430 peroxidase [EC:1.11.1.7] (A)	Peroxidase 39 OS=Arabidopsis thaliana GN=PER39 PE=1 SV=1	Peroxidase
BnaA09T0242900WE	-0.418477	0.100521	0.0870378	0.286108	0.946541	0.0161219	--	--	--	--
BnaA09T0243200WE	-0.0335726	0.136019	0.164493	0.179208	0.558236	0.00158805	GO:0006725	hypothetical protein; K02510 4-hydroxy-2-oxoheptanedioate aldolase [EC:4.1.2.52] (A)	2-keto-3-deoxy-L-rhamnonate aldolase OS=Escherichia coli (strain SMS-3-5 / SECEC) GN=rhmA PE=3 SV=1	HpcH/HpaI aldolase/citrate lyase family
BnaA09T0255900WE	-0.334253	0.231867	0.276327	0.0145706	1.82665	0.0125789	--	hypothetical protein; K02984 small subunit ribosomal protein S3Ae (A)	Uncharacterized protein At4g06744 OS=Arabidopsis thaliana GN=At4g06744 PE=2 SV=1	-
BnaA09T0356400WE	-0.401036	0.00781699	0.753742	0.0509328	1.20887	0.0466785	--	--	--	Uncharacterized protein conserved in bacteria (DUF2062)
BnaA09T0365200WE	-0.291684	0.11385	0.14361	0.172326	0.604816	0.0210544	GO:0003677	transcription factor IWS1-like; K17498 transcription factor SPN1 (A)	Protein IWS1 homolog OS=Mus musculus GN=Iws1 PE=1 SV=1	TFIIS helical bundle-like domain
BnaA09T0369000WE	-0.0164575	0.0885028	-1.13062	0.0166341	-0.739677	0.0023827	GO:0000062	acyl-CoA-binding protein; K08762 diazepam-binding inhibitor (GABA receptor modulator, acyl-CoA-binding protein) (A)	Acyl-CoA-binding protein OS=Brassica napus PE=3 SV=1	Acyl CoA binding protein
BnaA09T0377000WE	-0.251072	0.0445294	0.924342	0.000552048	1.68327	0.0162536	GO:0003824	cysteine desulfurase, mitochondrial precursor; K04487 cysteine desulfurase [EC:2.8.1.7] (A)	Tetrahydrocannabinolic acid synthase OS=Cannabis sativa PE=1 SV=1	Berberine and berberine like
BnaA09T0379800WE	0.341771	0.0108089	-0.301802	0.0322164	-1.36935	0.00115068	GO:0016491	ferredoxin--NADP reductase, root isozyme 2, chloroplastic; K02641 ferredoxin--NADP+ reductase [EC:1.18.1.2] (A)	Ferredoxin--NADP reductase, root isozyme 2, chloroplastic OS=Arabidopsis thaliana GN=RFNR2 PE=1 SV=1	Oxidoreductase NAD-binding domain
BnaA09T0382800WE	-0.23178	0.0760756	-1.04257	0.00273978	-0.851155	0.0010619	GO:0003746	elongation factor 1-delta 1; K03232 elongation factor 1-beta (A)	Elongation factor 1-delta 2 OS=Arabidopsis thaliana GN=At2g18110 PE=1 SV=1	EF-1 guanine nucleotide exchange domain
BnaA09T0392800WE	-0.559953	0.0557349	0.329025	0.275071	-1.81413	0.00125547	GO:0016747	spermidine coumaroyl CoA acyltransferase-like; K15400 omega-hydroxypalmitate O-feruloyl transferase [EC:2.3.1.188] (A)	Spermidine coumaroyl CoA acyltransferase OS=Arabidopsis thaliana GN=SCT PE=1 SV=1	Transferase family
BnaA09T0399000WE	-0.0474346	0.0667496	0.348591	0.193261	1.34669	0.014311	--	glucuronoxylan 4-O-methyltransferase 1; K18801 glucuronoxylan 4-O-methyltransferase [EC:2.1.1.112] (A)	Glucuronoxylan 4-O-methyltransferase 1 OS=Arabidopsis thaliana GN=GXM1 PE=1 SV=1	Polysaccharide biosynthesis
BnaA09T0405300WE	0.633253	0.0473151	-0.422192	0.0381461	-1.50456	0.00125832	--	anthranilate synthase beta subunit 1, chloroplastic-like; K01658 anthranilate synthase component II [EC:4.1.3.27] (A)	Anthranilate synthase beta subunit 1, chloroplastic OS=Arabidopsis thaliana GN=ASB1 PE=1 SV=1	Glutamine amidotransferase class-I
BnaA09T0406800WE	-0.120498	0.0130635	-0.0719994	0.316077	-0.608087	0.0402689	GO:0000166	glutamine--tRNA ligase, cytoplasmic; K01886 glutaminyl-tRNA synthetase [EC:6.1.1.18] (A)	Glutamine--tRNA ligase, cytoplasmic OS=Arabidopsis thaliana GN=OVA9 PE=2 SV=1	Glutaminyl-tRNA synthetase, non-specific RNA binding region part 2
BnaA09T0416500WE	-0.239688	0.253542	0.450158	0.0772686	1.26525	0.00161651	--	--	--	Domain of unknown function (DUF1338)
BnaA09T0416900WE	0.00640462	0.369472	-0.597825	0.0322652	-0.896549	0.00984812	--	caprin1, m11s1, rng105; cell cycle associated protein 1; K18743 caprin-1 (A)	Caprin-1 OS=Bos taurus GN=CAPRIN1 PE=2 SV=1	--
BnaA09T0417200WE	0.306881	0.156989	-0.559302	0.00379208	-0.662143	0.0142686	GO:0005515	glutathione S-transferase U13-like; K00799 glutathione S-transferase [EC:2.5.1.18] (A)	Glutathione S-transferase U13 OS=Arabidopsis thaliana GN=GSTU13 PE=2 SV=1	Glutathione S-transferase, C-terminal domain
BnaA09T0423000WE	0.568175	0.0855595	-0.167606	0.233464	-0.762228	0.0167112	GO:0006508	pyroglutamyl-peptidase 1-like protein; K01304 pyroglutamyl-peptidase [EC:3.4.19.3] (A)	Pyrrolidone-carboxylate peptidase OS=Pyrococcus furiosus (strain ATCC 43587 / DSM 3638 / JCM 8422 / Vc1) GN=pcp PE=1 SV=1	Pyroglutamyl peptidase
BnaA09T0426400WE	0.42515	0.0221745	0.260706	0.146565	1.15033	0.00640421	GO:0006952	--	MLP-like protein 31 OS=Arabidopsis thaliana GN=MLP31 PE=2 SV=2	Pathogenesis-related protein Bet v I family
BnaA09T0437900WE	-0.108481	0.187776	0.0954954	0.377057	0.886081	0.0441083	GO:0004672	casein kinase II subunit alpha-like; K03097 casein kinase II subunit alpha [EC:2.7.11.1] (A)	Casein kinase II subunit alpha-2 OS=Arabidopsis thaliana GN=CKA2 PE=2 SV=3	Protein kinase domain
BnaA09T0447100WE	0.0469123	0.225095	0.43458	0.212855	0.753239	0.0287924	--	vacuolar protein sorting-associated protein 35C; K18468 vacuolar protein sorting-associated protein 35 (A)	Vacuolar protein sorting-associated protein 35C OS=Arabidopsis thaliana GN=VPS35C PE=2 SV=1	Vacuolar protein sorting-associated protein 35
BnaA09T0448900WE	0.940148	0.180205	0.605793	0.0200528	1.09748	0.00265669	GO:0005507	L-ascorbate oxidase homolog; K19791 iron transport multicopper oxidase (A)	L-ascorbate oxidase homolog OS=Nicotiana tabacum PE=2 SV=1	Multicopper oxidase
BnaA09T0450700WE	0.184283	0.251133	0.448655	0.0185731	0.777353	0.00129632	GO:0006810	patellin-6-like; K19996 phosphatidylinositol transfer protein SFH5 (A)	Patellin-6 OS=Arabidopsis thaliana GN=PATL6 PE=2 SV=1	CRAL/TRIO, N-terminal domain
BnaA09T0456600WE	-0.131768	0.0580536	-0.440607	0.219614	-1.12592	0.0462624	GO:0004806	lipase-like PAD4; K18875 enhanced disease susceptibility 1 protein (A)	Lipase-like PAD4 OS=Arabidopsis thaliana GN=PAD4 PE=1 SV=1	Lipase (class 3)
BnaA09T0457400WE	-0.492681	0.099307	0.325415	0.0962527	0.990864	0.0487553	--	--	Protein YLS9 OS=Arabidopsis thaliana GN=YLS9 PE=2 SV=1	Late embryogenesis abundant protein
BnaA09T0464900WE	0.303034	0.055779	0.134127	0.088982	0.515323	0.0044426	GO:0005215	aquaporin PIP2-1; K09872 aquaporin PIP (A)	Aquaporin PIP2-1 OS=Arabidopsis thaliana GN=PIP2-1 PE=1 SV=1	Major intrinsic protein
BnaA09T0469100WE	0.437162	0.0333619	-0.699574	0.0115726	-0.572607	0.00295938	GO:0006950	--	Universal stress protein A-like protein OS=Arabidopsis thaliana GN=At3g01520 PE=1 SV=2	Universal stress protein family
BnaA09T0470800WE	0.967469	0.0349997	0.698094	0.0235093	2.43303	0.0162457	--	--	Late embryogenesis abundant protein At1g64065 OS=Arabidopsis thaliana GN=At1g64065 PE=2 SV=1	Late embryogenesis abundant protein
BnaA09T0472500WE	-0.403177	0.0655181	0.254455	0.172498	0.58921	0.0356851	GO:0004190	protein ASPARTIC PROTEASE IN GUARD CELL 1-like; K01381 saccharopepsin [EC:3.4.23.25] (A)	Aspartic proteinase nepenthesin-1 OS=Nepenthes gracilis GN=nep1 PE=1 SV=1	Xylanase inhibitor C-terminal
BnaA09T0474500WE	-0.139688	0.231865	0.124656	0.0200991	0.90813	0.0029501	GO:0005515	structural maintenance of chromosomes protein 1; K06636 structural maintenance of chromosome 1 (A)	Structural maintenance of chromosomes protein 1 OS=Arabidopsis thaliana GN=SMC1 PE=2 SV=2	SMC proteins Flexible Hinge Domain
BnaA09T0477700WE	-0.169441	0.0233912	-0.414253	0.00796725	-0.646887	0.000812464	GO:0006662	protein disulfide isomerase-like 1-3; K09580 protein disulfide-isomerase A1 [EC:5.3.4.1] (A)	Protein disulfide isomerase-like 1-3 OS=Arabidopsis thaliana GN=PDIL1-3 PE=2 SV=1	Thioredoxin-like domain
BnaA09T0479100WE	0.375304	0.102908	0.137485	0.0735747	1.22793	0.0299576	GO:0016872	chalcone--flavonone isomerase; K01859 chalcone isomerase [EC:5.5.1.6] (A)	Chalcone--flavonone isomerase OS=Raphanus sativus GN=CHI PE=2 SV=1	Chalcone-flavanone isomerase
BnaA09T0483000WE	0.0588816	0.312328	-0.0519536	0.151494	-0.828151	0.0136742	GO:0004349	delta-1-pyrroline-5-carboxylate synthase B-like; K12657 delta-1-pyrroline-5-carboxylate synthetase [EC:2.7.2.11 1.2.1.41] (A)	Delta-1-pyrroline-5-carboxylate synthase B OS=Arabidopsis thaliana GN=P5CSB PE=2 SV=1	Aldehyde dehydrogenase family
BnaA09T0486800WE	-0.162903	0.313905	-0.330682	0.233062	1.08694	0.032418	GO:0006826	ferritin-1; K00522 ferritin heavy chain [EC:1.16.3.2] (A)	Ferritin-3, chloroplastic OS=Arabidopsis thaliana GN=FER3 PE=2 SV=1	Ferritin-like domain
BnaA09T0497200WE	0.0450618	0.359993	-0.670684	0.0357729	-0.704225	0.0244754	GO:0003743	eukaryotic translation initiation factor 3 subunit E; K03250 translation initiation factor 3 subunit E (A)	Eukaryotic translation initiation factor 3 subunit E OS=Nematostella vectensis GN=v1g163572 PE=3 SV=1	PCI domain
BnaA09T0497400WE	0.0378353	0.139825	0.25174	0.0185265	0.750507	0.0047977	GO:0000166	putative calcium-transporting ATPase 11, plasma membrane-type; K01537 Ca2+-transporting ATPase [EC:3.6.3.8] (A)	Putative calcium-transporting ATPase 11, plasma membrane-type OS=Arabidopsis thaliana GN=ACA11 PE=1 SV=1	Cation transporter/ATPase, N-terminus
BnaA09T0505600WE	-0.305659	0.0198904	-0.116738	0.0232486	-0.547527	0.00891194	GO:0004455	ketol-acid reductoisomerase, chloroplastic-like; K00053 ketol-acid reductoisomerase [EC:1.1.1.86] (A)	Ketol-acid reductoisomerase, chloroplastic OS=Arabidopsis thaliana GN=At3g58610 PE=2 SV=2	Acetohydroxy acid isomeroreductase, NADPH-binding domain
BnaA09T0515700WE	0.592809	0.0432514	0.255918	0.00665581	0.699556	0.0257428	GO:0003924	dynamin-related protein 1E; K01528 dynamin GTPase [EC:3.6.5.5] (A)	Dynamin-related protein 1E OS=Arabidopsis thaliana GN=DRP1E PE=1 SV=1	Dynamin GTPase effector domain
BnaA09T0519800WE	-0.00942097	0.343425	-0.163787	0.0953371	-0.587457	0.00574667	GO:0003824	transketolase-1, chloroplastic-like; K00615 transketolase [EC:2.2.1.1] (A)	Transketolase-1, chloroplastic OS=Arabidopsis thaliana GN=TKL-1 PE=1 SV=1	Transketolase, C-terminal domain
BnaA09T0519900WE	0.337227	0.218253	-0.497195	0.115763	-1.75027	0.00538499	GO:0003735	40S ribosomal protein S13-2; K02953 small subunit ribosomal protein S13e (A)	40S ribosomal protein S13-2 OS=Arabidopsis thaliana GN=RPS13B PE=2 SV=1	Ribosomal protein S15
BnaA09T0520800WE	-0.110379	0.365996	-0.210177	0.144582	1.27704	0.0236398	--	serine/threonine-protein phosphatase 2A 65 kDa regulatory subunit A beta isoform-like; K03456 serine/threonine-protein phosphatase 2A regulatory subunit A (A)	Fasciclin-like arabinogalactan protein 10 OS=Arabidopsis thaliana GN=FLA10 PE=1 SV=1	Fasciclin domain
BnaA09T0522800WE	-0.0734678	0.331753	-0.656084	0.0274423	1.55021	0.0167643	--	--	Uncharacterized protein At3g61260 OS=Arabidopsis thaliana GN=At3g61260 PE=1 SV=1	Remorin, N-terminal region
BnaA09T0524900WE	0.181268	0.136148	0.302978	0.0428286	0.692734	0.0188425	GO:0009058	cystine lyase CORI3-like; K00815 tyrosine aminotransferase [EC:2.6.1.5] (A)	Probable aminotransferase TAT4 OS=Arabidopsis thaliana GN=At4g23590 PE=2 SV=1	Aminotransferase class I and II
BnaA09T0529100WE	-0.830764	0.111513	0.771957	0.0516075	1.74658	0.00674136	GO:0030145	uncharacterized LOC101250545; K11426 SET and MYND domain-containing protein (A)	Germin-like protein subfamily 2 member 4 OS=Arabidopsis thaliana GN=GLP10 PE=2 SV=1	Cupin
BnaA09T0532600WE	0.262432	0.0215492	0.373075	0.0347079	0.823017	0.0326694	--	ras-related protein Rab-3D-like; K07884 Ras-related protein Rab-3D (A)	Transmembrane protein 205 OS=Xenopus laevis GN=tmem205 PE=2 SV=1	Domain of unknown function (DUF4149)
BnaA09T0532800WE	0.473148	0.100339	0.107241	0.0399819	-0.776673	0.00232394	--	dnaJ homolog subfamily B member 11; K09517 DnaJ homolog subfamily B member 11 (A)	DnaJ protein ERDJ3B OS=Arabidopsis thaliana GN=ERDJ3B PE=1 SV=1	DnaJ C terminal domain
BnaA09T0533600WE	0.319262	0.00675322	0.309656	0.00317239	0.687747	0.0199803	GO:0000166	ABC transporter C family member 14-like; K05665 ATP-binding cassette, subfamily C (CFTR/MRP), member 1 (A)	ABC transporter C family member 14 OS=Arabidopsis thaliana GN=ABCC14 PE=1 SV=1	ABC transporter
BnaA09T0542900WE	0.672363	0.0137138	0.0747313	0.374823	-0.917267	0.00611148	GO:0055085	adenine nucleotide transporter BT1, chloroplastic/mitochondrial-like; K14684 solute carrier family 25 (mitochondrial phosphate transporter), member 23/24/25/41 (A)	Adenine nucleotide transporter BT1, chloroplastic/mitochondrial OS=Arabidopsis thaliana GN=BT1 PE=1 SV=1	Mitochondrial carrier protein
BnaA09T0544700WE	-0.294622	0.0843194	0.417646	0.0133153	0.698164	0.0207395	GO:0003676	CHD3-type chromatin-remodeling factor PICKLE; K11643 chromodomain-helicase-DNA-binding protein 4 [EC:3.6.4.12] (A)	CHD3-type chromatin-remodeling factor PICKLE OS=Arabidopsis thaliana GN=PKL PE=1 SV=1	PHD-finger
BnaA09T0545900WE	-0.0530034	0.294247	0.255119	0.164337	0.957695	0.00412071	--	cycloeucalenol cycloisomerase-like; K08246 cycloeucalenol cycloisomerase [EC:5.5.1.9] (A)	Cycloeucalenol cycloisomerase OS=Arabidopsis thaliana GN=CPI1 PE=2 SV=1	--
BnaA09T0549900WE	-0.400637	0.0317586	0.0331495	0.345602	0.67256	0.0335447	GO:0016021	transmembrane 9 superfamily member 10; K17086 transmembrane 9 superfamily member 2/4 (A)	Transmembrane 9 superfamily member 10 OS=Arabidopsis thaliana GN=TMN10 PE=2 SV=1	Endomembrane protein 70
BnaA09T0551500WE	0.179839	0.287255	-0.174139	0.0514375	-0.737675	0.016752	--	GMP synthase; K01951 GMP synthase (glutamine-hydrolysing) [EC:6.3.5.2] (A)	Putative glutamine amidotransferase-like protein C13C5.04 OS=Schizosaccharomyces pombe (strain 972 / ATCC 24843) GN=SPAC13C5.04 PE=3 SV=1	Glutamine amidotransferase class-I
BnaA09T0552700WE	-0.181183	0.292062	0.79737	0.0863527	1.57702	0.00447598	GO:0006629	geranylgeranyl diphosphate reductase, chloroplastic; K10960 geranylgeranyl reductase [EC:1.3.1.83] (A)	GDSL esterase/lipase At2g23540 OS=Arabidopsis thaliana GN=At2g23540 PE=2 SV=1	GDSL-like Lipase/Acylhydrolase
BnaA09T0555700WE	-0.00428644	0.343478	-0.201139	0.165209	-0.622319	0.0190889	GO:0004672	casein kinase II subunit alpha, chloroplastic; K03097 casein kinase II subunit alpha [EC:2.7.11.1] (A)	Casein kinase II subunit alpha, chloroplastic OS=Arabidopsis thaliana GN=At2g23070 PE=2 SV=1	Protein kinase domain
BnaA09T0560200WE	0.423366	0.0743616	0.11106	0.301201	1.46051	0.017098	GO:0004601	peroxidase 17-like; K00430 peroxidase [EC:1.11.1.7] (A)	Peroxidase 17 OS=Arabidopsis thaliana GN=PER17 PE=2 SV=1	Peroxidase
BnaA09T0564200WE	0.39698	0.0371603	0.0317767	0.370432	-0.712276	0.0022833	GO:0000049	phenylalanine--tRNA ligase alpha subunit, cytoplasmic-like; K01889 phenylalanyl-tRNA synthetase alpha chain [EC:6.1.1.20] (A)	Phenylalanine--tRNA ligase alpha subunit, cytoplasmic OS=Arabidopsis thaliana GN=At4g39280 PE=2 SV=3	tRNA synthetases class II core domain (F)
BnaA09T0569000WE	0.148217	0.341078	-0.753574	0.0490747	1.59618	0.0189601	GO:0005783	translocon-associated protein subunit alpha-like; K13249 translocon-associated protein subunit alpha (A)	Translocon-associated protein subunit alpha OS=Arabidopsis thaliana GN=At2g21160 PE=2 SV=3	Translocon-associated protein (TRAP), alpha subunit
BnaA09T0569400WE	-0.92767	0.0168129	0.211839	0.25613	1.37306	0.00675177	--	hypothetical protein; K01870 isoleucyl-tRNA synthetase [EC:6.1.1.5] (A)	Dirigent protein 23 OS=Arabidopsis thaliana GN=DIR23 PE=2 SV=1	Dirigent-like protein
BnaA09T0569900WE	0.0462091	0.26966	0.432338	0.00907023	0.930533	0.00742046	GO:0005515	DNA polymerase kappa; K03511 DNA polymerase kappa [EC:2.7.7.7] (A)	Synaptotagmin-1 OS=Arabidopsis thaliana GN=SYT1 PE=1 SV=2	C2 domain
BnaA09T0571700WE	0.442654	0.0539298	0.439171	0.0486024	0.68093	0.033719	GO:0003824	probable protein phosphatase 2C 58; K17506 protein phosphatase 1L [EC:3.1.3.16] (A)	Probable protein phosphatase 2C 58 OS=Arabidopsis thaliana GN=At4g28400 PE=2 SV=1	Protein phosphatase 2C
BnaA09T0571800WE	0.175761	0.177042	0.760145	0.00255314	0.681104	0.00182911	GO:0009058	tyrosine aminotransferase-like; K00815 tyrosine aminotransferase [EC:2.6.1.5] (A)	Tyrosine aminotransferase OS=Arabidopsis thaliana GN=TAT PE=2 SV=1	Aminotransferase class I and II
BnaA09T0581300WE	0.235349	0.0275119	-0.299853	0.0319113	-1.42431	0.00285125	GO:0003824	2-isopropylmalate synthase 1, chloroplastic-like; K01649 2-isopropylmalate synthase [EC:2.3.3.13] (A)	2-isopropylmalate synthase 1, chloroplastic OS=Arabidopsis thaliana GN=IPMS1 PE=1 SV=2	LeuA allosteric (dimerisation) domain
BnaA09T0582600WE	0.0951211	0.0354018	-0.293946	0.0015893	-0.592174	0.00187891	GO:0005515	guanine nucleotide-binding protein subunit beta-like protein; K14753 guanine nucleotide-binding protein subunit beta-2-like 1 protein (A)	Guanine nucleotide-binding protein subunit beta-like protein OS=Brassica napus GN=GB1 PE=2 SV=1	WD domain, G-beta repeat
BnaA09T0585400WE	-0.348713	0.261108	0.0664256	0.116425	0.632196	0.0106426	GO:0003676	oligouridylate-binding protein 1B; K13201 nucleolysin TIA-1/TIAR (A)	Oligouridylate-binding protein 1B OS=Arabidopsis thaliana GN=UBP1B PE=1 SV=1	RNA recognition motif. (a.k.a. RRM, RBD, or RNP domain)
BnaA09T0586500WE	-0.261163	0.233943	-0.364107	0.197963	-0.847398	0.0161976	GO:0005515	glutathione S-transferase U25-like; K00799 glutathione S-transferase [EC:2.5.1.18] (A)	Glutathione S-transferase U25 OS=Arabidopsis thaliana GN=GSTU25 PE=1 SV=1	Glutathione S-transferase, N-terminal domain
BnaA09T0591900WE	0.10617	0.032664	-0.0691491	0.307712	0.584788	0.0179532	GO:0003824	cinnamoyl-CoA reductase 1; K09753 cinnamoyl-CoA reductase [EC:1.2.1.44] (A)	Cinnamoyl-CoA reductase 1 OS=Arabidopsis thaliana GN=CCR1 PE=1 SV=1	NAD dependent epimerase/dehydratase family
BnaA09T0593300WE	-0.0153413	0.221508	0.162811	0.0293048	0.706125	0.0136655	GO:0005515	protein TOPLESS-like; K14963 COMPASS component SWD3 (A)	Protein TOPLESS OS=Arabidopsis thaliana GN=TPL PE=1 SV=1	WD domain, G-beta repeat
BnaA09T0597000WE	-0.290615	0.119133	0.893167	0.00570402	1.99294	0.0127288	GO:0004185	serine carboxypeptidase-like 50; K09645 vitellogenic carboxypeptidase-like protein [EC:3.4.16.-] (A)	Serine carboxypeptidase-like 50 OS=Arabidopsis thaliana GN=SCPL50 PE=2 SV=1	Serine carboxypeptidase
BnaA09T0606800WE	-0.125618	0.00912042	-0.169376	0.268147	-0.972757	0.00526216	GO:0016620	glyceraldehyde-3-phosphate dehydrogenase, cytosolic-like; K00134 glyceraldehyde 3-phosphate dehydrogenase [EC:1.2.1.12] (A)	Glyceraldehyde-3-phosphate dehydrogenase, cytosolic OS=Sinapis alba GN=GAPC PE=2 SV=2	Glyceraldehyde 3-phosphate dehydrogenase, NAD binding domain
BnaA09T0608500WE	-0.227122	0.0914016	-0.317147	0.0946286	-0.881324	0.0458854	--	protein SDA1 homolog; K14856 protein SDA1 (A)	Protein SDA1 homolog OS=Nematostella vectensis GN=sdad1 PE=3 SV=1	NUC130/3NT domain
BnaA09T0616600WE	0.0221198	0.296316	0.295801	0.0295033	0.653028	0.00533955	--	hypothetical protein; K14962 COMPASS component SWD2 (A)	Epidermis-specific secreted glycoprotein EP1 OS=Daucus carota GN=EP1 PE=1 SV=1	D-mannose binding lectin
BnaA09T0617400WE	-0.675359	0.00328367	0.194926	0.201984	0.556571	0.035709	GO:0004047	aminomethyltransferase, mitochondrial-like; K00605 aminomethyltransferase [EC:2.1.2.10] (A)	Aminomethyltransferase, mitochondrial OS=Arabidopsis thaliana GN=GDCST PE=2 SV=1	Glycine cleavage T-protein C-terminal barrel domain
BnaA09T0619600WE	-0.744856	0.0139438	-0.0665739	0.203222	4.22138	0.00706881	GO:0003676	nuclease PA3; K05986 nuclease S1 [EC:3.1.30.1] (A)	Endonuclease 1 OS=Arabidopsis thaliana GN=ENDO1 PE=1 SV=1	S1/P1 Nuclease
BnaA09T0621900WE	-1.11757	0.00860814	0.269349	0.101622	0.852699	0.0427733	GO:0016021	transmembrane 9 superfamily member 1-like; K17087 transmembrane 9 superfamily member 3 (A)	Transmembrane 9 superfamily member 1 OS=Arabidopsis thaliana GN=TMN1 PE=1 SV=1	Endomembrane protein 70
BnaA09T0625700WE	0.039415	0.324579	-0.378869	0.0877756	0.553172	0.0317887	GO:0004553	hypothetical protein; K01181 endo-1,4-beta-xylanase [EC:3.2.1.8] (A)	Endo-1,4-beta-xylanase A OS=Thermoanaerobacterium saccharolyticum GN=xynA PE=1 SV=1	Glycosyl hydrolase family 10
BnaA09T0628000WE	-0.0380902	0.107811	0.00143067	0.336977	-0.754265	0.0201601	GO:0000166	leucine--tRNA ligase, cytoplasmic-like; K01869 leucyl-tRNA synthetase [EC:6.1.1.4] (A)	Leucine--tRNA ligase, cytoplasmic OS=Arabidopsis thaliana GN=At1g09620 PE=1 SV=1	Anticodon-binding domain of tRNA
BnaA09T0644900WE	0.297002	0.187305	-0.881322	0.0821416	-0.64872	0.00287796	--	--	Protein FAM136A OS=Danio rerio GN=fam136a PE=2 SV=1	Eukaryotic protein of unknown function (DUF842)
BnaA09T0646900WE	-0.54268	0.0899858	-0.219087	0.0182626	0.669399	0.038866	GO:0004601	peroxidase 3-like; K00430 peroxidase [EC:1.11.1.7] (A)	Peroxidase 3 OS=Arabidopsis thaliana GN=PER3 PE=2 SV=1	Peroxidase
BnaA09T0651400WE	-0.0863147	0.141061	0.166891	0.33511	-1.6427	0.0159217	GO:0003993	Os03g0332500; K02866 large subunit ribosomal protein L10e (A)	Acid phosphatase 1 OS=Solanum lycopersicum GN=APS1 PE=2 SV=1	HAD superfamily, subfamily IIIB (Acid phosphatase)
BnaA09T0652500WE	2.96446	0.231543	0.265093	0.125371	-0.65995	0.00392851	GO:0016020	prohibitin-2, mitochondrial-like; K17081 prohibitin 2 (A)	Prohibitin-2, mitochondrial OS=Arabidopsis thaliana GN=PHB2 PE=1 SV=1	SPFH domain / Band 7 family
BnaA09T0653800WE	-0.11863	0.0837046	-0.450479	0.0668052	-1.50632	0.0241451	GO:0004109	coproporphyrinogen-III oxidase 1, chloroplastic-like; K00228 coproporphyrinogen III oxidase [EC:1.3.3.3] (A)	Coproporphyrinogen-III oxidase 1, chloroplastic OS=Arabidopsis thaliana GN=CPX1 PE=2 SV=1	Coproporphyrinogen III oxidase
BnaA09T0654400WE	-0.169182	0.25947	0.0573236	0.232461	0.868748	0.00728562	GO:0003824	methylcrotonoyl-CoA carboxylase subunit alpha, mitochondrial; K01968 3-methylcrotonyl-CoA carboxylase alpha subunit [EC:6.4.1.4] (A)	Methylcrotonoyl-CoA carboxylase subunit alpha, mitochondrial OS=Arabidopsis thaliana GN=MCCA PE=1 SV=2	Biotin-requiring enzyme
BnaA09T0656300WE	-2.43497	0.00822183	-0.438021	0.260362	-2.77021	0.0185706	GO:0005634	protein MRG2-like; K11339 mortality factor 4-like protein 1 (A)	Protein MRG2 OS=Arabidopsis thaliana GN=MRG2 PE=1 SV=1	RNA binding activity-knot of a chromodomain
BnaA09T0661000WE	-0.0795448	0.106245	0.400623	0.0381688	1.87598	0.00422079	GO:0000786	CENH3; histone H3-like centromeric protein HTR12; K11253 histone H3 (A)	Histone H3-like centromeric protein HTR12 OS=Arabidopsis thaliana GN=HTR12 PE=1 SV=3	Core histone H2A/H2B/H3/H4
BnaA09T0661800WE	0.115966	0.222533	-0.0568097	0.256144	0.718973	0.00666869	GO:0008152	GPAT4-C1; glycerol-3-phosphate 2-O-acyltransferase 4-like; K13508 glycerol-3-phosphate acyltransferase [EC:2.3.1.15] (A)	Glycerol-3-phosphate 2-O-acyltransferase 4 OS=Arabidopsis thaliana GN=GPAT4 PE=1 SV=1	Acyltransferase
BnaA09T0663800WE	0.340918	0.198663	-0.257615	0.0530925	-0.611748	0.00390417	GO:0003777	armadillo repeat-containing kinesin-like protein 2; K10396 kinesin family member 5 (A)	Armadillo repeat-containing kinesin-like protein 2 OS=Arabidopsis thaliana GN=ARK2 PE=1 SV=2	Armadillo/beta-catenin-like repeat
BnaA09T0663900WE	0.429232	0.100465	0.125832	0.140095	0.697057	0.00740334	GO:0005086	brefeldin A-inhibited guanine nucleotide-exchange protein 3; K18442 brefeldin A-inhibited guanine nucleotide-exchange protein (A)	Brefeldin A-inhibited guanine nucleotide-exchange protein 3 OS=Arabidopsis thaliana GN=BIG3 PE=1 SV=1	Domain of unknown function (DUF1981)
BnaA09T0665100WE	-0.0255976	0.356056	-1.26117	0.0170281	-1.31885	0.0048864	GO:0005634	protein mago nashi homolog; K12877 protein mago nashi (A)	Protein mago nashi homolog OS=Arabidopsis thaliana GN=At1g02140 PE=1 SV=1	Mago nashi protein
BnaA10T0001600WE	0.00885544	0.180817	0.00648921	0.250394	0.733475	0.0128011	--	protein kinase domain containing protein; K08857 NIMA (never in mitosis gene a)-related kinase [EC:2.7.11.1] (A)	Protein VASCULAR ASSOCIATED DEATH 1, chloroplastic OS=Arabidopsis thaliana GN=VAD1 PE=1 SV=1	GRAM domain
BnaA10T0004600WE	0.193683	0.0639003	0.156166	0.144284	0.524368	0.00874216	GO:0005215	aquaporin PIP1-3-like; K09872 aquaporin PIP (A)	Probable aquaporin PIP1-4 OS=Arabidopsis thaliana GN=PIP1.4 PE=1 SV=1	Major intrinsic protein
BnaA10T0005900WE	0.153614	0.143932	0.313178	0.0819446	0.514217	0.0225445	GO:0016616	hypothetical protein; K04496 C-terminal binding protein (A)	C-terminal binding protein AN OS=Arabidopsis thaliana GN=AN PE=1 SV=1	D-isomer specific 2-hydroxyacid dehydrogenase, NAD binding domain
BnaA10T0007400WE	-0.325324	0.0607129	0.392803	0.0172461	0.90944	0.0119057	GO:0004190	hypothetical protein; K01381 saccharopepsin [EC:3.4.23.25] (A)	Protein ASPARTIC PROTEASE IN GUARD CELL 1 OS=Arabidopsis thaliana GN=ASPG1 PE=1 SV=1	Xylanase inhibitor N-terminal
BnaA10T0008900WE	0.39004	0.0109358	-0.618327	0.0126465	-0.688072	0.0359964	GO:0003735	60S acidic ribosomal protein P1-3; K02942 large subunit ribosomal protein LP1 (A)	60S acidic ribosomal protein P1-3 OS=Arabidopsis thaliana GN=RPP1C PE=1 SV=2	60s Acidic ribosomal protein
BnaA10T0011800WE	-0.380294	0.26468	0.88718	0.00679131	1.0203	0.00410847	GO:0030145	uncharacterized LOC101250545; K11426 SET and MYND domain-containing protein (A)	Germin-like protein subfamily 2 member 2 OS=Arabidopsis thaliana GN=At1g02335 PE=2 SV=1	Cupin
BnaA10T0016400WE	-0.143459	0.329711	-0.244426	0.301821	1.75437	0.0121193	--	--	Protein RALF-like 1 OS=Arabidopsis thaliana GN=RALF1 PE=1 SV=1	Rapid ALkalinization Factor (RALF)
BnaA10T0016800WE	0.0412164	0.290667	0.475282	0.0158424	1.97805	0.0128508	GO:0005515	glutathione S-transferase F4; K00799 glutathione S-transferase [EC:2.5.1.18] (A)	Glutathione S-transferase F4 OS=Arabidopsis thaliana GN=GSTF4 PE=2 SV=1	Glutathione S-transferase, C-terminal domain
BnaA10T0023700WE	-0.15295	0.25096	-0.469446	0.0202336	0.759089	0.0255354	--	fasciclin-like arabinogalactan protein 4; K19519 transforming growth factor-beta-induced protein (A)	Fasciclin-like arabinogalactan protein 9 OS=Arabidopsis thaliana GN=FLA9 PE=1 SV=1	Fasciclin domain
BnaA10T0027700WE	-0.0398238	0.371067	-0.203427	0.0143297	-0.505629	0.00332832	GO:0006108	malate dehydrogenase, cytoplasmic 1-like; K00025 malate dehydrogenase [EC:1.1.1.37] (A)	Malate dehydrogenase, cytoplasmic 1 OS=Arabidopsis thaliana GN=MDH1 PE=1 SV=2	lactate/malate dehydrogenase, NAD binding domain
BnaA10T0032400WE	0.674617	0.259434	0.638431	0.13248	0.864721	0.0129773	GO:0005634	transcription initiation factor TFIID subunit 6; K03131 transcription initiation factor TFIID subunit 6 (A)	Transcription initiation factor TFIID subunit 6 OS=Arabidopsis thaliana GN=TAF6 PE=1 SV=1	TAF6 C-terminal HEAT repeat domain
BnaA10T0032700WE	-0.701834	0.00292706	0.299159	0.170106	0.619682	0.0166032	GO:0008289	putative BPI/LBP family protein At1g04970; K05399 lipopolysaccharide-binding protein (A)	Putative BPI/LBP family protein At1g04970 OS=Arabidopsis thaliana GN=At1g04970 PE=2 SV=1	LBP / BPI / CETP family, C-terminal domain
BnaA10T0035500WE	-1.90488	0.0636336	-0.666458	0.164759	1.20171	0.0207249	GO:0004601	peroxidase 2-like; K00430 peroxidase [EC:1.11.1.7] (A)	Peroxidase 2 OS=Arabidopsis thaliana GN=PER2 PE=2 SV=1	Peroxidase
BnaA10T0035700WE	-0.243267	0.0829784	-0.185287	0.297751	0.83929	0.0255056	GO:0004601	peroxidase 3-like; K00430 peroxidase [EC:1.11.1.7] (A)	Peroxidase 3 OS=Arabidopsis thaliana GN=PER3 PE=2 SV=1	Peroxidase
BnaA10T0039500WE	-0.602143	0.0103912	0.411271	0.0559246	0.754362	0.00748904	GO:0005515	hypothetical protein; K19938 rabphilin-3A (A)	Synaptotagmin-5 OS=Arabidopsis thaliana GN=SYT5 PE=2 SV=1	C2 domain
BnaA10T0042400WE	-0.352746	0.359693	-0.445063	0.102553	0.597398	0.019712	GO:0004568	endochitinase CH25; K01183 chitinase [EC:3.2.1.14] (A)	Chitinase-like protein 1 OS=Arabidopsis thaliana GN=CTL1 PE=1 SV=1	Chitinase class I
BnaA10T0049500WE	-0.31552	0.0571424	0.223325	0.24415	1.33653	0.0294087	GO:0000786	histone H1.1-like; K11275 histone H1/5 (A)	Histone H1.2 OS=Arabidopsis thaliana GN=At2g30620 PE=1 SV=1	linker histone H1 and H5 family
BnaA10T0050600WE	-0.185433	0.363233	0.418446	0.0111426	1.30761	0.0140479	GO:0004672	hypothetical protein; K04730 interleukin-1 receptor-associated kinase 1 [EC:2.7.11.1] (A)	Probable LRR receptor-like serine/threonine-protein kinase At1g06840 OS=Arabidopsis thaliana GN=At1g06840 PE=2 SV=2	Leucine rich repeat N-terminal domain
BnaA10T0052600WE	0.788499	0.128927	-0.121644	0.199842	-1.0452	0.0449649	GO:0046907	ran-binding protein 1 homolog a; K15306 Ran-binding protein 1 (A)	Ran-binding protein 1 homolog a OS=Arabidopsis thaliana GN=RANBP1A PE=1 SV=1	RanBP1 domain
BnaA10T0057700WE	0.165535	0.366464	-0.193509	0.210789	-1.57678	0.00971862	GO:0005524	hexokinase-like 1 protein; K00844 hexokinase [EC:2.7.1.1] (A)	Hexokinase-like 1 protein OS=Arabidopsis thaliana GN=At1g47840 PE=2 SV=2	Hexokinase
BnaA10T0058900WE	0.135671	0.155093	0.43861	0.0347838	0.565591	0.0293647	--	exocyst complex component SEC3A; K19983 exocyst complex component 1 (A)	Exocyst complex component SEC3A OS=Arabidopsis thaliana GN=SEC3A PE=1 SV=1	Exocyst complex component SEC3 N-terminal PIP2 binding PH
BnaA10T0060600WE	-0.18831	0.32022	-0.732376	0.0203819	0.764495	0.00830635	--	RAN GTPase-activating protein 1-like; K14319 Ran GTPase-activating protein 1 (A)	WPP domain-containing protein 2 OS=Arabidopsis thaliana GN=WPP2 PE=1 SV=1	WPP domain
BnaA10T0060800WE	-0.238894	0.0320743	0.333231	0.108437	2.43661	0.0118635	GO:0006508	hypothetical protein; K16292 KDEL-tailed cysteine endopeptidase [EC:3.4.22.-] (A)	Cysteine proteinase RD21a OS=Arabidopsis thaliana GN=RD21A PE=1 SV=1	Granulin
BnaA10T0063300WE	0.0677594	0.319413	0.637941	0.110516	1.35678	0.00656889	GO:0004806	DEHA2E21164p; K01046 triacylglycerol lipase [EC:3.1.1.3] (A)	Lipase OS=Thermomyces lanuginosus GN=LIP PE=1 SV=1	Lipase (class 3)
BnaA10T0064400WE	0.577623	0.0868953	0.348868	0.0534348	0.861177	0.00317672	GO:0005515	pre-mRNA-processing protein 40A; K12821 pre-mRNA-processing factor 40 (A)	Pre-mRNA-processing protein 40A OS=Arabidopsis thaliana GN=PRP40A PE=1 SV=1	WW domain
BnaA10T0070900WE	0.309775	0.0560798	-0.00519829	0.38818	0.756054	0.00371313	--	manganese-dependent ADP-ribose/CDP-alcohol diphosphatase; K01517 manganese-dependent ADP-ribose/CDP-alcohol diphosphatase [EC:3.6.1.13 3.6.1.16 3.6.1.53] (A)	High-affinity nitrate transporter 3.1 OS=Arabidopsis thaliana GN=NRT3.1 PE=1 SV=1	--
BnaA10T0072200WE	-0.18847	0.254016	-0.23711	0.0939663	0.600668	0.00784499	--	exocyst complex component EXO84B; K19986 exocyst complex component 8 (A)	Exocyst complex component EXO84B OS=Arabidopsis thaliana GN=EXO84B PE=1 SV=1	Vps51/Vps67
BnaA10T0072300WE	-0.370778	0.0342217	0.120893	0.041429	1.14086	0.00164551	GO:0004672	POPTRDRAFT_756677; hypothetical protein; K04730 interleukin-1 receptor-associated kinase 1 [EC:2.7.11.1] (A)	Probable leucine-rich repeat receptor-like protein kinase At5g49770 OS=Arabidopsis thaliana GN=At5g49770 PE=2 SV=1	Leucine rich repeat N-terminal domain
BnaA10T0072500WE	-0.349628	0.0195381	0.35565	0.0573394	0.514778	0.00422771	GO:0004553	endoglucanase 25-like; K08472 mlo protein (A)	Endoglucanase 25 OS=Arabidopsis thaliana GN=KOR PE=1 SV=1	Glycosyl hydrolase family 9
BnaA10T0079000WE	-0.216975	0.325906	0.613796	0.0408463	2.0837	0.0136307	GO:0008152	short-chain dehydrogenase/reductase family protein; K11165 dehydrogenase/reductase SDR family member 7 [EC:1.1.-.-] (A)	11-beta-hydroxysteroid dehydrogenase-like 4B OS=Arabidopsis thaliana GN=HSD7 PE=2 SV=2	short chain dehydrogenase
BnaA10T0084800WE	0.97103	0.0152485	-0.483258	0.139716	-1.11914	0.0252617	GO:0003735	hypothetical protein; K02969 small subunit ribosomal protein S20e (A)	40S ribosomal protein S20-1 OS=Arabidopsis thaliana GN=RPS20A PE=2 SV=2	Ribosomal protein S10p/S20e
BnaA10T0085000WE	-0.286941	0.288292	-0.608925	0.0888391	0.718889	0.0369288	--	--	AT-hook motif nuclear-localized protein 4 OS=Arabidopsis thaliana GN=AHL4 PE=1 SV=1	Domain of unknown function (DUF296)
BnaA10T0090300WE	0.0247229	0.162678	-0.304113	0.0232504	-0.652855	0.00285822	--	40S ribosomal protein S10-3-like; K02947 small subunit ribosomal protein S10e (A)	40S ribosomal protein S10-1 OS=Arabidopsis thaliana GN=RPS10A PE=2 SV=1	Plectin/S10 domain
BnaA10T0103800WE	-0.0857307	0.0458823	-0.307023	0.0197984	0.766453	0.0142867	GO:0010181	NAD(P)H dehydrogenase (quinone) FQR1-like; K03809 NAD(P)H dehydrogenase (quinone) [EC:1.6.5.2] (A)	NAD(P)H dehydrogenase (quinone) FQR1 OS=Arabidopsis thaliana GN=FQR1 PE=1 SV=1	NADPH-dependent FMN reductase
BnaA10T0106700WE	0.423247	0.0339295	-0.480849	0.0198331	-0.87095	0.00854398	GO:0004834	tryptophan synthase beta chain 1, chloroplastic; K01696 tryptophan synthase beta chain [EC:4.2.1.20] (A)	Tryptophan synthase beta chain 1, chloroplastic OS=Arabidopsis thaliana GN=TSB1 PE=2 SV=1	Pyridoxal-phosphate dependent enzyme
BnaA10T0108900WE	-0.175151	0.0951873	-0.629925	0.0504927	0.521474	0.0100593	GO:0003735	--	--	Ribosomal protein L31
BnaA10T0109700WE	-0.120912	0.273037	-1.01147	0.0125787	-0.688751	0.00141342	GO:0000774	grpE protein homolog, mitochondrial; K03687 molecular chaperone GrpE (A)	Protein GrpE OS=Rhodopseudomonas palustris (strain TIE-1) GN=grpE PE=3 SV=1	GrpE
BnaA10T0111100WE	-0.393551	0.0580774	-0.165094	0.212569	1.21076	0.0219638	GO:0006071	POPTRDRAFT_753230; glycerophosphoryl diester phosphodiesterase family protein; K01126 glycerophosphoryl diester phosphodiesterase [EC:3.1.4.46] (A)	Glycerophosphodiester phosphodiesterase GDPDL4 OS=Arabidopsis thaliana GN=GDPDL4 PE=1 SV=1	Glycerophosphoryl diester phosphodiesterase family
BnaA10T0114200WE	0.12934	0.0856714	0.416595	0.0152629	0.997465	0.0153847	--	glutamic acid-rich protein-like; K17046 protein DEK (A)	Protein DEK OS=Homo sapiens GN=DEK PE=1 SV=1	DEK C terminal domain
BnaA10T0114400WE	-0.304522	0.116245	-0.265903	0.143903	0.711287	0.00191741	--	serine/threonine-protein phosphatase 2A 65 kDa regulatory subunit A beta isoform-like; K03456 serine/threonine-protein phosphatase 2A regulatory subunit A (A)	Fasciclin-like arabinogalactan protein 1 OS=Arabidopsis thaliana GN=FLA1 PE=1 SV=1	Fasciclin domain
BnaA10T0115500WE	0.68571	0.0223136	-0.362911	0.0226747	-0.547354	0.00548028	--	Metallo-dependent hydrolase; K01487 guanine deaminase [EC:3.5.4.3] (A)	ER membrane protein complex subunit 8/9 homolog OS=Arabidopsis thaliana GN=EMB2731 PE=2 SV=1	Uncharacterised protein family (UPF0172)
BnaA10T0115800WE	-0.205019	0.187691	0.810117	0.00464181	2.30778	0.00721261	--	--	Transmembrane protein 245 OS=Rattus norvegicus GN=Tmem245 PE=3 SV=1	--
BnaA10T0120000WE	0.116402	0.307825	-0.235362	0.261526	-0.822625	0.0294218	GO:0000287	probable pyruvate kinase, cytosolic isozyme; K00873 pyruvate kinase [EC:2.7.1.40] (A)	Probable pyruvate kinase, cytosolic isozyme OS=Arabidopsis thaliana GN=At4g26390 PE=3 SV=1	Pyruvate kinase, alpha/beta domain
BnaA10T0121900WE	0.962134	0.0555792	0.59421	0.00935053	1.50341	0.00682458	GO:0004553	hypothetical protein; K19891 glucan endo-1,3-beta-glucosidase 1/2/3 [EC:3.2.1.39] (A)	Glucan endo-1,3-beta-glucosidase 13 OS=Arabidopsis thaliana GN=At5g56590 PE=1 SV=1	X8 domain
BnaA10T0124700WE	-0.0343553	0.361623	-0.602798	0.00304389	-0.623255	0.00979046	GO:0005634	nucleosome assembly protein 1;3; K11279 nucleosome assembly protein 1-like 1 (A)	Nucleosome assembly protein 1;3 OS=Arabidopsis thaliana GN=NAP1;3 PE=1 SV=1	Nucleosome assembly protein (NAP)
BnaA10T0126300WE	-0.221552	0.136058	0.326052	0.00456395	1.54588	0.0102883	GO:0000166	calcium-transporting ATPase 8, plasma membrane-type-like; K01537 Ca2+-transporting ATPase [EC:3.6.3.8] (A)	Calcium-transporting ATPase 8, plasma membrane-type OS=Arabidopsis thaliana GN=ACA8 PE=1 SV=1	Cation transporter/ATPase, N-terminus
BnaA10T0130500WE	-0.114548	0.19833	0.375241	0.176775	0.550494	0.0398472	--	--	Calmodulin-binding protein 60 B OS=Arabidopsis thaliana GN=CBP60B PE=2 SV=1	Calmodulin binding protein-like
BnaA10T0143800WE	-0.0982072	0.310742	-0.680867	0.027888	0.707811	0.0130325	--	--	--	--
BnaA10T0150100WE	0.773913	0.0388808	-0.551569	0.0747936	-1.73539	0.00630061	GO:0003779	actin-depolymerizing factor 3-like; K05765 cofilin (A)	Actin-depolymerizing factor 3 OS=Arabidopsis thaliana GN=ADF3 PE=1 SV=1	Cofilin/tropomyosin-type actin-binding protein
BnaA10T0153400WE	0.877791	0.00419655	-0.58171	0.12022	2.277	0.0104166	GO:0006508	thiol protease aleurain; K01366 cathepsin H [EC:3.4.22.16] (A)	Thiol protease aleurain OS=Arabidopsis thaliana GN=ALEU PE=1 SV=2	Cathepsin propeptide inhibitor domain (I29)
BnaA10T0154500WE	-1.22164	0.0937974	0.0681641	0.200631	-0.653936	0.0445649	--	--	--	Root cap
BnaA10T0159400WE	0.261313	0.0813526	0.455434	0.00776361	0.918935	0.0176211	--	glucomannan 4-beta-mannosyltransferase 2-like; K13680 beta-mannan synthase [EC:2.4.1.32] (A)	Glucomannan 4-beta-mannosyltransferase 2 OS=Arabidopsis thaliana GN=CSLA2 PE=2 SV=1	Glycosyltransferase like family 2
BnaA10T0159800WE	0.22406	0.0795915	-0.216464	0.139701	-0.666732	0.000487524	--	--	Uncharacterized protein At5g22580 OS=Arabidopsis thaliana GN=At5g22580 PE=1 SV=1	Stress responsive A/B Barrel Domain
BnaA10T0165900WE	-0.455933	0.0129485	1.08139	0.00988421	1.1602	0.00449159	GO:0005507	BcAAO; L-ascorbate oxidase; K00423 L-ascorbate oxidase [EC:1.10.3.3] (A)	L-ascorbate oxidase OS=Cucumis sativus PE=1 SV=1	Multicopper oxidase
BnaA10T0166900WE	0.0360606	0.234646	0.290012	0.0460192	1.09152	0.00763092	GO:0003824	BrAO2; indole-3-acetaldehyde oxidase; K11817 indole-3-acetaldehyde oxidase [EC:1.2.3.7] (A)	Indole-3-acetaldehyde oxidase OS=Arabidopsis thaliana GN=AAO1 PE=1 SV=2	2Fe-2S iron-sulfur cluster binding domain
BnaA10T0167800WE	-0.196857	0.0394452	-0.194294	0.379393	-1.36502	0.038214	GO:0005985	sucrose synthase 1-like; K00695 sucrose synthase [EC:2.4.1.13] (A)	Sucrose synthase 1 OS=Arabidopsis thaliana GN=SUS1 PE=1 SV=3	Glycosyl transferases group 1
BnaA10T0169000WE	-0.0626065	0.147435	0.61339	0.005629	0.946249	0.0131623	GO:0005375	copper transporter 5; K14686 solute carrier family 31 (copper transporter), member 1 (A)	Copper transporter 5 OS=Arabidopsis thaliana GN=COPT5 PE=1 SV=1	Ctr copper transporter family
BnaA10T0170800WE	0.306327	0.217708	-0.239259	0.170071	-0.676686	0.0079006	GO:0016491	Flavonol synthase; K05278 flavonol synthase [EC:1.14.11.23] (A)	Codeine O-demethylase OS=Papaver somniferum GN=CODM PE=1 SV=1	non-haem dioxygenase in morphine synthesis N-terminal
BnaA10T0171700WE	0.0443921	0.364338	0.165683	0.229203	0.835617	0.00783343	GO:0009058	sucrose-phosphate synthase 1; K00696 sucrose-phosphate synthase [EC:2.4.1.14] (A)	Sucrose-phosphate synthase 1 OS=Arabidopsis thaliana GN=SPS1 PE=1 SV=1	Glycosyl transferase 4-like domain
BnaA10T0174700WE	-0.171943	0.137292	-0.502236	0.0510036	-0.610629	0.00192364	GO:0055085	mitochondrial dicarboxylate/tricarboxylate transporter DTC-like; K15104 solute carrier family 25 (mitochondrial oxoglutarate transporter), member 11 (A)	Mitochondrial dicarboxylate/tricarboxylate transporter DTC OS=Arabidopsis thaliana GN=DTC PE=1 SV=1	Mitochondrial carrier protein
BnaA10T0176200WE	0.0110618	0.31812	-0.295638	0.244822	-1.13237	0.0242921	GO:0006520	aspartate aminotransferase, cytoplasmic isozyme 1-like; K14454 aspartate aminotransferase, cytoplasmic [EC:2.6.1.1] (A)	Aspartate aminotransferase, cytoplasmic isozyme 1 OS=Arabidopsis thaliana GN=ASP2 PE=1 SV=2	Aminotransferase class I and II
BnaA10T0176400WE	0.136887	0.198836	-0.553514	0.0141662	-0.589338	0.00600339	GO:0003746	elongation factor 1-beta 2; K03232 elongation factor 1-beta (A)	Elongation factor 1-beta 1 OS=Arabidopsis thaliana GN=At5g12110 PE=2 SV=2	EF-1 guanine nucleotide exchange domain
BnaA10T0179900WE	-0.0791866	0.211455	-0.559531	0.0281769	0.77872	0.0311196	--	--	UPF0613 protein PB24D3.06c OS=Schizosaccharomyces pombe (strain 972 / ATCC 24843) GN=SPAPB24D3.06c PE=3 SV=1	Protein of unknown function (DUF1749)
BnaA10T0180800WE	0.0425767	0.32381	0.413187	0.0225928	1.47282	0.0145313	--	--	--	AWPM-19-like family
BnaA10T0181000WE	0.249045	0.33825	0.0376017	0.365779	-0.635241	0.0439991	--	putative MO25-like protein At5g47540; K08272 calcium binding protein 39 (A)	Putative MO25-like protein At5g47540 OS=Arabidopsis thaliana GN=At5g47540 PE=2 SV=1	Mo25-like
BnaA10T0185900WE	0.365276	0.0156791	0.181617	0.284548	-0.861583	0.00302739	GO:0006520	glutamate dehydrogenase 1; K00261 glutamate dehydrogenase (NAD(P)+) [EC:1.4.1.3] (A)	Glutamate dehydrogenase 1 OS=Arabidopsis thaliana GN=GDH1 PE=2 SV=1	Glu/Leu/Phe/Val dehydrogenase, dimerisation domain
BnaA10T0186400WE	0.214536	0.22601	-0.0327135	0.114862	-0.73536	0.00524532	GO:0003723	hypothetical protein; K03259 translation initiation factor 4E (A)	Eukaryotic translation initiation factor NCBP OS=Arabidopsis thaliana GN=NCBP PE=2 SV=1	Eukaryotic initiation factor 4E
BnaA10T0188300WE	-0.109319	0.236745	-0.662049	0.127065	-0.725235	0.0133247	GO:0016491	NADH--cytochrome b5 reductase 1; K00326 cytochrome-b5 reductase [EC:1.6.2.2] (A)	NADH--cytochrome b5 reductase 1 OS=Arabidopsis thaliana GN=CBR1 PE=1 SV=1	Oxidoreductase NAD-binding domain
BnaA10T0195300WE	-0.319446	0.0976725	-0.0167329	0.135777	0.88424	0.0168084	--	SART-1 family protein DOT2-like; K11984 U4/U6.U5 tri-snRNP-associated protein 1 (A)	SART-1 family protein DOT2 OS=Arabidopsis thaliana GN=DOT2 PE=1 SV=1	SART-1 family
BnaA10T0195600WE	0.186059	0.0300892	-0.217333	0.144005	-0.675545	0.00313354	GO:0005515	transducin beta-like protein 3; K14555 U3 small nucleolar RNA-associated protein 13 (A)	Transducin beta-like protein 3 OS=Bos taurus GN=TBL3 PE=2 SV=1	Utp13 specific WD40 associated domain
BnaA10T0199200WE	-0.529105	0.0447621	0.0161627	0.366356	0.510355	0.00486046	GO:0006631	acyl-[acyl-carrier-protein] desaturase 3, chloroplastic; K03921 acyl-[acyl-carrier-protein] desaturase [EC:1.14.19.2 1.14.19.11 1.14.19.26] (A)	Acyl-[acyl-carrier-protein] desaturase 3, chloroplastic OS=Arabidopsis thaliana GN=S-ACP-DES3 PE=1 SV=3	Fatty acid desaturase
BnaA10T0200000WE	0.24473	0.0961104	-0.343466	0.0697973	-1.27103	0.00982924	GO:0003735	40S ribosomal protein S7-3; K02993 small subunit ribosomal protein S7e (A)	40S ribosomal protein S7-3 OS=Arabidopsis thaliana GN=RPS7C PE=1 SV=2	Ribosomal protein S7e
BnaA10T0200600WE	-0.362403	0.0797468	-0.022184	0.367163	-0.620525	0.00541144	GO:0005524	T-complex protein 1 subunit zeta; K09498 T-complex protein 1 subunit zeta (A)	T-complex protein 1 subunit zeta 2 OS=Arabidopsis thaliana GN=CCT6B PE=1 SV=1	TCP-1/cpn60 chaperonin family
BnaA10T0204100WE	0.178131	0.354156	0.0113936	0.105441	-1.0798	0.0116442	--	--	Protein LONGIFOLIA 1 OS=Arabidopsis thaliana GN=LNG1 PE=1 SV=1	Domain of unknown function (DUF4378)
BnaA10T0212500WE	1.30334	0.0807922	-0.341415	0.0637226	-0.61832	0.0137742	--	hypothetical protein; K11984 U4/U6.U5 tri-snRNP-associated protein 1 (A)	Viral IAP-associated factor homolog OS=Drosophila melanogaster GN=viaf PE=1 SV=1	Phosducin
BnaA10T0213000WE	0.194898	0.198243	0.536833	0.0614667	0.650212	0.018961	GO:0005515	SWI/SNF complex component SNF12 homolog; K11650 SWI/SNF-related matrix-associated actin-dependent regulator of chromatin subfamily D (A)	SWI/SNF complex component SNF12 homolog OS=Arabidopsis thaliana GN=At5g14170 PE=1 SV=1	SWIB/MDM2 domain
BnaA10T0213200WE	0.0572517	0.310754	0.519493	0.0987628	1.39518	0.00128831	--	hypothetical protein; K14794 ribosomal RNA-processing protein 12 (A)	Protein NUCLEAR FUSION DEFECTIVE 4 OS=Arabidopsis thaliana GN=NFD4 PE=3 SV=1	Nodulin-like
BnaA10T0213900WE	0.0621727	0.210035	-0.251019	0.0664024	0.830661	0.00453492	--	mitochondrial phosphate carrier protein 3, mitochondrial-like; K15102 solute carrier family 25 (mitochondrial phosphate transporter), member 3 (A)	Mitochondrial phosphate carrier protein 3, mitochondrial OS=Arabidopsis thaliana GN=MPT3 PE=2 SV=1	Mitochondrial carrier protein
BnaA10T0218300WE	-0.00785189	0.299479	-0.300897	0.0818681	-0.848779	0.0109494	GO:0005975	transaldolase-like; K00616 transaldolase [EC:2.2.1.2] (A)	Transaldolase OS=Frankia alni (strain ACN14a) GN=tal PE=3 SV=1	Transaldolase
BnaA10T0221100WE	-0.179955	0.0416982	-0.0882949	0.0587353	0.692912	0.0103371	--	Crumbs complex protein; MAGUK homolog; cell polarity protein; serine/threonine kinase; K06103 calcium/calmodulin-dependent serine protein kinase [EC:2.7.11.1] (A)	UPF0061 protein AZOSEA38000 OS=Aromatoleum aromaticum (strain EbN1) GN=AZOSEA38000 PE=3 SV=1	Uncharacterized ACR, YdiU/UPF0061 family
BnaA10T0222700WE	-0.0359639	0.0949139	0.918049	0.339558	1.08933	0.0200928	GO:0004672	CPK7.1; calcium-dependent protein kinase 7-like; K13412 calcium-dependent protein kinase [EC:2.7.11.1] (A)	Calcium-dependent protein kinase 7 OS=Arabidopsis thaliana GN=CPK7 PE=2 SV=1	EF-hand domain pair
BnaA10T0234500WE	-1.55036	0.0234192	-0.246973	0.252083	0.52999	0.0218618	GO:0005515	WD and tetratricopeptide repeats protein 1-like; K11807 WD and tetratricopeptide repeats protein 1 (A)	WD and tetratricopeptide repeats protein 1 OS=Mus musculus GN=Wdtc1 PE=1 SV=1	WD domain, G-beta repeat
BnaA10T0238900WE	0.31882	0.164289	-0.635208	0.0587934	0.675239	0.0232883	GO:0004672	cyclin-dependent kinase C-1; K08819 cyclin-dependent kinase 12/13 [EC:2.7.11.22 2.7.11.23] (A)	Cyclin-dependent kinase C-1 OS=Arabidopsis thaliana GN=CDKC-1 PE=1 SV=1	Protein kinase domain
BnaA10T0243300WE	-0.0663753	0.378888	-0.623734	0.0104984	-0.552204	0.00431426	GO:0000287	soluble inorganic pyrophosphatase 1, chloroplastic-like; K01507 inorganic pyrophosphatase [EC:3.6.1.1] (A)	Soluble inorganic pyrophosphatase 6, chloroplastic OS=Arabidopsis thaliana GN=PPA6 PE=1 SV=1	Inorganic pyrophosphatase
BnaA10T0247200WE	-0.202173	0.0562456	-0.0934759	0.232911	0.632008	0.00869288	GO:0004672	serine/threonine-protein kinase SRK2G; K14498 serine/threonine-protein kinase SRK2 [EC:2.7.11.1] (A)	Serine/threonine-protein kinase SRK2G OS=Arabidopsis thaliana GN=SRK2G PE=1 SV=2	Protein kinase domain
BnaA10T0249800WE	0.725852	0.255874	0.284808	0.11981	0.870545	0.0128825	GO:0004185	serine carboxypeptidase-like 35; K16297 serine carboxypeptidase-like clade II [EC:3.4.16.-] (A)	Serine carboxypeptidase-like 35 OS=Arabidopsis thaliana GN=SCPL35 PE=2 SV=1	Serine carboxypeptidase
BnaA10T0251100WE	-0.125035	0.161764	-0.141446	0.222096	1.04936	0.0226342	GO:0003676	uncharacterized ATP-dependent helicase YprA-like; K06877 DEAD/DEAH box helicase domain-containing protein (A)	Isoaspartyl peptidase/L-asparaginase 1 OS=Arabidopsis thaliana GN=At5g08100 PE=1 SV=2	DEAD/DEAH box helicase
BnaA10T0251200WE	-0.171458	0.19513	-0.54755	0.0250438	1.60857	0.0124293	GO:0016787	isoaspartyl peptidase/L-asparaginase 1; K13051 beta-aspartyl-peptidase (threonine type) [EC:3.4.19.5] (A)	Isoaspartyl peptidase/L-asparaginase 1 OS=Arabidopsis thaliana GN=At5g08100 PE=1 SV=2	Asparaginase
BnaA10T0252100WE	-0.234644	0.100828	0.289919	0.0337923	1.26624	0.017155	GO:0016020	heparanase-like protein 1; K07964 heparanase 1 [EC:3.2.1.166] (A)	Heparanase-like protein 1 OS=Arabidopsis thaliana GN=At5g07830 PE=2 SV=1	Glycosyl hydrolase family 79, N-terminal domain
BnaA10T0252900WE	0.0743837	0.296278	0.204944	0.316497	0.977982	0.0201461	--	--	--	Plant family of unknown function (DUF810)
BnaA10T0253500WE	0.00821514	0.157755	0.451867	0.000823972	1.13401	0.00567622	GO:0004190	hypothetical protein; K01381 saccharopepsin [EC:3.4.23.25] (A)	Aspartic proteinase nepenthesin-1 OS=Nepenthes gracilis GN=nep1 PE=1 SV=1	Xylanase inhibitor C-terminal
BnaA10T0262000WE	-0.63895	0.132777	0.575485	0.261572	0.754696	0.0270725	GO:0003824	D-lactate dehydrogenase [cytochrome], mitochondrial; K00102 D-lactate dehydrogenase (cytochrome) [EC:1.1.2.4] (A)	D-lactate dehydrogenase [cytochrome], mitochondrial OS=Arabidopsis thaliana GN=DLD PE=1 SV=1	FAD binding domain
BnaA10T0264500WE	-0.6927	0.00935618	0.331965	0.0342718	0.698226	0.0325939	GO:0005509	hypothetical protein; K12587 exosome complex component MTR3 (A)	TLD domain-containing protein 1 OS=Mus musculus GN=Tldc1 PE=2 SV=1	TLD
BnaA10T0267000WE	0.158616	0.0581891	0.250405	0.0269146	0.655965	0.0158665	GO:0008152	hypothetical protein; K13493 cytokinin-N-glucosyltransferase [EC:2.4.1.-] (A)	UDP-glycosyltransferase 76C4 OS=Arabidopsis thaliana GN=UGT76C4 PE=2 SV=1	UDP-glucoronosyl and UDP-glucosyl transferase
BnaA10T0268200WE	0.348911	0.0983193	-0.239091	0.15242	-1.18831	0.00680886	GO:0005515	26S proteasome non-ATPase regulatory subunit 7 homolog A; K03038 26S proteasome regulatory subunit N8 (A)	26S proteasome non-ATPase regulatory subunit 7 homolog A OS=Arabidopsis thaliana GN=RPN8A PE=1 SV=1	JAB1/Mov34/MPN/PAD-1 ubiquitin protease
BnaA10T0272400WE	0.0597509	0.376126	0.285652	0.0803946	1.32699	0.00167569	GO:0004672	putative inactive receptor-like protein kinase At1g64210; K04733 interleukin-1 receptor-associated kinase 4 [EC:2.7.11.1] (A)	Probable leucine-rich repeat receptor-like protein kinase At5g05160 OS=Arabidopsis thaliana GN=At5g05160 PE=2 SV=1	Leucine rich repeat N-terminal domain
BnaA10T0276300WE	0.226079	0.0832478	0.205393	0.0346455	-0.70122	0.00157403	GO:0016491	sulfite reductase [ferredoxin], chloroplastic; K00392 sulfite reductase (ferredoxin) [EC:1.8.7.1] (A)	Sulfite reductase [ferredoxin], chloroplastic OS=Arabidopsis thaliana GN=SIR PE=1 SV=1	Nitrite/Sulfite reductase ferredoxin-like half domain
BnaA10T0285600WE	0.110787	0.105437	0.486657	0.0223731	0.915796	0.000869981	GO:0005215	ethylene-insensitive protein 2-like; K14513 ethylene-insensitive protein 2 (A)	Ethylene-insensitive protein 2 OS=Arabidopsis thaliana GN=EIN2 PE=1 SV=1	Natural resistance-associated macrophage protein
BnaA10T0288200WE	0.252115	0.32379	-0.646677	0.0463661	0.698063	0.0371808	--	protein MODIFIER OF SNC1 11-like; K18732 SAP domain-containing ribonucleoprotein (A)	Protein MODIFIER OF SNC1 11 OS=Arabidopsis thaliana GN=MOS11 PE=1 SV=1	--
BnaA10T0289700WE	-0.166531	0.348594	0.334391	0.268928	1.54914	0.0224087	--	RNA polymerase II-associated factor 1 homolog; K15174 RNA polymerase II-associated factor 1 (A)	Protein PAF1 homolog OS=Arabidopsis thaliana GN=VIP2 PE=1 SV=1	Paf1
BnaA10T0291200WE	-0.1173	0.0468917	0.393231	0.074441	0.830386	0.0291556	GO:0004842	uncharacterized LOC104816269; K11978 E3 ubiquitin-protein ligase UBR3 [EC:2.3.2.27] (A)	E3 ubiquitin-protein ligase PRT6 OS=Arabidopsis thaliana GN=PRT6 PE=2 SV=1	Putative zinc finger in N-recognin (UBR box)
BnaA10T0292800WE	-0.157943	0.366877	0.564862	0.0780857	1.70432	0.0330797	--	phosphopantothenate--cysteine ligase 2-like; K01922 phosphopantothenate-cysteine ligase [EC:6.3.2.5] (A)	Phosphopantothenate--cysteine ligase 2 OS=Arabidopsis thaliana GN=PPCS2 PE=2 SV=2	DNA / pantothenate metabolism flavoprotein
BnaA10T0292900WE	-0.270681	0.0423884	-0.862022	0.00391338	-0.561102	0.00104812	GO:0004672	wall-associated receptor kinase-like 20; K04733 interleukin-1 receptor-associated kinase 4 [EC:2.7.11.1] (A)	Wall-associated receptor kinase-like 20 OS=Arabidopsis thaliana GN=WAKL20 PE=2 SV=1	Wall-associated receptor kinase galacturonan-binding
BnaA10T0295000WE	-0.26063	0.260997	-0.750444	0.170092	-2.75511	0.0282163	GO:0000287	pyruvate decarboxylase 1-like; K01568 pyruvate decarboxylase [EC:4.1.1.1] (A)	Pyruvate decarboxylase 1 OS=Arabidopsis thaliana GN=PDC1 PE=2 SV=1	Thiamine pyrophosphate enzyme, C-terminal TPP binding domain
BnaC01T0005700WE	0.073287	0.328274	0.655253	0.0216553	1.04751	0.0303797	GO:0004553	beta-galactosidase 12; K12309 beta-galactosidase [EC:3.2.1.23] (A)	Beta-galactosidase 3 OS=Arabidopsis thaliana GN=BGAL3 PE=1 SV=1	Galactose binding lectin domain
BnaC01T0007800WE	-0.279234	0.148351	0.170611	0.377	1.33897	0.0419685	GO:0005515	transformation/transcription domain-associated protein; K08874 transformation/transcription domain-associated protein (A)	Transcription-associated protein 1 OS=Schizosaccharomyces pombe (strain 972 / ATCC 24843) GN=tra1 PE=3 SV=1	FATC domain
BnaC01T0010400WE	-0.039393	0.327712	0.277119	0.0209975	1.5201	0.00705284	GO:0003677	DNA-directed RNA polymerase II subunit 1-like; K03006 DNA-directed RNA polymerase II subunit RPB1 [EC:2.7.7.6] (A)	DNA-directed RNA polymerase II subunit rpb1 OS=Dictyostelium discoideum GN=polr2a PE=2 SV=2	Phospholipase D Active site motif
BnaC01T0011800WE	-0.308152	0.0718663	-0.312546	0.0694602	0.636382	0.00245395	--	high mobility group B protein 4-like; K11296 high mobility group protein B3 (A)	High mobility group B protein 4 OS=Arabidopsis thaliana GN=HMGB4 PE=1 SV=1	HMG (high mobility group) box
BnaC01T0013800WE	0.124961	0.138546	-0.0293142	0.344769	0.510893	0.00398107	GO:0004672	CPK5-2.1, CPK5.1; calcium-dependent protein kinase 5 (EC:2.7.11.1); K13412 calcium-dependent protein kinase [EC:2.7.11.1] (A)	Calcium-dependent protein kinase 5 OS=Arabidopsis thaliana GN=CPK5 PE=2 SV=1	EF-hand domain pair
BnaC01T0014800WE	0.0273708	0.110888	0.413359	0.017928	1.14499	0.00503495	GO:0004672	probable serine/threonine-protein kinase At4g35230; K14500 BR-signaling kinase [EC:2.7.11.1] (A)	Probable serine/threonine-protein kinase At4g35230 OS=Arabidopsis thaliana GN=At4g35230 PE=1 SV=1	TPR repeat
BnaC01T0015800WE	0.237655	0.0195197	0.248591	0.122067	0.942676	0.00554922	GO:0005215	aquaporin PIP2-7; K09872 aquaporin PIP (A)	Aquaporin PIP2-7 OS=Arabidopsis thaliana GN=PIP2-7 PE=1 SV=2	Major intrinsic protein
BnaC01T0016300WE	0.0385	0.238436	0.247871	0.0554288	1.23915	0.00521353	GO:0030001	heavy metal-associated isoprenylated plant protein 26-like; K10752 histone-binding protein RBBP4 (A)	Heavy metal-associated isoprenylated plant protein 26 OS=Arabidopsis thaliana GN=HIPP26 PE=1 SV=1	Heavy-metal-associated domain
BnaC01T0021600WE	-0.238399	0.0403009	0.116554	0.052983	0.528551	0.0236407	GO:0004553	guanine nucleotide-binding protein subunit beta; K04536 guanine nucleotide-binding protein G(I)/G(S)/G(T) subunit beta-1 (A)	Glucan endo-1,3-beta-glucosidase 7 OS=Arabidopsis thaliana GN=At4g34480 PE=1 SV=2	X8 domain
BnaC01T0023200WE	-0.169979	0.327416	0.452027	0.112108	-0.800641	0.0115273	--	queuine tRNA-ribosyltransferase (predicted) (EC:2.4.2.29); K00773 queuine tRNA-ribosyltransferase [EC:2.4.2.29] (A)	Thioredoxin domain-containing protein 9 homolog OS=Arabidopsis thaliana GN=At2g18990 PE=2 SV=1	Phosducin
BnaC01T0029300WE	0.682368	0.376095	0.280416	0.011315	1.08957	0.00733589	GO:0003849	phospho-2-dehydro-3-deoxyheptonate aldolase 2, chloroplastic; K01626 3-deoxy-7-phosphoheptulonate synthase [EC:2.5.1.54] (A)	Phospho-2-dehydro-3-deoxyheptonate aldolase 2, chloroplastic OS=Arabidopsis thaliana GN=DHS2 PE=2 SV=2	Class-II DAHP synthetase family
BnaC01T0031500WE	0.123802	0.0351933	-0.893156	0.00260694	-0.646454	0.00334722	GO:0003743	eukaryotic translation initiation factor 3 subunit K-like; K15028 translation initiation factor 3 subunit K (A)	Eukaryotic translation initiation factor 3 subunit K OS=Arabidopsis thaliana GN=TIF3K1 PE=2 SV=1	SAC3/GANP family
BnaC01T0033200WE	0.00346315	0.0731435	0.484066	0.106081	0.740942	0.0210582	GO:0008610	(S)-coclaurine N-methyltransferase; K13384 (S)-coclaurine N-methyltransferase [EC:2.1.1.140] (A)	(S)-coclaurine N-methyltransferase OS=Thalictrum flavum subsp. glaucum PE=1 SV=1	Mycolic acid cyclopropane synthetase
BnaC01T0034100WE	0.117908	0.0338207	0.212675	0.079842	0.757649	0.0162589	GO:0004375	glycine dehydrogenase (decarboxylating) 1, mitochondrial; K00281 glycine dehydrogenase [EC:1.4.4.2] (A)	Glycine dehydrogenase (decarboxylating) 1, mitochondrial OS=Arabidopsis thaliana GN=GLDP1 PE=1 SV=2	Glycine cleavage system P-protein
BnaC01T0035000WE	-0.185133	0.150421	0.331452	0.160758	2.54039	0.00769144	GO:0004197	vacuolar-processing enzyme gamma-isozyme; K01369 legumain [EC:3.4.22.34] (A)	Vacuolar-processing enzyme gamma-isozyme OS=Arabidopsis thaliana GN=At4g32940 PE=2 SV=2	Peptidase C13 family
BnaC01T0037600WE	0.0758828	0.204876	-0.0165777	0.364884	-0.810678	0.0130463	GO:0003872	ATP-dependent 6-phosphofructokinase 6; K00850 6-phosphofructokinase 1 [EC:2.7.1.11] (A)	ATP-dependent 6-phosphofructokinase 6 OS=Arabidopsis thaliana GN=PFK6 PE=1 SV=1	Phosphofructokinase
BnaC01T0050200WE	-0.438775	0.115196	-0.273122	0.0802515	1.27375	0.000738028	--	polyribonucleotide nucleotidyltransferase 2, mitochondrial-like; K00962 polyribonucleotide nucleotidyltransferase [EC:2.7.7.8] (A)	Selenoprotein H OS=Macaca fascicularis GN=SELH PE=2 SV=2	--
BnaC01T0060800WE	0.0999288	0.328797	0.531253	0.0668215	0.995436	0.00280057	GO:0004252	peptidase, putative (EC:3.4.21.25); K18443 golgi-specific brefeldin A-resistance guanine nucleotide exchange factor 1 (A)	Subtilisin-like protease SBT2.5 OS=Arabidopsis thaliana GN=SBT2.5 PE=2 SV=1	PA domain
BnaC01T0066800WE	0.0180786	0.313828	0.265338	0.124169	-1.0794	0.0110239	GO:0003735	40S ribosomal protein S15a-5; K02957 small subunit ribosomal protein S15Ae (A)	40S ribosomal protein S15a-5 OS=Arabidopsis thaliana GN=RPS15AE PE=2 SV=1	Ribosomal protein S8
BnaC01T0067800WE	-0.0650236	0.131164	-0.460568	0.0228139	-0.502749	0.00525761	GO:0003779	profilin-1; K05759 profilin (A)	Profilin-1 OS=Arabidopsis thaliana GN=PRO1 PE=1 SV=1	Profilin
BnaC01T0071300WE	0.878211	0.00361906	0.750567	0.069903	1.35424	0.00462419	GO:0003824	--	Bark storage protein A OS=Populus deltoides GN=BSPA PE=2 SV=1	Phosphorylase superfamily
BnaC01T0073200WE	-0.588574	0.103338	-1.40198	0.0183627	-0.579231	0.0267927	GO:0009055	glutaredoxin-C5, chloroplastic-like; K03676 glutaredoxin 3 (A)	Glutaredoxin-C5, chloroplastic OS=Arabidopsis thaliana GN=GRXC5 PE=1 SV=1	Glutaredoxin
BnaC01T0079100WE	-0.199999	0.128762	-0.341108	0.0287694	-0.519687	0.0138936	--	--	--	--
BnaC01T0089500WE	-0.420248	0.358202	-0.940723	0.162313	0.789095	0.0374724	--	replication protein A 14 kDa subunit B; K10740 replication factor A3 (A)	Replication protein A 14 kDa subunit B OS=Arabidopsis thaliana GN=RPA3B PE=1 SV=1	Replication factor A protein 3
BnaC01T0103000WE	0.0900743	0.213634	-0.268974	0.0888622	-0.82707	0.0213829	--	uncharacterized LOC105166581; K00655 1-acyl-sn-glycerol-3-phosphate acyltransferase [EC:2.3.1.51] (A)	Multiple organellar RNA editing factor 1, mitochondrial OS=Arabidopsis thaliana GN=MORF1 PE=1 SV=1	--
BnaC01T0104600WE	-0.0278057	0.3595	-0.396274	0.123048	1.98639	0.0230875	GO:0046658	--	Plasma membrane-associated cation-binding protein 1 OS=Arabidopsis thaliana GN=PCAP1 PE=1 SV=1	DREPP plasma membrane polypeptide
BnaC01T0106000WE	-0.996339	0.0879356	-0.25283	0.143671	0.908763	0.00443306	GO:0004252	peptidase, putative (EC:3.4.21.25); K18443 golgi-specific brefeldin A-resistance guanine nucleotide exchange factor 1 (A)	Subtilisin-like protease SBT2.5 OS=Arabidopsis thaliana GN=SBT2.5 PE=2 SV=1	Peptidase inhibitor I9
BnaC01T0161000WE	-0.0987397	0.191211	0.350871	0.0924895	1.56636	0.0337592	--	--	--	--
BnaC01T0174300WE	-0.133877	0.0357366	-0.80816	0.167903	-2.19043	0.0329038	GO:0004459	L-lactate dehydrogenase B-like; K00016 L-lactate dehydrogenase [EC:1.1.1.27] (A)	L-lactate dehydrogenase B (Fragment) OS=Hordeum vulgare PE=1 SV=1	lactate/malate dehydrogenase, alpha/beta C-terminal domain
BnaC01T0185800WE	-0.270488	0.215615	0.0901569	0.296056	-0.632521	0.0189316	GO:0004553	hypothetical protein; K19891 glucan endo-1,3-beta-glucosidase 1/2/3 [EC:3.2.1.39] (A)	Glucan endo-1,3-beta-glucosidase, basic vacuolar isoform OS=Hevea brasiliensis GN=HGN1 PE=1 SV=2	Glycosyl hydrolases family 17
BnaC01T0200100WE	0.0803674	0.109885	-0.408089	0.00388559	-0.545991	0.00529276	GO:0010309	1,2-dihydroxy-3-keto-5-methylthiopentene dioxygenase 2; K08967 1,2-dihydroxy-3-keto-5-methylthiopentene dioxygenase [EC:1.13.11.53 1.13.11.54] (A)	1,2-dihydroxy-3-keto-5-methylthiopentene dioxygenase 3 OS=Arabidopsis thaliana GN=ARD3 PE=2 SV=1	ARD/ARD' family
BnaC01T0221000WE	0.898975	0.0131137	-0.976904	0.0222077	-0.86511	0.0498927	GO:0004601	peroxidase 34-like; K00430 peroxidase [EC:1.11.1.7] (A)	Peroxidase 34 OS=Arabidopsis thaliana GN=PER34 PE=1 SV=1	Peroxidase
BnaC01T0238900WE	0.275128	0.279549	0.448939	0.217677	2.09361	0.0218438	GO:0016021	hypothetical protein; K17345 tetraspanin-5 (A)	Tetraspanin-3 OS=Arabidopsis thaliana GN=TET3 PE=2 SV=1	Tetraspanin family
BnaC01T0250000WE	-0.465661	0.00197108	0.102191	0.37227	0.983733	0.0110574	GO:0008137	NADH-ubiquinone/plastoquinone (complex I) protein; K03879 NADH-ubiquinone oxidoreductase chain 2 [EC:1.6.5.3] (A)	NADH-ubiquinone oxidoreductase chain 2 OS=Arabidopsis thaliana GN=ND2 PE=2 SV=2	Proton-conducting membrane transporter
BnaC01T0255100WE	0.0895609	0.211248	0.178968	0.156465	0.549747	0.00887673	GO:0005506	linoleate 9S-lipoxygenase 1-like; K15718 linoleate 9S-lipoxygenase [EC:1.13.11.58] (A)	Linoleate 9S-lipoxygenase 1 OS=Arabidopsis thaliana GN=LOX1 PE=1 SV=1	PLAT/LH2 domain
BnaC01T0264000WE	-0.319559	0.0496867	0.107413	0.194895	0.571502	0.0049563	GO:0003924	dynamin-2B-like; K01528 dynamin GTPase [EC:3.6.5.5] (A)	Dynamin-2B OS=Arabidopsis thaliana GN=DRP2B PE=1 SV=2	Dynamin GTPase effector domain
BnaC01T0269400WE	0.0131077	0.308571	0.518135	0.00143024	0.605863	0.00217854	GO:0003924	dynamin-related protein 4C-like; K14754 interferon-induced GTP-binding protein Mx1 (A)	Dynamin-related protein 4C OS=Arabidopsis thaliana GN=DRP4C PE=2 SV=1	Dynamin GTPase effector domain
BnaC01T0279900WE	-1.49118	0.14519	0.430058	0.0828806	0.532985	0.00719156	GO:0005515	nitric oxide synthase-interacting protein-like; K13125 nitric oxide synthase-interacting protein (A)	Nitric oxide synthase-interacting protein OS=Xenopus laevis GN=nosip PE=2 SV=1	Zinc finger, C3HC4 type (RING finger)
BnaC01T0282500WE	-0.440302	0.217709	0.222969	0.241337	1.23617	0.0402869	GO:0004553	beta-glucosidase 46-like; K05350 beta-glucosidase [EC:3.2.1.21] (A)	Beta-glucosidase 46 OS=Arabidopsis thaliana GN=BGLU46 PE=1 SV=2	Glycosyl hydrolase family 1
BnaC01T0289400WE	0.742561	0.0582586	-0.122451	0.152034	0.612539	0.0125756	GO:0004672	probable receptor protein kinase TMK1; K17285 selenium-binding protein 1 (A)	Receptor-like kinase TMK4 OS=Arabidopsis thaliana GN=TMK4 PE=1 SV=1	Leucine Rich repeat
BnaC01T0294000WE	-0.525563	0.00340974	-1.16548	0.00199443	-1.6689	0.00258687	GO:0003735	rpl14, BRNAC_p058; ribosomal protein L14; K02874 large subunit ribosomal protein L14 (A)	50S ribosomal protein L14, chloroplastic OS=Capsella bursa-pastoris GN=rpl14 PE=3 SV=1	Ribosomal protein L14p/L23e
BnaC01T0304900WE	0.0787714	0.246074	-0.0398619	0.264809	0.654298	0.0260856	--	--	--	--
BnaC01T0307400WE	0.202	0.013005	0.064732	0.241984	0.744184	0.00533484	GO:0008483	gamma-aminobutyrate transaminase POP2, mitochondrial-like; K16871 4-aminobutyrate---pyruvate transaminase [EC:2.6.1.96] (A)	Gamma-aminobutyrate transaminase POP2, mitochondrial OS=Arabidopsis thaliana GN=POP2 PE=1 SV=1	Aminotransferase class-III
BnaC01T0310600WE	-0.0782027	0.259607	0.442595	0.00572218	1.37464	0.00789679	GO:0004601	peroxidase 30; K00430 peroxidase [EC:1.11.1.7] (A)	Peroxidase 30 OS=Arabidopsis thaliana GN=PER30 PE=1 SV=1	Peroxidase
BnaC01T0340500WE	-0.900036	0.0112349	0.403481	0.0340175	1.05638	0.0111387	GO:0004553	beta-glucosidase 43; K05350 beta-glucosidase [EC:3.2.1.21] (A)	Beta-glucosidase 44 OS=Arabidopsis thaliana GN=BGLU44 PE=2 SV=1	Glycosyl hydrolase family 1
BnaC01T0340700WE	-0.245873	0.0469504	0.0893654	0.276252	0.998903	0.0290214	GO:0000785	HMG-Y-related protein A-like; K11275 histone H1/5 (A)	HMG-Y-related protein A OS=Glycine max PE=2 SV=1	linker histone H1 and H5 family
BnaC01T0353400WE	0.158043	0.254682	-0.542562	0.0132824	-0.819817	0.000832432	--	--	Translationally-controlled tumor protein homolog OS=Brassica oleracea GN=TCTP PE=2 SV=1	Translationally controlled tumour protein
BnaC01T0359800WE	-0.532884	0.198218	0.900857	0.109216	1.41595	0.0339376	GO:0003677	--	Methyl-CpG-binding domain-containing protein 11 OS=Arabidopsis thaliana GN=MBD11 PE=1 SV=1	Methyl-CpG binding domain
BnaC01T0360000WE	0.303095	0.0306666	0.294148	0.038182	0.553918	0.00516303	GO:0003824	phospholipase D alpha 2; K01115 phospholipase D1/2 [EC:3.1.4.4] (A)	Phospholipase D alpha 2 OS=Brassica oleracea var. capitata GN=PLD2 PE=1 SV=2	C2 domain
BnaC01T0366800WE	0.4189	0.0173038	0.0504137	0.26415	-0.513306	0.0217804	GO:0006099	phosphoenolpyruvate carboxylase 3; K01595 phosphoenolpyruvate carboxylase [EC:4.1.1.31] (A)	Phosphoenolpyruvate carboxylase 3 OS=Arabidopsis thaliana GN=PPC3 PE=2 SV=2	Phosphoenolpyruvate carboxylase
BnaC01T0367800WE	0.0745446	0.185238	-0.196767	0.168656	-1.05867	0.0264105	GO:0003824	trifunctional UDP-glucose 4,6-dehydratase/UDP-4-keto-6-deoxy-D-glucose 3,5-epimerase/UDP-4-keto-L-rhamnose-reductase RHM3; K12450 UDP-glucose 4,6-dehydratase [EC:4.2.1.76] (A)	Trifunctional UDP-glucose 4,6-dehydratase/UDP-4-keto-6-deoxy-D-glucose 3,5-epimerase/UDP-4-keto-L-rhamnose-reductase RHM3 OS=Arabidopsis thaliana GN=RHM3 PE=1 SV=1	RmlD substrate binding domain
BnaC01T0371200WE	-0.357501	0.0295099	0.590415	0.0219956	1.91267	0.00336348	GO:0004857	pectinesterase/pectinesterase inhibitor 3-like; K01051 pectinesterase [EC:3.1.1.11] (A)	Pectinesterase/pectinesterase inhibitor 3 OS=Arabidopsis thaliana GN=PME3 PE=2 SV=2	Plant invertase/pectin methylesterase inhibitor
BnaC01T0373000WE	-0.0229144	0.19687	0.0725432	0.29504	0.769879	0.00667626	GO:0004252	peptidase, putative (EC:3.4.21.25); K18443 golgi-specific brefeldin A-resistance guanine nucleotide exchange factor 1 (A)	Subtilisin-like protease SBT1.7 OS=Arabidopsis thaliana GN=SBT1.7 PE=1 SV=1	PA domain
BnaC01T0386900WE	-0.0968559	0.0216864	-0.0483788	0.17179	0.917553	0.0243452	--	probable mediator of RNA polymerase II transcription subunit 37c; K03283 heat shock 70kDa protein 1/8 (A)	Probable mediator of RNA polymerase II transcription subunit 37c OS=Arabidopsis thaliana GN=MED37C PE=1 SV=1	Hsp70 protein
BnaC01T0389700WE	-0.0357284	0.384976	-0.507462	0.0402057	-0.510417	0.0314701	GO:0005515	GRMZM2G129493, GRMZM2G362362; uncharacterized LOC103648573; K01188 beta-glucosidase [EC:3.2.1.21] (A)	Polygalacturonase inhibitor 1 OS=Arabidopsis thaliana GN=PGIP1 PE=2 SV=1	Leucine Rich repeat
BnaC01T0415200WE	-0.534026	0.0260743	0.324054	0.103863	0.687044	0.0124828	--	--	--	Protein of unknown function (DUF642)
BnaC01T0416900WE	-0.0423281	0.265371	-0.0952735	0.329584	-0.888855	0.0309746	GO:0003676	heterogeneous nuclear ribonucleoprotein 1-like; K14411 RNA-binding protein Musashi (A)	Heterogeneous nuclear ribonucleoprotein 1 OS=Arabidopsis thaliana GN=RNP1 PE=1 SV=1	RNA recognition motif. (a.k.a. RRM, RBD, or RNP domain)
BnaC01T0417300WE	0.0428637	0.365226	-0.079594	0.0914551	-0.661635	0.00981208	GO:0005524	heat shock protein 90-1-like; K09487 heat shock protein 90kDa beta (A)	Heat shock protein 90 OS=Theileria parva GN=TP02_0244 PE=2 SV=2	Histidine kinase-, DNA gyrase B-, and HSP90-like ATPase
BnaC01T0418000WE	0.315471	0.226062	0.645633	0.0357318	2.13277	0.0243849	GO:0016021	ceramidase; K12349 neutral ceramidase [EC:3.5.1.23] (A)	Cytochrome b561 and DOMON domain-containing protein At3g07570 OS=Arabidopsis thaliana GN=At3g07570 PE=2 SV=1	Eukaryotic cytochrome b561
BnaC01T0420600WE	-0.431524	0.0734716	0.26531	0.132972	0.573472	0.0179622	GO:0006886	protein transport protein Sec24-like At3g07100; K14007 protein transport protein SEC24 (A)	Protein transport protein Sec24-like At3g07100 OS=Arabidopsis thaliana GN=At3g07100 PE=2 SV=2	Gelsolin repeat
BnaC01T0438600WE	0.220284	0.0706457	0.650185	0.00302662	1.2606	0.00835727	--	uncharacterized LOC103421379; K17609 nucleoredoxin [EC:1.8.1.8] (A)	Protein SIEVE ELEMENT OCCLUSION B OS=Arabidopsis thaliana GN=SEOB PE=1 SV=1	Sieve element occlusion C-terminus
BnaC01T0448300WE	-0.184268	0.112741	0.0183477	0.215027	0.68699	0.0191522	GO:0004672	probable inactive receptor kinase At2g26730; K04730 interleukin-1 receptor-associated kinase 1 [EC:2.7.11.1] (A)	Probable inactive receptor kinase At3g02880 OS=Arabidopsis thaliana GN=At3g02880 PE=1 SV=1	Leucine rich repeat N-terminal domain
BnaC02T0016500WE	-0.521992	0.118253	-0.0653006	0.353584	0.61569	0.0357653	GO:0004640	N-(5'-phosphoribosyl)anthranilate isomerase 1, chloroplastic-like; K01817 phosphoribosylanthranilate isomerase [EC:5.3.1.24] (A)	N-(5'-phosphoribosyl)anthranilate isomerase 1, chloroplastic OS=Arabidopsis thaliana GN=PAI1 PE=2 SV=1	N-(5'phosphoribosyl)anthranilate (PRA) isomerase
BnaC02T0019000WE	-0.187272	0.0627376	-0.947881	0.012813	-1.66637	0.00272644	GO:0004221	ubiquitin carboxyl-terminal hydrolase 12; K11838 ubiquitin carboxyl-terminal hydrolase 7 [EC:3.4.19.12] (A)	Ubiquitin carboxyl-terminal hydrolase 12 OS=Arabidopsis thaliana GN=UBP12 PE=1 SV=2	MATH domain
BnaC02T0020400WE	-0.238978	0.380817	0.121489	0.383117	1.53238	0.0183574	GO:0005506	Cytochrome P450, putative; K00512 steroid 17alpha-monooxygenase / 17alpha-hydroxyprogesterone aldolase [EC:1.14.14.19 4.1.2.30] (A)	Beta-amyrin 24-hydroxylase OS=Glycine max GN=CYP93E1 PE=1 SV=1	Cytochrome P450
BnaC02T0026300WE	-0.394938	0.0984238	0.408033	0.093238	0.856287	0.00731501	GO:0004553	alpha-galactosidase 1; K07407 alpha-galactosidase [EC:3.2.1.22] (A)	Alpha-galactosidase 1 OS=Arabidopsis thaliana GN=AGAL1 PE=2 SV=1	Melibiase
BnaC02T0029600WE	-0.842514	0.159435	0.0491322	0.285429	2.04725	0.0110002	--	GFAP; glial fibrillary acidic protein; K05640 glial fibrillary acidic protein (A)	Periaxin OS=Homo sapiens GN=PRX PE=1 SV=2	--
BnaC02T0032700WE	0.141713	0.321919	0.602814	0.018213	1.27851	0.00955628	GO:0008152	hypothetical protein; K06123 1-acylglycerone phosphate reductase [EC:1.1.1.101] (A)	NADPH-dependent 1-acyldihydroxyacetone phosphate reductase OS=Schizosaccharomyces pombe (strain 972 / ATCC 24843) GN=ayr1 PE=3 SV=2	short chain dehydrogenase
BnaC02T0036000WE	-1.83829	0.0112362	0.907273	0.00992751	3.68347	0.0195147	GO:0004190	hypothetical protein; K01381 saccharopepsin [EC:3.4.23.25] (A)	Protein ASPARTIC PROTEASE IN GUARD CELL 2 OS=Arabidopsis thaliana GN=ASPG2 PE=2 SV=1	Xylanase inhibitor C-terminal
BnaC02T0039100WE	-0.301281	0.207578	0.402373	0.0524026	0.630963	0.0165224	--	--	--	Protein of unknown function (DUF642)
BnaC02T0060900WE	-0.787837	0.10276	0.0711769	0.175694	1.31008	0.0393731	GO:0004601	peroxidase 56-like; K00430 peroxidase [EC:1.11.1.7] (A)	Peroxidase 56 OS=Arabidopsis thaliana GN=PER56 PE=2 SV=1	Peroxidase
BnaC02T0068600WE	-0.214049	0.0583429	0.564801	0.0386617	0.716591	0.0276177	GO:0004672	pollen receptor-like kinase 2; K04730 interleukin-1 receptor-associated kinase 1 [EC:2.7.11.1] (A)	Probable inactive receptor kinase At5g16590 OS=Arabidopsis thaliana GN=At5g16590 PE=1 SV=1	Leucine rich repeat N-terminal domain
BnaC02T0087100WE	0.335321	0.177965	0.0240179	0.200902	-0.690434	0.00532135	GO:0005622	translation initiation factor eIF-2B subunit gamma-like; K03241 translation initiation factor eIF-2B subunit gamma (A)	Translation initiation factor eIF-2B subunit gamma OS=Dictyostelium discoideum GN=eif2b3 PE=3 SV=1	Bacterial transferase hexapeptide (six repeats)
BnaC02T0096100WE	-0.45733	0.0131775	0.814677	0.00522761	1.28313	0.00128165	GO:0005375	hypothetical protein; K14686 solute carrier family 31 (copper transporter), member 1 (A)	Copper transporter 5 OS=Arabidopsis thaliana GN=COPT5 PE=1 SV=1	Ctr copper transporter family
BnaC02T0098400WE	-0.731974	0.0871691	0.245514	0.174577	0.700511	0.049491	GO:0004553	lysosomal beta glucosidase-like; K05349 beta-glucosidase [EC:3.2.1.21] (A)	Beta-glucosidase BoGH3B OS=Bacteroides ovatus (strain ATCC 8483 / DSM 1896 / JCM 5824 / NCTC 11153) GN=BACOVA_02659 PE=1 SV=1	Glycosyl hydrolase family 3 C-terminal domain
BnaC02T0099100WE	0.283502	0.139844	0.856921	0.0443181	1.14431	0.0261245	--	inactive protein RESTRICTED TEV MOVEMENT 2-like; K13993 HSP20 family protein (A)	Inactive protein RESTRICTED TEV MOVEMENT 2 OS=Arabidopsis thaliana GN=RTM2 PE=3 SV=1	Hsp20/alpha crystallin family
BnaC02T0100100WE	-0.24693	0.0546094	1.10137	0.0692221	1.56354	0.00262507	GO:0008270	probable E3 ubiquitin ligase SUD1; K10661 E3 ubiquitin-protein ligase MARCH6 [EC:2.3.2.27] (A)	ERAD-associated E3 ubiquitin-protein ligase DOA10 OS=Saccharomyces cerevisiae (strain ATCC 204508 / S288c) GN=SSM4 PE=1 SV=1	RING-variant domain
BnaC02T0105000WE	0.383389	0.0520547	-0.912981	0.0236987	-1.08599	0.00687282	GO:0003723	60S ribosomal protein L10a-3-like; K02865 large subunit ribosomal protein L10Ae (A)	60S ribosomal protein L10a-3 OS=Arabidopsis thaliana GN=RPL10AC PE=1 SV=1	Alpha/beta hydrolase family
BnaC02T0107100WE	-1.13317	0.0355297	-0.955237	0.0253025	-2.00389	0.00206123	--	histone deacetylase HDT1; K11276 nucleophosmin 1 (A)	Histone deacetylase HDT2 OS=Arabidopsis thaliana GN=HDT2 PE=1 SV=2	--
BnaC02T0113900WE	-0.397015	0.214945	-0.0550708	0.254362	0.942987	0.00585847	GO:0006508	thiol protease aleurain-like; K01366 cathepsin H [EC:3.4.22.16] (A)	Thiol protease aleurain OS=Arabidopsis thaliana GN=ALEU PE=1 SV=2	Cathepsin propeptide inhibitor domain (I29)
BnaC02T0126200WE	-2.68467	0.271301	0.597199	0.170992	-0.59526	0.00637216	GO:0004435	phosphoinositide phospholipase C 1-like; K05857 phosphatidylinositol phospholipase C, delta [EC:3.1.4.11] (A)	Phosphoinositide phospholipase C 1 OS=Arabidopsis thaliana GN=PLC1 PE=2 SV=1	C2 domain
BnaC02T0128500WE	0.234801	0.162763	-0.630727	0.0747006	-0.620163	0.0459579	GO:0000166	26S protease regulatory subunit 6B homolog; K03063 26S proteasome regulatory subunit T3 (A)	26S protease regulatory subunit 6B homolog OS=Arabidopsis thaliana GN=RPT3 PE=1 SV=1	ATPase family associated with various cellular activities (AAA)
BnaC02T0146100WE	-0.0637643	0.378915	0.0405617	0.174404	-0.781364	0.0356398	GO:0005524	heat shock protein 90-2-like; K04079 molecular chaperone HtpG (A)	Heat shock protein 90-4 OS=Arabidopsis thaliana GN=HSP90-4 PE=2 SV=1	Hsp90 protein
BnaC02T0146600WE	-0.605991	0.0131272	0.601763	0.00597413	-0.641656	0.00934575	GO:0005524	heat shock protein 90-2-like; K04079 molecular chaperone HtpG (A)	Heat shock protein 90-4 OS=Arabidopsis thaliana GN=HSP90-4 PE=2 SV=1	Histidine kinase-, DNA gyrase B-, and HSP90-like ATPase
BnaC02T0157500WE	-0.617865	0.103277	-0.685487	0.0170747	0.588973	0.0382389	GO:0010181	NAD(P)H dehydrogenase (quinone) FQR1-like; K03809 NAD(P)H dehydrogenase (quinone) [EC:1.6.5.2] (A)	NAD(P)H dehydrogenase (quinone) FQR1 OS=Arabidopsis thaliana GN=FQR1 PE=1 SV=1	NADPH-dependent FMN reductase
BnaC02T0158500WE	0.364265	0.0711215	-0.0474571	0.238279	-0.878481	0.0122817	GO:0005198	VAPA; VAMP (vesicle-associated membrane protein)-associated protein A, 33kDa; K06096 vesicle-associated membrane protein-associated protein A (A)	Vesicle-associated protein 4-1 OS=Arabidopsis thaliana GN=PVA41 PE=2 SV=1	MSP (Major sperm protein) domain
BnaC02T0198500WE	-0.0155859	0.309776	-1.1472	0.0121588	-1.56186	0.00499316	GO:0008168	hypothetical protein; K18848 indole-3-acetate O-methyltransferase [EC:2.1.1.278] (A)	Probable S-adenosylmethionine-dependent methyltransferase At5g37990 OS=Arabidopsis thaliana GN=At5g37990 PE=3 SV=2	SAM dependent carboxyl methyltransferase
BnaC02T0205500WE	0.245168	0.126513	0.902683	0.0102219	1.63493	0.00682779	--	CTD small phosphatase-like protein 2; K17616 CTD small phosphatase-like protein 2 [EC:3.1.3.-] (A)	REF/SRPP-like protein At1g67360 OS=Arabidopsis thaliana GN=At1g67360 PE=2 SV=1	Rubber elongation factor protein (REF)
BnaC02T0238300WE	-0.194707	0.167394	0.175526	0.185916	1.05316	0.0201461	GO:0005337	equilibrative nucleotide transporter 1-like; K15014 solute carrier family 29 (equilibrative nucleoside transporter), member 1/2/3 (A)	Equilibrative nucleotide transporter 1 OS=Arabidopsis thaliana GN=ENT1 PE=1 SV=1	Nucleoside transporter
BnaC02T0243900WE	-0.142626	0.238181	-0.0224228	0.208284	0.8956	0.00423699	GO:0006952	--	MLP-like protein 28 OS=Arabidopsis thaliana GN=MLP28 PE=1 SV=1	Pathogenesis-related protein Bet v I family
BnaC02T0252500WE	-0.0659978	0.152401	0.191854	0.147585	1.79272	0.0204275	GO:0006810	hypothetical protein; K19996 phosphatidylinositol transfer protein SFH5 (A)	Patellin-1 OS=Arabidopsis thaliana GN=PATL1 PE=1 SV=2	CRAL/TRIO, N-terminal domain
BnaC02T0264500WE	0.116526	0.165151	-0.300885	0.162206	-0.848054	0.00831203	GO:0004866	--	Alpha-amylase/subtilisin inhibitor OS=Oryza sativa subsp. japonica GN=RASI PE=1 SV=2	Trypsin and protease inhibitor
BnaC02T0275700WE	-0.641606	0.225395	-0.212511	0.299857	-0.889264	0.01527	--	3-oxoacyl-[acyl-carrier-protein] synthase II, chloroplastic-like; K09458 3-oxoacyl-[acyl-carrier-protein] synthase II [EC:2.3.1.179] (A)	3-oxoacyl-[acyl-carrier-protein] synthase II, chloroplastic OS=Arabidopsis thaliana GN=KAS2 PE=1 SV=1	Beta-ketoacyl synthase, C-terminal domain
BnaC02T0292900WE	0.337633	0.225378	-0.46536	0.019938	-0.795958	0.0480064	GO:0016491	1-aminocyclopropane-1-carboxylate oxidase 5; K05933 aminocyclopropanecarboxylate oxidase [EC:1.14.17.4] (A)	1-aminocyclopropane-1-carboxylate oxidase 5 OS=Arabidopsis thaliana GN=At1g77330 PE=2 SV=1	2OG-Fe(II) oxygenase superfamily
BnaC02T0293500WE	0.595251	0.167732	0.455799	0.178284	1.47678	0.00560213	GO:0008168	caffeic acid 3-O-methyltransferase-like; K13066 caffeic acid 3-O-methyltransferase [EC:2.1.1.68] (A)	Caffeic acid 3-O-methyltransferase OS=Prunus dulcis GN=COMT1 PE=2 SV=1	Dimerisation domain
BnaC02T0298300WE	0.412939	0.0892005	-0.441015	0.110458	0.817735	0.0140817	--	--	Alpha-ketoglutarate-dependent dioxygenase alkB homolog 2 OS=Arabidopsis thaliana GN=ALKBH2 PE=2 SV=2	Protein of unknown function (DUF4057)
BnaC02T0308900WE	0.292624	0.0335047	0.37667	0.0704185	1.02566	0.000313309	GO:0005515	syntaxin-52-like; K08503 syntaxin of plants SYP5 (A)	Syntaxin-52 OS=Arabidopsis thaliana GN=SYP52 PE=1 SV=1	SNARE domain
BnaC02T0317500WE	0.428387	0.0221333	0.316942	0.192615	0.500042	0.039909	GO:0016491	gibberellin 20-oxidase; K05282 gibberellin 20-oxidase [EC:1.14.11.12] (A)	Probable 2-oxoglutarate-dependent dioxygenase AOP1.2 OS=Arabidopsis thaliana GN=AOP1.2 PE=2 SV=1	non-haem dioxygenase in morphine synthesis N-terminal
BnaC02T0325000WE	-0.26183	0.136918	0.531028	0.0713086	1.28223	0.0139457	GO:0008152	UDP-glycosyltransferase 72B1-like; K08237 hydroquinone glucosyltransferase [EC:2.4.1.218] (A)	UDP-glycosyltransferase 72B1 OS=Arabidopsis thaliana GN=UGT72B1 PE=1 SV=1	UDP-glucoronosyl and UDP-glucosyl transferase
BnaC02T0329000WE	0.0498706	0.350731	-0.343841	0.0156743	-0.563245	0.0133907	GO:0005515	hypothetical protein; K15043 importin subunit alpha-2 (A)	Importin subunit alpha-3 OS=Arabidopsis thaliana GN=IMPA3 PE=1 SV=2	Importin beta binding domain
BnaC02T0331600WE	1.0308	0.0238464	-0.526366	0.0745101	-0.756824	0.0251429	GO:0005515	GST1; glutathione S-transferase; K00799 glutathione S-transferase [EC:2.5.1.18] (A)	Glutathione S-transferase F3 OS=Arabidopsis thaliana GN=GSTF3 PE=2 SV=1	Glutathione S-transferase, C-terminal domain
BnaC02T0349500WE	0.711411	0.0377981	0.630435	0.0584252	1.00513	0.00448426	GO:0006508	probable cysteine proteinase At4g11320; K01365 cathepsin L [EC:3.4.22.15] (A)	Probable cysteine proteinase At4g11320 OS=Arabidopsis thaliana GN=At4g11320 PE=2 SV=1	Cathepsin propeptide inhibitor domain (I29)
BnaC02T0364000WE	0.0322514	0.374325	0.139515	0.220399	1.16563	0.0112968	GO:0006508	hypothetical protein; K16292 KDEL-tailed cysteine endopeptidase [EC:3.4.22.-] (A)	Cysteine proteinase RD21a OS=Arabidopsis thaliana GN=RD21A PE=1 SV=1	Granulin
BnaC02T0374800WE	0.442887	0.026836	0.499125	0.00936637	0.583446	0.000706424	GO:0005515	Kelch motif family protein; K14966 host cell factor (A)	Epithiospecifier protein OS=Arabidopsis thaliana GN=ESP PE=1 SV=2	Kelch motif
BnaC02T0394900WE	-0.0877272	0.0745923	0.25189	0.0166153	0.681281	0.00329263	--	coatomer subunit beta'-1-like; K17302 coatomer, subunit beta' (A)	Protein TPLATE OS=Arabidopsis thaliana GN=TPLATE PE=1 SV=1	--
BnaC02T0411900WE	0.3421	0.285982	0.0315049	0.201248	1.08062	0.013779	GO:0004553	glucan endo-1,3-beta-glucosidase 3-like; K19891 glucan endo-1,3-beta-glucosidase 1/2/3 [EC:3.2.1.39] (A)	Glucan endo-1,3-beta-glucosidase 3 OS=Arabidopsis thaliana GN=At2g01630 PE=1 SV=2	X8 domain
BnaC02T0412300WE	0.463091	0.0327848	0.219128	0.25845	0.510886	0.0212314	--	dnaJ homolog subfamily B member 14; K09518 DnaJ homolog subfamily B member 12 (A)	DnaJ homolog subfamily B member 9 OS=Rattus norvegicus GN=Dnajb9 PE=2 SV=2	DnaJ domain
BnaC02T0427800WE	-0.00478111	0.224424	-0.666787	0.0471346	-1.6677	0.00292751	GO:0008146	cytosolic sulfotransferase 12-like; K01025 [EC:2.8.2.-] (A)	Cytosolic sulfotransferase 12 OS=Arabidopsis thaliana GN=SOT12 PE=1 SV=2	Sulfotransferase domain
BnaC02T0435900WE	0.100346	0.223934	0.633906	0.0116358	0.986188	0.00219613	GO:0005506	CYP71B34; K00517 [EC:1.14.-.-] (A)	Cytochrome P450 71B37 OS=Arabidopsis thaliana GN=CYP71B37 PE=3 SV=2	Cytochrome P450
BnaC02T0459400WE	-0.379542	0.0268348	0.230479	0.0115808	0.756937	0.00133252	GO:0005975	alpha-glucan phosphorylase 1-like; K00688 starch phosphorylase [EC:2.4.1.1] (A)	Alpha-glucan phosphorylase 1 OS=Arabidopsis thaliana GN=PHS1 PE=2 SV=1	Carbohydrate phosphorylase
BnaC02T0476500WE	-0.286711	0.0691986	-0.0218102	0.191627	0.510311	0.00269987	GO:0005515	pre-mRNA-splicing factor SYF1-like; K12867 pre-mRNA-splicing factor SYF1 (A)	Pre-mRNA-splicing factor SYF1 OS=Rattus norvegicus GN=Xab2 PE=2 SV=1	--
BnaC02T0482100WE	0.166419	0.181966	-0.617488	0.142475	-1.48573	0.0267108	--	--	--	Hypoxia induced protein conserved region
BnaC02T0483400WE	-0.319697	0.0838369	0.393061	0.0253526	1.11384	0.0142559	GO:0005515	protein TOPLESS-like; K14963 COMPASS component SWD3 (A)	Topless-related protein 3 OS=Arabidopsis thaliana GN=TPR3 PE=1 SV=1	WD domain, G-beta repeat
BnaC02T0511100WE	0.00189787	0.242285	0.213083	0.153709	0.689005	0.0283188	GO:0008152	GLP1; GLP1 GID1-like protein; K14493 gibberellin receptor GID1 [EC:3.-.-.-] (A)	Probable carboxylesterase 120 OS=Arabidopsis thaliana GN=CXE20 PE=2 SV=1	alpha/beta hydrolase fold
BnaC02T0513000WE	-0.688097	0.0461299	0.211701	0.284353	-1.69285	0.00549721	--	pus4; tRNA pseudouridine synthase mitochondrial precursor; K01855 tRNA pseudouridine38/39 synthase [EC:5.4.99.45] (A)	Protein DCL, chloroplastic OS=Solanum lycopersicum GN=DCL PE=2 SV=1	Protein of unknown function (DUF3223)
BnaC02T0517100WE	-0.041887	0.15202	0.156629	0.195961	1.18397	0.00805647	GO:0003824	4-coumarate--CoA ligase-like 5; K10526 OPC-8:0 CoA ligase 1 [EC:6.2.1.-] (A)	4-coumarate--CoA ligase-like 9 OS=Arabidopsis thaliana GN=4CLL9 PE=1 SV=2	AMP-binding enzyme C-terminal domain
BnaC02T0519000WE	0.315862	0.0231496	-0.126421	0.308077	0.684432	0.00930483	GO:0016491	flavonol synthase 3-like; K05278 flavonol synthase [EC:1.14.11.23] (A)	Flavonol synthase 3 OS=Arabidopsis thaliana GN=FLS3 PE=2 SV=1	2OG-Fe(II) oxygenase superfamily
BnaC02T0532600WE	0.0566086	0.298508	-0.369751	0.0256338	-1.72725	0.00120828	GO:0004612	phosphoenolpyruvate carboxykinase [ATP]-like; K01610 phosphoenolpyruvate carboxykinase (ATP) [EC:4.1.1.49] (A)	Phosphoenolpyruvate carboxykinase [ATP] OS=Arabidopsis thaliana GN=PCKA PE=1 SV=1	Phosphoenolpyruvate carboxykinase
BnaC02T0537900WE	-0.19611	0.139514	0.0669455	0.373809	-1.30892	0.0133037	GO:0003824	GDP-mannose 4,6 dehydratase 1-like; K01711 GDPmannose 4,6-dehydratase [EC:4.2.1.47] (A)	GDP-mannose 4,6 dehydratase 1 OS=Arabidopsis thaliana GN=GMD1 PE=1 SV=1	NAD dependent epimerase/dehydratase family
BnaC03T0005200WE	0.13115	0.133848	-0.250403	0.180387	-0.687212	0.0255519	GO:0005975	uncharacterized LOC103856014; K00616 transaldolase [EC:2.2.1.2] (A)	Transaldolase 2 OS=Streptomyces avermitilis (strain ATCC 31267 / DSM 46492 / JCM 5070 / NCIMB 12804 / NRRL 8165 / MA-4680) GN=tal2 PE=3 SV=1	Transaldolase
BnaC03T0008200WE	1.00843	0.0314251	-0.0797261	0.363356	1.44525	0.0274311	GO:0004553	alpha-mannosidase; K01191 alpha-mannosidase [EC:3.2.1.24] (A)	Alpha-mannosidase OS=Canavalia ensiformis PE=1 SV=1	Alpha mannosidase middle domain
BnaC03T0008700WE	-0.354209	0.06063	-0.174313	0.0650973	-0.902028	0.00230276	GO:0005783	translocon-associated protein subunit beta-like; K13250 translocon-associated protein subunit beta (A)	Translocon-associated protein subunit beta OS=Canis familiaris GN=SSR2 PE=1 SV=1	Translocon-associated protein beta (TRAPB)
BnaC03T0026700WE	-0.488347	0.00240336	-0.369449	0.201248	-1.50214	0.0244301	GO:0008152	UTP--glucose-1-phosphate uridylyltransferase 1; K00963 UTP--glucose-1-phosphate uridylyltransferase [EC:2.7.7.9] (A)	UTP--glucose-1-phosphate uridylyltransferase 1 OS=Arabidopsis thaliana GN=At5g17310 PE=2 SV=1	UTP--glucose-1-phosphate uridylyltransferase
BnaC03T0030000WE	0.257955	0.314897	0.17262	0.116698	-0.749413	0.0218414	GO:0001522	putative H/ACA ribonucleoprotein complex subunit 1-like protein 1; K11128 H/ACA ribonucleoprotein complex subunit 1 (A)	Putative H/ACA ribonucleoprotein complex subunit 1-like protein 1 OS=Arabidopsis thaliana GN=At3g03920 PE=2 SV=1	Gar1/Naf1 RNA binding region
BnaC03T0033000WE	0.306123	0.073773	0.051571	0.138791	-0.806864	0.0156919	GO:0016491	bx6; benzoxazin 6 (EC:1.14.20.2); K13229 2,4-dihydroxy-1,4-benzoxazin-3-one-glucoside dioxygenase [EC:1.14.20.2] (A)	Probable 2-oxoacid dependent dioxygenase OS=Arabidopsis thaliana GN=GSL-OH PE=2 SV=1	non-haem dioxygenase in morphine synthesis N-terminal
BnaC03T0044600WE	-0.147257	0.110247	-0.558909	0.206083	-2.25077	0.0159662	GO:0005985	sucrose synthase 1; K00695 sucrose synthase [EC:2.4.1.13] (A)	Sucrose synthase 1 OS=Arabidopsis thaliana GN=SUS1 PE=1 SV=3	Glycosyl transferases group 1
BnaC03T0062400WE	-0.304761	0.256757	0.530443	0.109322	1.62566	0.0157938	GO:0005506	cytochrome P450 86A1-like; K15401 fatty acid omega-hydroxylase [EC:1.14.-.-] (A)	Cytochrome P450 86A1 OS=Arabidopsis thaliana GN=CYP86A1 PE=1 SV=2	Cytochrome P450
BnaC03T0076500WE	-0.898627	0.0253163	-0.0877251	0.141836	-1.05931	0.0469434	GO:0006491	glucosidase 2 subunit beta; K08288 protein kinase C substrate 80K-H (A)	Glucosidase 2 subunit beta OS=Arabidopsis thaliana GN=PSL4 PE=2 SV=1	Glucosidase II beta subunit-like protein
BnaC03T0083500WE	-0.25159	0.106421	-0.103322	0.149834	-0.704204	0.00773505	GO:0008152	dihydrolipoyllysine-residue succinyltransferase component of 2-oxoglutarate dehydrogenase complex 1, mitochondrial-like; K00658 2-oxoglutarate dehydrogenase E2 component (dihydrolipoamide succinyltransferase) [EC:2.3.1.61] (A)	Dihydrolipoyllysine-residue succinyltransferase component of 2-oxoglutarate dehydrogenase complex 1, mitochondrial OS=Arabidopsis thaliana GN=At5g55070 PE=2 SV=1	Biotin-requiring enzyme
BnaC03T0086700WE	-0.125609	0.224204	-0.684509	0.00311957	0.666696	0.0351345	GO:0010181	NAD(P)H dehydrogenase (quinone) FQR1-like; K03809 NAD(P)H dehydrogenase (quinone) [EC:1.6.5.2] (A)	NAD(P)H dehydrogenase (quinone) FQR1 OS=Arabidopsis thaliana GN=FQR1 PE=1 SV=1	NADPH-dependent FMN reductase
BnaC03T0102100WE	-0.43659	0.0807991	0.4129	0.0327788	0.772608	0.0424482	--	putative RNA-binding protein Luc7-like 2; K13212 RNA-binding protein Luc7-like 2 (A)	Luc7-like protein 3 OS=Pongo abelii GN=LUC7L3 PE=2 SV=1	LUC7 N_terminus
BnaC03T0108800WE	-1.10876	0.00514882	0.430397	0.137192	0.671156	0.02004	--	malonyl CoA-acyl carrier protein transacylase-like; K00645 [acyl-carrier-protein] S-malonyltransferase [EC:2.3.1.39] (A)	Malonyl-CoA-acyl carrier protein transacylase, mitochondrial OS=Mus musculus GN=Mcat PE=1 SV=3	Acyl transferase domain
BnaC03T0112000WE	0.0449923	0.319187	-0.327945	0.089048	-0.802002	0.0455724	GO:0005515	glutathione S-transferase F10; K00799 glutathione S-transferase [EC:2.5.1.18] (A)	Glutathione S-transferase F10 OS=Arabidopsis thaliana GN=GSTF10 PE=1 SV=3	Glutathione S-transferase, C-terminal domain
BnaC03T0139300WE	-0.291116	0.0358623	0.611981	0.00107202	0.606151	0.0113934	--	ubiquitin carboxyl-terminal hydrolase 9-like; K11855 ubiquitin carboxyl-terminal hydrolase 36/42 [EC:3.4.19.12] (A)	Casparian strip membrane protein 1 OS=Raphanus raphanistrum PE=2 SV=1	Domain of unknown function (DUF588)
BnaC03T0149000WE	-0.427766	0.198547	0.399572	0.0475699	-0.508795	0.0167813	GO:0008060	ADP-ribosylation factor GTPase-activating protein AGD7-like; K12492 ADP-ribosylation factor GTPase-activating protein 1 (A)	ADP-ribosylation factor GTPase-activating protein AGD7 OS=Arabidopsis thaliana GN=AGD7 PE=1 SV=1	Putative GTPase activating protein for Arf
BnaC03T0151600WE	-0.187657	0.0391601	0.352552	0.0103095	0.820559	0.0091049	GO:0005737	--	Protein VACUOLELESS1 OS=Arabidopsis thaliana GN=VCL1 PE=1 SV=1	Vps16, C-terminal region
BnaC03T0166500WE	-0.0360311	0.225079	0.231793	0.102211	0.770456	0.0246788	GO:0008270	LIM domain-containing protein WLIM2b; K09377 cysteine and glycine-rich protein (A)	LIM domain-containing protein WLIM2a OS=Arabidopsis thaliana GN=WLIN2A PE=1 SV=1	LIM domain
BnaC03T0177600WE	-0.725535	0.0463392	-0.635713	0.0466822	-0.942565	0.000495209	GO:0004601	peroxidase 25-like; K00430 peroxidase [EC:1.11.1.7] (A)	Peroxidase 25 OS=Arabidopsis thaliana GN=PER25 PE=2 SV=2	Peroxidase
BnaC03T0182400WE	-0.0627882	0.129676	0.17276	0.159198	1.0358	0.0232712	GO:0019904	1433-2; 14-3-3-like protein GF14 mu; K06630 14-3-3 protein epsilon (A)	14-3-3-like protein GF14 mu OS=Arabidopsis thaliana GN=GRF9 PE=1 SV=2	14-3-3 protein
BnaC03T0194200WE	1.00303	0.0503118	0.049237	0.21163	0.79288	0.0108273	GO:0005507	--	Uclacyanin-2 OS=Arabidopsis thaliana GN=At2g44790 PE=1 SV=1	Plastocyanin-like domain
BnaC03T0202100WE	0.566234	0.024967	-0.0365928	0.259214	0.720622	0.0320846	GO:0016021	mitochondrial inner membrane protein OXA1-like; K03217 YidC/Oxa1 family membrane protein insertase (A)	Mitochondrial inner membrane protein OXA1-like OS=Arabidopsis thaliana GN=OXA1L PE=2 SV=1	60Kd inner membrane protein
BnaC03T0208500WE	-0.86227	0.0369005	0.476765	0.118378	1.28947	0.0245186	GO:0008152	tropinone reductase homolog At2g29300-like; K08081 tropinone reductase I [EC:1.1.1.206] (A)	Tropinone reductase homolog At2g29300 OS=Arabidopsis thaliana GN=At2g29300 PE=2 SV=2	Enoyl-(Acyl carrier protein) reductase
BnaC03T0211000WE	-0.684526	0.0432465	0.347106	0.00614219	1.34871	0.00920825	GO:0004553	beta-galactosidase 12; K12309 beta-galactosidase [EC:3.2.1.23] (A)	Beta-galactosidase 8 OS=Arabidopsis thaliana GN=BGAL8 PE=2 SV=2	Galactose binding lectin domain
BnaC03T0211900WE	-0.79361	0.222077	-1.55381	0.0172894	-0.90823	0.00558486	GO:0003735	60S acidic ribosomal protein P2-1-like; K02943 large subunit ribosomal protein LP2 (A)	60S acidic ribosomal protein P2-1 OS=Arabidopsis thaliana GN=RPP2A PE=2 SV=2	60s Acidic ribosomal protein
BnaC03T0212500WE	0.894506	0.0271159	-1.56012	0.00418649	-1.31825	0.0144149	GO:0009055	ferredoxin, root R-B1-like; K02639 ferredoxin (A)	Ferredoxin-3, chloroplastic OS=Arabidopsis thaliana GN=FD3 PE=1 SV=1	2Fe-2S iron-sulfur cluster binding domain
BnaC03T0214700WE	-0.310183	0.0341015	0.657226	0.00939023	2.56361	0.0133103	--	inactive protein RESTRICTED TEV MOVEMENT 2-like; K13993 HSP20 family protein (A)	Inactive protein RESTRICTED TEV MOVEMENT 2 OS=Arabidopsis thaliana GN=RTM2 PE=3 SV=1	Hsp20/alpha crystallin family
BnaC03T0219500WE	0.56065	0.0274659	0.570205	0.0155236	1.19156	0.00194089	GO:0000287	tricyclene synthase, chloroplastic-like; K12467 myrcene/ocimene synthase [EC:4.2.3.15] (A)	Tricyclene synthase, chloroplastic OS=Arabidopsis thaliana GN=TPS10 PE=2 SV=1	Terpene synthase, N-terminal domain
BnaC03T0224200WE	0.0942189	0.171437	0.467213	0.0370273	0.775612	0.00559312	GO:0004733	pyridoxine/pyridoxamine 5'-phosphate oxidase 1, chloroplastic-like; K00275 pyridoxamine 5'-phosphate oxidase [EC:1.4.3.5] K17759 NAD(P)H-hydrate epimerase [EC:5.1.99.6] (A)	Pyridoxine/pyridoxamine 5'-phosphate oxidase 1, chloroplastic OS=Arabidopsis thaliana GN=PPOX1 PE=1 SV=1	Pyridoxine 5'-phosphate oxidase C-terminal dimerisation region
BnaC03T0225400WE	0.27407	0.101665	-0.279092	0.13646	1.24351	0.00965569	--	manganese-dependent ADP-ribose/CDP-alcohol diphosphatase; K01517 manganese-dependent ADP-ribose/CDP-alcohol diphosphatase [EC:3.6.1.13 3.6.1.16 3.6.1.53] (A)	High-affinity nitrate transporter 3.1 OS=Arabidopsis thaliana GN=NRT3.1 PE=1 SV=1	--
BnaC03T0231100WE	-0.690662	0.133393	0.0552167	0.377357	0.597075	0.0368061	--	nucleoporin SEH1-like; K14299 nucleoporin SEH1 (A)	Protein EXORDIUM OS=Arabidopsis thaliana GN=EXO PE=2 SV=1	Phosphate-induced protein 1 conserved region
BnaC03T0231200WE	-0.0262426	0.111424	-0.0931222	0.237301	-0.903943	0.00725939	GO:0019211	serine/threonine-protein phosphatase 2A activator-like; K17605 serine/threonine-protein phosphatase 2A activator (A)	Serine/threonine-protein phosphatase 2A activator OS=Bos taurus GN=PPP2R4 PE=2 SV=1	Phosphotyrosyl phosphate activator (PTPA) protein
BnaC03T0238900WE	0.159045	0.250059	0.0912245	0.34848	1.27786	0.0118133	GO:0005515	tetratricopeptide repeat domain containing protein; K19360 nephrocystin-3 (A)	Nephrocystin-3 OS=Xenopus laevis GN=nphp3 PE=2 SV=1	Tetratricopeptide repeat
BnaC03T0240400WE	-0.00597432	0.0757452	0.219427	0.0149661	1.21719	0.0187609	--	hypothetical protein; K00861 riboflavin kinase [EC:2.7.1.26] (A)	Reticulon-like protein B2 OS=Arabidopsis thaliana GN=RTNLB2 PE=1 SV=1	Reticulon
BnaC03T0244300WE	-0.487336	0.105471	0.406398	0.00307224	1.12043	0.0275016	GO:0005507	monocopper oxidase-like protein SKS1; K19791 iron transport multicopper oxidase (A)	Monocopper oxidase-like protein SKU5 OS=Arabidopsis thaliana GN=SKU5 PE=1 SV=1	Multicopper oxidase
BnaC03T0245600WE	-1.14272	0.0749708	0.662455	0.00591936	0.621617	0.0077628	GO:0003677	transcription initiation factor IIF subunit alpha-like; K03138 transcription initiation factor TFIIF subunit alpha (A)	Transcription initiation factor IIF subunit alpha OS=Arabidopsis thaliana GN=RAP74 PE=1 SV=1	Transcription initiation factor IIF, alpha subunit (TFIIF-alpha)
BnaC03T0254500WE	-0.179612	0.226839	-0.0147211	0.387156	0.886831	0.0136609	GO:0016491	gibberellin 2-beta-dioxygenase 2-like; K04125 gibberellin 2-oxidase [EC:1.14.11.13] (A)	Probable 2-oxoglutarate-dependent dioxygenase AOP1.2 OS=Arabidopsis thaliana GN=AOP1.2 PE=2 SV=1	non-haem dioxygenase in morphine synthesis N-terminal
BnaC03T0254800WE	-0.0766794	0.342327	0.221116	0.102599	1.21264	0.0092401	GO:0016491	gibberellin 2-beta-dioxygenase 8; K04125 gibberellin 2-oxidase [EC:1.14.11.13] (A)	Probable 2-oxoglutarate-dependent dioxygenase AOP1.2 OS=Arabidopsis thaliana GN=AOP1.2 PE=2 SV=1	non-haem dioxygenase in morphine synthesis N-terminal
BnaC03T0258900WE	-0.255404	0.0710334	-0.596538	0.00424395	-0.562001	0.0190473	--	uncharacterized protein OsI_027940-like; K15730 cytosolic prostaglandin-E synthase [EC:5.3.99.3] (A)	Uncharacterized protein OsI_027940 OS=Oryza sativa subsp. indica GN=OsI_027940 PE=1 SV=2	CS domain
BnaC03T0266200WE	0.190187	0.211238	-0.765131	0.0190896	-0.665367	0.0169541	GO:0003735	60S acidic ribosomal protein P1-2; K02942 large subunit ribosomal protein LP1 (A)	60S acidic ribosomal protein P1-2 OS=Arabidopsis thaliana GN=RPP1B PE=1 SV=2	60s Acidic ribosomal protein
BnaC03T0272900WE	-0.0238108	0.255947	-0.164501	0.107429	-0.604052	0.0162952	--	hypothetical protein; K14552 NET1-associated nuclear protein 1 (U3 small nucleolar RNA-associated protein 17) (A)	--	--
BnaC03T0273200WE	0.201341	0.0354029	0.959934	0.00482538	1.5636	0.0121951	--	uncharacterized LOC103421379; K17609 nucleoredoxin [EC:1.8.1.8] (A)	Protein SIEVE ELEMENT OCCLUSION A OS=Arabidopsis thaliana GN=SEOA PE=1 SV=1	Sieve element occlusion N-terminus
BnaC03T0277900WE	-0.0128473	0.229547	-0.37447	0.0124561	-0.611443	0.001976	GO:0005515	eukaryotic translation initiation factor 3 subunit M-like; K15030 translation initiation factor 3 subunit M (A)	Eukaryotic translation initiation factor 3 subunit M OS=Dictyostelium discoideum GN=eif3m PE=1 SV=1	PCI domain
BnaC03T0280400WE	0.115603	0.0794996	-0.0453492	0.232306	-0.792456	0.00200966	GO:0004812	histidine--tRNA ligase; K01892 histidyl-tRNA synthetase [EC:6.1.1.21] (A)	Histidine--tRNA ligase, cytoplasmic OS=Arabidopsis thaliana GN=At3g02760 PE=2 SV=1	Anticodon binding domain
BnaC03T0285500WE	0.529948	0.0685031	-0.158077	0.238068	-1.14699	0.0186882	GO:0003735	40S ribosomal protein S16-3-like; K02960 small subunit ribosomal protein S16e (A)	40S ribosomal protein S16-3 OS=Arabidopsis thaliana GN=RPS16C PE=2 SV=1	Ribosomal protein S9/S16
BnaC03T0287300WE	-0.225922	0.151135	-0.126047	0.108542	0.575972	0.00519282	GO:0003723	flowering locus K homology domain; K13162 poly(rC)-binding protein 2/3/4 (A)	Flowering locus K homology domain OS=Arabidopsis thaliana GN=FLK PE=1 SV=1	KH domain
BnaC03T0293600WE	-0.369502	0.0267041	-0.531145	0.0423543	0.754075	0.00434237	--	pectin acetylesterase 12-like; K19882 O-palmitoleoyl-L-serine hydrolase [EC:3.1.1.98] (A)	Pectin acetylesterase 12 OS=Arabidopsis thaliana GN=PAE12 PE=2 SV=1	Pectinacetylesterase
BnaC03T0296100WE	-0.155932	0.158644	-0.574615	0.00493664	-0.830274	0.00451762	GO:0005506	prolyl 4-hydroxylase 2; K00472 prolyl 4-hydroxylase [EC:1.14.11.2] (A)	Prolyl 4-hydroxylase 2 OS=Arabidopsis thaliana GN=P4H2 PE=1 SV=1	2OG-Fe(II) oxygenase superfamily
BnaC03T0302100WE	-0.4049	0.117662	0.397032	0.0286429	1.01611	0.0285437	GO:0004553	hypothetical protein; K19891 glucan endo-1,3-beta-glucosidase 1/2/3 [EC:3.2.1.39] (A)	Probable glucan endo-1,3-beta-glucosidase A6 OS=Arabidopsis thaliana GN=A6 PE=2 SV=1	X8 domain
BnaC03T0302500WE	0.443464	0.0127361	0.396137	0.176377	0.99417	0.0215598	--	--	Auxin-induced in root cultures protein 12 OS=Arabidopsis thaliana GN=AIR12 PE=1 SV=3	Protein of unknown function (DUF568)
BnaC03T0307500WE	0.363879	0.0182557	-0.128135	0.35825	1.65709	0.00977554	--	ankyrin repeat domain-containing protein 30A-like; K19748 RAB6-interacting golgin (A)	--	Transcriptional activator
BnaC03T0307800WE	2.29415	0.231934	-0.955126	0.00594721	-0.59044	0.0121677	GO:0005515	Ankyrin repeat, PH and SEC7 domain containing protein secG; K10335 ankyrin repeat and SOCS box protein 13 (A)	Ankyrin repeat domain-containing protein 1 OS=Oryctolagus cuniculus GN=ANKRD1 PE=2 SV=1	Ankyrin repeat
BnaC03T0314900WE	-0.258424	0.0433425	0.202678	0.0826948	1.11355	0.0011901	GO:0004185	serine carboxypeptidase-like 49; K16298 serine carboxypeptidase-like clade IV [EC:3.4.16.-] (A)	Serine carboxypeptidase-like 49 OS=Arabidopsis thaliana GN=SCPL49 PE=2 SV=2	Serine carboxypeptidase
BnaC03T0315800WE	0.907965	0.0259879	-0.393806	0.176506	-1.38347	0.00679313	GO:0016491	sulfite reductase [ferredoxin], chloroplastic-like; K00392 sulfite reductase (ferredoxin) [EC:1.8.7.1] (A)	Sulfite reductase [ferredoxin], chloroplastic OS=Arabidopsis thaliana GN=SIR PE=1 SV=1	Nitrite/Sulfite reductase ferredoxin-like half domain
BnaC03T0319600WE	0.0630044	0.332116	0.0823026	0.238296	-1.26529	0.0191408	GO:0005198	clathrin heavy chain 1-like; K04646 clathrin heavy chain (A)	Clathrin heavy chain 1 OS=Arabidopsis thaliana GN=CHC1 PE=1 SV=1	Clathrin, heavy-chain linker
BnaC03T0320500WE	0.147729	0.0576173	0.179918	0.224584	-1.17866	0.00327083	GO:0005515	SHOC2; soc-2 suppressor of clear homolog (C. elegans); K19613 leucine-rich repeat protein SHOC2 (A)	Plant intracellular Ras-group-related LRR protein 9 OS=Arabidopsis thaliana GN=PIRL9 PE=2 SV=1	Leucine Rich Repeat
BnaC03T0325100WE	-0.0822822	0.317026	0.170167	0.19603	0.706609	0.0183614	--	--	Uncharacterized protein C18orf8 OS=Homo sapiens GN=C18orf8 PE=2 SV=2	Colon cancer-associated protein Mic1-like
BnaC03T0326700WE	0.328295	0.119003	-0.749132	0.0985142	-1.23472	0.0287999	GO:0004568	endochitinase CH25-like; K01183 chitinase [EC:3.2.1.14] (A)	Endochitinase CH25 OS=Brassica napus PE=2 SV=1	Chitin recognition protein
BnaC03T0360700WE	-0.204083	0.224026	-0.165693	0.0958098	-1.10403	0.000123939	GO:0003676	DEAD-box ATP-dependent RNA helicase 51; K13179 ATP-dependent RNA helicase DDX18/HAS1 [EC:3.6.4.13] (A)	DEAD-box ATP-dependent RNA helicase 51 OS=Arabidopsis thaliana GN=RH51 PE=2 SV=1	Domain of unknown function (DUF4217)
BnaC03T0377500WE	1.25615	0.163752	0.17176	0.37937	1.03101	0.0022222	GO:0003824	4-coumarate--CoA ligase 4-like; K01904 4-coumarate--CoA ligase [EC:6.2.1.12] (A)	4-coumarate--CoA ligase 4 OS=Arabidopsis thaliana GN=4CL4 PE=1 SV=1	AMP-binding enzyme C-terminal domain
BnaC03T0429600WE	-0.305946	0.310802	-0.468357	0.00768695	0.895745	0.0121364	GO:0016998	GRMZM2G410991; uncharacterized LOC100384051; K13473 chitin elicitor-binding protein (A)	LysM domain-containing GPI-anchored protein 2 OS=Arabidopsis thaliana GN=LYM2 PE=1 SV=1	LysM domain
BnaC03T0444400WE	0.159961	0.213845	0.737697	0.100273	1.45622	0.0016276	GO:0006508	lysosomal Pro-X carboxypeptidase-like; K01285 lysosomal Pro-X carboxypeptidase [EC:3.4.16.2] (A)	Lysosomal Pro-X carboxypeptidase OS=Pongo abelii GN=PRCP PE=2 SV=1	Serine carboxypeptidase S28
BnaC03T0453500WE	0.238896	0.0103465	-0.441552	0.0243799	-0.87456	0.00143092	GO:0005509	POPTRDRAFT_654779; annexin-like protein RJ4; K17095 annexin A7/11 (A)	Annexin D2 OS=Arabidopsis thaliana GN=ANN2 PE=1 SV=1	Annexin
BnaC03T0458700WE	-0.0550125	0.0415044	-0.43046	0.0388204	1.09394	0.00889548	GO:0005515	clustered mitochondria protein homolog; K03255 protein TIF31 (A)	--	PB1 domain
BnaC03T0460400WE	-0.120449	0.0963286	-0.556533	0.131598	-1.31762	0.0163348	GO:0018580	hypothetical protein; K00459 nitronate monooxygenase [EC:1.13.12.16] (A)	Probable nitronate monooxygenase OS=Bacillus subtilis (strain 168) GN=yrpB PE=3 SV=1	Nitronate monooxygenase
BnaC03T0463900WE	-0.190662	0.0651401	0.387152	0.0209168	0.565288	0.0255583	GO:0016670	farnesylcysteine lyase-like; K05906 prenylcysteine oxidase / farnesylcysteine lyase [EC:1.8.3.5 1.8.3.6] (A)	Farnesylcysteine lyase OS=Arabidopsis thaliana GN=FLCY PE=1 SV=1	NAD(P)-binding Rossmann-like domain
BnaC03T0465100WE	-0.320668	0.309689	0.125679	0.237022	1.10627	0.0185682	GO:0004553	beta-galactosidase 12; K12309 beta-galactosidase [EC:3.2.1.23] (A)	Beta-galactosidase 10 OS=Arabidopsis thaliana GN=BGAL10 PE=2 SV=1	Glycosyl hydrolases family 35
BnaC03T0467600WE	0.266087	0.209587	0.880249	0.00418775	1.1161	0.00773947	GO:0016747	omega-hydroxypalmitate O-feruloyl transferase-like; K15400 omega-hydroxypalmitate O-feruloyl transferase [EC:2.3.1.188] (A)	Omega-hydroxypalmitate O-feruloyl transferase OS=Arabidopsis thaliana GN=HHT1 PE=1 SV=1	Transferase family
BnaC03T0486500WE	0.0501166	0.112596	-0.115654	0.257423	-0.991317	0.00552701	--	hypothetical protein; K04077 chaperonin GroEL (A)	RuBisCO large subunit-binding protein subunit alpha, chloroplastic OS=Brassica napus PE=2 SV=1	--
BnaC03T0487100WE	-0.0735895	0.269214	-0.556985	0.0352328	-0.625879	0.023567	GO:0005509	calnexin homolog 1-like; K08054 calnexin (A)	Calnexin homolog 1 OS=Arabidopsis thaliana GN=CNX1 PE=1 SV=1	Calreticulin family
BnaC03T0489600WE	0.0794793	0.36871	0.0972519	0.351428	-0.514622	0.020728	--	--	Molybdate-anion transporter OS=Homo sapiens GN=MFSD5 PE=1 SV=2	Sugar-tranasporters, 12 TM
BnaC03T0496200WE	-0.0900142	0.173621	0.317397	0.176524	0.953706	0.0447804	GO:0016021	--	Nicalin-1 OS=Danio rerio GN=ncl1 PE=2 SV=1	Nicastrin
BnaC03T0502800WE	0.088524	0.377752	0.115991	0.285137	-1.70725	0.00135601	GO:0006099	phosphoenolpyruvate carboxylase 1-like; K01595 phosphoenolpyruvate carboxylase [EC:4.1.1.31] (A)	Phosphoenolpyruvate carboxylase 3 OS=Arabidopsis thaliana GN=PPC3 PE=2 SV=2	Phosphoenolpyruvate carboxylase
BnaC03T0505800WE	0.0710359	0.143583	0.334851	0.233893	1.52212	0.0436668	GO:0016020	--	Protein FATTY ACID EXPORT 2, chloroplastic OS=Arabidopsis thaliana GN=FAX2 PE=2 SV=1	Transmembrane proteins 14C
BnaC03T0506300WE	-0.685303	0.0512142	-0.29788	0.128487	1.73079	0.00852643	GO:0005086	brefeldin A-inhibited guanine nucleotide-exchange protein 5; K13462 guanine nucleotide-exchange factor (A)	Brefeldin A-inhibited guanine nucleotide-exchange protein 5 OS=Arabidopsis thaliana GN=BIG5 PE=1 SV=2	Domain of unknown function (DUF1981)
BnaC03T0525300WE	0.0263475	0.124897	0.201868	0.279407	0.836165	0.00613628	GO:0004672	receptor-like protein kinase HERK 1; K04730 interleukin-1 receptor-associated kinase 1 [EC:2.7.11.1] (A)	Receptor-like protein kinase HERK 1 OS=Arabidopsis thaliana GN=HERK1 PE=1 SV=1	Protein tyrosine kinase
BnaC03T0536000WE	-0.0225699	0.274986	-0.0609697	0.214658	0.563875	0.0421496	GO:0000166	ATP-binding cassette sub-family A member 5-like; K05648 ATP-binding cassette, subfamily A (ABC1), member 5 (A)	ABC transporter A family member 2 OS=Arabidopsis thaliana GN=ABCA2 PE=2 SV=1	ABC-2 family transporter protein
BnaC03T0550200WE	-0.406291	0.0413505	0.488116	0.0658577	-0.660886	0.00931967	GO:0005524	T-complex protein 1 subunit epsilon; K09497 T-complex protein 1 subunit epsilon (A)	T-complex protein 1 subunit epsilon OS=Arabidopsis thaliana GN=CCT5 PE=1 SV=1	TCP-1/cpn60 chaperonin family
BnaC03T0570600WE	-0.498624	0.124973	0.411603	0.0902962	0.510426	0.0426552	GO:0008168	--	--	Putative S-adenosyl-L-methionine-dependent methyltransferase
BnaC03T0574800WE	-0.0524264	0.217195	0.655387	0.0365326	1.24717	0.00949553	GO:0016020	uncharacterized LOC105650086; K15601 lysine-specific demethylase 3 [EC:1.14.11.-] (A)	CSC1-like protein ERD4 OS=Brassica juncea GN=ERD4 PE=3 SV=2	Cytosolic domain of 10TM putative phosphate transporter
BnaC03T0578000WE	0.143607	0.0331469	0.239251	0.0181147	1.11497	0.042147	GO:0008158	Niemann-Pick C1 protein; K12385 Niemann-Pick C1 protein (A)	Niemann-Pick C1 protein OS=Sus scrofa GN=NPC1 PE=2 SV=1	Sterol-sensing domain of SREBP cleavage-activation
BnaC03T0578100WE	0.0328453	0.370452	-0.587602	0.0269333	-1.00023	0.0386113	GO:0006855	alpha/beta-hydrolase; K01054 acylglycerol lipase [EC:3.1.1.23] (A)	MATE efflux family protein 3, chloroplastic OS=Arabidopsis thaliana GN=DTX45 PE=2 SV=2	Histidine phosphatase superfamily (branch 1)
BnaC03T0578900WE	-0.533129	0.0260169	0.305162	0.104552	0.985692	0.0212408	GO:0004842	E3 ubiquitin-protein ligase UPL3-like; K10590 E3 ubiquitin-protein ligase TRIP12 [EC:2.3.2.26] (A)	E3 ubiquitin-protein ligase UPL3 OS=Arabidopsis thaliana GN=UPL3 PE=1 SV=1	HECT-domain (ubiquitin-transferase)
BnaC03T0600200WE	-0.671599	0.0460625	-0.0862153	0.0148869	0.739128	0.00384029	GO:0009987	probable Xaa-Pro aminopeptidase P; K01262 Xaa-Pro aminopeptidase [EC:3.4.11.9] (A)	Probable Xaa-Pro aminopeptidase P OS=Sordaria macrospora (strain ATCC MYA-333 / DSM 997 / K(L3346) / K-hell) GN=AMPP PE=3 SV=1	Creatinase/Prolidase N-terminal domain
BnaC03T0627700WE	0.0789194	0.34991	0.171251	0.367101	0.859702	0.0184717	GO:0005634	splicing factor 3B subunit 2-like; K12829 splicing factor 3B subunit 2 (A)	Splicing factor 3B subunit 2 OS=Homo sapiens GN=SF3B2 PE=1 SV=2	PSP
BnaC03T0631600WE	0.395318	0.0381741	-0.338764	0.296658	-1.21802	0.0375595	GO:0005515	FAM10 family protein At4g22670-like; K09560 suppressor of tumorigenicity protein 13 (A)	FAM10 family protein At4g22670 OS=Arabidopsis thaliana GN=At4g22670 PE=1 SV=1	Tetratricopeptide repeat
BnaC03T0635400WE	0.320677	0.0326794	0.537139	0.0148466	0.912417	0.00956054	GO:0009058	cystine lyase CORI3-like; K00815 tyrosine aminotransferase [EC:2.6.1.5] (A)	Probable aminotransferase TAT4 OS=Arabidopsis thaliana GN=At4g23590 PE=2 SV=1	Aminotransferase class I and II
BnaC03T0636100WE	0.0944902	0.0389807	0.246162	0.011604	0.800858	0.0247861	GO:0009058	cystine lyase CORI3-like; K00815 tyrosine aminotransferase [EC:2.6.1.5] (A)	Probable aminotransferase TAT4 OS=Arabidopsis thaliana GN=At4g23590 PE=2 SV=1	Aminotransferase class I and II
BnaC03T0683800WE	-0.0373538	0.294206	0.616879	0.0411953	-0.61272	0.00748823	GO:0004221	ubiquitin carboxyl-terminal hydrolase 6; K11843 ubiquitin carboxyl-terminal hydrolase 14 [EC:3.4.19.12] (A)	Ubiquitin carboxyl-terminal hydrolase 6 OS=Arabidopsis thaliana GN=UBP6 PE=1 SV=1	Ubiquitin family
BnaC03T0699800WE	0.105606	0.0681878	-0.140907	0.215881	0.502667	0.00399151	GO:0008152	aldehyde dehydrogenase family 7 member A1; K14085 aldehyde dehydrogenase family 7 member A1 [EC:1.2.1.31 1.2.1.8 1.2.1.3] (A)	Aldehyde dehydrogenase family 7 member A1 OS=Brassica napus GN=BTG-26 PE=1 SV=3	Aldehyde dehydrogenase family
BnaC03T0706500WE	0.950778	0.0231341	0.631011	0.0156394	2.44402	0.00772614	--	--	Pathogen-related protein OS=Hordeum vulgare PE=2 SV=2	--
BnaC04T0000300WE	-0.148411	0.119003	0.191364	0.0781863	0.620883	0.00898113	--	sister-chromatid cohesion protein 3; K06671 cohesin complex subunit SA-1/2 (A)	Sister-chromatid cohesion protein 3 OS=Arabidopsis thaliana GN=SCC3 PE=1 SV=2	STAG domain
BnaC04T0004000WE	0.0420564	0.0666989	0.46514	0.0898574	1.50092	0.0299477	GO:0003777	kinesin-4-like; K10406 kinesin family member C2/C3 (A)	Kinesin-4 OS=Arabidopsis thaliana GN=ATK4 PE=1 SV=2	Calponin homology (CH) domain
BnaC04T0009400WE	-0.534695	0.138315	0.182103	0.0819298	1.06707	0.0154841	--	pectin acetylesterase 3-like; K19882 O-palmitoleoyl-L-serine hydrolase [EC:3.1.1.98] (A)	Pectin acetylesterase 3 OS=Arabidopsis thaliana GN=PAE3 PE=2 SV=1	Pectinacetylesterase
BnaC04T0010900WE	0.0108802	0.38313	0.0956414	0.321312	-0.579125	0.0193404	GO:0003824	sugar 1,4-lactone oxidase (EC:1.1.3.-); K00107 D-arabinono-1,4-lactone oxidase [EC:1.1.3.37] (A)	L-gulonolactone oxidase 2 OS=Arabidopsis thaliana GN=GULLO2 PE=1 SV=1	D-arabinono-1,4-lactone oxidase
BnaC04T0038900WE	0.41593	0.0263343	0.489435	0.00426168	0.528739	0.00659218	GO:0003861	3-isopropylmalate dehydratase small subunit 1-like; K01704 3-isopropylmalate/(R)-2-methylmalate dehydratase small subunit [EC:4.2.1.33 4.2.1.35] (A)	3-isopropylmalate dehydratase small subunit 1 OS=Arabidopsis thaliana GN=IPMI2 PE=1 SV=1	Aconitase C-terminal domain
BnaC04T0044500WE	0.236077	0.354696	-0.33757	0.0459845	-0.870109	0.0241121	GO:0003676	la-related protein 6B-like; K15191 La-related protein 7 (A)	La-related protein 6B OS=Arabidopsis thaliana GN=LARP6B PE=1 SV=2	La domain
BnaC04T0046100WE	0.238091	0.0106776	0.394216	0.0612204	1.10652	0.0113012	GO:0004489	methylenetetrahydrofolate reductase 2; K00297 methylenetetrahydrofolate reductase (NADPH) [EC:1.5.1.20] (A)	Methylenetetrahydrofolate reductase 2 OS=Arabidopsis thaliana GN=MTHFR2 PE=1 SV=2	Methylenetetrahydrofolate reductase
BnaC04T0053100WE	-0.367095	0.274097	-0.3396	0.047798	0.958054	0.03618	GO:0005507	NEFM, NEF3; neurofilament, medium polypeptide; K04573 neurofilament medium polypeptide (neurofilament 3) (A)	Uclacyanin-2 OS=Arabidopsis thaliana GN=At2g44790 PE=1 SV=1	Plastocyanin-like domain
BnaC04T0055400WE	-0.0846036	0.118498	-0.293136	0.0507502	-0.572751	0.0188714	GO:0003924	elongation factor G-2, mitochondrial; K02355 elongation factor G (A)	Elongation factor G-2, mitochondrial OS=Arabidopsis thaliana GN=MEFG2 PE=2 SV=1	Elongation factor Tu domain 2
BnaC04T0056500WE	-0.587834	0.045024	0.312738	0.103146	-0.896198	0.00419655	GO:0005515	ribosome biogenesis protein BOP1 homolog; K14824 ribosome biogenesis protein ERB1 (A)	Ribosome biogenesis protein BOP1 homolog OS=Chlamydomonas reinhardtii GN=CHLREDRAFT_111274 PE=3 SV=2	WD domain, G-beta repeat
BnaC04T0059300WE	-0.249994	0.157088	-0.460909	0.0216025	1.354	0.0119254	--	serine/threonine-protein phosphatase 2A 65 kDa regulatory subunit A beta isoform-like; K03456 serine/threonine-protein phosphatase 2A regulatory subunit A (A)	Fasciclin-like arabinogalactan protein 8 OS=Arabidopsis thaliana GN=FLA8 PE=1 SV=1	Fasciclin domain
BnaC04T0062100WE	0.0068975	0.180385	0.118971	0.321489	2.43623	0.0307791	--	--	Remorin OS=Arabidopsis thaliana GN=DBP PE=1 SV=1	Remorin, N-terminal region
BnaC04T0063200WE	-0.175739	0.20066	0.408422	0.0156105	0.973154	0.0173492	GO:0005215	aquaporin PIP1-2; K09872 aquaporin PIP (A)	Aquaporin PIP1-2 OS=Arabidopsis thaliana GN=PIP1-2 PE=1 SV=1	Major intrinsic protein
BnaC04T0069000WE	0.253587	0.0548095	-0.344615	0.0243731	-0.595642	0.00216305	GO:0005515	eukaryotic translation initiation factor 3 subunit F; K03249 translation initiation factor 3 subunit F (A)	Eukaryotic translation initiation factor 3 subunit F OS=Arabidopsis thaliana GN=TIF3F1 PE=1 SV=1	Maintenance of mitochondrial structure and function
BnaC04T0069500WE	-0.0773867	0.375489	0.0354155	0.161045	1.42734	0.00749776	--	coronatine-insensitive protein 1-like; K13463 coronatine-insensitive protein 1 (A)	Coronatine-insensitive protein 1 OS=Arabidopsis thaliana GN=COI1 PE=1 SV=1	--
BnaC04T0079100WE	-0.204996	0.0147461	-0.260358	0.243339	-1.93403	0.0361285	GO:0003756	endoplasmic reticulum oxidoreductin-2; K10950 ERO1-like protein alpha [EC:1.8.4.-] (A)	Endoplasmic reticulum oxidoreductin-2 OS=Arabidopsis thaliana GN=AERO2 PE=1 SV=1	Endoplasmic Reticulum Oxidoreductin 1 (ERO1)
BnaC04T0096000WE	0.484811	0.0420347	0.0482846	0.365735	0.842063	0.0317218	GO:0009058	PAL1-2; phenylalanine ammonia-lyase 1-like; K10775 phenylalanine ammonia-lyase [EC:4.3.1.24] (A)	Phenylalanine ammonia-lyase 1 OS=Arabidopsis thaliana GN=PAL1 PE=1 SV=3	Aromatic amino acid lyase
BnaC04T0107300WE	0.482169	0.03236	0.413158	0.0439733	1.28858	0.0492706	--	--	Protein WAVE-DAMPENED 2 OS=Arabidopsis thaliana GN=WVD2 PE=2 SV=1	Targeting protein for Xklp2 (TPX2)
BnaC04T0112100WE	0.259679	0.175895	-0.233067	0.0974007	1.18296	0.0120421	GO:0005198	uncharacterized LOC106373525; K17893 ubiquinol oxidase [EC:1.10.3.11] (A)	Plastid lipid-associated protein 3, chloroplastic OS=Brassica campestris GN=PAP3 PE=2 SV=1	PAP_fibrillin
BnaC04T0118400WE	-0.353065	0.0608436	0.578802	0.0148992	1.1392	0.00507206	--	protein NAP1; K05750 NCK-associated protein 1 (A)	Protein NAP1 OS=Arabidopsis thaliana GN=NAP1 PE=1 SV=2	Membrane-associated apoptosis protein
BnaC04T0148200WE	-0.0865353	0.199372	-1.02483	0.00186042	-0.526656	0.0195505	--	--	--	--
BnaC04T0149500WE	-0.131037	0.33268	-0.271654	0.0242696	-0.542396	0.00244486	GO:0003735	probable CCR4-associated factor 1 homolog 7; K12581 CCR4-NOT transcription complex subunit 7/8 (A)	Probable CCR4-associated factor 1 homolog 7 OS=Arabidopsis thaliana GN=CAF1-7 PE=2 SV=2	Ribosomal protein L7Ae/L30e/S12e/Gadd45 family
BnaC04T0160500WE	-0.493233	0.0836817	-0.292085	0.275596	0.821116	0.0153484	GO:0003677	poly [ADP-ribose] polymerase 1-like; K10798 poly [ADP-ribose] polymerase [EC:2.4.2.30] (A)	Poly [ADP-ribose] polymerase 1 OS=Arabidopsis thaliana GN=PARP1 PE=1 SV=2	BRCA1 C Terminus (BRCT) domain
BnaC04T0165800WE	-0.680001	0.16969	-0.23674	0.0726838	1.94243	0.00984879	--	--	--	--
BnaC04T0167200WE	-0.31937	0.0363817	0.0592433	0.387974	1.3658	0.0292674	GO:0000786	histone H1.2-like; K11275 histone H1/5 (A)	Histone H1.2 OS=Arabidopsis thaliana GN=At2g30620 PE=1 SV=1	linker histone H1 and H5 family
BnaC04T0171700WE	-1.42077	0.127094	-4.49319	0.254998	2.42718	0.0154568	GO:0005507	laccase-3; K05909 laccase [EC:1.10.3.2] (A)	Laccase-3 OS=Arabidopsis thaliana GN=LAC3 PE=2 SV=2	Multicopper oxidase
BnaC04T0187700WE	-2.94207	0.0383537	-0.498911	0.176252	1.7276	0.0147701	GO:0000786	histone H2B.3-like; K11252 histone H2B (A)	Histone H2B.3 OS=Arabidopsis thaliana GN=At2g28720 PE=1 SV=3	Core histone H2A/H2B/H3/H4
BnaC04T0201600WE	-0.105406	0.199687	-0.984882	0.00907986	-0.690245	0.0138146	GO:0003735	60S acidic ribosomal protein P2-2-like; K02943 large subunit ribosomal protein LP2 (A)	60S acidic ribosomal protein P2-1 OS=Arabidopsis thaliana GN=RPP2A PE=2 SV=2	60s Acidic ribosomal protein
BnaC04T0209600WE	0.0228478	0.310838	0.0554065	0.370929	0.729953	0.0185877	GO:0006508	hypothetical protein; K16292 KDEL-tailed cysteine endopeptidase [EC:3.4.22.-] (A)	Cysteine proteinase RD21a OS=Arabidopsis thaliana GN=RD21A PE=1 SV=1	Granulin
BnaC04T0210500WE	0.621591	0.0939692	0.69313	0.0353042	0.593167	0.0203023	--	THO complex subunit 5B-like; K13174 THO complex subunit 5 (A)	THO complex subunit 5B OS=Arabidopsis thaliana GN=THO5B PE=1 SV=1	Fms-interacting protein
BnaC04T0212300WE	0.135856	0.287688	1.26103	0.0774068	0.918193	0.00694389	GO:0004553	Glucan endo-1,3-beta-glucosidase precursor, putative (EC:3.2.1.39); K19891 glucan endo-1,3-beta-glucosidase 1/2/3 [EC:3.2.1.39] (A)	Glucan endo-1,3-beta-glucosidase 7 OS=Arabidopsis thaliana GN=At4g34480 PE=1 SV=2	Glycosyl hydrolases family 17
BnaC04T0218800WE	-0.602299	0.159948	0.557849	0.0162613	1.73704	0.0211348	--	hypothetical protein; K01870 isoleucyl-tRNA synthetase [EC:6.1.1.5] (A)	Dirigent protein 19 OS=Arabidopsis thaliana GN=DIR19 PE=2 SV=1	Dirigent-like protein
BnaC04T0264100WE	-0.300656	0.00630756	0.519254	0.029566	1.2192	0.00622259	GO:0005515	hypothetical protein; K19938 rabphilin-3A (A)	Synaptotagmin-5 OS=Arabidopsis thaliana GN=SYT5 PE=2 SV=1	C2 domain
BnaC04T0264900WE	0.620835	0.0185016	0.15577	0.359899	0.828243	0.0225662	GO:0005086	brefeldin A-inhibited guanine nucleotide-exchange protein 2-like; K18442 brefeldin A-inhibited guanine nucleotide-exchange protein (A)	Brefeldin A-inhibited guanine nucleotide-exchange protein 2 OS=Arabidopsis thaliana GN=BIG2 PE=2 SV=1	Domain of unknown function (DUF1981)
BnaC04T0266600WE	-0.0635285	0.188193	-0.301429	0.0919987	-1.37776	0.0108214	GO:0003824	transketolase-1, chloroplastic-like; K00615 transketolase [EC:2.2.1.1] (A)	Transketolase-1, chloroplastic OS=Arabidopsis thaliana GN=TKL-1 PE=1 SV=1	Transketolase, C-terminal domain
BnaC04T0294400WE	0.0220427	0.382955	0.320023	0.0828272	0.879328	0.00387696	GO:0009058	SS2; strictosidine synthase 2; K01757 strictosidine synthase [EC:4.3.3.2] (A)	Protein STRICTOSIDINE SYNTHASE-LIKE 8 OS=Arabidopsis thaliana GN=SSL8 PE=2 SV=1	Strictosidine synthase
BnaC04T0302500WE	0.320306	0.0247441	0.0399241	0.250778	-0.583775	0.0317432	GO:0003743	eukaryotic translation initiation factor 3 subunit C-like; K03252 translation initiation factor 3 subunit C (A)	Eukaryotic translation initiation factor 3 subunit C OS=Arabidopsis thaliana GN=TIF3C1 PE=1 SV=2	PCI domain
BnaC04T0303200WE	0.193167	0.293054	0.00769784	0.213538	-0.580938	0.00932085	--	heat shock 70 kDa protein 15; K09489 heat shock 70kDa protein 4 (A)	Heat shock 70 kDa protein 15 OS=Arabidopsis thaliana GN=HSP70-15 PE=1 SV=1	Hsp70 protein
BnaC04T0306500WE	0.118266	0.0835131	-0.293236	0.0208189	-0.737101	0.0128709	GO:0004807	triosephosphate isomerase, cytosolic-like; K01803 triosephosphate isomerase (TIM) [EC:5.3.1.1] (A)	Triosephosphate isomerase, cytosolic OS=Arabidopsis thaliana GN=CTIMC PE=1 SV=2	Triosephosphate isomerase
BnaC04T0311400WE	0.11114	0.212744	-0.511044	0.110196	0.796996	0.0279451	--	uncharacterized LOC104415567; K17398 DNA (cytosine-5)-methyltransferase 3A [EC:2.1.1.37] (A)	Serine/threonine-protein kinase ATM OS=Arabidopsis thaliana GN=ATM PE=2 SV=1	--
BnaC04T0331000WE	-0.364835	0.0983087	0.423905	0.0563697	0.764073	0.0324855	GO:0004190	Eukaryotic aspartyl protease family protein isoform 1; K00924 [EC:2.7.1.-] (A)	Aspartic proteinase nepenthesin-2 OS=Nepenthes gracilis GN=nep2 PE=1 SV=1	Xylanase inhibitor N-terminal
BnaC04T0334000WE	-0.258312	0.137817	-0.179569	0.203324	-0.621293	0.0173422	GO:0005515	clustered mitochondria protein-like; K03255 protein TIF31 (A)	Clustered mitochondria protein OS=Arabidopsis thaliana GN=FMT PE=2 SV=1	Protein of unknown function (DUF727)
BnaC04T0344300WE	0.546038	0.0175213	0.324522	0.180605	-0.740423	0.0151348	GO:0000049	probable methionine--tRNA ligase; K01874 methionyl-tRNA synthetase [EC:6.1.1.10] (A)	Methionine--tRNA ligase, cytoplasmic OS=Arabidopsis thaliana GN=At4g13780 PE=2 SV=1	Putative tRNA binding domain
BnaC04T0344400WE	-0.271892	0.382347	0.881618	0.0975028	1.54752	0.0171107	GO:0005506	cytochrome P450 83A1; K12156 cytochrome P450, family 83, subfamily A, polypeptide 1 [EC:1.14.-.-] (A)	Cytochrome P450 83A1 OS=Arabidopsis thaliana GN=CYP83A1 PE=1 SV=2	Cytochrome P450
BnaC04T0344600WE	-0.544335	0.140718	-0.624482	0.00471102	-0.941111	0.00369432	GO:0016787	inosine triphosphate pyrophosphatase; K01519 inosine triphosphate pyrophosphatase [EC:3.6.1.19] (A)	Inosine triphosphate pyrophosphatase OS=Arabidopsis thaliana GN=At4g13720 PE=2 SV=1	Ham1 family
BnaC04T0354200WE	-0.824704	0.125458	-0.990494	0.0174195	-1.11609	0.00372735	GO:0003723	eukaryotic translation initiation factor isoform 4E-like; K03259 translation initiation factor 4E (A)	Eukaryotic translation initiation factor isoform 4E OS=Arabidopsis thaliana GN=EIF(ISO)4E PE=1 SV=2	Eukaryotic initiation factor 4E
BnaC04T0356500WE	-0.515876	0.32454	-1.18076	0.019771	-1.7009	0.00324577	--	cysteine--tRNA ligase 2, cytoplasmic; K01883 cysteinyl-tRNA synthetase [EC:6.1.1.16] (A)	Cysteine--tRNA ligase 2, cytoplasmic OS=Arabidopsis thaliana GN=At5g38830 PE=2 SV=1	tRNA synthetases class I (C) catalytic domain
BnaC04T0362700WE	0.169919	0.158792	0.165626	0.23346	0.717843	0.0496715	GO:0003676	THO complex subunit 4D-like; K12881 THO complex subunit 4 (A)	THO complex subunit 4D OS=Arabidopsis thaliana GN=ALY4 PE=1 SV=1	RNA recognition motif. (a.k.a. RRM, RBD, or RNP domain)
BnaC04T0375200WE	0.269012	0.107581	0.486203	0.0639852	0.732081	0.00978345	GO:0008270	putative thioredoxin H10; K03671 thioredoxin 1 (A)	Putative thioredoxin H10 OS=Arabidopsis thaliana GN=At3g56420 PE=3 SV=2	Alcohol dehydrogenase GroES-like domain
BnaC04T0384700WE	-0.214836	0.0662786	0.00603573	0.176193	0.760928	0.0116031	--	--	AIG2-like protein OS=Arabidopsis thaliana GN=At5g39720 PE=1 SV=1	Gamma-glutamyl cyclotransferase, AIG2-like
BnaC04T0400000WE	0.197666	0.0750764	0.116265	0.36715	0.512507	0.027102	GO:0016747	omega-hydroxypalmitate O-feruloyl transferase-like; K15400 omega-hydroxypalmitate O-feruloyl transferase [EC:2.3.1.188] (A)	Omega-hydroxypalmitate O-feruloyl transferase OS=Arabidopsis thaliana GN=HHT1 PE=1 SV=1	Transferase family
BnaC04T0404700WE	1.5484	0.00239504	0.140328	0.280848	-1.66664	0.00506828	GO:0004616	6-phosphogluconate dehydrogenase, decarboxylating 2, chloroplastic; K00033 6-phosphogluconate dehydrogenase [EC:1.1.1.44 1.1.1.343] (A)	6-phosphogluconate dehydrogenase, decarboxylating 2, chloroplastic OS=Arabidopsis thaliana GN=At5g41670 PE=1 SV=1	NAD binding domain of 6-phosphogluconate dehydrogenase
BnaC04T0408600WE	0.132819	0.0867788	-0.694773	0.0189501	-0.699708	0.00817363	GO:0003743	eukaryotic translation initiation factor 3 subunit J-like; K03245 translation initiation factor 3 subunit J (A)	Eukaryotic translation initiation factor 3 subunit J OS=Drosophila erecta GN=Adam PE=3 SV=1	Translation initiation factor eIF3 subunit
BnaC04T0409500WE	-0.556136	0.0563915	-0.422054	0.123277	1.05287	0.024357	GO:0005509	calcium-binding protein CML24-like; K13448 calcium-binding protein CML (A)	Calcium-binding protein CML24 OS=Arabidopsis thaliana GN=CML24 PE=2 SV=2	EF-hand domain pair
BnaC04T0410700WE	-0.14698	0.0320792	0.500885	0.00343851	0.862209	0.00381284	GO:0000162	tryptophan synthase beta chain 2-like; K06001 tryptophan synthase beta chain [EC:4.2.1.20] (A)	Tryptophan synthase beta chain 2 OS=Aquifex aeolicus (strain VF5) GN=trpB2 PE=3 SV=1	Pyridoxal-phosphate dependent enzyme
BnaC04T0425000WE	-0.00458575	0.31631	0.333104	0.0133644	0.669182	0.00382848	GO:0009058	bifunctional aspartate aminotransferase and glutamate/aspartate-prephenate aminotransferase-like; K15849 bifunctional aspartate aminotransferase and glutamate/aspartate-prephenate aminotransferase [EC:2.6.1.1 2.6.1.78 2.6.1.79] (A)	Bifunctional aspartate aminotransferase and glutamate/aspartate-prephenate aminotransferase OS=Arabidopsis thaliana GN=PAT PE=1 SV=2	Aminotransferase class I and II
BnaC04T0443600WE	-0.0885083	0.159733	0.337959	0.0422624	0.834956	0.0120582	GO:0005507	aspartate aminotransferase, cytoplasmic isozyme 2; K14454 aspartate aminotransferase, cytoplasmic [EC:2.6.1.1] (A)	Aspartate aminotransferase, cytoplasmic isozyme 2 OS=Arabidopsis thaliana GN=ASP4 PE=2 SV=2	Copper amine oxidase, enzyme domain
BnaC04T0444200WE	-0.411541	0.0396454	-0.244926	0.233215	-0.724898	0.00931603	GO:0004177	leucine aminopeptidase 1; K01255 leucyl aminopeptidase [EC:3.4.11.1] (A)	Leucine aminopeptidase 1 OS=Arabidopsis thaliana GN=PM25 PE=1 SV=1	Cytosol aminopeptidase family, N-terminal domain
BnaC04T0445900WE	0.151797	0.300547	0.155953	0.331072	0.521226	0.044576	--	--	Uncharacterized protein At2g24330 OS=Arabidopsis thaliana GN=At2g24330 PE=2 SV=1	Predicted integral membrane zinc-ribbon metal-binding protein
BnaC04T0448100WE	-0.239843	0.0863032	0.194507	0.128525	0.709397	0.00366304	GO:0016491	probable sarcosine oxidase; K00306 sarcosine oxidase / L-pipecolate oxidase [EC:1.5.3.1 1.5.3.7] (A)	Probable sarcosine oxidase OS=Arabidopsis thaliana GN=At2g24580 PE=2 SV=1	FAD dependent oxidoreductase
BnaC04T0454500WE	-0.11715	0.0706867	0.259096	0.0908538	0.622842	0.00192116	GO:0005543	clathrin assembly plant-like protein, putative; K20043 clathrin coat assembly protein AP180 (A)	Putative clathrin assembly protein At2g25430 OS=Arabidopsis thaliana GN=At2g25430 PE=1 SV=2	ANTH domain
BnaC04T0461000WE	0.0938915	0.13268	0.217073	0.0319276	0.582198	0.00850666	GO:0003824	hypothetical protein; K08726 soluble epoxide hydrolase / lipid-phosphate phosphatase [EC:3.3.2.10 3.1.3.76] (A)	Bifunctional epoxide hydrolase 2 OS=Sus scrofa GN=EPHX2 PE=2 SV=1	Alpha/beta hydrolase family
BnaC04T0462000WE	0.276412	0.052608	0.347894	0.00922802	0.70261	0.00292073	GO:0005515	protein argonaute 4-like; K11593 eukaryotic translation initiation factor 2C (A)	Protein argonaute 4 OS=Arabidopsis thaliana GN=AGO4 PE=1 SV=2	Argonaute linker 1 domain
BnaC04T0463100WE	-0.657849	0.265546	0.932036	0.0111168	2.21381	0.00912296	GO:0004252	peptidase, putative (EC:3.4.21.25); K18443 golgi-specific brefeldin A-resistance guanine nucleotide exchange factor 1 (A)	CO(2)-response secreted protease OS=Arabidopsis thaliana GN=CRSP PE=2 SV=1	PA domain
BnaC04T0463200WE	-0.490991	0.0197712	0.452492	0.0079743	0.88276	0.0176473	GO:0005515	structural maintenance of chromosomes protein 3; K06669 structural maintenance of chromosome 3 (chondroitin sulfate proteoglycan 6) (A)	Structural maintenance of chromosomes protein 3 OS=Arabidopsis thaliana GN=SMC3 PE=2 SV=1	SMC proteins Flexible Hinge Domain
BnaC04T0465400WE	0.815784	0.0598308	-0.353296	0.0491399	1.41402	0.00863656	GO:0009058	strictosidine synthase 1-like; K01757 strictosidine synthase [EC:4.3.3.2] (A)	Protein STRICTOSIDINE SYNTHASE-LIKE 9 OS=Arabidopsis thaliana GN=SSL9 PE=2 SV=1	Strictosidine synthase
BnaC04T0467900WE	0.106327	0.242274	-0.595325	0.0130311	-0.518307	0.00125916	GO:0003735	60S acidic ribosomal protein P2-2-like; K02943 large subunit ribosomal protein LP2 (A)	60S acidic ribosomal protein P2-1 OS=Arabidopsis thaliana GN=RPP2A PE=2 SV=2	60s Acidic ribosomal protein
BnaC04T0470100WE	0.344813	0.114118	-0.0392547	0.148472	0.790421	0.0351526	GO:0004560	alpha-L-fucosidase 1-like; K01206 alpha-L-fucosidase [EC:3.2.1.51] (A)	Alpha-L-fucosidase 1 OS=Arabidopsis thaliana GN=FUC1 PE=1 SV=2	Alpha-L-fucosidase
BnaC04T0475200WE	-0.431348	0.00164528	0.333694	0.0694429	1.64232	0.0101653	GO:0000786	histone H2B.3-like; K11252 histone H2B (A)	Histone H2B.3 OS=Arabidopsis thaliana GN=At2g28720 PE=1 SV=3	Core histone H2A/H2B/H3/H4
BnaC04T0489400WE	-0.400147	0.299698	0.157865	0.248973	1.15099	0.0165348	GO:0000786	histone H1.2-like; K11275 histone H1/5 (A)	Histone H1.2 OS=Arabidopsis thaliana GN=At2g30620 PE=1 SV=1	linker histone H1 and H5 family
BnaC04T0490100WE	0.111544	0.173797	0.137933	0.124167	0.736729	0.00573408	--	acyl-coenzyme A thioesterase 9, mitochondrial-like; K17361 acyl-coenzyme A thioesterase 9 [EC:3.1.2.-] (A)	Acyl-coenzyme A thioesterase 9, mitochondrial OS=Homo sapiens GN=ACOT9 PE=1 SV=2	--
BnaC04T0491100WE	0.535711	0.0175434	-0.284473	0.104596	-0.670009	0.0186593	GO:0016491	bx6; benzoxazin 6 (EC:1.14.20.2); K13229 2,4-dihydroxy-1,4-benzoxazin-3-one-glucoside dioxygenase [EC:1.14.20.2] (A)	Probable 2-oxoacid dependent dioxygenase OS=Arabidopsis thaliana GN=GSL-OH PE=2 SV=1	non-haem dioxygenase in morphine synthesis N-terminal
BnaC04T0491600WE	0.364443	0.00887722	-0.486463	0.037819	-1.09974	0.00173914	GO:0005515	glutathione S-transferase F9-like; K00799 glutathione S-transferase [EC:2.5.1.18] (A)	Glutathione S-transferase F9 OS=Arabidopsis thaliana GN=GSTF9 PE=1 SV=1	Glutathione S-transferase, N-terminal domain
BnaC04T0507200WE	-0.606141	0.0238627	0.428274	0.00535755	1.22668	0.0263696	GO:0004553	beta-galactosidase; K12309 beta-galactosidase [EC:3.2.1.23] (A)	Beta-galactosidase 9 OS=Arabidopsis thaliana GN=BGAL9 PE=2 SV=1	Galactose binding lectin domain
BnaC04T0515300WE	-0.0687872	0.198725	0.43445	0.151973	1.05107	0.00818141	--	uncharacterized protein At4g28440; K07466 replication factor A1 (A)	Uncharacterized protein At4g28440 OS=Arabidopsis thaliana GN=At4g28440 PE=1 SV=1	--
BnaC04T0520600WE	-0.0314896	0.255712	0.535261	0.0491097	1.0595	0.00165513	--	--	--	Domain of unknown function (DUF1338)
BnaC04T0521000WE	-0.492321	0.0458025	0.914355	0.00726474	2.27158	0.0316992	GO:0003824	cysteine desulfurase, mitochondrial precursor; K04487 cysteine desulfurase [EC:2.8.1.7] (A)	Tetrahydrocannabinolic acid synthase OS=Cannabis sativa PE=1 SV=1	Berberine and berberine like
BnaC04T0530700WE	0.0484006	0.157737	0.101772	0.366358	-0.631908	0.0155161	GO:0003924	elongation factor 2-like; K03234 elongation factor 2 (A)	Elongation factor 2 OS=Beta vulgaris PE=2 SV=1	Elongation Factor G, domain II
BnaC04T0536000WE	0.824919	0.0743047	-1.30046	0.0371473	-1.02233	0.0386045	GO:0000015	bifunctional enolase 2/transcriptional activator; K01689 enolase [EC:4.2.1.11] (A)	Bifunctional enolase 2/transcriptional activator OS=Arabidopsis thaliana GN=ENO2 PE=1 SV=1	Enolase, N-terminal domain
BnaC04T0544100WE	0.360896	0.109367	-0.674375	0.0151655	1.06475	0.0119048	GO:0006869	--	Lipid transfer-like protein VAS OS=Arabidopsis thaliana GN=VAS PE=2 SV=1	Probable lipid transfer
BnaC04T0548600WE	0.152108	0.120188	0.0191057	0.357916	1.91737	0.0276535	GO:0016757	probable galacturonosyltransferase 7; K13648 alpha-1,4-galacturonosyltransferase [EC:2.4.1.43] (A)	Probable galacturonosyltransferase 7 OS=Arabidopsis thaliana GN=GAUT7 PE=1 SV=2	Glycosyl transferase family 8
BnaC04T0555200WE	-0.324506	0.24469	0.0871443	0.200824	1.07005	0.00172545	GO:0005515	E3 ubiquitin-protein ligase HOS1-like; K16278 E3 ubiquitin-protein ligase HOS1 [EC:2.3.2.27] (A)	E3 ubiquitin-protein ligase HOS1 OS=Arabidopsis thaliana GN=HOS1 PE=1 SV=1	Nuclear pore complex assembly
BnaC04T0555700WE	0.262664	0.284939	0.221112	0.166063	-0.573946	0.00364424	GO:0005787	probable signal peptidase complex subunit 2; K12947 signal peptidase complex subunit 2 [EC:3.4.-.-] (A)	Probable signal peptidase complex subunit 2 OS=Arabidopsis thaliana GN=At2g39960 PE=2 SV=1	Microsomal signal peptidase 25 kDa subunit (SPC25)
BnaC04T0565900WE	0.24002	0.18047	0.245714	0.202566	0.960792	0.00859272	GO:0006537	ferredoxin-dependent glutamate synthase 2, chloroplastic-like; K00284 glutamate synthase (ferredoxin) [EC:1.4.7.1] (A)	Ferredoxin-dependent glutamate synthase 2, chloroplastic OS=Arabidopsis thaliana GN=GLU2 PE=1 SV=2	GXGXG motif
BnaC04T0568500WE	-0.0567024	0.141561	0.17132	0.13336	0.555182	0.0100195	GO:0005643	nuclear pore complex protein NUP93A; K14309 nuclear pore complex protein Nup93 (A)	Nuclear pore complex protein NUP93A OS=Arabidopsis thaliana GN=NUP93A PE=1 SV=2	Nup93/Nic96
BnaC04T0572300WE	-0.00948765	0.281976	0.67158	0.0546251	1.18595	0.0144604	GO:0005506	3,9-dihydroxypterocarpan 6A-monooxygenase-like; K00512 steroid 17alpha-monooxygenase / 17alpha-hydroxyprogesterone aldolase [EC:1.14.14.19 4.1.2.30] (A)	3,9-dihydroxypterocarpan 6A-monooxygenase OS=Glycine max GN=CYP93A1 PE=1 SV=1	Cytochrome P450
BnaC04T0592600WE	0.0984343	0.0538094	-0.0498578	0.361309	1.83367	0.0246919	--	--	Remorin OS=Arabidopsis thaliana GN=DBP PE=1 SV=1	Remorin, N-terminal region
BnaC04T0598500WE	-0.14935	0.150481	0.00554827	0.387553	0.624703	0.00483775	GO:0000166	ABC transporter B family member 4; K05658 ATP-binding cassette, subfamily B (MDR/TAP), member 1 [EC:3.6.3.44] (A)	ABC transporter B family member 4 OS=Arabidopsis thaliana GN=ABCB4 PE=1 SV=1	ABC transporter
BnaC05T0013300WE	0.496129	0.177495	-0.174766	0.118537	0.955248	0.0149903	GO:0000166	ABC transporter B family member 11-like; K05658 ATP-binding cassette, subfamily B (MDR/TAP), member 1 [EC:3.6.3.44] (A)	ABC transporter B family member 11 OS=Arabidopsis thaliana GN=ABCB11 PE=2 SV=1	ABC transporter transmembrane region
BnaC05T0015600WE	0.0584643	0.0490311	-0.885736	0.0387716	-0.958242	0.00074037	--	uncharacterized protein OsI_027940-like; K15730 cytosolic prostaglandin-E synthase [EC:5.3.99.3] (A)	Uncharacterized protein OsI_027940 OS=Oryza sativa subsp. indica GN=OsI_027940 PE=1 SV=2	CS domain
BnaC05T0032500WE	-0.0689757	0.324755	-0.263801	0.120396	-0.739885	0.00345926	GO:0006662	protein disulfide-isomerase like 2-2-like; K09584 protein disulfide-isomerase A6 [EC:5.3.4.1] (A)	Protein disulfide-isomerase like 2-2 OS=Arabidopsis thaliana GN=PDIL2-2 PE=2 SV=2	Thioredoxin
BnaC05T0036400WE	-0.0603952	0.227857	-0.114451	0.182289	-0.552211	0.00660772	GO:0003824	ubiquitin-like modifier-activating enzyme 5; K12164 ubiquitin-like modifier-activating enzyme 5 (A)	Ubiquitin-like modifier-activating enzyme 5 OS=Arabidopsis thaliana GN=At1g05350 PE=3 SV=2	ThiF family
BnaC05T0056900WE	0.805544	0.0899159	-0.309665	0.0218449	-0.938066	0.0222224	GO:0003735	neuroguidin; K14765 U3 small nucleolar ribonucleoprotein protein LCP5 (A)	Neuroguidin OS=Bos taurus GN=NGDN PE=2 SV=1	Sas10/Utp3/C1D family
BnaC05T0072000WE	-0.0526132	0.0663221	0.23719	0.0888056	0.755465	0.00134699	GO:0003924	ras-related protein RABA2a; K07904 Ras-related protein Rab-11A (A)	Ras-related protein RABA2a OS=Arabidopsis thaliana GN=RABA2A PE=2 SV=1	Ras family
BnaC05T0072100WE	-0.607471	0.0107124	-0.434933	0.12701	-0.82422	0.00571751	GO:0003746	probable elongation factor 1-gamma 1; K03233 elongation factor 1-gamma (A)	Probable elongation factor 1-gamma 1 OS=Arabidopsis thaliana GN=At1g09640 PE=2 SV=1	Glutathione S-transferase, C-terminal domain
BnaC05T0074700WE	-0.130291	0.108443	0.298047	0.0617551	1.14196	0.0124192	GO:0006508	hypothetical protein; K16292 KDEL-tailed cysteine endopeptidase [EC:3.4.22.-] (A)	Cysteine proteinase RD21a OS=Arabidopsis thaliana GN=RD21A PE=1 SV=1	Granulin
BnaC05T0089300WE	-0.752482	0.102781	0.139344	0.160803	0.673738	0.0411911	GO:0004553	probable xyloglucan endotransglucosylase/hydrolase protein 8; K08235 xyloglucan:xyloglucosyl transferase [EC:2.4.1.207] (A)	Probable xyloglucan endotransglucosylase/hydrolase protein 8 OS=Arabidopsis thaliana GN=XTH8 PE=2 SV=2	Xyloglucan endo-transglycosylase (XET) C-terminus
BnaC05T0094200WE	0.0820339	0.229059	0.378816	0.0557045	1.07354	0.0105924	GO:0005506	CYP71B28; cytochrome P450 71B28; K00517 [EC:1.14.-.-] (A)	Cytochrome P450 71B7 OS=Arabidopsis thaliana GN=CYP71B7 PE=1 SV=1	Cytochrome P450
BnaC05T0102400WE	0.0350143	0.359049	-0.0765121	0.201406	-0.662827	0.00249436	GO:0003872	pyrophosphate--fructose 6-phosphate 1-phosphotransferase subunit beta 1; K00895 pyrophosphate--fructose-6-phosphate 1-phosphotransferase [EC:2.7.1.90] (A)	Pyrophosphate--fructose 6-phosphate 1-phosphotransferase subunit beta 1 OS=Arabidopsis thaliana GN=PFP-BETA1 PE=1 SV=1	Phosphofructokinase
BnaC05T0114300WE	-0.0603973	0.359766	-0.0799125	0.379213	0.609442	0.00537462	GO:0005515	uncharacterized LOC105351367; K01869 leucyl-tRNA synthetase [EC:6.1.1.4] (A)	Plant UBX domain-containing protein 7 OS=Arabidopsis thaliana GN=PUX7 PE=1 SV=1	UBA-like domain
BnaC05T0117000WE	-1.07164	0.00268776	-0.288906	0.36416	1.04904	0.00356494	GO:0005643	nuclear pore complex protein Nup155-like; K14312 nuclear pore complex protein Nup155 (A)	Nuclear pore complex protein NUP155 OS=Arabidopsis thaliana GN=NUP155 PE=1 SV=1	Nup133 N terminal like
BnaC05T0121400WE	0.305395	0.0314991	0.441843	0.0293809	1.00524	0.0125861	GO:0000166	YALI0F17996p; K08712 ATP-binding cassette, subfamily G (WHITE), member 2, SNQ2 (A)	ABC transporter G family member 35 OS=Arabidopsis thaliana GN=ABCG35 PE=2 SV=1	ABC-transporter extracellular N-terminal
BnaC05T0132400WE	0.337642	0.050887	0.809326	0.00869116	0.989432	0.0151155	GO:0005506	CYP79F1, CYP79F2; dihomomethionine N-hydroxylase-like; K12154 cytochrome P450, family 79, subfamily F, polypeptide 1 [EC:1.14.13.-] (A)	Dihomomethionine N-hydroxylase OS=Arabidopsis thaliana GN=CYP79F1 PE=1 SV=1	Cytochrome P450
BnaC05T0141300WE	-0.558109	0.00552969	-0.715354	0.201096	-2.56124	0.0299796	GO:0009058	alanine aminotransferase 1, mitochondrial-like; K00814 alanine transaminase [EC:2.6.1.2] (A)	Alanine aminotransferase 2, mitochondrial OS=Arabidopsis thaliana GN=ALAAT2 PE=2 SV=1	Aminotransferase class I and II
BnaC05T0150600WE	0.467598	0.0305605	0.0665215	0.145973	-0.554651	0.00685119	GO:0008146	cytosolic sulfotransferase 16-like; K11821 desulfoglucosinolate sulfotransferase A/B/C [EC:2.8.2.-] (A)	Cytosolic sulfotransferase 17 OS=Arabidopsis thaliana GN=SOT17 PE=1 SV=1	Sulfotransferase domain
BnaC05T0159800WE	-0.924355	0.018081	0.292167	0.233499	-1.17731	0.0142664	--	leucoanthocyanidin reductase-like; K13081 leucoanthocyanidin reductase [EC:1.17.1.3] (A)	Isoflavone reductase homolog P3 OS=Arabidopsis thaliana GN=At1g75280 PE=2 SV=1	NmrA-like family
BnaC05T0163200WE	-0.0404499	0.112895	0.232007	0.13379	1.30106	0.0149629	GO:0005515	protein gar2; K14411 RNA-binding protein Musashi (A)	Protein IQ-DOMAIN 32 OS=Arabidopsis thaliana GN=IQD32 PE=1 SV=3	Protein of unknown function (DUF4005)
BnaC05T0168100WE	-0.165263	0.232595	0.702211	0.145261	-0.661563	0.0101855	GO:0004252	prolyl endopeptidase-like; K01322 prolyl oligopeptidase [EC:3.4.21.26] (A)	Prolyl endopeptidase OS=Homo sapiens GN=PREP PE=1 SV=2	Prolyl oligopeptidase family
BnaC05T0180300WE	-0.377688	0.030349	-0.151419	0.159241	0.580256	0.00376365	GO:0005509	SORBIDRAFT_10g030940, Sb10g030940; hypothetical protein; K12472 epidermal growth factor receptor substrate 15 (A)	EH domain-containing protein 1 OS=Arabidopsis thaliana GN=EHD1 PE=1 SV=1	EF hand
BnaC05T0188800WE	-0.075536	0.24034	0.206159	0.252555	1.39025	0.00159827	GO:0005215	POPTRDRAFT_738169; hypothetical protein; K19996 phosphatidylinositol transfer protein SFH5 (A)	Patellin-2 OS=Arabidopsis thaliana GN=PATL2 PE=1 SV=2	CRAL/TRIO, N-terminal domain
BnaC05T0189800WE	-0.169049	0.0449196	0.668407	0.0378978	1.39292	0.00826715	GO:0005515	rasal1; RAS protein activator like 1 (GAP1 like); K17632 RAS protein activator-like 1 (A)	Protein QUIRKY OS=Arabidopsis thaliana GN=QKY PE=2 SV=1	C2 domain
BnaC05T0192400WE	-0.105036	0.0924107	0.837428	0.0162764	1.74205	0.0417442	--	hypothetical protein; K01870 isoleucyl-tRNA synthetase [EC:6.1.1.5] (A)	Dirigent protein 2 OS=Arabidopsis thaliana GN=DIR2 PE=2 SV=1	Dirigent-like protein
BnaC05T0201200WE	0.3618	0.0150402	0.399259	0.106122	1.17301	0.0237924	GO:0005515	hypothetical protein; K02599 Notch (A)	--	NHL repeat
BnaC05T0206000WE	0.315693	0.1599	-0.0374921	0.279417	-0.787814	0.00576003	--	PRKAB2; protein kinase, AMP-activated, beta 2 non-catalytic subunit; K07199 5'-AMP-activated protein kinase, regulatory beta subunit (A)	5'-AMP-activated protein kinase subunit beta-2 OS=Rattus norvegicus GN=Prkab2 PE=1 SV=1	--
BnaC05T0215100WE	0.468471	0.107072	0.635879	0.023014	2.04798	0.00707123	GO:0006099	phosphoenolpyruvate carboxylase 4-like; K01595 phosphoenolpyruvate carboxylase [EC:4.1.1.31] (A)	Phosphoenolpyruvate carboxylase 4 OS=Arabidopsis thaliana GN=PPC4 PE=2 SV=1	Phosphoenolpyruvate carboxylase
BnaC05T0224900WE	-0.516257	0.171491	0.104008	0.0692704	-0.707034	0.0390568	GO:0005622	T23J18.22; K12669 oligosaccharyltransferase complex subunit gamma (A)	Nuclear transport factor 2 OS=Arabidopsis thaliana GN=NTF2 PE=1 SV=1	Nuclear transport factor 2 (NTF2) domain
BnaC05T0230900WE	-0.334092	0.179634	0.185401	0.144432	0.788733	0.0204653	GO:0000398	U4/U6 small nuclear ribonucleoprotein Prp3-like; K12843 U4/U6 small nuclear ribonucleoprotein PRP3 (A)	U4/U6 small nuclear ribonucleoprotein Prp3 OS=Gallus gallus GN=PRPF3 PE=2 SV=1	Protein of unknown function (DUF1115)
BnaC05T0238300WE	0.216119	0.248556	0.628464	0.218698	-0.9369	0.0162075	GO:0016747	spermidine coumaroyl CoA acyltransferase-like; K15400 omega-hydroxypalmitate O-feruloyl transferase [EC:2.3.1.188] (A)	Spermidine coumaroyl CoA acyltransferase OS=Arabidopsis thaliana GN=SCT PE=1 SV=1	Transferase family
BnaC05T0246500WE	-0.357243	0.000579344	-0.593072	0.0358747	-0.796863	0.0123	GO:0003746	elongation factor 1-delta 1-like; K03232 elongation factor 1-beta (A)	Elongation factor 1-delta 2 OS=Arabidopsis thaliana GN=At2g18110 PE=1 SV=1	EF-1 guanine nucleotide exchange domain
BnaC05T0255900WE	-1.69555	0.145131	-0.870606	0.0632446	1.60908	0.0441278	GO:0004601	peroxidase 7-like; K00430 peroxidase [EC:1.11.1.7] (A)	Peroxidase 7 OS=Arabidopsis thaliana GN=PER7 PE=2 SV=1	Peroxidase
BnaC05T0262800WE	-0.255628	0.335948	-0.951188	0.00981063	-1.53931	0.0044724	GO:0000062	acyl-CoA-binding protein; K08762 diazepam-binding inhibitor (GABA receptor modulator, acyl-CoA-binding protein) (A)	Acyl-CoA-binding protein OS=Brassica napus PE=3 SV=1	Acyl CoA binding protein
BnaC05T0297800WE	-0.383809	0.182017	-0.545836	0.0813869	0.998933	0.00571542	GO:0000785	HMG-Y-related protein A-like; K11275 histone H1/5 (A)	HMG-Y-related protein A OS=Glycine max PE=2 SV=1	linker histone H1 and H5 family
BnaC05T0298000WE	-0.405379	0.0241227	0.749116	0.00263387	1.93768	0.0190606	GO:0003677	T1N15.24; K01598 phosphopantothenoylcysteine decarboxylase [EC:4.1.1.36] (A)	Putative DNA-binding protein At1g48610 OS=Arabidopsis thaliana GN=At1g48610 PE=1 SV=1	AT hook motif
BnaC05T0299100WE	-0.0332145	0.364437	0.537055	0.0472862	0.73543	0.0128628	GO:0005515	protein argonaute 1-like; K11593 eukaryotic translation initiation factor 2C (A)	Protein argonaute 1A OS=Oryza sativa subsp. japonica GN=AGO1A PE=2 SV=1	Glycine-rich region of argonaut
BnaC05T0304600WE	0.220355	0.0193042	0.371288	0.0107227	0.904439	0.0153621	GO:0004030	aldehyde dehydrogenase family 3 member H1-like; K00128 aldehyde dehydrogenase (NAD+) [EC:1.2.1.3] (A)	Aldehyde dehydrogenase family 3 member H1 OS=Arabidopsis thaliana GN=ALDH3H1 PE=1 SV=2	Aldehyde dehydrogenase family
BnaC05T0345700WE	0.185369	0.122248	0.469418	0.00709493	1.61017	0.0130197	GO:0004601	peroxidase 30-like; K00430 peroxidase [EC:1.11.1.7] (A)	Peroxidase 30 OS=Arabidopsis thaliana GN=PER30 PE=1 SV=1	Peroxidase
[truncated: 1,034 more rows]

## Sheet: (B) Susceptible 1556
Table S1 B. Diffferentially abundant proteins in susceptible genotype. Sus = clubroot susceptible genotype,T = pathogen inoculated, C= uninoculated. the numbers 1, 4, and 7 indicate days post pathogen inoculation.	Table S1. Diffferentially abundant proteins in resistant genotype.	Table S1. Diffferentially abundant proteins in resistant genotype.	Table S1. Diffferentially abundant proteins in resistant genotype.	Table S1. Diffferentially abundant proteins in resistant genotype.	Table S1. Diffferentially abundant proteins in resistant genotype.	Table S1. Diffferentially abundant proteins in resistant genotype.	Table S1. Diffferentially abundant proteins in resistant genotype.	Table S1. Diffferentially abundant proteins in resistant genotype.	Table S1. Diffferentially abundant proteins in resistant genotype.	Table S1. Diffferentially abundant proteins in resistant genotype.	Table S1. Diffferentially abundant proteins in resistant genotype.	Table S1. Diffferentially abundant proteins in resistant genotype.	Table S1. Diffferentially abundant proteins in resistant genotype.	Table S1. Diffferentially abundant proteins in resistant genotype.	Table S1. Diffferentially abundant proteins in resistant genotype.	Table S1. Diffferentially abundant proteins in resistant genotype.	Table S1. Diffferentially abundant proteins in resistant genotype.	Table S1. Diffferentially abundant proteins in resistant genotype.	Table S1. Diffferentially abundant proteins in resistant genotype.	Table S1. Diffferentially abundant proteins in resistant genotype.	Table S1. Diffferentially abundant proteins in resistant genotype.	Table S1. Diffferentially abundant proteins in resistant genotype.	Table S1. Diffferentially abundant proteins in resistant genotype.	Table S1. Diffferentially abundant proteins in resistant genotype.	Table S1. Diffferentially abundant proteins in resistant genotype.	Table S1. Diffferentially abundant proteins in resistant genotype.	Table S1. Diffferentially abundant proteins in resistant genotype.	Table S1. Diffferentially abundant proteins in resistant genotype.	Table S1. Diffferentially abundant proteins in resistant genotype.	Table S1. Diffferentially abundant proteins in resistant genotype.	Table S1. Diffferentially abundant proteins in resistant genotype.	Table S1. Diffferentially abundant proteins in resistant genotype.	Table S1. Diffferentially abundant proteins in resistant genotype.	Table S1. Diffferentially abundant proteins in resistant genotype.	Table S1. Diffferentially abundant proteins in resistant genotype.	Table S1. Diffferentially abundant proteins in resistant genotype.	Table S1. Diffferentially abundant proteins in resistant genotype.	Table S1. Diffferentially abundant proteins in resistant genotype.	Table S1. Diffferentially abundant proteins in resistant genotype.	Table S1. Diffferentially abundant proteins in resistant genotype.	Table S1. Diffferentially abundant proteins in resistant genotype.	Table S1. Diffferentially abundant proteins in resistant genotype.	Table S1. Diffferentially abundant proteins in resistant genotype.	Table S1. Diffferentially abundant proteins in resistant genotype.	Table S1. Diffferentially abundant proteins in resistant genotype.	Table S1. Diffferentially abundant proteins in resistant genotype.	Table S1. Diffferentially abundant proteins in resistant genotype.	Table S1. Diffferentially abundant proteins in resistant genotype.	Table S1. Diffferentially abundant proteins in resistant genotype.
[truncated: 1,557 more rows]
[truncated: 5,000 more columns]

[truncated: 6 more sheets: (C)1 DPI Res, (D) 4 DPI Res, (E) 7 DPI Res, (F) 1 DPI Sus, (G) 4 DPI Sus, (H) 7 DPI Sus]
