# Supplementary material for: Proteome- and metabolome-level changes during early stages of clubroot infection in Brassica napus canola
Source: Royal Society of Chemistry journal article supplement (doi:10.1039/d3mo00210a), 2024-01-22
Supplement: d3mo00210a3.xlsx [file d3mo00210a3.xlsx]

## Sheet: (A) CR Biological Process
Table S2 A. Gene ontology (GO) categories related to biological process in clubroot resistant (CR) genotype.
Term	Genes	Count	P-Value	q-value
cellular process		1304	6.5e-09	4e-07
metabolic process		1143	0.0033	0.038
single-organism process		1037	6.9e-15	1.3e-12
single-organism cellular process		739	2.2e-28	1.4e-25
single-organism metabolic process		557	9.4e-31	1.5e-27
developmental process		487	0.004	0.044
response to stress		486	0.00022	0.0037
anatomical structure development		459	0.0013	0.017
cellular component organization or biogenesis		440	1.6e-16	4.7e-14
response to chemical		429	0.00023	0.0038
small molecule metabolic process		397	1.4e-32	4.4e-29
multicellular organism development		378	0.0041	0.044
cellular component organization		365	1.3e-13	2.1e-11
organonitrogen compound metabolic process		356	7.8e-16	2.1e-13
localization		312	6.2e-12	5.9e-10
organic acid metabolic process		297	7.1e-29	7.5e-26
oxoacid metabolic process		285	2.1e-28	1.4e-25
response to oxygen-containing compound		273	0.0042	0.045
single-organism biosynthetic process		266	5e-15	1.1e-12
catabolic process		263	1.9e-12	2.3e-10
establishment of localization		251	9.8e-08	4.1e-06
transport		248	6e-08	2.7e-06
carboxylic acid metabolic process		227	2.9e-24	1.5e-21
cellular component biogenesis		226	5.5e-10	3.9e-08
organic substance catabolic process		214	2.1e-09	1.3e-07
organonitrogen compound biosynthetic process		214	4.8e-06	0.00013
post-embryonic development		211	0.0041	0.044
organelle organization		204	2.9e-08	1.4e-06
cellular catabolic process		194	1.7e-09	1.1e-07
macromolecule localization		188	5.6e-17	1.8e-14
tissue development		169	0.0044	0.047
cellular localization		166	1.3e-18	4.4e-16
anatomical structure morphogenesis		156	0.0018	0.023
organic substance transport		153	1.2e-09	8.2e-08
carbohydrate metabolic process		150	1.1e-11	1e-09
protein localization		148	1.3e-13	2.1e-11
growth		148	0.00094	0.013
nitrogen compound transport		136	7.2e-11	5.7e-09
cell wall organization or biogenesis		131	8.4e-09	4.8e-07
carbohydrate derivative metabolic process		128	4.1e-10	3e-08
small molecule biosynthetic process		125	2.1e-10	1.6e-08
response to temperature stimulus		124	6.7e-05	0.0015
root system development		122	0.00015	0.0028
cellular macromolecule localization		121	2.4e-14	4.3e-12
cellular response to stress		121	0.0019	0.024
amide transport		120	9.9e-13	1.3e-10
root development		118	0.00041	0.0061
establishment of protein localization		117	2.6e-12	2.8e-10
peptide transport		117	3.2e-12	3.4e-10
protein transport		117	8.6e-13	1.2e-10
cellular component assembly		116	4.8e-05	0.0011
single-organism catabolic process		115	6e-15	1.3e-12
fruit development		113	0.003	0.035
cellular amino acid metabolic process		111	4.1e-19	1.9e-16
seed development		110	0.0018	0.022
cellular protein localization		109	1.9e-12	2.3e-10
establishment of localization in cell		107	5.6e-13	8.1e-11
secondary metabolic process		107	3.9e-10	2.9e-08
single-organism localization		106	0.00049	0.0071
intracellular transport		103	3.2e-13	4.8e-11
sulfur compound metabolic process		102	5.9e-12	5.8e-10
organic acid biosynthetic process		100	8.1e-12	7.6e-10
macromolecular complex subunit organization		100	2.5e-06	7.2e-05
carboxylic acid biosynthetic process		98	3.4e-12	3.5e-10
monocarboxylic acid metabolic process		98	1.5e-09	9.6e-08
single-organism transport		98	0.0015	0.019
alpha-amino acid metabolic process		88	1.2e-18	4.4e-16
response to oxidative stress		88	3.2e-07	1.2e-05
macromolecular complex assembly		87	4.3e-05	0.00098
intracellular protein transport		86	2e-12	2.3e-10
single-organism carbohydrate metabolic process		86	2.9e-08	1.4e-06
embryo development		78	0.00029	0.0048
organophosphate metabolic process		77	1.8e-06	5.6e-05
cell growth		75	0.00019	0.0034
response to cold		73	1.8e-05	0.00043
embryo development ending in seed dormancy		73	0.0003	0.0048
organonitrogen compound catabolic process		70	9e-08	3.8e-06
plant-type cell wall organization or biogenesis		69	2.5e-06	7.2e-05
cellular macromolecular complex assembly		69	1.1e-05	0.00027
nucleobase-containing small molecule metabolic process		68	4.8e-11	4.1e-09
polysaccharide metabolic process		65	5.8e-05	0.0013
secondary metabolite biosynthetic process		65	5.5e-11	4.4e-09
external encapsulating structure organization		64	0.0004	0.006
root morphogenesis		64	0.0055	0.057
cell wall biogenesis		62	2.5e-07	9.9e-06
cell wall organization		61	0.00021	0.0037
cellular carbohydrate metabolic process		61	3.4e-06	9.4e-05
nucleoside phosphate metabolic process		61	1.5e-10	1.2e-08
nucleotide metabolic process		61	5.1e-11	4.2e-09
vesicle-mediated transport		61	4.6e-05	0.001
carbohydrate derivative biosynthetic process		55	0.0029	0.034
generation of precursor metabolites and energy		53	4.4e-05	0.001
gametophyte development		53	0.0027	0.032
protein localization to organelle		52	1.1e-06	3.5e-05
sulfur compound biosynthetic process		52	1.4e-09	9.2e-08
cellular amino acid biosynthetic process		51	4.7e-15	1.1e-12
protein targeting		51	3.1e-09	1.9e-07
oxidation-reduction process		50	1.1e-08	6.2e-07
chromatin organization		50	0.0016	0.021
alpha-amino acid biosynthetic process		48	6.7e-15	1.3e-12
ribose phosphate metabolic process		48	1.3e-08	6.9e-07
single-organism organelle organization		48	0.00022	0.0037
carbohydrate biosynthetic process		47	0.002	0.025
small molecule catabolic process		47	2.9e-11	2.5e-09
plant-type cell wall biogenesis		46	7.8e-08	3.4e-06
establishment of protein localization to organelle		46	2.4e-08	1.3e-06
glycosyl compound metabolic process		45	0.00019	0.0034
protein folding		44	9.7e-13	1.3e-10
coenzyme metabolic process		43	6.8e-06	0.00017
response to heat		43	0.0019	0.023
single-organism cellular localization		42	1.3e-07	5.3e-06
fatty acid metabolic process		42	8.6e-05	0.0017
purine-containing compound metabolic process		41	1.9e-06	5.6e-05
cellular polysaccharide metabolic process		40	0.00022	0.0037
ribonucleotide metabolic process		40	1.1e-06	3.5e-05
monocarboxylic acid biosynthetic process		39	0.00059	0.0084
carbohydrate catabolic process		38	0.00012	0.0023
purine nucleotide metabolic process		38	1.4e-06	4.5e-05
purine ribonucleotide metabolic process		37	1.5e-06	4.8e-05
single-organism intracellular transport		37	6.5e-07	2.3e-05
nucleoside monophosphate metabolic process		36	9.6e-07	3.2e-05
reactive oxygen species metabolic process		36	8e-09	4.8e-07
nucleoside triphosphate metabolic process		35	2.9e-07	1.1e-05
ribonucleoside monophosphate metabolic process		35	1.6e-06	4.9e-05
energy derivation by oxidation of organic compounds		35	1.2e-08	6.5e-07
glucosinolate metabolic process		35	0.00031	0.0049
S-glycoside metabolic process		35	0.00031	0.0049
glycosinolate metabolic process		35	0.00031	0.0049
phenylpropanoid metabolic process		33	8.3e-09	4.8e-07
polysaccharide biosynthetic process		33	0.0024	0.029
purine nucleoside monophosphate metabolic process		33	2e-06	5.9e-05
purine ribonucleoside monophosphate metabolic process		33	2e-06	5.9e-05
ribonucleoside triphosphate metabolic process		33	7.1e-07	2.4e-05
cellular carbohydrate biosynthetic process		32	0.0014	0.018
cellular glucan metabolic process		32	0.0009	0.012
glucan metabolic process		32	0.0013	0.017
purine nucleoside triphosphate metabolic process		32	7.2e-07	2.5e-05
purine ribonucleoside triphosphate metabolic process		32	5e-07	1.9e-05
response to metal ion		32	0.00035	0.0054
cellular respiration		32	5.6e-08	2.5e-06

## Sheet: (B) CS Biological Process
Table S2 B. Gene ontology (GO) categories related to biological process in clubroot resistant (CS) genotype.
Term	Genes	Count	P-Value	q-value
cellular process		853	5.4e-05	0.0014
metabolic process		776	8.5e-05	0.0021
cellular metabolic process		678	0.0017	0.029
single-organism process		664	8.8e-07	3.6e-05
single-organism cellular process		481	2.4e-17	1.7e-14
single-organism metabolic process		381	2.4e-24	6.8e-21
developmental process		337	0.00072	0.014
anatomical structure development		321	0.00012	0.0028
cellular component organization or biogenesis		285	4.1e-10	5.8e-08
small molecule metabolic process		268	1.5e-23	2.1e-20
organonitrogen compound metabolic process		240	7.1e-12	1.3e-09
cellular component organization		225	2.5e-06	9.3e-05
single-organism biosynthetic process		201	8.8e-18	8.3e-15
catabolic process		192	3.5e-13	8.3e-11
organic acid metabolic process		188	2.8e-16	1.3e-13
localization		186	0.00011	0.0025
oxoacid metabolic process		181	4e-16	1.6e-13
organic substance catabolic process		156	5.2e-10	6.6e-08
cellular component biogenesis		154	5.5e-08	3.5e-06
establishment of localization		152	0.0021	0.034
transport		152	0.00087	0.016
carboxylic acid metabolic process		151	2.5e-16	1.3e-13
organonitrogen compound biosynthetic process		148	1.6e-05	0.00047
cellular catabolic process		140	1.6e-09	1.9e-07
tissue development		120	0.0016	0.027
carbohydrate metabolic process		118	3e-14	8.5e-12
macromolecule localization		103	1.4e-05	0.00043
cell wall organization or biogenesis		99	9.3e-10	1.1e-07
organic substance transport		93	7.6e-05	0.0019
cellular localization		90	2.7e-06	9.6e-05
small molecule biosynthetic process		90	1.8e-09	2e-07
carbohydrate derivative metabolic process		88	5.5e-08	3.5e-06
single-organism catabolic process		85	9.6e-14	2.5e-11
root system development		82	0.0012	0.021
nitrogen compound transport		80	6e-05	0.0015
root development		79	0.0028	0.044
cellular amino acid metabolic process		78	9.8e-15	3.1e-12
protein localization		78	0.0004	0.0083
single-organism carbohydrate metabolic process		76	4.6e-13	1e-10
secondary metabolic process		73	1e-07	6.3e-06
sulfur compound metabolic process		68	2.3e-08	1.6e-06
cellular macromolecule localization		66	2.7e-05	0.00075
monocarboxylic acid metabolic process		65	1.1e-06	4.5e-05
organophosphate metabolic process		65	2.3e-09	2.5e-07
amide transport		64	0.00028	0.0061
organic acid biosynthetic process		64	2.5e-07	1.4e-05
alpha-amino acid metabolic process		63	8.3e-15	2.9e-12
establishment of protein localization		63	0.00026	0.0059
peptide transport		63	0.00029	0.0062
protein transport		63	0.00017	0.0039
plant organ morphogenesis		63	0.0026	0.04
carboxylic acid biosynthetic process		62	2.6e-07	1.4e-05
response to oxidative stress		61	6.4e-06	0.00022
cellular protein localization		59	0.00016	0.0036
establishment of localization in cell		59	4.5e-05	0.0012
intracellular transport		58	1.4e-05	0.00043
cellular carbohydrate metabolic process		55	5.1e-10	6.6e-08
nucleobase-containing small molecule metabolic process		55	3e-12	6.1e-10
cofactor metabolic process		55	2.6e-06	9.5e-05
polysaccharide metabolic process		52	2.6e-06	9.3e-05
external encapsulating structure organization		51	2.1e-05	0.0006
cell wall organization		49	9.7e-06	0.00032
intracellular protein transport		49	1.4e-05	0.00043
nucleoside phosphate metabolic process		49	2.3e-11	4.1e-09
plant-type cell wall organization or biogenesis		49	1.5e-05	0.00047
cell wall biogenesis		48	8.9e-08	5.5e-06
nucleotide metabolic process		48	3.1e-11	5.1e-09
ribonucleoprotein complex biogenesis		48	9.1e-05	0.0022
methylation		44	1.1e-05	0.00035
plant epidermis development		44	0.0027	0.042
coenzyme metabolic process		43	6.2e-11	9.3e-09
ribose phosphate metabolic process		42	3.9e-11	6.1e-09
organonitrogen compound catabolic process		41	0.00076	0.014
secondary metabolite biosynthetic process		41	1.2e-06	4.7e-05
carbohydrate biosynthetic process		40	3.6e-05	0.00098
carbohydrate derivative biosynthetic process		40	0.0025	0.039
vesicle-mediated transport		39	0.0024	0.038
plant-type cell wall biogenesis		38	5.1e-09	5e-07
generation of precursor metabolites and energy		36	0.00058	0.012
purine-containing compound metabolic process		36	1.2e-08	9.7e-07
carbohydrate catabolic process		34	6.5e-07	3e-05
cellular polysaccharide metabolic process		34	6.1e-06	0.00021
purine nucleotide metabolic process		34	5.8e-09	5.5e-07
ribonucleotide metabolic process		34	3.1e-08	2e-06
organic hydroxy compound metabolic process		34	0.00099	0.018
small molecule catabolic process		33	1.3e-08	1e-06
organic cyclic compound catabolic process		33	5.6e-05	0.0014
nucleoside monophosphate metabolic process		32	7e-09	6.4e-07
purine ribonucleotide metabolic process		32	3e-08	2e-06
sulfur compound biosynthetic process		32	1.6e-05	0.00047
ribonucleoside monophosphate metabolic process		31	1.6e-08	1.2e-06
protein localization to organelle		30	0.0026	0.04
organophosphate biosynthetic process		30	0.00046	0.0094
cellular amino acid biosynthetic process		29	3e-07	1.6e-05
cellular glucan metabolic process		28	2.4e-05	0.00069
glucan metabolic process		28	3.6e-05	0.00098
purine nucleoside monophosphate metabolic process		28	1.3e-07	7.6e-06
purine ribonucleoside monophosphate metabolic process		28	1.3e-07	7.6e-06
aromatic compound catabolic process		28	0.00073	0.014
response to hypoxia		28	0.0023	0.037
alpha-amino acid biosynthetic process		27	4.7e-07	2.3e-05
cellular carbohydrate biosynthetic process		27	0.0001	0.0024
polysaccharide biosynthetic process		27	0.00033	0.0071
oxidoreduction coenzyme metabolic process		27	3.6e-09	3.7e-07
phenylpropanoid metabolic process		26	1.8e-08	1.3e-06
reactive oxygen species metabolic process		26	3.4e-07	1.7e-05
nucleoside triphosphate metabolic process		25	6.4e-06	0.00022
purine nucleoside triphosphate metabolic process		25	1e-06	4e-05
purine ribonucleoside triphosphate metabolic process		25	7.4e-07	3.1e-05
ribonucleoside triphosphate metabolic process		25	2.4e-06	8.9e-05
pyridine-containing compound metabolic process		25	1.1e-08	9.1e-07
nicotinamide nucleotide metabolic process		24	7.9e-09	7e-07
pyridine nucleotide metabolic process		24	1.1e-08	9.1e-07
carboxylic acid catabolic process		24	1.2e-06	4.6e-05
organic acid catabolic process		24	1.2e-06	4.6e-05
cellular response to hypoxia		24	0.00033	0.0071
cellular response to decreased oxygen levels		24	0.00038	0.0079
cellular response to oxygen levels		24	0.0004	0.0083
cellular nitrogen compound catabolic process		24	0.0028	0.044
single-organism carbohydrate catabolic process		23	3.8e-09	3.8e-07
cellular polysaccharide biosynthetic process		23	0.0003	0.0065
response to metal ion		22	0.0024	0.038
ATP metabolic process		22	1.3e-05	0.00041
phenylpropanoid biosynthetic process		21	1.5e-08	1.1e-06
ribonucleoprotein complex assembly		21	0.00057	0.011
ribonucleoprotein complex subunit organization		21	0.00098	0.018
cell wall macromolecule metabolic process		21	0.0026	0.04

## Sheet: (C)CR MOLECULAR Function
Table S2 C. Gene ontology (GO) categories related to molecular function in clubroot resistant (CR) genotype.
Term	Genes	Count	P-Value	q-value
catalytic activity		836	5.5e-13	2.5e-10
ion binding		549	1.7e-05	0.0011
protein binding		480	0.00035	0.012
cation binding		348	3.6e-07	5.6e-05
metal ion binding		345	5.1e-07	6.2e-05
small molecule binding		294	0.00015	0.0061
anion binding		288	0.0014	0.031
oxidoreductase activity		192	3.7e-15	2.6e-12
transition metal ion binding		133	1.8e-05	0.0011
mRNA binding		129	2e-09	5.6e-07
hydrolase activity, acting on acid anhydrides		106	0.00056	0.018
pyrophosphatase activity		105	0.00064	0.02
hydrolase activity, acting on acid anhydrides, in phosphorus-containing anhydrides		105	0.00071	0.02
nucleoside-triphosphatase activity		98	0.0012	0.03
cofactor binding		71	4.9e-10	1.7e-07
structural molecule activity		68	3.1e-05	0.0017
peptidase activity, acting on L-amino acid peptides		62	0.00096	0.025
copper ion binding		53	1.7e-17	2.4e-14
lyase activity		53	0.00038	0.013
hydrolase activity, hydrolyzing O-glycosyl compounds		52	4.7e-05	0.0024
isomerase activity		43	1.5e-05	0.00098
calcium ion binding		42	1.7e-06	0.00017
ligase activity		40	0.00015	0.0061
coenzyme binding		38	0.00039	0.013
translation factor activity, RNA binding		37	3.3e-08	6.6e-06
macromolecular complex binding		36	0.0003	0.011
antioxidant activity		33	4.3e-07	6e-05
oxidoreductase activity, acting on CH-OH group of donors		33	5.6e-05	0.0025

## Sheet: (D) CS MOLECULAR Function
Table S2 D. Gene ontology (GO) categories related to molecular function in clubroot susceptible (CS) genotype.
Term	Genes	Count	P-Value	q-value
catalytic activity		581	2.3e-13	1.4e-10
cation binding		240	2.7e-06	0.00027
metal ion binding		239	2.5e-06	0.00027
small molecule binding		200	0.00076	0.035
oxidoreductase activity		134	4.8e-12	2e-09
transition metal ion binding		103	3.5e-07	5.4e-05
mRNA binding		93	1.6e-08	4.8e-06
structural molecule activity		58	8.9e-08	2e-05
cofactor binding		49	1.7e-07	2.9e-05
structural constituent of ribosome		43	2.9e-06	0.00027
copper ion binding		42	4.5e-16	5.5e-13
transferase activity, transferring one-carbon groups		40	2.4e-05	0.0019
methyltransferase activity		39	2e-05	0.0017
hydrolase activity, hydrolyzing O-glycosyl compounds		36	0.00048	0.023
coenzyme binding		31	5.6e-05	0.004
antioxidant activity		26	5.9e-07	8.1e-05
oxidoreductase activity, acting on CH-OH group of donors		25	9.4e-05	0.0064
oxidoreductase activity, acting on peroxide as acceptor		25	1e-07	2e-05
peroxidase activity		23	6.7e-07	8.2e-05
S-adenosylmethionine-dependent methyltransferase activity		23	0.00034	0.017
iron-sulfur cluster binding		21	0.00015	0.009
metal cluster binding		21	0.00015	0.009
oxidoreductase activity, acting on the CH-OH group of donors, NAD or NADP as acceptor		21	0.00036	0.017

## Sheet: (E) CR KEGG
Table S2 E. KEGG categories in clubroot resistant (CR) genotype.
KEGG Enriched Pathways in CR	Genes	Count	P-Value	q-value
Metabolic pathways		358	1e-11	1.3e-09
Biosynthesis of secondary metabolites		197	2.7e-06	0.00011
Biosynthesis of amino acids		58	7.8e-08	4.9e-06
Carbon metabolism		56	1.8e-05	0.00057
Oxidative phosphorylation		31	0.011	0.07
Glycolysis / Gluconeogenesis		30	5.9e-05	0.0015
Phenylpropanoid biosynthesis		30	0.00024	0.0033
Pyruvate metabolism		26	7.2e-05	0.0015
Glutathione metabolism		26	0.0002	0.0032
Cysteine and methionine metabolism		26	0.0036	0.03
Glycine, serine and threonine metabolism		21	8.1e-05	0.0015
2-Oxocarboxylic acid metabolism		18	0.0038	0.03
Alanine, aspartate and glutamate metabolism		16	0.00044	0.0056
Arginine and proline metabolism		15	0.0026	0.024
Pentose phosphate pathway		14	0.013	0.08
Sulfur metabolism		14	0.00061	0.007
Fatty acid degradation		13	0.0059	0.044
Arginine biosynthesis		12	0.0018	0.019
Nitrogen metabolism		12	0.0081	0.054
Fatty acid biosynthesis		12	0.0081	0.054
Tyrosine metabolism		11	0.016	0.092
Selenocompound metabolism		8	0.0027	0.024

## Sheet: (F) CS KEGG
Table S2 E. KEGG categories in clubroot susceptible (CS) genotype.
KEGG Enriched Pathways in CS	Genes	Count	P-Value	q-value
Metabolic pathways		260	5e-11	6.1e-09
Biosynthesis of secondary metabolites		160	4e-10	2.5e-08
Biosynthesis of amino acids		45	2e-07	8e-06
Carbon metabolism		47	8e-07	2.4e-05
Alanine, aspartate and glutamate metabolism		16	6.7e-06	0.00016
Phenylpropanoid biosynthesis		26	2.4e-05	0.00048
Glycolysis / Gluconeogenesis		24	5.9e-05	0.001
Arginine biosynthesis		12	7.8e-05	0.0012
Nitrogen metabolism		13	0.0001	0.0014
Pyruvate metabolism		20	0.00022	0.0026
Galactose metabolism		13	0.0016	0.018
Pentose phosphate pathway		12	0.0059	0.06
Purine metabolism		15	0.0092	0.087

## Sheet: (G) KEGG Analysis Metabolites
Table S2 G. KEGG pathway analysis using metabolte information. The information was generated using MetaboAnalyst 5.0
Pathway Name	Match Status	P-value	q-value
Aminoacyl-tRNA biosynthesis	14/46	2.8137e-10	2.7012e-08
Carbon fixation in photosynthetic organisms	7/21	6.5355e-06	0.00029763
Alanine, aspartate and glutamate metabolism	7/22	9.3009e-06	0.00029763
Purine metabolism	11/63	1.3395e-05	0.00032149
Glycine, serine and threonine metabolism	7/33	0.00016724	0.0032111
Pentose phosphate pathway	5/19	0.0005411	0.0086575
Citrate cycle (TCA cycle)	5/20	0.00070041	0.0096056
Valine, leucine and isoleucine biosynthesis	5/22	0.0011213	0.013455
Arginine biosynthesis	4/18	0.0040153	0.039474
Glyoxylate and dicarboxylate metabolism	5/29	0.0041119	0.039474
Glucosinolate biosynthesis	7/65	0.010393	0.090698
Nicotinate and nicotinamide metabolism	3/13	0.011709	0.093669
