# Supplementary material for: Proteome- and metabolome-level changes during early stages of clubroot infection in Brassica napus canola
Source: Royal Society of Chemistry journal article supplement (doi:10.1039/d3mo00210a), 2024-01-22
Supplement: d3mo00210a4.xlsx [file d3mo00210a4.xlsx]

## Sheet: (A) Sugar
Table S3 A. Differentially abundant proteins related to sugar. Res = clubroot resistant genotype, Sus = clubroot susceptible genotype,T = pathogen inoculated, C= uninoculated. the numbers 1, 4, and 7 indicate days post pathogen inoculation.
Proteins	Log2 Fold Change Res1T.C	Qvalue Res1T.C	Log2 Fold Change Res4T.C	Qvalue Res4T.C	Log2 Fold Change Res7T.C	Qvalue Res7T.C	Log2 Fold Change Sus1T.C	Qvalue Sus1T.C	Log2 Fold Change Sus4T.C	Qvalue Sus4T.C	Log2 Fold Change Sus7T.C	Qvalue Sus7T.C	KEGG	Swissprot	Pfam
BnaA01T0267000WE	-0.291358	0.0208631	0.640641	0.00566317	1.43938	0.00614098	0.24454	0.0472105	-0.136515	0.0928101	0.483771	0.0967131	pectinesterase/pectinesterase inhibitor 3-like; K01051 pectinesterase [EC:3.1.1.11] (A)	Pectinesterase/pectinesterase inhibitor 3 OS=Arabidopsis thaliana GN=PME3 PE=2 SV=2	Plant invertase/pectin methylesterase inhibitor
BnaA02T0211300WE	-0.49846	0.0223288	0.0472713	0.250195	-0.811408	0.0391893	0.308767	0.0130222	0.0774134	0.198829	0.190748	0.141516	mannose-1-phosphate guanyltransferase alpha-like; K00966 mannose-1-phosphate guanylyltransferase [EC:2.7.7.13] (A)	Mannose-1-phosphate guanyltransferase alpha OS=Dictyostelium discoideum GN=gmppA PE=2 SV=1	Bacterial transferase hexapeptide (six repeats)
BnaA03T0105500WE	-0.0409305	0.28279	-0.393528	0.229124	-1.72851	0.021402	0.361771	0.00992989	-0.0779562	0.31401	-0.644127	0.0299783	sucrose synthase 1-like; K00695 sucrose synthase [EC:2.4.1.13] (A)	Sucrose synthase 1 OS=Arabidopsis thaliana GN=SUS1 PE=1 SV=3	Glycosyl transferases group 1
BnaA03T0166500WE	-0.130285	0.0443991	-0.369456	0.0866608	-1.265	0.0034358	0.0360176	0.344972	-0.111416	0.233665	-0.28234	0.021564	probable fructokinase-1; K00847 fructokinase [EC:2.7.1.4] (A)	Probable fructokinase-1 OS=Arabidopsis thaliana GN=At2g31390 PE=2 SV=1	pfkB family carbohydrate kinase
BnaA03T0450200WE	-0.813228	0.0945303	0.213327	0.208379	0.788903	0.0412565	-1.02721	0.0318693	0.49679	0.0194506	0.332986	0.0975508	alpha,alpha-trehalose-phosphate synthase [UDP-forming] 5; K16055 trehalose 6-phosphate synthase/phosphatase [EC:2.4.1.15 3.1.3.12] (A)	Alpha,alpha-trehalose-phosphate synthase [UDP-forming] 5 OS=Arabidopsis thaliana GN=TPS5 PE=1 SV=2	Trehalose-phosphatase
BnaA04T0110100WE	0.0443875	0.222929	0.899013	0.0075853	0.863544	0.00816465	-0.269315	0.0290619	-0.209184	0.00662949	0.507478	0.0502773	probable galactinol--sucrose galactosyltransferase 5; K06617 raffinose synthase [EC:2.4.1.82] (A)	Probable galactinol--sucrose galactosyltransferase 5 OS=Arabidopsis thaliana GN=RFS5 PE=1 SV=1	Raffinose synthase or seed imbibition protein Sip1
BnaA05T0141800WE	0.168672	0.0652157	0.670127	0.0033776	1.22304	0.00771345	-0.308332	0.220981	-0.0149185	0.317757	0.682849	0.0316861	sucrose synthase 5; K00695 sucrose synthase [EC:2.4.1.13] (A)	Sucrose synthase 5 OS=Arabidopsis thaliana GN=SUS5 PE=2 SV=1	Glycosyl transferases group 1
BnaA05T0358200WE	-0.120172	0.0541792	0.297771	0.0055531	1.28771	0.0059816	0.306994	0.0389491	-0.124113	0.139461	0.789218	0.0563255	pectinesterase/pectinesterase inhibitor 3; K01051 pectinesterase [EC:3.1.1.11] (A)	Pectinesterase/pectinesterase inhibitor 3 OS=Arabidopsis thaliana GN=PME3 PE=2 SV=2	Plant invertase/pectin methylesterase inhibitor
BnaA06T0061000WE	0.166072	0.15357	0.465415	0.14863	3.11942	0.00797544	-0.918004	0.00999226	1.70023	0.00102034	-2.5982	0.239152	sucrose transport protein SUC4-like; K15378 solute carrier family 45, member 1/2/4 (A)	Sucrose transport protein SUC4 OS=Arabidopsis thaliana GN=SUC4 PE=1 SV=2	MFS/sugar transport protein
BnaA06T0145000WE	0.505703	0.0360681	-0.542043	0.0271765	-1.47358	0.00371015	0.41158	0.350748	0.408668	0.0160695	0.0749156	0.263101	pyrophosphate--fructose 6-phosphate 1-phosphotransferase subunit alpha 1; K00895 pyrophosphate--fructose-6-phosphate 1-phosphotransferase [EC:2.7.1.90] (A)	Pyrophosphate--fructose 6-phosphate 1-phosphotransferase subunit alpha 1 OS=Arabidopsis thaliana GN=PFP-ALPHA1 PE=2 SV=1	Phosphofructokinase
BnaA06T0451400WE	-0.938742	0.0247209	-0.0938011	0.196194	4.22213	0.00980834	0.649269	0.0107508	-0.181629	0.191777	1.80663	0.0615512	--	Putative invertase inhibitor OS=Platanus acerifolia PE=1 SV=1	Plant invertase/pectin methylesterase inhibitor
BnaA07T0175100WE	-0.132465	0.0160547	-0.702033	0.0315221	-1.07175	0.0107668	-0.484947	0.139133	-0.251825	0.153245	-0.596347	0.00526518	fructose-bisphosphate aldolase, cytoplasmic isozyme; K01623 fructose-bisphosphate aldolase, class I [EC:4.1.2.13] (A)	Fructose-bisphosphate aldolase, cytoplasmic isozyme OS=Cicer arietinum GN=ALDC PE=2 SV=1	Fructose-bisphosphate aldolase class-I
BnaA07T0251600WE	0.100487	0.364983	0.616765	0.007731	1.15223	0.0136964	0.182682	0.0470988	-0.0573041	0.331985	0.601189	0.0477322	sucrose synthase 6-like; K00695 sucrose synthase [EC:2.4.1.13] (A)	Sucrose synthase 6 OS=Arabidopsis thaliana GN=SUS6 PE=1 SV=1	Glycosyl transferases group 1
BnaA07T0333600WE	-0.543577	0.092002	0.616291	0.0016867	1.35276	0.00953973	-0.377686	0.156583	0.699132	0.0329973	0.890119	0.0391535	sucrose synthase 6; K00695 sucrose synthase [EC:2.4.1.13] (A)	Sucrose synthase 6 OS=Arabidopsis thaliana GN=SUS6 PE=1 SV=1	Glycosyl transferases group 1
BnaA07T0358600WE	-0.224842	0.0115669	-0.452465	0.2287	-1.68745	0.0328997	0.209334	0.0161406	0.0304871	0.385469	-0.828166	0.0115861	pyrophosphate--fructose 6-phosphate 1-phosphotransferase subunit alpha 2; K00895 pyrophosphate--fructose-6-phosphate 1-phosphotransferase [EC:2.7.1.90] (A)	Pyrophosphate--fructose 6-phosphate 1-phosphotransferase subunit alpha 2 OS=Arabidopsis thaliana GN=PFP-ALPHA2 PE=2 SV=1	Phosphofructokinase
BnaA08T0223600WE	-0.0596458	0.106389	-0.289909	0.0644226	-0.661253	0.00387927	0.184883	0.0370851	0.0953182	0.138245	-0.1838	0.0560368	pyrophosphate--fructose 6-phosphate 1-phosphotransferase subunit alpha 1; K00895 pyrophosphate--fructose-6-phosphate 1-phosphotransferase [EC:2.7.1.90] (A)	Pyrophosphate--fructose 6-phosphate 1-phosphotransferase subunit alpha 1 OS=Arabidopsis thaliana GN=PFP-ALPHA1 PE=2 SV=1	Phosphofructokinase
BnaA08T0224100WE	0.549922	0.295631	-0.180508	0.354355	0.441468	0.0727877	-0.321159	0.365246	0.234206	0.261099	1.27356	0.0485599	sugar transporter, putative (EC:1.3.1.74); K08150 MFS transporter, SP family, solute carrier family 2 (myo-inositol transporter), member 13 (A)	Monosaccharide-sensing protein 1 OS=Arabidopsis thaliana GN=MSSP1 PE=1 SV=2	Sugar (and other) transporter
BnaA09T0227400WE	-0.373097	0.0261407	0.811006	0.00404196	0.92781	0.0242381	-0.222436	0.165603	0.334532	0.383384	-0.420769	0.219643	pyrophosphate--fructose 6-phosphate 1-phosphotransferase subunit beta 2; K00895 pyrophosphate--fructose-6-phosphate 1-phosphotransferase [EC:2.7.1.90] (A)	Pyrophosphate--fructose 6-phosphate 1-phosphotransferase subunit beta 2 OS=Arabidopsis thaliana GN=PFP-BETA2 PE=3 SV=1	Phosphofructokinase
BnaA09T0231100WE	-0.174114	0.263799	0.429273	0.00503526	2.20559	0.00702045	0.542133	0.0120437	-0.591382	0.00361666	0.857307	0.0629187	pectinesterase-like; K01051 pectinesterase [EC:3.1.1.11] (A)	21 kDa protein OS=Daucus carota PE=2 SV=1	Plant invertase/pectin methylesterase inhibitor
BnaA10T0057700WE	0.165535	0.366464	-0.193509	0.210789	-1.57678	0.00971862	0.184925	0.233141	-0.0231311	0.365791	-0.536436	0.00684356	hexokinase-like 1 protein; K00844 hexokinase [EC:2.7.1.1] (A)	Hexokinase-like 1 protein OS=Arabidopsis thaliana GN=At1g47840 PE=2 SV=2	Hexokinase
BnaA10T0167800WE	-0.196857	0.0394452	-0.194294	0.379393	-1.36502	0.038214	0.916296	0.0256072	0.0609217	0.299895	-0.509944	0.015983	sucrose synthase 1-like; K00695 sucrose synthase [EC:2.4.1.13] (A)	Sucrose synthase 1 OS=Arabidopsis thaliana GN=SUS1 PE=1 SV=3	Glycosyl transferases group 1
BnaC01T0037600WE	0.0758828	0.204876	-0.0165777	0.364884	-0.810678	0.0130463	-0.0477155	0.34704	0.0202355	0.324754	-0.630207	0.00801798	ATP-dependent 6-phosphofructokinase 6; K00850 6-phosphofructokinase 1 [EC:2.7.1.11] (A)	ATP-dependent 6-phosphofructokinase 6 OS=Arabidopsis thaliana GN=PFK6 PE=1 SV=1	Phosphofructokinase
BnaC01T0371200WE	-0.357501	0.0295099	0.590415	0.0219956	1.91267	0.00336348	0.112829	0.0816239	-0.313722	0.0193015	0.942423	0.0649207	pectinesterase/pectinesterase inhibitor 3-like; K01051 pectinesterase [EC:3.1.1.11] (A)	Pectinesterase/pectinesterase inhibitor 3 OS=Arabidopsis thaliana GN=PME3 PE=2 SV=2	Plant invertase/pectin methylesterase inhibitor
BnaC02T0537900WE	-0.19611	0.139514	0.0669455	0.373809	-1.30892	0.0133037	-0.372315	0.016364	0.317537	0.0698688	0.0448521	0.232958	GDP-mannose 4,6 dehydratase 1-like; K01711 GDPmannose 4,6-dehydratase [EC:4.2.1.47] (A)	GDP-mannose 4,6 dehydratase 1 OS=Arabidopsis thaliana GN=GMD1 PE=1 SV=1	NAD dependent epimerase/dehydratase family
BnaC03T0044600WE	-0.147257	0.110247	-0.558909	0.206083	-2.25077	0.0159662	-0.154267	0.36085	-0.231051	0.207231	-0.67495	0.0221932	sucrose synthase 1; K00695 sucrose synthase [EC:2.4.1.13] (A)	Sucrose synthase 1 OS=Arabidopsis thaliana GN=SUS1 PE=1 SV=3	Glycosyl transferases group 1
BnaC04T0056600WE	-1.38717	0.171794	0.245167	0.270209	1.5709	0.117225	-0.485053	0.0148285	-0.884895	0.0168962	-0.120775	0.229743	probable pectinesterase/pectinesterase inhibitor 17; K01051 pectinesterase [EC:3.1.1.11] (A)	Probable pectinesterase/pectinesterase inhibitor 17 OS=Arabidopsis thaliana GN=PME17 PE=2 SV=2	Plant invertase/pectin methylesterase inhibitor
BnaC04T0306500WE	0.118266	0.0835131	-0.293236	0.0208189	-0.737101	0.0128709	0.404838	0.138115	-0.229749	0.0520939	-0.0674298	0.107239	triosephosphate isomerase, cytosolic-like; K01803 triosephosphate isomerase (TIM) [EC:5.3.1.1] (A)	Triosephosphate isomerase, cytosolic OS=Arabidopsis thaliana GN=CTIMC PE=1 SV=2	Triosephosphate isomerase
BnaC05T0102400WE	0.0350143	0.359049	-0.0765121	0.201406	-0.662827	0.00249436	-0.152168	0.0245493	0.144285	0.00644389	-0.0281064	0.299452	pyrophosphate--fructose 6-phosphate 1-phosphotransferase subunit beta 1; K00895 pyrophosphate--fructose-6-phosphate 1-phosphotransferase [EC:2.7.1.90] (A)	Pyrophosphate--fructose 6-phosphate 1-phosphotransferase subunit beta 1 OS=Arabidopsis thaliana GN=PFP-BETA1 PE=1 SV=1	Phosphofructokinase
BnaC06T0188100WE	-0.349339	0.127577	-0.021939	0.342403	0.867969	0.00131208	-0.305556	0.227385	0.605635	0.00825277	0.0957412	0.12913	alpha,alpha-trehalose-phosphate synthase [UDP-forming] 5-like; K16055 trehalose 6-phosphate synthase/phosphatase [EC:2.4.1.15 3.1.3.12] (A)	Alpha,alpha-trehalose-phosphate synthase [UDP-forming] 5 OS=Arabidopsis thaliana GN=TPS5 PE=1 SV=2	Trehalose-phosphatase
BnaC08T0231100WE	-0.382884	0.0419679	-0.160138	0.324854	-1.40868	0.0697452	-0.744205	0.084644	-0.130643	0.262182	-0.889379	0.0370125	probable alpha,alpha-trehalose-phosphate synthase [UDP-forming] 9; K16055 trehalose 6-phosphate synthase/phosphatase [EC:2.4.1.15 3.1.3.12] (A)	Probable alpha,alpha-trehalose-phosphate synthase [UDP-forming] 9 OS=Arabidopsis thaliana GN=TPS9 PE=2 SV=1	Trehalose-phosphatase
BnaC08T0265600WE	0.118622	0.31177	0.0421488	0.373748	-0.596332	0.00301914	0.0487602	0.266199	0.0222272	0.278562	-0.0880632	0.198935	GDP-mannose 4,6 dehydratase 2-like; K01711 GDPmannose 4,6-dehydratase [EC:4.2.1.47] (A)	GDP-mannose 4,6 dehydratase 2 OS=Arabidopsis thaliana GN=MUR1 PE=1 SV=3	NAD dependent epimerase/dehydratase family
BnaC08T0458400WE	-0.129003	0.187572	0.6008	0.00799401	1.04103	0.0126583	0.370397	0.00538289	0.314115	0.0119017	0.00956823	0.322258	pectinesterase/pectinesterase inhibitor 18; K01051 pectinesterase [EC:3.1.1.11] (A)	Pectinesterase/pectinesterase inhibitor 18 OS=Arabidopsis thaliana GN=PME18 PE=1 SV=3	Plant invertase/pectin methylesterase inhibitor
BnaC09T0431200WE	0.090254	0.282502	-0.067136	0.373661	-1.23837	0.0207172	0.249819	0.0391334	0.111132	0.280101	-0.401754	0.015958	sucrose synthase 1-like; K00695 sucrose synthase [EC:2.4.1.13] (A)	Sucrose synthase 1 OS=Arabidopsis thaliana GN=SUS1 PE=1 SV=3	Glycosyl transferases group 1

## Sheet: (B) Organic Acid
Table S3 B. Differentially abundant proteins related to organic acid. Res = clubroot resistant genotype, Sus = clubroot susceptible genotype,T = pathogen inoculated, C= uninoculated. the numbers 1, 4, and 7 indicate days post pathogen inoculation.
Organic Acid	Log2 Fold Change Res1T.C	Qvalue Res1T.C	Log2 Fold Change Res4T.C	Qvalue Res4T.C	Log2 Fold Change Res7T.C	Qvalue Res7T.C	Log2 Fold Change Sus1T.C	Qvalue Sus1T.C	Log2 Fold Change Sus4T.C	Qvalue Sus4T.C	Log2 Fold Change Sus7T.C	Qvalue Sus7T.C	KEGG	Swissprot	Pfam
BnaA05T0027100WE	0.579161	0.0447188	0.20971	0.0119478	0.786696	0.00940234	0.247906	0.245007	-0.217657	0.00510461	0.250852	0.0434844	3-isopropylmalate dehydratase small subunit 1-like; K01704 3-isopropylmalate/(R)-2-methylmalate dehydratase small subunit [EC:4.2.1.33 4.2.1.35] (A)	3-isopropylmalate dehydratase small subunit 1 OS=Arabidopsis thaliana GN=IPMI2 PE=1 SV=1	Aconitase C-terminal domain
BnaA07T0240000WE	0.369901	0.0350524	0.159093	0.330379	-1.37448	0.00151747	-0.233893	0.106518	0.829721	0.00764145	0.140748	0.3761	NADP-dependent malic enzyme 4, chloroplastic-like; K00029 malate dehydrogenase (oxaloacetate-decarboxylating)(NADP+) [EC:1.1.1.40] (A)	NADP-dependent malic enzyme 4, chloroplastic OS=Arabidopsis thaliana GN=NADP-ME4 PE=1 SV=1	Malic enzyme, N-terminal domain
BnaA08T0151200WE	0.188805	0.0203503	-0.0421699	0.310034	-0.428783	0.0112803	-0.0589891	0.25647	-0.501332	0.0413663	-0.455069	0.0278722	aconitate hydratase 3, mitochondrial-like; K01681 aconitate hydratase [EC:4.2.1.3] (A)	Aconitate hydratase 3, mitochondrial OS=Arabidopsis thaliana GN=ACO3 PE=2 SV=3	Aconitase C-terminal domain
BnaA08T0159700WE	0.20043	0.0786578	0.127359	0.208188	-0.39811	0.00501218	0.630547	0.0099434	0.136021	0.387357	0.061541	0.292074	aconitate hydratase 1-like; K01681 aconitate hydratase [EC:4.2.1.3] (A)	Aconitate hydratase 1 OS=Arabidopsis thaliana GN=ACO1 PE=1 SV=2	Aconitase C-terminal domain
BnaA08T0278400WE	-0.206376	0.0891911	-0.647404	0.00476133	0.491731	0.00173343	0.0466396	0.325785	-0.197077	0.141733	-0.370162	0.1133	Succinate dehydrogenase subunit 6, mitochondrial OS=Arabidopsis thaliana GN=SDH6 PE=1 SV=1	Succinate dehydrogenase subunit 6, mitochondrial OS=Arabidopsis thaliana GN=SDH6 PE=1 SV=1	Succinate dehydrogenase subunit 6, mitochondrial OS=Arabidopsis thaliana GN=SDH6 PE=1 SV=1
BnaC01T0366800WE	0.4189	0.0173038	0.0504137	0.26415	-0.513306	0.0217804	-0.215222	0.0693552	-0.124656	0.36955	0.0242544	0.251043	phosphoenolpyruvate carboxylase 3; K01595 phosphoenolpyruvate carboxylase [EC:4.1.1.31] (A)	Phosphoenolpyruvate carboxylase 3 OS=Arabidopsis thaliana GN=PPC3 PE=2 SV=2	Phosphoenolpyruvate carboxylase
BnaC01T0367000WE	0.0195152	0.126979	0.0449341	0.383292	-0.391059	0.0297913	-0.199813	0.0246907	-0.155014	0.0271093	-0.590499	0.0172479	phosphoenolpyruvate carboxylase 3; K01595 phosphoenolpyruvate carboxylase [EC:4.1.1.31] (A)	Phosphoenolpyruvate carboxylase 3 OS=Arabidopsis thaliana GN=PPC3 PE=2 SV=2	Phosphoenolpyruvate carboxylase
BnaC02T0532600WE	0.0566086	0.298508	-0.369751	0.0256338	-1.72725	0.00120828	-0.73217	0.0268457	-0.81252	0.0115075	-0.228702	0.108519	phosphoenolpyruvate carboxykinase [ATP]-like; K01610 phosphoenolpyruvate carboxykinase (ATP) [EC:4.1.1.49] (A)	Phosphoenolpyruvate carboxykinase [ATP] OS=Arabidopsis thaliana GN=PCKA PE=1 SV=1	Phosphoenolpyruvate carboxykinase
BnaC03T0502800WE	0.088524	0.377752	0.115991	0.285137	-1.70725	0.00135601	0.0376544	0.337587	-0.552421	0.0253141	-0.740715	0.0127413	phosphoenolpyruvate carboxylase 1-like; K01595 phosphoenolpyruvate carboxylase [EC:4.1.1.31] (A)	Phosphoenolpyruvate carboxylase 3 OS=Arabidopsis thaliana GN=PPC3 PE=2 SV=2	Phosphoenolpyruvate carboxylase
BnaC03T0609700WE	0.683292	0.0380562	-0.588801	0.0250207	-0.464487	0.00588845	-1.27153	0.119786	-0.19217	0.105741	0.220694	0.0529706	aconitate hydratase 1-like; K01681 aconitate hydratase [EC:4.2.1.3] (A)	Aconitate hydratase 1 OS=Arabidopsis thaliana GN=ACO1 PE=1 SV=2	Aconitase C-terminal domain
BnaC04T0038900WE	0.41593	0.0263343	0.489435	0.00426168	0.528739	0.00659218	-0.14915	0.237055	-0.0456753	0.2812	0.159615	0.111832	3-isopropylmalate dehydratase small subunit 1-like; K01704 3-isopropylmalate/(R)-2-methylmalate dehydratase small subunit [EC:4.2.1.33 4.2.1.35] (A)	3-isopropylmalate dehydratase small subunit 1 OS=Arabidopsis thaliana GN=IPMI2 PE=1 SV=1	Aconitase C-terminal domain
BnaC05T0215100WE	0.468471	0.107072	0.635879	0.023014	2.04798	0.00707123	-0.89765	0.0284214	0.399475	0.0665188	-0.0680592	0.0798676	phosphoenolpyruvate carboxylase 4-like; K01595 phosphoenolpyruvate carboxylase [EC:4.1.1.31] (A)	Phosphoenolpyruvate carboxylase 4 OS=Arabidopsis thaliana GN=PPC4 PE=2 SV=1	Phosphoenolpyruvate carboxylase
BnaC05T0428300WE	0.333607	0.0172259	-0.18936	0.120117	-0.938005	0.00853052	-0.0733577	0.178667	-0.480454	0.123169	-0.280884	0.0667124	phosphoenolpyruvate carboxylase 3-like; K01595 phosphoenolpyruvate carboxylase [EC:4.1.1.31] (A)	Phosphoenolpyruvate carboxylase 3 OS=Arabidopsis thaliana GN=PPC3 PE=2 SV=2	Phosphoenolpyruvate carboxylase 3 OS=Arabidopsis thaliana GN=PPC3 PE=2 SV=2
Bnascaffold286T0025500WE	0.0319677	0.350435	0.170745	0.242271	-0.665696	0.041465	-0.0977517	0.356981	-0.127413	0.220662	-0.0633395	0.212085	aconitate hydratase 1; K01681 aconitate hydratase [EC:4.2.1.3] (A)	Aconitate hydratase 1 OS=Arabidopsis thaliana GN=ACO1 PE=1 SV=2	Aconitase C-terminal domain
Bnascaffold648T0000100WE	0.0323834	0.293406	0.36591	0.060057	0.666004	0.0195639	0.186613	0.10156	-0.0707958	0.178682	0.410439	0.157723	NADP-dependent malic enzyme 2; K00029 malate dehydrogenase (oxaloacetate-decarboxylating)(NADP+) [EC:1.1.1.40] (A)	NADP-dependent malic enzyme 2 OS=Arabidopsis thaliana GN=NADP-ME2 PE=1 SV=1	Malic enzyme, N-terminal domain
