# Supplementary material for: Proteome- and metabolome-level changes during early stages of clubroot infection in Brassica napus canola
Source: Royal Society of Chemistry journal article supplement (doi:10.1039/d3mo00210a), 2024-01-22
Supplement: d3mo00210a5.xlsx [file d3mo00210a5.xlsx]

## Sheet: (A)
Table S4 A. Differentially abundant proteins related to glycine serine threonine metabolism. Res = clubroot resistant genotype, Sus = clubroot susceptible genotype,T = pathogen inoculated, C= uninoculated. the numbers 1, 4, and 7 indicate days post pathogen inoculation.
Proteins	Log2 fold change Res1T.C	Qvalue Res1T.C	Log2 fold change Res4T.C	Qvalue Res4T.C	Log2 fold change Res7T.C	Qvalue Res7T.C	Log2 fold change Sus1T.C	Qvalue Sus1T.C	Log2 fold change Sus4T.C	Qvalue Sus4T.C	Log2 fold change Sus7T.C	Qvalue Sus7T.C	KEGG	Swissprot	Pfam
BnaA06T0096100WE	0.417317	0.0526221	0.245072	0.00145697	0.839202	0.0165833	-0.979256	0.233666	0.345337	0.131779	-0.583951	0.276449	aspartate-semialdehyde dehydrogenase-like; K00133 aspartate-semialdehyde dehydrogenase [EC:1.2.1.11] (A)	Aspartate-semialdehyde dehydrogenase OS=Synechocystis sp. (strain PCC 6803 / Kazusa) GN=asd PE=3 SV=2	Semialdehyde dehydrogenase, NAD binding domain
BnaA08T0174800WE	-0.0212241	0.20854	0.580389	0.0320223	1.45323	0.025853	0.32407	0.0629558	-0.888743	0.072448	0.309959	0.380673	alanine--glyoxylate aminotransferase 2 homolog 1, mitochondrial; K00827 alanine-glyoxylate transaminase / (R)-3-amino-2-methylpropionate-pyruvate transaminase [EC:2.6.1.44 2.6.1.40] (A)	Alanine--glyoxylate aminotransferase 2 homolog 1, mitochondrial OS=Arabidopsis thaliana GN=AGT2 PE=2 SV=1	Aminotransferase class-III
BnaA09T0102100WE	0.00547411	0.345434	-0.169139	0.20653	1.60768	0.00223576	-0.286109	0.135136	-0.723809	0.0236776	-0.229238	0.259151	homoserine kinase-like; K00872 homoserine kinase [EC:2.7.1.39] (A)	Homoserine kinase OS=Arabidopsis thaliana GN=HSK PE=1 SV=1	GHMP kinases C terminal
BnaA10T0106700WE	0.423247	0.0339295	-0.480849	0.0198331	-0.87095	0.00854398	0.0661237	0.309301	-0.0987514	0.113152	-0.390383	0.0759385	tryptophan synthase beta chain 1, chloroplastic; K01696 tryptophan synthase beta chain [EC:4.2.1.20] (A)	Tryptophan synthase beta chain 1, chloroplastic OS=Arabidopsis thaliana GN=TSB1 PE=2 SV=1	Pyridoxal-phosphate dependent enzyme
BnaC01T0034100WE	0.117908	0.0338207	0.212675	0.079842	0.757649	0.0162589	0.126308	0.0881542	0.139931	0.122051	0.386505	0.0419934	glycine dehydrogenase (decarboxylating) 1, mitochondrial; K00281 glycine dehydrogenase [EC:1.4.4.2] (A)	Glycine dehydrogenase (decarboxylating) 1, mitochondrial OS=Arabidopsis thaliana GN=GLDP1 PE=1 SV=2	Glycine cleavage system P-protein
BnaC04T0410700WE	-0.14698	0.0320792	0.500885	0.00343851	0.862209	0.00381284	0.138961	0.0848811	0.116388	0.289396	0.641772	0.0563669	tryptophan synthase beta chain 2-like; K06001 tryptophan synthase beta chain [EC:4.2.1.20] (A)	Tryptophan synthase beta chain 2 OS=Aquifex aeolicus (strain VF5) GN=trpB2 PE=3 SV=1	Pyridoxal-phosphate dependent enzyme
BnaC04T0448100WE	-0.239843	0.0863032	0.194507	0.128525	0.709397	0.00366304	0.547851	0.0795113	0.247984	0.0398111	-0.38636	0.0822697	probable sarcosine oxidase; K00306 sarcosine oxidase / L-pipecolate oxidase [EC:1.5.3.1 1.5.3.7] (A)	Probable sarcosine oxidase OS=Arabidopsis thaliana GN=At2g24580 PE=2 SV=1	FAD dependent oxidoreductase
Bnascaffold1716T0007200WE	-0.705254	0.0432669	0.179894	0.137845	0.909449	0.00642091	0.938138	0.20152	0.131337	0.265432	0.421022	0.291027	serine hydroxymethyltransferase 1, mitochondrial-like; K00600 glycine hydroxymethyltransferase [EC:2.1.2.1] (A)	Serine hydroxymethyltransferase 1, mitochondrial OS=Arabidopsis thaliana GN=SHM1 PE=1 SV=1	Serine hydroxymethyltransferase

## Sheet: (B)
Table S4 B. Differentially abundant proteins related to proline arginine metabolism. Res = clubroot resistant genotype, Sus = clubroot susceptible genotype,T = pathogen inoculated, C= uninoculated. the numbers 1, 4, and 7 indicate days post pathogen inoculation.
Proteins	Log2 fold change Res1T.C	Qvalue Res1T.C	Log2 fold change Res4T.C	Qvalue Res4T.C	Log2 fold change Res7T.C	Qvalue Res7T.C	Log2 fold change Sus1T.C	Qvalue Sus1T.C	Log2 fold change Sus4T.C	Qvalue Sus4T.C	Log2 fold change Sus7T.C	Qvalue Sus7T.C	KEGG	Swissprot	Pfam
BnaA03T0259800WE	1.5389	0.070302	-0.0136452		0.374558	1.20666	0.00747413	-0.454487	0.161248	-0.0264182	0.0693091	0.534148	0.0186336	arginase 1, mitochondrial; K01476 arginase [EC:3.5.3.1] (A)	Arginase 1, mitochondrial OS=Arabidopsis thaliana GN=ARGAH1 PE=2 SV=1	Arginase family
BnaA04T0189600WE	-0.13461	0.0696328	-0.168122		0.0490888	-0.741706	0.0010634	-0.087284	0.0534738	-0.147913	0.0252356	-0.316733	0.100019	aspartate aminotransferase, mitochondrial-like; K14455 aspartate aminotransferase, mitochondrial [EC:2.6.1.1] (A)	Aspartate aminotransferase, mitochondrial OS=Arabidopsis thaliana GN=ASP1 PE=1 SV=1	Aminotransferase class I and II
BnaA09T0483000WE	0.0588816	0.312328	-0.0519536		0.151494	-0.828151	0.0136742	-0.576898	0.0442121	0.0059884	0.0548086	-0.187949	0.0587232	delta-1-pyrroline-5-carboxylate synthase B-like; K12657 delta-1-pyrroline-5-carboxylate synthetase [EC:2.7.2.11 1.2.1.41] (A)	Delta-1-pyrroline-5-carboxylate synthase B OS=Arabidopsis thaliana GN=P5CSB PE=2 SV=1	Aldehyde dehydrogenase family
BnaA10T0176200WE	0.0110618	0.31812	-0.295638		0.244822	-1.13237	0.0242921	0.0678283	0.0671538	0.0588081	0.27382	-0.329262	0.00639655	aspartate aminotransferase, cytoplasmic isozyme 1-like; K14454 aspartate aminotransferase, cytoplasmic [EC:2.6.1.1] (A)	Aspartate aminotransferase, cytoplasmic isozyme 1 OS=Arabidopsis thaliana GN=ASP2 PE=1 SV=2	Aminotransferase class I and II
BnaC04T0443600WE	-0.0885083	0.159733	0.337959		0.0422624	0.834956	0.0120582	0.841763	0.108267	0.455233	0.0731633	-0.0159035	0.168003	aspartate aminotransferase, cytoplasmic isozyme 2; K14454 aspartate aminotransferase, cytoplasmic [EC:2.6.1.1] (A)	Aspartate aminotransferase, cytoplasmic isozyme 2 OS=Arabidopsis thaliana GN=ASP4 PE=2 SV=2	Copper amine oxidase, enzyme domain
BnaC07T0243600WE	0.0966571	0.0233814	-0.0483956		0.250642	0.893599	0.00926235	-0.98941	0.0851833	0.027318	0.21557	-0.0281213	0.129967	ornithine aminotransferase, mitochondrial (EC:2.6.1.13); K00819 ornithine--oxo-acid transaminase [EC:2.6.1.13] (A)	Ornithine aminotransferase, mitochondrial OS=Arabidopsis thaliana GN=DELTA-OAT PE=1 SV=1	Aminotransferase class-III

## Sheet: (C) 
Table S4 C. Differentially abundant proteins related to phenylalanine tryptophan and tyrosine metabolism. Res = clubroot resistant genotype, Sus = clubroot susceptible genotype,T = pathogen inoculated, C= uninoculated. the numbers 1, 4, and 7 indicate days post pathogen inoculation.
Proteins	Log2 fold change Res1T.C	Qvalue Res1T.C	Log2 fold change Res4T.C	Qvalue Res4T.C	Log2 fold change Res7T.C	Qvalue Res7T.C	Log2 fold change Sus1T.C	Qvalue Sus1T.C	Log2 fold change Sus4T.C	Qvalue Sus4T.C	Log2 fold change Sus7T.C	Qvalue Sus7T.C	KEGG	Swissprot	Pfam
BnaA03T0029200WE	0.185321	0.0653117	-0.0771047	0.287585	-0.755469	0.00471102	-0.191538	0.103998	-0.138788	0.109644	-0.583725	0.00200708	anthranilate synthase alpha subunit 1, chloroplastic; K01657 anthranilate synthase component I [EC:4.1.3.27] (A)	Anthranilate synthase alpha subunit 1, chloroplastic OS=Arabidopsis thaliana GN=ASA1 PE=1 SV=1	Anthranilate synthase component I, N terminal region
BnaA04T0189600WE	-0.13461	0.0696328	-0.168122	0.0490888	-0.741706	0.0010634	-0.087284	0.0534738	-0.147913	0.0252356	-0.316733	0.100019	aspartate aminotransferase, mitochondrial-like; K14455 aspartate aminotransferase, mitochondrial [EC:2.6.1.1] (A)	Aspartate aminotransferase, mitochondrial OS=Arabidopsis thaliana GN=ASP1 PE=1 SV=1	Aminotransferase class I and II
BnaA09T0405300WE	0.633253	0.0473151	-0.422192	0.0381461	-1.50456	0.00125832	-0.193954	0.365954	-0.666435	0.118623	0.029611	0.383756	anthranilate synthase beta subunit 1, chloroplastic-like; K01658 anthranilate synthase component II [EC:4.1.3.27] (A)	Anthranilate synthase beta subunit 1, chloroplastic OS=Arabidopsis thaliana GN=ASB1 PE=1 SV=1	Glutamine amidotransferase class-I
BnaA10T0106700WE	0.423247	0.0339295	-0.480849	0.0198331	-0.87095	0.00854398	0.0661237	0.309301	-0.0987514	0.113152	-0.390383	0.0759385	tryptophan synthase beta chain 1, chloroplastic; K01696 tryptophan synthase beta chain [EC:4.2.1.20] (A)	Tryptophan synthase beta chain 1, chloroplastic OS=Arabidopsis thaliana GN=TSB1 PE=2 SV=1	Pyridoxal-phosphate dependent enzyme
BnaA10T0176200WE	0.0110618	0.31812	-0.295638	0.244822	-1.13237	0.0242921	0.0678283	0.0671538	0.0588081	0.27382	-0.329262	0.00639655	aspartate aminotransferase, cytoplasmic isozyme 1-like; K14454 aspartate aminotransferase, cytoplasmic [EC:2.6.1.1] (A)	Aspartate aminotransferase, cytoplasmic isozyme 1 OS=Arabidopsis thaliana GN=ASP2 PE=1 SV=2	Aminotransferase class I and II
BnaC04T0410700WE	-0.14698	0.0320792	0.500885	0.00343851	0.862209	0.00381284	0.138961	0.0848811	0.116388	0.289396	0.641772	0.0563669	tryptophan synthase beta chain 2-like; K06001 tryptophan synthase beta chain [EC:4.2.1.20] (A)	Tryptophan synthase beta chain 2 OS=Aquifex aeolicus (strain VF5) GN=trpB2 PE=3 SV=1	Pyridoxal-phosphate dependent enzyme
BnaC04T0425000WE	-0.0045857	0.31631	0.333104	0.0133644	0.669182	0.00382848	0.0969114	0.231713	0.24672	0.0232003	-0.0436783	0.220416	bifunctional aspartate aminotransferase and glutamate/aspartate-prephenate aminotransferase-like; K15849 bifunctional aspartate aminotransferase and glutamate/aspartate-prephenate aminotransferase [EC:2.6.1.1 2.6.1.78 2.6.1.79] (A)	Bifunctional aspartate aminotransferase and glutamate/aspartate-prephenate aminotransferase OS=Arabidopsis thaliana GN=PAT PE=1 SV=2	Aminotransferase class I and II
BnaC04T0443600WE	-0.0885083	0.159733	0.337959	0.0422624	0.834956	0.0120582	0.841763	0.108267	0.455233	0.0731633	-0.0159035	0.168003	aspartate aminotransferase, cytoplasmic isozyme 2; K14454 aspartate aminotransferase, cytoplasmic [EC:2.6.1.1] (A)	Aspartate aminotransferase, cytoplasmic isozyme 2 OS=Arabidopsis thaliana GN=ASP4 PE=2 SV=2	Copper amine oxidase, enzyme domain
