# Supplementary material for: Proteome- and metabolome-level changes during early stages of clubroot infection in Brassica napus canola
Source: Royal Society of Chemistry journal article supplement (doi:10.1039/d3mo00210a), 2024-01-22
Supplement: d3mo00210a6.xlsx [file d3mo00210a6.xlsx]

## Sheet: (A) FA Metabolism
Table S5 A. Differentially abundant proteins related to fatty acid metabolism. Res = clubroot resistant genotype, Sus = clubroot susceptible genotype,T = pathogen inoculated, C= uninoculated. the numbers 1, 4, and 7 indicate days post pathogen inoculation.
Proteins	Log2 fold change Res1T.C	Qvalue Res1T.C	Log2 fold change Res4T.C	Qvalue Res4T.C	Log2 fold change Res7T.C	Qvalue Res7T.C	Log2 fold change Sus1T.C	Qvalue Sus1T.C	Log2 fold change Sus4T.C	Qvalue Sus4T.C	Log2 fold change Sus7T.C	Qvalue Sus7T.C	KEGG	Swissprot	Pfam
BnaA03T0226100WE	-0.25249	0.0307824	-0.707108	0.0464392	-1.89306	0.0122018	0.295176	0.108379	-0.0151577	0.381353	-0.758062	0.00859193	acyl-[acyl-carrier-protein] desaturase, chloroplastic (EC:1.14.19.2); K03921 acyl-[acyl-carrier-protein] desaturase [EC:1.14.19.2 1.14.19.11 1.14.19.26] (A)	Acyl-[acyl-carrier-protein] desaturase, chloroplastic OS=Brassica napus PE=2 SV=1	Fatty acid desaturase
BnaA03T0312100WE	-0.687797	0.0231211	0.255489	0.0503272	0.777863	0.0063666	0.204667	0.222232	0.0640625	0.272794	-0.141237	0.128658	long chain acyl-CoA synthetase 6, peroxisomal; K01897 long-chain acyl-CoA synthetase [EC:6.2.1.3] (A)	Long chain acyl-CoA synthetase 6, peroxisomal OS=Arabidopsis thaliana GN=LACS6 PE=1 SV=1	AMP-binding enzyme
BnaA04T0136600WE	0.147167	0.23475	0.491367	0.0158631	1.55706	0.0111252	0.341158	0.208312	-0.191309	0.0765497	0.322608	0.103385	3-hydroxyacyl-[acyl-carrier-protein] dehydratase FabZ-like; K02372 3-hydroxyacyl-[acyl-carrier-protein] dehydratase [EC:4.2.1.59] (A)	3-hydroxyacyl-[acyl-carrier-protein] dehydratase FabZ OS=Thermosynechococcus elongatus (strain BP-1) GN=fabZ PE=3 SV=1	FabA-like domain
BnaA07T0231200WE	-0.382317	0.0881616	-0.0435667	0.318703	0.756253	0.0213031	0.278141	0.250215	0.0365663	0.214872	-0.202762	0.0360613	acs6; long chain acyl-CoA synthetase 9, chloroplastic (EC:6.2.1.3); K01897 long-chain acyl-CoA synthetase [EC:6.2.1.3] (A)	Long chain acyl-CoA synthetase 9, chloroplastic OS=Arabidopsis thaliana GN=LACS9 PE=2 SV=1	AMP-binding enzyme
BnaC02T0275700WE	-0.641606	0.225395	-0.212511	0.299857	-0.889264	0.01527	0.437056	0.273233	0.1333	0.387139	1.23175	0.0935151	3-oxoacyl-[acyl-carrier-protein] synthase II, chloroplastic-like; K09458 3-oxoacyl-[acyl-carrier-protein] synthase II [EC:2.3.1.179] (A)	3-oxoacyl-[acyl-carrier-protein] synthase II, chloroplastic OS=Arabidopsis thaliana GN=KAS2 PE=1 SV=1	Beta-ketoacyl synthase, C-terminal domain
BnaC03T0108800WE	-1.10876	0.00514882	0.430397	0.137192	0.671156	0.02004	0.290946	0.0758682	0.261726	0.120779	0.572917	0.0489392	malonyl CoA-acyl carrier protein transacylase-like; K00645 [acyl-carrier-protein] S-malonyltransferase [EC:2.3.1.39] (A)	Malonyl-CoA-acyl carrier protein transacylase, mitochondrial OS=Mus musculus GN=Mcat PE=1 SV=3	Acyl transferase domain
BnaC06T0362100WE	-0.10468	0.0762568	-0.0607324	0.269575	1.32994	0.0090964	0.546254	0.0226	-0.188419	0.231344	0.111372	0.146117	very-long-chain 3-oxoacyl-CoA reductase 1; K10251 17beta-estradiol 17-dehydrogenase / very-long-chain 3-oxoacyl-CoA reductase [EC:1.1.1.62 1.1.1.330] (A)	Very-long-chain 3-oxoacyl-CoA reductase 1 OS=Arabidopsis thaliana GN=KCR1 PE=1 SV=1	short chain dehydrogenase
BnaA02T0379700WE	-0.0680617	0.386267	0.45412	0.0290661	0.617695	0.0380523	0.80057	0.0428896	1.08595	0.107032	0.345107	0.0136712	alcohol dehydrogenase-like 6; K00001 alcohol dehydrogenase [EC:1.1.1.1] (A)	Alcohol dehydrogenase-like 6 OS=Arabidopsis thaliana GN=At5g24760 PE=2 SV=2	Zinc-binding dehydrogenase
BnaA07T0362700WE	-0.453911	0.0271531	-0.310171	0.276674	-1.94288	0.0390439	0.791329	0.00470075	0.0561784	0.340185	-0.907809	0.027002	adh1; alcohol dehydrogenase class-P; K18857 alcohol dehydrogenase class-P [EC:1.1.1.1] (A)	Alcohol dehydrogenase class-P OS=Arabidopsis thaliana GN=ADH1 PE=1 SV=2	Zinc-binding dehydrogenase
BnaC03T0062400WE	-0.304761	0.256757	0.530443	0.109322	1.62566	0.0157938	0.121157	0.303338	1.53803	0.0260868	0.624663	0.0187509	cytochrome P450 86A1-like; K15401 fatty acid omega-hydroxylase [EC:1.14.-.-] (A)	Cytochrome P450 86A1 OS=Arabidopsis thaliana GN=CYP86A1 PE=1 SV=2	Cytochrome P450
BnaA05T0178200WE	0.162352	0.349227	0.295554	0.042772	1.96136	0.0208655	0.0001	0.78	0.719931	0.153822	0.693068	0.0887547	long chain acyl-CoA synthetase 2; K01897 long-chain acyl-CoA synthetase [EC:6.2.1.3] (A)	Long chain acyl-CoA synthetase 2 OS=Arabidopsis thaliana GN=LACS2 PE=2 SV=1	AMP-binding enzyme

## Sheet: (B) Sphingolipid
Table S5 B. Differentially abundant proteins related to sphingolipid. Res = clubroot resistant genotype, Sus = clubroot susceptible genotype,T = pathogen inoculated, C= uninoculated. the numbers 1, 4, and 7 indicate days post pathogen inoculation.
Proteins	Log2 fold change Res1T.C	Qvalue Res1T.C	Log2 fold change Res4T.C	Qvalue Res4T.C	Log2 fold change Res7T.C	Qvalue Res7T.C	Log2 fold change Sus1T.C	Qvalue Sus1T.C	Log2 fold change Sus4T.C	Qvalue Sus4T.C	Log2 fold change Sus7T.C	Qvalue Sus7T.C	KEGG	Swissprot	Pfam
BnaA01T0042700WE	-0.676811	0.0963129	0.168639	0.253807	-0.0868909	0.149403	0.0132106	0.350011	-0.0257805	0.0208491	0.340736	0.0206282	alkaline ceramidase 3-like; K04711 dihydroceramidase [EC:3.5.1.-] (A)	Alkaline ceramidase 3 OS=Mus musculus GN=Acer3 PE=2 SV=1	Ceramidase
BnaA01T0336900WE	-0.233433	0.117882	0.878262	0.00431705	1.8208	0.0105808	1.64541	0.244465	0.531702	0.0514768	0.966835	0.0301812	ceramidase; K12349 neutral ceramidase [EC:3.5.1.23] (A)	Cytochrome b561 and DOMON domain-containing protein At3g07570 OS=Arabidopsis thaliana GN=At3g07570 PE=2 SV=1	Eukaryotic cytochrome b561
BnaA04T0232500WE	0.37874	0.271952	0.368577	0.290799	0.46855	0.0962837	-0.486236	0.162373	-0.121761	0.314666	0.0127008	0.304134	neutral ceramidase-like; K12349 neutral ceramidase [EC:3.5.1.23] (A)	Neutral ceramidase OS=Arabidopsis thaliana GN=At2g38010 PE=3 SV=1	Neutral/alkaline non-lysosomal ceramidase, N-terminal
BnaA05T0407900WE	0.687019	0.0171484	0.390925	0.0186973	0.456016	0.0868802	-0.81884	0.175801	0.741943	0.0537209	-0.00230819	0.0163041	ceramidase; K12349 neutral ceramidase [EC:3.5.1.23] (A)	Cytochrome b561 and DOMON domain-containing protein At3g07570 OS=Arabidopsis thaliana GN=At3g07570 PE=2 SV=1	Eukaryotic cytochrome b561
BnaC02T0026300WE	-0.394938	0.0984238	0.408033	0.093238	0.856287	0.00731501	0.172838	0.168394	-0.612009	0.0531507	0.146155	0.16979	alpha-galactosidase 1; K07407 alpha-galactosidase [EC:3.2.1.22] (A)	Alpha-galactosidase 1 OS=Arabidopsis thaliana GN=AGAL1 PE=2 SV=1	Melibiase
BnaC08T0312800WE	0.390541	0.0591182	-0.664202	0.0398638	0.812284	0.0139316	-0.380936	0.091137	-0.0556815	0.377325	0.452696	0.0218526	alpha-galactosidase 3; K07407 alpha-galactosidase [EC:3.2.1.22] (A)	Alpha-galactosidase 3 OS=Arabidopsis thaliana GN=AGAL3 PE=1 SV=1	Melibiase
BnaA02T0029100WE	-1.08251	0.21698	0.373442	0.221118	0.899737	0.0336651	-0.118841	0.12293	-0.251152	0.11212	0.67707	0.0203573	alpha-galactosidase-like; K07407 alpha-galactosidase [EC:3.2.1.22] (A)	Alpha-galactosidase 2 OS=Arabidopsis thaliana GN=AGAL2 PE=1 SV=1	Melibiase
BnaA03T0048400WE	-0.480785	0.0234992	0.649519	0.00748301	1.58079	0.00749047	-0.438453	0.0547387	-0.654412	0.00983517	0.573046	0.0339491	alpha-galactosidase; K07407 alpha-galactosidase [EC:3.2.1.22] (A)	Alpha-galactosidase 1 OS=Arabidopsis thaliana GN=AGAL1 PE=2 SV=1	Melibiase
BnaA08T0196500WE	-0.106826	0.0956868	0.59697	0.0428648	0.562471	0.0757158	-0.0310476	0.268879	-0.0825243	0.0745279	0.232577	0.378347	sphingosine-1-phosphate lyase; K01634 sphinganine-1-phosphate aldolase [EC:4.1.2.27] (A)	Sphingosine-1-phosphate lyase OS=Arabidopsis thaliana GN=DPL1 PE=1 SV=1	Pyridoxal-dependent decarboxylase conserved domain
BnaA04T0040500WE	-0.158216	0.0201808	0.239025	0.00938578	1.18957	0.0188105	0.000547514	0.219172	0.0577604	0.34366	0.678565	0.0509591	beta-hexosaminidase 1-like; K12373 hexosaminidase [EC:3.2.1.52] (A)	Beta-hexosaminidase 1 OS=Arabidopsis thaliana GN=HEXO1 PE=1 SV=1	beta-acetyl hexosaminidase like
BnaA03T0467600WE	-0.414092	0.0361917	1.1082	0.0389746	1.05712	0.0389675	0.0001	0.78	0.247335	0.302395	-0.167709	0.366068	sphingosine kinase 1; K04718 sphingosine kinase [EC:2.7.1.91] (A)	Sphingosine kinase 1 OS=Arabidopsis thaliana GN=SPHK1 PE=1 SV=1	Diacylglycerol kinase catalytic domain
