# Supplementary material for: Proteome- and metabolome-level changes during early stages of clubroot infection in Brassica napus canola
Source: Royal Society of Chemistry journal article supplement (doi:10.1039/d3mo00210a), 2024-01-22
Supplement: d3mo00210a7.xlsx [file d3mo00210a7.xlsx]

## Sheet: (A) Glucosinolate
Table S6 A. Differentially abundant proteins related to glucosinolate. Res = clubroot resistant genotype, Sus = clubroot susceptible genotype,T = pathogen inoculated, C= uninoculated. the numbers 1, 4, and 7 indicate days post pathogen inoculation.
Proteins	Log2 fold change Res1T.C	Qvalue Res1T.C	Log2 fold change Res4T.C	Qvalue Res4T.C	Log2 fold change Res7T.C	Qvalue Res7T.C	Log2 fold change Sus1T.C	Qvalue Sus1T.C	Log2 fold change Sus4T.C	Qvalue Sus4T.C	Log2 fold change Sus7T.C	Qvalue Sus7T.C	KEGG	Swissprot	Pfam
BnaA04T0061300WE	0.0773075	0.156763	0.84803	0.00109988	1.11922	0.00388374	-0.281955	0.263448	-0.0735581	0.151299	0.369271	0.0287455	GO:0005506	cytochrome P450 83A1; K12156 cytochrome P450, family 83, subfamily A, polypeptide 1 [EC:1.14.-.-] (A)	Cytochrome P450 83A1 OS=Arabidopsis thaliana GN=CYP83A1 PE=1 SV=2	Cytochrome P450
BnaA05T0027100WE	0.579161	0.0447188	0.20971	0.0119478	0.786696	0.00940234	0.247906	0.245007	-0.217657	0.00510461	0.250852	0.0434844	GO:0003861	3-isopropylmalate dehydratase small subunit 1-like; K01704 3-isopropylmalate/(R)-2-methylmalate dehydratase small subunit [EC:4.2.1.33 4.2.1.35] (A)	3-isopropylmalate dehydratase small subunit 1 OS=Arabidopsis thaliana GN=IPMI2 PE=1 SV=1	Aconitase C-terminal domain
BnaA06T0031200WE	0.375222	0.119717	-0.256999	0.0385611	-1.05027	0.0304562	-1.35415	0.0229604	-0.290405	0.15654	-0.121474	0.227453	GO:0003824	branched-chain-amino-acid aminotransferase 6; K00826 branched-chain amino acid aminotransferase [EC:2.6.1.42] (A)	Branched-chain-amino-acid aminotransferase 6 OS=Arabidopsis thaliana GN=BCAT6 PE=1 SV=1	Amino-transferase class IV
BnaA07T0339600WE	0.422342	0.0261199	-0.761498	0.00932054	-0.754534	0.0145873	-0.116645	0.282081	0.0304908	0.349084	-0.220575	0.0583908	GO:0008146	cytosolic sulfotransferase 16-like; K11821 desulfoglucosinolate sulfotransferase A/B/C [EC:2.8.2.-] (A)	Cytosolic sulfotransferase 16 OS=Arabidopsis thaliana GN=SOT16 PE=1 SV=1	Sulfotransferase domain
BnaC05T0132400WE	0.337642	0.050887	0.809326	0.00869116	0.989432	0.0151155	0.316183	0.070526	-0.0815818	0.149142	0.363858	0.0070368	GO:0005506	CYP79F1, CYP79F2; dihomomethionine N-hydroxylase-like; K12154 cytochrome P450, family 79, subfamily F, polypeptide 1 [EC:1.14.13.-] (A)	Dihomomethionine N-hydroxylase OS=Arabidopsis thaliana GN=CYP79F1 PE=1 SV=1	Cytochrome P450
BnaC04T0038900WE	0.41593	0.0263343	0.489435	0.00426168	0.528739	0.00659218	-0.14915	0.237055	-0.0456753	0.2812	0.159615	0.111832	GO:0003861	3-isopropylmalate dehydratase small subunit 1-like; K01704 3-isopropylmalate/(R)-2-methylmalate dehydratase small subunit [EC:4.2.1.33 4.2.1.35] (A)	3-isopropylmalate dehydratase small subunit 1 OS=Arabidopsis thaliana GN=IPMI2 PE=1 SV=1	Aconitase C-terminal domain
BnaA03T0222500WE	0.178996	0.315375	-0.107151	0.0299935	0.281703	0.0304391	-0.167341	0.143921	0.235863	0.206875	0.0789473	0.231799	GO:0003861	3-isopropylmalate dehydratase small subunit 3; K01704 3-isopropylmalate/(R)-2-methylmalate dehydratase small subunit [EC:4.2.1.33 4.2.1.35] (A)	3-isopropylmalate dehydratase small subunit 3 OS=Arabidopsis thaliana GN=At2g43090 PE=1 SV=1	Aconitase C-terminal domain
BnaC04T0344400WE	-0.271892	0.382347	0.881618	0.0975028	1.54752	0.0171107	0.00331285	0.234467	0.132063	0.249768	0.785196	0.0155023	GO:0005506	cytochrome P450 83A1; K12156 cytochrome P450, family 83, subfamily A, polypeptide 1 [EC:1.14.-.-] (A)	Cytochrome P450 83A1 OS=Arabidopsis thaliana GN=CYP83A1 PE=1 SV=2	Cytochrome P450
BnaC08T0453600WE	0.300859	0.0184482	0.267991	0.0171217	0.375945	0.017021	-0.174886	0.042079	-0.0545132	0.105967	-0.361196	0.0108048	GO:0004499	membrane-associated guanylate kinase, WW and PDZ domain-containing protein 1; K05631 atrophin-1 interacting protein 3 (BAI1-associated protein 1) (A)	Flavin-containing monooxygenase FMO GS-OX5 OS=Arabidopsis thaliana GN=FMOGS-OX5 PE=2 SV=2	Flavin-binding monooxygenase-like
BnaA02T0052300WE	0.0332147	0.361673	0.21429	0.0258427	0.424991	0.0316838	-0.159471	0.297095	-0.24388	0.0165201	0.174355	0.046223	GO:0000287	3-isopropylmalate dehydrogenase 3, chloroplastic; K00052 3-isopropylmalate dehydrogenase [EC:1.1.1.85] (A)	3-isopropylmalate dehydrogenase 3, chloroplastic OS=Arabidopsis thaliana GN=IMDH3 PE=1 SV=1	Isocitrate/isopropylmalate dehydrogenase
BnaC05T0150600WE	0.467598	0.0305605	0.0665215	0.145973	-0.554651	0.00685119	0.327428	0.106714	-0.498924	0.0167039	-0.543001	0.00593749	GO:0008146	cytosolic sulfotransferase 16-like; K11821 desulfoglucosinolate sulfotransferase A/B/C [EC:2.8.2.-] (A)	Cytosolic sulfotransferase 17 OS=Arabidopsis thaliana GN=SOT17 PE=1 SV=1	Sulfotransferase domain
BnaC05T0202500WE	0.294997	0.0304758	0.145885	0.0162656	-0.274769	0.0112077	-0.394462	0.134891	-0.08331	0.0546916	-0.0283835	0.184344	GO:0008152	UDP-glycosyltransferase 74B1; K11820 N-hydroxythioamide S-beta-glucosyltransferase [EC:2.4.1.195] (A)	UDP-glycosyltransferase 74B1 OS=Arabidopsis thaliana GN=UGT74B1 PE=1 SV=1	UDP-glucoronosyl and UDP-glucosyl transferase
BnaC04T0152200WE	0.104628	0.362059	0.224353	0.0332255	0.250122	0.036559	-0.363752	0.178867	-0.141543	0.0249852	-0.045055	0.345932	GO:0008152	UDP-glycosyltransferase 74F2-like; K13691 pathogen-inducible salicylic acid glucosyltransferase [EC:2.4.1.-] (A)	UDP-glycosyltransferase 74C1 OS=Arabidopsis thaliana GN=UGT74C1 PE=2 SV=1	UDP-glucoronosyl and UDP-glucosyl transferase

## Sheet: (B) Glutathione
Table S6 B. Differentially abundant proteins related to glutathione. Res = clubroot resistant genotype, Sus = clubroot susceptible genotype,T = pathogen inoculated, C= uninoculated. the numbers 1, 4, and 7 indicate days post pathogen inoculation.
Proteins	Log2 fold change Res1T.C	Qvalue Res1T.C	Log2 fold change Res4T.C	Qvalue Res4T.C	Log2 fold change Res7T.C	Qvalue Res7T.C	Log2 fold change Sus1T.C	Qvalue Sus1T.C	Log2 fold change Sus4T.C	Qvalue Sus4T.C	Log2 fold change Sus7T.C	Qvalue Sus7T.C	KEGG	Swissprot	Pfam
Bnascaffold1716T0013000WE	-0.612835	0.101863	0.0658598	0.159196	1.20001	0.0312225	-0.488073	0.118688	-0.637462	0.0682103	0.495297	0.0172681	gamma-glutamyltranspeptidase 1-like; K18592 gamma-glutamyltranspeptidase / glutathione hydrolase / leukotriene-C4 hydrolase [EC:2.3.2.2 3.4.19.13 3.4.19.14] (A)	Gamma-glutamyltranspeptidase 1 OS=Arabidopsis thaliana GN=GGT1 PE=2 SV=1	Gamma-glutamyltranspeptidase
BnaA03T0516500WE	0.231772	0.23348	-0.0611622	0.303768	1.71465	0.0145092	0.119738	0.33932	0.882543	0.0379949	0.624134	0.116076	gamma-glutamyltranspeptidase 3-like; K18592 gamma-glutamyltranspeptidase / glutathione hydrolase / leukotriene-C4 hydrolase [EC:2.3.2.2 3.4.19.13 3.4.19.14] (A)	Gamma-glutamyltranspeptidase 3 OS=Arabidopsis thaliana GN=GGT3 PE=2 SV=1	Gamma-glutamyltranspeptidase
BnaA03T0070300WE	0.137353	0.0677897	-0.11821	0.273488	-1.04939	0.00977937	-0.390875	0.00502396	-0.245313	0.106301	-0.615407	0.0024956	glucose-6-phosphate 1-dehydrogenase 2, chloroplastic-like; K00036 glucose-6-phosphate 1-dehydrogenase [EC:1.1.1.49 1.1.1.363] (A)	Glucose-6-phosphate 1-dehydrogenase 2, chloroplastic OS=Arabidopsis thaliana GN=At5g13110 PE=2 SV=2	Glucose-6-phosphate dehydrogenase, NAD binding domain
BnaC07T0136500WE	0.187015	0.0146108	-0.418751	0.0866261	-1.54297	0.00305508	-0.383939	0.0169891	-0.439817	0.0588897	-0.637818	0.00491477	glucose-6-phosphate 1-dehydrogenase 3, chloroplastic-like; K00036 glucose-6-phosphate 1-dehydrogenase [EC:1.1.1.49 1.1.1.363] (A)	Glucose-6-phosphate 1-dehydrogenase 3, chloroplastic OS=Arabidopsis thaliana GN=At1g24280 PE=2 SV=2	Glucose-6-phosphate dehydrogenase, NAD binding domain
BnaC09T0029500WE	0.261197	0.0544557	0.155843	0.0780034	0.580265	0.0223689	-0.660148	0.0477929	0.3146	0.00152442	0.0733617	0.189361	glucose-6-phosphate 1-dehydrogenase, cytoplasmic isoform 1-like; K00036 glucose-6-phosphate 1-dehydrogenase [EC:1.1.1.49 1.1.1.363] (A)	Glucose-6-phosphate 1-dehydrogenase, cytoplasmic isoform 1 OS=Arabidopsis thaliana GN=ACG9 PE=2 SV=1	Glucose-6-phosphate dehydrogenase, NAD binding domain
BnaC03T0112000WE	0.0449923	0.319187	-0.327945	0.089048	-0.802002	0.0455724	0.0559996	0.360416	0.0710252	0.350461	-0.392407	0.0173207	glutathione S-transferase F10; K00799 glutathione S-transferase [EC:2.5.1.18] (A)	Glutathione S-transferase F10 OS=Arabidopsis thaliana GN=GSTF10 PE=1 SV=3	Glutathione S-transferase, C-terminal domain
BnaA04T0005200WE	-0.132826	0.30062	-0.575213	0.0555313	-0.677366	0.0188444	-0.470844	0.0400024	0.660517	0.00136043	-0.241302	0.327324	glutathione S-transferase F13; K00799 glutathione S-transferase [EC:2.5.1.18] (A)	Glutathione S-transferase F13 OS=Arabidopsis thaliana GN=GSTF13 PE=3 SV=1	Glutathione S-transferase, N-terminal domain
BnaA09T0094800WE	-0.174645	0.37446	-0.463691	0.113852	-1.13237	0.00613254	-0.0345399	0.359302	-0.696734	0.0642577	-0.828365	0.0411316	glutathione S-transferase F14; K00799 glutathione S-transferase [EC:2.5.1.18] (A)	Glutathione S-transferase F14 OS=Arabidopsis thaliana GN=GSTF14 PE=2 SV=1	Glutathione S-transferase, C-terminal domain
BnaA10T0016800WE	0.0412164	0.290667	0.475282	0.0158424	1.97805	0.0128508	0.192097	0.0505354	0.148388	0.0927363	0.768766	0.0715658	glutathione S-transferase F4; K00799 glutathione S-transferase [EC:2.5.1.18] (A)	Glutathione S-transferase F4 OS=Arabidopsis thaliana GN=GSTF4 PE=2 SV=1	Glutathione S-transferase, C-terminal domain
BnaA03T0240300WE	0.0938238	0.31935	-0.185403	0.120548	0.705936	0.00354054	0.105666	0.211476	-0.123652	0.0534166	0.0118344	0.356361	glutathione S-transferase F8, chloroplastic-like; K00799 glutathione S-transferase [EC:2.5.1.18] (A)	Glutathione S-transferase F8, chloroplastic OS=Arabidopsis thaliana GN=GSTF8 PE=1 SV=3	Glutathione S-transferase, C-terminal domain
BnaC04T0491600WE	0.364443	0.00887722	-0.486463	0.037819	-1.09974	0.00173914	2.90955	0.0597827	-0.298951	0.13916	-0.09957	0.34713	glutathione S-transferase F9-like; K00799 glutathione S-transferase [EC:2.5.1.18] (A)	Glutathione S-transferase F9 OS=Arabidopsis thaliana GN=GSTF9 PE=1 SV=1	Glutathione S-transferase, N-terminal domain
BnaA04T0188600WE	0.190237	0.0306947	-0.341103	0.0257639	-0.550588	0.00440198	0.180169	0.124797	-0.188308	0.0558082	-0.323148	0.0108339	glutathione S-transferase F9-like; K00799 glutathione S-transferase [EC:2.5.1.18] (A)	Glutathione S-transferase F9 OS=Arabidopsis thaliana GN=GSTF9 PE=1 SV=1	Glutathione S-transferase, N-terminal domain
BnaA03T0164100WE	0.481375	0.0339546	-0.234933	0.0787891	-0.828362	0.00121471	-1.4534	0.194828	-0.307955	0.0524064	-0.0905232	0.172477	glutathione S-transferase F9; K00799 glutathione S-transferase [EC:2.5.1.18] (A)	Glutathione S-transferase F9 OS=Arabidopsis thaliana GN=GSTF9 PE=1 SV=1	Glutathione S-transferase, N-terminal domain
BnaC07T0147000WE	0.254821	0.0564861	-0.420409	0.0143841	-1.09079	0.00632342	-0.258063	0.0915346	-0.00658868	0.215508	-0.388585	0.0312723	glutathione S-transferase U13-like; K00799 glutathione S-transferase [EC:2.5.1.18] (A)	Glutathione S-transferase U13 OS=Arabidopsis thaliana GN=GSTU13 PE=2 SV=1	Glutathione S-transferase, N-terminal domain
BnaA09T0417200WE	0.306881	0.156989	-0.559302	0.00379208	-0.662143	0.0142686	-0.00770945	0.331242	-0.0626379	0.0970398	-0.0302674	0.345681	glutathione S-transferase U13-like; K00799 glutathione S-transferase [EC:2.5.1.18] (A)	Glutathione S-transferase U13 OS=Arabidopsis thaliana GN=GSTU13 PE=2 SV=1	Glutathione S-transferase, C-terminal domain
BnaC06T0457200WE	0.0308669	0.353863	0.110866	0.0276759	1.14138	0.00216183	-0.248945	0.153356	-0.101756	0.129278	0.107439	0.326174	glutathione S-transferase U21-like; K00799 glutathione S-transferase [EC:2.5.1.18] (A)	Glutathione S-transferase U21 OS=Arabidopsis thaliana GN=GSTU21 PE=3 SV=1	Glutathione S-transferase, C-terminal domain
BnaA06T0115800WE	0.261276	0.0133928	-0.388964	0.0329279	-0.955709	0.00208143	-0.0243743	0.30103	-0.0556812	0.117199	-0.236003	0.0374116	glutathione S-transferase U24-like; K00799 glutathione S-transferase [EC:2.5.1.18] (A)	Glutathione S-transferase U24 OS=Arabidopsis thaliana GN=GSTU24 PE=2 SV=1	Glutathione S-transferase, C-terminal domain
BnaC08T0423300WE	0.253521	0.0110062	-0.415912	0.147146	-0.970752	0.0260565	0.25896	0.266131	0.183804	0.225635	-0.583494	0.0409638	glutathione S-transferase U24; K00799 glutathione S-transferase [EC:2.5.1.18] (A)	Glutathione S-transferase U24 OS=Arabidopsis thaliana GN=GSTU24 PE=2 SV=1	Glutathione S-transferase, C-terminal domain
BnaA04T0180100WE	0.271215	0.0215263	-0.643198	0.00264355	-0.53334	0.00426206	0.441463	0.0257599	0.0995387	0.108594	-0.480368	0.0358648	glutathione S-transferase U7; K00799 glutathione S-transferase [EC:2.5.1.18] (A)	Glutathione S-transferase U7 OS=Arabidopsis thaliana GN=GSTU7 PE=2 SV=1	Glutathione S-transferase, C-terminal domain
BnaA02T0256700WE	-0.119108	0.0776611	-0.496463	0.0443385	-0.582048	0.00179649	0.439226	0.0213481	-0.397354	0.0685686	-0.419109	0.00977792	GST1; glutathione S-transferase; K00799 glutathione S-transferase [EC:2.5.1.18] (A)	Glutathione S-transferase F3 OS=Arabidopsis thaliana GN=GSTF3 PE=2 SV=1	Glutathione S-transferase, C-terminal domain
BnaA04T0086600WE	-0.0926791	0.275759	0.166861	0.363362	-0.935707	0.0149152	-0.0931647	0.216915	0.319921	0.0294741	-0.202634	0.137921	microsomal glutathione S-transferase 3-like; K00799 glutathione S-transferase [EC:2.5.1.18] (A)	Microsomal glutathione S-transferase 3 OS=Mus musculus GN=Mgst3 PE=1 SV=1	MAPEG family
BnaC05T0072100WE	-0.607471	0.0107124	-0.434933	0.12701	-0.82422	0.00571751	0.361023	0.0534173	0.239394	0.0218657	0.0412848	0.305277	probable elongation factor 1-gamma 1; K03233 elongation factor 1-gamma (A)	Probable elongation factor 1-gamma 1 OS=Arabidopsis thaliana GN=At1g09640 PE=2 SV=1	Glutathione S-transferase, C-terminal domain
BnaA06T0057200WE	-0.208639	0.0126617	-0.243911	0.0193805	-0.517693	0.00727686	-0.143829	0.00186042	-0.147065	0.016151	-0.260956	0.0580841	probable elongation factor 1-gamma 1; K03233 elongation factor 1-gamma (A)	Probable elongation factor 1-gamma 1 OS=Arabidopsis thaliana GN=At1g09640 PE=2 SV=1	Glutathione S-transferase, C-terminal domain
BnaA03T0167800WE	0.059059	0.21254	-0.510078	0.0279041	-0.770643	0.0167015	0.544304	0.278098	0.160726	0.256385	0.396821	0.212205	probable glutathione peroxidase 2; K00432 glutathione peroxidase [EC:1.11.1.9] (A)	Probable glutathione peroxidase 2 OS=Arabidopsis thaliana GN=GPX2 PE=1 SV=1	Glutathione peroxidase
