# Supplementary material for: Proteome- and metabolome-level changes during early stages of clubroot infection in Brassica napus canola
Source: Royal Society of Chemistry journal article supplement (doi:10.1039/d3mo00210a), 2024-01-22
Supplement: d3mo00210a8.xlsx [file d3mo00210a8.xlsx]

## Sheet: (A) Chromosome A03
Table S7 A. Differentially abundant proteins in chromosome A03. Res = clubroot resistant genotype, Sus = clubroot susceptible genotype,T = pathogen inoculated, C= uninoculated. the number 7 indicates days post pathogen inoculation.
Proteins	Log2 fold change Res1T.C	Qvalue Res1T.C	Log2 fold change Res4T.C	Qvalue Res4T.C	Log2 fold change Res7T.C	Qvalue Res7T.C	Log2 fold change Sus1T.C	Qvalue Sus1T.C	Log2 fold change Sus4T.C	Qvalue Sus4T.C	Log2 fold change Sus7T.C	Qvalue Sus7T.C	KEGG	Swissprot	Pfam
BnaA03T0145200WE	0.184637	0.0725509	-0.372927	0.161793	-2.09332	0.00147728	0.0243519	0.380119	-0.997413	0.0533603	-1.2692	0.00126781	glutamate synthase 1 [NADH], chloroplastic; K00264 glutamate synthase (NADPH/NADH) [EC:1.4.1.13 1.4.1.14] (A)	Glutamate synthase 1 [NADH], chloroplastic OS=Arabidopsis thaliana GN=GLT1 PE=2 SV=2	Pyridine nucleotide-disulphide oxidoreductase
BnaA03T0226100WE	-0.25249	0.0307824	-0.707108	0.0464392	-1.89306	0.0122018	0.295176	0.108379	-0.0151577	0.381353	-0.758062	0.00859193	acyl-[acyl-carrier-protein] desaturase, chloroplastic (EC:1.14.19.2); K03921 acyl-[acyl-carrier-protein] desaturase [EC:1.14.19.2 1.14.19.11 1.14.19.26] (A)	Acyl-[acyl-carrier-protein] desaturase, chloroplastic OS=Brassica napus PE=2 SV=1	Fatty acid desaturase
BnaA03T0105500WE	-0.0409305	0.28279	-0.393528	0.229124	-1.72851	0.021402	0.361771	0.00992989	-0.0779562	0.31401	-0.644127	0.0299783	sucrose synthase 1-like; K00695 sucrose synthase [EC:2.4.1.13] (A)	Sucrose synthase 1 OS=Arabidopsis thaliana GN=SUS1 PE=1 SV=3	Glycosyl transferases group 1
BnaA03T0089900WE	-0.211166	0.00243969	-0.223418	0.289734	-1.27665	0.0214517	0.237645	0.109251	-0.0248338	0.304934	-0.644212	0.0170931	UTP--glucose-1-phosphate uridylyltransferase 1; K00963 UTP--glucose-1-phosphate uridylyltransferase [EC:2.7.7.9] (A)	UTP--glucose-1-phosphate uridylyltransferase 1 OS=Arabidopsis thaliana GN=At5g17310 PE=2 SV=1	UTP--glucose-1-phosphate uridylyltransferase
BnaA03T0166500WE	-0.130285	0.0443991	-0.369456	0.0866608	-1.265	0.0034358	0.0360176	0.344972	-0.111416	0.233665	-0.28234	0.021564	probable fructokinase-1; K00847 fructokinase [EC:2.7.1.4] (A)	Probable fructokinase-1 OS=Arabidopsis thaliana GN=At2g31390 PE=2 SV=1	pfkB family carbohydrate kinase
BnaA03T0070300WE	0.137353	0.0677897	-0.11821	0.273488	-1.04939	0.00977937	-0.390875	0.00502396	-0.245313	0.106301	-0.615407	0.0024956	glucose-6-phosphate 1-dehydrogenase 2, chloroplastic-like; K00036 glucose-6-phosphate 1-dehydrogenase [EC:1.1.1.49 1.1.1.363] (A)	Glucose-6-phosphate 1-dehydrogenase 2, chloroplastic OS=Arabidopsis thaliana GN=At5g13110 PE=2 SV=2	Glucose-6-phosphate dehydrogenase, NAD binding domain
BnaA03T0497200WE	-0.409492	0.0451395	-0.301441	0.230417	-1.0409	0.00274147	0.493136	0.27496	0.156684	0.3284	-0.512701	0.00660445	arginine--tRNA ligase, cytoplasmic-like; K01887 arginyl-tRNA synthetase [EC:6.1.1.19] (A)	Arginine--tRNA ligase, chloroplastic/mitochondrial OS=Arabidopsis thaliana GN=EMB1027 PE=3 SV=1	Arginyl tRNA synthetase N terminal domain
BnaA03T0192700WE	-0.48729	0.032693	-0.304627	0.0173916	-0.985979	0.00216849	-0.637109	0.116425	0.0517928	0.0639902	-0.846915	0.0198245	RNA-binding protein CP29B, chloroplastic-like; K11294 nucleolin (A)	RNA-binding protein CP29B, chloroplastic OS=Arabidopsis thaliana GN=CP29B PE=1 SV=1	RNA recognition motif. (a.k.a. RRM, RBD, or RNP domain)
BnaA03T0131700WE	0.0660412	0.109578	-0.36379	0.108598	-0.923622	0.0174374	-0.4049	0.0905571	0.0496556	0.301571	-0.593986	0.0126905	probable pyruvate kinase, cytosolic isozyme; K00873 pyruvate kinase [EC:2.7.1.40] (A)	Probable pyruvate kinase, cytosolic isozyme OS=Arabidopsis thaliana GN=At4g26390 PE=3 SV=1	Pyruvate kinase, alpha/beta domain
BnaA03T0357500WE	-0.0253105	0.368882	-0.176709	0.187308	-0.877212	0.00587988	-0.280219	0.199183	-0.19402	0.148679	-0.272969	0.0127768	aquaporin TIP2-1-like; K09873 aquaporin TIP (A)	Aquaporin TIP2-1 OS=Arabidopsis thaliana GN=TIP2-1 PE=1 SV=2	Major intrinsic protein
BnaA03T0235400WE	0.0290735	0.216871	-0.0979034	0.200599	-0.841314	0.00235878	0.316412	0.128608	-0.338889	0.0658866	-0.333154	0.0146169	39S ribosomal protein L46, mitochondrial-like; K17427 large subunit ribosomal protein L46 (A)	39S ribosomal protein L46, mitochondrial OS=Pongo abelii GN=MRPL46 PE=2 SV=1	39S mitochondrial ribosomal protein L46
BnaA03T0344800WE	0.0887039	0.304278	-0.130432	0.284573	-0.785405	0.00304531	-0.343828	0.0146562	0.0349816	0.167859	-0.365233	0.0313431	uncharacterized LOC105790132; K20102 YTH domain-containing family protein (A)	YTH domain-containing family protein 2 OS=Mus musculus GN=Ythdf2 PE=2 SV=1	YT521-B-like domain
BnaA03T0029200WE	0.185321	0.0653117	-0.0771047	0.287585	-0.755469	0.00471102	-0.191538	0.103998	-0.138788	0.109644	-0.583725	0.00200708	anthranilate synthase alpha subunit 1, chloroplastic; K01657 anthranilate synthase component I [EC:4.1.3.27] (A)	Anthranilate synthase alpha subunit 1, chloroplastic OS=Arabidopsis thaliana GN=ASA1 PE=1 SV=1	Anthranilate synthase component I, N terminal region
BnaA03T0093400WE	0.171486	0.195474	-0.427536	0.0455839	-0.743865	0.0103853	-0.364207	0.014279	0.0689616	0.381499	-0.600295	0.0206337	--	Anamorsin homolog OS=Arabidopsis thaliana GN=At5g18400 PE=1 SV=1	Cytokine-induced anti-apoptosis inhibitor 1, Fe-S biogenesis
BnaA03T0286400WE	-0.452225	0.0194104	-1.04217	0.00256988	-0.696336	0.00451762	-0.0781842	0.265478	-0.0148676	0.317763	-0.444479	0.0440652	60S acidic ribosomal protein P1-2; K02942 large subunit ribosomal protein LP1 (A)	60S acidic ribosomal protein P1-2 OS=Arabidopsis thaliana GN=RPP1B PE=1 SV=2	60s Acidic ribosomal protein
BnaA03T0165100WE	-0.523612	0.0294663	-0.0950594	0.230041	-0.6427	0.0244178	-0.269087	0.164401	-0.57139	0.0556644	-0.166018	0.0384142	GTP-binding protein TypA/BipA homolog; K06207 GTP-binding protein (A)	GTP-binding protein TypA/BipA homolog OS=Helicobacter pylori (strain ATCC 700392 / 26695) GN=typA PE=3 SV=1	Elongation factor Tu domain 2
BnaA03T0070400WE	0.0861923	0.303376	-0.365682	0.116337	-0.612497	0.0105489	-0.0827406	0.0718427	-0.211149	0.183889	0.301476	0.0409313	photosynthetic NDH subunit of lumenal location 5, chloroplastic; K03768 peptidyl-prolyl cis-trans isomerase B (cyclophilin B) [EC:5.2.1.8] (A)	Photosynthetic NDH subunit of lumenal location 5, chloroplastic OS=Arabidopsis thaliana GN=PNSL5 PE=1 SV=1	Cyclophilin type peptidyl-prolyl cis-trans isomerase/CLD
BnaA03T0334300WE	0.136115	0.0435373	-0.104844	0.16611	-0.608266	0.00379706	0.0486118	0.327114	0.0451101	0.0766112	0.155165	0.0498109	eukaryotic translation initiation factor 3 subunit G-like; K03248 translation initiation factor 3 subunit G (A)	Eukaryotic translation initiation factor 3 subunit G OS=Xenopus tropicalis GN=eif3g PE=2 SV=1	RNA recognition motif. (a.k.a. RRM, RBD, or RNP domain)
BnaA03T0407800WE	-0.621533	0.0342446	0.164801	0.205278	-0.602881	0.0313609	-0.347166	0.274739	0.0072845	0.234005	-0.51941	0.0375615	40S ribosomal protein S25-3; K02975 small subunit ribosomal protein S25e (A)	40S ribosomal protein S25-3 OS=Arabidopsis thaliana GN=RPS25D PE=3 SV=2	S25 ribosomal protein
BnaA03T0038000WE	0.0951108	0.139161	-0.178547	0.0772219	0.633135	0.0307947	0.141858	0.23829	-0.395957	0.154296	0.404859	0.0277745	syntaxin-132; K08486 syntaxin 1B/2/3 (A)	Syntaxin-132 OS=Arabidopsis thaliana GN=SYP132 PE=1 SV=1	Syntaxin
BnaA03T0417300WE	0.0762529	0.185171	0.118412	0.0865278	0.683775	0.00336019	-0.296341	0.009159	0.31001	0.0357712	0.265475	0.0367657	Leucine-rich repeat protein kinase family protein, putative; K13420 LRR receptor-like serine/threonine-protein kinase FLS2 [EC:2.7.11.1] (A)	Leucine-rich repeat receptor protein kinase MSP1 OS=Oryza sativa subsp. japonica GN=MSP1 PE=1 SV=1	Leucine rich repeat N-terminal domain
BnaA03T0393400WE	-0.328742	0.188033	0.193909	0.241466	0.745625	0.0409489	0.324194	0.0302429	0.133283	0.0405085	0.512442	0.0422482	RPM1-interacting protein 4; K13456 RPM1-interacting protein 4 (A)	RPM1-interacting protein 4 OS=Arabidopsis thaliana GN=RIN4 PE=1 SV=1	Cleavage site for pathogenic type III effector avirulence factor Avr
BnaA03T0396800WE	-0.330431	0.0656204	-0.145929	0.134815	0.966696	0.00821116	-0.35982	0.0323555	-0.200591	0.0884816	0.465528	0.0190791	serine/threonine-protein phosphatase 2A 65 kDa regulatory subunit A beta isoform-like; K03456 serine/threonine-protein phosphatase 2A regulatory subunit A (A)	Fasciclin-like arabinogalactan protein 7 OS=Arabidopsis thaliana GN=FLA7 PE=1 SV=1	Fasciclin domain
BnaA03T0004900WE	0.703922	0.072365	0.39602	0.0276008	0.993549	0.00794359	-0.215942	0.185727	0.210011	0.238631	0.444847	0.011476	heat shock family protein; K13993 HSP20 family protein (A)	Inactive protein RESTRICTED TEV MOVEMENT 2 OS=Arabidopsis thaliana GN=RTM2 PE=3 SV=1	Hsp20/alpha crystallin family
BnaA03T0255400WE	0.143331	0.20347	0.0869179	0.342481	1.0612	0.0058705	-0.0962738	0.343026	-0.744701	0.00301886	0.214214	0.0308007	manganese-dependent ADP-ribose/CDP-alcohol diphosphatase; K01517 manganese-dependent ADP-ribose/CDP-alcohol diphosphatase [EC:3.6.1.13 3.6.1.16 3.6.1.53] (A)	High-affinity nitrate transporter 3.1 OS=Arabidopsis thaliana GN=NRT3.1 PE=1 SV=1	--
BnaA03T0043100WE	-0.804335	0.121962	-0.158914	0.259808	1.13949	0.0128026	-0.653205	0.0359587	0.38766	0.141751	0.393958	0.0185067	40S ribosomal protein S15-3-like; K02958 small subunit ribosomal protein S15e (A)	40S ribosomal protein S15-3 OS=Arabidopsis thaliana GN=RPS15C PE=2 SV=1	Ribosomal protein S19
BnaA03T0358700WE	-0.311582	0.102901	0.829496	0.055419	1.18518	0.0243192	0.150126	0.0402689	-0.167293	0.0762419	0.527118	0.0352734	--	Rapid alkalinization factor 23 OS=Arabidopsis thaliana GN=RALF23 PE=1 SV=1	Rapid ALkalinization Factor (RALF)
BnaA03T0259800WE	1.5389	0.070302	-0.0136452	0.374558	1.20666	0.00747413	-0.454487	0.161248	-0.0264182	0.0693091	0.534148	0.0186336	arginase 1, mitochondrial; K01476 arginase [EC:3.5.3.1] (A)	Arginase 1, mitochondrial OS=Arabidopsis thaliana GN=ARGAH1 PE=2 SV=1	Arginase family
BnaA03T0002900WE	-0.142493	0.137937	0.416261	0.0800014	1.23367	0.00416514	-1.26907	0.0688236	1.61087	0.00582918	0.585276	0.0121912	glucomannan 4-beta-mannosyltransferase 9-like; K13680 beta-mannan synthase [EC:2.4.1.32] (A)	Glucomannan 4-beta-mannosyltransferase 9 OS=Arabidopsis thaliana GN=CSLA9 PE=2 SV=1	Glycosyltransferase like family 2
BnaA03T0480700WE	-0.275048	0.0885804	0.512466	0.00147285	1.33663	0.0122418	-0.0467799	0.298382	-0.0748404	0.251678	0.59934	0.0256388	hypothetical protein; K19027 zinc finger FYVE domain-containing protein 26 (A)	Dirigent protein 6 OS=Arabidopsis thaliana GN=DIR6 PE=1 SV=1	Dirigent-like protein
BnaA03T0565900WE	-0.166154	0.208249	0.327039	0.0189401	1.38853	0.00939045	0.031106	0.150538	0.111803	0.0546568	0.432608	0.0446468	hypothetical protein; K13110 microfibrillar-associated protein 1 (A)	PI-PLC X domain-containing protein At5g67130 OS=Arabidopsis thaliana GN=At5g67130 PE=1 SV=1	Phosphatidylinositol-specific phospholipase C, X domain
BnaA03T0280700WE	-0.579036	0.034457	-0.656872	0.06649	1.44651	0.0147446	-0.222071	0.247998	0.609391	0.0825559	0.591565	0.0345587	POPTRDRAFT_662518; hypothetical protein; K12126 phytochrome-interacting factor 3 (A)	Transcription factor UNE12 OS=Arabidopsis thaliana GN=UNE12 PE=2 SV=2	Helix-loop-helix DNA-binding domain
BnaA03T0189000WE	0.0840836	0.106824	-0.415517	0.108543	1.47623	0.0196765	0.110942	0.193912	-0.139313	0.384176	1.08135	0.0185744	ankyrin repeat domain-containing protein 30A; K19748 RAB6-interacting golgin (A)	--	Transcriptional activator
BnaA03T0292800WE	0.192737	0.146011	0.901202	0.0190008	1.51005	0.00159538	-0.112568	0.31752	-0.116605	0.363266	0.748367	0.0420201	uncharacterized LOC103421379; K17609 nucleoredoxin [EC:1.8.1.8] (A)	Protein SIEVE ELEMENT OCCLUSION A OS=Arabidopsis thaliana GN=SEOA PE=1 SV=1	Sieve element occlusion N-terminus
BnaA03T0048400WE	-0.480785	0.0234992	0.649519	0.00748301	1.58079	0.00749047	-0.438453	0.0547387	-0.654412	0.00983517	0.573046	0.0339491	alpha-galactosidase; K07407 alpha-galactosidase [EC:3.2.1.22] (A)	Alpha-galactosidase 1 OS=Arabidopsis thaliana GN=AGAL1 PE=2 SV=1	Melibiase
BnaA03T0289500WE	0.585109	0.287027	0.560509	0.0172625	1.59623	0.0124056	-0.967084	0.0216099	-0.0262873	0.0931755	1.0634	0.0200617	rasa4; RAS p21 protein activator 4; K17630 Ras GTPase-activating protein 4 (A)	Protein QUIRKY OS=Arabidopsis thaliana GN=QKY PE=2 SV=1	C2 domain
BnaA03T0558000WE	0.0899981	0.251551	0.596519	0.00914804	1.85837	0.00535928	-0.618105	0.00163584	0.199094	0.151548	0.640039	0.042069	phospholipase D delta-like; K01115 phospholipase D1/2 [EC:3.1.4.4] (A)	Phospholipase D delta OS=Arabidopsis thaliana GN=PLDDELTA PE=1 SV=2	Phospholipase D Active site motif
BnaA03T0096500WE	0.0169034	0.0787789	0.742771	0.00629245	1.90405	0.020515	0.396564	0.301212	-0.184955	0.0487553	1.59922	0.0265689	--	--	AWPM-19-like family
BnaA03T0125800WE	-0.547011	0.349865	0.459041	0.00891647	2.108	0.00569705	-1.16594	0.130452	0.370278	0.134357	1.01296	0.0226237	--	--	BNR repeat-like domain

## Sheet: (B) Chromosome A08
Table S7 B. Differentially abundant proteins in chromosome A08. Res = clubroot resistant genotype, Sus = clubroot susceptible genotype,T = pathogen inoculated, C= uninoculated. the number 7 indicates days post pathogen inoculation.
Proteins	Log2 fold change Res1T.C	Qvalue Res1T.C	Log2 fold change Res4T.C	Qvalue Res4T.C	Log2 fold change Res7T.C	Qvalue Res7T.C	Log2 fold change Sus1T.C	Qvalue Sus1T.C	Log2 fold change Sus4T.C	Qvalue Sus4T.C	Log2 fold change Sus7T.C	Qvalue Sus7T.C	KEGG	Swissprot	Pfam
BnaA08T0003800WE	-0.231606	0.0252139	-0.630761	0.0107265	-0.419742	0.0179941	0.235042	0.0433582	-0.180817	0.0766984	-0.217701	0.00228469	nucleoside diphosphate kinase 1; K00940 nucleoside-diphosphate kinase [EC:2.7.4.6] (A)	Nucleoside diphosphate kinase 1 OS=Arabidopsis thaliana GN=NDK1 PE=1 SV=1	Nucleoside diphosphate kinase
BnaA08T0007400WE	-0.0645863	0.19728	0.795571	0.0116687	1.58809	0.0181248	0.51884	0.0970241	0.0443672	0.305304	0.952176	0.0382726	hypothetical protein; K01870 isoleucyl-tRNA synthetase [EC:6.1.1.5] (A)	Dirigent protein 20 OS=Arabidopsis thaliana GN=DIR20 PE=2 SV=1	Dirigent-like protein
BnaA08T0010900WE	0.194741	0.0461817	-0.14078	0.119452	-0.599404	0.0125447	0.464029	0.052962	-0.159958	0.288884	0.250325	0.0365062	oligouridylate-binding protein 1A-like; K13201 nucleolysin TIA-1/TIAR (A)	Oligouridylate-binding protein 1A OS=Arabidopsis thaliana GN=UBP1A PE=1 SV=1	RNA recognition motif. (a.k.a. RRM, RBD, or RNP domain)
BnaA08T0050300WE	-0.409898	0.156476	-1.08348	0.0178726	-1.00864	0.0192157	-0.332451	0.342763	-0.288415	0.17156	-0.0343717	0.0262024	RPS19; 40S ribosomal protein S19; K02965 small subunit ribosomal protein S19 (A)	Glycine-rich RNA-binding protein 2, mitochondrial OS=Arabidopsis thaliana GN=RBG2 PE=1 SV=1	RNA recognition motif. (a.k.a. RRM, RBD, or RNP domain)
BnaA08T0054800WE	-0.0168157	0.0907282	1.3998	0.0024372	2.23025	0.000704068	0.544461	0.289745	-0.133778	0.291556	0.858643	0.0207145	uncharacterized LOC104585983; K03189 urease accessory protein (A)	Cytochrome b561 and DOMON domain-containing protein At4g12980 OS=Arabidopsis thaliana GN=At4g12980 PE=2 SV=1	Eukaryotic cytochrome b561
BnaA08T0074600WE	0.199268	0.0298571	-0.0489677	0.225979	-0.620406	0.00258891	-0.272174	0.0948498	-0.115206	0.0952426	-0.38081	0.0195282	selenium-binding protein 1; K17285 selenium-binding protein 1 (A)	Selenium-binding protein 1 OS=Arabidopsis thaliana GN=SBP1 PE=1 SV=1	56kDa selenium binding protein (SBP56)
BnaA08T0076700WE	-0.122184	0.279305	0.057914	0.331257	0.750014	0.0138063	-0.677518	0.0390633	-0.19705	0.0614713	-0.358282	0.00196845	primary amine oxidase-like; K00276 primary-amine oxidase [EC:1.4.3.21] (A)	Primary amine oxidase OS=Pisum sativum PE=1 SV=1	Copper amine oxidase, N3 domain
BnaA08T0082600WE	0.339576	0.123358	0.536897	0.103145	0.906262	0.0343982	-0.283351	0.106171	-0.139969	0.165935	0.755794	0.00738291	putative caffeoyl-CoA O-methyltransferase At1g67980; K00588 caffeoyl-CoA O-methyltransferase [EC:2.1.1.104] (A)	Putative caffeoyl-CoA O-methyltransferase At1g67980 OS=Arabidopsis thaliana GN=At1g67980 PE=2 SV=1	O-methyltransferase
BnaA08T0084700WE	0.0473854	0.378285	-0.22406	0.0420581	-0.540807	0.00853244	-0.502434	0.106003	0.0171658	0.379761	-0.391475	0.0345174	OASA4; cysteine synthase; K01738 cysteine synthase A [EC:2.5.1.47] (A)	Cysteine synthase OS=Brassica juncea PE=2 SV=1	Pyridoxal-phosphate dependent enzyme
BnaA08T0098300WE	0.275412	0.0989405	-0.83766	0.00850191	-0.686806	0.00639795	-0.0975313	0.310172	-0.0227013	0.385045	-0.195231	0.0291326	probable H/ACA ribonucleoprotein complex subunit 1; K13199 plasminogen activator inhibitor 1 RNA-binding protein (A)	--	Stm1
BnaA08T0102300WE	0.351497	0.166294	-0.0508809	0.176491	0.50762	0.0194248	-0.741751	0.0388741	0.126635	0.209545	-0.371273	0.0236373	gak; cyclin G associated kinase; K08855 cyclin G-associated kinase [EC:2.7.11.1] (A)	Auxilin-related protein 2 OS=Arabidopsis thaliana GN=At4g12770 PE=1 SV=1	DnaJ domain
BnaA08T0110100WE	0.0999193	0.079496	-0.648517	0.0108539	-0.345054	0.00497081	-0.392401	0.00926692	0.00961151	0.115899	0.0941445	0.0417127	FAM10 family protein At4g22670-like; K09560 suppressor of tumorigenicity protein 13 (A)	FAM10 family protein At4g22670 OS=Arabidopsis thaliana GN=At4g22670 PE=1 SV=1	Tetratricopeptide repeat
BnaA08T0120800WE	0.149984	0.138362	-0.638552	0.00839019	0.598703	0.0266585	-1.31583	0.173711	0.211197	0.152988	0.374806	0.0134949	caffeoyl-CoA O-methyltransferase 1-like; K00588 caffeoyl-CoA O-methyltransferase [EC:2.1.1.104] (A)	Caffeoyl-CoA O-methyltransferase 1 OS=Arabidopsis thaliana GN=CCOAOMT1 PE=1 SV=1	O-methyltransferase
BnaA08T0135300WE	0.324158	0.154594	-0.465141	0.25851	-0.104575	0.0235485	-0.290992	0.0755647	0.71808	0.00372322	0.0609679	0.0207412	gamma-tubulin complex component 2; K16569 gamma-tubulin complex component 2 (A)	--	Protein of unknown function (DUF1068)
BnaA08T0137900WE	0.215587	0.210466	-1.09577	0.0508451	-1.35331	0.0172351	-0.541522	0.171703	-1.27315	0.00237066	-0.656227	0.0088532	GMP synthase (EC:6.3.5.2); K01951 GMP synthase (glutamine-hydrolysing) [EC:6.3.5.2] (A)	Putative glutamine amidotransferase YLR126C OS=Saccharomyces cerevisiae (strain ATCC 204508 / S288c) GN=YLR126C PE=1 SV=1	Glutamine amidotransferase class-I
BnaA08T0149800WE	1.43369	0.10268	-0.960641	0.180523	-3.62682	0.0285338	0.527677	0.246361	0.0759506	0.360633	-2.55849	0.0116097	asns; asparagine synthetase; K01953 asparagine synthase (glutamine-hydrolysing) [EC:6.3.5.4] (A)	Stem-specific protein TSJT1 OS=Nicotiana tabacum GN=TSJT1 PE=2 SV=1	Aluminium induced protein
BnaA08T0151200WE	0.188805	0.0203503	-0.0421699	0.310034	-0.428783	0.0112803	-0.0589891	0.25647	-0.501332	0.0413663	-0.455069	0.0278722	aconitate hydratase 3, mitochondrial-like; K01681 aconitate hydratase [EC:4.2.1.3] (A)	Aconitate hydratase 3, mitochondrial OS=Arabidopsis thaliana GN=ACO3 PE=2 SV=3	Aconitase C-terminal domain
BnaA08T0170800WE	-0.133433	0.0599657	-0.269261	0.00972951	-0.623444	0.00193807	-0.000353478	0.153998	-0.164175	0.0583857	-0.332181	0.0482343	heat shock 70 kDa protein 9, mitochondrial-like; K04043 molecular chaperone DnaK (A)	Heat shock 70 kDa protein 9, mitochondrial OS=Arabidopsis thaliana GN=HSP70-9 PE=2 SV=1	Hsp70 protein
BnaA08T0173500WE	0.364747	0.195561	0.458498	0.113041	0.54261	0.0121398	-0.496152	0.00630939	0.360374	0.213758	0.68898	0.0403186	ABC transporter D family member 1; K05677 ATP-binding cassette, subfamily D (ALD), member 3 (A)	ABC transporter D family member 1 OS=Arabidopsis thaliana GN=ABCC1 PE=1 SV=1	ABC transporter
BnaA08T0173700WE	-0.127222	0.351654	-0.516147	0.0599724	-0.288013	0.0261562	0.050988	0.248825	-0.0502129	0.097328	0.480128	0.0292487	transmembrane 9 superfamily protein member; K17087 transmembrane 9 superfamily member 3 (A)	Trafficking protein particle complex subunit 12 OS=Homo sapiens GN=TRAPPC12 PE=1 SV=3	TPR repeat
BnaA08T0175200WE	-0.00303197	0.0380903	0.28475	0.0119462	0.166449	0.0216072	-0.698193	0.0231179	0.0676729	0.272944	0.164899	0.00411412	coatomer subunit alpha-2-like; K05236 coatomer protein complex, subunit alpha (xenin) (A)	Coatomer subunit alpha-1 OS=Arabidopsis thaliana GN=At1g62020 PE=2 SV=2	WD domain, G-beta repeat
BnaA08T0220400WE	0.0852083	0.362152	-0.327803	0.0544189	1.0357	0.0334042	-0.202308	0.0402688	-0.0602621	0.229141	0.861958	0.0280532	GRMZM2G410991; uncharacterized LOC100384051; K13473 chitin elicitor-binding protein (A)	LysM domain-containing GPI-anchored protein 1 OS=Arabidopsis thaliana GN=LYM1 PE=1 SV=1	LysM domain
BnaA08T0252200WE	-0.542081	0.00455989	-1.09017	0.0262093	-0.881785	0.0198128	-0.120521	0.230386	-0.522653	0.021641	-0.327379	0.0209145	glyceraldehyde-3-phosphate dehydrogenase, cytosolic-like; K00134 glyceraldehyde 3-phosphate dehydrogenase [EC:1.2.1.12] (A)	Glyceraldehyde-3-phosphate dehydrogenase, cytosolic OS=Sinapis alba GN=GAPC PE=2 SV=2	Glyceraldehyde 3-phosphate dehydrogenase, NAD binding domain
BnaA08T0254300WE	0.00415859	0.366002	0.611822	0.0452477	3.65037	0.0041083	-1.02666	0.0394099	-0.00197946	0.272356	0.945442	0.0449064	high affinity nitrate transporter 2.5; K02575 MFS transporter, NNP family, nitrate/nitrite transporter (A)	High affinity nitrate transporter 2.5 OS=Arabidopsis thaliana GN=NRT2.5 PE=2 SV=1	Major Facilitator Superfamily
BnaA08T0259600WE	-0.763575	0.00690312	-0.223487	0.237987	0.505839	0.0143556	0.050264	0.0808786	0.0370049	0.33954	-0.840283	0.0155311	proline synthase co-transcribed bacterial homolog protein-like; K06997 PLP dependent protein (A)	Proline synthase co-transcribed bacterial homolog protein OS=Mus musculus GN=Prosc PE=1 SV=1	Alanine racemase, N-terminal domain
BnaA08T0271700WE	-0.0323842	0.201719	-0.231801	0.00737368	-0.693767	0.0022602	-0.0190443	0.191612	-0.0455771	0.160912	-0.331636	0.0166355	2,3-bisphosphoglycerate-independent phosphoglycerate mutase 1; K15633 2,3-bisphosphoglycerate-independent phosphoglycerate mutase [EC:5.4.2.12] (A)	2,3-bisphosphoglycerate-independent phosphoglycerate mutase 1 OS=Arabidopsis thaliana GN=PGM1 PE=2 SV=3	COBRA-like protein
BnaA08T0272100WE	-0.82612	0.0834703	0.0229361	0.281514	0.289868	0.0363037	0.541557	0.0185571	0.121314	0.28812	0.0909878	0.0481826	--	Universal stress protein A-like protein OS=Arabidopsis thaliana GN=At3g01520 PE=1 SV=2	Universal stress protein family
BnaA08T0276200WE	-0.343223	0.312842	-0.377503	0.0958585	0.701627	0.0142852	0.261442	0.278399	0.118113	0.166811	0.626485	0.0149112	nuclear transcription factor Y subunit C-9-like; K08066 nuclear transcription factor Y, gamma (A)	Nuclear transcription factor Y subunit C-9 OS=Arabidopsis thaliana GN=NFYC9 PE=2 SV=1	Histone-like transcription factor (CBF/NF-Y) and archaeal histone

## Sheet: (C) CR QTL
Table S7 C. Differentially abundant proteins that are homologous to known clubroot resistant (CR) QTLs. Res = clubroot resistant genotype, Sus = clubroot susceptible genotype,T = pathogen inoculated, C= uninoculated. the number 7 indicates days post pathogen inoculation. Corresponding QTL position is based on Brassica rapa 'Chiifu' V3.0 referene genome (http://brassicadb.cn/#/syntenic-gene/), the…
Proteins	Corresponding Chromosome Location	Log2 fold change Res1T.C	Qvalue Res1T.C	Log2 fold change Res4T.C	Qvalue Res4T.C	Log2 fold change Res7T.C	Qvalue Res7T.C	Log2 fold change Sus1T.C	Qvalue Sus1T.C	Log2 fold change Sus4T.C	Qvalue Sus4T.C	Log2 fold change Sus7T.C	Qvalue Sus7T.C	KEGG	Swissprot	Pfam
BnaC06T0191100WE	Brara_Chiifu_V3.0_A03_23823130_26806601_Rcr4	-0.399932	0.0340459	-1.30307	0.0968574	-2.24827	0.0245567	3.7193	0.143005	-0.0375437	0.0556713	-1.0938	0.027076	L-lactate dehydrogenase B-like; K00016 L-lactate dehydrogenase [EC:1.1.1.27] (A)	L-lactate dehydrogenase B (Fragment) OS=Hordeum vulgare PE=1 SV=1	lactate/malate dehydrogenase, alpha/beta C-terminal domain
BnaC01T0174300WE	Brara_Chiifu_V3.0_A03_23823130_26806601_Rcr4	-0.133877	0.0357366	-0.80816	0.167903	-2.19043	0.0329038	0.466071	0.00886447	0.457174	0.0600233	-0.964187	0.0164075	L-lactate dehydrogenase B-like; K00016 L-lactate dehydrogenase [EC:1.1.1.27] (A)	L-lactate dehydrogenase B (Fragment) OS=Hordeum vulgare PE=1 SV=1	lactate/malate dehydrogenase, alpha/beta C-terminal domain
BnaA01T0040100WE	Brara_Chiifu_V3.0_A03_25523177_25752008_CRa	0.195841	0.116727	-0.486606	0.118744	-1.89941	0.0134461	0.318267	0.271878	-1.28345	0.0105735	-0.837133	0.0252788	5'-adenylylsulfate reductase 3, chloroplastic-like; K05907 adenylyl-sulfate reductase (glutathione) [EC:1.8.4.9] (A)	5'-adenylylsulfate reductase 3, chloroplastic OS=Arabidopsis thaliana GN=APR3 PE=2 SV=2	Thioredoxin
BnaA07T0358600WE	Brara_Chiifu_V3.0_A08_11385371_11627069_Rcr3	-0.224842	0.0115669	-0.452465	0.2287	-1.68745	0.0328997	0.209334	0.0161406	0.0304871	0.385469	-0.828166	0.0115861	pyrophosphate--fructose 6-phosphate 1-phosphotransferase subunit alpha 2; K00895 pyrophosphate--fructose-6-phosphate 1-phosphotransferase [EC:2.7.1.90] (A)	Pyrophosphate--fructose 6-phosphate 1-phosphotransferase subunit alpha 2 OS=Arabidopsis thaliana GN=PFP-ALPHA2 PE=2 SV=1	Phosphofructokinase
BnaC06T0023400WE	Brara_Chiifu_V3.0_A02_22502031_26348249_Rcr8	0.362797	0.0270664	-0.168675	0.0126388	-1.3656	0.000289873	0.1853	0.216951	-0.282868	0.102484	-0.618336	0.00452057	phosphomethylethanolamine N-methyltransferase; K05929 phosphoethanolamine N-methyltransferase [EC:2.1.1.103] (A)	Phosphomethylethanolamine N-methyltransferase OS=Arabidopsis thaliana GN=NMT2 PE=2 SV=2	Methyltransferase domain
BnaA04T0253000WE	Brara_Chiifu_V3.0_A02_22502031_26348249_Rcr8	-0.246918	0.0912018	-1.1163	0.00351106	-1.25923	0.014068	-1.53474	0.102761	-0.0147272	0.296487	-1.34876	0.00727214	--	Protein EARLY RESPONSIVE TO DEHYDRATION 15 OS=Arabidopsis thaliana GN=ERD15 PE=1 SV=1	Ataxin-2 C-terminal region
BnaC07T0395000WE	Brara_Chiifu_V3.0_A03_23823130_26806601_Rcr4	-0.0955576	0.321895	-0.628143	0.0495286	-1.24897	0.0038997	-0.197701	0.136307	-0.125333	0.267987	0.723099	0.0482746	cystine lyase CORI3-like; K00815 tyrosine aminotransferase [EC:2.6.1.5] (A)	Cystine lyase CORI3 OS=Arabidopsis thaliana GN=CORI3 PE=1 SV=1	Aminotransferase class I and II
BnaA07T0303600WE	Brara_Chiifu_V3.0_A02_22502031_26348249_Rcr8	0.223598	0.37635	-0.709401	0.0161878	-1.24105	0.00527482	-0.357173	0.105812	-0.901816	0.0218618	-0.90061	0.00171254	hypothetical protein; K17803 methyltransferase OMS1, mitochondrial [EC:2.1.1.-] (A)	Methyltransferase-like protein 7A OS=Homo sapiens GN=METTL7A PE=1 SV=1	Methyltransferase domain
BnaA07T0175100WE	Brara_Chiifu_V3.0_A02_22502031_26348249_Rcr8	-0.132465	0.0160547	-0.702033	0.0315221	-1.07175	0.0107668	-0.484947	0.139133	-0.251825	0.153245	-0.596347	0.00526518	fructose-bisphosphate aldolase, cytoplasmic isozyme; K01623 fructose-bisphosphate aldolase, class I [EC:4.1.2.13] (A)	Fructose-bisphosphate aldolase, cytoplasmic isozyme OS=Cicer arietinum GN=ALDC PE=2 SV=1	Fructose-bisphosphate aldolase class-I
Bnascaffold2817T0000100WE	Brara_Chiifu_V3.0_A02_22502031_26348249_Rcr8	-0.248898	0.0115739	-0.557904	0.140757	-0.92266	0.030408	1.04815	0.000613597	-0.0557	0.310256	-0.588701	0.043601	ATPase 2, plasma membrane-type-like; K01535 H+-transporting ATPase [EC:3.6.3.6] (A)	Copia protein OS=Drosophila melanogaster GN=GIP PE=1 SV=3	GAG-pre-integrase domain
BnaA06T0372400WE	Brara_Chiifu_V3.0_A02_22502031_26348249_Rcr8	0.101179	0.359277	0.530904	0.07699	0.616517	0.0215645	0.100143	0.388089	0.25856	0.0929391	0.837072	0.00430514	nucleosome-remodeling factor subunit NURF301; K11728 nucleosome-remodeling factor subunit BPTF (A)	PHD finger protein ALFIN-LIKE 4 OS=Arabidopsis thaliana GN=AL4 PE=1 SV=2	PHD-finger
BnaA05T0410200WE	Brara_Chiifu_V3.0_A02_22502031_26348249_Rcr8	-0.311079	0.244791	0.527564	0.0259557	0.716036	0.0264597	-0.417367	0.0469554	0.217364	0.234053	0.836103	0.00136821	hypothetical protein; K19891 glucan endo-1,3-beta-glucosidase 1/2/3 [EC:3.2.1.39] (A)	Probable glucan endo-1,3-beta-glucosidase A6 OS=Arabidopsis thaliana GN=A6 PE=2 SV=1	X8 domain
BnaA01T0060600WE	Brara_Chiifu_V3.0_A03_23823130_26806601_Rcr4	-0.563006	0.0163097	0.524142	0.00770904	0.800815	0.0088585	-0.445118	0.128569	0.756537	0.00594147	0.62427	0.0174408	CSTF3; cleavage stimulation factor, 3' pre-RNA, subunit 3; K14408 cleavage stimulation factor subunit 3 (A)	Squamous cell carcinoma antigen recognized by T-cells 3 OS=Homo sapiens GN=SART3 PE=1 SV=1	Lsm interaction motif
BnaA01T0055000WE	Brara_Chiifu_V3.0_A03_23823130_26806601_Rcr4	-0.29949	0.124112	0.57209	0.00157403	0.859514	0.00386222	0.554657	0.0445934	-0.134949	0.135079	1.10457	0.0194393	hypothetical protein; K19027 zinc finger FYVE domain-containing protein 26 (A)	Dirigent protein 6 OS=Arabidopsis thaliana GN=DIR6 PE=1 SV=1	Dirigent-like protein
BnaA06T0339200WE	Brara_Chiifu_V3.0_A08_11344437_12169364_CRs	-0.0285478	0.255686	0.559935	0.0385002	0.871292	0.00345405	0.226173	0.296549	0.193876	0.180798	1.17725	0.00983967	receptor protein kinase CLAVATA1; K00924 [EC:2.7.1.-] (A)	Leucine-rich repeat receptor-like serine/threonine-protein kinase BAM1 OS=Arabidopsis thaliana GN=BAM1 PE=1 SV=1	Leucine rich repeat N-terminal domain
BnaA06T0092300WE	Brara_Chiifu_V3.0_A02_22502031_26348249_Rcr8	0.0630892	0.165251	0.704892	0.0336835	0.935365	0.0108314	0.207083	0.364788	0.533065	0.00579687	0.953579	0.0135275	protein gar2; K14411 RNA-binding protein Musashi (A)	Protein IQ-DOMAIN 31 OS=Arabidopsis thaliana GN=IQD31 PE=1 SV=1	IQ calmodulin-binding motif
BnaA02T0308600WE	Brara_Chiifu_V3.0_A02_22502031_26348249_Rcr8	-0.0600763	0.261992	0.771171	0.00461274	1.06449	0.0103659	-0.250595	0.366538	0.275828	0.157547	0.595831	0.0392454	sister chromatid cohesion protein PDS5 homolog A-like; K11267 sister chromatid cohesion protein PDS5 (A)	Protein C2-DOMAIN ABA-RELATED 11 OS=Arabidopsis thaliana GN=CAR11 PE=2 SV=1	C2 domain
BnaC02T0411900WE	Brara_Chiifu_V3.0_A02_22502031_26348249_Rcr8	0.3421	0.285982	0.0315049	0.201248	1.08062	0.013779	-0.442463	0.0310956	0.592193	0.0942265	0.629844	0.0439535	glucan endo-1,3-beta-glucosidase 3-like; K19891 glucan endo-1,3-beta-glucosidase 1/2/3 [EC:3.2.1.39] (A)	Glucan endo-1,3-beta-glucosidase 3 OS=Arabidopsis thaliana GN=At2g01630 PE=1 SV=2	X8 domain
BnaA04T0164300WE	Brara_Chiifu_V3.0_A03_23823130_26806601_Rcr4	0.360941	0.0537028	0.584	0.0186903	1.10496	0.0131963	-0.390707	0.0121211	-0.18038	0.0183404	0.84873	0.0270905	probable inactive receptor kinase At2g26730; K04730 interleukin-1 receptor-associated kinase 1 [EC:2.7.11.1] (A)	Probable inactive receptor kinase At2g26730 OS=Arabidopsis thaliana GN=At2g26730 PE=1 SV=1	Leucine rich repeat N-terminal domain
BnaA03T0480700WE	Brara_Chiifu_V3.0_A03_23823130_26806601_Rcr4	-0.275048	0.0885804	0.512466	0.00147285	1.33663	0.0122418	-0.0467799	0.298382	-0.0748404	0.251678	0.59934	0.0256388	hypothetical protein; K19027 zinc finger FYVE domain-containing protein 26 (A)	Dirigent protein 6 OS=Arabidopsis thaliana GN=DIR6 PE=1 SV=1	Dirigent-like protein
BnaA03T0189000WE	Brara_Chiifu_V3.0_A02_22502031_26348249_Rcr8	0.0840836	0.106824	-0.415517	0.108543	1.47623	0.0196765	0.110942	0.193912	-0.139313	0.384176	1.08135	0.0185744	ankyrin repeat domain-containing protein 30A; K19748 RAB6-interacting golgin (A)	ankyrin repeat domain-containing protein 30A; K19748 RAB6-interacting golgin (A)	Transcriptional activator
BnaC01T0104600WE	Brara_Chiifu_V3.0_A03_24574673_25715499_Rcr1	-0.0278057	0.3595	-0.396274	0.123048	1.98639	0.0230875	0.0921421	0.285524	-0.0506237	0.37004	1.04497	0.0470453	--	Plasma membrane-associated cation-binding protein 1 OS=Arabidopsis thaliana GN=PCAP1 PE=1 SV=1	DREPP plasma membrane polypeptide
BnaA08T0054800WE	Brara_Chiifu_V3.0_A02_22502031_26348249_Rcr8	-0.0168157	0.0907282	1.3998	0.0024372	2.23025	0.000704068	0.544461	0.289745	-0.133778	0.291556	0.858643	0.0207145	uncharacterized LOC104585983; K03189 urease accessory protein (A)	Cytochrome b561 and DOMON domain-containing protein At4g12980 OS=Arabidopsis thaliana GN=At4g12980 PE=2 SV=1	Eukaryotic cytochrome b561
BnaC04T0521000WE	Brara_Chiifu_V3.0_A03_24574673_25715499_Rcr1	-0.492321	0.0458025	0.914355	0.00726474	2.27158	0.0316992	-0.795472	0.000444546	-0.537085	0.0454633	1.14346	0.022487	cysteine desulfurase, mitochondrial precursor; K04487 cysteine desulfurase [EC:2.8.1.7] (A)	Tetrahydrocannabinolic acid synthase OS=Cannabis sativa PE=1 SV=1	Berberine and berberine like
BnaA08T0254300WE	Brara_Chiifu_V3.0_A08_20254038_21748038_qBrCR38-2	0.00415859	0.366002	0.611822	0.0452477	3.65037	0.0041083	-1.02666	0.0394099	-0.00197946	0.272356	0.945442	0.0449064	high affinity nitrate transporter 2.5; K02575 MFS transporter, NNP family, nitrate/nitrite transporter (A)	High affinity nitrate transporter 2.5 OS=Arabidopsis thaliana GN=NRT2.5 PE=2 SV=1	Major Facilitator Superfamily
