# Supplementary material for: Proteome- and metabolome-level changes during early stages of clubroot infection in Brassica napus canola
Source: Royal Society of Chemistry journal article supplement (doi:10.1039/d3mo00210a), 2024-01-22
Supplement: d3mo00210a9.xlsx [file d3mo00210a9.xlsx]

## Sheet: (A) RLP
Table S8 A. Differentially abundant proteins related to receptor like proteins (RLPs). Res = clubroot resistant genotype, Sus = clubroot susceptible genotype,T = pathogen inoculated, C= uninoculated. the numbers 1, 4, and 7 indicate days post pathogen inoculation.
Proteins	Log2 fold change Res1T.C	Qvalue Res1T.C	Log2 fold change Res4T.C	Qvalue Res4T.C	Log2 fold change Res7T.C	Qvalue Res7T.C	Log2 fold change Sus1T.C	Qvalue Sus1T.C	Log2 fold change Sus4T.C	Qvalue Sus4T.C	Log2 fold change Sus7T.C	Qvalue Sus7T.C	KEGG	Swissprot	Pfam
BnaA10T0292900WE	-0.270681	0.0423884	-0.862022	0.00391338	-0.561102	0.00104812	0.457942	0.0118397	-0.131521	0.137809	-0.218743	0.0458943	wall-associated receptor kinase-like 20; K04733 interleukin-1 receptor-associated kinase 4 [EC:2.7.11.1] (A)	Wall-associated receptor kinase-like 20 OS=Arabidopsis thaliana GN=WAKL20 PE=2 SV=1	Wall-associated receptor kinase galacturonan-binding
BnaA10T0072300WE	-0.370778	0.0342217	0.120893	0.041429	1.14086	0.00164551	-0.0654529	0.375724	0.04294	0.368117	0.696461	0.0524635	POPTRDRAFT_756677; hypothetical protein; K04730 interleukin-1 receptor-associated kinase 1 [EC:2.7.11.1] (A)	Probable leucine-rich repeat receptor-like protein kinase At5g49770 OS=Arabidopsis thaliana GN=At5g49770 PE=2 SV=1	Leucine rich repeat N-terminal domain
BnaA10T0272400WE	0.0597509	0.376126	0.285652	0.0803946	1.32699	0.00167569	-0.0880238	0.226545	-0.040096	0.364941	0.880999	0.164659	putative inactive receptor-like protein kinase At1g64210; K04733 interleukin-1 receptor-associated kinase 4 [EC:2.7.11.1] (A)	Probable leucine-rich repeat receptor-like protein kinase At5g05160 OS=Arabidopsis thaliana GN=At5g05160 PE=2 SV=1	Leucine rich repeat N-terminal domain
BnaA06T0339200WE	-0.0285478	0.255686	0.559935	0.0385002	0.871292	0.00345405	0.226173	0.296549	0.193876	0.180798	1.17725	0.00983967	receptor protein kinase CLAVATA1; K00924 [EC:2.7.1.-] (A)	Leucine-rich repeat receptor-like serine/threonine-protein kinase BAM1 OS=Arabidopsis thaliana GN=BAM1 PE=1 SV=1	Leucine rich repeat N-terminal domain
BnaC03T0525300WE	0.0263475	0.124897	0.201868	0.279407	0.836165	0.00613628	-0.338262	0.0321059	0.0415407	0.377749	0.201549	0.112286	receptor-like protein kinase HERK 1; K04730 interleukin-1 receptor-associated kinase 1 [EC:2.7.11.1] (A)	Receptor-like protein kinase HERK 1 OS=Arabidopsis thaliana GN=HERK1 PE=1 SV=1	Protein tyrosine kinase
BnaC06T0212100WE	-0.338982	0.0127918	-0.29394	0.0169321	1.1207	0.00677335	0.289269	0.0906967	-0.139326	0.374958	0.573403	0.0924026	receptor-like protein kinase FERONIA; K04730 interleukin-1 receptor-associated kinase 1 [EC:2.7.11.1] (A)	Receptor-like protein kinase FERONIA OS=Arabidopsis thaliana GN=FER PE=1 SV=1	Protein tyrosine kinase
BnaA06T0352800WE	-0.354453	0.039955	0.627022	0.00417898	1.337	0.00865664	-0.243347	0.20041	0.0630709	0.355319	0.641792	0.0537106	LRR receptor-like serine/threonine-protein kinase EFR; K13420 LRR receptor-like serine/threonine-protein kinase FLS2 [EC:2.7.11.1] (A)	Leucine-rich repeat receptor-like protein kinase PXC2 OS=Arabidopsis thaliana GN=PXC2 PE=2 SV=1	Leucine rich repeat N-terminal domain
BnaC09T0298700WE	-0.140095	0.33957	-0.0400381	0.242522	0.977734	0.0118268	-1.89863	0.0645273	-0.0189996	0.00500895	0.826035	0.000449442	POPTRDRAFT_756677; hypothetical protein; K04730 interleukin-1 receptor-associated kinase 1 [EC:2.7.11.1] (A)	Probable leucine-rich repeat receptor-like protein kinase At5g49770 OS=Arabidopsis thaliana GN=At5g49770 PE=2 SV=1	Leucine rich repeat N-terminal domain
BnaC01T0289400WE	0.742561	0.0582586	-0.122451	0.152034	0.612539	0.0125756	0.953405	0.268244	0.162356	0.12353	-0.243803	0.304083	probable receptor protein kinase TMK1; K17285 selenium-binding protein 1 (A)	Receptor-like kinase TMK4 OS=Arabidopsis thaliana GN=TMK4 PE=1 SV=1	Leucine Rich repeat
BnaA04T0164300WE	0.360941	0.0537028	0.584	0.0186903	1.10496	0.0131963	-0.390707	0.0121211	-0.18038	0.0183404	0.84873	0.0270905	probable inactive receptor kinase At2g26730; K04730 interleukin-1 receptor-associated kinase 1 [EC:2.7.11.1] (A)	Probable inactive receptor kinase At2g26730 OS=Arabidopsis thaliana GN=At2g26730 PE=1 SV=1	Leucine rich repeat N-terminal domain
BnaA10T0050600WE	-0.185433	0.363233	0.418446	0.0111426	1.30761	0.0140479	0.362946	0.0792492	0.131458	0.28203	0.833485	0.0433742	hypothetical protein; K04730 interleukin-1 receptor-associated kinase 1 [EC:2.7.11.1] (A)	Probable LRR receptor-like serine/threonine-protein kinase At1g06840 OS=Arabidopsis thaliana GN=At1g06840 PE=2 SV=2	Leucine rich repeat N-terminal domain
BnaC07T0366800WE	-0.534091	0.024162	0.486803	0.0035971	1.32588	0.0143341	-0.186334	0.383793	-0.101946	0.299635	0.599191	0.066778	LRR receptor-like serine/threonine-protein kinase FLS2; K13420 LRR receptor-like serine/threonine-protein kinase FLS2 [EC:2.7.11.1] (A)	Receptor-like protein 12 OS=Arabidopsis thaliana GN=RLP12 PE=2 SV=2	Leucine rich repeat N-terminal domain
BnaA01T0280300WE	-3.07324	0.12801	-0.506776	0.154981	1.51095	0.0492888	-0.476676	0.12124	-1.14728	0.00448426	0.0426222	0.159452	LRR receptor-like serine/threonine-protein kinase FLS2; K13420 LRR receptor-like serine/threonine-protein kinase FLS2 [EC:2.7.11.1] (A)	DNA-damage-repair/toleration protein DRT100 OS=Arabidopsis thaliana GN=DRT100 PE=2 SV=2	Leucine rich repeat N-terminal domain
BnaA03T0181900WE	-0.661097	0.137312	-0.346028	0.358491	0.987512	0.0537032	-0.384138	0.307878	-1.42451	0.0164643	0.582247	0.0120503	Eix1; EIX receptor 1; K13466 EIX receptor 1/2 (A)	LRR receptor-like serine/threonine-protein kinase GSO1 OS=Arabidopsis thaliana GN=GSO1 PE=2 SV=1	Leucine rich repeat N-terminal domain
BnaC02T0238000WE	0.108065	0.218502	0.0691506	0.331784	0.761004	0.0602945	0.718173	0.0130216	0.289213	0.0598908	0.441269	0.0695255	probable LRR receptor-like serine/threonine-protein kinase At1g56140; K04733 interleukin-1 receptor-associated kinase 4 [EC:2.7.11.1] (A)	Probable LRR receptor-like serine/threonine-protein kinase At1g56130 OS=Arabidopsis thaliana GN=At1g56130 PE=2 SV=2	Protein tyrosine kinase
BnaA02T0046000WE	-1.491	0.164754	0.198125	0.232222	1.50958	0.0828119	-0.528335	0.00760828	-0.897867	0.0136742	0.18074	0.139038	Leucine-rich receptor-like protein kinase family protein; K13420 LRR receptor-like serine/threonine-protein kinase FLS2 [EC:2.7.11.1] (A)	DNA-damage-repair/toleration protein DRT100 OS=Arabidopsis thaliana GN=DRT100 PE=2 SV=2	Leucine rich repeat N-terminal domain
BnaA05T0331800WE	-0.00434548	0.18808	0.577365	0.0336318	0.316013	0.197818	-0.144242	0.186105	1.28006	0.0493648	0.941006	0.0142102	probably inactive receptor-like protein kinase At5g41680; K04730 interleukin-1 receptor-associated kinase 1 [EC:2.7.11.1] (A)	Probable inactive receptor kinase RLK902 OS=Arabidopsis thaliana GN=RLK902 PE=1 SV=1	Leucine rich repeat N-terminal domain
BnaA05T0158900WE	-0.875454	0.0354283	-0.2066	0.226046	0.00602458	0.200682	-0.0904143	0.225827	0.478379	0.109905	0.249925	0.3199	probable LRR receptor-like serine/threonine-protein kinase At1g53440; K04733 interleukin-1 receptor-associated kinase 4 [EC:2.7.11.1] (A)	Probable LRR receptor-like serine/threonine-protein kinase At1g53430 OS=Arabidopsis thaliana GN=At1g53430 PE=1 SV=1	Leucine Rich Repeat
BnaC05T0204500WE	0.581351	0.117835	0.48975	0.357069	1.11113	0.325143	-1.37095	0.148635	0.209104	0.194516	0.842295	0.039986	probable inactive receptor kinase At1g27190; K04730 interleukin-1 receptor-associated kinase 1 [EC:2.7.11.1] (A)	Probable inactive receptor kinase At1g27190 OS=Arabidopsis thaliana GN=At1g27190 PE=1 SV=1	Leucine rich repeat N-terminal domain

## Sheet: (B) MAPK
Table S8 B. Differentially abundant proteins related to mitogen activated protein kinases (MAPK). Res = clubroot resistant genotype, Sus = clubroot susceptible genotype,T = pathogen inoculated, C= uninoculated. the numbers 1, 4, and 7 indicate days post pathogen inoculation.
Proteins	Log2 fold change Res1T.C	Qvalue Res1T.C	Log2 fold change Res4T.C	Qvalue Res4T.C	Log2 fold change Res7T.C	Qvalue Res7T.C	Log2 fold change Sus1T.C	Qvalue Sus1T.C	Log2 fold change Sus4T.C	Qvalue Sus4T.C	Log2 fold change Sus7T.C	Qvalue Sus7T.C	KEGG	Swissprot	Pfam
BnaA01T0019300WE	0.00592367	0.189908	-0.227041	0.0987976	0.147021	0.0395942	-0.527335	0.136072	0.102464	0.38088	-0.579166	0.00779535	probable serine/threonine-protein kinase DDB_G0271682; K06272 integrin-linked kinase [EC:2.7.11.1] (A)	Putative serine/threonine-protein kinase/receptor R831 OS=Acanthamoeba polyphaga mimivirus GN=MIMI_R831 PE=3 SV=2	Ankyrin repeats (3 copies)
BnaA03T0182000WE	0.68972	0.213869	0.331315	0.0569226	0.228239	0.00819921	0.103094	0.298041	1.25287	0.0235758	-0.0770249	0.303039	serine/threonine protein kinase, putative (EC:2.7.10.2); K04422 mitogen-activated protein kinase kinase kinase 13 [EC:2.7.11.25] (A)	Serine/threonine-protein kinase CTR1 OS=Arabidopsis thaliana GN=CTR1 PE=1 SV=1	PB1 domain
BnaA03T0226400WE	0.731049	0.00727213	-0.570788	0.0584856	-0.446999	0.0289223	-0.252362	0.197779	0.280552	0.157767	0.207044	0.168138	mitogen-activated protein kinase 6-like; K14512 mitogen-activated protein kinase 6 [EC:2.7.11.24] (A)	Mitogen-activated protein kinase 6 OS=Arabidopsis thaliana GN=MPK6 PE=1 SV=1	Protein kinase domain
BnaA06T0180500WE	0.436438	0.0237514	0.0868926	0.147044	-0.53835	0.028554	-1.01441	0.1617	0.11167	0.306611	-0.059576	0.248564	MPK3.1; mitogen-activated protein kinase 3; K04371 mitogen-activated protein kinase 1/3 [EC:2.7.11.24] (A)	Mitogen-activated protein kinase 3 OS=Arabidopsis thaliana GN=MPK3 PE=1 SV=2	Protein kinase domain
BnaA07T0092800WE	-0.332753	0.0253467	-0.528387	0.00975626	1.04456	0.0948499	0.3369	0.36902	0.155972	0.175046	0.188789	0.241946	hypothetical protein; K04426 mitogen-activated protein kinase kinase kinase 5 [EC:2.7.11.25] (A)	Non-classical arabinogalactan protein 30 OS=Arabidopsis thaliana GN=AGP30 PE=2 SV=1	Pollen proteins Ole e I like
BnaA08T0020400WE	0.952197	0.0179967	-0.0636646	0.336423	-0.136627	0.181808	-0.0376132	0.263453	0.275499	0.0185216	0.203013	0.024903	mitogen-activated protein kinase kinase 4-like; K13413 mitogen-activated protein kinase kinase 4/5, plant [EC:2.7.12.2] (A)	Mitogen-activated protein kinase kinase 4 OS=Arabidopsis thaliana GN=MKK4 PE=1 SV=1	Protein kinase domain
BnaA09T0395500WE	-0.554513	0.0674955	0.169768	0.295997	1.33327	0.109179	-0.459594	0.312061	-0.535425	0.0336872	0.435069	0.115576	hypothetical protein; K04426 mitogen-activated protein kinase kinase kinase 5 [EC:2.7.11.25] (A)	Non-classical arabinogalactan protein 31 OS=Arabidopsis thaliana GN=AGP31 PE=1 SV=1	Pollen proteins Ole e I like
BnaC03T0230200WE	-0.768624	0.105886	-0.621576	0.00761929	-0.0888836	0.313665	1.39827	0.0421752	-0.341775	0.16217	-0.369813	0.0202453	LRR receptor-like serine/threonine-protein kinase FLS2; K13420 LRR receptor-like serine/threonine-protein kinase FLS2 [EC:2.7.11.1] (A)	Probable LRR receptor-like serine/threonine-protein kinase At4g08850 OS=Arabidopsis thaliana GN=At4g08850 PE=2 SV=3	Leucine rich repeat N-terminal domain
BnaC07T0129200WE	-0.24047	0.1449	0.139993	0.276335	0.655331	0.0877371	0.079974	0.0236589	-0.254733	0.067046	0.390339	0.0673193	hypothetical protein; K04426 mitogen-activated protein kinase kinase kinase 5 [EC:2.7.11.25] (A)	Non-classical arabinogalactan protein 30 OS=Arabidopsis thaliana GN=AGP30 PE=2 SV=1	Pollen proteins Ole e I like
BnaC07T0411900WE	-1.15422	0.0210653	0.0522104	0.128914	-0.961434	0.166756	-0.184668	0.210157	-0.0518926	0.131224	-0.232388	0.120114	mitogen-activated protein kinase kinase 1; K04368 mitogen-activated protein kinase kinase 1 [EC:2.7.12.2] (A)	Mitogen-activated protein kinase kinase 1 OS=Arabidopsis thaliana GN=MKK1 PE=1 SV=2	Protein kinase domain
BnaC08T0419100WE	-0.500923	0.213454	0.178143	0.259785	-0.0316773	0.341338	0.0791046	0.229516	0.622948	0.0336208	0.136558	0.25336	mitogen-activated protein kinase 8-like; K04371 mitogen-activated protein kinase 1/3 [EC:2.7.11.24] (A)	Mitogen-activated protein kinase 8 OS=Arabidopsis thaliana GN=MPK8 PE=1 SV=2	Protein kinase domain

## Sheet: (C) Calcium 
Table S8 C. Differentially abundant proteins related to calcium. Res = clubroot resistant genotype, Sus = clubroot susceptible genotype,T = pathogen inoculated, C= uninoculated. the numbers 1, 4, and 7 indicate days post pathogen inoculation.
Proteins	Log2 fold change Res1T.C	Qvalue Res1T.C	Log2 fold change Res4T.C	Qvalue Res4T.C	Log2 fold change Res7T.C	Qvalue Res7T.C	Log2 fold change Sus1T.C	Qvalue Sus1T.C	Log2 fold change Sus4T.C	Qvalue Sus4T.C	Log2 fold change Sus7T.C	Qvalue Sus7T.C	KEGG	Swissprot	Pfam
BnaA03T0262200WE	-0.103523	0.266496	-0.617895	0.0134824	-1.10541	0.00514019	-0.036862	0.279958	-0.185577	0.07579	-0.157176	0.238685	CPK4.2; calcium-dependent protein kinase 4 (EC:2.7.11.1); K13412 calcium-dependent protein kinase [EC:2.7.11.1] (A)	Calcium-dependent protein kinase 4 OS=Arabidopsis thaliana GN=CPK4 PE=1 SV=1	EF-hand domain pair
BnaA09T0170100WE	0.125411	0.160221	-0.607182	0.0311196	-0.857302	0.0118069	-0.096459	0.22878	0.0248289	0.264169	0.203691	0.143957	calreticulin-1-like; K08057 calreticulin (A)	Calreticulin-1 OS=Arabidopsis thaliana GN=CRT1 PE=1 SV=1	Calreticulin family
BnaA06T0265000WE	-0.0644944	0.0525093	-0.440773	0.0036702	-0.662769	0.00256256	0.0972635	0.381597	-0.0332821	0.259956	-0.0865972	0.0528523	calnexin homolog 1; K08054 calnexin (A)	Calnexin homolog 1 OS=Arabidopsis thaliana GN=CNX1 PE=1 SV=1	Calreticulin family
BnaC03T0487100WE	-0.0735895	0.269214	-0.556985	0.0352328	-0.625879	0.023567	-0.472907	0.0683877	-0.10233	0.0387624	0.0228664	0.0966915	calnexin homolog 1-like; K08054 calnexin (A)	Calnexin homolog 1 OS=Arabidopsis thaliana GN=CNX1 PE=1 SV=1	Calreticulin family
BnaC08T0141800WE	0.0463833	0.173937	-0.823367	0.0215291	-0.554097	0.0123329	0.122793	0.0888566	0.0838859	0.173396	0.0575033	0.260329	calreticulin-2-like; K08057 calreticulin (A)	Calreticulin-2 OS=Arabidopsis thaliana GN=CRT2 PE=1 SV=3	Calreticulin family
BnaA01T0175700WE	0.114184	0.113899	-0.3796	0.0424481	-0.542137	0.014935	-0.153411	0.144673	0.0315049	0.230186	0.241983	0.0272248	calreticulin-1; K08057 calreticulin (A)	Calreticulin-1 OS=Arabidopsis thaliana GN=CRT1 PE=1 SV=1	Calreticulin family
BnaA02T0252900WE	-0.0988821	0.166593	0.208912	0.241984	-0.0500879	0.152282	0.150657	0.122061	0.22297	0.0426317	0.362626	0.00530186	calcium-dependent protein kinase 21; K13412 calcium-dependent protein kinase [EC:2.7.11.1] (A)	Calcium-dependent protein kinase 21 OS=Arabidopsis thaliana GN=CPK21 PE=1 SV=1	EF-hand domain pair
BnaA07T0192900WE	0.132956	0.382862	0.11169	0.235967	0.275351	0.273123	0.39303	0.14199	0.0213383	0.254236	0.49284	0.0336057	calcium-dependent protein kinase 32-like; K13412 calcium-dependent protein kinase [EC:2.7.11.1] (A)	Calcium-dependent protein kinase 32 OS=Arabidopsis thaliana GN=CPK32 PE=1 SV=1	EF-hand domain pair
BnaA08T0278600WE	-0.0706122	0.0561044	0.373812	0.00801987	0.348498	0.0158872	0.128486	0.349309	0.100085	0.345512	-0.0577877	0.221461	calreticulin-3; K08057 calreticulin (A)	Calreticulin-3 OS=Arabidopsis thaliana GN=CRT3 PE=1 SV=2	Calreticulin family
BnaC01T0013800WE	0.124961	0.138546	-0.0293142	0.344769	0.510893	0.00398107	-0.277275	0.0641679	-0.016271	0.26401	0.313639	0.0522026	CPK5-2.1, CPK5.1; calcium-dependent protein kinase 5 (EC:2.7.11.1); K13412 calcium-dependent protein kinase [EC:2.7.11.1] (A)	Calcium-dependent protein kinase 5 OS=Arabidopsis thaliana GN=CPK5 PE=2 SV=1	EF-hand domain pair
BnaA06T0328400WE	-0.0243153	0.134282	0.459343	0.163502	0.538373	0.00221629	-0.755643	0.137622	-0.649493	0.00923145	-0.0907072	0.160757	calcium-dependent protein kinase 3-like; K13412 calcium-dependent protein kinase [EC:2.7.11.1] (A)	Calcium-dependent protein kinase 3 OS=Arabidopsis thaliana GN=CPK3 PE=1 SV=1	EF-hand domain pair
BnaA10T0130500WE	-0.114548	0.19833	0.375241	0.176775	0.550494	0.0398472	-0.319687	0.0943127	0.0836486	0.128747	0.241098	0.164222	--	Calmodulin-binding protein 60 B OS=Arabidopsis thaliana GN=CBP60B PE=2 SV=1	Calmodulin binding protein-like
BnaA01T0080500WE	0.262068	0.0653541	-0.380765	0.0912429	0.838292	0.00412726	-0.551373	0.284092	0.00700848	0.335334	0.21938	0.0473241	calcineurin B-like protein 3; K06268 serine/threonine-protein phosphatase 2B regulatory subunit (A)	Calcineurin B-like protein 3 OS=Arabidopsis thaliana GN=CBL3 PE=1 SV=2	EF-hand domain pair
BnaA06T0092300WE	0.0630892	0.165251	0.704892	0.0336835	0.935365	0.0108314	0.207083	0.364788	0.533065	0.00579687	0.953579	0.0135275	protein gar2; K14411 RNA-binding protein Musashi (A)	Protein IQ-DOMAIN 31 OS=Arabidopsis thaliana GN=IQD31 PE=1 SV=1	IQ calmodulin-binding motif
BnaA09T0010400WE	0.0387665	0.374506	0.320407	0.0273908	0.956662	0.00648031	-0.249642	0.111822	0.400249	0.2472	0.456191	0.0193652	calcium-transporting ATPase 2, endoplasmic reticulum-type; K01537 Ca2+-transporting ATPase [EC:3.6.3.8] (A)	Calcium-transporting ATPase 2, endoplasmic reticulum-type OS=Arabidopsis thaliana GN=ECA2 PE=1 SV=1	Cation transporter/ATPase, N-terminus
BnaA02T0120800WE	0.060246	0.266049	0.25816	0.0190527	0.962811	0.0109891	-0.827967	0.155927	0.0274366	0.196108	0.112216	0.327083	calcium-transporting ATPase 8, plasma membrane-type; K01537 Ca2+-transporting ATPase [EC:3.6.3.8] (A)	Calcium-transporting ATPase 8, plasma membrane-type OS=Arabidopsis thaliana GN=ACA8 PE=1 SV=1	Cation transporter/ATPase, N-terminus
BnaA02T0323000WE	-0.62058	0.0767716	0.509675	0.00631873	0.976633	0.00626495	0.288633	0.187218	0.0397649	0.176236	-0.133252	0.318205	protein gar2; K14411 RNA-binding protein Musashi (A)	Protein IQ-DOMAIN 31 OS=Arabidopsis thaliana GN=IQD31 PE=1 SV=1	IQ calmodulin-binding motif
BnaA05T0338300WE	0.00429873	0.146697	0.352646	0.103146	0.992562	0.0182525	-0.112838	0.191777	0.0613902	0.320862	-0.0893226	0.197894	Triacylglycerol lipase SDP1; K14674 TAG lipase / steryl ester hydrolase / phospholipase A2 / LPA acyltransferase [EC:3.1.1.3 3.1.1.13 3.1.1.4 2.3.1.51] (A)	Calmodulin-binding transcription activator 6 OS=Arabidopsis thaliana GN=CMTA6 PE=2 SV=1	IPT/TIG domain
BnaC07T0435500WE	0.363233	0.155584	0.21916	0.140289	1.24873	0.00319737	-0.170489	0.166765	-0.0266723	0.0873565	0.123694	0.0117773	calcium-transporting ATPase 10, plasma membrane-type-like; K01537 Ca2+-transporting ATPase [EC:3.6.3.8] (A)	Calcium-transporting ATPase 10, plasma membrane-type OS=Arabidopsis thaliana GN=ACA10 PE=1 SV=2	Cation transporter/ATPase, N-terminus
BnaA09T0109100WE	0.460778	0.160759	0.315475	0.0119735	1.27564	0.00757001	-0.152479	0.385799	0.59264	0.0538398	0.213074	0.125279	--	Calmodulin-binding protein 60 C OS=Arabidopsis thaliana GN=CBP60C PE=2 SV=1	Calmodulin binding protein-like
BnaA10T0126300WE	-0.221552	0.136058	0.326052	0.00456395	1.54588	0.0102883	-0.102333	0.304871	-0.327633	0.0513258	0.273805	0.0880738	calcium-transporting ATPase 8, plasma membrane-type-like; K01537 Ca2+-transporting ATPase [EC:3.6.3.8] (A)	Calcium-transporting ATPase 8, plasma membrane-type OS=Arabidopsis thaliana GN=ACA8 PE=1 SV=1	Cation transporter/ATPase, N-terminus

## Sheet: (D) ROS
Table S8 D. Differentially abundant proteins related to reactive oxygen species (ROS). Res = clubroot resistant genotype, Sus = clubroot susceptible genotype,T = pathogen inoculated, C= uninoculated. the numbers 1, 4, and 7 indicate days post pathogen inoculation.
Proteins	Log2 fold change Res1T.C	Qvalue Res1T.C	Log2 fold change Res4T.C	Qvalue Res4T.C	Log2 fold change Res7T.C	Qvalue Res7T.C	Log2 fold change Sus1T.C	Qvalue Sus1T.C	Log2 fold change Sus4T.C	Qvalue Sus4T.C	Log2 fold change Sus7T.C	Qvalue Sus7T.C	KEGG	Swissprot	Pfam
BnaC07T0136500WE	0.187015	0.0146108	-0.418751	0.0866261	-1.54297	0.00305508	-0.383939	0.0169891	-0.439817	0.0588897	-0.637818	0.00491477	glucose-6-phosphate 1-dehydrogenase 3, chloroplastic-like; K00036 glucose-6-phosphate 1-dehydrogenase [EC:1.1.1.49 1.1.1.363] (A)	Glucose-6-phosphate 1-dehydrogenase 3, chloroplastic OS=Arabidopsis thaliana GN=At1g24280 PE=2 SV=2	Glucose-6-phosphate dehydrogenase, NAD binding domain
BnaA09T0094800WE	-0.174645	0.37446	-0.463691	0.113852	-1.13237	0.00613254	-0.0345399	0.359302	-0.696734	0.0642577	-0.828365	0.0411316	glutathione S-transferase F14; K00799 glutathione S-transferase [EC:2.5.1.18] (A)	Glutathione S-transferase F14 OS=Arabidopsis thaliana GN=GSTF14 PE=2 SV=1	Glutathione S-transferase, C-terminal domain
BnaC04T0491600WE	0.364443	0.00887722	-0.486463	0.037819	-1.09974	0.00173914	2.90955	0.0597827	-0.298951	0.13916	-0.09957	0.34713	glutathione S-transferase F9-like; K00799 glutathione S-transferase [EC:2.5.1.18] (A)	Glutathione S-transferase F9 OS=Arabidopsis thaliana GN=GSTF9 PE=1 SV=1	Glutathione S-transferase, N-terminal domain
BnaC07T0147000WE	0.254821	0.0564861	-0.420409	0.0143841	-1.09079	0.00632342	-0.258063	0.0915346	-0.00658868	0.215508	-0.388585	0.0312723	glutathione S-transferase U13-like; K00799 glutathione S-transferase [EC:2.5.1.18] (A)	Glutathione S-transferase U13 OS=Arabidopsis thaliana GN=GSTU13 PE=2 SV=1	Glutathione S-transferase, N-terminal domain
BnaA03T0070300WE	0.137353	0.0677897	-0.11821	0.273488	-1.04939	0.00977937	-0.390875	0.00502396	-0.245313	0.106301	-0.615407	0.0024956	glucose-6-phosphate 1-dehydrogenase 2, chloroplastic-like; K00036 glucose-6-phosphate 1-dehydrogenase [EC:1.1.1.49 1.1.1.363] (A)	Glucose-6-phosphate 1-dehydrogenase 2, chloroplastic OS=Arabidopsis thaliana GN=At5g13110 PE=2 SV=2	Glucose-6-phosphate dehydrogenase, NAD binding domain
BnaC08T0423300WE	0.253521	0.0110062	-0.415912	0.147146	-0.970752	0.0260565	0.25896	0.266131	0.183804	0.225635	-0.583494	0.0409638	glutathione S-transferase U24; K00799 glutathione S-transferase [EC:2.5.1.18] (A)	Glutathione S-transferase U24 OS=Arabidopsis thaliana GN=GSTU24 PE=2 SV=1	Glutathione S-transferase, C-terminal domain
BnaA06T0115800WE	0.261276	0.0133928	-0.388964	0.0329279	-0.955709	0.00208143	-0.0243743	0.30103	-0.0556812	0.117199	-0.236003	0.0374116	glutathione S-transferase U24-like; K00799 glutathione S-transferase [EC:2.5.1.18] (A)	Glutathione S-transferase U24 OS=Arabidopsis thaliana GN=GSTU24 PE=2 SV=1	Glutathione S-transferase, C-terminal domain
BnaC08T0281500WE	0.590554	0.058243	-0.55009	0.0969016	-0.952627	0.0446924	-1.13635	0.0562022	0.203763	0.168454	0.209526	0.0424995	peroxiredoxin-2D; K03386 peroxiredoxin (alkyl hydroperoxide reductase subunit C) [EC:1.11.1.15] (A)	Peroxiredoxin-2E, chloroplastic OS=Arabidopsis thaliana GN=PRXIIE PE=1 SV=2	Redoxin
BnaA04T0086600WE	-0.0926791	0.275759	0.166861	0.363362	-0.935707	0.0149152	-0.0931647	0.216915	0.319921	0.0294741	-0.202634	0.137921	microsomal glutathione S-transferase 3-like; K00799 glutathione S-transferase [EC:2.5.1.18] (A)	Microsomal glutathione S-transferase 3 OS=Mus musculus GN=Mgst3 PE=1 SV=1	MAPEG family
BnaC07T0465300WE	-0.0883898	0.0641224	-0.443205	0.0358117	-0.845463	0.011424	-0.130055	0.273309	0.279524	0.0163838	0.0862438	0.301812	L-ascorbate peroxidase 3, peroxisomal; K00434 L-ascorbate peroxidase [EC:1.11.1.11] (A)	L-ascorbate peroxidase 3, peroxisomal OS=Arabidopsis thaliana GN=APX3 PE=1 SV=1	Peroxidase
BnaA03T0164100WE	0.481375	0.0339546	-0.234933	0.0787891	-0.828362	0.00121471	-1.4534	0.194828	-0.307955	0.0524064	-0.0905232	0.172477	glutathione S-transferase F9; K00799 glutathione S-transferase [EC:2.5.1.18] (A)	Glutathione S-transferase F9 OS=Arabidopsis thaliana GN=GSTF9 PE=1 SV=1	Glutathione S-transferase, N-terminal domain
BnaC05T0072100WE	-0.607471	0.0107124	-0.434933	0.12701	-0.82422	0.00571751	0.361023	0.0534173	0.239394	0.0218657	0.0412848	0.305277	probable elongation factor 1-gamma 1; K03233 elongation factor 1-gamma (A)	Probable elongation factor 1-gamma 1 OS=Arabidopsis thaliana GN=At1g09640 PE=2 SV=1	Glutathione S-transferase, C-terminal domain
BnaC03T0112000WE	0.0449923	0.319187	-0.327945	0.089048	-0.802002	0.0455724	0.0559996	0.360416	0.0710252	0.350461	-0.392407	0.0173207	glutathione S-transferase F10; K00799 glutathione S-transferase [EC:2.5.1.18] (A)	Glutathione S-transferase F10 OS=Arabidopsis thaliana GN=GSTF10 PE=1 SV=3	Glutathione S-transferase, C-terminal domain
BnaA03T0167800WE	0.059059	0.21254	-0.510078	0.0279041	-0.770643	0.0167015	0.544304	0.278098	0.160726	0.256385	0.396821	0.212205	probable glutathione peroxidase 2; K00432 glutathione peroxidase [EC:1.11.1.9] (A)	Probable glutathione peroxidase 2 OS=Arabidopsis thaliana GN=GPX2 PE=1 SV=1	Glutathione peroxidase
BnaA04T0005200WE	-0.132826	0.30062	-0.575213	0.0555313	-0.677366	0.0188444	-0.470844	0.0400024	0.660517	0.00136043	-0.241302	0.327324	glutathione S-transferase F13; K00799 glutathione S-transferase [EC:2.5.1.18] (A)	Glutathione S-transferase F13 OS=Arabidopsis thaliana GN=GSTF13 PE=3 SV=1	Glutathione S-transferase, N-terminal domain
BnaA09T0417200WE	0.306881	0.156989	-0.559302	0.00379208	-0.662143	0.0142686	-0.00770945	0.331242	-0.0626379	0.0970398	-0.0302674	0.345681	glutathione S-transferase U13-like; K00799 glutathione S-transferase [EC:2.5.1.18] (A)	Glutathione S-transferase U13 OS=Arabidopsis thaliana GN=GSTU13 PE=2 SV=1	Glutathione S-transferase, C-terminal domain
BnaA02T0256700WE	-0.119108	0.0776611	-0.496463	0.0443385	-0.582048	0.00179649	0.439226	0.0213481	-0.397354	0.0685686	-0.419109	0.00977792	GST1; glutathione S-transferase; K00799 glutathione S-transferase [EC:2.5.1.18] (A)	Glutathione S-transferase F3 OS=Arabidopsis thaliana GN=GSTF3 PE=2 SV=1	Glutathione S-transferase, C-terminal domain
BnaA04T0188600WE	0.190237	0.0306947	-0.341103	0.0257639	-0.550588	0.00440198	0.180169	0.124797	-0.188308	0.0558082	-0.323148	0.0108339	glutathione S-transferase F9-like; K00799 glutathione S-transferase [EC:2.5.1.18] (A)	Glutathione S-transferase F9 OS=Arabidopsis thaliana GN=GSTF9 PE=1 SV=1	Glutathione S-transferase, N-terminal domain
BnaA04T0180100WE	0.271215	0.0215263	-0.643198	0.00264355	-0.53334	0.00426206	0.441463	0.0257599	0.0995387	0.108594	-0.480368	0.0358648	glutathione S-transferase U7; K00799 glutathione S-transferase [EC:2.5.1.18] (A)	Glutathione S-transferase U7 OS=Arabidopsis thaliana GN=GSTU7 PE=2 SV=1	Glutathione S-transferase, C-terminal domain
BnaA06T0057200WE	-0.208639	0.0126617	-0.243911	0.0193805	-0.517693	0.00727686	-0.143829	0.00186042	-0.147065	0.016151	-0.260956	0.0580841	probable elongation factor 1-gamma 1; K03233 elongation factor 1-gamma (A)	Probable elongation factor 1-gamma 1 OS=Arabidopsis thaliana GN=At1g09640 PE=2 SV=1	Glutathione S-transferase, C-terminal domain
BnaC08T0174400WE	0.0907861	0.323443	-0.511562	0.00496119	-0.513276	0.0216264	0.138211	0.0676228	-0.115521	0.0916248	0.0470206	0.237043	copper chaperone for superoxide dismutase, chloroplastic/cytosolic; K04569 copper chaperone for superoxide dismutase (A)	Copper chaperone for superoxide dismutase, chloroplastic/cytosolic OS=Arabidopsis thaliana GN=CCS PE=1 SV=1	Heavy-metal-associated domain
BnaA01T0067500WE	0.207988	0.167451	-0.490799	0.129911	-0.495086	0.121702	-1.5159	0.12688	1.81262	0.00482548	-0.111479	0.186705	superoxide dismutase [Fe] 1, chloroplastic; K04564 superoxide dismutase, Fe-Mn family [EC:1.15.1.1] (A)	Superoxide dismutase [Fe] 1, chloroplastic OS=Arabidopsis thaliana GN=FSD1 PE=1 SV=4	Iron/manganese superoxide dismutases, alpha-hairpin domain
BnaA08T0240200WE	0.302004	0.0264485	-0.431836	0.02562	-0.471985	0.0877809	-0.193264	0.206082	-0.0254391	0.142426	-0.0517059	0.297432	glutathione S-transferase U26; K00799 glutathione S-transferase [EC:2.5.1.18] (A)	Glutathione S-transferase U26 OS=Arabidopsis thaliana GN=GSTU26 PE=2 SV=1	Glutathione S-transferase, C-terminal domain
BnaC09T0029500WE	0.261197	0.0544557	0.155843	0.0780034	0.580265	0.0223689	-0.660148	0.0477929	0.3146	0.00152442	0.0733617	0.189361	glucose-6-phosphate 1-dehydrogenase, cytoplasmic isoform 1-like; K00036 glucose-6-phosphate 1-dehydrogenase [EC:1.1.1.49 1.1.1.363] (A)	Glucose-6-phosphate 1-dehydrogenase, cytoplasmic isoform 1 OS=Arabidopsis thaliana GN=ACG9 PE=2 SV=1	Glucose-6-phosphate dehydrogenase, NAD binding domain
BnaA03T0240300WE	0.0938238	0.31935	-0.185403	0.120548	0.705936	0.00354054	0.105666	0.211476	-0.123652	0.0534166	0.0118344	0.356361	glutathione S-transferase F8, chloroplastic-like; K00799 glutathione S-transferase [EC:2.5.1.18] (A)	Glutathione S-transferase F8, chloroplastic OS=Arabidopsis thaliana GN=GSTF8 PE=1 SV=3	Glutathione S-transferase, C-terminal domain
BnaA09T0088600WE	-0.53783	0.105751	0.295881	0.0213168	0.959676	0.0207352	-0.00952813	0.257841	-0.282737	0.0299874	0.353562	0.0836953	L-ascorbate oxidase homolog; K19791 iron transport multicopper oxidase (A)	L-ascorbate oxidase homolog OS=Nicotiana tabacum PE=2 SV=1	Multicopper oxidase
BnaC01T0120900WE	-1.01678	0.123894	0.473646	0.100946	1.05237	0.0828055	-0.737011	0.00388613	-0.744869	0.0439033	0.357288	0.0798175	L-ascorbate oxidase homolog; K19791 iron transport multicopper oxidase (A)	L-ascorbate oxidase homolog OS=Brassica napus GN=Bp10 PE=2 SV=1	Multicopper oxidase
BnaA09T0448900WE	0.940148	0.180205	0.605793	0.0200528	1.09748	0.00265669	-1.25895	0.0277578	4.76129	0.262598	0.0428777	0.293848	L-ascorbate oxidase homolog; K19791 iron transport multicopper oxidase (A)	L-ascorbate oxidase homolog OS=Nicotiana tabacum PE=2 SV=1	Multicopper oxidase
BnaC03T0244300WE	-0.487336	0.105471	0.406398	0.00307224	1.12043	0.0275016	0.00993463	0.328802	-0.0255189	0.256213	0.371751	0.0453003	monocopper oxidase-like protein SKS1; K19791 iron transport multicopper oxidase (A)	Monocopper oxidase-like protein SKU5 OS=Arabidopsis thaliana GN=SKU5 PE=1 SV=1	Multicopper oxidase
BnaC06T0457200WE	0.0308669	0.353863	0.110866	0.0276759	1.14138	0.00216183	-0.248945	0.153356	-0.101756	0.129278	0.107439	0.326174	glutathione S-transferase U21-like; K00799 glutathione S-transferase [EC:2.5.1.18] (A)	Glutathione S-transferase U21 OS=Arabidopsis thaliana GN=GSTU21 PE=3 SV=1	Glutathione S-transferase, C-terminal domain
BnaA10T0165900WE	-0.455933	0.0129485	1.08139	0.00988421	1.1602	0.00449159	0.66414	0.12148	0.0198356	0.324522	0.795038	0.0173453	BcAAO; L-ascorbate oxidase; K00423 L-ascorbate oxidase [EC:1.10.3.3] (A)	L-ascorbate oxidase OS=Cucumis sativus PE=1 SV=1	Multicopper oxidase
BnaA02T0218900WE	-0.156546	0.0523994	0.5111	0.017035	1.16356	0.0252402	0.32438	0.0718486	0.150737	0.0479154	0.705919	0.0717268	L-ascorbate oxidase homolog; K19791 iron transport multicopper oxidase (A)	L-ascorbate oxidase homolog OS=Brassica napus GN=Bp10 PE=2 SV=1	Multicopper oxidase
BnaA08T0058100WE	-1.00506	0.0963073	0.385597	0.0864262	1.21418	0.0514787	-0.0978602	0.0138625	-0.565897	0.0283666	0.464201	0.0981483	L-ascorbate oxidase homolog; K19791 iron transport multicopper oxidase (A)	L-ascorbate oxidase homolog OS=Brassica napus GN=Bp10 PE=2 SV=1	Multicopper oxidase
BnaA02T0251000WE	-0.307747	0.108227	0.699309	0.0015037	1.22906	0.0203445	-0.375284	0.160404	-0.0148414	0.206424	0.368936	0.0809971	monocopper oxidase-like protein SKS1; K19791 iron transport multicopper oxidase (A)	Monocopper oxidase-like protein SKU5 OS=Arabidopsis thaliana GN=SKU5 PE=1 SV=1	Multicopper oxidase
BnaA04T0183500WE	-1.20345	0.14187	0.343876	0.139582	1.23666	0.0453892	-0.0167801	0.300465	-0.515244	0.041568	0.587248	0.0647851	laccase-3; K05909 laccase [EC:1.10.3.2] (A)	Laccase-3 OS=Arabidopsis thaliana GN=LAC3 PE=2 SV=2	Multicopper oxidase
BnaA01T0069000WE	-0.106061	0.153384	0.425741	0.0263046	1.27117	0.0171275	-0.271006	0.0525125	-0.112014	0.0919628	0.561376	0.0186709	monocopper oxidase-like protein SKS1; K19791 iron transport multicopper oxidase (A)	Monocopper oxidase-like protein SKS1 OS=Arabidopsis thaliana GN=SKS1 PE=1 SV=1	Multicopper oxidase
BnaA07T0279400WE	-0.801017	0.104813	-1.80632	0.0276089	1.33457	0.135978	-0.394628	0.112521	-1.00014	0.021976	-0.140453	0.218109	peroxiredoxin-2D; K03386 peroxiredoxin (alkyl hydroperoxide reductase subunit C) [EC:1.11.1.15] (A)	Peroxiredoxin-2B OS=Arabidopsis thaliana GN=PRXIIB PE=1 SV=1	Redoxin
BnaA07T0354600WE	-0.879507	0.118123	0.312476	0.137792	1.34114	0.0626722	-0.220556	0.0818088	-0.421174	0.0275244	0.399325	0.0476395	L-ascorbate oxidase homolog; K19791 iron transport multicopper oxidase (A)	L-ascorbate oxidase homolog OS=Brassica napus GN=Bp10 PE=2 SV=1	Multicopper oxidase
BnaC07T0476300WE	-0.794664	0.0918852	0.6713	0.00956492	1.45924	0.0286347	-0.291239	0.101622	-1.17916	0.0437313	0.259695	0.20176	L-ascorbate oxidase homolog; K19791 iron transport multicopper oxidase (A)	L-ascorbate oxidase homolog OS=Brassica napus GN=Bp10 PE=2 SV=1	Multicopper oxidase
Bnascaffold286T0024500WE	0.224527	0.0438172	-0.0017466	0.325692	1.52727	0.0101343	0.219998	0.272163	-0.132625	0.0905582	0.691445	0.0273369	L-ascorbate peroxidase 5, peroxisomal; K00434 L-ascorbate peroxidase [EC:1.11.1.11] (A)	L-ascorbate peroxidase 5, peroxisomal OS=Arabidopsis thaliana GN=APX5 PE=2 SV=2	Peroxidase
BnaC07T0170100WE	0.351944	0.0297641	0.246378	0.0549036	1.59134	0.00208116	0.234635	0.103765	-0.333914	0.0300798	0.154281	0.071226	catalase-3; K03781 catalase [EC:1.11.1.6] (A)	Catalase-3 OS=Arabidopsis thaliana GN=CAT3 PE=1 SV=3	Catalase-related immune-responsive	Occurs in almost all aerobically respiring organisms and serves to protect cells from the toxic effects of hydrogen peroxide.
BnaA10T0016800WE	0.0412164	0.290667	0.475282	0.0158424	1.97805	0.0128508	0.192097	0.0505354	0.148388	0.0927363	0.768766	0.0715658	glutathione S-transferase F4; K00799 glutathione S-transferase [EC:2.5.1.18] (A)	Glutathione S-transferase F4 OS=Arabidopsis thaliana GN=GSTF4 PE=2 SV=1	Glutathione S-transferase, C-terminal domain
BnaA05T0398400WE	-0.833751	0.168147	0.470617	0.0584113	2.1464	0.0648628	-0.624312	0.0655938	-0.850651	0.0379968	0.385655	0.0329056	laccase-7; K05909 laccase [EC:1.10.3.2] (A)	Laccase-7 OS=Arabidopsis thaliana GN=LAC7 PE=2 SV=1	Multicopper oxidase
BnaC05T0492500WE	-0.828577	0.121943	0.786847	0.0186111	2.38849	0.0837035	0.168941	0.261756	-1.47902	0.0183639	0.727711	0.0403389	laccase-7; K05909 laccase [EC:1.10.3.2] (A)	Laccase-7 OS=Arabidopsis thaliana GN=LAC7 PE=2 SV=1	Multicopper oxidase
BnaC04T0171700WE	-1.42077	0.127094	-4.49319	0.254998	2.42718	0.0154568	-1.86512	0.0552377	-0.549548	0.109433	0.41138	0.0498064	laccase-3; K05909 laccase [EC:1.10.3.2] (A)	Laccase-3 OS=Arabidopsis thaliana GN=LAC3 PE=2 SV=2	Multicopper oxidase

## Sheet: (E) R genes
Table S8 E. Differentially abundant proteins related to resistance genes (R-genes). Res = clubroot resistant genotype, Sus = clubroot susceptible genotype,T = pathogen inoculated, C= uninoculated. the numbers 1, 4, and 7 indicate days post pathogen inoculation.
Proteins	Log2 fold change Res1T.C	Qvalue Res1T.C	Log2 fold change Res4T.C	Qvalue Res4T.C	Log2 fold change Res7T.C	Qvalue Res7T.C	Log2 fold change Sus1T.C	Qvalue Sus1T.C	Log2 fold change Sus4T.C	Qvalue Sus4T.C	Log2 fold change Sus7T.C	Qvalue Sus7T.C	KEGG	Swissprot	Pfam
BnaA01T0280300WE	-3.07324	0.12801	-0.506776	0.154981	1.51095	0.0492888	-0.476676	0.12124	-1.14728	0.00448426	0.0426222	0.159452	LRR receptor-like serine/threonine-protein kinase FLS2; K13420 LRR receptor-like serine/threonine-protein kinase FLS2 [EC:2.7.11.1] (A)	DNA-damage-repair/toleration protein DRT100 OS=Arabidopsis thaliana GN=DRT100 PE=2 SV=2	Leucine rich repeat N-terminal domain
BnaA02T0046000WE	-1.491	0.164754	0.198125	0.232222	1.50958	0.0828119	-0.528335	0.00760828	-0.897867	0.0136742	0.18074	0.139038	Leucine-rich receptor-like protein kinase family protein; K13420 LRR receptor-like serine/threonine-protein kinase FLS2 [EC:2.7.11.1] (A)	DNA-damage-repair/toleration protein DRT100 OS=Arabidopsis thaliana GN=DRT100 PE=2 SV=2	Leucine rich repeat N-terminal domain
BnaA03T0181900WE	-0.661097	0.137312	-0.346028	0.358491	0.987512	0.0537032	-0.384138	0.307878	-1.42451	0.0164643	0.582247	0.0120503	Eix1; EIX receptor 1; K13466 EIX receptor 1/2 (A)	LRR receptor-like serine/threonine-protein kinase GSO1 OS=Arabidopsis thaliana GN=GSO1 PE=2 SV=1	Leucine rich repeat N-terminal domain
BnaA03T0417300WE	0.0762529	0.185171	0.118412	0.0865278	0.683775	0.00336019	-0.296341	0.009159	0.31001	0.0357712	0.265475	0.0367657	Leucine-rich repeat protein kinase family protein, putative; K13420 LRR receptor-like serine/threonine-protein kinase FLS2 [EC:2.7.11.1] (A)	Leucine-rich repeat receptor protein kinase MSP1 OS=Oryza sativa subsp. japonica GN=MSP1 PE=1 SV=1	Leucine rich repeat N-terminal domain
BnaA05T0158900WE	-0.875454	0.0354283	-0.2066	0.226046	0.00602458	0.200682	-0.0904143	0.225827	0.478379	0.109905	0.249925	0.3199	probable LRR receptor-like serine/threonine-protein kinase At1g53440; K04733 interleukin-1 receptor-associated kinase 4 [EC:2.7.11.1] (A)	Probable LRR receptor-like serine/threonine-protein kinase At1g53430 OS=Arabidopsis thaliana GN=At1g53430 PE=1 SV=1	Leucine Rich Repeat
BnaA05T0300700WE	-0.570083	0.0341784	-0.338096	0.188558	0.157616	0.337176	-0.60406	0.100425	0.0387135	0.141246	0.251892	0.368255	LRR receptor-like serine/threonine-protein kinase FLS2; K13420 LRR receptor-like serine/threonine-protein kinase FLS2 [EC:2.7.11.1] (A)	DNA-damage-repair/toleration protein DRT100 OS=Arabidopsis thaliana GN=DRT100 PE=2 SV=2	Leucine rich repeat N-terminal domain
BnaA05T0317200WE	-1.5146	0.260838	0.328265	0.136005	2.07733	0.0245732	0.148424	0.205814	-0.568739	0.0492	0.640876	0.0332599	hypothetical protein; K02984 small subunit ribosomal protein S3Ae (A)	Uncharacterized protein At4g06744 OS=Arabidopsis thaliana GN=At4g06744 PE=2 SV=1	Leucine Rich Repeat
BnaA06T0339200WE	-0.0285478	0.255686	0.559935	0.0385002	0.871292	0.00345405	0.226173	0.296549	0.193876	0.180798	1.17725	0.00983967	receptor protein kinase CLAVATA1; K00924 [EC:2.7.1.-] (A)	Leucine-rich repeat receptor-like serine/threonine-protein kinase BAM1 OS=Arabidopsis thaliana GN=BAM1 PE=1 SV=1	Leucine rich repeat N-terminal domain
BnaA06T0352800WE	-0.354453	0.039955	0.627022	0.00417898	1.337	0.00865664	-0.243347	0.20041	0.0630709	0.355319	0.641792	0.0537106	LRR receptor-like serine/threonine-protein kinase EFR; K13420 LRR receptor-like serine/threonine-protein kinase FLS2 [EC:2.7.11.1] (A)	Leucine-rich repeat receptor-like protein kinase PXC2 OS=Arabidopsis thaliana GN=PXC2 PE=2 SV=1	Leucine rich repeat N-terminal domain
BnaA07T0197100WE	-0.0611613	0.341689	-0.117769	0.263177	0.404633	0.0565525	1.04164	0.00631909	0.0383283	0.351912	0.422703	0.0964549	probable LRR receptor-like serine/threonine-protein kinase At1g56140; K04733 interleukin-1 receptor-associated kinase 4 [EC:2.7.11.1] (A)	Probable LRR receptor-like serine/threonine-protein kinase At1g56130 OS=Arabidopsis thaliana GN=At1g56130 PE=2 SV=2	Leucine rich repeat
BnaA08T0259000WE	-1.64201	0.121498	-0.544207	0.217876	0.901778	0.207771	-0.788679	0.0524821	-2.43872	0.00574672	0.191557	0.267363	hypothetical protein; K02984 small subunit ribosomal protein S3Ae (A)	Leucine-rich repeat extensin-like protein 1 OS=Arabidopsis thaliana GN=LRX1 PE=1 SV=1	Leucine-rich repeat extensin-like protein 1 OS=Arabidopsis thaliana GN=LRX1 PE=1 SV=1
BnaA09T0356300WE	-0.648065	0.05436	-0.120336	0.335408	0.0619131	0.37184	-0.138426	0.379639	-0.45588	0.0169814	0.0921437	0.216419	SORBIDRAFT_06g028760, Sb06g028760; hypothetical protein; K13420 LRR receptor-like serine/threonine-protein kinase FLS2 [EC:2.7.11.1] (A)	DNA-damage-repair/toleration protein DRT100 OS=Arabidopsis thaliana GN=DRT100 PE=2 SV=2	Leucine rich repeat N-terminal domain
BnaA10T0072300WE	-0.370778	0.0342217	0.120893	0.041429	1.14086	0.00164551	-0.0654529	0.375724	0.04294	0.368117	0.696461	0.0524635	POPTRDRAFT_756677; hypothetical protein; K04730 interleukin-1 receptor-associated kinase 1 [EC:2.7.11.1] (A)	Probable leucine-rich repeat receptor-like protein kinase At5g49770 OS=Arabidopsis thaliana GN=At5g49770 PE=2 SV=1	Leucine rich repeat N-terminal domain
BnaC02T0238000WE	0.108065	0.218502	0.0691506	0.331784	0.761004	0.0602945	0.718173	0.0130216	0.289213	0.0598908	0.441269	0.0695255	probable LRR receptor-like serine/threonine-protein kinase At1g56140; K04733 interleukin-1 receptor-associated kinase 4 [EC:2.7.11.1] (A)	Probable LRR receptor-like serine/threonine-protein kinase At1g56130 OS=Arabidopsis thaliana GN=At1g56130 PE=2 SV=2	Protein tyrosine kinase
BnaC03T0230200WE	-0.768624	0.105886	-0.621576	0.00761929	-0.0888836	0.313665	1.39827	0.0421752	-0.341775	0.16217	-0.369813	0.0202453	LRR receptor-like serine/threonine-protein kinase FLS2; K13420 LRR receptor-like serine/threonine-protein kinase FLS2 [EC:2.7.11.1] (A)	Probable LRR receptor-like serine/threonine-protein kinase At4g08850 OS=Arabidopsis thaliana GN=At4g08850 PE=2 SV=3	Leucine rich repeat N-terminal domain
BnaC03T0320500WE	0.147729	0.0576173	0.179918	0.224584	-1.17866	0.00327083	1.09959	0.295176	0.282537	0.0980227	0.0727083	0.294441	SHOC2; soc-2 suppressor of clear homolog (C. elegans); K19613 leucine-rich repeat protein SHOC2 (A)	Plant intracellular Ras-group-related LRR protein 9 OS=Arabidopsis thaliana GN=PIRL9 PE=2 SV=1	Leucine Rich Repeat
BnaC07T0234600WE	-0.270685	0.0921272	-0.185739	0.325847	0.642901	0.131696	-0.345185	0.0329973	0.691539	0.184565	-0.167278	0.169674	hypothetical protein; K16225 probable WRKY transcription factor 52 (A)	Protein DA1-related 4 OS=Arabidopsis thaliana GN=DAR4 PE=1 SV=2	NB-ARC domain
BnaC07T0366800WE	-0.534091	0.024162	0.486803	0.0035971	1.32588	0.0143341	-0.186334	0.383793	-0.101946	0.299635	0.599191	0.066778	LRR receptor-like serine/threonine-protein kinase FLS2; K13420 LRR receptor-like serine/threonine-protein kinase FLS2 [EC:2.7.11.1] (A)	Receptor-like protein 12 OS=Arabidopsis thaliana GN=RLP12 PE=2 SV=2	Leucine rich repeat N-terminal domain
BnaC08T0281300WE	0.324025	0.32992	-0.351458	0.134961	0.269492	0.246108	0.329415	0.259092	-0.146184	0.0355387	-0.818658	0.0193778	hypothetical protein; K16226 disease resistance protein RPS4 (A)	Disease resistance protein RPP4 OS=Arabidopsis thaliana GN=RPP4 PE=1 SV=1	Leucine Rich Repeat
BnaC09T0298700WE	-0.140095	0.33957	-0.0400381	0.242522	0.977734	0.0118268	-1.89863	0.0645273	-0.0189996	0.00500895	0.826035	0.000449442	POPTRDRAFT_756677; hypothetical protein; K04730 interleukin-1 receptor-associated kinase 1 [EC:2.7.11.1] (A)	Probable leucine-rich repeat receptor-like protein kinase At5g49770 OS=Arabidopsis thaliana GN=At5g49770 PE=2 SV=1	Leucine rich repeat N-terminal domain

## Sheet: (F) Lignin
Table S8 F. Differentially abundant proteins related to lignin. Res = clubroot resistant genotype, Sus = clubroot susceptible genotype,T = pathogen inoculated, C= uninoculated. the numbers 1, 4, and 7 indicate days post pathogen inoculation.
Proteins	Log2 fold change Res1T.C	Qvalue Res1T.C	Log2 fold change Res4T.C	Qvalue Res4T.C	Log2 fold change Res7T.C	Qvalue Res7T.C	Log2 fold change Sus1T.C	Qvalue Sus1T.C	Log2 fold change Sus4T.C	Qvalue Sus4T.C	Log2 fold change Sus7T.C	Qvalue Sus7T.C	KEGG	Swissprot	Pfam
BnaA03T0521600WE	0.854367	0.0447405	-1.14378	0.0334122	-1.5354	0.0489334	-2.57085	0.224512	-0.343473	0.120041	0.336465	0.244964	peroxidase 45; K00430 peroxidase [EC:1.11.1.7] (A)	Peroxidase 45 OS=Arabidopsis thaliana GN=PER45 PE=1 SV=1	Peroxidase
BnaC01T0221000WE	0.898975	0.0131137	-0.976904	0.0222077	-0.86511	0.0498927	0.572695	0.35995	-0.177846	0.234572	0.201398	0.119156	peroxidase 34-like; K00430 peroxidase [EC:1.11.1.7] (A)	Peroxidase 34 OS=Arabidopsis thaliana GN=PER34 PE=1 SV=1	Peroxidase
BnaC05T0378500WE	0.0343298	0.0267663	0.0890359	0.270813	0.704352	0.00357293	0.167699	0.09092	0.186884	0.0194513	0.0813465	0.0851774	CADa-2; cinnamyl alcohol dehydrogenase 4-like; K00083 cinnamyl-alcohol dehydrogenase [EC:1.1.1.195] (A)	Cinnamyl alcohol dehydrogenase 4 OS=Arabidopsis thaliana GN=CAD4 PE=1 SV=1	Zinc-binding dehydrogenase
BnaA08T0082600WE	0.339576	0.123358	0.536897	0.103145	0.906262	0.0343982	-0.283351	0.106171	-0.139969	0.165935	0.755794	0.00738291	putative caffeoyl-CoA O-methyltransferase At1g67980; K00588 caffeoyl-CoA O-methyltransferase [EC:2.1.1.104] (A)	Putative caffeoyl-CoA O-methyltransferase At1g67980 OS=Arabidopsis thaliana GN=At1g67980 PE=2 SV=1	O-methyltransferase
BnaA03T0548900WE	-0.33958	0.0544545	0.318315	0.0185165	0.928571	0.00156698	0.512578	0.0141372	0.305074	0.0185547	0.291099	0.0507701	cinnamyl alcohol dehydrogenase 5; K00083 cinnamyl-alcohol dehydrogenase [EC:1.1.1.195] (A)	Cinnamyl alcohol dehydrogenase 5 OS=Arabidopsis thaliana GN=CAD5 PE=1 SV=1	Zinc-binding dehydrogenase
BnaA04T0249700WE	0.25772	0.218315	-0.639079	0.0266718	1.1326	0.0132143	-0.326447	0.323421	0.287381	0.0134634	0.621902	0.00318083	cytochrome P450 98A3-like; K09754 coumaroylquinate(coumaroylshikimate) 3'-monooxygenase [EC:1.14.13.36] (A)	Cytochrome P450 98A3 OS=Arabidopsis thaliana GN=CYP98A3 PE=1 SV=1	Cytochrome P450
BnaA05T0316200WE	-0.654111	0.111077	0.323125	0.135013	1.16973	0.0203247	0.468765	0.253452	-0.321256	0.133302	-0.108493	0.0450166	cinnamyl alcohol dehydrogenase 4; K00083 cinnamyl-alcohol dehydrogenase [EC:1.1.1.195] (A)	Cinnamyl alcohol dehydrogenase 4 OS=Arabidopsis thaliana GN=CAD4 PE=1 SV=1	Zinc-binding dehydrogenase
BnaA10T0035500WE	-1.90488	0.0636336	-0.666458	0.164759	1.20171	0.0207249	-1.29559	0.0704843	-2.57236	0.0158906	-0.0823627	0.353488	peroxidase 2-like; K00430 peroxidase [EC:1.11.1.7] (A)	Peroxidase 2 OS=Arabidopsis thaliana GN=PER2 PE=2 SV=1	Peroxidase
BnaA04T0183500WE	-1.20345	0.14187	0.343876	0.139582	1.23666	0.0453892	-0.0167801	0.300465	-0.515244	0.041568	0.587248	0.0647851	laccase-3; K05909 laccase [EC:1.10.3.2] (A)	Laccase-3 OS=Arabidopsis thaliana GN=LAC3 PE=2 SV=2	Multicopper oxidase
BnaC09T0113900WE	-0.940718	0.0152055	0.0364947	0.358336	1.25458	0.0254546	-0.847068	0.0112003	-0.680811	0.0033959	-0.443331	0.175132	peroxidase 32-like; K00430 peroxidase [EC:1.11.1.7] (A)	Peroxidase 32 OS=Arabidopsis thaliana GN=PER32 PE=1 SV=3	GDSL/SGNH-like Acyl-Esterase family found in Pmr5 and Cas1p
BnaA01T0039700WE	-0.151939	0.122646	0.366579	0.0568083	1.27646	0.00356441	-0.208156	0.161984	0.764325	0.030084	0.877675	0.0235668	peroxidase 42; K00430 peroxidase [EC:1.11.1.7] (A)	Peroxidase 42 OS=Arabidopsis thaliana GN=PER42 PE=1 SV=2	Peroxidase
BnaC02T0060900WE	-0.787837	0.10276	0.0711769	0.175694	1.31008	0.0393731	-0.238476	0.211854	-0.556338	0.0777463	0.344875	0.0920979	peroxidase 56-like; K00430 peroxidase [EC:1.11.1.7] (A)	Peroxidase 56 OS=Arabidopsis thaliana GN=PER56 PE=2 SV=1	Peroxidase
BnaC01T0310600WE	-0.0782027	0.259607	0.442595	0.00572218	1.37464	0.00789679	0.298037	0.0990932	-0.168135	0.11539	0.705867	0.066683	peroxidase 30; K00430 peroxidase [EC:1.11.1.7] (A)	Peroxidase 30 OS=Arabidopsis thaliana GN=PER30 PE=1 SV=1	Peroxidase
BnaA06T0302400WE	-0.466202	0.197246	0.429095	0.0292054	1.37482	0.0236577	-0.347702	0.253118	-0.582205	0.0652567	0.626857	0.0737353	peroxidase 44-like; K00430 peroxidase [EC:1.11.1.7] (A)	Peroxidase 44 OS=Arabidopsis thaliana GN=PER44 PE=2 SV=1	Peroxidase
BnaA09T0560200WE	0.423366	0.0743616	0.11106	0.301201	1.46051	0.017098	-0.797766	0.0280435	-0.0539856	0.122867	0.68517	0.0130675	peroxidase 17-like; K00430 peroxidase [EC:1.11.1.7] (A)	Peroxidase 17 OS=Arabidopsis thaliana GN=PER17 PE=2 SV=1	Peroxidase
BnaC02T0293500WE	0.595251	0.167732	0.455799	0.178284	1.47678	0.00560213	-1.33891	0.013398	-0.143032	0.0319044	0.643301	0.0230312	caffeic acid 3-O-methyltransferase-like; K13066 caffeic acid 3-O-methyltransferase [EC:2.1.1.68] (A)	Caffeic acid 3-O-methyltransferase OS=Prunus dulcis GN=COMT1 PE=2 SV=1	Dimerisation domain
BnaC07T0053500WE	-0.915479	0.126701	0.115341	0.268439	1.54268	0.0250925	-1.01979	0.0448322	0.110707	0.381077	0.421301	0.0571818	peroxidase 64; K00430 peroxidase [EC:1.11.1.7] (A)	Peroxidase 64 OS=Arabidopsis thaliana GN=PER64 PE=1 SV=1	Peroxidase
BnaC05T0255900WE	-1.69555	0.145131	-0.870606	0.0632446	1.60908	0.0441278	1.34761	0.359815	-0.288941	0.351373	0.30569	0.258847	peroxidase 7-like; K00430 peroxidase [EC:1.11.1.7] (A)	Peroxidase 7 OS=Arabidopsis thaliana GN=PER7 PE=2 SV=1	Peroxidase
BnaC05T0345700WE	0.185369	0.122248	0.469418	0.00709493	1.61017	0.0130197	-0.0626745	0.191359	-0.192443	0.0178726	0.589291	0.0535537	peroxidase 30-like; K00430 peroxidase [EC:1.11.1.7] (A)	Peroxidase 30 OS=Arabidopsis thaliana GN=PER30 PE=1 SV=1	Peroxidase
BnaC04T0171700WE	-1.42077	0.127094	-4.49319	0.254998	2.42718	0.0154568	-1.86512	0.0552377	-0.549548	0.109433	0.41138	0.0498064	laccase-3; K05909 laccase [EC:1.10.3.2] (A)	Laccase-3 OS=Arabidopsis thaliana GN=LAC3 PE=2 SV=2	Multicopper oxidase

## Sheet: (G) Dehydrins & related
Table S8 G. Differentially abundant proteins related to dehydrins. Res = clubroot resistant genotype, Sus = clubroot susceptible genotype,T = pathogen inoculated, C= uninoculated. the numbers 1, 4, and 7 indicate days post pathogen inoculation.
Proteins	Log2 fold change Res1T.C	Qvalue Res1T.C	Log2 fold change Res4T.C	Qvalue Res4T.C	Log2 fold change Res7T.C	Qvalue Res7T.C	Log2 fold change Sus1T.C	Qvalue Sus1T.C	Log2 fold change Sus4T.C	Qvalue Sus4T.C	Log2 fold change Sus7T.C	Qvalue Sus7T.C	KEGG	Swissprot	Pfam
BnaA07T0239200WE	-1.11583	0.0271765	-0.0909337	0.0933993	1.24122	0.00160905	0.328969	0.0709756	0.301571	0.0371603	0.0674934	0.244332	--	Dehydrin ERD14 OS=Arabidopsis thaliana GN=ERD14 PE=1 SV=1	Dehydrin
BnaA06T0140500WE	-0.335678	0.0100109	-0.659938	0.0301942	1.78081	0.00311288	-0.448661	0.0872992	0.313062	0.00663399	0.308298	0.0284741	--	Dehydrin ERD10 OS=Arabidopsis thaliana GN=ERD10 PE=1 SV=1	Dehydrin
BnaA01T0235800WE	-0.48174	0.0238574	-0.121592	0.298185	0.618301	0.00356835	-0.791705	0.170697	0.111666	0.359811	0.156032	0.280404	hypothetical protein; K16292 KDEL-tailed cysteine endopeptidase [EC:3.4.22.-] (A)	Cysteine proteinase RD21a OS=Arabidopsis thaliana GN=RD21A PE=1 SV=1	Granulin
BnaA02T0219000WE	-0.0904796	0.182805	-0.219552	0.095584	0.950683	0.00434034	0.261018	0.0688276	-0.0767552	0.0616156	0.0929797	0.272916	--	Dehydrin ERD14 OS=Arabidopsis thaliana GN=ERD14 PE=1 SV=1	Dehydrin
BnaA07T0354800WE	-0.112557	0.232461	-0.263293	0.0501764	1.3258	0.00986072	0.096894	0.211538	-0.171362	0.0165614	0.0767975	0.301814	--	Dehydrin ERD14 OS=Arabidopsis thaliana GN=ERD14 PE=1 SV=1	Dehydrin
BnaC02T0364000WE	0.0322514	0.374325	0.139515	0.220399	1.16563	0.0112968	0.169343	0.143322	0.0560306	0.37247	0.056645	0.23836	hypothetical protein; K16292 KDEL-tailed cysteine endopeptidase [EC:3.4.22.-] (A)	Cysteine proteinase RD21a OS=Arabidopsis thaliana GN=RD21A PE=1 SV=1	Granulin
BnaA10T0060800WE	-0.238894	0.0320743	0.333231	0.108437	2.43661	0.0118635	-0.483329	0.0953007	0.154187	0.30708	0.511311	0.112504	hypothetical protein; K16292 KDEL-tailed cysteine endopeptidase [EC:3.4.22.-] (A)	Cysteine proteinase RD21a OS=Arabidopsis thaliana GN=RD21A PE=1 SV=1	Granulin
BnaA08T0045300WE	-0.0990908	0.161086	0.15965	0.199326	1.60055	0.0121768	0.60683	0.00704278	0.246797	0.263727	0.381638	0.122248	hypothetical protein; K16292 KDEL-tailed cysteine endopeptidase [EC:3.4.22.-] (A)	Cysteine proteinase RD21a OS=Arabidopsis thaliana GN=RD21A PE=1 SV=1	Granulin
BnaC06T0291300WE	-0.742137	0.0391166	0.0672269	0.314971	1.84883	0.012188	-0.111163	0.190285	0.705676	0.020129	-0.26984	0.184076	--	Dehydrin ERD14 OS=Arabidopsis thaliana GN=ERD14 PE=1 SV=1	Dehydrin
BnaC05T0074700WE	-0.130291	0.108443	0.298047	0.0617551	1.14196	0.0124192	-0.549005	0.0854673	0.145835	0.339643	0.286274	0.0964258	hypothetical protein; K16292 KDEL-tailed cysteine endopeptidase [EC:3.4.22.-] (A)	Cysteine proteinase RD21a OS=Arabidopsis thaliana GN=RD21A PE=1 SV=1	Granulin
BnaC06T0439800WE	-0.635675	0.0732178	0.264101	0.225578	1.88444	0.0141377	-0.572903	0.031804	0.353986	0.0256583	-0.76202	0.0152688	--	Dehydrin ERD14 OS=Arabidopsis thaliana GN=ERD14 PE=1 SV=1	Dehydrin
BnaC05T0379600WE	0.258785	0.0494844	0.106238	0.117518	0.91612	0.018334	-0.0388411	0.264764	-0.300199	0.00357275	0.0242467	0.31489	hypothetical protein; K16292 KDEL-tailed cysteine endopeptidase [EC:3.4.22.-] (A)	Cysteine proteinase RD21a OS=Arabidopsis thaliana GN=RD21A PE=1 SV=1	Granulin
BnaC04T0209600WE	0.0228478	0.310838	0.0554065	0.370929	0.729953	0.0185877	-0.0158517	0.336428	0.213995	0.155719	0.124115	0.115937	hypothetical protein; K16292 KDEL-tailed cysteine endopeptidase [EC:3.4.22.-] (A)	Cysteine proteinase RD21a OS=Arabidopsis thaliana GN=RD21A PE=1 SV=1	Granulin
BnaA07T0126200WE	-0.390609	0.200546	-0.417948	0.0675545	1.08884	0.0604296	-0.877798	0.12736	-1.05684	0.0272451	0.0526623	0.135845	--	Dehydrin ERD10 OS=Arabidopsis thaliana GN=ERD10 PE=1 SV=1	Dehydrin
