# Supplementary material for: Proteome- and metabolome-level changes during early stages of clubroot infection in Brassica napus canola
Source: Royal Society of Chemistry journal article supplement (doi:10.1039/d3mo00210a), 2024-01-22
Supplement: d3mo00210a10.xlsx [file d3mo00210a10.xlsx]

## Sheet: (A) Transcriptome - early stage
Table 8 A. Proteins that were common between current root proteome and earlier root transcriptome analysis [10]. This list of proteins were significantly differentially abundant in one or more times points in the current study. The values at different time points indicate the log2 fold change between pathogen inoculated and uninoculated samples. A subset of top 30 proteins that were significant a…
Proteins	Log2 fold change Res1T.C	Qvalue Res1T.C	Log2 fold change Res4T.C	Qvalue Res4T.C	Log2 fold change Res7T.C	Qvalue Res7T.C	Log2 fold change Sus1T.C	Qvalue Sus1T.C	Log2 fold change Sus4T.C	Qvalue Sus4T.C	Log2 fold change Sus7T.C	Qvalue Sus7T.C	KEGG	Swissprot	Pfam
BnaA01T0150300WE	-0.224182	0.129152	0.36091	0.00796371	0.518697	0.0226772	-0.581799	0.0276914	0.153573	0.37716	0.434305	0.00271627	villin-4-like; K05768 gelsolin (A)	Villin-4 OS=Arabidopsis thaliana GN=VLN4 PE=1 SV=1	Villin headpiece domain
BnaA01T0154200WE	0.555079	0.0761085	0.55675	0.0538125	0.180922	0.374181	-2.35514	0.113222	-0.279549	0.139507	-0.849773	0.000674676	venom phosphodiesterase 2-like; K01513 ectonucleotide pyrophosphatase/phosphodiesterase family member 1/3 [EC:3.1.4.1 3.6.1.9] (A)	Venom phosphodiesterase 2 OS=Crotalus adamanteus PE=1 SV=1	Type I phosphodiesterase / nucleotide pyrophosphatase
BnaA01T0154400WE	-0.137907	0.24393	0.142778	0.136528	0.783659	0.0103607	-0.711239	0.02827	-0.150283	0.151629	0.29196	0.0427674	ectonucleotide pyrophosphatase/phosphodiesterase family member 1; K01513 ectonucleotide pyrophosphatase/phosphodiesterase family member 1/3 [EC:3.1.4.1 3.6.1.9] (A)	Thioredoxin-like 2-2, chloroplastic OS=Arabidopsis thaliana GN=At4g29670 PE=2 SV=2	Thioredoxin
BnaA01T0155000WE	-0.0835438	0.315708	-0.12697	0.0664705	0.276697	0.0243808	-1.60919	0.177426	0.231402	0.182471	0.0573822	0.114758	xaa-Pro dipeptidase; K14213 Xaa-Pro dipeptidase [EC:3.4.13.9] (A)	Xaa-Pro dipeptidase OS=Homo sapiens GN=PEPD PE=1 SV=3	Aminopeptidase P, N-terminal domain
BnaA01T0156100WE	0.166806	0.0328633	-0.87539	0.103427	-0.338507	0.0848133	1.20424	0.00375661	-0.740368	0.0456499	-0.153199	0.0572243	40S ribosomal protein S30; K02983 small subunit ribosomal protein S30e (A)	40S ribosomal protein S30 OS=Arabidopsis thaliana GN=RPS30A PE=3 SV=3	Ribosomal protein S30
BnaA01T0214900WE	-0.294294	0.219148	-0.0942498	0.217647	-0.895214	0.00582872	0.379376	0.0720943	0.16226	0.0831214	0.0637256	0.237178	hypothetical protein; K14825 protein ERP2 (A)	Transmembrane emp24 domain-containing protein p24beta3 OS=Arabidopsis thaliana GN=At3g22845 PE=2 SV=1	emp24/gp25L/p24 family/GOLD
BnaA01T0217700WE	-0.232001	0.0538552	0.433515	0.099405	0.75726	0.013782	-0.432062	0.0957867	0.0417007	0.154401	0.301843	0.0917795	linoleate 9S-lipoxygenase 5, chloroplastic; K15718 linoleate 9S-lipoxygenase [EC:1.13.11.58] (A)	Linoleate 9S-lipoxygenase 5, chloroplastic OS=Arabidopsis thaliana GN=LOX5 PE=2 SV=2	PLAT/LH2 domain
BnaA01T0219100WE	0.349722	0.0430905	0.503622	0.024075	0.938763	0.00602288	0.127894	0.168428	0.200696	0.137567	-0.127173	0.227296	gamma-aminobutyrate transaminase POP2, mitochondrial-like; K16871 4-aminobutyrate---pyruvate transaminase [EC:2.6.1.96] (A)	Gamma-aminobutyrate transaminase POP2, mitochondrial OS=Arabidopsis thaliana GN=POP2 PE=1 SV=1	Aminotransferase class-III
BnaA01T0234400WE	0.0687316	0.256134	0.243392	0.0736789	0.455189	0.0328216	-0.248529	0.00418563	0.363535	0.00950604	-0.58887	0.0314097	mitotic checkpoint protein BUB3.1; K02180 cell cycle arrest protein BUB3 (A)	Mitotic checkpoint protein BUB3.1 OS=Arabidopsis thaliana GN=BUB3.1 PE=1 SV=1	WD domain, G-beta repeat
BnaA01T0280300WE	-3.07324	0.12801	-0.506776	0.154981	1.51095	0.0492888	-0.476676	0.12124	-1.14728	0.00448426	0.0426222	0.159452	LRR receptor-like serine/threonine-protein kinase FLS2; K13420 LRR receptor-like serine/threonine-protein kinase FLS2 [EC:2.7.11.1] (A)	DNA-damage-repair/toleration protein DRT100 OS=Arabidopsis thaliana GN=DRT100 PE=2 SV=2	Leucine rich repeat N-terminal domain
BnaA01T0281300WE	-0.404376	0.00930942	-0.512691	0.0321954	1.36445	0.00492764	-2.41621	0.10999	0.0491335	0.103105	0.142636	0.327929	hypothetical protein; K08066 nuclear transcription factor Y, gamma (A)	Dr1-associated corepressor OS=Homo sapiens GN=DRAP1 PE=1 SV=3	Histone-like transcription factor (CBF/NF-Y) and archaeal histone
BnaA01T0282200WE	-0.292175	0.0675803	0.198043	0.00491908	0.99266	0.000407635	-5.63418	0.280262	0.103282	0.0211294	0.361866	0.00547598	transcription factor TGA6-like; K14431 transcription factor TGA (A)	Transcription factor TGA6 OS=Arabidopsis thaliana GN=TGA6 PE=1 SV=2	bZIP transcription factor
BnaA01T0331900WE	0.0629388	0.338335	0.45356	0.212759	-0.240553	0.344548	-2.14942	0.0236264	0.495793	0.131363	-0.0247525	0.0186342	dnaJ homolog subfamily B member 13-like; K09510 DnaJ homolog subfamily B member 4 (A)	DnaJ homolog subfamily B member 13 OS=Mus musculus GN=Dnajb13 PE=2 SV=1	DnaJ C terminal domain
BnaA01T0334000WE	-1.1686	0.0147156	0.162559	0.0593185	-0.950533	0.32168	1.38278	0.220496	0.825527	0.123836	0.754599	0.0313892	--	--	Protein of unknown function (DUF642)
BnaA02T0000500WE	0.20796	0.139591	-0.061042	0.377002	-0.601159	0.0199951	0.0306051	0.308675	-0.0496486	0.115996	-0.32319	0.0358818	pyridoxal biosynthesis protein PDX1.3; K06215 pyridoxal 5'-phosphate synthase pdxS subunit [EC:4.3.3.6] (A)	Pyridoxal 5'-phosphate synthase subunit PDX1.3 OS=Arabidopsis thaliana GN=PDX13 PE=1 SV=2	SOR/SNZ family
BnaA02T0001300WE	-1.95622	0.0199414	-1.57442	0.13468	-2.98254	0.0354533	0.657684	0.00849784	-0.238245	0.26856	-1.592	0.042006	pyruvate decarboxylase 4; K01568 pyruvate decarboxylase [EC:4.1.1.1] (A)	Pyruvate decarboxylase 4 OS=Arabidopsis thaliana GN=PDC4 PE=2 SV=1	Thiamine pyrophosphate enzyme, C-terminal TPP binding domain
BnaA02T0040500WE	-0.473406	0.10174	0.197201	0.228141	-1.80222	0.00165369	-0.462383	0.295208	0.48199	0.118896	0.202859	0.306741	cwf24; zf-C3HC4 type (RING finger)/GCN5-related N acetyltransferase fusion protein; K13127 RING finger protein 113A (A)	N-alpha-acetyltransferase 50 OS=Danio rerio GN=naa50 PE=1 SV=1	Acetyltransferase (GNAT) family
BnaA02T0061300WE	-0.226842	0.136825	0.0626328	0.194371	-0.251513	0.104424	-0.185316	0.184615	0.0928769	0.144893	0.903037	0.00456687	NSDHL; NAD(P) dependent steroid dehydrogenase-like; K07748 sterol-4alpha-carboxylate 3-dehydrogenase (decarboxylating) [EC:1.1.1.170] (A)	Uncharacterized protein At1g32220, chloroplastic OS=Arabidopsis thaliana GN=At1g32220 PE=2 SV=1	NAD(P)H-binding
BnaA02T0085400WE	-0.0405671	0.228433	0.117768	0.11094	0.555769	0.0122168	-0.0669608	0.10229	0.235266	0.0155931	0.132584	0.018791	myosin-17-like; K10357 myosin V (A)	Myosin-17 OS=Arabidopsis thaliana GN=XI-K PE=1 SV=2	Myosin N-terminal SH3-like domain
BnaA02T0189100WE	0.119157	0.211632	0.0943462	0.234033	0.683653	0.0369812	-0.158135	0.238864	-0.432203	0.000999831	0.301947	0.0623144	--	MLP-like protein 28 OS=Arabidopsis thaliana GN=MLP28 PE=1 SV=1	Pathogenesis-related protein Bet v I family
BnaA03T0008600WE	0.104523	0.051343	-0.304202	0.0909925	-0.833477	0.00402348	-0.271364	0.00849284	-0.769604	0.0022827	-0.25866	0.0761038	glutamate dehydrogenase 2-like; K00261 glutamate dehydrogenase (NAD(P)+) [EC:1.4.1.3] (A)	Glutamate dehydrogenase 2 OS=Arabidopsis thaliana GN=GDH2 PE=1 SV=1	Glu/Leu/Phe/Val dehydrogenase, dimerisation domain
BnaA03T0024100WE	-0.668987	0.0807232	-0.118816	0.298306	-0.0119062	0.208055	1.18295	0.0194837	0.268758	0.182328	0.16576	0.171497	hypothetical protein; K14966 host cell factor (A)	Acyl-CoA-binding domain-containing protein 4 OS=Arabidopsis thaliana GN=ACBP4 PE=1 SV=1	Kelch motif
BnaA03T0043300WE	-0.338656	0.244655	0.0425276	0.36735	0.732944	0.00756937	0.279085	0.0662887	0.335075	0.0134048	-0.145952	0.0592858	heat shock 70 kDa protein 10, mitochondrial-like; K03283 heat shock 70kDa protein 1/8 (A)	Heat shock 70 kDa protein 10, mitochondrial OS=Arabidopsis thaliana GN=HSP70-10 PE=2 SV=1	Hsp70 protein
BnaA03T0058900WE	0.0968351	0.085287	0.0543457	0.341095	-0.690302	0.00407964	0.0335841	0.310121	0.437142	0.00895786	-0.340139	0.138648	diaminopimelate decarboxylase 2, chloroplastic; K01586 diaminopimelate decarboxylase [EC:4.1.1.20] (A)	Diaminopimelate decarboxylase 2, chloroplastic OS=Arabidopsis thaliana GN=LYSA2 PE=2 SV=1	Pyridoxal-dependent decarboxylase, C-terminal sheet domain
BnaA03T0072000WE	0.136236	0.143432	-0.624036	0.00630544	0.00818883	0.201781	0.549039	0.0256485	-0.00211086	0.296984	-0.0519456	0.167779	cytochrome b-c1 complex subunit Rieske-4, mitochondrial-like; K00411 ubiquinol-cytochrome c reductase iron-sulfur subunit [EC:1.10.2.2] (A)	Cytochrome b-c1 complex subunit Rieske, mitochondrial OS=Solanum tuberosum GN=FES1 PE=1 SV=1	Ubiquinol cytochrome reductase transmembrane region
BnaA03T0090200WE	-0.346508	0.0303266	1.2633	0.117714	1.1306	0.014921	0.353149	0.151528	0.177193	0.156733	-0.744006	0.0890228	gamma-tubulin complex component 2; K16569 gamma-tubulin complex component 2 (A)	Gamma-tubulin complex component 2 OS=Arabidopsis thaliana GN=GCP2 PE=1 SV=1	Spc97 / Spc98 family
BnaA03T0092800WE	0.140466	0.0667536	-0.224341	0.039979	0.168539	0.301725	-0.79497	0.020873	0.368992	0.0839457	0.352493	0.157893	apyrase 2-like; K14641 apyrase [EC:3.6.1.5] (A)	Apyrase 2 OS=Arabidopsis thaliana GN=APY2 PE=1 SV=1	GDA1/CD39 (nucleoside phosphatase) family
BnaA03T0199000WE	0.0340285	0.324125	-0.519291	0.0119744	0.5665	0.0195974	-0.177199	0.203498	-0.473375	0.00081593	-0.0401529	0.202729	peroxidase 22-like; K00430 peroxidase [EC:1.11.1.7] (A)	Peroxidase 22 OS=Arabidopsis thaliana GN=PER22 PE=1 SV=2	Peroxidase
BnaA03T0208200WE	-0.872778	0.123666	0.845443	0.0227316	-0.133473	0.160655	0.432482	0.259453	0.180822	0.302429	-0.759734	0.184792	hypothetical protein; K00688 starch phosphorylase [EC:2.4.1.1] (A)	Protein YIPF1 homolog OS=Dictyostelium discoideum GN=yipf1 PE=3 SV=1	Yip1 domain
BnaA03T0208900WE	0.0979952	0.356361	-0.815998	0.0076757	-0.794974	0.00342122	-0.271639	0.0484326	-0.0108822	0.293463	-0.00751646	0.153585	eukaryotic translation initiation factor 3 subunit F; K03249 translation initiation factor 3 subunit F (A)	Eukaryotic translation initiation factor 3 subunit F OS=Arabidopsis thaliana GN=TIF3F1 PE=1 SV=1	Maintenance of mitochondrial structure and function
BnaA03T0226400WE	0.731049	0.00727213	-0.570788	0.0584856	-0.446999	0.0289223	-0.252362	0.197779	0.280552	0.157767	0.207044	0.168138	mitogen-activated protein kinase 6-like; K14512 mitogen-activated protein kinase 6 [EC:2.7.11.24] (A)	Mitogen-activated protein kinase 6 OS=Arabidopsis thaliana GN=MPK6 PE=1 SV=1	Protein kinase domain
BnaA03T0228700WE	-0.198667	0.0115235	-0.498161	0.104914	0.373547	0.117667	0.889015	0.0323585	-0.0876982	0.151804	-0.174773	0.136506	uncharacterized LOC101760823; K17338 receptor expression-enhancing protein 1/2/3/4 (A)	--	EF-hand domain pair
BnaA03T0241500WE	0.249278	0.0403041	-0.824324	0.004381	-0.161818	0.116373	0.420438	0.171228	-0.14997	0.13107	0.186231	0.222565	glutathione S-transferase U5; K00799 glutathione S-transferase [EC:2.5.1.18] (A)	Glutathione S-transferase U5 OS=Arabidopsis thaliana GN=GSTU5 PE=2 SV=1	Glutathione S-transferase, N-terminal domain
BnaA03T0254100WE	0.126498	0.309747	0.220931	0.173375	0.0320017	0.193654	-0.155183	0.0593957	0.907028	0.0269817	-0.267508	0.0414668	E3 ubiquitin-protein ligase UPL6-like; K10589 ubiquitin-protein ligase E3 C [EC:2.3.2.26] (A)	Nuclear export mediator factor Nemf OS=Mus musculus GN=Nemf PE=1 SV=2	Zinc knuckle
BnaA03T0275000WE	-0.0923382	0.246871	-0.233753	0.0437218	-0.375337	0.0304346	-0.118733	0.145969	0.55543	0.0119212	-0.267305	0.0310939	putative glutaredoxin-like protein; K15216 RNA polymerase I-specific transcription initiation factor RRN3 (A)	Monothiol glutaredoxin-S17 OS=Arabidopsis thaliana GN=GRXS17 PE=1 SV=1	Thioredoxin
BnaA03T0280700WE	-0.579036	0.034457	-0.656872	0.06649	1.44651	0.0147446	-0.222071	0.247998	0.609391	0.0825559	0.591565	0.0345587	POPTRDRAFT_662518; hypothetical protein; K12126 phytochrome-interacting factor 3 (A)	Transcription factor UNE12 OS=Arabidopsis thaliana GN=UNE12 PE=2 SV=2	Helix-loop-helix DNA-binding domain
BnaA03T0305600WE	-0.728077	0.101702	0.86773	0.00949052	-0.200782	0.218551	0.140607	0.250524	-0.170488	0.331429	0.262009	0.0544204	protein CLP1 homolog; K14399 polyribonucleotide 5'-hydroxyl-kinase [EC:2.7.1.78] (A)	Protein CLP1 homolog OS=Arabidopsis thaliana GN=CLPS3 PE=1 SV=1	Molybdopterin guanine dinucleotide synthesis protein B
BnaA03T0313900WE	0.310742	0.0857515	0.112188	0.140923	0.361072	0.04704	0.591705	0.380806	0.0212318	0.233501	-0.336108	0.222135	bifunctional 3-dehydroquinate dehydratase/shikimate dehydrogenase, chloroplastic-like; K13832 3-dehydroquinate dehydratase / shikimate dehydrogenase [EC:4.2.1.10 1.1.1.25] (A)	Bifunctional 3-dehydroquinate dehydratase/shikimate dehydrogenase, chloroplastic OS=Arabidopsis thaliana GN=EMB3004 PE=1 SV=1	Shikimate dehydrogenase substrate binding domain
BnaA03T0315400WE	-1.03754	0.0349713	0.419233	0.353004	1.05	0.00955253	-0.930636	0.0541296	0.494891	0.352454	-0.176859	0.198438	serine/threonine-protein phosphatase 4 regulatory subunit 3-like; K17491 protein phosphatase 4 regulatory subunit 3 (A)	Serine/threonine-protein phosphatase 4 regulatory subunit 3 OS=Danio rerio GN=smek1 PE=1 SV=1	Component of IIS longevity pathway SMK-1
BnaA03T0316300WE	0.267796	0.146733	-0.361981	0.0438224	0.565452	0.00199766	-0.961825	0.215996	-0.681759	0.0963946	-0.509656	0.0259986	lipoamide acyltransferase component of branched-chain alpha-keto acid dehydrogenase complex, mitochondrial-like; K09699 2-oxoisovalerate dehydrogenase E2 component (dihydrolipoyl transacylase) [EC:2.3.1.168] (A)	Lipoamide acyltransferase component of branched-chain alpha-keto acid dehydrogenase complex, mitochondrial OS=Arabidopsis thaliana GN=BCE2 PE=1 SV=1	e3 binding domain
BnaA03T0327900WE	-0.560086	0.0388439	0.104976	0.154861	0.348661	0.0180794	-0.0654036	0.341566	-0.113841	0.259711	-0.0626387	0.379446	LIMR family protein At3g08930; K14617 LMBR1 domain-containing protein 1 (A)	LIMR family protein At3g08930 OS=Arabidopsis thaliana GN=At3g08930 PE=2 SV=2	LMBR1-like membrane protein
BnaA03T0328500WE	-0.339737	0.0113358	-0.704649	0.115301	0.301098	0.0232537	1.62542	0.128963	0.0825638	0.0188558	-0.284073	0.384732	regulatory-associated protein of TOR 1; K07204 regulatory associated protein of mTOR (A)	Regulatory-associated protein of TOR 1 OS=Arabidopsis thaliana GN=RAPTOR1 PE=1 SV=1	HEAT repeats
BnaA03T0358200WE	0.331216	0.176587	0.243944	0.219392	0.630854	0.0404606	-1.16964	0.027048	-0.822105	9.88728e-05	-0.113021	0.19726	disease resistance protein RPM1-like; K13457 disease resistance protein RPM1 (A)	PYK10-binding protein 2 OS=Arabidopsis thaliana GN=PBP2 PE=1 SV=1	Jacalin-like lectin domain
BnaA04T0020500WE	-0.0104966	0.0468437	-0.23656	0.218551	0.562064	0.0196427	-0.000518423	0.325722	-0.352889	0.213732	-0.352848	0.243572	pirin-1-like; K06911 uncharacterized protein (A)	Pirin-1 OS=Arabidopsis thaliana GN=PRN1 PE=1 SV=1	Pirin
BnaA04T0028800WE	0.0724609	0.114876	-0.297206	0.0301007	-0.582946	0.000752355	-0.0723278	0.124442	0.0182385	0.324537	-0.0197321	0.272935	eukaryotic translation initiation factor 3 subunit E-like; K03250 translation initiation factor 3 subunit E (A)	Eukaryotic translation initiation factor 3 subunit E OS=Nematostella vectensis GN=v1g163572 PE=3 SV=1	PCI domain
BnaA04T0033700WE	-3.82251	0.00515471	2.52513	0.082482	3.16917	0.0467442	-0.130653	0.295591	-2.26823	0.0289711	0.247844	0.331789	40S ribosomal protein S26-3-like; K02976 small subunit ribosomal protein S26e (A)	40S ribosomal protein S26-2 OS=Arabidopsis thaliana GN=RPS26B PE=2 SV=2	Ribosomal protein S26e
BnaA04T0090900WE	0.188769	0.21592	-0.432126	0.0873655	-0.104138	0.215459	-0.467577	0.11821	0.151027	0.0643909	0.573197	0.017648	pyridoxal kinase-like; K00868 pyridoxine kinase [EC:2.7.1.35] (A)	Pyridoxal kinase OS=Arabidopsis thaliana GN=PK PE=1 SV=2	Phosphomethylpyrimidine kinase
BnaA04T0145400WE	0.101958	0.197225	-0.0773988	0.315519	-0.706163	0.00115802	-0.465603	0.0377775	0.0837434	0.116722	-0.173014	0.0544717	polyadenylate-binding protein 4-like; K13126 polyadenylate-binding protein (A)	Polyadenylate-binding protein 4 OS=Arabidopsis thaliana GN=PAB4 PE=1 SV=1	Poly-adenylate binding protein, unique domain
BnaA04T0164300WE	0.360941	0.0537028	0.584	0.0186903	1.10496	0.0131963	-0.390707	0.0121211	-0.18038	0.0183404	0.84873	0.0270905	probable inactive receptor kinase At2g26730; K04730 interleukin-1 receptor-associated kinase 1 [EC:2.7.11.1] (A)	Probable inactive receptor kinase At2g26730 OS=Arabidopsis thaliana GN=At2g26730 PE=1 SV=1	Leucine rich repeat N-terminal domain
BnaA04T0208800WE	-0.196356	0.0713932	-0.810579	0.00264664	0.224678	0.0292204	-0.250503	0.128399	0.196142	0.109277	0.347089	0.111181	calcineurin subunit B; K06268 serine/threonine-protein phosphatase 2B regulatory subunit (A)	Calcineurin subunit B OS=Naegleria gruberi GN=CNB1 PE=3 SV=1	EF-hand domain pair
BnaA04T0212200WE	-0.0994351	0.243445	0.766267	0.00333992	2.62225	0.0117594	0.0690586	0.353539	0.0671436	0.307699	0.65877	0.0809619	cysteine desulfurase, mitochondrial precursor; K04487 cysteine desulfurase [EC:2.8.1.7] (A)	Tetrahydrocannabinolic acid synthase OS=Cannabis sativa PE=1 SV=1	Berberine and berberine like	nicotin related
BnaA04T0217700WE	-0.247086	0.0203215	0.0248041	0.311506	1.34122	0.0274139	0.318171	0.292614	0.392118	0.0456604	0.587071	0.0234703	serine carboxypeptidase-like 26; K16297 serine carboxypeptidase-like clade II [EC:3.4.16.-] (A)	Serine carboxypeptidase-like 26 OS=Arabidopsis thaliana GN=SCPL26 PE=2 SV=1	Serine carboxypeptidase
BnaA04T0221600WE	-0.142464	0.0669677	0.245412	0.121175	0.695381	0.00826144	-0.722004	0.0649854	0.0966261	0.377843	0.147912	0.153123	cell division protein FtsZ homolog 2-1, chloroplastic-like; K03531 cell division protein FtsZ (A)	Cell division protein FtsZ homolog 2-1, chloroplastic OS=Arabidopsis thaliana GN=FTSZ2-1 PE=1 SV=2	FtsZ family, C-terminal domain
BnaA04T0251300WE	-0.148965	0.0204561	0.281901	0.0224612	0.771159	0.00407005	0.131554	0.13223	0.154385	0.00595998	-0.0583572	0.229388	ferredoxin-dependent glutamate synthase 2, chloroplastic-like; K00284 glutamate synthase (ferredoxin) [EC:1.4.7.1] (A)	Ferredoxin-dependent glutamate synthase 2, chloroplastic OS=Arabidopsis thaliana GN=GLU2 PE=1 SV=2	GXGXG motif
BnaA04T0268600WE	-0.0330365	0.323379	-0.579681	0.000667096	-0.207541	0.0239192	-0.0704107	0.238214	-0.277331	0.0668391	-0.0766005	0.197633	citrate synthase 4, mitochondrial-like; K01647 citrate synthase [EC:2.3.3.1] (A)	Citrate synthase 4, mitochondrial OS=Arabidopsis thaliana GN=CSY4 PE=1 SV=3	Citrate synthase, C-terminal domain
BnaA05T0000100WE	0.828136	0.190203	1.50587	0.00313836	0.140279	0.343213	0.59092	0.378333	2.28565	0.00862747	1.00313	0.00765221	S-adenosylmethionine synthase 2; K00789 S-adenosylmethionine synthetase [EC:2.5.1.6] (A)	S-adenosylmethionine synthase 2 OS=Catharanthus roseus GN=SAMS2 PE=1 SV=1	S-adenosylmethionine synthetase, N-terminal domain
BnaA05T0015000WE	-0.233349	0.156086	0.860862	0.0943078	0.336298	0.0475883	0.668043	0.135599	-0.249677	0.0847295	0.252464	0.0298091	DEAD-box ATP-dependent RNA helicase 7-like; K16911 ATP-dependent RNA helicase DDX21 [EC:3.6.4.13] (A)	--	Embryo-specific protein 3, (ATS3)
BnaA05T0028400WE	-0.0732433	0.307871	-0.157678	0.289521	0.0403237	0.0197301	0.743174	0.178978	0.873603	0.00862495	-0.348368	0.195034	biotin synthase-like; K01012 biotin synthase [EC:2.8.1.6] (A)	Biotin synthase OS=Arabidopsis thaliana GN=BIO2 PE=2 SV=1	Radical SAM superfamily
BnaA05T0033100WE	1.02263	0.0695591	0.377405	0.103876	1.2938	0.0198486	1.13172	0.117789	-0.811363	0.222867	-0.355098	0.0121326	methylenetetrahydrofolate reductase 2-like; K00297 methylenetetrahydrofolate reductase (NADPH) [EC:1.5.1.20] (A)	Methylenetetrahydrofolate reductase 2 OS=Arabidopsis thaliana GN=MTHFR2 PE=1 SV=2	SET domain
BnaA05T0396500WE	-0.247757	0.0645281	0.496406	0.106361	1.59846	0.00655477	-0.691417	0.159955	-0.0786681	0.0916428	0.584136	0.0589171	TTLL2; tubulin tyrosine ligase-like family member 2; K16600 tubulin polyglutamylase TTLL2 [EC:6.-.-.-] (A)	UNC93-like protein 3 OS=Arabidopsis thaliana GN=At3g09470 PE=2 SV=1	Ion channel regulatory protein UNC-93
BnaA05T0400200WE	-0.415074	0.2926	0.244859	0.104719	-0.0152632	0.233455	0.0236653	0.327623	0.28896	0.0173671	-0.974583	0.0480036	importin subunit beta-1; K14293 importin subunit beta-1 (A)	Importin subunit beta-1 OS=Arabidopsis thaliana GN=KPNB1 PE=1 SV=1	Importin-beta N-terminal domain
BnaA05T0410200WE	-0.311079	0.244791	0.527564	0.0259557	0.716036	0.0264597	-0.417367	0.0469554	0.217364	0.234053	0.836103	0.00136821	hypothetical protein; K19891 glucan endo-1,3-beta-glucosidase 1/2/3 [EC:3.2.1.39] (A)	Probable glucan endo-1,3-beta-glucosidase A6 OS=Arabidopsis thaliana GN=A6 PE=2 SV=1	X8 domain
BnaA05T0413300WE	-0.252518	0.266126	0.0696312	0.205211	1.45281	0.0175885	0.0483278	0.357514	0.343083	0.29801	0.102311	0.155079	sterol 3-beta-glucosyltransferase UGT80A2; K05841 sterol 3beta-glucosyltransferase [EC:2.4.1.173] (A)	Sterol 3-beta-glucosyltransferase UGT80A2 OS=Arabidopsis thaliana GN=UGT80A2 PE=1 SV=1	UDP-glucoronosyl and UDP-glucosyl transferase
BnaA05T0418500WE	-0.23501	0.1897	-0.196156	0.00941847	-0.608183	0.0112402	-0.0276462	0.117911	0.420641	0.00477212	-0.036907	0.0354831	prolyl 4-hydroxylase 2; K00472 prolyl 4-hydroxylase [EC:1.14.11.2] (A)	Prolyl 4-hydroxylase 2 OS=Arabidopsis thaliana GN=P4H2 PE=1 SV=1	2OG-Fe(II) oxygenase superfamily
BnaA05T0433800WE	0.0181215	0.158608	0.536131	0.0188305	0.138434	0.0360332	-1.10442	0.0935325	-0.115204	0.27821	-0.189295	0.0263143	diphthine--ammonia ligase; K06927 diphthine-ammonia ligase [EC:6.3.1.14] (A)	Diphthine--ammonia ligase OS=Schizosaccharomyces pombe (strain 972 / ATCC 24843) GN=mug71 PE=1 SV=1	Endoribonuclease L-PSP
BnaA05T0439500WE	0.362928	0.0639696	-0.418269	0.0166361	-0.442227	0.029962	2.23827	0.264138	0.230485	0.201846	-0.802918	0.222504	glutathione S-transferase F11; K00799 glutathione S-transferase [EC:2.5.1.18] (A)	Glutathione S-transferase F11 OS=Arabidopsis thaliana GN=GSTF11 PE=2 SV=1	Glutathione S-transferase, C-terminal domain
BnaA05T0439900WE	0.203345	0.0241654	-0.437131	0.0260831	-0.72537	0.0084505	0.0115724	0.222775	0.157459	0.0199252	-0.269725	0.00130443	T-complex protein 1 subunit zeta; K09498 T-complex protein 1 subunit zeta (A)	T-complex protein 1 subunit zeta 1 OS=Arabidopsis thaliana GN=CCT6A PE=1 SV=1	TCP-1/cpn60 chaperonin family
BnaA05T0440800WE	0.480338	0.0916401	-0.735232	0.0261279	0.0176989	0.0295945	-0.580606	0.179355	0.489267	0.00733575	-0.24911	0.0477245	isopentenyl-diphosphate Delta-isomerase II, chloroplastic; K01823 isopentenyl-diphosphate delta-isomerase [EC:5.3.3.2] (A)	Isopentenyl-diphosphate Delta-isomerase II, chloroplastic OS=Arabidopsis thaliana GN=IPP2 PE=2 SV=1	NUDIX domain
BnaA05T0441700WE	0.0435145	0.291708	0.157672	0.283118	0.276951	0.00665085	-0.891792	0.114649	-0.165338	0.077462	-0.0450906	0.125292	inositol-phosphate phosphatase; K10047 inositol-phosphate phosphatase / L-galactose 1-phosphate phosphatase [EC:3.1.3.25 3.1.3.93] (A)	Inositol-phosphate phosphatase OS=Arabidopsis thaliana GN=VTC4 PE=1 SV=1	Inositol monophosphatase family
BnaA05T0441900WE	-0.628852	0.00923497	-0.339284	0.129309	0.0880575	0.343035	0.170214	0.252939	0.373015	0.113083	0.0349411	0.311087	pollen receptor-like kinase 2; K04730 interleukin-1 receptor-associated kinase 1 [EC:2.7.11.1] (A)	Probable inactive receptor kinase At3g02880 OS=Arabidopsis thaliana GN=At3g02880 PE=1 SV=1	Leucine rich repeat N-terminal domain
BnaA05T0443600WE	0.260111	0.102196	-0.249025	0.250368	1.02524	0.0495084	1.01927	0.16302	-0.503062	0.0189947	-0.0576945	0.342927	aspartyl protease family protein; K00924 [EC:2.7.1.-] (A)	Aspartic proteinase-like protein 2 OS=Arabidopsis thaliana GN=At1g65240 PE=1 SV=2	Eukaryotic aspartyl protease
BnaA06T0165500WE	-0.289679	0.277434	-0.363144	0.0411914	0.789163	0.0159064	-0.496201	0.0764977	-0.718331	0.00940856	0.010813	0.187446	--	--	NADH-ubiquinone reductase complex 1 MLRQ subunit
BnaA06T0287000WE	-0.554701	0.0870793	0.363672	0.126688	1.26999	0.0344642	-1.05727	0.113938	-0.19039	0.130787	-0.0983164	0.239877	serine/arginine-rich splicing factor SC35; K12891 splicing factor, arginine/serine-rich 2 (A)	Serine/arginine-rich splicing factor SC35 OS=Arabidopsis thaliana GN=SC35 PE=1 SV=1	RNA recognition motif. (a.k.a. RRM, RBD, or RNP domain)
BnaA06T0339700WE	-0.33419	0.0150606	0.492993	0.000338022	0.768766	0.00723028	-2.24023	0.194139	0.156134	0.149258	0.483823	0.0163449	2-oxoglutarate dehydrogenase, mitochondrial-like; K00164 2-oxoglutarate dehydrogenase E1 component [EC:1.2.4.2] (A)	2-oxoglutarate dehydrogenase, mitochondrial OS=Dictyostelium discoideum GN=ogdh PE=3 SV=1	Dehydrogenase E1 component
BnaA06T0416400WE	-0.083652	0.381682	-0.956896	0.00323872	1.72277	0.00290546	0.188465	0.358493	-0.541113	0.0626453	0.463264	0.0872501	--	Mavicyanin OS=Cucurbita pepo PE=1 SV=1	Plastocyanin-like domain
BnaA06T0435300WE	-0.176131	0.0270078	0.116127	0.193306	1.33454	0.00309522	-0.3748	0.0539317	0.0872968	0.264367	0.520497	0.020935	hypothetical protein; K14638 solute carrier family 15 (peptide/histidine transporter), member 3/4 (A)	Protein NRT1/ PTR FAMILY 8.3 OS=Arabidopsis thaliana GN=NPF8.3 PE=1 SV=1	POT family
BnaA06T0443700WE	-0.30984	0.0518746	0.14137	0.362988	0.708649	0.00636793	0.82378	0.0159169	0.0893715	0.339334	0.0332869	0.223696	farnesyl pyrophosphate synthase 1, mitochondrial; K00787 farnesyl diphosphate synthase [EC:2.5.1.1 2.5.1.10] (A)	Farnesyl pyrophosphate synthase 1, mitochondrial OS=Arabidopsis thaliana GN=FPS1 PE=2 SV=2	Polyprenyl synthetase
BnaA06T0472700WE	0.247337	0.0436926	-0.769525	0.0148442	-0.0823034	0.273903	-0.303923	0.038944	-0.117517	0.0399549	-0.283653	0.0181662	arginyl-tRNA--protein transferase 1; K00685 arginine-tRNA-protein transferase [EC:2.3.2.8] (A)	Thioredoxin-like protein Clot OS=Arabidopsis thaliana GN=At5g42850 PE=2 SV=1	Eukaryotic protein of unknown function (DUF953)
BnaA07T0221900WE	0.259993	0.0818542	-0.075008	0.167157	0.373923	0.0153991	-0.511912	0.00924973	0.0352874	0.201837	0.223155	0.0194411	isopentenyl-diphosphate Delta-isomerase I-like; K01823 isopentenyl-diphosphate delta-isomerase [EC:5.3.3.2] (A)	Nudix hydrolase 3 OS=Arabidopsis thaliana GN=NUDT3 PE=1 SV=1	Peptidase family M49
BnaA07T0222900WE	0.409292	0.190535	-0.349961	0.0820551	-1.27757	0.0367609	-0.624421	0.111914	1.30016	0.0629906	-0.157295	0.0984546	2-dehydro-3-deoxyphosphooctonate aldolase 1; K01627 2-dehydro-3-deoxyphosphooctonate aldolase (KDO 8-P synthase) [EC:2.5.1.55] (A)	2-dehydro-3-deoxyphosphooctonate aldolase 1 OS=Arabidopsis thaliana GN=KDSA1 PE=1 SV=2	DAHP synthetase I family
BnaA07T0251600WE	0.100487	0.364983	0.616765	0.007731	1.15223	0.0136964	0.182682	0.0470988	-0.0573041	0.331985	0.601189	0.0477322	sucrose synthase 6-like; K00695 sucrose synthase [EC:2.4.1.13] (A)	Sucrose synthase 6 OS=Arabidopsis thaliana GN=SUS6 PE=1 SV=1	Glycosyl transferases group 1
BnaA07T0261900WE	-0.135552	0.171888	0.00548032	0.250586	0.928822	0.00657678	0.37941	0.211441	0.259053	0.0542739	0.425553	0.0635168	probable peroxygenase 4; K17991 peroxygenase [EC:1.11.2.3] (A)	Probable peroxygenase 4 OS=Arabidopsis thaliana GN=PXG4 PE=1 SV=1	Caleosin related protein
BnaA07T0317700WE	0.0656742	0.29814	0.511907	0.0173082	1.70023	0.0119183	0.198579	0.0246314	0.24105	0.0573547	1.01213	0.0246105	laccase-15-like; K05909 laccase [EC:1.10.3.2] (A)	Multicopper oxidase LPR2 OS=Arabidopsis thaliana GN=LPR2 PE=2 SV=1	Multicopper oxidase
BnaA08T0047200WE	0.271838	0.0660386	-1.28846	0.0180583	-1.32598	0.00107387	-0.45569	0.110797	-0.0782129	0.155151	0.102331	0.235884	thioredoxin H5; K03671 thioredoxin 1 (A)	Thioredoxin H5 OS=Arabidopsis thaliana GN=TRX5 PE=1 SV=1	Thioredoxin
BnaA08T0098300WE	0.275412	0.0989405	-0.83766	0.00850191	-0.686806	0.00639795	-0.0975313	0.310172	-0.0227013	0.385045	-0.195231	0.0291326	probable H/ACA ribonucleoprotein complex subunit 1; K13199 plasminogen activator inhibitor 1 RNA-binding protein (A)	--	Stm1
BnaA08T0098400WE	-0.020632	0.381474	0.319354	0.115329	0.557133	0.00671896	-0.890487	0.0828629	0.16045	0.182236	-0.0637074	0.352101	ras-related protein RABD2c; K07874 Ras-related protein Rab-1A (A)	Ras-related protein RABD2c OS=Arabidopsis thaliana GN=RABD2C PE=2 SV=1	Ras family
BnaA08T0162900WE	-0.397539	0.20835	2.83685	0.0224238	1.70073	0.00890383	-0.040025	0.36227	0.745907	0.00376976	-0.564799	0.0943769	--	Cation/H(+) antiporter 17 OS=Arabidopsis thaliana GN=CHX17 PE=1 SV=1	Sodium/hydrogen exchanger family
BnaA08T0168200WE	0.238408	0.0320932	0.168565	0.334247	-1.0284	0.024168	-1.77793	0.0761887	-1.0321	0.00208821	0.174012	0.348734	cytochrome P450 81F1-like; K00517 [EC:1.14.-.-] (A)	Cytochrome P450 81F1 OS=Arabidopsis thaliana GN=CYP81F1 PE=2 SV=2	Cytochrome P450
BnaA08T0174400WE	-0.113515	0.0462403	-0.581977	0.0166609	0.0055779	0.352314	0.0051901	0.293651	0.0784953	0.150408	0.262707	0.0602649	MICOS complex subunit MIC60-like; K17785 mitofilin (A)	MICOS complex subunit mic60 OS=Neurospora crassa (strain ATCC 24698 / 74-OR23-1A / CBS 708.71 / DSM 1257 / FGSC 987) GN=mic60 PE=3 SV=1	Mitochondrial inner membrane protein
BnaA08T0174500WE	0.491402	0.0454454	-0.35414	0.136415	1.06262	0.00946864	-0.526987	0.0799497	0.0345654	0.323917	-0.154466	0.325022	apoptotic chromatin condensation inducer in the nucleus-like; K12875 apoptotic chromatin condensation inducer in the nucleus (A)	Apoptotic chromatin condensation inducer in the nucleus OS=Homo sapiens GN=ACIN1 PE=1 SV=2	SAP domain
BnaA08T0176500WE	0.426618	0.0053048	0.148902	0.35861	-0.608995	0.0639545	1.722	0.340332	0.85848	0.024792	0.421264	0.144236	leucoanthocyanidin reductase-like; K13081 leucoanthocyanidin reductase [EC:1.17.1.3] (A)	Isoflavone reductase homolog OS=Solanum tuberosum PE=2 SV=1	NmrA-like family
BnaA08T0182400WE	-0.314909	0.0927929	-0.587082	0.0622857	-0.33306	0.0756046	0.30253	0.233	0.253586	0.0274307	-0.163288	0.0529141	heterogeneous nuclear ribonucleoprotein 1-like; K14411 RNA-binding protein Musashi (A)	Heterogeneous nuclear ribonucleoprotein 1 OS=Arabidopsis thaliana GN=RNP1 PE=1 SV=1	RNA recognition motif. (a.k.a. RRM, RBD, or RNP domain)
BnaA08T0185000WE	-0.13295	0.0725625	-0.74319	0.00423486	-0.912606	0.00017539	-0.192279	0.215517	-0.0245167	0.331776	-0.0216936	0.357533	elongation factor 1-delta 1-like; K03232 elongation factor 1-beta (A)	Elongation factor 1-delta 2 OS=Arabidopsis thaliana GN=At2g18110 PE=1 SV=1	EF-1 guanine nucleotide exchange domain
BnaA08T0195300WE	-0.166192	0.0868965	-0.0420537	0.381722	0.662813	0.0288786	0.147132	0.16929	0.193219	0.0474488	0.235904	0.0760314	uncharacterized LOC100792815; K03868 RING-box protein 1 (A)	GEM-like protein 1 OS=Arabidopsis thaliana GN=FIP1 PE=1 SV=1	GRAM domain
BnaA08T0236800WE	-1.70325	0.0927526	-0.716024	0.179849	0.0508595	0.369625	-0.0246899	0.196484	-1.50102	0.0313762	-0.13989	0.263402	--	Miraculin OS=Synsepalum dulcificum PE=1 SV=3	Trypsin and protease inhibitor
BnaA08T0267900WE	-0.0539718	0.191915	-0.321721	0.160794	-0.394698	0.0933129	-0.412423	0.16465	0.185001	0.132641	-0.682811	0.0324508	UPF0202 protein At1g10490; K14521 N-acetyltransferase 10 [EC:2.3.1.-] (A)	UPF0202 protein At1g10490 OS=Arabidopsis thaliana GN=At1g10490 PE=2 SV=2	Possible tRNA binding domain
BnaA08T0284200WE	0.416355	0.125038	-0.709125	0.00759206	-1.07337	0.00540492	-0.38263	0.121725	-0.0299866	0.0233814	0.450373	0.0882835	ran-binding protein 1 homolog a-like; K15306 Ran-binding protein 1 (A)	Ran-binding protein 1 homolog a OS=Arabidopsis thaliana GN=RANBP1A PE=1 SV=1	RanBP1 domain
BnaA09T0049800WE	-0.289514	0.0189298	-0.9648	0.0492713	0.886125	0.174445	0.65387	0.210705	-0.180117	0.121092	0.90103	0.167597	probable histone H2A.5; K11251 histone H2A (A)	Probable histone H2A.5 OS=Arabidopsis thaliana GN=At5g27670 PE=1 SV=1	Core histone H2A/H2B/H3/H4
BnaA09T0050000WE	0.0131055	0.310347	2.00425	0.0181142	1.25287	0.0306376	0.147289	0.110549	0.0741986	0.130624	0.805125	0.0386881	--	Protein RALF-like 22 OS=Arabidopsis thaliana GN=RALFL22 PE=3 SV=1	Rapid ALkalinization Factor (RALF)
BnaA09T0078700WE	0.0299456	0.323202	-0.125985	0.294194	-0.569843	0.0216707	0.32714	0.185461	-0.253849	0.0623756	-0.484749	0.0130313	bifunctional riboflavin biosynthesis protein RIBA 1, chloroplastic-like; K14652 3,4-dihydroxy 2-butanone 4-phosphate synthase / GTP cyclohydrolase II [EC:4.1.99.12 3.5.4.25] (A)	Bifunctional riboflavin biosynthesis protein RIBA 1, chloroplastic OS=Arabidopsis thaliana GN=RIBA1 PE=1 SV=2	GTP cyclohydrolase II
BnaA09T0078900WE	-0.45226	0.0299844	0.161725	0.151423	0.347227	0.00439409	-0.682804	0.107227	0.535842	0.19721	-1.06137	0.0627809	beta-ureidopropionase-like; K01431 beta-ureidopropionase [EC:3.5.1.6] (A)	Beta-ureidopropionase OS=Arabidopsis thaliana GN=PYD3 PE=1 SV=1	Carbon-nitrogen hydrolase
BnaA09T0081900WE	-0.359359	0.0547168	0.165382	0.348523	0.353316	0.0776476	-0.719498	0.119522	-0.659774	0.0119533	0.140246	0.253274	ras-related protein RABA4a; K07904 Ras-related protein Rab-11A (A)	Ras-related protein RABA4a OS=Arabidopsis thaliana GN=RABA4A PE=1 SV=1	Ras family
BnaA09T0088600WE	-0.53783	0.105751	0.295881	0.0213168	0.959676	0.0207352	-0.00952813	0.257841	-0.282737	0.0299874	0.353562	0.0836953	L-ascorbate oxidase homolog; K19791 iron transport multicopper oxidase (A)	L-ascorbate oxidase homolog OS=Nicotiana tabacum PE=2 SV=1	Multicopper oxidase
BnaA09T0129500WE	-0.676004	0.127316	0.414582	0.111307	0.490868	0.164401	-0.526142	0.00290427	-0.580937	0.00343676	-0.255374	0.0395618	endoglucanase 24-like; K01179 endoglucanase [EC:3.2.1.4] (A)	Endoglucanase 6 OS=Arabidopsis thaliana GN=At1g64390 PE=2 SV=2	Carbohydrate binding domain CBM49
BnaA09T0134800WE	0.281456	0.0407188	0.0593143	0.2709	1.11216	0.00497699	-0.555635	0.101932	-0.0577507	0.0688215	-0.0544937	0.204583	V-type proton ATPase subunit E3-like; K02150 V-type H+-transporting ATPase subunit E (A)	V-type proton ATPase subunit E3 OS=Arabidopsis thaliana GN=VHA-E3 PE=2 SV=1	ATP synthase (E/31 kDa) subunit
BnaA09T0188200WE	-0.0543501	0.309008	-0.535113	0.00544085	-0.512152	0.00308245	0.496273	0.0418054	-0.503788	0.0139209	0.279836	0.0259703	Bc-NDPK1; nucleoside diphosphate kinase 1-like; K00940 nucleoside-diphosphate kinase [EC:2.7.4.6] (A)	Nucleoside diphosphate kinase 1 OS=Arabidopsis thaliana GN=NDK1 PE=1 SV=1	Nucleoside diphosphate kinase
BnaA09T0240900WE	-0.0424685	0.365732	-0.0840651	0.262383	0.179146	0.0460935	0.96865	0.00591053	-0.00946199	0.298634	0.00218991	0.159462	Bc-NDPK3; nucleoside diphosphate kinase III, chloroplastic/mitochondrial; K00940 nucleoside-diphosphate kinase [EC:2.7.4.6] (A)	Nucleoside diphosphate kinase III, chloroplastic/mitochondrial OS=Arabidopsis thaliana GN=NDPK3 PE=1 SV=1	Nucleoside diphosphate kinase
BnaA09T0374500WE	0.314852	0.0821677	-0.310145	0.195788	0.172736	0.294374	-0.53662	0.0808008	0.455304	0.0149723	-0.0698005	0.352966	nid1, nidogen-1; nidogen 1; K06826 nidogen (entactin) (A)	Vacuolar-sorting receptor 6 OS=Arabidopsis thaliana GN=VSR6 PE=2 SV=3	PA domain
BnaA09T0486800WE	-0.162903	0.313905	-0.330682	0.233062	1.08694	0.032418	-0.51221	0.121152	0.147258	0.125446	-0.150481	0.220423	ferritin-1; K00522 ferritin heavy chain [EC:1.16.3.2] (A)	Ferritin-3, chloroplastic OS=Arabidopsis thaliana GN=FER3 PE=2 SV=1	Ferritin-like domain
BnaA10T0049500WE	-0.31552	0.0571424	0.223325	0.24415	1.33653	0.0294087	0.49208	0.00734616	-0.233987	0.102608	0.301747	0.153447	histone H1.1-like; K11275 histone H1/5 (A)	Histone H1.2 OS=Arabidopsis thaliana GN=At2g30620 PE=1 SV=1	linker histone H1 and H5 family
BnaA10T0070900WE	0.309775	0.0560798	-0.00519829	0.38818	0.756054	0.00371313	-0.294875	0.18569	-0.809569	0.0079133	-0.00626618	0.0371819	manganese-dependent ADP-ribose/CDP-alcohol diphosphatase; K01517 manganese-dependent ADP-ribose/CDP-alcohol diphosphatase [EC:3.6.1.13 3.6.1.16 3.6.1.53] (A)	High-affinity nitrate transporter 3.1 OS=Arabidopsis thaliana GN=NRT3.1 PE=1 SV=1	--
BnaA10T0111100WE	-0.393551	0.0580774	-0.165094	0.212569	1.21076	0.0219638	-0.414332	0.0274486	0.0169678	0.296078	0.362493	0.11399	POPTRDRAFT_753230; glycerophosphoryl diester phosphodiesterase family protein; K01126 glycerophosphoryl diester phosphodiesterase [EC:3.1.4.46] (A)	Glycerophosphodiester phosphodiesterase GDPDL4 OS=Arabidopsis thaliana GN=GDPDL4 PE=1 SV=1	Glycerophosphoryl diester phosphodiesterase family
BnaA10T0143800WE	-0.0982072	0.310742	-0.680867	0.027888	0.707811	0.0130325	-1.51112	0.0598667	0.51509	0.116186	-0.181291	0.230034	--	--	--
BnaA10T0176200WE	0.0110618	0.31812	-0.295638	0.244822	-1.13237	0.0242921	0.0678283	0.0671538	0.0588081	0.27382	-0.329262	0.00639655	aspartate aminotransferase, cytoplasmic isozyme 1-like; K14454 aspartate aminotransferase, cytoplasmic [EC:2.6.1.1] (A)	Aspartate aminotransferase, cytoplasmic isozyme 1 OS=Arabidopsis thaliana GN=ASP2 PE=1 SV=2	Aminotransferase class I and II
BnaA10T0189800WE	-1.14637	0.149709	0.038306	0.111118	-0.270332	0.0163041	0.0675694	0.250267	0.171363	0.253219	0.240786	0.255843	hypothetical protein; K05527 BolA protein (A)	Protein BOLA4, chloroplastic/mitochondrial OS=Arabidopsis thaliana GN=BOLA4 PE=1 SV=1	BolA-like protein
BnaC01T0010400WE	-0.039393	0.327712	0.277119	0.0209975	1.5201	0.00705284	-0.651394	0.0674189	0.242944	0.277514	0.577121	0.0299179	DNA-directed RNA polymerase II subunit 1-like; K03006 DNA-directed RNA polymerase II subunit RPB1 [EC:2.7.7.6] (A)	DNA-directed RNA polymerase II subunit rpb1 OS=Dictyostelium discoideum GN=polr2a PE=2 SV=2	Phospholipase D Active site motif
BnaC01T0014800WE	0.0273708	0.110888	0.413359	0.017928	1.14499	0.00503495	-1.1276	0.105985	0.26081	0.080485	0.329652	0.0307938	probable serine/threonine-protein kinase At4g35230; K14500 BR-signaling kinase [EC:2.7.11.1] (A)	Probable serine/threonine-protein kinase At4g35230 OS=Arabidopsis thaliana GN=At4g35230 PE=1 SV=1	TPR repeat
BnaC01T0020000WE	0.098458	0.131143	0.160113	0.150029	-0.156569	0.0115258	-0.555586	0.00515429	-0.159739	0.0208232	-0.274771	0.0104709	40S ribosomal protein S3a-2-like; K02984 small subunit ribosomal protein S3Ae (A)	40S ribosomal protein S3a-2 OS=Arabidopsis thaliana GN=RPS3AB PE=2 SV=3	Ribosomal S3Ae family
BnaC01T0021600WE	-0.238399	0.0403009	0.116554	0.052983	0.528551	0.0236407	0.0774677	0.332472	0.300961	0.0760023	0.290188	0.060508	guanine nucleotide-binding protein subunit beta; K04536 guanine nucleotide-binding protein G(I)/G(S)/G(T) subunit beta-1 (A)	Glucan endo-1,3-beta-glucosidase 7 OS=Arabidopsis thaliana GN=At4g34480 PE=1 SV=2	X8 domain
BnaC01T0023200WE	-0.169979	0.327416	0.452027	0.112108	-0.800641	0.0115273	-0.375816	0.147186	0.359933	0.0814612	0.450581	0.109076	queuine tRNA-ribosyltransferase (predicted) (EC:2.4.2.29); K00773 queuine tRNA-ribosyltransferase [EC:2.4.2.29] (A)	Thioredoxin domain-containing protein 9 homolog OS=Arabidopsis thaliana GN=At2g18990 PE=2 SV=1	Phosducin
BnaC01T0029300WE	0.682368	0.376095	0.280416	0.011315	1.08957	0.00733589	0.154636	0.210864	-0.0509913	0.33261	-0.0404618	0.243022	phospho-2-dehydro-3-deoxyheptonate aldolase 2, chloroplastic; K01626 3-deoxy-7-phosphoheptulonate synthase [EC:2.5.1.54] (A)	Phospho-2-dehydro-3-deoxyheptonate aldolase 2, chloroplastic OS=Arabidopsis thaliana GN=DHS2 PE=2 SV=2	Class-II DAHP synthetase family
BnaC01T0031500WE	0.123802	0.0351933	-0.893156	0.00260694	-0.646454	0.00334722	0.0413434	0.21912	-0.0963869	0.12332	-0.123096	0.113627	eukaryotic translation initiation factor 3 subunit K-like; K15028 translation initiation factor 3 subunit K (A)	Eukaryotic translation initiation factor 3 subunit K OS=Arabidopsis thaliana GN=TIF3K1 PE=2 SV=1	SAC3/GANP family
BnaC01T0033200WE	0.00346315	0.0731435	0.484066	0.106081	0.740942	0.0210582	-0.17553	0.329076	-0.0447136	0.206362	-0.17878	0.269571	(S)-coclaurine N-methyltransferase; K13384 (S)-coclaurine N-methyltransferase [EC:2.1.1.140] (A)	(S)-coclaurine N-methyltransferase OS=Thalictrum flavum subsp. glaucum PE=1 SV=1	Mycolic acid cyclopropane synthetase
BnaC01T0034100WE	0.117908	0.0338207	0.212675	0.079842	0.757649	0.0162589	0.126308	0.0881542	0.139931	0.122051	0.386505	0.0419934	glycine dehydrogenase (decarboxylating) 1, mitochondrial; K00281 glycine dehydrogenase [EC:1.4.4.2] (A)	Glycine dehydrogenase (decarboxylating) 1, mitochondrial OS=Arabidopsis thaliana GN=GLDP1 PE=1 SV=2	Glycine cleavage system P-protein
BnaC01T0035000WE	-0.185133	0.150421	0.331452	0.160758	2.54039	0.00769144	0.366772	0.157095	1.09061	0.0612698	1.20201	0.0409165	vacuolar-processing enzyme gamma-isozyme; K01369 legumain [EC:3.4.22.34] (A)	Vacuolar-processing enzyme gamma-isozyme OS=Arabidopsis thaliana GN=At4g32940 PE=2 SV=2	Peptidase C13 family
BnaC01T0037600WE	0.0758828	0.204876	-0.0165777	0.364884	-0.810678	0.0130463	-0.0477155	0.34704	0.0202355	0.324754	-0.630207	0.00801798	ATP-dependent 6-phosphofructokinase 6; K00850 6-phosphofructokinase 1 [EC:2.7.1.11] (A)	ATP-dependent 6-phosphofructokinase 6 OS=Arabidopsis thaliana GN=PFK6 PE=1 SV=1	Phosphofructokinase
BnaC01T0038900WE	2.44276	0.243047	-0.299111	0.270305	-0.22015	0.00802902	-2.53726	0.238894	-0.0260305	0.115047	-0.205956	0.225218	helicase and polymerase-containing protein TEBICHI; K02349 DNA polymerase theta [EC:2.7.7.7] (A)	Helicase and polymerase-containing protein TEBICHI OS=Arabidopsis thaliana GN=TEB PE=2 SV=1	Helicase conserved C-terminal domain
BnaC01T0060800WE	0.0999288	0.328797	0.531253	0.0668215	0.995436	0.00280057	-0.748273	0.060797	-0.705752	0.129578	0.62008	0.0842606	peptidase, putative (EC:3.4.21.25); K18443 golgi-specific brefeldin A-resistance guanine nucleotide exchange factor 1 (A)	Subtilisin-like protease SBT2.5 OS=Arabidopsis thaliana GN=SBT2.5 PE=2 SV=1	PA domain
BnaC01T0066800WE	0.0180786	0.313828	0.265338	0.124169	-1.0794	0.0110239	-0.316407	0.336212	0.523801	0.0485011	0.136993	0.219124	40S ribosomal protein S15a-5; K02957 small subunit ribosomal protein S15Ae (A)	40S ribosomal protein S15a-5 OS=Arabidopsis thaliana GN=RPS15AE PE=2 SV=1	Ribosomal protein S8
BnaC01T0068700WE	-0.475604	0.0153157	0.0658281	0.317078	0.331784	0.250783	0.701574	0.0544622	0.00268783	0.0568236	-0.565524	0.0365568	ATP-dependent 6-phosphofructokinase 1-like; K00850 6-phosphofructokinase 1 [EC:2.7.1.11] (A)	ATP-dependent 6-phosphofructokinase 1 OS=Arabidopsis thaliana GN=PFK1 PE=1 SV=1	Phosphofructokinase
BnaC01T0353400WE	0.158043	0.254682	-0.542562	0.0132824	-0.819817	0.000832432	-0.456943	0.0475138	-0.260375	0.0122233	-0.0176653	0.369208	--	Translationally-controlled tumor protein homolog OS=Brassica oleracea GN=TCTP PE=2 SV=1	Translationally controlled tumour protein
BnaC01T0373000WE	-0.0229144	0.19687	0.0725432	0.29504	0.769879	0.00667626	-0.216906	0.0428049	0.0565014	0.247096	0.0952664	0.222886	peptidase, putative (EC:3.4.21.25); K18443 golgi-specific brefeldin A-resistance guanine nucleotide exchange factor 1 (A)	Subtilisin-like protease SBT1.7 OS=Arabidopsis thaliana GN=SBT1.7 PE=1 SV=1	PA domain
BnaC01T0386900WE	-0.0968559	0.0216864	-0.0483788	0.17179	0.917553	0.0243452	-0.306729	0.103422	0.00316594	0.133933	0.601348	0.0523698	probable mediator of RNA polymerase II transcription subunit 37c; K03283 heat shock 70kDa protein 1/8 (A)	Probable mediator of RNA polymerase II transcription subunit 37c OS=Arabidopsis thaliana GN=MED37C PE=1 SV=1	Hsp70 protein
BnaC01T0389700WE	-0.0357284	0.384976	-0.507462	0.0402057	-0.510417	0.0314701	-0.477099	0.0142525	0.129441	0.207112	-0.0359704	0.32821	GRMZM2G129493, GRMZM2G362362; uncharacterized LOC103648573; K01188 beta-glucosidase [EC:3.2.1.21] (A)	Polygalacturonase inhibitor 1 OS=Arabidopsis thaliana GN=PGIP1 PE=2 SV=1	Leucine Rich repeat
BnaC02T0001700WE	-0.362359	0.020546	-0.577792	0.00174898	-0.0193075	0.349252	-0.149044	0.0165395	-0.0126687	0.301524	-0.221331	0.0186553	glutathione S-transferase L3-like; K00799 glutathione S-transferase [EC:2.5.1.18] (A)	Glutathione S-transferase L3 OS=Arabidopsis thaliana GN=GSTL3 PE=2 SV=1	Glutathione S-transferase, C-terminal domain
BnaC02T0308500WE	-0.116005	0.0960161	-0.0619754	0.281608	-0.270517	0.0211785	-0.619736	0.0562957	-0.129186	0.0755311	-0.0363668	0.096719	phosphoglycerate kinase, cytosolic-like; K00927 phosphoglycerate kinase [EC:2.7.2.3] (A)	Phosphoglycerate kinase, cytosolic OS=Nicotiana tabacum PE=2 SV=1	Phosphoglycerate kinase
BnaC03T0005200WE	0.13115	0.133848	-0.250403	0.180387	-0.687212	0.0255519	-0.605896	0.0295921	-0.487527	0.0514427	-0.31815	0.0866327	uncharacterized LOC103856014; K00616 transaldolase [EC:2.2.1.2] (A)	Transaldolase 2 OS=Streptomyces avermitilis (strain ATCC 31267 / DSM 46492 / JCM 5070 / NCIMB 12804 / NRRL 8165 / MA-4680) GN=tal2 PE=3 SV=1	Transaldolase
BnaC03T0083500WE	-0.25159	0.106421	-0.103322	0.149834	-0.704204	0.00773505	-0.760847	0.0160923	0.416994	0.0342611	0.383047	0.288031	dihydrolipoyllysine-residue succinyltransferase component of 2-oxoglutarate dehydrogenase complex 1, mitochondrial-like; K00658 2-oxoglutarate dehydrogenase E2 component (dihydrolipoamide succinyltransferase) [EC:2.3.1.61] (A)	Dihydrolipoyllysine-residue succinyltransferase component of 2-oxoglutarate dehydrogenase complex 1, mitochondrial OS=Arabidopsis thaliana GN=At5g55070 PE=2 SV=1	Biotin-requiring enzyme
BnaC03T0086700WE	-0.125609	0.224204	-0.684509	0.00311957	0.666696	0.0351345	-0.403199	0.257837	0.424454	0.106131	-0.205585	0.139945	NAD(P)H dehydrogenase (quinone) FQR1-like; K03809 NAD(P)H dehydrogenase (quinone) [EC:1.6.5.2] (A)	NAD(P)H dehydrogenase (quinone) FQR1 OS=Arabidopsis thaliana GN=FQR1 PE=1 SV=1	NADPH-dependent FMN reductase
BnaC03T0108800WE	-1.10876	0.00514882	0.430397	0.137192	0.671156	0.02004	0.290946	0.0758682	0.261726	0.120779	0.572917	0.0489392	malonyl CoA-acyl carrier protein transacylase-like; K00645 [acyl-carrier-protein] S-malonyltransferase [EC:2.3.1.39] (A)	Malonyl-CoA-acyl carrier protein transacylase, mitochondrial OS=Mus musculus GN=Mcat PE=1 SV=3	Acyl transferase domain
BnaC03T0238900WE	0.159045	0.250059	0.0912245	0.34848	1.27786	0.0118133	-1.33241	0.0605601	0.684209	0.0133603	-0.344535	0.0919643	tetratricopeptide repeat domain containing protein; K19360 nephrocystin-3 (A)	Nephrocystin-3 OS=Xenopus laevis GN=nphp3 PE=2 SV=1	Tetratricopeptide repeat
BnaC03T0296100WE	-0.155932	0.158644	-0.574615	0.00493664	-0.830274	0.00451762	0.32119	0.0245718	0.129351	0.0835939	-0.217888	0.135067	prolyl 4-hydroxylase 2; K00472 prolyl 4-hydroxylase [EC:1.14.11.2] (A)	Prolyl 4-hydroxylase 2 OS=Arabidopsis thaliana GN=P4H2 PE=1 SV=1	2OG-Fe(II) oxygenase superfamily
BnaC03T0307500WE	0.363879	0.0182557	-0.128135	0.35825	1.65709	0.00977554	-0.106868	0.296321	0.278539	0.152031	0.926527	0.0288717	ankyrin repeat domain-containing protein 30A-like; K19748 RAB6-interacting golgin (A)	--	Transcriptional activator
BnaC03T0314900WE	-0.258424	0.0433425	0.202678	0.0826948	1.11355	0.0011901	-0.0955361	0.151591	0.258049	0.127735	0.45628	0.0843081	serine carboxypeptidase-like 49; K16298 serine carboxypeptidase-like clade IV [EC:3.4.16.-] (A)	Serine carboxypeptidase-like 49 OS=Arabidopsis thaliana GN=SCPL49 PE=2 SV=2	Serine carboxypeptidase
BnaC03T0315800WE	0.907965	0.0259879	-0.393806	0.176506	-1.38347	0.00679313	-0.527493	0.0528237	-0.151728	0.143231	0.674824	0.0545354	sulfite reductase [ferredoxin], chloroplastic-like; K00392 sulfite reductase (ferredoxin) [EC:1.8.7.1] (A)	Sulfite reductase [ferredoxin], chloroplastic OS=Arabidopsis thaliana GN=SIR PE=1 SV=1	Nitrite/Sulfite reductase ferredoxin-like half domain
BnaC03T0381100WE	-0.921692	0.0156017	1.05698	0.0241533	0.485039	0.136898	-0.00159053	0.322347	0.883712	0.126055	0.0722518	0.321678	anthocyanidin 3-O-glucosyltransferase 2; K08237 hydroquinone glucosyltransferase [EC:2.4.1.218] (A)	UDP-glycosyltransferase 71B7 OS=Arabidopsis thaliana GN=UGT71B7 PE=2 SV=2	UDP-glucoronosyl and UDP-glucosyl transferase
BnaC03T0469400WE	0.373882	0.136198	-0.555097	0.0314664	-0.394465	0.0360513	-0.0142779	0.341541	0.124736	0.252863	-0.0509338	0.362523	adenylate kinase 4-like; K00939 adenylate kinase [EC:2.7.4.3] (A)	Adenylate kinase 4 OS=Arabidopsis thaliana GN=ADK1 PE=1 SV=2	Adenylate kinase, active site lid
BnaC04T0080000WE	-0.0656721	0.132653	-0.105278	0.106102	-0.0341054	0.203607	0.0358724	0.0502285	0.545594	0.00368895	0.33691	0.0641679	intron-binding protein aquarius-like; K12874 intron-binding protein aquarius (A)	Intron-binding protein aquarius OS=Homo sapiens GN=AQR PE=1 SV=4	AAA domain
BnaC05T0484000WE	-0.0714336	0.287278	0.435802	0.0356038	1.63401	0.0120188	-0.700627	0.175634	0.55788	0.172218	1.0125	0.0180878	phenylalanine ammonia-lyase 4-like; K10775 phenylalanine ammonia-lyase [EC:4.3.1.24] (A)	Phenylalanine ammonia-lyase 4 OS=Arabidopsis thaliana GN=PAL4 PE=1 SV=1	Aromatic amino acid lyase
BnaC05T0497100WE	-0.128657	0.0505868	-0.799529	0.0555106	0.586833	0.000824994	-0.702198	0.11822	0.148666	0.0958912	-0.252798	0.177965	hypothetical protein; K14945 protein quaking (A)	Protein RETICULATA-RELATED 2 OS=Arabidopsis thaliana GN=RER2 PE=2 SV=1	Domain of unknown function (DUF3411)
BnaC05T0497500WE	-0.0333899	0.240724	0.0454335	0.298475	0.694548	0.00516245	-0.144195	0.0731842	0.0450509	0.349302	0.392417	0.00751764	probable 2,3-bisphosphoglycerate-independent phosphoglycerate mutase 2; K15633 2,3-bisphosphoglycerate-independent phosphoglycerate mutase [EC:5.4.2.12] (A)	Probable 2,3-bisphosphoglycerate-independent phosphoglycerate mutase 2 OS=Arabidopsis thaliana GN=At3g08590 PE=1 SV=1	BPG-independent PGAM N-terminus (iPGM_N)
BnaC05T0500800WE	-0.439931	0.0512687	-0.0398993	0.233606	-0.695886	0.00461911	0.247336	0.115448	0.413088	0.0173459	-0.497442	0.00341501	tRNA wybutosine-synthesizing protein 2/3/4; K15450 tRNA wybutosine-synthesizing protein 3 [EC:2.1.1.282] (A)	Nitrile-specifier protein 5 OS=Arabidopsis thaliana GN=NSP5 PE=2 SV=1	Kelch motif
BnaC05T0504400WE	-0.46777	0.0485387	-0.123064	0.365619	0.760308	0.0193207	-0.649545	0.0800618	-0.313984	0.00521353	0.287717	0.0546534	hypothetical protein; K19891 glucan endo-1,3-beta-glucosidase 1/2/3 [EC:3.2.1.39] (A)	Probable glucan endo-1,3-beta-glucosidase A6 OS=Arabidopsis thaliana GN=A6 PE=2 SV=1	X8 domain
BnaC05T0506300WE	-0.00274473	0.262122	0.0596759	0.186119	0.827599	0.00461456	-0.324299	0.0795256	0.202029	0.109989	0.201307	0.0550401	callose synthase 9-like; K11000 callose synthase [EC:2.4.1.-] (A)	Callose synthase 9 OS=Arabidopsis thaliana GN=CALS9 PE=2 SV=2	1,3-beta-glucan synthase subunit FKS1, domain-1
BnaC05T0510100WE	0.281479	0.0660596	-0.479619	0.188716	-0.88718	0.0164309	0.0324531	0.156286	0.253081	0.143544	-0.188482	0.130349	peptidyl-prolyl cis-trans isomerase CYP21-4-like; K12736 peptidylprolyl isomerase domain and WD repeat-containing protein 1 [EC:5.2.1.8] (A)	Peptidyl-prolyl cis-trans isomerase CYP21-4 OS=Arabidopsis thaliana GN=CYP21-4 PE=2 SV=1	Cyclophilin type peptidyl-prolyl cis-trans isomerase/CLD
BnaC05T0512300WE	-0.0913845	0.0638395	0.197212	0.0364118	0.633675	0.0236198	0.0340486	0.297015	-0.0145098	0.352518	0.346454	0.0209721	putative chromatin-remodeling complex ATPase chain; K11654 SWI/SNF-related matrix-associated actin-dependent regulator of chromatin subfamily A member 5 [EC:3.6.4.-] (A)	Putative chromatin-remodeling complex ATPase chain OS=Arabidopsis thaliana GN=At3g06400 PE=2 SV=3	DNA-binding domain
BnaC05T0535300WE	0.213074	0.0303704	0.0184712	0.239242	1.17738	0.0161414	-0.577147	0.080039	0.20975	0.358687	0.0635292	0.178482	adenylyl-sulfate kinase 3; K00860 adenylylsulfate kinase [EC:2.7.1.25] (A)	Adenylyl-sulfate kinase 3 OS=Arabidopsis thaliana GN=APK3 PE=1 SV=1	Adenylylsulphate kinase
BnaC05T0539300WE	0.184634	0.0322679	0.402494	0.0192212	0.924921	0.0165033	0.069068	0.114654	-0.000433468	0.280031	0.528074	0.0513279	non-specific phospholipase C3; K01114 phospholipase C [EC:3.1.4.3] (A)	Non-specific phospholipase C3 OS=Arabidopsis thaliana GN=NPC3 PE=2 SV=1	Phosphoesterase family
BnaC05T0551400WE	-0.151815	0.284937	0.0377211	0.36698	-0.661977	0.00231187	-2.51452	0.170079	-0.295058	0.0117266	-0.268711	0.0800681	cystathionine gamma-synthase 1, chloroplastic; K01739 cystathionine gamma-synthase [EC:2.5.1.48] (A)	Cystathionine gamma-synthase 1, chloroplastic OS=Arabidopsis thaliana GN=CGS1 PE=1 SV=3	Cys/Met metabolism PLP-dependent enzyme
BnaC05T0557200WE	0.14135	0.106427	-0.338858	0.0138227	-0.897047	0.00235057	0.556807	0.0600128	-0.0403183	0.325136	-0.0487762	0.0978093	40S ribosomal protein S7-like; K02993 small subunit ribosomal protein S7e (A)	40S ribosomal protein S7 OS=Brassica oleracea GN=RPS7 PE=2 SV=1	Ribosomal protein S7e
BnaC06T0051900WE	0.181528	0.184531	-0.687723	0.00189579	-1.29506	0.00197108	-0.973507	0.00580943	0.248817	0.0315665	-0.363228	0.0320056	--	Myrosinase-binding protein 2 OS=Arabidopsis thaliana GN=F-ATMBP PE=2 SV=1	Jacalin-like lectin domain
BnaC06T0189800WE	0.178065	0.104396	-0.634672	0.0270396	-0.403333	0.00573919	-0.234081	0.0442146	-0.152972	0.14732	-0.183516	0.165312	probable H/ACA ribonucleoprotein complex subunit 1; K13199 plasminogen activator inhibitor 1 RNA-binding protein (A)	--	Stm1
BnaC06T0212100WE	-0.338982	0.0127918	-0.29394	0.0169321	1.1207	0.00677335	0.289269	0.0906967	-0.139326	0.374958	0.573403	0.0924026	receptor-like protein kinase FERONIA; K04730 interleukin-1 receptor-associated kinase 1 [EC:2.7.11.1] (A)	Receptor-like protein kinase FERONIA OS=Arabidopsis thaliana GN=FER PE=1 SV=1	Protein tyrosine kinase
BnaC06T0438200WE	0.417586	0.0804317	0.568851	0.0394541	0.197308	0.0196829	-0.318815	0.25613	0.19162	0.0863175	0.71342	0.0426553	CPK2.1; calcium-dependent protein kinase 29; K13412 calcium-dependent protein kinase [EC:2.7.11.1] (A)	Calcium-dependent protein kinase 29 OS=Arabidopsis thaliana GN=CPK29 PE=2 SV=2	EF-hand domain pair
BnaC06T0439500WE	0.500864	0.0818187	0.389361	0.0308535	0.0241376	0.228686	0.0229835	0.200157	0.169322	0.364804	-0.0668339	0.254667	enoyl-CoA hydratase 2, peroxisomal-like; K19658 peroxisomal enoyl-CoA hydratase 2 [EC:4.2.1.119] (A)	Enoyl-CoA hydratase 2, peroxisomal OS=Arabidopsis thaliana GN=ECH2 PE=1 SV=1	N-terminal half of MaoC dehydratase
BnaC06T0460800WE	-0.0995277	0.332956	-0.169923	0.341308	-0.835039	0.0816832	-0.400283	0.0622622	-0.413434	0.0254585	-0.188543	0.00819346	hypothetical protein; K14962 COMPASS component SWD2 (A)	Epidermis-specific secreted glycoprotein EP1 OS=Daucus carota GN=EP1 PE=1 SV=1	D-mannose binding lectin
BnaC07T0319900WE	-0.131623	0.20629	-0.213272	0.060697	-0.219805	0.0385953	-0.527827	0.0760272	0.0863349	0.0907608	-0.0787859	0.266256	acetyl-CoA acetyltransferase, cytosolic 1; K00626 acetyl-CoA C-acetyltransferase [EC:2.3.1.9] (A)	Acetyl-CoA acetyltransferase, cytosolic 1 OS=Arabidopsis thaliana GN=AAT1 PE=2 SV=1	Thiolase, C-terminal domain
BnaC07T0383300WE	0.123565	0.104739	0.113885	0.310801	0.865674	0.00429577	-0.0295232	0.385384	0.226984	0.353736	0.316999	0.363309	peptide methionine sulfoxide reductase B5-like; K07305 peptide-methionine (R)-S-oxide reductase [EC:1.8.4.12] (A)	Peptide methionine sulfoxide reductase B2, chloroplastic OS=Arabidopsis thaliana GN=MSRB2 PE=1 SV=1	SelR domain
BnaC07T0405500WE	0.0681932	0.37456	0.384947	0.0941071	0.64198	0.0218516	0.236457	0.0900129	0.12818	0.287398	0.442758	0.100541	--	Mediator-associated protein 1 OS=Arabidopsis thaliana GN=At4g25210 PE=1 SV=1	Protein of unknown function, DUF573
BnaC07T0437500WE	-0.295619	0.0589419	-0.314123	0.0499053	-0.441181	0.0285124	-0.577172	0.0108085	0.0488635	0.273682	-0.643433	0.0103616	ATPase 2, plasma membrane-type-like; K01535 H+-transporting ATPase [EC:3.6.3.6] (A)	ATPase 2, plasma membrane-type OS=Arabidopsis thaliana GN=AHA2 PE=1 SV=2	Cation transporter/ATPase, N-terminus
BnaC08T0281500WE	0.590554	0.058243	-0.55009	0.0969016	-0.952627	0.0446924	-1.13635	0.0562022	0.203763	0.168454	0.209526	0.0424995	peroxiredoxin-2D; K03386 peroxiredoxin (alkyl hydroperoxide reductase subunit C) [EC:1.11.1.15] (A)	Peroxiredoxin-2E, chloroplastic OS=Arabidopsis thaliana GN=PRXIIE PE=1 SV=2	Redoxin
BnaC09T0048100WE	0.311076	0.191494	0.156029	0.090506	-0.656498	0.00986435	-0.271504	0.0525092	0.100934	0.288933	0.344147	0.274151	mevalonate kinase; K00869 mevalonate kinase [EC:2.7.1.36] (A)	Mevalonate kinase OS=Arabidopsis thaliana GN=At5g27450 PE=2 SV=1	Signal peptidase subunit
BnaC09T0106700WE	-0.251705	0.141759	0.110947	0.262939	0.581252	0.000439616	0.293082	0.248887	-0.249152	0.103772	0.301179	0.0782852	U1 small nuclear ribonucleoprotein 70 kDa-like; K11093 U1 small nuclear ribonucleoprotein 70kDa (A)	U1 small nuclear ribonucleoprotein 70 kDa OS=Arabidopsis thaliana GN=RNU1 PE=1 SV=1	RNA recognition motif. (a.k.a. RRM, RBD, or RNP domain)
Bnascaffold1716T0000100WE	-0.683037	0.00624038	-0.0835553	0.114064	0.326175	0.00722791	-0.475735	0.141105	-0.364894	0.0836344	0.891221	0.0552344	calcium-independent phospholipase A2-gamma-like; K16815 calcium-independent phospholipase A2-gamma (A)	Patatin-like protein 1 OS=Arabidopsis thaliana GN=PLP1 PE=1 SV=2	Patatin-like phospholipase
Bnascaffold1716T0007200WE	-0.705254	0.0432669	0.179894	0.137845	0.909449	0.00642091	0.938138	0.20152	0.131337	0.265432	0.421022	0.291027	serine hydroxymethyltransferase 1, mitochondrial-like; K00600 glycine hydroxymethyltransferase [EC:2.1.2.1] (A)	Serine hydroxymethyltransferase 1, mitochondrial OS=Arabidopsis thaliana GN=SHM1 PE=1 SV=1	Serine hydroxymethyltransferase
Bnascaffold1716T0013000WE	-0.612835	0.101863	0.0658598	0.159196	1.20001	0.0312225	-0.488073	0.118688	-0.637462	0.0682103	0.495297	0.0172681	gamma-glutamyltranspeptidase 1-like; K18592 gamma-glutamyltranspeptidase / glutathione hydrolase / leukotriene-C4 hydrolase [EC:2.3.2.2 3.4.19.13 3.4.19.14] (A)	Gamma-glutamyltranspeptidase 1 OS=Arabidopsis thaliana GN=GGT1 PE=2 SV=1	Gamma-glutamyltranspeptidase (GGT)
Bnascaffold1716T0019000WE	-0.309464	0.17413	0.140377	0.120796	1.28801	0.0133834	-0.422589	0.0160046	0.172979	0.0800022	0.602767	0.113251	--	Expansin-like A1 OS=Arabidopsis thaliana GN=EXLA1 PE=2 SV=1	Pollen allergen
Bnascaffold286T0003800WE	-0.457535	0.018074	0.553037	0.129048	0.711204	0.0226506	0.120916	0.326224	-0.161406	0.321856	0.104775	0.277376	uncharacterized LOC103847160; K19026 spatacsin (A)	Protein DDB_G0268328 OS=Dictyostelium discoideum GN=DDB_G0268328 PE=4 SV=1	Spatacsin C-terminus
Bnascaffold286T0020300WE	0.307377	0.244831	0.656454	0.0371292	2.17534	0.014191	-0.765885	0.0166435	0.0699408	0.379446	0.648184	0.0129654	hypothetical protein; K13700 abhydrolase domain-containing protein 6 [EC:3.1.1.23] (A)	Epoxide hydrolase 4 OS=Homo sapiens GN=EPHX4 PE=2 SV=2	Alpha/beta hydrolase family
Bnascaffold286T0024500WE	0.224527	0.0438172	-0.0017466	0.325692	1.52727	0.0101343	0.219998	0.272163	-0.132625	0.0905582	0.691445	0.0273369	L-ascorbate peroxidase 5, peroxisomal; K00434 L-ascorbate peroxidase [EC:1.11.1.11] (A)	L-ascorbate peroxidase 5, peroxisomal OS=Arabidopsis thaliana GN=APX5 PE=2 SV=2	Peroxidase
Bnascaffold286T0025500WE	0.0319677	0.350435	0.170745	0.242271	-0.665696	0.041465	-0.0977517	0.356981	-0.127413	0.220662	-0.0633395	0.212085	aconitate hydratase 1; K01681 aconitate hydratase [EC:4.2.1.3] (A)	Aconitate hydratase 1 OS=Arabidopsis thaliana GN=ACO1 PE=1 SV=2	Aconitase C-terminal domain
Bnascaffold286T0050800WE	0.17875	0.246488	-0.290778	0.0416902	-0.669309	0.00804446	0.43553	0.00171983	0.166383	0.166185	0.167958	0.240686	la protein 1; K11090 lupus La protein (A)	La protein 1 OS=Arabidopsis thaliana GN=LA1 PE=1 SV=1	-
Bnascaffold286T0054900WE	0.0397425	0.238631	0.145199	0.181409	0.415678	0.0075853	0.534174	0.0789531	0.487532	0.0232383	-0.264346	0.199546	clathrin assembly plant-like protein, putative; K20043 clathrin coat assembly protein AP180 (A)	Probable clathrin assembly protein At4g32285 OS=Arabidopsis thaliana GN=At4g32285 PE=1 SV=2	ANTH domain
Bnascaffold286T0062700WE	0.182563	0.357254	0.0820637	0.210061	1.93602	0.0251333	-0.534692	0.0369993	-0.264922	0.108012	1.29479	0.0145866	glucan endo-1,3-beta-glucosidase 5-like; K19893 glucan endo-1,3-beta-glucosidase 5/6 [EC:3.2.1.39] (A)	Glucan endo-1,3-beta-glucosidase 5 OS=Arabidopsis thaliana GN=At4g31140 PE=1 SV=1	X8 domain
BnaC01T0038700WE	-0.284607	0.0460865	-0.0975901	0.267818	-0.369513	0.0341834	-0.286879	0.0744436	-0.135896	0.105004	-0.28117	0.115127	la protein 1; K11090 lupus La protein (A)	La protein 1 OS=Arabidopsis thaliana GN=LA1 PE=1 SV=1	-
BnaC05T0491700WE	-0.267755	0.00794863	-0.457054	0.0283946	-0.305433	0.0273584	-0.428287	0.0124984	0.0549274	0.368391	0.264737	0.111559	hsp70 nucleotide exchange factor fes1-like; K09562 hsp70-interacting protein (A)	Hsp70 nucleotide exchange factor FES1 OS=Phaeosphaeria nodorum (strain SN15 / ATCC MYA-4574 / FGSC 10173) GN=FES1 PE=3 SV=1	--
BnaA10T0051200WE	-0.189018	0.0147118	0.189791	0.0465831	-0.0310872	0.254184	-0.157013	0.118847	0.146743	0.0329071	-0.0835015	0.106688	--	Protein TIC110, chloroplastic OS=Arabidopsis thaliana GN=TIC110 PE=1 SV=1	--
BnaC01T0358000WE	0.226868	0.0949398	-0.292836	0.141868	0.0368391	0.371581	-0.3395	0.0634633	-0.397738	0.0341567	-0.165023	0.207644	--	TSA1-like protein OS=Arabidopsis thaliana GN=NAI2 PE=1 SV=1	--
BnaA04T0102000WE	-0.244253	0.0245299	-0.466471	0.0166291	0.196641	0.0560432	0.243631	0.0939106	-0.197555	0.00582692	0.304206	0.0837756	--	Uncharacterized protein At5g39570 OS=Arabidopsis thaliana GN=At5g39570 PE=1 SV=1	--
BnaA03T0256600WE	0.267639	0.287842	0.233859	0.274294	0.212239	0.128055	-0.288778	0.20742	0.247264	0.142841	0.151475	0.36369	cycloeucalenol cycloisomerase; K08246 cycloeucalenol cycloisomerase [EC:5.5.1.9] (A)	Cycloeucalenol cycloisomerase OS=Arabidopsis thaliana GN=CPI1 PE=2 SV=1	--
BnaA06T0281300WE	0.30097	0.147544	-0.157159	0.385826	0.553323	0.305482	-0.537164	0.0674742	0.0454415	0.0625405	0.10571	0.286819	flavonol synthase 3; K05278 flavonol synthase [EC:1.14.11.23] (A)	Flavonol synthase 3 OS=Arabidopsis thaliana GN=FLS3 PE=2 SV=1	2OG-Fe(II) oxygenase superfamily
BnaA04T0232600WE	2.14538	0.0622966	0.312597	0.05239	0.0279801	0.115868	-1.54883	0.22321	-0.880085	0.0507901	0.00635845	0.333131	steroid 5-alpha-reductase DET2; K09591 steroid 5-alpha-reductase [EC:1.3.1.22] (A)	Steroid 5-alpha-reductase DET2 OS=Arabidopsis thaliana GN=DET2 PE=1 SV=2	3-oxo-5-alpha-steroid 4-dehydrogenase
BnaA05T0026900WE	0.219063	0.0638614	-0.106696	0.255143	0.083955	0.14573	0.130891	0.215631	0.0957411	0.0484483	0.11951	0.0680268	3-isopropylmalate dehydratase small subunit 3-like; K01704 3-isopropylmalate/(R)-2-methylmalate dehydratase small subunit [EC:4.2.1.33 4.2.1.35] (A)	3-isopropylmalate dehydratase small subunit 3 OS=Arabidopsis thaliana GN=At2g43090 PE=1 SV=1	Aconitase C-terminal domain
BnaA06T0124700WE	-0.078623	0.0724092	0.181369	0.0692967	0.334503	0.00861993	-0.0270812	0.363862	0.276882	0.103084	0.417532	0.0363895	actin-related protein 4; K11340 actin-like protein 6A (A)	Actin-related protein 4 OS=Arabidopsis thaliana GN=ARP4 PE=1 SV=1	Actin
BnaC01T0021500WE	-0.0766582	0.358138	0.088519	0.0042223	0.298835	0.00420566	0.0311698	0.232796	-0.0192113	0.0291322	0.110741	0.0313381	cyclase-associated protein 1; K17261 adenylyl cyclase-associated protein (A)	Cyclase-associated protein 1 OS=Arabidopsis thaliana GN=CAP1 PE=2 SV=1	Adenylate cyclase associated (CAP) C terminal
BnaA04T0027400WE	-0.0946529	0.130911	0.00490689	0.342954	-0.129037	0.0155576	-0.378966	0.0381362	-0.0518697	0.0417422	-0.16225	0.0551914	adenylosuccinate synthetase, chloroplastic-like; K01939 adenylosuccinate synthase [EC:6.3.4.4] (A)	Adenylosuccinate synthetase, chloroplastic OS=Arabidopsis thaliana GN=PURA PE=1 SV=1	Adenylosuccinate synthetase
BnaC06T0032000WE	-0.364817	0.20541	-0.0583557	0.285078	-0.433704	0.0020649	-0.325313	0.0912975	0.220205	0.0788673	0.269086	0.0913411	zinc-binding alcohol dehydrogenase domain-containing protein 2-like; K07119 uncharacterized protein (A)	Zinc-binding alcohol dehydrogenase domain-containing protein 2 OS=Mus musculus GN=Zadh2 PE=1 SV=1	Alcohol dehydrogenase GroES-like domain
BnaC03T0070500WE	0.355454	0.0487208	0.383488	0.0902301	-0.220141	0.0351274	-0.0868632	0.330728	0.0681508	0.328084	0.20735	0.147705	putative glucose-6-phosphate 1-epimerase; K01792 glucose-6-phosphate 1-epimerase [EC:5.1.3.15] (A)	Putative glucose-6-phosphate 1-epimerase OS=Cenchrus ciliaris PE=2 SV=1	Aldose 1-epimerase
BnaA08T0241400WE	0.292705	0.0552093	0.235899	0.104567	0.267887	0.0184097	0.0756402	0.0201482	0.105005	0.19531	0.0434766	0.328931	dol-P-Man:Man(6)GlcNAc(2)-PP-Dol alpha-1,2-mannosyltransferase; K03846 alpha-1,2-mannosyltransferase [EC:2.4.1.259 2.4.1.261] (A)	Dol-P-Man:Man(6)GlcNAc(2)-PP-Dol alpha-1,2-mannosyltransferase OS=Arabidopsis thaliana GN=ALG9 PE=1 SV=1	Alg9-like mannosyltransferase family
BnaA09T0069200WE	0.0128559	0.362155	0.168628	0.386337	0.0267576	0.302715	-0.0179471	0.375979	0.372833	0.0097083	-0.296799	0.0250966	GID1a-1; hypothetical protein; K14493 gibberellin receptor GID1 [EC:3.-.-.-] (A)	Probable carboxylesterase 120 OS=Arabidopsis thaliana GN=CXE20 PE=2 SV=1	alpha/beta hydrolase fold
BnaA08T0122600WE	0.0443391	0.279771	0.0643233	0.00535571	-0.141888	0.00270822	-0.123468	0.0317608	0.0291543	0.377368	0.00929935	0.368354	LL-diaminopimelate aminotransferase, chloroplastic; K10206 LL-diaminopimelate aminotransferase [EC:2.6.1.83] (A)	LL-diaminopimelate aminotransferase, chloroplastic OS=Arabidopsis thaliana GN=DAP PE=1 SV=1	Aminotransferase class I and II
BnaA09T0083400WE	0.0151216	0.148762	0.0671257	0.318045	-0.375919	0.00321047	-0.184242	0.228549	0.250369	0.0420875	0.000159821	0.22918	cysteine desulfurase 1, mitochondrial; K04487 cysteine desulfurase [EC:2.8.1.7] (A)	Cysteine desulfurase, mitochondrial OS=Arabidopsis thaliana GN=NIFS1 PE=1 SV=1	Aminotransferase class-V
BnaA03T0280600WE	-0.0525936	0.187822	-0.267074	0.0698341	0.139793	0.206275	0.167495	0.121862	-0.0672291	0.199372	0.230598	0.0142325	V-type proton ATPase subunit F; K02151 V-type H+-transporting ATPase subunit F (A)	V-type proton ATPase subunit F OS=Arabidopsis thaliana GN=VHA-F PE=2 SV=1	ATP synthase (F/14-kDa) subunit
BnaA08T0278600WE	-0.0706122	0.0561044	0.373812	0.00801987	0.348498	0.0158872	0.128486	0.349309	0.100085	0.345512	-0.0577877	0.221461	calreticulin-3; K08057 calreticulin (A)	Calreticulin-3 OS=Arabidopsis thaliana GN=CRT3 PE=1 SV=2	Calreticulin family
BnaA08T0177700WE	0.129954	0.03931	-0.0509589	0.361386	0.252065	0.138098	-0.0566591	0.379085	0.217206	0.163641	0.240887	0.0677165	cysteine proteinase RD19a-like; K01373 cathepsin F [EC:3.4.22.41] (A)	Cysteine proteinase RD19a OS=Arabidopsis thaliana GN=RD19A PE=2 SV=1	Cathepsin propeptide inhibitor domain (I29)
Bnascaffold1716T0009800WE	-0.015865	0.145835	0.131171	0.250281	-0.443075	0.0198653	0.0128352	0.286597	-0.20797	0.0361292	-0.362083	0.0146253	phospho-2-dehydro-3-deoxyheptonate aldolase 1, chloroplastic; K01626 3-deoxy-7-phosphoheptulonate synthase [EC:2.5.1.54] (A)	Phospho-2-dehydro-3-deoxyheptonate aldolase 1, chloroplastic OS=Arabidopsis thaliana GN=DHS1 PE=2 SV=2	Class-II DAHP synthetase family
Bnascaffold286T0036100WE	0.114626	0.0351643	0.207524	0.0931101	0.295923	0.0101413	-0.261335	0.0559457	0.0759591	0.111762	0.0237263	0.300878	coatomer subunit gamma; K17267 coatomer protein complex, subunit gamma (A)	Coatomer subunit gamma OS=Arabidopsis thaliana GN=At4g34450 PE=1 SV=2	Coatomer gamma subunit appendage platform subdomain
BnaA10T0009000WE	-0.107745	0.275279	-0.048068	0.0760893	-0.361285	0.0548086	0.0532758	0.132161	0.29022	0.0377905	-0.0603559	0.173112	pyruvate dehydrogenase E1 component subunit alpha-3, chloroplastic-like; K00161 pyruvate dehydrogenase E1 component alpha subunit [EC:1.2.4.1] (A)	Pyruvate dehydrogenase E1 component subunit alpha-3, chloroplastic OS=Arabidopsis thaliana GN=PDH-E1 ALPHA PE=2 SV=1	Dehydrogenase E1 component
BnaA09T0188600WE	0.022852	0.224559	0.0415858	0.159758	0.107589	0.0547125	-0.0880647	0.105352	0.0689715	0.271037	-0.135521	0.0295248	2-oxoglutarate dehydrogenase, mitochondrial-like; K00164 2-oxoglutarate dehydrogenase E1 component [EC:1.2.4.2] (A)	2-oxoglutarate dehydrogenase, mitochondrial OS=Dictyostelium discoideum GN=ogdh PE=3 SV=1	Dehydrogenase E1 component
BnaA07T0185300WE	-0.0297094	0.245845	0.103662	0.0142999	0.367187	0.0459839	-0.267805	0.0408143	0.239498	0.212166	-0.182869	0.171387	2-oxoglutarate dehydrogenase, mitochondrial-like; K00164 2-oxoglutarate dehydrogenase E1 component [EC:1.2.4.2] (A)	2-oxoglutarate dehydrogenase, mitochondrial OS=Dictyostelium discoideum GN=ogdh PE=3 SV=1	Dehydrogenase E1 component
BnaA08T0245300WE	0.42759	0.375963	0.61804	0.246256	-0.527354	0.239894	0.28567	0.218942	0.137976	0.302199	-0.280001	0.125334	periodic tryptophan protein 2 homolog; K14558 periodic tryptophan protein 2 (A)	Periodic tryptophan protein 2 homolog OS=Pongo abelii GN=PWP2 PE=2 SV=1	Dip2/Utp12 Family
BnaA06T0378500WE	-0.474511	0.0054756	0.287888	0.0979693	0.196907	0.0269048	0.0362883	0.295095	0.471566	0.0847891	0.44856	0.0888056	replication factor C subunit 3; K10756 replication factor C subunit 3/5 (A)	Replication factor C subunit 3 OS=Arabidopsis thaliana GN=RFC3 PE=2 SV=1	DNA polymerase III, delta subunit
Bnascaffold286T0042300WE	-0.149552	0.0524252	-0.0141879	0.0995968	0.217355	0.0407315	-0.240676	0.00747783	0.0337322	0.171471	-0.0939406	0.123229	dynamin-related protein 3A; K17065 dynamin 1-like protein [EC:3.6.5.5] (A)	Dynamin-related protein 3A OS=Arabidopsis thaliana GN=DRP3A PE=1 SV=2	Dynamin GTPase effector domain
BnaC09T0048600WE	0.0177687	0.377556	0.0850165	0.0923182	0.25699	0.0456283	-0.0687815	0.049941	0.236772	0.149408	0.242691	0.0637347	mitochondrial Rho GTPase 1; K07870 Ras homolog gene family, member T1 (A)	Mitochondrial Rho GTPase 1 OS=Arabidopsis thaliana GN=MIRO1 PE=1 SV=1	EF hand associated
BnaA08T0024900WE	0.107944	0.36506	0.129682	0.0988117	0.415376	0.0592908	-0.174441	0.222384	0.381724	0.0287329	-0.150576	0.212528	7-dehydrocholesterol reductase; K00213 7-dehydrocholesterol reductase [EC:1.3.1.21] (A)	7-dehydrocholesterol reductase OS=Arabidopsis thaliana GN=DWF5 PE=1 SV=1	Ergosterol biosynthesis ERG4/ERG24 family
BnaA07T0252500WE	0.202722	0.13115	-0.0835868	0.293623	-0.399027	0.0036876	-0.388636	0.0323933	-0.0402508	0.109852	-0.145714	0.273824	eukaryotic translation initiation factor 2A-like; K15026 translation initiation factor 2A (A)	Eukaryotic translation initiation factor 2A OS=Schizosaccharomyces pombe (strain 972 / ATCC 24843) GN=SPBC4B4.04 PE=1 SV=1	Eukaryotic translation initiation factor eIF2A
BnaA07T0279500WE	0.485753	0.220778	-0.242079	0.374098	-0.040178	0.341944	-0.369373	0.292627	-0.311931	0.312546	0.0039689	0.381664	exosome complex component CSL4; K07573 exosome complex component CSL4 (A)	Exosome complex component CSL4 OS=Homo sapiens GN=EXOSC1 PE=1 SV=1	Exosome complex exonuclease RRP4 N-terminal region
BnaA01T0323100WE	0.0726457	0.143172	-0.0574042	0.350932	-0.494538	0.225127	-0.337304	0.0912975	0.0384127	0.382584	0.223946	0.0619406	DES5b; acyl-[acyl-carrier-protein] desaturase 5, chloroplastic-like; K03921 acyl-[acyl-carrier-protein] desaturase [EC:1.14.19.2 1.14.19.11 1.14.19.26] (A)	Acyl-[acyl-carrier-protein] desaturase 5, chloroplastic OS=Arabidopsis thaliana GN=S-ACP-DES5 PE=1 SV=1	Fatty acid desaturase
Bnascaffold286T0051500WE	-0.0754098	0.372926	-0.0396435	0.149972	-0.0927263	0.0456148	-0.18988	0.0592765	0.193702	0.00330542	-0.0480669	0.213942	protein transport protein Sec24-like At4g32640; K14007 protein transport protein SEC24 (A)	Protein transport protein Sec24-like At4g32640 OS=Arabidopsis thaliana GN=At4g32640 PE=2 SV=3	Gelsolin repeat
BnaC05T0507000WE	-0.101476	0.0804294	0.0737149	0.146397	0.0770571	0.0455902	-0.0492539	0.177097	0.118413	0.058634	0.0162464	0.259593	protein transport protein Sec24-like At3g07100; K14007 protein transport protein SEC24 (A)	Protein transport protein Sec24-like At3g07100 OS=Arabidopsis thaliana GN=At3g07100 PE=2 SV=2	Gelsolin repeat
BnaA07T0167700WE	0.305818	0.00590242	0.0441022	0.129762	-0.0496256	0.288633	-0.0217454	0.153953	0.083185	0.0535367	-0.00848483	0.296771	glucose-6-phosphate 1-dehydrogenase, cytoplasmic isoform 2; K00036 glucose-6-phosphate 1-dehydrogenase [EC:1.1.1.49 1.1.1.363] (A)	Glucose-6-phosphate 1-dehydrogenase, cytoplasmic isoform 2 OS=Arabidopsis thaliana GN=ACG12 PE=2 SV=1	Glucose-6-phosphate dehydrogenase, NAD binding domain
BnaA03T0051900WE	-0.026196	0.263007	0.359616	0.0120748	0.0226919	0.12216	-0.0718842	0.298209	0.324212	0.0117928	-0.189066	0.208189	asparagine synthetase [glutamine-hydrolyzing] 3-like; K01953 asparagine synthase (glutamine-hydrolysing) [EC:6.3.5.4] (A)	Asparagine synthetase [glutamine-hydrolyzing] 3 OS=Arabidopsis thaliana GN=ASN3 PE=2 SV=1	Glutamine amidotransferase domain
BnaA04T0088500WE	0.150755	0.0922457	-0.438488	0.0623756	-0.213831	0.365201	0.368989	0.132609	0.362314	0.00905224	0.402047	0.106227	glutamine synthetase cytosolic isozyme 1-1-like; K01915 glutamine synthetase [EC:6.3.1.2] (A)	Glutamine synthetase cytosolic isozyme 1-1 OS=Arabidopsis thaliana GN=GLN1-1 PE=1 SV=2	Glutamine synthetase, beta-Grasp domain
BnaA04T0081700WE	-0.0423077	0.166293	-0.2508	0.00886545	-0.00811583	0.281592	-0.0935553	0.184606	-0.241322	0.062384	-0.220196	0.0386226	glutamine synthetase, chloroplastic; K01915 glutamine synthetase [EC:6.3.1.2] (A)	Glutamine synthetase, chloroplastic OS=Brassica napus GN=GLN2 PE=2 SV=1	Glutamine synthetase, beta-Grasp domain
BnaC06T0282200WE	0.0265624	0.36102	0.0137523	0.211151	0.367405	0.0020064	0.22321	0.0336922	-0.00767109	0.331899	0.117597	0.0218516	glutathione S-transferase U20; K00799 glutathione S-transferase [EC:2.5.1.18] (A)	Glutathione S-transferase U20 OS=Arabidopsis thaliana GN=GSTU20 PE=1 SV=1	Glutathione S-transferase, C-terminal domain
BnaA06T0433300WE	-0.319941	0.213537	-0.278182	0.0300288	-0.00108936	0.256147	0.150619	0.286029	0.0500096	0.0770941	-0.127844	0.301222	glutathione S-transferase Z1; K01800 maleylacetoacetate isomerase [EC:5.2.1.2] (A)	Glutathione S-transferase Z1 OS=Arabidopsis thaliana GN=GSTZ1 PE=1 SV=1	Glutathione S-transferase, N-terminal domain
BnaA06T0466300WE	0.048129	0.277514	0.0700487	0.127812	0.187944	0.0450225	-0.43777	0.0813645	0.0400656	0.262124	-0.218155	0.00211818	Os03g0332500; K02866 large subunit ribosomal protein L10e (A)	Acid phosphatase 1 OS=Solanum lycopersicum GN=APS1 PE=2 SV=1	HAD superfamily, subfamily IIIB (Acid phosphatase)
BnaA10T0174200WE	0.0325671	0.369283	-0.228292	0.0106712	-0.366625	0.00538289	-0.41434	0.0447701	-0.0724043	0.194191	-0.202377	0.0132039	kinesin-related protein 11-like; K11498 centromeric protein E (A)	Importin-5 OS=Mus musculus GN=Ipo5 PE=1 SV=3	HEAT repeat
BnaA01T0233300WE	-0.120932	0.313276	0.259472	0.0282777	0.12867	0.0272293	0.0827466	0.0993898	0.0957185	0.091238	0.131044	0.110173	DEAD-box ATP-dependent RNA helicase 2-like; K13025 ATP-dependent RNA helicase [EC:3.6.4.13] (A)	DEAD-box ATP-dependent RNA helicase 2 OS=Arabidopsis thaliana GN=RH2 PE=2 SV=2	Helicase conserved C-terminal domain
BnaC07T0420700WE	-0.0568539	0.147706	-0.0794235	0.0465964	-0.315686	0.033934	0.360761	0.311079	0.0857777	0.279222	0.219245	0.207577	hypothetical protein; K14293 importin subunit beta-1 (A)	Probable importin subunit beta-4 OS=Schizosaccharomyces pombe (strain 972 / ATCC 24843) GN=kap123 PE=3 SV=1	Importin-beta N-terminal domain
BnaC05T0494300WE	-0.0157793	0.242214	-0.027717	0.0585551	-0.186303	0.00763319	-0.0307641	0.253956	0.0346938	0.284162	-0.0575966	0.0946896	importin subunit beta-1; K14293 importin subunit beta-1 (A)	Importin subunit beta-1 OS=Arabidopsis thaliana GN=KPNB1 PE=1 SV=1	Importin-beta N-terminal domain
BnaC01T0014500WE	0.021872	0.269545	-0.267404	0.0752376	-0.404262	0.000337357	0.24997	0.0245214	-0.144988	0.165984	-0.101898	0.300586	isocitrate dehydrogenase [NAD] regulatory subunit 1, mitochondrial-like; K00030 isocitrate dehydrogenase (NAD+) [EC:1.1.1.41] (A)	Isocitrate dehydrogenase [NAD] regulatory subunit 1, mitochondrial OS=Arabidopsis thaliana GN=IDH1 PE=2 SV=2	Isocitrate/isopropylmalate dehydrogenase
BnaA07T0279100WE	-0.0102281	0.164037	0.0507299	0.282225	-0.140529	0.0247932	0.0859256	0.0947297	0.0214679	0.360211	-0.146935	0.0136089	cytosolic isocitrate dehydrogenase [NADP]-like; K00031 isocitrate dehydrogenase [EC:1.1.1.42] (A)	Cytosolic isocitrate dehydrogenase [NADP] OS=Arabidopsis thaliana GN=CICDH PE=2 SV=1	Isocitrate/isopropylmalate dehydrogenase
BnaA02T0052300WE	0.0332147	0.361673	0.21429	0.0258427	0.424991	0.0316838	-0.159471	0.297095	-0.24388	0.0165201	0.174355	0.046223	3-isopropylmalate dehydrogenase 3, chloroplastic; K00052 3-isopropylmalate dehydrogenase [EC:1.1.1.85] (A)	3-isopropylmalate dehydrogenase 3, chloroplastic OS=Arabidopsis thaliana GN=IMDH3 PE=1 SV=1	Isocitrate/isopropylmalate dehydrogenase
BnaA02T0328100WE	0.0281973	0.371475	-0.399948	0.0320256	0.0832759	0.381866	-0.235514	0.149896	-0.11165	0.161569	0.0810487	0.241504	U6 snRNA-associated Sm-like protein LSm7; K12626 U6 snRNA-associated Sm-like protein LSm7 (A)	Sm-like protein LSM7 OS=Arabidopsis thaliana GN=LSM7 PE=1 SV=1	LSM domain
BnaA01T0064800WE	-0.119529	0.0338105	0.0495872	0.283916	-0.196472	0.0144984	-0.497316	0.0150868	0.293581	0.0391127	-0.125727	0.228006	programmed cell death protein 4-like; K16865 programmed cell death protein 4 (A)	Programmed cell death protein 4 OS=Gallus gallus GN=PDCD4 PE=2 SV=1	MA3 domain
BnaA09T0015100WE	0.0139503	0.161661	0.0567753	0.204806	-0.285457	0.00624838	-0.23542	0.0187682	0.242574	0.0351426	0.0163596	0.269685	DNA replication licensing factor MCM7-like; K02210 DNA replication licensing factor MCM7 [EC:3.6.4.12] (A)	DNA replication licensing factor MCM7 OS=Arabidopsis thaliana GN=MCM7 PE=1 SV=2	MCM N-terminal domain
BnaA01T0155100WE	-0.0766601	0.192863	0.0315763	0.140427	-0.233183	0.0210247	-0.125957	0.321201	0.0636215	0.145739	-0.162267	0.0593758	uncharacterized LOC103853496; K02140 F-type H+-transporting ATPase subunit g (A)	--	Mitochondrial ATP synthase g subunit
BnaC01T0396100WE	-0.0853203	0.0822782	-0.0364976	0.269903	0.295592	0.0259	-0.273	0.0303812	0.168011	0.0674048	0.0679547	0.187604	splicing factor 3B subunit 3-like; K12830 splicing factor 3B subunit 3 (A)	Splicing factor 3B subunit 3 OS=Mus musculus GN=Sf3b3 PE=2 SV=1	Mono-functional DNA-alkylating methyl methanesulfonate N-term
BnaA09T0225500WE	0.0198361	0.375951	0.280834	0.104284	0.299387	0.046998	-0.039469	0.353954	-0.0158601	0.0834173	0.0270913	0.200851	peroxisomal membrane protein PMP22; K13347 peroxisomal membrane protein 2 (A)	Peroxisomal membrane protein PMP22 OS=Arabidopsis thaliana GN=PMP22 PE=1 SV=1	Mpv17 / PMP22 family
BnaA01T0325200WE	-0.172148	0.00226575	-0.131667	0.106543	-0.256376	0.0326271	0.243114	0.0372207	-0.0808794	0.0731579	0.00390957	0.272274	6-phosphogluconate dehydrogenase, decarboxylating 3; K00033 6-phosphogluconate dehydrogenase [EC:1.1.1.44 1.1.1.343] (A)	6-phosphogluconate dehydrogenase, decarboxylating 3 OS=Arabidopsis thaliana GN=At3g02360 PE=2 SV=1	NAD binding domain of 6-phosphogluconate dehydrogenase
BnaA09T0116000WE	-0.00275859	0.168227	0.0557252	0.093871	0.188906	0.0274944	-0.162409	0.031522	0.0387188	0.256603	-0.0527087	0.172352	NADH dehydrogenase [ubiquinone] 1 alpha subcomplex subunit 9, mitochondrial-like; K03953 NADH dehydrogenase (ubiquinone) 1 alpha subcomplex subunit 9 (A)	NADH dehydrogenase [ubiquinone] 1 alpha subcomplex subunit 9, mitochondrial OS=Arabidopsis thaliana GN=At2g20360 PE=1 SV=2	NAD(P)H-binding
BnaA04T0087700WE	-0.155353	0.0068799	0.0552407	0.138677	0.187015	0.0133282	-0.123989	0.110267	0.132205	0.0853748	0.00378172	0.385234	NADH dehydrogenase [ubiquinone] iron-sulfur protein 1, mitochondrial; K03934 NADH dehydrogenase (ubiquinone) Fe-S protein 1 [EC:1.6.5.3 1.6.99.3] (A)	NADH dehydrogenase [ubiquinone] iron-sulfur protein 1, mitochondrial OS=Arabidopsis thaliana GN=EMB1467 PE=1 SV=2	NADH-ubiquinone oxidoreductase subunit G, C-terminal
BnaC01T0051400WE	-0.0618727	0.0148993	0.0374817	0.324883	-0.269749	0.0096417	0.107546	0.0417005	0.0161011	0.257363	-0.0124473	0.363652	aspartate--tRNA ligase, cytoplasmic; K01876 aspartyl-tRNA synthetase [EC:6.1.1.12] (A)	Aspartate--tRNA ligase 2, cytoplasmic OS=Arabidopsis thaliana GN=IBI1 PE=1 SV=1	OB-fold nucleic acid binding domain
BnaA01T0326500WE	-0.164979	0.0110318	0.145335	0.0600878	0.171557	0.0233938	-0.147207	0.0936455	0.0373145	0.384557	0.072977	0.0159168	probable mitochondrial-processing peptidase subunit beta; K17732 mitochondrial-processing peptidase subunit beta [EC:3.4.24.64] (A)	Probable mitochondrial-processing peptidase subunit beta OS=Arabidopsis thaliana GN=At3g02090 PE=2 SV=2	Peptidase M16 inactive domain
BnaA09T0103300WE	-0.0325691	0.259158	-0.0144	0.26536	-0.485815	0.0374484	0.0308756	0.31895	-0.105617	0.17465	-0.102233	0.161211	exosome complex exonuclease RRP44-like; K12585 exosome complex exonuclease DIS3/RRP44 [EC:3.1.13.-] (A)	Exosome complex exonuclease RRP44 OS=Mus musculus GN=Dis3 PE=2 SV=4	PIN domain
BnaA08T0300100WE	-0.54063	0.164429	-0.013664	0.282325	0.611873	0.0887228	-2.44723	0.11518	0.0138234	0.112372	0.206794	0.0985581	probable pectinesterase/pectinesterase inhibitor 7; K01051 pectinesterase [EC:3.1.1.11] (A)	Probable pectinesterase/pectinesterase inhibitor 7 OS=Arabidopsis thaliana GN=PME7 PE=2 SV=1	Plant invertase/pectin methylesterase inhibitor
BnaA08T0208800WE	0.73114	0.0674662	-0.551185	0.124306	-0.853704	0.0831228	-0.721385	0.0680383	0.0979764	0.364288	0.494334	0.0502022	peptidyl-prolyl cis-trans isomerase NIMA-interacting 4-like; K09579 peptidyl-prolyl cis-trans isomerase NIMA-interacting 4 [EC:5.2.1.8] (A)	Peptidyl-prolyl cis-trans isomerase NIMA-interacting 4 OS=Xenopus tropicalis GN=pin4 PE=2 SV=1	PPIC-type PPIASE domain
BnaA07T0206000WE	-0.10656	0.0111787	0.00732065	0.231119	-0.0946341	0.191759	-0.235747	0.0333355	0.18631	0.0199726	-0.0963144	0.0503049	proteasome subunit beta type-1-like; K02732 20S proteasome subunit beta 6 [EC:3.4.25.1] (A)	Proteasome subunit beta type-1 OS=Arabidopsis thaliana GN=PBF1 PE=1 SV=2	Proteasome subunit
Bnascaffold286T0056900WE	-0.00741201	0.0596725	-0.133093	0.0968417	-0.494066	0.00422439	0.0691354	0.176179	-0.0318598	0.106508	-0.210314	0.0664178	aspartate aminotransferase, chloroplastic; K00811 aspartate aminotransferase, chloroplastic [EC:2.6.1.1] (A)	Aspartate aminotransferase, chloroplastic OS=Arabidopsis thaliana GN=ASP5 PE=1 SV=2	Protein kinase domain
Bnascaffold286T0028900WE	0.253581	0.122183	-0.31674	0.0977062	0.402759	0.112733	0.0468867	0.201047	0.0618362	0.0544289	0.177004	0.0512216	uncharacterized protein At2g17340-like; K09680 type II pantothenate kinase [EC:2.7.1.33] (A)	Uncharacterized protein At2g17340 OS=Arabidopsis thaliana GN=At2g17340 PE=1 SV=1	Protein of unknown function DUF89
BnaA04T0157100WE	0.178408	0.172431	0.0717904	0.0850062	0.199473	0.0363737	-0.223495	0.299856	0.109103	0.107572	0.0872785	0.159877	probable protein phosphatase 2C 21; K17499 protein phosphatase 1G [EC:3.1.3.16] (A)	Probable protein phosphatase 2C 21 OS=Arabidopsis thaliana GN=PPC4-2 PE=1 SV=1	Protein phosphatase 2C
BnaC04T0008200WE	-0.0238252	0.295401	-0.133166	0.177741	0.183618	0.341486	-0.250205	0.133976	0.138062	0.164794	0.0606879	0.145366	probable receptor-like protein kinase At2g47060; K13436 pto-interacting protein 1 [EC:2.7.11.1] (A)	Probable receptor-like protein kinase At2g47060 OS=Arabidopsis thaliana GN=At2g47060 PE=1 SV=1	Protein tyrosine kinase
BnaA03T0041400WE	0.445286	0.0915576	-0.651078	0.16318	-0.0617448	0.225951	-1.19698	0.0981072	-0.98978	0.219137	-0.172513	0.0651064	pyruvate kinase, cytosolic isozyme-like; K00873 pyruvate kinase [EC:2.7.1.40] (A)	Pyruvate kinase, cytosolic isozyme OS=Glycine max PE=2 SV=1	Pyruvate kinase, alpha/beta domain
BnaA04T0227200WE	0.350705	0.093243	-0.0751886	0.197869	-0.406024	0.0114757	-0.264611	0.0573394	-0.187526	0.149694	-0.181914	0.190702	40S ribosomal protein S5-1; K02989 small subunit ribosomal protein S5e (A)	40S ribosomal protein S5-1 OS=Arabidopsis thaliana GN=RPS5A PE=1 SV=1	Ribosomal protein S7p/S5e
BnaA03T0093200WE	-0.124337	0.0446893	0.299921	0.182298	-0.0698637	0.268752	-0.0426571	0.321282	-0.183	0.0211433	-0.228484	0.10779	40S ribosomal protein S16-3-like; K02960 small subunit ribosomal protein S16e (A)	40S ribosomal protein S16-3 OS=Arabidopsis thaliana GN=RPS16C PE=2 SV=1	Ribosomal protein S9/S16
BnaC07T0349000WE	-0.468768	0.0189629	0.146399	0.286428	-0.47774	0.0262649	-0.0873315	0.364934	0.0272954	0.352347	0.280408	0.361435	eukaryotic translation initiation factor 3 subunit L-like; K15029 translation initiation factor 3 subunit L (A)	Eukaryotic translation initiation factor 3 subunit L OS=Nematostella vectensis GN=v1g169424 PE=3 SV=1	RNA polymerase I-associated factor PAF67
BnaC02T0529600WE	0.369607	0.0474911	0.389993	0.0307791	0.459629	0.0357678	0.256582	0.144772	0.0899166	0.216776	0.0883473	0.223752	polyadenylate-binding protein 2; K14396 polyadenylate-binding protein 2 (A)	Polyadenylate-binding protein 2 OS=Arabidopsis thaliana GN=PABN2 PE=1 SV=1	RNA recognition motif. (a.k.a. RRM, RBD, or RNP domain)
BnaC01T0041200WE	0.0178191	0.295016	-0.0236935	0.240761	-0.378669	0.00656361	0.0311733	0.266612	0.110654	0.0927954	-0.183017	0.0578485	serine hydroxymethyltransferase 3, chloroplastic; K00600 glycine hydroxymethyltransferase [EC:2.1.2.1] (A)	Serine hydroxymethyltransferase 3, chloroplastic OS=Arabidopsis thaliana GN=SHM3 PE=1 SV=2	Serine hydroxymethyltransferase
BnaC01T0431400WE	-0.0266966	0.210153	0.148265	0.0354831	0.0836375	0.0373657	0.0331788	0.180964	0.109773	0.0703964	-0.00318482	0.220377	bifunctional 3-dehydroquinate dehydratase/shikimate dehydrogenase, chloroplastic-like; K13832 3-dehydroquinate dehydratase / shikimate dehydrogenase [EC:4.2.1.10 1.1.1.25] (A)	Bifunctional 3-dehydroquinate dehydratase/shikimate dehydrogenase, chloroplastic OS=Arabidopsis thaliana GN=EMB3004 PE=1 SV=1	Shikimate / quinate 5-dehydrogenase
BnaC05T0224000WE	0.0264302	0.150725	0.0516754	0.314946	0.184436	0.0150044	-0.278512	0.0256111	0.141675	0.0883824	-0.109805	0.022606	BOXAR-4, bkr3; 3-oxoacyl-[acyl-carrier-protein] reductase 1, chloroplastic-like; K00059 3-oxoacyl-[acyl-carrier protein] reductase [EC:1.1.1.100] (A)	3-oxoacyl-[acyl-carrier-protein] reductase 3, chloroplastic OS=Brassica napus GN=bkr3 PE=2 SV=1	short chain dehydrogenase
BnaA04T0259800WE	-0.147812	0.109859	-0.100919	0.108341	-0.31887	0.21228	0.202609	0.0276218	-0.0827858	0.134063	-0.175616	0.0183099	serine/threonine-protein phosphatase 5-like; K04460 serine/threonine-protein phosphatase 5 [EC:3.1.3.16] (A)	Serine/threonine-protein phosphatase 5 OS=Arabidopsis thaliana GN=PAPP5 PE=1 SV=1	Tetratricopeptide repeat
BnaA10T0191600WE	0.0611624	0.161882	0.040241	0.0995202	0.0569802	0.165561	-0.108406	0.126216	-0.137373	0.0638385	-0.0467313	0.160768	2-hydroxyacyl-CoA lyase; K12261 2-hydroxyacyl-CoA lyase 1 [EC:4.1.-.-] (A)	2-hydroxyacyl-CoA lyase OS=Arabidopsis thaliana GN=HACL PE=1 SV=1	Thiamine pyrophosphate enzyme, C-terminal TPP binding domain
BnaA04T0213400WE	-0.0607003	0.276975	-0.444789	0.0212819	0.267223	0.0279237	-0.106351	0.101278	0.12492	0.330545	0.199963	0.0777764	thioredoxin O1, mitochondrial; K03671 thioredoxin 1 (A)	Thioredoxin O1, mitochondrial OS=Arabidopsis thaliana GN=At2g35010 PE=2 SV=1	Thioredoxin
BnaC06T0204900WE	0.229547	0.210532	-0.177858	0.122829	0.240395	0.252939	0.194774	0.0954665	0.395874	0.0309933	0.431984	0.10058	serine/threonine protein phosphatase 2A 59 kDa regulatory subunit B' gamma isoform; K11584 serine/threonine-protein phosphatase 2A regulatory subunit B' (A)	Plant UBX domain-containing protein 5 OS=Arabidopsis thaliana GN=PUX5 PE=1 SV=1	UBA-like domain
BnaC05T0187700WE	0.25737	0.217589	0.434575	0.0129025	0.0818474	0.00447532	0.0802833	0.378586	0.181546	0.149684	-0.0624885	0.34235	SORBIDRAFT_01g001220, Sb01g001220; hypothetical protein; K13030 cyanohydrin beta-glucosyltransferase [EC:2.4.1.85] (A)	UDP-glycosyltransferase 85A2 OS=Arabidopsis thaliana GN=UGT85A2 PE=2 SV=1	UDP-glucoronosyl and UDP-glucosyl transferase
BnaC03T0040800WE	0.324943	0.24642	-0.467961	0.121714	0.223993	0.0325273	0.424673	0.316064	-0.19144	0.0993531	-0.234472	0.226064	putative upf0041 domain-containing protein; K11086 small nuclear ribonucleoprotein B and B' (A)	Mitochondrial pyruvate carrier 1 OS=Arabidopsis thaliana GN=MPC1 PE=3 SV=1	Uncharacterised protein family (UPF0041)
BnaA08T0206200WE	-0.00898617	0.0841462	0.186961	0.356264	0.365138	0.118017	0.278626	0.0273802	0.193922	0.129763	0.162582	0.339871	--	GDT1-like protein 4 OS=Arabidopsis thaliana GN=At1g25520 PE=2 SV=1	Uncharacterized protein family UPF0016
BnaA08T0254900WE	0.084859	0.300825	-0.247936	0.383009	-0.0932232	0.0909343	-0.0807079	0.144175	0.0569184	0.198987	0.198459	0.282723	V-type proton ATPase subunit C-like; K02148 V-type H+-transporting ATPase subunit C (A)	V-type proton ATPase subunit C OS=Arabidopsis thaliana GN=VHA-C PE=1 SV=1	V-ATPase subunit C
BnaC01T0059400WE	0.0753276	0.0801593	0.0994254	0.037819	0.461742	0.0128494	-0.126922	0.104406	0.0489544	0.377212	0.00592225	0.337292	villin-4-like; K05768 gelsolin (A)	Villin-4 OS=Arabidopsis thaliana GN=VLN4 PE=1 SV=1	Villin headpiece domain
Bnascaffold286T0004700WE	-0.228319	0.011727	0.0936336	0.0811724	0.136248	0.0381945	-0.0255586	0.092122	0.208747	0.00302642	-0.11672	0.041533	coatomer subunit alpha-2-like; K05236 coatomer protein complex, subunit alpha (xenin) (A)	Coatomer subunit alpha-1 OS=Arabidopsis thaliana GN=At1g62020 PE=2 SV=2	WD domain, G-beta repeat
Bnascaffold286T0053800WE	0.295228	0.117667	-0.157255	0.268137	0.386691	0.0136301	0.17431	0.350656	0.450123	0.0214043	-0.0365073	0.0612085	cellulose synthase A catalytic subunit 1 [UDP-forming]; K10999 cellulose synthase A [EC:2.4.1.12] (A)	Cellulose synthase A catalytic subunit 1 [UDP-forming] OS=Arabidopsis thaliana GN=CESA1 PE=1 SV=1	Zinc-binding RING-finger

## Sheet: (B) Proteome - late stage 
Table S8 B. Protein IDs that were common in current study and the late stage pathogenesis [17]. This list of proteins were significantly differentially abundant in one or more times points. A subset of top 30 proteins that were significant at least in two or more time points and their log2 fold change is >0.50 and < -0.50 were selected to present in the heatmap (Figure 7). Res = clubroot resistan…
Proteins	Log2 fold change Res1T.C	Qvalue Res1T.C	Log2 fold change Res4T.C	Qvalue Res4T.C	Log2 fold change Res7T.C	Qvalue Res7T.C	Log2 fold change Sus1T.C	Qvalue Sus1T.C	Log2 fold change Sus4T.C	Qvalue Sus4T.C	Log2 fold change Sus7T.C	Qvalue Sus7T.C	KEGG	Swissprot	Pfam
BnaC06T0450900WE	-0.406533	0.0204967	-0.91131	0.095218	-2.16836	0.0224689	0.0929763	0.279281	0.061165	0.378118	-0.65409	0.0132381	protein disulfide isomerase-like 1-2; K09580 protein disulfide-isomerase A1 [EC:5.3.4.1] (A)	Protein disulfide isomerase-like 1-2 OS=Arabidopsis thaliana GN=PDIL1-2 PE=2 SV=1	Thioredoxin-like domain
BnaC08T0208200WE	-0.750883	0.259382	-1.12038	0.0178572	-2.11164	0.0478175	-1.79405	0.0557793	0.430181	0.289986	0.140742	0.265137	BRCA1-A complex subunit BRE-like; K12173 BRCA1-A complex subunit BRE (A)	Pathogenesis-related protein 5 OS=Arabidopsis thaliana GN=At1g75040 PE=1 SV=1	Thaumatin family
BnaA03T0306200WE	-0.340618	0.194187	-0.32248	0.243561	-2.02909	0.0149517	0.331926	0.0837276	-0.476935	0.147343	-0.428504	0.140323	Chitinase / Hevein / PR-4 / Wheatwin2; K04730 interleukin-1 receptor-associated kinase 1 [EC:2.7.11.1] (A)	Hevein-like preproprotein OS=Arabidopsis thaliana GN=HEL PE=1 SV=1	Chitin recognition protein
BnaA07T0362700WE	-0.453911	0.0271531	-0.310171	0.276674	-1.94288	0.0390439	0.791329	0.00470075	0.0561784	0.340185	-0.907809	0.027002	adh1; alcohol dehydrogenase class-P; K18857 alcohol dehydrogenase class-P [EC:1.1.1.1] (A)	Alcohol dehydrogenase class-P OS=Arabidopsis thaliana GN=ADH1 PE=1 SV=2	Zinc-binding dehydrogenase
BnaA03T0105500WE	-0.0409305	0.28279	-0.393528	0.229124	-1.72851	0.021402	0.361771	0.00992989	-0.0779562	0.31401	-0.644127	0.0299783	sucrose synthase 1-like; K00695 sucrose synthase [EC:2.4.1.13] (A)	Sucrose synthase 1 OS=Arabidopsis thaliana GN=SUS1 PE=1 SV=3	Glycosyl transferases group 1
BnaA07T0365600WE	-0.204535	0.0324987	-0.821832	0.0687686	-1.61948	0.0132441	0.154481	0.0319703	-0.104245	0.244233	-0.34924	0.0313261	protein disulfide isomerase-like 1-2; K09580 protein disulfide-isomerase A1 [EC:5.3.4.1] (A)	Protein disulfide isomerase-like 1-2 OS=Arabidopsis thaliana GN=PDIL1-2 PE=2 SV=1	Thioredoxin-like domain
BnaA07T0335300WE	0.226293	0.0143382	-1.06476	0.00665619	-1.6133	0.0020751	-0.130279	0.377881	-0.0301407	0.126871	-0.397892	0.0163134	probable calcium-binding protein CML26; K13448 calcium-binding protein CML (A)	Probable calcium-binding protein CML26 OS=Arabidopsis thaliana GN=CML26 PE=1 SV=1	EF-hand domain pair
BnaA04T0006400WE	0.832191	0.028233	-0.980825	0.0597715	-1.5975	0.0179573	0.0891888	0.207326	-0.236305	0.154507	0.350142	0.1401	ubiquitin-40S ribosomal protein S27a-3; K02977 small subunit ribosomal protein S27Ae (A)	Ubiquitin-40S ribosomal protein S27a-3 OS=Arabidopsis thaliana GN=RPS27AC PE=1 SV=2	Ribosomal protein S27a
BnaC09T0499400WE	0.420976	0.0311732	-0.582156	0.00489945	-1.57824	0.0152195	0.331366	0.0592386	0.200218	0.355884	-0.100626	0.293324	transaldolase-like; K00616 transaldolase [EC:2.2.1.2] (A)	Transaldolase OS=Frankia alni (strain ACN14a) GN=tal PE=3 SV=1	Transaldolase
BnaC03T0212500WE	0.894506	0.0271159	-1.56012	0.00418649	-1.31825	0.0144149	-2.89487	0.166454	0.228418	0.162218	-0.760479	0.0145746	ferredoxin, root R-B1-like; K02639 ferredoxin (A)	Ferredoxin-3, chloroplastic OS=Arabidopsis thaliana GN=FD3 PE=1 SV=1	2Fe-2S iron-sulfur cluster binding domain
BnaA03T0166500WE	-0.130285	0.0443991	-0.369456	0.0866608	-1.265	0.0034358	0.0360176	0.344972	-0.111416	0.233665	-0.28234	0.021564	probable fructokinase-1; K00847 fructokinase [EC:2.7.1.4] (A)	Probable fructokinase-1 OS=Arabidopsis thaliana GN=At2g31390 PE=2 SV=1	pfkB family carbohydrate kinase
BnaA01T0239100WE	0.392569	0.027512	-0.740075	0.00347399	-1.24658	0.00291673	-0.0144523	0.383896	-0.127734	0.124304	-0.135198	0.315711	hypothetical protein; K02908 large subunit ribosomal protein L30e (A)	Putative 60S ribosomal protein L30-1 OS=Arabidopsis thaliana GN=RPL30A PE=3 SV=1	Ribosomal protein L7Ae/L30e/S12e/Gadd45 family
BnaC09T0431200WE	0.090254	0.282502	-0.067136	0.373661	-1.23837	0.0207172	0.249819	0.0391334	0.111132	0.280101	-0.401754	0.015958	sucrose synthase 1-like; K00695 sucrose synthase [EC:2.4.1.13] (A)	Sucrose synthase 1 OS=Arabidopsis thaliana GN=SUS1 PE=1 SV=3	Glycosyl transferases group 1
BnaC03T0326700WE	0.328295	0.119003	-0.749132	0.0985142	-1.23472	0.0287999	-0.47736	0.0310659	-0.0703341	0.211849	-0.141778	0.322937	endochitinase CH25-like; K01183 chitinase [EC:3.2.1.14] (A)	Endochitinase CH25 OS=Brassica napus PE=2 SV=1	Chitin recognition protein
BnaA02T0079400WE	-0.334436	0.059729	-0.347309	0.207793	-1.2059	0.0142509	0.023009	0.371698	0.210774	0.329722	-0.732897	0.0124212	aspartate aminotransferase, cytoplasmic isozyme 1-like; K14454 aspartate aminotransferase, cytoplasmic [EC:2.6.1.1] (A)	Aspartate aminotransferase, cytoplasmic isozyme 1 OS=Arabidopsis thaliana GN=ASP2 PE=1 SV=2	Aminotransferase class I and II
Bnascaffold2730T0004400WE	0.0485262	0.135477	-0.950129	0.000726963	-1.12829	2.39092e-05	-0.084493	0.292213	0.289013	0.047993	-0.468255	0.0378314	uncharacterized protein At2g39795, mitochondrial-like; K15414 complement component 1 Q subcomponent-binding protein, mitochondrial (A)	Uncharacterized protein At2g39795, mitochondrial OS=Arabidopsis thaliana GN=At2g39795 PE=2 SV=1	Mitochondrial glycoprotein
BnaA04T0075900WE	-0.0955306	0.024111	-0.704302	0.067141	-1.11489	0.00990748	0.19047	0.038788	-0.285334	0.105018	-0.546797	0.0113796	fructose-bisphosphate aldolase, cytoplasmic isozyme-like; K01623 fructose-bisphosphate aldolase, class I [EC:4.1.2.13] (A)	Fructose-bisphosphate aldolase, cytoplasmic isozyme 2 OS=Pisum sativum PE=3 SV=1	Fructose-bisphosphate aldolase class-I
BnaA03T0262200WE	-0.103523	0.266496	-0.617895	0.0134824	-1.10541	0.00514019	-0.036862	0.279958	-0.185577	0.07579	-0.157176	0.238685	CPK4.2; calcium-dependent protein kinase 4 (EC:2.7.11.1); K13412 calcium-dependent protein kinase [EC:2.7.11.1] (A)	Calcium-dependent protein kinase 4 OS=Arabidopsis thaliana GN=CPK4 PE=1 SV=1	EF-hand domain pair
BnaA08T0284200WE	0.416355	0.125038	-0.709125	0.00759206	-1.07337	0.00540492	-0.38263	0.121725	-0.0299866	0.0233814	0.450373	0.0882835	ran-binding protein 1 homolog a-like; K15306 Ran-binding protein 1 (A)	Ran-binding protein 1 homolog a OS=Arabidopsis thaliana GN=RANBP1A PE=1 SV=1	RanBP1 domain
BnaA07T0175100WE	-0.132465	0.0160547	-0.702033	0.0315221	-1.07175	0.0107668	-0.484947	0.139133	-0.251825	0.153245	-0.596347	0.00526518	fructose-bisphosphate aldolase, cytoplasmic isozyme; K01623 fructose-bisphosphate aldolase, class I [EC:4.1.2.13] (A)	Fructose-bisphosphate aldolase, cytoplasmic isozyme OS=Cicer arietinum GN=ALDC PE=2 SV=1	Fructose-bisphosphate aldolase class-I
BnaA09T0200400WE	0.141994	0.233834	-0.959064	0.0038884	-1.03105	0.00396491	0.0541734	0.174013	-0.26527	0.109186	-0.230248	0.07444	suppressor protein STM1-like; K13199 plasminogen activator inhibitor 1 RNA-binding protein (A)	--	Stm1
BnaA08T0277100WE	0.334612	0.0598582	-0.624526	0.0352577	-1.02576	0.0188271	-0.43172	0.0951756	-0.130544	0.336249	0.144102	0.252849	probable prefoldin subunit 4; K09550 prefoldin subunit 4 (A)	Probable prefoldin subunit 4 OS=Arabidopsis thaliana GN=AIP3 PE=1 SV=3	Prefoldin subunit
BnaA04T0109500WE	-0.0560391	0.292977	-1.12698	0.00421172	-0.984064	0.00480274	0.0434747	0.350897	-0.148651	0.198066	-0.280629	0.0898674	glutaredoxin-C2; K03676 glutaredoxin 3 (A)	Glutaredoxin-C2 OS=Arabidopsis thaliana GN=GRXC2 PE=2 SV=1	Glutaredoxin
BnaA08T0209500WE	0.0900283	0.095035	-0.660374	0.0109157	-0.96775	0.0107938	-0.372503	0.0918199	0.0133724	0.261202	0.108312	0.233277	eukaryotic translation initiation factor 5A-2; K03263 translation initiation factor 5A (A)	Eukaryotic translation initiation factor 5A-2 OS=Arabidopsis thaliana GN=ELF5A-2 PE=1 SV=1	KOW motif
BnaA02T0264500WE	0.513716	0.150264	0.715832	0.181303	-0.959869	0.0121244	0.67485	0.166204	0.409061	0.131086	-0.153032	0.0626196	probable 26S proteasome complex subunit sem1-2; K10881 26 proteasome complex subunit DSS1 (A)	Probable 26S proteasome complex subunit sem1-2 OS=Arabidopsis thaliana GN=At5g45010 PE=1 SV=1	DSS1/SEM1 family
BnaA03T0081400WE	0.316899	0.0114023	0.00394854	0.249516	-0.946058	0.0985142	-0.139294	0.215994	0.587627	0.046325	1.171	0.0232811	--	Lamin-like protein OS=Arabidopsis thaliana GN=At5g15350 PE=1 SV=1	Plastocyanin-like domain
BnaA08T0185000WE	-0.13295	0.0725625	-0.74319	0.00423486	-0.912606	0.00017539	-0.192279	0.215517	-0.0245167	0.331776	-0.0216936	0.357533	elongation factor 1-delta 1-like; K03232 elongation factor 1-beta (A)	Elongation factor 1-delta 2 OS=Arabidopsis thaliana GN=At2g18110 PE=1 SV=1	EF-1 guanine nucleotide exchange domain
BnaC03T0211900WE	-0.79361	0.222077	-1.55381	0.0172894	-0.90823	0.00558486	-1.06419	0.0319271	-0.0698479	0.365978	0.79929	0.0925624	60S acidic ribosomal protein P2-1-like; K02943 large subunit ribosomal protein LP2 (A)	60S acidic ribosomal protein P2-1 OS=Arabidopsis thaliana GN=RPP2A PE=2 SV=2	60s Acidic ribosomal protein
BnaA08T0252200WE	-0.542081	0.00455989	-1.09017	0.0262093	-0.881785	0.0198128	-0.120521	0.230386	-0.522653	0.021641	-0.327379	0.0209145	glyceraldehyde-3-phosphate dehydrogenase, cytosolic-like; K00134 glyceraldehyde 3-phosphate dehydrogenase [EC:1.2.1.12] (A)	Glyceraldehyde-3-phosphate dehydrogenase, cytosolic OS=Sinapis alba GN=GAPC PE=2 SV=2	Glyceraldehyde 3-phosphate dehydrogenase, NAD binding domain
BnaC01T0221000WE	0.898975	0.0131137	-0.976904	0.0222077	-0.86511	0.0498927	0.572695	0.35995	-0.177846	0.234572	0.201398	0.119156	peroxidase 34-like; K00430 peroxidase [EC:1.11.1.7] (A)	Peroxidase 34 OS=Arabidopsis thaliana GN=PER34 PE=1 SV=1	Peroxidase
BnaA09T0170100WE	0.125411	0.160221	-0.607182	0.0311196	-0.857302	0.0118069	-0.096459	0.22878	0.0248289	0.264169	0.203691	0.143957	calreticulin-1-like; K08057 calreticulin (A)	Calreticulin-1 OS=Arabidopsis thaliana GN=CRT1 PE=1 SV=1	Calreticulin family
BnaC06T0460800WE	-0.0995277	0.332956	-0.169923	0.341308	-0.835039	0.0816832	-0.400283	0.0622622	-0.413434	0.0254585	-0.188543	0.00819346	hypothetical protein; K14962 COMPASS component SWD2 (A)	Epidermis-specific secreted glycoprotein EP1 OS=Daucus carota GN=EP1 PE=1 SV=1	D-mannose binding lectin
BnaA05T0374000WE	-0.0458838	0.361948	-0.47606	0.019994	-0.832345	0.00623567	-0.647428	0.00214298	-0.345829	0.0774493	-0.0644216	0.304361	endochitinase CH25-like; K01183 chitinase [EC:3.2.1.14] (A)	Endochitinase CH25 OS=Brassica napus PE=2 SV=1	Chitin recognition protein
BnaC09T0458100WE	0.207238	0.131549	0.0990885	0.214555	-0.824888	0.000229918	-0.115014	0.189235	-0.517658	0.0296077	-0.295732	0.0150882	glutamate dehydrogenase 1-like; K00261 glutamate dehydrogenase (NAD(P)+) [EC:1.4.1.3] (A)	Glutamate dehydrogenase 1 OS=Arabidopsis thaliana GN=GDH1 PE=2 SV=1	Glu/Leu/Phe/Val dehydrogenase, dimerisation domain
BnaA08T0151100WE	0.255913	0.00744157	-0.37116	0.0188813	-0.823116	0.00186818	-0.015434	0.336378	0.0527096	0.0972472	-0.0326345	0.199453	polyadenylate-binding protein RBP45-like; K03231 elongation factor 1-alpha (A)	Polyadenylate-binding protein RBP45C OS=Arabidopsis thaliana GN=RBP45C PE=2 SV=1	RNA recognition motif. (a.k.a. RRM, RBD, or RNP domain)
BnaA07T0096800WE	-0.201402	0.145911	-0.943021	0.00251468	-0.799764	0.00149277	-0.468856	0.0292002	0.0926628	0.269972	-0.462011	0.0280052	glycine-rich protein 2; K09250 cellular nucleic acid-binding protein (A)	Cold shock domain-containing protein 4 OS=Arabidopsis thaliana GN=CSP4 PE=1 SV=1	Zinc knuckle
BnaA04T0013200WE	-0.468938	0.0414064	-0.33854	0.168581	-0.798168	0.0181253	0.152488	0.00644798	-0.315514	0.0193044	-0.638183	0.00846543	transketolase-1, chloroplastic; K00615 transketolase [EC:2.2.1.1] (A)	Transketolase-1, chloroplastic OS=Arabidopsis thaliana GN=TKL-1 PE=1 SV=1	Transketolase, C-terminal domain
BnaA04T0223800WE	-0.064647	0.0305291	-0.169594	0.229396	-0.797604	0.00551702	-0.0496225	0.247699	-0.195032	0.0761969	-0.400084	0.00399443	bifunctional enolase 2/transcriptional activator; K01689 enolase [EC:4.2.1.11] (A)	Bifunctional enolase 2/transcriptional activator OS=Arabidopsis thaliana GN=ENO2 PE=1 SV=1	Enolase, N-terminal domain
BnaC05T0246500WE	-0.357243	0.000579344	-0.593072	0.0358747	-0.796863	0.0123	-0.112407	0.330549	-0.100269	0.236029	-0.264755	0.184052	elongation factor 1-delta 1-like; K03232 elongation factor 1-beta (A)	Elongation factor 1-delta 2 OS=Arabidopsis thaliana GN=At2g18110 PE=1 SV=1	EF-1 guanine nucleotide exchange domain
BnaC09T0279900WE	0.190242	0.074924	-0.740702	0.0017066	-0.793171	0.0167173	-0.508329	0.0102338	0.298724	0.0162502	-0.488946	0.0221767	nascent polypeptide-associated complex subunit alpha-like protein 4; K03626 nascent polypeptide-associated complex subunit alpha (A)	Nascent polypeptide-associated complex subunit alpha-like protein 4 OS=Arabidopsis thaliana GN=At4g10480 PE=2 SV=1	NAC domain
BnaC08T0052500WE	0.638569	0.0835089	-0.0192664	0.0820593	-0.789005	0.0268143	-0.365062	0.149953	0.481419	0.00679176	-0.685574	0.0265147	--	Protein canopy homolog 1 OS=Xenopus laevis GN=cnpy1 PE=2 SV=1	TLR4 regulator and MIR-interacting MSAP
BnaA03T0394100WE	-0.227895	0.10567	-0.441071	0.139978	-0.772837	0.00629733	0.218955	0.110447	0.156133	0.0877242	-0.318975	0.234108	peptidyl-prolyl cis-trans isomerase FKBP15-1; K09569 FK506-binding protein 2 [EC:5.2.1.8] (A)	Peptidyl-prolyl cis-trans isomerase FKBP15-1 OS=Arabidopsis thaliana GN=FKBP15-1 PE=2 SV=2	FKBP-type peptidyl-prolyl cis-trans isomerase
BnaA03T0167800WE	0.059059	0.21254	-0.510078	0.0279041	-0.770643	0.0167015	0.544304	0.278098	0.160726	0.256385	0.396821	0.212205	probable glutathione peroxidase 2; K00432 glutathione peroxidase [EC:1.11.1.9] (A)	Probable glutathione peroxidase 2 OS=Arabidopsis thaliana GN=GPX2 PE=1 SV=1	Glutathione peroxidase
Bnascaffold286T0028200WE	-0.104174	0.171774	-0.830601	0.012259	-0.769982	0.0141723	0.0807931	0.363887	-0.300993	0.03092	-0.308266	0.0728189	asb8; ankyrin repeat and SOCS box containing 8; K10330 ankyrin repeat and SOCS box protein 8 (A)	Ankyrin repeat domain-containing protein 2 OS=Arabidopsis thaliana GN=AKR2 PE=1 SV=2	Ankyrin repeats (3 copies)
BnaA09T0369000WE	-0.0164575	0.0885028	-1.13062	0.0166341	-0.739677	0.0023827	0.551907	0.0613086	0.105982	0.27242	-0.337706	0.17322	acyl-CoA-binding protein; K08762 diazepam-binding inhibitor (GABA receptor modulator, acyl-CoA-binding protein) (A)	Acyl-CoA-binding protein OS=Brassica napus PE=3 SV=1	Acyl CoA binding protein
BnaA07T0332400WE	-0.0536804	0.353691	-0.310527	0.0529315	-0.734764	0.00599058	-0.283946	0.216388	0.444399	0.031545	-0.0542055	0.374223	transcription factor BTF3 homolog 4-like; K01527 nascent polypeptide-associated complex subunit beta (A)	Transcription factor BTF3 OS=Mus musculus GN=Btf3 PE=1 SV=3	NAC domain
BnaA08T0050200WE	-0.101381	0.129679	-0.756025	0.0140319	-0.733794	0.000890787	0.151439	0.286716	-0.382771	0.120022	0.196841	0.387278	RPS19; 40S ribosomal protein S19; K02965 small subunit ribosomal protein S19 (A)	Glycine-rich RNA-binding protein 2, mitochondrial OS=Arabidopsis thaliana GN=RBG2 PE=1 SV=1	RNA recognition motif. (a.k.a. RRM, RBD, or RNP domain)
BnaA06T0346000WE	0.810322	0.0107286	-0.561724	0.0122959	-0.725113	0.0084886	-0.81529	0.0732276	-0.441724	0.0169654	0.229533	0.140191	peptidyl-prolyl cis-trans isomerase Pin1; K09578 peptidyl-prolyl cis-trans isomerase NIMA-interacting 1 [EC:5.2.1.8] (A)	Peptidyl-prolyl cis-trans isomerase Pin1 OS=Arabidopsis thaliana GN=PIN1 PE=1 SV=1	PPIC-type PPIASE domain
BnaA08T0229700WE	-0.701994	0.0858345	0.162245	0.323397	-0.716046	0.135536	-0.112318	0.335508	-0.917998	0.0325572	0.0198011	0.378321	BRCA1-A complex subunit BRE-like; K12173 BRCA1-A complex subunit BRE (A)	Pathogenesis-related protein 5 OS=Arabidopsis thaliana GN=At1g75040 PE=1 SV=1	Thaumatin family
BnaA05T0391300WE	-0.0128238	0.364349	-0.706039	0.0283919	-0.704207	0.0322374	0.285919	0.234398	0.118469	0.386876	0.267411	0.117021	tubulin-folding cofactor B; K17262 tubulin-folding cofactor B (A)	Tubulin-folding cofactor B OS=Arabidopsis thaliana GN=TFCB PE=1 SV=1	CAP-Gly domain
BnaC03T0083500WE	-0.25159	0.106421	-0.103322	0.149834	-0.704204	0.00773505	-0.760847	0.0160923	0.416994	0.0342611	0.383047	0.288031	dihydrolipoyllysine-residue succinyltransferase component of 2-oxoglutarate dehydrogenase complex 1, mitochondrial-like; K00658 2-oxoglutarate dehydrogenase E2 component (dihydrolipoamide succinyltransferase) [EC:2.3.1.61] (A)	Dihydrolipoyllysine-residue succinyltransferase component of 2-oxoglutarate dehydrogenase complex 1, mitochondrial OS=Arabidopsis thaliana GN=At5g55070 PE=2 SV=1	Biotin-requiring enzyme
BnaA03T0286400WE	-0.452225	0.0194104	-1.04217	0.00256988	-0.696336	0.00451762	-0.0781842	0.265478	-0.0148676	0.317763	-0.444479	0.0440652	60S acidic ribosomal protein P1-2; K02942 large subunit ribosomal protein LP1 (A)	60S acidic ribosomal protein P1-2 OS=Arabidopsis thaliana GN=RPP1B PE=1 SV=2	60s Acidic ribosomal protein
BnaC04T0201600WE	-0.105406	0.199687	-0.984882	0.00907986	-0.690245	0.0138146	-0.630367	0.0156565	0.0757289	0.0906876	-0.392222	0.0374268	60S acidic ribosomal protein P2-2-like; K02943 large subunit ribosomal protein LP2 (A)	60S acidic ribosomal protein P2-1 OS=Arabidopsis thaliana GN=RPP2A PE=2 SV=2	60s Acidic ribosomal protein
BnaA10T0109700WE	-0.120912	0.273037	-1.01147	0.0125787	-0.688751	0.00141342	0.265984	0.36037	-0.452755	0.306284	-0.4987	0.114804	grpE protein homolog, mitochondrial; K03687 molecular chaperone GrpE (A)	Protein GrpE OS=Rhodopseudomonas palustris (strain TIE-1) GN=grpE PE=3 SV=1	GrpE
BnaA10T0008900WE	0.39004	0.0109358	-0.618327	0.0126465	-0.688072	0.0359964	-0.248381	0.066463	0.168798	0.235294	-0.22284	0.074764	60S acidic ribosomal protein P1-3; K02942 large subunit ribosomal protein LP1 (A)	60S acidic ribosomal protein P1-3 OS=Arabidopsis thaliana GN=RPP1C PE=1 SV=2	60s Acidic ribosomal protein
BnaA02T0367000WE	0.0627518	0.317445	-0.153753	0.106927	-0.686998	0.01335	-0.282651	0.0822782	-0.233629	0.0335115	0.102639	0.267631	bifunctional L-3-cyanoalanine synthase/cysteine synthase D2; K01738 cysteine synthase A [EC:2.5.1.47] (A)	Bifunctional L-3-cyanoalanine synthase/cysteine synthase D2 OS=Arabidopsis thaliana GN=CYSD2 PE=1 SV=1	Ribosomal protein S24e
BnaA08T0098300WE	0.275412	0.0989405	-0.83766	0.00850191	-0.686806	0.00639795	-0.0975313	0.310172	-0.0227013	0.385045	-0.195231	0.0291326	probable H/ACA ribonucleoprotein complex subunit 1; K13199 plasminogen activator inhibitor 1 RNA-binding protein (A)	--	Stm1
BnaC09T0007800WE	0.189086	0.287654	-0.772715	0.0122151	-0.680992	0.0143264	0.663178	0.0908265	0.00603726	0.369309	-0.283679	0.0207169	60S acidic ribosomal protein P1-2; K02942 large subunit ribosomal protein LP1 (A)	60S acidic ribosomal protein P1-2 OS=Arabidopsis thaliana GN=RPP1B PE=1 SV=2	60s Acidic ribosomal protein
BnaC06T0307200WE	-0.333435	0.0487624	-0.702277	0.0175139	-0.676567	0.00332832	-0.0226421	0.349316	-0.0877043	0.337928	-1.08258	0.00350616	transcription factor BTF3 homolog 4-like; K01527 nascent polypeptide-associated complex subunit beta (A)	Transcription factor BTF3 OS=Mus musculus GN=Btf3 PE=1 SV=3	NAC domain
BnaA05T0285600WE	0.182015	0.265306	-0.0348068	0.29507	-0.671982	0.0985134	-0.529811	0.0870589	0.447252	0.00927429	0.726899	0.0307955	--	Non-specific lipid-transfer protein-like protein At2g13820 OS=Arabidopsis thaliana GN=At2g13820 PE=1 SV=1	Probable lipid transfer
BnaC03T0266200WE	0.190187	0.211238	-0.765131	0.0190896	-0.665367	0.0169541	0.062893	0.334099	0.214007	0.0267464	-0.0240979	0.358201	60S acidic ribosomal protein P1-2; K02942 large subunit ribosomal protein LP1 (A)	60S acidic ribosomal protein P1-2 OS=Arabidopsis thaliana GN=RPP1B PE=1 SV=2	60s Acidic ribosomal protein
BnaC05T0102400WE	0.0350143	0.359049	-0.0765121	0.201406	-0.662827	0.00249436	-0.152168	0.0245493	0.144285	0.00644389	-0.0281064	0.299452	pyrophosphate--fructose 6-phosphate 1-phosphotransferase subunit beta 1; K00895 pyrophosphate--fructose-6-phosphate 1-phosphotransferase [EC:2.7.1.90] (A)	Pyrophosphate--fructose 6-phosphate 1-phosphotransferase subunit beta 1 OS=Arabidopsis thaliana GN=PFP-BETA1 PE=1 SV=1	Phosphofructokinase
BnaA06T0265000WE	-0.0644944	0.0525093	-0.440773	0.0036702	-0.662769	0.00256256	0.0972635	0.381597	-0.0332821	0.259956	-0.0865972	0.0528523	calnexin homolog 1; K08054 calnexin (A)	Calnexin homolog 1 OS=Arabidopsis thaliana GN=CNX1 PE=1 SV=1	Calreticulin family
BnaA10T0154500WE	-1.22164	0.0937974	0.0681641	0.200631	-0.653936	0.0445649	-0.32674	0.0835108	-0.175366	0.290809	0.0665625	0.373601	--	--	Root cap
BnaA03T0158600WE	0.50183	0.0495331	0.185436	0.367208	-0.648218	0.0404651	0.79912	0.167657	0.0391421	0.342293	-0.00845891	0.307022	mitochondrial import inner membrane translocase subunit TIM8; K17780 mitochondrial import inner membrane translocase subunit TIM8 (A)	Mitochondrial import inner membrane translocase subunit TIM8 OS=Arabidopsis thaliana GN=TIM8 PE=1 SV=1	Tim10/DDP family zinc finger
BnaA09T0477700WE	-0.169441	0.0233912	-0.414253	0.00796725	-0.646887	0.000812464	-0.220268	0.053313	0.00786186	0.308032	-0.148147	0.145808	protein disulfide isomerase-like 1-3; K09580 protein disulfide-isomerase A1 [EC:5.3.4.1] (A)	Protein disulfide isomerase-like 1-3 OS=Arabidopsis thaliana GN=PDIL1-3 PE=2 SV=1	Thioredoxin-like domain
BnaC03T0487100WE	-0.0735895	0.269214	-0.556985	0.0352328	-0.625879	0.023567	-0.472907	0.0683877	-0.10233	0.0387624	0.0228664	0.0966915	calnexin homolog 1-like; K08054 calnexin (A)	Calnexin homolog 1 OS=Arabidopsis thaliana GN=CNX1 PE=1 SV=1	Calreticulin family
BnaA08T0170800WE	-0.133433	0.0599657	-0.269261	0.00972951	-0.623444	0.00193807	-0.000353478	0.153998	-0.164175	0.0583857	-0.332181	0.0482343	heat shock 70 kDa protein 9, mitochondrial-like; K04043 molecular chaperone DnaK (A)	Heat shock 70 kDa protein 9, mitochondrial OS=Arabidopsis thaliana GN=HSP70-9 PE=2 SV=1	Hsp70 protein
BnaA10T0124700WE	-0.0343553	0.361623	-0.602798	0.00304389	-0.623255	0.00979046	-0.171539	0.0324925	0.00491028	0.273309	-0.31453	0.0243346	nucleosome assembly protein 1;3; K11279 nucleosome assembly protein 1-like 1 (A)	Nucleosome assembly protein 1;3 OS=Arabidopsis thaliana GN=NAP1;3 PE=1 SV=1	Nucleosome assembly protein (NAP)
BnaC08T0221200WE	-0.0323876	0.224267	-0.552326	0.001436	-0.621524	0.023567	-0.434135	0.132839	-0.413547	0.0201229	0.041675	0.374489	protein disulfide isomerase-like 1-1; K09580 protein disulfide-isomerase A1 [EC:5.3.4.1] (A)	Protein disulfide isomerase-like 1-1 OS=Arabidopsis thaliana GN=PDIL1-1 PE=1 SV=1	Thioredoxin-like domain
BnaA02T0087200WE	-0.0152471	0.283488	-0.746348	0.0130601	-0.615264	0.0515846	-1.00969	0.0932845	0.59546	0.0419238	0.335642	0.0350526	20 kDa chaperonin, chloroplastic; K04078 chaperonin GroES (A)	20 kDa chaperonin, chloroplastic OS=Arabidopsis thaliana GN=CPN21 PE=1 SV=2	Chaperonin 10 Kd subunit
BnaA03T0304100WE	0.0615009	0.0514534	-0.574889	0.0117128	-0.603122	0.0140631	-0.250793	0.094123	-0.0637389	0.119735	0.142387	0.166515	hypothetical protein; K02894 large subunit ribosomal protein L23e (A)	Histone-lysine N-methyltransferase SUVR4 OS=Arabidopsis thaliana GN=SUVR4 PE=1 SV=2	Ubiquitin-binding WIYLD domain
BnaA01T0017300WE	-0.284128	0.0082773	-0.0488585	0.362988	-0.594906	0.0123511	-0.324035	0.0096325	-0.121859	0.117605	-0.104291	0.257033	60S ribosomal protein L11-2; K02868 large subunit ribosomal protein L11e (A)	60S ribosomal protein L11-2 OS=Arabidopsis thaliana GN=RPL11B PE=2 SV=2	Ribosomal protein L5
BnaA01T0254600WE	0.331435	0.198108	-0.0480304	0.186508	-0.591041	0.0149854	-1.10417	0.00872987	-0.166632	0.0820506	-0.369978	0.0418593	uncharacterized LOC104583002; K04506 E3 ubiquitin-protein ligase SIAH1 [EC:2.3.2.27] (A)	Jacalin-related lectin 34 OS=Arabidopsis thaliana GN=JAL34 PE=1 SV=1	Jacalin-like lectin domain
BnaC05T0480300WE	-0.111867	0.117679	-0.17189	0.077347	-0.590968	0.00280855	-0.0986862	0.162476	-0.215698	0.0339548	-0.0312064	0.318167	40S ribosomal protein S17-3; K02962 small subunit ribosomal protein S17e (A)	Nudix hydrolase 26, chloroplastic OS=Arabidopsis thaliana GN=NUDT26 PE=1 SV=1	NUDIX domain
BnaA10T0176400WE	0.136887	0.198836	-0.553514	0.0141662	-0.589338	0.00600339	-0.0819542	0.317279	0.0162955	0.338713	-0.148742	0.118318	elongation factor 1-beta 2; K03232 elongation factor 1-beta (A)	Elongation factor 1-beta 1 OS=Arabidopsis thaliana GN=At5g12110 PE=2 SV=2	EF-1 guanine nucleotide exchange domain
BnaC06T0470800WE	-0.655792	0.0509965	-0.426738	0.00251505	-0.586156	0.0758781	0.641069	0.0300376	-0.644147	0.04495	-0.246742	0.232168	hypothetical protein; K14962 COMPASS component SWD2 (A)	Epidermis-specific secreted glycoprotein EP1 OS=Daucus carota GN=EP1 PE=1 SV=1	PAN-like domain
BnaA02T0256700WE	-0.119108	0.0776611	-0.496463	0.0443385	-0.582048	0.00179649	0.439226	0.0213481	-0.397354	0.0685686	-0.419109	0.00977792	GST1; glutathione S-transferase; K00799 glutathione S-transferase [EC:2.5.1.18] (A)	Glutathione S-transferase F3 OS=Arabidopsis thaliana GN=GSTF3 PE=2 SV=1	Glutathione S-transferase, C-terminal domain
BnaC04T0303200WE	0.193167	0.293054	0.00769784	0.213538	-0.580938	0.00932085	0.205562	0.216762	0.366626	0.00522144	-0.361358	0.0203851	heat shock 70 kDa protein 15; K09489 heat shock 70kDa protein 4 (A)	Heat shock 70 kDa protein 15 OS=Arabidopsis thaliana GN=HSP70-15 PE=1 SV=1	Hsp70 protein
BnaA01T0304400WE	-0.1808	0.0188353	-0.272927	0.0125724	-0.576697	0.00114905	0.0648958	0.129738	-0.07462	0.15408	-0.103879	0.108323	60S ribosomal protein L22-2-like; K02891 large subunit ribosomal protein L22e (A)	60S ribosomal protein L22-2 OS=Arabidopsis thaliana GN=RPL22B PE=2 SV=1	Ribosomal L22e protein family
BnaA08T0220800WE	-0.216739	0.0189776	-0.497868	0.00179319	-0.570275	0.000230161	-0.0687002	0.184254	-0.00616942	0.320221	-0.11914	0.0717356	protein disulfide isomerase-like 1-1; K09580 protein disulfide-isomerase A1 [EC:5.3.4.1] (A)	Protein disulfide isomerase-like 1-1 OS=Arabidopsis thaliana GN=PDIL1-1 PE=1 SV=1	Thioredoxin-like domain
BnaA09T0066700WE	-0.0632426	0.386202	-0.387389	0.105977	-0.56601	0.0249816	-0.581232	0.0485012	0.663812	0.00295865	-0.371093	0.122951	40S ribosomal protein S19-3-like; K02966 small subunit ribosomal protein S19e (A)	40S ribosomal protein S19-3 OS=Arabidopsis thaliana GN=RPS19C PE=2 SV=1	Ribosomal protein S19e
BnaC03T0258900WE	-0.255404	0.0710334	-0.596538	0.00424395	-0.562001	0.0190473	0.065694	0.246906	-0.0185344	0.258388	-0.0674876	0.344258	uncharacterized protein OsI_027940-like; K15730 cytosolic prostaglandin-E synthase [EC:5.3.99.3] (A)	Uncharacterized protein OsI_027940 OS=Oryza sativa subsp. indica GN=OsI_027940 PE=1 SV=2	CS domain
BnaA10T0292900WE	-0.270681	0.0423884	-0.862022	0.00391338	-0.561102	0.00104812	0.457942	0.0118397	-0.131521	0.137809	-0.218743	0.0458943	wall-associated receptor kinase-like 20; K04733 interleukin-1 receptor-associated kinase 4 [EC:2.7.11.1] (A)	Wall-associated receptor kinase-like 20 OS=Arabidopsis thaliana GN=WAKL20 PE=2 SV=1	Wall-associated receptor kinase galacturonan-binding
BnaA04T0197300WE	0.259688	0.110109	-0.896738	0.020417	-0.558887	0.060373	-0.142768	0.194827	0.0819375	0.313959	-0.0215475	0.360449	40S ribosomal protein S12-1; K02951 small subunit ribosomal protein S12e (A)	40S ribosomal protein S12-2 OS=Arabidopsis thaliana GN=RPS12C PE=1 SV=1	Ribosomal protein L7Ae/L30e/S12e/Gadd45 family
BnaA08T0142000WE	0.268619	0.0762692	0.019921	0.25765	-0.557893	0.00971279	0.0463133	0.169709	0.191539	0.0740279	-0.0855473	0.0698751	hypothetical protein; K11426 SET and MYND domain-containing protein (A)	--	--
BnaC08T0141800WE	0.0463833	0.173937	-0.823367	0.0215291	-0.554097	0.0123329	0.122793	0.0888566	0.0838859	0.173396	0.0575033	0.260329	calreticulin-2-like; K08057 calreticulin (A)	Calreticulin-2 OS=Arabidopsis thaliana GN=CRT2 PE=1 SV=3	Calreticulin family
BnaA10T0243300WE	-0.0663753	0.378888	-0.623734	0.0104984	-0.552204	0.00431426	-0.263988	0.0854998	-0.0309937	0.309192	-0.282811	0.00368928	soluble inorganic pyrophosphatase 1, chloroplastic-like; K01507 inorganic pyrophosphatase [EC:3.6.1.1] (A)	Soluble inorganic pyrophosphatase 6, chloroplastic OS=Arabidopsis thaliana GN=PPA6 PE=1 SV=1	Inorganic pyrophosphatase
BnaA04T0188600WE	0.190237	0.0306947	-0.341103	0.0257639	-0.550588	0.00440198	0.180169	0.124797	-0.188308	0.0558082	-0.323148	0.0108339	glutathione S-transferase F9-like; K00799 glutathione S-transferase [EC:2.5.1.18] (A)	Glutathione S-transferase F9 OS=Arabidopsis thaliana GN=GSTF9 PE=1 SV=1	Glutathione S-transferase, N-terminal domain
BnaC04T0149500WE	-0.131037	0.33268	-0.271654	0.0242696	-0.542396	0.00244486	-0.293019	0.184249	0.105647	0.142072	-0.36274	0.0315697	probable CCR4-associated factor 1 homolog 7; K12581 CCR4-NOT transcription complex subunit 7/8 (A)	Probable CCR4-associated factor 1 homolog 7 OS=Arabidopsis thaliana GN=CAF1-7 PE=2 SV=2	Ribosomal protein L7Ae/L30e/S12e/Gadd45 family
BnaA01T0175700WE	0.114184	0.113899	-0.3796	0.0424481	-0.542137	0.014935	-0.153411	0.144673	0.0315049	0.230186	0.241983	0.0272248	calreticulin-1; K08057 calreticulin (A)	Calreticulin-1 OS=Arabidopsis thaliana GN=CRT1 PE=1 SV=1	Calreticulin family
Bnascaffold286T0010300WE	0.0965262	0.244316	-0.107993	0.049838	-0.534941	0.0189384	-0.367431	0.01366	-0.215268	0.0272755	-0.242662	0.0486028	heat shock 70 kDa protein 9, mitochondrial; K04043 molecular chaperone DnaK (A)	Heat shock 70 kDa protein 9, mitochondrial OS=Arabidopsis thaliana GN=HSP70-9 PE=2 SV=1	Hsp70 protein
BnaC04T0148200WE	-0.0865353	0.199372	-1.02483	0.00186042	-0.526656	0.0195505	-0.00781699	0.139801	0.161807	0.0514839	-0.286553	0.00414505	--	--	--
BnaA07T0056700WE	0.0899776	0.151273	-0.0384314	0.171394	-0.523826	0.00503407	-0.150504	0.0911898	-0.0733778	0.118765	-0.200906	0.0594554	60S ribosomal protein L5-1; K02932 large subunit ribosomal protein L5e (A)	60S ribosomal protein L5-1 OS=Arabidopsis thaliana GN=ATL5 PE=2 SV=2	Ribosomal L18 C-terminal region
BnaC04T0467900WE	0.106327	0.242274	-0.595325	0.0130311	-0.518307	0.00125916	-0.438573	0.120956	0.215906	0.0217422	-0.375115	0.167877	60S acidic ribosomal protein P2-2-like; K02943 large subunit ribosomal protein LP2 (A)	60S acidic ribosomal protein P2-1 OS=Arabidopsis thaliana GN=RPP2A PE=2 SV=2	60s Acidic ribosomal protein
BnaA06T0057200WE	-0.208639	0.0126617	-0.243911	0.0193805	-0.517693	0.00727686	-0.143829	0.00186042	-0.147065	0.016151	-0.260956	0.0580841	probable elongation factor 1-gamma 1; K03233 elongation factor 1-gamma (A)	Probable elongation factor 1-gamma 1 OS=Arabidopsis thaliana GN=At1g09640 PE=2 SV=1	Glutathione S-transferase, C-terminal domain
BnaA08T0232800WE	-0.00235622	0.255627	-0.656411	0.0313573	-0.514613	0.0316836	0.207869	0.146025	-0.31388	0.0150294	0.259594	0.0639562	NAP1-related protein 2; K11290 template-activating factor I (A)	NAP1-related protein 2 OS=Arabidopsis thaliana GN=NRP2 PE=1 SV=2	Nucleosome assembly protein (NAP)
BnaA01T0083000WE	0.148336	0.0192152	-0.595666	0.0322319	-0.511817	0.0434142	-0.0711723	0.169507	0.330067	0.103102	0.291159	0.0412601	small ubiquitin-related modifier 1-like; K12160 small ubiquitin-related modifier (A)	Small ubiquitin-related modifier 1 OS=Arabidopsis thaliana GN=SUMO1 PE=1 SV=2	Ubiquitin-2 like Rad60 SUMO-like
BnaA10T0027700WE	-0.0398238	0.371067	-0.203427	0.0143297	-0.505629	0.00332832	-0.159055	0.0596664	-0.23917	0.0468015	-0.265221	0.072685	malate dehydrogenase, cytoplasmic 1-like; K00025 malate dehydrogenase [EC:1.1.1.37] (A)	Malate dehydrogenase, cytoplasmic 1 OS=Arabidopsis thaliana GN=MDH1 PE=1 SV=2	lactate/malate dehydrogenase, NAD binding domain
BnaC01T0067800WE	-0.0650236	0.131164	-0.460568	0.0228139	-0.502749	0.00525761	-0.160476	0.108698	-0.246896	0.00808474	-0.108825	0.133225	profilin-1; K05759 profilin (A)	Profilin-1 OS=Arabidopsis thaliana GN=PRO1 PE=1 SV=1	Profilin
BnaC01T0077300WE	-0.0277714	0.146932	-0.587975	0.0114974	-0.495278	0.00291807	-0.0751522	0.231466	-0.135023	0.0265308	-0.211246	0.068141	plasminogen activator inhibitor 1 RNA-binding protein-like; K13199 plasminogen activator inhibitor 1 RNA-binding protein (A)	--	Stm1
BnaA05T0304900WE	0.629976	0.0409558	-0.309252	0.0739782	-0.493339	0.147514	-0.0730073	0.284162	0.580809	0.177854	0.926735	0.0113108	hypothetical protein; K06965 protein pelota (A)	Reactive Intermediate Deaminase A, chloroplastic OS=Arabidopsis thaliana GN=RIDA PE=1 SV=1	Endoribonuclease L-PSP
BnaA01T0326600WE	-0.058505	0.342642	-0.23978	0.00707306	-0.488542	0.00404979	-0.104556	0.167518	0.19624	0.111918	-0.261412	0.0239195	40S ribosomal protein S19-1; K02966 small subunit ribosomal protein S19e (A)	40S ribosomal protein S19-1 OS=Arabidopsis thaliana GN=RPS19A PE=2 SV=1	Ubiquitin-2 like Rad60 SUMO-like
BnaC04T0539500WE	-1.63706	0.0209046	-0.38073	0.0141463	-0.480879	0.0324059	0.279734	0.369184	-0.693287	0.0195032	2.418	0.123436	RNA-binding protein CP29B, chloroplastic-like; K11294 nucleolin (A)	RNA-binding protein CP29B, chloroplastic OS=Arabidopsis thaliana GN=CP29B PE=1 SV=1	RNA recognition motif. (a.k.a. RRM, RBD, or RNP domain)
BnaC02T0087300WE	-0.0619457	0.189056	-0.635429	0.00548028	-0.47714	0.000628328	-0.166437	0.0356604	-0.0758337	0.0806284	-0.350776	0.0244913	elongation factor 1-beta 2; K03232 elongation factor 1-beta (A)	Elongation factor 1-beta 1 OS=Arabidopsis thaliana GN=At5g12110 PE=2 SV=2	EF-1 guanine nucleotide exchange domain
BnaC06T0139600WE	-0.302795	0.119836	-1.05173	0.00591405	-0.477024	0.0162541	-0.120123	0.232755	-0.10346	0.0800618	-0.258148	0.0221837	hypothetical protein; K02965 small subunit ribosomal protein S19 (A)	Glycine-rich RNA-binding protein 2, mitochondrial OS=Arabidopsis thaliana GN=RBG2 PE=1 SV=1	RNA recognition motif. (a.k.a. RRM, RBD, or RNP domain)
BnaA04T0150600WE	0.00532339	0.318586	-0.0893378	0.0830008	-0.476719	0.0102066	-0.122047	0.118703	0.066133	0.123216	-0.0468972	0.383458	leucine aminopeptidase 1; K01255 leucyl aminopeptidase [EC:3.4.11.1] (A)	Leucine aminopeptidase 1 OS=Arabidopsis thaliana GN=PM25 PE=1 SV=1	Cytosol aminopeptidase family, N-terminal domain
BnaA07T0149700WE	-0.0390978	0.339652	-1.07244	0.00294328	-0.47496	0.1108	-0.283246	0.0044852	-0.213463	0.163803	-0.184304	0.258292	60S acidic ribosomal protein P2-2-like; K02943 large subunit ribosomal protein LP2 (A)	60S acidic ribosomal protein P2-1 OS=Arabidopsis thaliana GN=RPP2A PE=2 SV=2	60s Acidic ribosomal protein
BnaA03T0192900WE	-0.078073	0.295079	-0.160664	0.0660022	-0.472304	0.0200813	-0.488296	0.00439883	0.0666991	0.347795	-0.170419	0.0841333	mediator of RNA polymerase II transcription subunit 37f-like; K09490 heat shock 70kDa protein 5 (A)	Mediator of RNA polymerase II transcription subunit 37f OS=Arabidopsis thaliana GN=MED37F PE=1 SV=2	Hsp70 protein
BnaC08T0482100WE	-0.0193393	0.213862	-0.488325	0.00234099	-0.471304	0.00766157	-0.140105	0.244441	-0.0359249	0.367888	-0.197011	0.0853792	ran-binding protein 1 homolog a-like; K15306 Ran-binding protein 1 (A)	Ran-binding protein 1 homolog a OS=Arabidopsis thaliana GN=RANBP1A PE=1 SV=1	RanBP1 domain
BnaC03T0205800WE	0.252167	0.040798	-0.130209	0.106142	-0.464524	0.00869402	-0.295395	0.15272	-0.0512527	0.38823	0.233259	0.0480476	protein disulfide-isomerase like 2-1; K09584 protein disulfide-isomerase A6 [EC:5.3.4.1] (A)	Protein disulfide-isomerase like 2-1 OS=Arabidopsis thaliana GN=PDIL2-1 PE=2 SV=1	Endoplasmic reticulum protein ERp29, C-terminal domain
BnaA04T0035500WE	0.140241	0.14221	0.148932	0.139412	-0.460806	0.000424312	-0.0432584	0.294886	-0.388082	0.0176026	0.198411	0.0202701	heat shock 70 kDa protein 15; K09489 heat shock 70kDa protein 4 (A)	Heat shock 70 kDa protein 15 OS=Arabidopsis thaliana GN=HSP70-15 PE=1 SV=1	Hsp70 protein
BnaA09T0142400WE	0.16059	0.104205	-0.888293	0.0357248	-0.442999	0.0638791	-0.0158867	0.348406	-0.229736	0.138952	0.0604903	0.364486	mitochondrial import inner membrane translocase subunit TIM9; K17777 mitochondrial import inner membrane translocase subunit TIM9 (A)	Mitochondrial import inner membrane translocase subunit TIM9 OS=Arabidopsis thaliana GN=TIM9 PE=1 SV=2	Tim10/DDP family zinc finger
BnaC07T0253100WE	0.157089	0.0492851	-0.705426	0.0221778	-0.44138	0.00397351	-0.148182	0.0355591	0.148828	0.0835249	-0.1131	0.171437	plasminogen activator inhibitor 1 RNA-binding protein-like; K13199 plasminogen activator inhibitor 1 RNA-binding protein (A)	--	Stm1
BnaC09T0175200WE	-0.241866	0.0522121	-0.884123	0.00704015	-0.437194	0.00854332	0.0855243	0.224405	0.155886	0.150701	-0.297558	0.215437	--	--	--
BnaA07T0302500WE	-0.100777	0.227645	-0.86057	0.0270559	-0.435047	0.0429427	-0.824209	0.0802853	0.00728208	0.24231	-0.566435	0.0290932	eukaryotic translation initiation factor 5A-3; K03263 translation initiation factor 5A (A)	Eukaryotic translation initiation factor 5A-3 OS=Arabidopsis thaliana GN=ELF5A-3 PE=2 SV=1	KOW motif
BnaA02T0166100WE	-0.49119	0.053261	-0.428429	0.123677	-0.418674	0.0374561	0.666478	0.0019889	-0.193844	0.088173	-0.183472	0.0243478	60S ribosomal protein L17-2; K02880 large subunit ribosomal protein L17e (A)	60S ribosomal protein L17-2 OS=Arabidopsis thaliana GN=RPL17B PE=2 SV=2	Ribosomal protein L22p/L17e
BnaA04T0040300WE	0.0538581	0.231164	0.289912	0.0543929	-0.415884	0.0156423	0.0797605	0.243951	0.0642635	0.128848	-0.273586	0.0586872	60S ribosomal protein L23a-2-like; K02893 large subunit ribosomal protein L23Ae (A)	60S ribosomal protein L23a OS=Daucus carota GN=RPL23A PE=2 SV=1	Ribosomal protein L23, N-terminal domain
BnaC09T0143100WE	-0.203604	0.24306	-0.501058	0.101686	-0.409711	0.00967762	0.447434	0.322101	-0.0173285	0.165603	0.0292283	0.0244438	hsp70-Hsp90 organizing protein 2; K09553 stress-induced-phosphoprotein 1 (A)	Hsp70-Hsp90 organizing protein 2 OS=Arabidopsis thaliana GN=HOP2 PE=1 SV=1	Tetratricopeptide repeat
BnaA07T0187900WE	0.154166	0.229182	-0.427014	0.0184439	-0.40513	0.0779199	-0.757437	0.0571352	0.677609	0.0110671	-0.365145	0.0494096	copper transport protein CCH; K07213 copper chaperone (A)	Copper transport protein CCH OS=Arabidopsis thaliana GN=CCH PE=1 SV=1	Heavy-metal-associated domain
BnaA06T0019600WE	0.278882	0.241733	0.00741519	0.217265	-0.404753	0.054164	-0.151643	0.150553	0.562026	0.0361085	0.0882759	0.386302	disease resistance protein RPM1-like; K13457 disease resistance protein RPM1 (A)	Jacalin-related lectin 15 OS=Arabidopsis thaliana GN=JAL15 PE=2 SV=1	Jacalin-like lectin domain
BnaA09T0659400WE	-0.0277074	0.368647	-0.582136	0.0123235	-0.403077	0.027872	0.121378	0.34561	-0.149454	0.309823	-0.0749571	0.207597	60S acidic ribosomal protein P1-2; K02942 large subunit ribosomal protein LP1 (A)	60S acidic ribosomal protein P1-2 OS=Arabidopsis thaliana GN=RPP1B PE=1 SV=2	60s Acidic ribosomal protein
BnaA03T0098900WE	-0.346797	0.00597455	-0.734981	0.00304524	-0.399958	0.000950989	0.0538791	0.192625	-0.0249807	0.143319	-0.288425	0.0115448	elongation factor 1-beta 2-like; K03232 elongation factor 1-beta (A)	Elongation factor 1-beta 1 OS=Arabidopsis thaliana GN=At5g12110 PE=2 SV=2	EF-1 guanine nucleotide exchange domain
BnaA09T0609800WE	-0.249065	0.135072	-0.179895	0.0469893	-0.396476	0.014511	-0.590655	0.0611787	-0.190535	0.0119926	-0.814677	0.0776118	--	--	Plant specific eukaryotic initiation factor 4B
BnaA07T0105900WE	0.0284016	0.341284	-0.695382	0.0112864	-0.395157	0.03092	-1.07323	0.102433	0.227493	0.0129381	-0.0381129	0.293743	T24P13.4; K15151 mediator of RNA polymerase II transcription subunit 10 (A)	Mediator of RNA polymerase II transcription subunit 10b OS=Arabidopsis thaliana GN=MED10B PE=1 SV=1	Prefoldin subunit
BnaA08T0295900WE	-0.06598	0.206813	-0.0182643	0.276548	-0.392405	0.0103465	-0.184999	0.021869	0.0186693	0.38731	-0.34662	0.0207313	Os03g0332500; K02866 large subunit ribosomal protein L10e (A)	Acid phosphatase 1 OS=Solanum lycopersicum GN=APS1 PE=2 SV=1	HAD superfamily, subfamily IIIB (Acid phosphatase)
BnaC02T0508100WE	0.0833292	0.317784	-0.3345	0.00173462	-0.392361	0.00203066	-0.351958	0.0971079	-0.0570079	0.205739	0.0153366	0.256637	calnexin homolog 1-like; K08054 calnexin (A)	Calnexin homolog 1 OS=Arabidopsis thaliana GN=CNX1 PE=1 SV=1	Calreticulin family
BnaC08T0397800WE	-0.305581	0.066292	-0.524744	0.0224288	-0.392347	0.0169503	-0.0836906	0.179912	0.499102	0.0092103	0.00311281	0.233568	uncharacterized LOC100305467; K13195 cold-inducible RNA-binding protein (A)	Glycine-rich RNA-binding protein GRP1A OS=Sinapis alba PE=2 SV=1	RNA recognition motif. (a.k.a. RRM, RBD, or RNP domain)
BnaA03T0339100WE	-0.0907479	0.0599777	-0.38563	0.0158365	-0.391085	0.00325088	0.194202	0.165974	-0.055648	0.0210436	-0.147882	0.118939	nascent polypeptide-associated complex subunit alpha-like protein 1; K03626 nascent polypeptide-associated complex subunit alpha (A)	Nascent polypeptide-associated complex subunit alpha-like protein 1 OS=Arabidopsis thaliana GN=At3g12390 PE=1 SV=1	NAC domain
BnaA02T0310600WE	0.0751196	0.177182	-0.103539	0.0373723	-0.390251	0.00746129	-0.17731	0.0459594	-0.0706374	0.282114	-0.0904077	0.0407958	probable fructose-bisphosphate aldolase 3, chloroplastic; K01623 fructose-bisphosphate aldolase, class I [EC:4.1.2.13] (A)	Probable fructose-bisphosphate aldolase 3, chloroplastic OS=Arabidopsis thaliana GN=FBA3 PE=1 SV=1	Fructose-bisphosphate aldolase class-I
BnaA08T0176400WE	-0.0428062	0.294216	-0.544227	0.033263	-0.389773	0.0202678	0.097208	0.183183	0.174896	0.154982	-0.104797	0.232117	glycine-rich RNA-binding family protein; K13195 cold-inducible RNA-binding protein (A)	Glycine-rich RNA-binding protein 10 OS=Brassica napus GN=GRP10 PE=2 SV=1	RNA recognition motif. (a.k.a. RRM, RBD, or RNP domain)
BnaA06T0394200WE	0.0640466	0.370482	-0.619889	0.0343184	-0.385861	0.0813809	-0.100185	0.177917	0.161926	0.112944	-0.192494	0.0869116	peptidyl-prolyl cis-trans isomerase FKBP15-2; K09569 FK506-binding protein 2 [EC:5.2.1.8] (A)	Peptidyl-prolyl cis-trans isomerase FKBP15-2 OS=Arabidopsis thaliana GN=FKBP15-2 PE=2 SV=2	FKBP-type peptidyl-prolyl cis-trans isomerase
BnaC08T0106800WE	-0.0647191	0.0190592	-0.801068	0.0145694	-0.384969	0.00229507	-0.0797299	0.183272	0.229433	0.382018	-0.547112	0.326645	probable H/ACA ribonucleoprotein complex subunit 1; K13199 plasminogen activator inhibitor 1 RNA-binding protein (A)	--	Stm1
BnaC06T0352500WE	0.05681	0.353262	-0.432414	0.00577023	-0.38323	0.0240402	-0.294883	0.064215	0.101775	0.0154861	-0.224129	0.0659812	decapping nuclease DXO homolog, chloroplastic-like; K14845 RAT1-interacting protein (A)	Protein-lysine N-methyltransferase METTL10 OS=Homo sapiens GN=METTL10 PE=1 SV=2	Methyltransferase domain
BnaA04T0169100WE	-0.185644	0.111516	-1.13815	0.0030188	-0.383073	0.022948	-0.42377	0.0706339	-0.377555	0.060895	-0.156009	0.193446	60S acidic ribosomal protein P2-2-like; K02943 large subunit ribosomal protein LP2 (A)	60S acidic ribosomal protein P2-1 OS=Arabidopsis thaliana GN=RPP2A PE=2 SV=2	60s Acidic ribosomal protein
BnaA08T0189100WE	0.0291112	0.223072	0.266899	0.373876	-0.368659	0.0288193	-1.24142	0.157394	0.337504	0.288166	-0.147966	0.14058	uncharacterized LOC103329149; K19307 25S rRNA (uracil2634-N3)-methyltransferase [EC:2.1.1.313] (A)	--	Protein of unknown function (DUF1296)
BnaA06T0012000WE	0.217466	0.118751	-0.588959	0.00645202	-0.358178	0.00677335	-0.47012	0.0631366	0.084281	0.126949	0.0534048	0.348433	malate dehydrogenase 1, mitochondrial-like; K00026 malate dehydrogenase [EC:1.1.1.37] (A)	Malate dehydrogenase 1, mitochondrial OS=Arabidopsis thaliana GN=At1g53240 PE=1 SV=1	lactate/malate dehydrogenase, NAD binding domain
BnaC01T0388300WE	-0.0772799	0.273491	-0.274113	0.0530523	-0.355873	0.00756939	-0.177992	0.147442	-0.301279	0.0082589	-0.101189	0.0899766	nascent polypeptide-associated complex subunit alpha-like protein 1; K03626 nascent polypeptide-associated complex subunit alpha (A)	Nascent polypeptide-associated complex subunit alpha-like protein 1 OS=Arabidopsis thaliana GN=At3g12390 PE=1 SV=1	NAC domain
BnaC04T0301300WE	0.299309	0.0941944	-0.749002	0.31568	-0.352861	0.0210845	1.93857	0.227319	0.255591	0.307358	-0.23358	0.235845	copper transport protein CCH-like; K07213 copper chaperone (A)	Copper transport protein CCH OS=Arabidopsis thaliana GN=CCH PE=1 SV=1	Heavy-metal-associated domain
BnaC07T0147700WE	0.198147	0.0288243	0.113326	0.080477	-0.350572	0.00139298	-0.0432294	0.282406	0.0340352	0.27064	-0.0814436	0.205816	pyruvate dehydrogenase E1 component subunit alpha-2, mitochondrial; K00161 pyruvate dehydrogenase E1 component alpha subunit [EC:1.2.4.1] (A)	Pyruvate dehydrogenase E1 component subunit alpha-2, mitochondrial OS=Arabidopsis thaliana GN=IAR4 PE=1 SV=2	Dehydrogenase E1 component
BnaC07T0399800WE	0.0643106	0.177767	-0.233529	0.121565	-0.350343	0.125046	-0.156755	0.3766	-0.409575	0.0236198	-0.00264256	0.338602	endoplasmin homolog; K09487 heat shock protein 90kDa beta (A)	Endoplasmin homolog OS=Arabidopsis thaliana GN=SHD PE=1 SV=1	Histidine kinase-, DNA gyrase B-, and HSP90-like ATPase
BnaC01T0373300WE	-0.0600658	0.299175	-0.370461	0.0448574	-0.343898	0.0266714	-0.197988	0.0632208	0.182404	0.0324099	-0.0846903	0.14187	3-ketoacyl-CoA synthase 9; K15397 3-ketoacyl-CoA synthase [EC:2.3.1.199] (A)	Polyadenylate-binding protein-interacting protein 4 OS=Arabidopsis thaliana GN=CID4 PE=2 SV=1	Ataxin-2 C-terminal region
BnaA09T0143500WE	0.0772142	0.225162	-0.56679	0.0126735	-0.342873	0.000982856	-0.257337	0.00634052	0.0293862	0.369212	-0.0746254	0.0881714	hsp70-Hsp90 organizing protein 2; K09553 stress-induced-phosphoprotein 1 (A)	Hsp70-Hsp90 organizing protein 2 OS=Arabidopsis thaliana GN=HOP2 PE=1 SV=1	Tetratricopeptide repeat
BnaA04T0155800WE	-0.419386	0.0974146	-0.946774	0.00252295	-0.341144	0.00451541	0.081663	0.303555	0.317451	0.0882488	-0.272931	0.197156	probable steroid-binding protein 3; K17278 membrane-associated progesterone receptor component (A)	Probable steroid-binding protein 3 OS=Arabidopsis thaliana GN=MP3 PE=1 SV=1	Cytochrome b5-like Heme/Steroid binding domain
BnaA01T0140800WE	0.260827	0.134792	-0.220839	0.187016	-0.339283	0.0293672	-0.192117	0.0632005	-0.0806693	0.3838	0.590799	0.0552816	serine/threonine-protein phosphatase 2A 65 kDa regulatory subunit A beta isoform-like; K03456 serine/threonine-protein phosphatase 2A regulatory subunit A (A)	Fasciclin-like arabinogalactan protein 2 OS=Arabidopsis thaliana GN=FLA2 PE=1 SV=1	Fasciclin domain
BnaC05T0173500WE	-0.0680884	0.0500373	-0.148713	0.0668052	-0.337809	0.0110244	-0.419527	0.0223495	0.259746	0.0483366	-0.00373124	0.378479	--	Proton pump-interactor 1 OS=Arabidopsis thaliana GN=PPI1 PE=1 SV=2	--
BnaA08T0182400WE	-0.314909	0.0927929	-0.587082	0.0622857	-0.33306	0.0756046	0.30253	0.233	0.253586	0.0274307	-0.163288	0.0529141	heterogeneous nuclear ribonucleoprotein 1-like; K14411 RNA-binding protein Musashi (A)	Heterogeneous nuclear ribonucleoprotein 1 OS=Arabidopsis thaliana GN=RNP1 PE=1 SV=1	RNA recognition motif. (a.k.a. RRM, RBD, or RNP domain)
BnaA03T0233900WE	0.0754165	0.131126	0.0683962	0.1315	-0.332369	0.0605957	-0.578173	0.0548695	0.0363342	0.149315	-0.219042	0.027632	40S ribosomal protein S27-2; K02978 small subunit ribosomal protein S27e (A)	40S ribosomal protein S27-2 OS=Arabidopsis thaliana GN=RPS27B PE=2 SV=2	Ribosomal protein S27
BnaA05T0115100WE	-0.178072	0.158078	-1.04129	0.00342447	-0.330005	0.0406341	-0.14418	0.121072	0.0727077	0.307223	-0.292066	0.0137069	--	--	--
BnaA10T0128100WE	-0.595156	0.106353	-1.58154	0.004325	-0.32944	0.0390056	0.115529	0.31631	-0.602641	0.0347081	0.0316129	0.309804	60S acidic ribosomal protein P3-2; K02942 large subunit ribosomal protein LP1 (A)	60S acidic ribosomal protein P3-2 OS=Arabidopsis thaliana GN=RPP3B PE=2 SV=1	60s Acidic ribosomal protein
BnaC08T0372200WE	0.1985	0.140308	-0.104807	0.219302	-0.324752	0.204767	-0.401981	0.166468	0.398952	0.286321	0.798195	0.0223335	far upstream element-binding protein 1-like; K13210 far upstream element-binding protein (A)	Far upstream element-binding protein 1 OS=Homo sapiens GN=FUBP1 PE=1 SV=3	KH domain
BnaA03T0169900WE	-0.00933719	0.38603	-0.858923	0.00686488	-0.315542	0.0386053	0.0283181	0.201934	0.0806431	0.0562368	0.185678	0.142787	--	Laminin subunit alpha-2 OS=Homo sapiens GN=LAMA2 PE=1 SV=4	--
BnaA09T0549700WE	-0.16285	0.112276	-0.0149544	0.380561	-0.313837	0.00257752	-0.377363	0.103492	-0.211205	0.0928681	-0.250508	0.0185003	leucine aminopeptidase 1-like; K01255 leucyl aminopeptidase [EC:3.4.11.1] (A)	Leucine aminopeptidase 1 OS=Arabidopsis thaliana GN=PM25 PE=1 SV=1	Cytosol aminopeptidase family, N-terminal domain
BnaC07T0416300WE	0.173575	0.0330764	-0.48989	0.0442488	-0.307714	0.0591241	0.160149	0.242621	0.186726	0.202343	-0.179351	0.166619	protein GrpE-like; K03687 molecular chaperone GrpE (A)	Protein GrpE OS=Rhodopseudomonas palustris (strain ATCC BAA-98 / CGA009) GN=grpE PE=3 SV=2	GrpE
BnaA09T0571300WE	0.20467	0.129707	-0.746478	0.018774	-0.30317	0.0129411	0.365265	0.130453	-0.0901262	0.368438	-0.09102	0.0996511	clathrin light chain 2-like; K04645 clathrin light chain B (A)	Clathrin light chain 1 OS=Arabidopsis thaliana GN=At2g20760 PE=2 SV=1	Clathrin light chain
BnaA09T0140200WE	0.576288	0.0180753	-0.669392	0.0221826	-0.300971	0.0232645	0.254551	0.254994	0.0168444	0.247561	0.500098	0.00394154	triosephosphate isomerase, cytosolic; K01803 triosephosphate isomerase (TIM) [EC:5.3.1.1] (A)	C2 domain-containing protein At1g63220 OS=Arabidopsis thaliana GN=At1g63220 PE=1 SV=1	C2 domain
BnaA09T0582700WE	0.0485673	0.236113	-0.305312	0.0780309	-0.297553	0.0315614	-0.359562	0.0753716	0.175321	0.0190196	-0.155391	0.277808	eukaryotic peptide chain release factor GTP-binding subunit ERF3A-like; K03267 peptide chain release factor subunit 3 (A)	Eukaryotic peptide chain release factor GTP-binding subunit ERF3B OS=Homo sapiens GN=GSPT2 PE=1 SV=2	Elongation factor Tu domain 2
BnaA04T0168300WE	0.218937	0.0713115	-0.896251	0.0145637	-0.295383	0.0632164	-0.117333	0.201705	-0.0188999	0.133185	-0.0253846	0.341697	ferredoxin, root R-B2; K02639 ferredoxin (A)	Ferredoxin-3, chloroplastic OS=Arabidopsis thaliana GN=FD3 PE=1 SV=1	2Fe-2S iron-sulfur cluster binding domain
BnaC08T0198600WE	-0.171895	0.0322109	-1.10422	0.00157403	-0.285512	0.0476004	-2.11977	0.178902	0.288134	0.209301	-0.590838	0.0221601	transcription factor BTF3 homolog 4-like; K01527 nascent polypeptide-associated complex subunit beta (A)	Putative GDP-L-fucose synthase 2 OS=Arabidopsis thaliana GN=GER2 PE=1 SV=1	NAC domain
BnaA01T0059700WE	-0.0759464	0.0127948	-0.0344428	0.131396	-0.28367	0.00429871	0.0823834	0.0954094	0.00539479	0.225769	0.0637117	0.116069	endoplasmin homolog; K09487 heat shock protein 90kDa beta (A)	Endoplasmin homolog OS=Arabidopsis thaliana GN=SHD PE=1 SV=1	Histidine kinase-, DNA gyrase B-, and HSP90-like ATPase
BnaA10T0016100WE	0.0932887	0.137622	-0.497029	0.0515264	-0.280719	0.0486084	-0.602576	0.0752769	-0.0940854	0.255495	0.120515	0.168134	uncharacterized protein OsI_027940-like; K15730 cytosolic prostaglandin-E synthase [EC:5.3.99.3] (A)	Uncharacterized protein OsI_027940 OS=Oryza sativa subsp. indica GN=OsI_027940 PE=1 SV=2	CS domain
BnaA02T0264000WE	-0.645766	0.0167355	-0.250426	0.0445774	-0.278767	0.0278211	-0.354333	0.0556019	-0.0541391	0.327076	-0.419861	0.0171307	nucleoporin GLE1; K02988 small subunit ribosomal protein S5 (A)	30S ribosomal protein S5 OS=Alteromonas macleodii (strain DSM 17117 / Deep ecotype) GN=rpsE PE=3 SV=1	Ribosomal protein S5, N-terminal domain
BnaC03T0075500WE	0.265373	0.253911	-0.151038	0.0453035	-0.270899	0.0492327	-0.573284	0.0680729	0.145518	0.0966935	-0.0631536	0.0989641	heat shock protein 90-2-like; K04079 molecular chaperone HtpG (A)	Heat shock protein 90-4 OS=Arabidopsis thaliana GN=HSP90-4 PE=2 SV=1	Histidine kinase-, DNA gyrase B-, and HSP90-like ATPase
BnaC02T0308500WE	-0.116005	0.0960161	-0.0619754	0.281608	-0.270517	0.0211785	-0.619736	0.0562957	-0.129186	0.0755311	-0.0363668	0.096719	phosphoglycerate kinase, cytosolic-like; K00927 phosphoglycerate kinase [EC:2.7.2.3] (A)	Phosphoglycerate kinase, cytosolic OS=Nicotiana tabacum PE=2 SV=1	Phosphoglycerate kinase
BnaA10T0189800WE	-1.14637	0.149709	0.038306	0.111118	-0.270332	0.0163041	0.0675694	0.250267	0.171363	0.253219	0.240786	0.255843	hypothetical protein; K05527 BolA protein (A)	Protein BOLA4, chloroplastic/mitochondrial OS=Arabidopsis thaliana GN=BOLA4 PE=1 SV=1	BolA-like protein
BnaA08T0253000WE	0.0148256	0.113362	-0.359446	0.0299915	-0.269903	0.251993	-0.419471	0.057916	-0.0120211	0.348445	0.104616	0.172628	allene oxide cyclase 4, chloroplastic; K10525 allene oxide cyclase [EC:5.3.99.6] (A)	Allene oxide cyclase 4, chloroplastic OS=Arabidopsis thaliana GN=AOC4 PE=2 SV=1	Allene oxide cyclase
BnaC05T0101300WE	0.373168	0.0285924	-0.579961	0.0572858	-0.249193	0.0654623	0.122744	0.336251	0.344488	0.00682754	-0.112074	0.357058	--	--	--
BnaA06T0145200WE	-0.0438071	0.156897	-0.421739	0.0291024	-0.244703	0.0464277	-0.363401	0.069694	0.257776	0.0453746	-0.0731925	0.282379	--	Proton pump-interactor 1 OS=Arabidopsis thaliana GN=PPI1 PE=1 SV=2	--
BnaA10T0289800WE	-0.169981	0.180059	-0.738576	0.00702905	-0.225191	0.0642588	-0.18809	0.0479777	-0.140515	0.259552	-0.227202	0.0834854	probable mediator of RNA polymerase II transcription subunit 37e; K03283 heat shock 70kDa protein 1/8 (A)	Probable mediator of RNA polymerase II transcription subunit 37e OS=Arabidopsis thaliana GN=MED37E PE=1 SV=3	Hsp70 protein
BnaA01T0181600WE	-0.084878	0.128214	-0.0309865	0.113266	-0.22488	0.0327675	-0.0254354	0.0998237	-0.0619657	0.0884596	0.0289004	0.296489	probable mediator of RNA polymerase II transcription subunit 37e; K03283 heat shock 70kDa protein 1/8 (A)	Probable mediator of RNA polymerase II transcription subunit 37e OS=Arabidopsis thaliana GN=MED37E PE=1 SV=3	Hsp70 protein
BnaA03T0113600WE	-0.147709	0.0142674	0.0585124	0.245306	-0.224592	0.0322479	-0.0020416	0.376896	-0.132746	0.0495335	-0.053963	0.137657	elongation factor 1-alpha 1-like; K03231 elongation factor 1-alpha (A)	Elongation factor 1-alpha 4 OS=Arabidopsis thaliana GN=A4 PE=1 SV=2	Elongation factor Tu domain 2
BnaC01T0354500WE	0.131291	0.222408	0.125292	0.244028	-0.221627	0.0703765	-0.99923	0.0206247	-0.090631	0.130975	-0.311122	0.0292369	--	PYK10-binding protein 2 OS=Arabidopsis thaliana GN=PBP2 PE=1 SV=1	Jacalin-like lectin domain
BnaA01T0007000WE	-0.223434	0.0697247	-0.585586	0.0165348	-0.212665	0.121099	0.182889	0.245782	-0.0334597	0.11565	-0.584098	0.0514437	plasminogen activator inhibitor 1 RNA-binding protein-like; K13199 plasminogen activator inhibitor 1 RNA-binding protein (A)	--	Stm1
BnaA10T0277600WE	-0.121214	0.0566993	-0.125841	0.0999992	-0.211115	0.00102034	-0.0192983	0.15983	-0.0324354	0.315851	-0.162574	0.0217924	protein BTR1; K14944 RNA-binding protein Nova (A)	Protein BTR1 OS=Arabidopsis thaliana GN=BTR1 PE=1 SV=1	KH domain
BnaA09T0013600WE	-0.235308	0.0889393	-0.123811	0.201328	-0.208986	0.0493481	0.518068	0.0422637	0.145044	0.104734	-0.123802	0.104171	S-adenosylmethionine synthase; K00789 S-adenosylmethionine synthetase [EC:2.5.1.6] (A)	S-adenosylmethionine synthase OS=Brassica rapa subsp. pekinensis GN=SAMS PE=2 SV=1	S-adenosylmethionine synthetase, N-terminal domain
BnaA07T0064000WE	0.113168	0.222845	-0.641638	0.00582999	-0.208729	0.0517973	-0.464955	0.0716098	-0.529937	0.0274972	-0.499973	0.0405798	BiP; mediator of RNA polymerase II transcription subunit 37f; K09490 heat shock 70kDa protein 5 (A)	Mediator of RNA polymerase II transcription subunit 37f OS=Arabidopsis thaliana GN=MED37F PE=1 SV=2	Hsp70 protein
BnaC02T0096800WE	0.0125255	0.271973	-0.261284	0.136143	-0.20774	0.349909	-0.421762	0.058661	0.202434	0.0211849	-0.0421172	0.339567	20 kDa chaperonin, chloroplastic; K04078 chaperonin GroES (A)	20 kDa chaperonin, chloroplastic OS=Arabidopsis thaliana GN=CPN21 PE=1 SV=2	Chaperonin 10 Kd subunit
BnaA02T0088400WE	-0.0404152	0.291536	-0.150798	0.0207493	-0.207484	0.01145	-0.324131	0.0191522	-0.234122	0.0145299	-0.0832324	0.125871	eukaryotic translation initiation factor 2 subunit beta; K03238 translation initiation factor 2 subunit 2 (A)	Eukaryotic translation initiation factor 2 subunit beta OS=Arabidopsis thaliana GN=EMB1401 PE=1 SV=3	Domain found in IF2B/IF5
BnaC01T0256600WE	-0.0507784	0.342892	-0.681181	0.0296201	-0.207254	0.0220112	-0.485284	0.0100229	0.0722412	0.204901	-0.180451	0.0633276	hypothetical protein; K08057 calreticulin (A)	Calreticulin-1 OS=Arabidopsis thaliana GN=CRT1 PE=1 SV=1	Calreticulin family
BnaA09T0254100WE	0.033438	0.202558	-0.723562	0.0154748	-0.205856	0.0516089	-0.635911	0.0564949	-0.173665	0.0346154	-0.0600938	0.297545	sapx; L-ascorbate peroxidase S, chloroplastic/mitochondrial; K00434 L-ascorbate peroxidase [EC:1.11.1.11] (A)	L-ascorbate peroxidase S, chloroplastic/mitochondrial OS=Arabidopsis thaliana GN=APXS PE=1 SV=2	Peroxidase
BnaC04T0178500WE	0.632831	0.00684683	-0.854635	0.00366289	-0.205358	0.0459834	0.235555	0.132921	0.0688905	0.241632	-0.440513	0.0102774	mitochondrial import inner membrane translocase subunit TIM10-like; K17778 mitochondrial import inner membrane translocase subunit TIM10 (A)	Mitochondrial import inner membrane translocase subunit TIM10 OS=Arabidopsis thaliana GN=TIM10 PE=1 SV=1	Tim10/DDP family zinc finger
BnaC07T0186300WE	0.262038	0.178407	-0.191434	0.0704509	-0.203892	0.0623307	0.29431	0.177288	-0.0514523	0.103462	0.220124	0.0486309	ras GTPase-activating protein-binding protein 1; K17265 Ras GTPase-activating protein-binding protein 1 [EC:3.6.4.12 3.6.4.13] (A)	Putative G3BP-like protein OS=Schizosaccharomyces pombe (strain 972 / ATCC 24843) GN=nxt3 PE=1 SV=1	-
BnaA06T0010600WE	0.0463749	0.24515	-0.0326428	0.128923	-0.199944	0.00935811	-0.14559	0.0239658	-0.0302235	0.0627968	0.0139107	0.318264	heat shock 70 kDa protein 14; K09489 heat shock 70kDa protein 4 (A)	Heat shock 70 kDa protein 14 OS=Arabidopsis thaliana GN=HSP70-14 PE=2 SV=1	Hsp70 protein
BnaA03T0175300WE	-0.0773389	0.0658491	-0.0309046	0.152172	-0.196635	0.0138189	-0.0360175	0.15348	-0.000368132	0.370993	-0.084917	0.0470081	chaperonin CPN60, mitochondrial; K04077 chaperonin GroEL (A)	Chaperonin CPN60, mitochondrial OS=Brassica napus PE=2 SV=1	TCP-1/cpn60 chaperonin family
BnaC03T0584100WE	0.297044	0.345269	-0.771393	0.0328148	-0.196449	0.0810739	-0.600795	0.041007	-0.0878188	0.192387	-1.28846	0.0505441	RNA-binding protein FUS-like; K13098 RNA-binding protein FUS (A)	Glycine-rich RNA-binding protein 8 OS=Arabidopsis thaliana GN=RBG8 PE=1 SV=1	RNA recognition motif. (a.k.a. RRM, RBD, or RNP domain)
BnaA10T0155700WE	-0.125439	0.0106572	-0.412925	0.0160613	-0.193581	0.0406777	-0.022573	0.268786	-0.0955588	0.0710136	0.0530937	0.260681	protein disulfide isomerase-like 1-4; K09580 protein disulfide-isomerase A1 [EC:5.3.4.1] (A)	Protein disulfide isomerase-like 1-4 OS=Arabidopsis thaliana GN=PDIL1-4 PE=1 SV=1	Thioredoxin-like domain
BnaA06T0395000WE	-0.823362	0.00637394	-0.221665	0.0179324	-0.19141	0.208379	0.172379	0.256758	0.267006	0.155105	-0.0135497	0.319439	--	Uncharacterized protein At5g48480 OS=Arabidopsis thaliana GN=At5g48480 PE=1 SV=1	Glyoxalase-like domain
BnaA03T0410600WE	-0.0896327	0.336443	-0.288204	0.00947071	-0.189415	0.110554	-0.219622	0.0814509	-0.0935255	0.232107	-0.0071422	0.313371	probable mediator of RNA polymerase II transcription subunit 37e; K03283 heat shock 70kDa protein 1/8 (A)	Probable mediator of RNA polymerase II transcription subunit 37e OS=Arabidopsis thaliana GN=MED37E PE=1 SV=3	Hsp70 protein
BnaC06T0195100WE	-0.197283	0.0419868	0.0099343	0.344816	-0.184885	0.0256166	0.13604	0.0877029	0.0200602	0.240859	-0.198491	0.103304	heat shock 70 kDa protein 17-like; K09486 hypoxia up-regulated 1 (A)	Heat shock 70 kDa protein 17 OS=Arabidopsis thaliana GN=HSP70-17 PE=2 SV=1	Hsp70 protein
BnaA10T0031600WE	-0.031519	0.111861	-0.146984	0.0294077	-0.183279	0.029581	0.244671	0.127114	0.150309	0.160834	-0.371713	0.0191192	ubiquitin carboxyl-terminal hydrolase 2-like; K11844 ubiquitin carboxyl-terminal hydrolase 16/45 [EC:3.4.19.12] (A)	UBX domain-containing protein 1 OS=Xenopus tropicalis GN=ubxn1 PE=2 SV=1	UBA/TS-N domain
BnaA01T0285700WE	-0.349315	0.0907948	-0.0102059	0.278795	-0.182608	0.0274847	0.593725	0.0147046	-0.139914	0.329436	0.376854	0.176085	lysine--tRNA ligase; K04567 lysyl-tRNA synthetase, class II [EC:6.1.1.6] (A)	Lysine--tRNA ligase, cytoplasmic OS=Arabidopsis thaliana GN=At3g11710 PE=1 SV=1	OB-fold nucleic acid binding domain
BnaA07T0239700WE	0.214568	0.147102	-0.661685	0.0224524	-0.180826	0.216815	-0.29526	0.144216	-0.0797691	0.11806	0.228001	0.0395816	SKP1-like protein 1A; K03094 S-phase kinase-associated protein 1 (A)	SKP1-like protein 1A OS=Arabidopsis thaliana GN=SKP1A PE=1 SV=1	Skp1 family, tetramerisation domain
BnaA02T0058200WE	-0.0220114	0.115707	0.0434021	0.362085	-0.180314	0.119866	-0.0665024	0.0554074	-0.259022	0.0157112	-0.081435	0.110999	40S ribosomal protein S9-1; K02997 small subunit ribosomal protein S9e (A)	40S ribosomal protein S9-1 OS=Arabidopsis thaliana GN=RPS9B PE=1 SV=1	S4 domain
BnaC07T0157500WE	0.347663	0.0617991	-0.786072	0.0150779	-0.179817	0.301752	-0.127973	0.0971204	0.0626776	0.282554	0.094208	0.279204	cytochrome c oxidase subunit 6b-1-like; K02267 cytochrome c oxidase subunit 6b (A)	Cytochrome c oxidase subunit 6b-1 OS=Arabidopsis thaliana GN=COX6B-1 PE=1 SV=1	Cytochrome oxidase c subunit VIb
BnaA01T0054800WE	0.313576	0.0153624	-0.55822	0.0979103	-0.164243	0.327306	-0.388831	0.0453648	-0.0706317	0.296529	0.177088	0.171012	--	MLP-like protein 328 OS=Arabidopsis thaliana GN=MLP328 PE=2 SV=1	Pathogenesis-related protein Bet v I family
BnaA05T0440000WE	0.0363666	0.198935	-0.643839	0.0100245	-0.161623	0.212179	0.173255	0.00731312	-0.10887	0.126409	0.138624	0.10118	14-3-3-like protein GF14 nu; K06630 14-3-3 protein epsilon (A)	14-3-3-like protein GF14 nu OS=Arabidopsis thaliana GN=GRF7 PE=1 SV=1	14-3-3 protein
BnaA03T0306600WE	0.0742867	0.312979	0.0994183	0.0329887	-0.157105	0.15022	-0.586612	0.102801	-0.183057	0.031929	-0.0402586	0.365725	40S ribosomal protein S3a-2-like; K02984 small subunit ribosomal protein S3Ae (A)	40S ribosomal protein S3a-2 OS=Arabidopsis thaliana GN=RPS3AB PE=2 SV=3	Ribosomal S3Ae family
BnaC09T0070000WE	0.190335	0.0426275	-0.0577009	0.304497	-0.148723	0.143105	0.103872	0.18455	-0.150082	0.0570311	-0.175357	0.0817561	40S ribosomal protein S11; K02949 small subunit ribosomal protein S11e (A)	40S ribosomal protein S11-3 OS=Arabidopsis thaliana GN=RPS11C PE=2 SV=2	Remorin, N-terminal region
BnaA07T0279100WE	-0.0102281	0.164037	0.0507299	0.282225	-0.140529	0.0247932	0.0859256	0.0947297	0.0214679	0.360211	-0.146935	0.0136089	cytosolic isocitrate dehydrogenase [NADP]-like; K00031 isocitrate dehydrogenase [EC:1.1.1.42] (A)	Cytosolic isocitrate dehydrogenase [NADP] OS=Arabidopsis thaliana GN=CICDH PE=2 SV=1	Isocitrate/isopropylmalate dehydrogenase
BnaA08T0120600WE	0.0105215	0.210327	0.0342849	0.298987	-0.140215	0.0242914	0.110482	0.0540548	-0.0253892	0.387123	0.0184404	0.279759	polyadenylate-binding protein 2; K13126 polyadenylate-binding protein (A)	Polyadenylate-binding protein 2 OS=Arabidopsis thaliana GN=PAB2 PE=1 SV=1	Poly-adenylate binding protein, unique domain
BnaC07T0285800WE	0.133887	0.333428	0.328058	0.0880758	-0.138688	0.0194152	-0.155935	0.273765	0.286825	0.101603	-0.0401403	0.0579428	dihydrolipoyllysine-residue acetyltransferase component 3 of pyruvate dehydrogenase complex, mitochondrial; K00627 pyruvate dehydrogenase E2 component (dihydrolipoamide acetyltransferase) [EC:2.3.1.12] (A)	Dihydrolipoyllysine-residue acetyltransferase component 4 of pyruvate dehydrogenase complex, chloroplastic OS=Arabidopsis thaliana GN=LTA2 PE=2 SV=1	e3 binding domain
BnaA03T0389300WE	-0.0712052	0.147872	-0.0857526	0.0288008	-0.122278	0.0358145	0.022273	0.191989	-0.0901774	0.0470788	-0.0692744	0.0923571	chaperonin CPN60, mitochondrial; K04077 chaperonin GroEL (A)	Chaperonin CPN60, mitochondrial OS=Arabidopsis thaliana GN=CPN60 PE=2 SV=2	TCP-1/cpn60 chaperonin family
BnaA04T0016500WE	-0.0897444	0.208284	-0.0251677	0.0276902	-0.117922	0.382732	-0.27538	0.119905	-0.102455	0.19042	-0.288186	0.0269817	eukaryotic translation initiation factor 4G-like; K03260 translation initiation factor 4G (A)	Eukaryotic translation initiation factor 4G OS=Arabidopsis thaliana GN=EIF4G PE=1 SV=2	MA3 domain
BnaA06T0094400WE	-0.743908	0.0157117	0.0543391	0.326995	-0.117919	0.124304	-0.91227	0.178579	0.443348	0.0293702	-0.484204	0.0104174	valine--tRNA ligase-like; K01873 valyl-tRNA synthetase [EC:6.1.1.9] (A)	Valine--tRNA ligase, mitochondrial 1 OS=Arabidopsis thaliana GN=TWN2 PE=2 SV=2	Anticodon-binding domain of tRNA
BnaA02T0274900WE	-0.05484	0.317473	-0.0710078	0.333925	-0.117531	0.277187	-0.000373225	0.293259	-0.149972	0.0360787	-0.266835	0.0311913	60S ribosomal protein L3-1-like; K02925 large subunit ribosomal protein L3e (A)	60S ribosomal protein L3-1 OS=Arabidopsis thaliana GN=ARP1 PE=2 SV=5	Ribosomal protein L3
BnaA04T0062600WE	0.0396964	0.303518	-0.0392011	0.333147	-0.115033	0.0843367	0.410935	0.000755359	-0.0941367	0.0660854	0.076991	0.116793	adenosylhomocysteinase 1; K01251 adenosylhomocysteinase [EC:3.3.1.1] (A)	Adenosylhomocysteinase 1 OS=Arabidopsis thaliana GN=SAHH1 PE=1 SV=1	S-adenosyl-L-homocysteine hydrolase, NAD binding domain
BnaA07T0352700WE	-0.121019	0.00605848	-0.0139841	0.366806	-0.11382	0.0321615	-0.0973337	0.105397	0.0934031	0.0769396	-0.0742012	0.142812	26S proteasome non-ATPase regulatory subunit 3 homolog B; K03033 26S proteasome regulatory subunit N3 (A)	26S proteasome non-ATPase regulatory subunit 3 homolog A OS=Arabidopsis thaliana GN=RPN3A PE=1 SV=3	PCI domain
BnaA02T0138700WE	0.241651	0.156792	-0.949942	0.00458706	-0.108572	0.091559	-0.127072	0.311688	0.169358	0.0179052	-0.407843	0.0138566	hypothetical protein; K00326 cytochrome-b5 reductase [EC:1.6.2.2] (A)	Cytochrome b5 OS=Brassica oleracea var. botrytis GN=CYB5 PE=1 SV=1	Cytochrome b5-like Heme/Steroid binding domain
BnaA09T0635000WE	0.0881991	0.0426581	-0.667419	0.0129395	-0.102915	0.176465	0.290585	0.00197411	-0.0345749	0.231217	0.126291	0.156856	apx2; L-ascorbate peroxidase 1, cytosolic; K00434 L-ascorbate peroxidase [EC:1.11.1.11] (A)	L-ascorbate peroxidase 1, cytosolic OS=Arabidopsis thaliana GN=APX1 PE=1 SV=2	Peroxidase
BnaA02T0207000WE	-0.0547335	0.132049	0.254816	0.129944	-0.0983825	0.178866	-0.126315	0.0241362	-0.137111	0.0252126	-0.248256	0.00952448	60S ribosomal protein L6-3-like; K02934 large subunit ribosomal protein L6e (A)	60S ribosomal protein L6-3 OS=Arabidopsis thaliana GN=RPL6C PE=2 SV=1	Ribosomal protein L6, N-terminal domain
BnaC07T0426700WE	-0.124461	0.0294527	-0.0570951	0.224168	-0.0830189	0.0122644	-0.0586653	0.130398	-0.0659138	0.0771537	-0.00347588	0.199169	26S proteasome non-ATPase regulatory subunit 2 homolog A-like; K03028 26S proteasome regulatory subunit N1 (A)	26S proteasome non-ATPase regulatory subunit 2 homolog B OS=Arabidopsis thaliana GN=RPN1B PE=1 SV=1	Proteasome/cyclosome repeat
BnaA03T0272500WE	0.0224486	0.170305	-0.434348	0.087044	-0.081982	0.154219	-0.458997	0.0159813	0.0830987	0.0517196	0.0206247	0.0598806	plant UBX domain-containing protein 4; K14012 UBX domain-containing protein 1 (A)	Plant UBX domain-containing protein 4 OS=Arabidopsis thaliana GN=PUX4 PE=1 SV=1	UBX domain
BnaC08T0245200WE	0.0214245	0.190098	-0.568955	0.0137303	-0.0649625	0.256412	0.0411399	0.199719	-0.0793586	0.180134	0.176933	0.376833	membrane steroid-binding protein 2-like; K17278 membrane-associated progesterone receptor component (A)	Membrane steroid-binding protein 2 OS=Arabidopsis thaliana GN=MSBP2 PE=1 SV=1	Cytochrome b5-like Heme/Steroid binding domain
BnaC04T0271000WE	-0.196219	0.0110006	-0.136338	0.0554326	-0.0612395	0.15408	-0.298048	0.028346	0.126948	0.0924772	-0.18142	0.0397647	eukaryotic translation initiation factor 4G-like; K03260 translation initiation factor 4G (A)	Eukaryotic translation initiation factor 4G OS=Arabidopsis thaliana GN=EIF4G PE=1 SV=2	MA3 domain
BnaA02T0071800WE	-0.131233	0.253871	-0.113611	0.247767	-0.0466377	0.0769355	0.6277	0.000161402	-0.0864239	0.290687	-0.014755	0.374268	5-methyltetrahydropteroyltriglutamate--homocysteine methyltransferase 1-like; K00549 5-methyltetrahydropteroyltriglutamate--homocysteine methyltransferase [EC:2.1.1.14] (A)	5-methyltetrahydropteroyltriglutamate--homocysteine methyltransferase 1 OS=Arabidopsis thaliana GN=MS1 PE=1 SV=1	Cobalamin-independent synthase, N-terminal domain
BnaA09T0385200WE	0.0914661	0.271518	0.064473	0.0580879	-0.0385681	0.296697	-0.134703	0.0370699	-0.0132448	0.369935	0.343191	0.10418	myrosinase; myrosinase-like; K01237 myrosinase [EC:3.2.1.147] (A)	Myrosinase OS=Brassica napus PE=2 SV=1	Glycosyl hydrolase family 1
BnaC03T0693400WE	0.338117	0.156074	-0.294861	0.0101589	-0.0384395	0.0965897	-1.10997	0.0430894	0.1167	0.0868193	-0.520952	0.00993861	malate dehydrogenase 1, mitochondrial; K00026 malate dehydrogenase [EC:1.1.1.37] (A)	Malate dehydrogenase 1, mitochondrial OS=Arabidopsis thaliana GN=At1g53240 PE=1 SV=1	lactate/malate dehydrogenase, NAD binding domain
BnaA09T0026100WE	-0.0763362	0.241226	-0.868932	0.0154401	-0.0366121	0.383555	-0.652812	0.00292173	-0.21821	0.0414384	0.00038164	0.323642	thioredoxin M2, chloroplastic-like; K03671 thioredoxin 1 (A)	Thioredoxin M2, chloroplastic OS=Arabidopsis thaliana GN=At4g03520 PE=1 SV=2	Thioredoxin
BnaA03T0142300WE	0.319627	0.0101233	-0.187246	0.127842	-0.0338324	0.348543	0.0598445	0.189793	-0.0281764	0.0734664	0.0142967	0.384976	flavone 3'-O-methyltransferase 1; K13066 caffeic acid 3-O-methyltransferase [EC:2.1.1.68] (A)	Flavone 3'-O-methyltransferase 1 OS=Arabidopsis thaliana GN=OMT1 PE=1 SV=1	Dimerisation domain
BnaC08T0419100WE	-0.500923	0.213454	0.178143	0.259785	-0.0316773	0.341338	0.0791046	0.229516	0.622948	0.0336208	0.136558	0.25336	mitogen-activated protein kinase 8-like; K04371 mitogen-activated protein kinase 1/3 [EC:2.7.11.24] (A)	Mitogen-activated protein kinase 8 OS=Arabidopsis thaliana GN=MPK8 PE=1 SV=2	Protein kinase domain
BnaA09T0113400WE	0.255703	0.00183699	0.0796145	0.237142	-0.0247438	0.248678	-0.40408	0.0333619	0.131475	0.283786	-0.0154777	0.369611	profilin-1-like; K05759 profilin (A)	Profilin-1 OS=Arabidopsis thaliana GN=PRO1 PE=1 SV=1	Profilin
BnaA06T0322500WE	-0.187544	0.0976025	-0.636276	0.0384391	-0.0241241	0.245175	-0.0634429	0.352116	0.0614012	0.274896	-0.262349	0.124406	endoplasmin homolog; K09487 heat shock protein 90kDa beta (A)	Endoplasmin homolog OS=Arabidopsis thaliana GN=SHD PE=1 SV=1	Histidine kinase-, DNA gyrase B-, and HSP90-like ATPase
BnaC04T0471000WE	-0.275259	0.0788014	-0.491949	0.0180872	-0.0241044	0.210181	0.183737	0.170008	-0.0858877	0.143087	0.0531673	0.315486	superoxide dismutase [Cu-Zn] 2, chloroplastic-like; K04565 superoxide dismutase, Cu-Zn family [EC:1.15.1.1] (A)	Superoxide dismutase [Cu-Zn] 2, chloroplastic OS=Arabidopsis thaliana GN=CSD2 PE=1 SV=2	Copper/zinc superoxide dismutase (SODC)
BnaA09T0613900WE	0.154337	0.0401711	-0.475253	0.0543904	-0.0113337	0.243386	-0.160276	0.0782376	0.111268	0.0272496	0.313005	0.0053641	probable calcium-binding protein CML13; K13448 calcium-binding protein CML (A)	Probable calcium-binding protein CML13 OS=Arabidopsis thaliana GN=CML13 PE=2 SV=1	EF-hand domain
BnaA02T0319000WE	-0.272259	0.0328232	-0.186118	0.0323359	-0.00817237	0.0196984	-0.107278	0.105235	0.241047	0.074983	0.293553	0.191543	hypothetical protein; K15687 E3 ubiquitin-protein ligase makorin [EC:2.3.2.27] (A)	Zinc finger CCCH domain-containing protein 17 OS=Arabidopsis thaliana GN=At2g02160 PE=1 SV=1	--
BnaC09T0578500WE	-0.102775	0.0725777	0.329088	0.18364	0.00661899	0.302036	-0.180189	0.313447	0.354321	0.0317924	0.357828	0.0681903	histone deacetylase HDT1-like; K11276 nucleophosmin 1 (A)	Histone deacetylase HDT3 OS=Arabidopsis thaliana GN=HDT3 PE=1 SV=2	--
BnaA08T0057400WE	0.132601	0.239859	-0.408759	0.0335377	0.0129773	0.347584	0.103265	0.187644	-0.0912227	0.0972069	0.138942	0.129877	--	--	--
BnaA02T0246400WE	0.191079	0.093577	-0.729585	0.0198032	0.0217556	0.354936	-0.0179681	0.20049	-0.0690059	0.224197	0.450239	0.0288947	probable phospholipid hydroperoxide glutathione peroxidase 6, mitochondrial; K00432 glutathione peroxidase [EC:1.11.1.9] (A)	Probable phospholipid hydroperoxide glutathione peroxidase 6, mitochondrial OS=Arabidopsis thaliana GN=GPX6 PE=2 SV=2	Glutathione peroxidase
BnaA07T0060300WE	-0.181578	0.0828021	0.0800098	0.373894	0.0297941	0.367868	-0.266278	0.0471523	-0.276361	0.0426194	-0.338602	0.0174136	60S ribosomal protein L13a-2-like; K02872 large subunit ribosomal protein L13Ae (A)	60S ribosomal protein L13a-2 OS=Arabidopsis thaliana GN=RPL13AB PE=1 SV=1	Ribosomal protein L13
BnaC01T0358000WE	0.226868	0.0949398	-0.292836	0.141868	0.0368391	0.371581	-0.3395	0.0634633	-0.397738	0.0341567	-0.165023	0.207644	--	TSA1-like protein OS=Arabidopsis thaliana GN=NAI2 PE=1 SV=1	--
BnaA10T0208100WE	-0.231998	0.0311202	0.209193	0.134591	0.0385495	0.342944	0.226922	0.0953733	-0.0760736	0.0429272	0.0878296	0.200935	putative auxin efflux carrier component 5; K13947 auxin efflux carrier family (A)	Putative auxin efflux carrier component 5 OS=Arabidopsis thaliana GN=PIN5 PE=3 SV=1	Eukaryotic porin
BnaC05T0451100WE	-0.147561	0.0824145	-0.132842	0.035205	0.0423576	0.15032	-0.365983	0.0777553	0.162864	0.0796671	-0.138242	0.085786	phosphoglycerate kinase 1, chloroplastic; K00927 phosphoglycerate kinase [EC:2.7.2.3] (A)	Phosphoglycerate kinase 1, chloroplastic OS=Arabidopsis thaliana GN=PGK1 PE=1 SV=1	Phosphoglycerate kinase
BnaC04T0086100WE	0.0351802	0.304488	-0.0744574	0.224103	0.0515437	0.124512	-0.183661	0.0752312	0.119861	0.122301	0.184444	0.0461151	accA2; acetyl-coenzyme A carboxylase carboxyl transferase subunit alpha, chloroplastic-like; K01962 acetyl-CoA carboxylase carboxyl transferase subunit alpha [EC:6.4.1.2] (A)	Acetyl-coenzyme A carboxylase carboxyl transferase subunit alpha, chloroplastic OS=Arabidopsis thaliana GN=CAC3 PE=1 SV=1	Acetyl co-enzyme A carboxylase carboxyltransferase alpha subunit
BnaA10T0097300WE	-0.0868901	0.222801	-0.733235	0.00890248	0.058109	0.130891	0.122887	0.334175	-0.190599	0.0824657	-0.0966526	0.195035	hypothetical protein; K00326 cytochrome-b5 reductase [EC:1.6.2.2] (A)	Cytochrome b5 OS=Brassica oleracea var. botrytis GN=CYB5 PE=1 SV=1	Cytochrome b5-like Heme/Steroid binding domain
BnaA03T0346500WE	-0.286282	0.0131753	0.141247	0.0583145	0.0591115	0.0942126	-0.0502727	0.152034	-0.0432736	0.348672	-0.0473379	0.0697565	chaperonin CPN60-like 2, mitochondrial; K04077 chaperonin GroEL (A)	Chaperonin CPN60-like 2, mitochondrial OS=Arabidopsis thaliana GN=At3g13860 PE=2 SV=2	TCP-1/cpn60 chaperonin family
BnaC05T0046600WE	0.0612443	0.143485	-0.310183	0.0374909	0.0612275	0.0328461	-0.490666	0.0739384	0.522394	0.0206162	-0.1799	0.125248	hypothetical protein; K13459 disease resistance protein RPS2 (A)	Peroxisomal and mitochondrial division factor 2 OS=Arabidopsis thaliana GN=PMD2 PE=1 SV=1	--
BnaC08T0367400WE	-0.0138565	0.349156	-0.446224	0.0111972	0.0613576	0.0834799	-0.172666	0.0280075	0.0178161	0.344345	0.0436505	0.176909	RAN GTPase-activating protein 1; K14319 Ran GTPase-activating protein 1 (A)	RAN GTPase-activating protein 1 OS=Arabidopsis thaliana GN=RANGAP1 PE=1 SV=1	Leucine Rich repeat
BnaA09T0388200WE	-0.343159	0.057985	0.378201	0.178157	0.0620064	0.16984	-0.791742	0.140588	0.257573	0.0382255	-0.681211	0.056611	uncharacterized LOC103329149; K19307 25S rRNA (uracil2634-N3)-methyltransferase [EC:2.1.1.313] (A)	--	Protein of unknown function (DUF1296)
BnaA01T0135000WE	-0.277522	0.0125972	-0.0638512	0.353092	0.0649484	0.262005	-0.313997	0.031947	-0.540598	0.0200994	-0.338083	0.00267864	60S ribosomal protein L26-1; K02898 large subunit ribosomal protein L26e (A)	60S ribosomal protein L26-1 OS=Arabidopsis thaliana GN=RPL26A PE=2 SV=2	KOW motif
BnaA03T0438200WE	0.151672	0.216591	-0.618313	0.0269152	0.0676909	0.250663	-0.0518811	0.111268	0.0715253	0.37561	0.126961	0.154143	heat shock factor-binding protein 1-like; K19765 heat shock factor-binding protein 1 (A)	Heat shock factor-binding protein 1 OS=Homo sapiens GN=HSBP1 PE=1 SV=1	Heat shock factor binding protein 1
BnaC05T0447100WE	-0.196744	0.0616301	-0.14109	0.0493964	0.0703684	0.0269794	-0.0994985	0.0609804	0.156585	0.070166	-0.135149	0.0691374	enhancer of mRNA-decapping protein 4-like; K12616 enhancer of mRNA-decapping protein 4 (A)	Enhancer of mRNA-decapping protein 4 OS=Arabidopsis thaliana GN=VCS PE=1 SV=1	WD domain, G-beta repeat
BnaC04T0098000WE	0.0073655	0.311644	-0.0692079	0.221365	0.0735041	0.0836472	0.319447	0.00479934	-0.0420291	0.224809	0.0100531	0.388366	hypothetical protein; K00789 S-adenosylmethionine synthetase [EC:2.5.1.6] (A)	S-adenosylmethionine synthase 3 OS=Arabidopsis thaliana GN=METK3 PE=1 SV=1	S-adenosylmethionine synthetase, N-terminal domain
BnaC04T0028000WE	-0.370063	0.00913793	-0.108245	0.11794	0.0775219	0.0883254	-0.155026	0.123166	0.172994	0.199452	-0.00237502	0.356027	villin-3-like; K05768 gelsolin (A)	Villin-2 OS=Arabidopsis thaliana GN=VLN2 PE=1 SV=2	Villin headpiece domain
BnaA04T0071400WE	-0.0635963	0.111006	-0.0973052	0.0853929	0.0831691	0.0419971	-0.238075	0.0207188	-0.00153913	0.265707	-0.0776534	0.0419078	dihydrolipoyllysine-residue acetyltransferase component 1 of pyruvate dehydrogenase complex, mitochondrial-like; K00627 pyruvate dehydrogenase E2 component (dihydrolipoamide acetyltransferase) [EC:2.3.1.12] (A)	Dihydrolipoyllysine-residue acetyltransferase component 1 of pyruvate dehydrogenase complex, mitochondrial OS=Arabidopsis thaliana GN=LTA3 PE=2 SV=2	e3 binding domain
BnaA08T0043100WE	0.0781159	0.0596216	-0.631972	0.0158045	0.0906444	0.0651043	-0.420735	0.142362	0.100784	0.226004	0.0655599	0.265301	--	Succinate dehydrogenase subunit 5, mitochondrial OS=Arabidopsis thaliana GN=SDH5 PE=1 SV=1	Domain of unknown function (DUF4370)
BnaC03T0229800WE	-0.489798	0.044082	-0.0243551	0.256646	0.092841	0.271837	0.466131	0.109496	0.468856	0.0557869	0.747464	0.0835045	peroxidase 37; K00430 peroxidase [EC:1.11.1.7] (A)	Peroxidase C2 OS=Armoracia rusticana GN=PRXC2 PE=3 SV=1	Peroxidase
BnaA07T0303300WE	0.113833	0.0867613	-1.14289	0.00290841	0.092896	0.351866	-0.240655	0.0775165	-0.0319656	0.302253	-0.8792	0.00694595	--	--	cAMP-regulated phosphoprotein/endosulfine conserved region
BnaA05T0394000WE	0.0825597	0.0589457	-0.137222	0.0914487	0.100079	0.128921	-0.146115	0.0309166	-0.029753	0.298088	0.116105	0.0347551	cell division control protein 48 homolog A; K13525 transitional endoplasmic reticulum ATPase (A)	Cell division control protein 48 homolog A OS=Arabidopsis thaliana GN=CDC48A PE=1 SV=1	Cell division protein 48 (CDC48), domain 2
BnaA09T0207200WE	0.338004	0.00969209	-0.885246	0.0150532	0.105413	0.296607	-0.0072054	0.378165	-0.0177209	0.0338538	-0.142686	0.0873454	NADH dehydrogenase [ubiquinone] 1 beta subcomplex subunit 7; K03963 NADH dehydrogenase (ubiquinone) 1 beta subcomplex subunit 7 (A)	NADH dehydrogenase [ubiquinone] 1 beta subcomplex subunit 7 OS=Arabidopsis thaliana GN=At2g02050 PE=3 SV=1	NADH-ubiquinone oxidoreductase B18 subunit (NDUFB7)
BnaA03T0361400WE	0.00642131	0.138488	-0.403601	0.0126615	0.106928	0.0983001	-1.21778	0.106346	-0.280088	0.0290051	-0.316638	0.0191794	S-adenosylmethionine synthase 2; K00789 S-adenosylmethionine synthetase [EC:2.5.1.6] (A)	S-adenosylmethionine synthase 2 OS=Brassica juncea GN=MSAMS2 PE=2 SV=1	S-adenosylmethionine synthetase, N-terminal domain
BnaA10T0285300WE	-0.152258	0.00628614	0.0351897	0.090421	0.107983	0.189301	-0.139567	0.191543	-0.212121	0.107987	-0.084029	0.265432	adenosine kinase 2-like; K00856 adenosine kinase [EC:2.7.1.20] (A)	Adenosine kinase 2 OS=Arabidopsis thaliana GN=ADK2 PE=1 SV=1	pfkB family carbohydrate kinase
BnaC06T0073700WE	-0.201686	0.00782331	-0.207933	0.0275265	0.109112	0.241861	-0.326795	0.0683195	0.0176606	0.251017	-0.182995	0.0455308	dihydrolipoyllysine-residue acetyltransferase component 3 of pyruvate dehydrogenase complex, mitochondrial; K00627 pyruvate dehydrogenase E2 component (dihydrolipoamide acetyltransferase) [EC:2.3.1.12] (A)	Dihydrolipoyllysine-residue acetyltransferase component 3 of pyruvate dehydrogenase complex, mitochondrial OS=Arabidopsis thaliana GN=At1g54220 PE=2 SV=1	e3 binding domain
BnaA09T0411200WE	-0.147391	0.102316	-0.306511	0.0552021	0.11772	0.356213	-0.456156	0.177828	0.490365	0.0297045	-0.187373	0.202985	hypothetical protein; K00326 cytochrome-b5 reductase [EC:1.6.2.2] (A)	Cytochrome b5 isoform A OS=Arabidopsis thaliana GN=CB5-A PE=1 SV=1	Cytochrome b5-like Heme/Steroid binding domain
BnaA08T0180200WE	0.112943	0.132858	-0.418822	0.00835169	0.119215	0.131728	0.00668938	0.335485	-0.101065	0.154118	0.0499377	0.256087	26S proteasome non-ATPase regulatory subunit 4 homolog; K03029 26S proteasome regulatory subunit N10 (A)	26S proteasome non-ATPase regulatory subunit 4 homolog OS=Arabidopsis thaliana GN=RPN10 PE=1 SV=1	Ubiquitin interaction motif
BnaC05T0064800WE	-0.102132	0.0297045	-0.517932	0.00245152	0.120701	0.00817895	0.568975	0.0765954	-0.26209	0.107122	-0.149701	0.0426886	superoxide dismutase [Cu-Zn] 1; K04565 superoxide dismutase, Cu-Zn family [EC:1.15.1.1] (A)	Superoxide dismutase [Cu-Zn] 1 OS=Arabidopsis thaliana GN=CSD1 PE=1 SV=2	Copper/zinc superoxide dismutase (SODC)
BnaA01T0132900WE	0.447075	0.0640399	-0.890339	0.0196004	0.132143	0.14282	-0.336199	0.148632	-0.0667396	0.304379	0.476713	0.0643672	probable calcium-binding protein CML20; K13448 calcium-binding protein CML (A)	Probable calcium-binding protein CML20 OS=Arabidopsis thaliana GN=CML20 PE=1 SV=1	EF-hand domain pair
BnaC09T0040400WE	-0.227423	0.038741	-0.430757	0.0210608	0.132989	0.0494337	-0.0168915	0.274395	-0.0119795	0.231275	0.0455893	0.34688	--	Uncharacterized protein At5g48480 OS=Arabidopsis thaliana GN=At5g48480 PE=1 SV=1	Glyoxalase-like domain
BnaA10T0187000WE	-0.139724	0.109186	0.0817231	0.196809	0.146125	0.00271683	0.197451	0.0144545	0.0524747	0.171264	0.123214	0.0372719	5-methyltetrahydropteroyltriglutamate--homocysteine methyltransferase 1-like; K00549 5-methyltetrahydropteroyltriglutamate--homocysteine methyltransferase [EC:2.1.1.14] (A)	5-methyltetrahydropteroyltriglutamate--homocysteine methyltransferase 1 OS=Arabidopsis thaliana GN=MS1 PE=1 SV=1	Cobalamin-independent synthase, N-terminal domain
BnaA03T0196900WE	-0.211786	0.115461	-0.121764	0.289771	0.155542	0.221543	-0.277385	0.0347223	0.115288	0.111419	-0.0243625	0.342534	acetyl-coenzyme A carboxylase carboxyl transferase subunit alpha, chloroplastic; K01962 acetyl-CoA carboxylase carboxyl transferase subunit alpha [EC:6.4.1.2] (A)	Acetyl-coenzyme A carboxylase carboxyl transferase subunit alpha, chloroplastic OS=Arabidopsis thaliana GN=CAC3 PE=1 SV=1	Acetyl co-enzyme A carboxylase carboxyltransferase alpha subunit
BnaA01T0257500WE	0.479981	0.0425542	0.229207	0.0786534	0.161907	0.272069	-0.412346	0.0442021	-0.205007	0.0216376	-0.338011	0.193557	laminin subunit alpha-3-like; K06240 laminin, alpha 3/5 (A)	TSA1-like protein OS=Arabidopsis thaliana GN=NAI2 PE=1 SV=1	--
BnaC03T0264500WE	-0.334506	0.028173	0.0175804	0.144252	0.163067	0.0326846	0.56141	0.0165974	0.220536	0.042414	-0.115659	0.0941415	S-adenosylmethionine synthase-like; K00789 S-adenosylmethionine synthetase [EC:2.5.1.6] (A)	S-adenosylmethionine synthase OS=Brassica rapa subsp. pekinensis GN=SAMS PE=2 SV=1	S-adenosylmethionine synthetase, N-terminal domain
BnaA01T0249300WE	0.219201	0.269751	-0.498109	0.0345982	0.166151	0.12973	-0.100516	0.320156	0.113338	0.06728	0.139489	0.255816	--	Probable protein Pop3 OS=Arabidopsis thaliana GN=At3g17210 PE=1 SV=1	Stress responsive A/B Barrel Domain
BnaA02T0041900WE	-0.0298284	0.192845	-0.331575	0.0318681	0.173512	0.0100293	-0.568757	0.0667396	0.0470492	0.229398	-0.0491516	0.213552	clathrin interactor EPSIN 1-like; K12471 epsin (A)	Clathrin interactor EPSIN 1 OS=Arabidopsis thaliana GN=EPSIN1 PE=1 SV=1	ENTH domain
BnaC03T0698800WE	0.231823	0.0673756	-0.492032	0.0744537	0.18034	0.248973	-0.370685	0.00173533	-0.364602	0.00893522	0.0967021	0.16468	geranylgeranyl diphosphate reductase, chloroplastic; K10960 geranylgeranyl reductase [EC:1.3.1.83] (A)	Inactive GDSL esterase/lipase-like protein 23 OS=Arabidopsis thaliana GN=GLL23 PE=1 SV=1	GDSL-like Lipase/Acylhydrolase
BnaC09T0495100WE	0.225891	0.234208	-0.504245	0.0234776	0.184598	0.304811	-0.512175	0.055212	-0.444939	0.00439409	0.107828	0.124264	nascent polypeptide-associated complex subunit alpha-like protein 3; K03626 nascent polypeptide-associated complex subunit alpha (A)	Nascent polypeptide-associated complex subunit alpha-like protein 1 OS=Arabidopsis thaliana GN=At3g12390 PE=1 SV=1	NAC domain
BnaA05T0367900WE	-0.188037	0.279937	-0.161426	0.0179455	0.186871	0.0353346	-0.207445	0.0498251	0.0139843	0.364851	-0.121989	0.177588	enhancer of mRNA-decapping protein 4-like; K12616 enhancer of mRNA-decapping protein 4 (A)	Enhancer of mRNA-decapping protein 4 OS=Arabidopsis thaliana GN=VCS PE=1 SV=1	WD domain, G-beta repeat
BnaC06T0169000WE	0.22614	0.154835	-0.121317	0.169559	0.187559	0.0231756	-0.889977	0.0449389	0.112532	0.0264343	-0.47957	0.00643282	DEAD-box ATP-dependent RNA helicase 38-like; K18655 ATP-dependent RNA helicase DDX19/DBP5 [EC:3.6.4.13] (A)	DEAD-box ATP-dependent RNA helicase 38 OS=Arabidopsis thaliana GN=RH38 PE=1 SV=2	Helicase conserved C-terminal domain
BnaA06T0466300WE	0.048129	0.277514	0.0700487	0.127812	0.187944	0.0450225	-0.43777	0.0813645	0.0400656	0.262124	-0.218155	0.00211818	Os03g0332500; K02866 large subunit ribosomal protein L10e (A)	Acid phosphatase 1 OS=Solanum lycopersicum GN=APS1 PE=2 SV=1	HAD superfamily, subfamily IIIB (Acid phosphatase)
BnaC01T0248300WE	-0.0227935	0.145098	0.142291	0.0566863	0.198804	0.0240075	-0.0550925	0.10345	-0.0720879	0.197457	-0.000100586	0.200094	atp1; ATPase subunit 1; K02132 F-type H+-transporting ATPase subunit alpha (A)	ATP synthase subunit alpha, mitochondrial OS=Raphanus sativus GN=ATPA PE=3 SV=1	ATP synthase alpha/beta family, beta-barrel domain
BnaA03T0003400WE	0.349099	0.00831101	-0.326099	0.175075	0.202136	0.192783	0.754739	0.0296496	-0.028408	0.307768	0.265328	0.0477104	--	--	Mitochondrial ATPase inhibitor, IATP
BnaC08T0173200WE	0.184902	0.0436854	-0.618345	0.0331631	0.21919	0.0196133	-1.38018	0.124079	-0.0399335	0.113175	0.169427	0.205139	probable calcium-binding protein CML13; K13448 calcium-binding protein CML (A)	Probable calcium-binding protein CML13 OS=Arabidopsis thaliana GN=CML13 PE=2 SV=1	EF-hand domain
BnaC04T0383100WE	-0.104799	0.341292	-0.0158022	0.217137	0.21956	0.110482	0.696916	0.0188987	0.769866	0.265941	-0.339521	0.184445	--	Uncharacterized protein At5g39570 OS=Arabidopsis thaliana GN=At5g39570 PE=1 SV=1	--
BnaA01T0112500WE	0.444635	0.0228808	-0.348318	0.128617	0.223841	0.0506188	-0.0531449	0.319253	0.839154	0.00848559	0.267173	0.129496	heat shock factor-binding protein 1-like; K19765 heat shock factor-binding protein 1 (A)	Translocase of chloroplast 159, chloroplastic OS=Arabidopsis thaliana GN=TOC159 PE=1 SV=1	Heat shock factor binding protein 1
BnaA05T0420500WE	0.0753214	0.217503	-0.495185	0.0258762	0.224808	0.129519	-0.28914	0.0909123	0.136687	0.163663	0.0400124	0.17892	LbPrx1; peroxiredoxin; K14171 alkyl hydroperoxide reductase 1 [EC:1.11.1.15] (A)	Peroxiredoxin-2F, mitochondrial OS=Arabidopsis thaliana GN=PRXIIF PE=1 SV=2	Redoxin
BnaA03T0182000WE	0.68972	0.213869	0.331315	0.0569226	0.228239	0.00819921	0.103094	0.298041	1.25287	0.0235758	-0.0770249	0.303039	serine/threonine protein kinase, putative (EC:2.7.10.2); K04422 mitogen-activated protein kinase kinase kinase 13 [EC:2.7.11.25] (A)	Serine/threonine-protein kinase CTR1 OS=Arabidopsis thaliana GN=CTR1 PE=1 SV=1	PB1 domain
BnaA09T0631100WE	-0.162639	0.0599506	-0.429515	0.0258003	0.230466	0.179977	0.172858	0.210579	-0.423919	0.0595081	-0.34573	0.0384017	superoxide dismutase [Cu-Zn]; K04565 superoxide dismutase, Cu-Zn family [EC:1.15.1.1] (A)	Superoxide dismutase [Cu-Zn] OS=Brassica oleracea var. capitata GN=SODCC PE=1 SV=2	Copper/zinc superoxide dismutase (SODC)
BnaC05T0014800WE	0.210328	0.0557449	-0.346224	0.0695784	0.238029	0.17353	0.192072	0.180445	-1.0071	0.0124896	-0.419583	0.0110744	60S ribosomal protein L19-1-like; K02885 large subunit ribosomal protein L19e (A)	60S ribosomal protein L19-2 OS=Arabidopsis thaliana GN=RPL19B PE=2 SV=1	Ribosomal protein L19e
BnaC05T0147300WE	0.533114	0.00979891	-0.873833	0.0205943	0.238403	0.242741	-0.412573	0.0920523	0.453177	0.0166282	0.142436	0.380719	probable calcium-binding protein CML27; K13448 calcium-binding protein CML (A)	Probable calcium-binding protein CML27 OS=Arabidopsis thaliana GN=CML27 PE=1 SV=1	EF-hand domain pair
BnaA10T0251400WE	-0.0625061	0.21296	-0.583535	0.0322968	0.250505	0.010485	0.0642417	0.21158	-0.0305249	0.294226	0.153398	0.0634646	hypothetical protein; K07466 replication factor A1 (A)	--	--
BnaA03T0448600WE	-0.437819	0.19437	-0.229308	0.0146249	0.253691	0.0659949	-1.27853	0.0721233	-1.48614	0.150021	0.210699	0.299365	plasminogen activator inhibitor 1 RNA-binding protein-like; K13199 plasminogen activator inhibitor 1 RNA-binding protein (A)	--	Stm1
BnaA09T0550900WE	0.123569	0.26094	-0.333335	0.0489039	0.264451	0.027237	0.00515226	0.148953	0.257011	0.121004	0.116294	0.351781	--	Nucleoid-associated protein alr5067 OS=Nostoc sp. (strain PCC 7120 / UTEX 2576) GN=alr5067 PE=3 SV=1	YbaB/EbfC DNA-binding family
BnaC09T0111300WE	0.279205	0.112658	-0.711422	0.0118608	0.266737	0.0342882	-0.562311	0.021086	0.0594676	0.363511	0.0763597	0.344329	receptor homology region, transmembrane domain- and RING domain-containing protein 1; K15692 E3 ubiquitin-protein ligase RNF13 [EC:2.3.2.27] (A)	Thiosulfate sulfurtransferase 16, chloroplastic OS=Arabidopsis thaliana GN=STR16 PE=1 SV=2	Rhodanese-like domain
BnaA04T0213400WE	-0.0607003	0.276975	-0.444789	0.0212819	0.267223	0.0279237	-0.106351	0.101278	0.12492	0.330545	0.199963	0.0777764	thioredoxin O1, mitochondrial; K03671 thioredoxin 1 (A)	Thioredoxin O1, mitochondrial OS=Arabidopsis thaliana GN=At2g35010 PE=2 SV=1	Thioredoxin
BnaA09T0456100WE	0.228008	0.106005	-0.600507	0.0288856	0.267518	0.139953	-0.392213	0.113677	0.0315174	0.299093	0.255719	0.0436435	ATP synthase subunit d, mitochondrial; K02138 F-type H+-transporting ATPase subunit d (A)	ATP synthase subunit d, mitochondrial OS=Arabidopsis thaliana GN=At3g52300 PE=1 SV=3	ATP synthase D chain, mitochondrial (ATP5H)
BnaA09T0561600WE	0.206364	0.0121413	-0.171876	0.148608	0.270606	0.0398578	-0.179272	0.0163965	-0.494206	0.0106863	0.272952	0.0368492	--	--	PLAT/LH2 domain
BnaA03T0209600WE	0.0961101	0.17884	-0.601223	0.0323595	0.274362	0.0426996	0.0526365	0.0538604	0.153187	0.0748996	0.11139	0.127628	clathrin light chain 2-like; K04645 clathrin light chain B (A)	Clathrin light chain 2 OS=Arabidopsis thaliana GN=CLC2 PE=1 SV=1	Clathrin light chain
BnaC02T0397500WE	0.0215652	0.24624	-0.539761	0.00853766	0.276007	0.0228514	-0.0587308	0.154183	-0.10105	0.207384	-0.165105	0.14941	ATP synthase subunit delta', mitochondrial-like; K02134 F-type H+-transporting ATPase subunit delta (A)	ATP synthase subunit delta', mitochondrial OS=Arabidopsis thaliana GN=At5g47030 PE=1 SV=1	ATP synthase, Delta/Epsilon chain, beta-sandwich domain
BnaA09T0413400WE	-0.0708481	0.197617	-0.461768	0.0395584	0.277462	0.325788	-0.346936	0.0138285	-0.534846	0.083242	0.194843	0.0103033	probable mediator of RNA polymerase II transcription subunit 37e; K03283 heat shock 70kDa protein 1/8 (A)	Probable mediator of RNA polymerase II transcription subunit 37e OS=Arabidopsis thaliana GN=MED37E PE=1 SV=3	Hsp70 protein
BnaA03T0331000WE	0.0424781	0.296042	0.279664	0.187963	0.279567	0.0107931	-0.135731	0.0160167	0.3196	0.0171474	-0.0425606	0.15724	uncharacterized LOC103947160; K03655 ATP-dependent DNA helicase RecG [EC:3.6.4.12] (A)	Nuclear pore complex protein NUP1 OS=Arabidopsis thaliana GN=NUP1 PE=1 SV=1	--
BnaA03T0222500WE	0.178996	0.315375	-0.107151	0.0299935	0.281703	0.0304391	-0.167341	0.143921	0.235863	0.206875	0.0789473	0.231799	3-isopropylmalate dehydratase small subunit 3; K01704 3-isopropylmalate/(R)-2-methylmalate dehydratase small subunit [EC:4.2.1.33 4.2.1.35] (A)	3-isopropylmalate dehydratase small subunit 3 OS=Arabidopsis thaliana GN=At2g43090 PE=1 SV=1	Aconitase C-terminal domain
BnaC08T0032300WE	-0.444134	0.198099	-0.273226	0.139412	0.283116	0.157035	-1.14299	0.0604406	0.849207	0.00614255	-0.114992	0.122765	RAN GTPase-activating protein 1-like; K14319 Ran GTPase-activating protein 1 (A)	WPP domain-containing protein 2 OS=Arabidopsis thaliana GN=WPP2 PE=1 SV=1	WPP domain
BnaA04T0270000WE	0.0148909	0.273097	0.0570672	0.072964	0.28418	0.0057067	-1.93297	0.169627	0.511229	0.0406246	-0.219036	0.0484022	CHL-CPN10; 20 kDa chaperonin, chloroplastic-like; K04078 chaperonin GroES (A)	10 kDa chaperonin 1 OS=Bradyrhizobium diazoefficiens (strain JCM 10833 / IAM 13628 / NBRC 14792 / USDA 110) GN=groS1 PE=2 SV=1	Chaperonin 10 Kd subunit
BnaA03T0217700WE	-0.269192	0.00928857	0.0589366	0.147224	0.28715	0.0110021	-0.00975183	0.16103	-0.044196	0.0600703	0.124084	0.0568949	villin-3-like; K05768 gelsolin (A)	Villin-2 OS=Arabidopsis thaliana GN=VLN2 PE=1 SV=2	Villin headpiece domain
BnaA05T0016800WE	0.102088	0.0715433	-0.0729752	0.388278	0.288101	0.0417685	-0.601367	0.138081	0.00498297	0.272846	-0.0250591	0.366277	villin-3-like; K05768 gelsolin (A)	Villin-2 OS=Arabidopsis thaliana GN=VLN2 PE=1 SV=2	Villin headpiece domain
BnaA09T0602200WE	-0.0578546	0.372706	-0.325884	0.135443	0.292436	0.0550349	-0.263692	0.242589	-0.283358	0.0160023	0.054937	0.20639	ribonuclease 3-like; K01166 ribonuclease T2 [EC:3.1.27.1] (A)	Ribonuclease 3 OS=Arabidopsis thaliana GN=RNS3 PE=2 SV=1	Ribonuclease T2 family
BnaA02T0233800WE	-0.154195	0.0153402	-0.029308	0.252557	0.296529	0.0113084	-0.0985508	0.0493605	-0.0342201	0.121667	0.0670946	0.10172	V-type proton ATPase catalytic subunit A-like; K02145 V-type H+-transporting ATPase subunit A [EC:3.6.3.14] (A)	V-type proton ATPase catalytic subunit A OS=Arabidopsis thaliana GN=VHA-A PE=1 SV=1	ATP synthase alpha/beta family, beta-barrel domain
BnaC01T0021500WE	-0.0766582	0.358138	0.088519	0.0042223	0.298835	0.00420566	0.0311698	0.232796	-0.0192113	0.0291322	0.110741	0.0313381	cyclase-associated protein 1; K17261 adenylyl cyclase-associated protein (A)	Cyclase-associated protein 1 OS=Arabidopsis thaliana GN=CAP1 PE=2 SV=1	Adenylate cyclase associated (CAP) C terminal
BnaA07T0344200WE	-0.829457	0.0580165	-1.1352	0.025093	0.301759	0.0448358	-0.979199	0.0962864	-0.020661	0.349392	0.353486	0.0501997	HHIPL2, TAF1A; HHIP-like 2; K15212 TATA box-binding protein-associated factor RNA polymerase I subunit A (A)	HIPL1 protein OS=Arabidopsis thaliana GN=HIPL1 PE=1 SV=2	Glucose / Sorbosone dehydrogenase
BnaC07T0227600WE	0.0252417	0.107565	-0.630366	0.0197763	0.304149	0.109143	-0.287332	0.19528	0.225846	0.103579	0.207873	0.0731735	probable calcium-binding protein CML43; K13448 calcium-binding protein CML (A)	Probable calcium-binding protein CML43 OS=Arabidopsis thaliana GN=CML43 PE=2 SV=1	EF-hand domain pair
BnaC07T0048000WE	0.111959	0.07336	-0.582935	0.0209339	0.30429	0.0143573	-0.019039	0.144226	0.0913371	0.191787	-0.322658	0.0425756	ubiquitin domain-containing protein DSK2b-like; K04523 ubiquilin (A)	Ubiquitin domain-containing protein DSK2b OS=Arabidopsis thaliana GN=DSK2B PE=1 SV=1	UBA/TS-N domain
BnaC05T0417600WE	0.358673	0.121319	-0.218842	0.163758	0.309442	0.111942	-0.529132	0.0315779	-0.292673	0.00824486	-0.212967	0.0999383	--	TSA1-like protein OS=Arabidopsis thaliana GN=NAI2 PE=1 SV=1	--
BnaA05T0063200WE	-0.355775	0.0458961	-0.00663558	0.163313	0.318821	0.0581843	-1.4189	0.172891	0.463988	0.285043	-0.17286	0.00431347	accA1-2; acetyl-coenzyme A carboxylase carboxyl transferase subunit alpha, chloroplastic-like; K01962 acetyl-CoA carboxylase carboxyl transferase subunit alpha [EC:6.4.1.2] (A)	Acetyl-coenzyme A carboxylase carboxyl transferase subunit alpha, chloroplastic OS=Arabidopsis thaliana GN=CAC3 PE=1 SV=1	Acetyl co-enzyme A carboxylase carboxyltransferase alpha subunit
BnaA02T0194600WE	0.0340807	0.228591	-0.929168	0.00721103	0.32101	0.133609	-0.27371	0.0737759	-0.0257333	0.379466	-0.384176	0.059038	--	Subtilisin-like protease SBT3.3 OS=Arabidopsis thaliana GN=SBT3.3 PE=2 SV=1	Peptidase inhibitor I9
BnaC06T0068300WE	-0.263493	0.112913	-0.108435	0.0629626	0.324398	0.0261056	-0.295113	0.190948	-0.17494	0.0342388	-0.493437	0.0023157	heat shock 70 kDa protein 14-like; K09489 heat shock 70kDa protein 4 (A)	Heat shock 70 kDa protein 14 OS=Arabidopsis thaliana GN=HSP70-14 PE=2 SV=1	Hsp70 protein
BnaC07T0162900WE	-0.0752374	0.0174748	-0.0659663	0.0966976	0.325192	0.0425201	-0.0991485	0.283724	-0.0818042	0.379979	0.22472	0.0603723	protein disulfide isomerase-like 1-1; K09580 protein disulfide-isomerase A1 [EC:5.3.4.1] (A)	Protein disulfide isomerase-like 1-1 OS=Arabidopsis thaliana GN=PDIL1-1 PE=1 SV=1	Thioredoxin-like domain
BnaA05T0316500WE	-0.16342	0.222801	-0.0616639	0.106164	0.329479	0.0387996	0.45405	0.09757	-0.296926	0.0300594	-0.255591	0.213935	phosphatidylinositol 3,4,5-trisphosphate 3-phosphatase and dual-specificity protein phosphatase PTEN-like; K01110 phosphatidylinositol-3,4,5-trisphosphate 3-phosphatase and dual-specificity protein phosphatase PTEN [EC:3.1.3.16 3.1.3.48 3.1.3.67] (A)	Phosphatidylinositol 3,4,5-trisphosphate 3-phosphatase and dual-specificity protein phosphatase PTEN OS=Dictyostelium discoideum GN=pteN PE=2 SV=1	Dual specificity phosphatase, catalytic domain
BnaA09T0025600WE	0.307688	0.122708	0.0781881	0.280305	0.331938	0.0208557	-0.345627	0.2147	0.755167	0.14875	-0.0793858	0.127823	protein STABILIZED1; K12855 pre-mRNA-processing factor 6 (A)	Protein STABILIZED1 OS=Arabidopsis thaliana GN=STA1 PE=1 SV=1	Tetratricopeptide repeat
BnaA08T0139700WE	0.0288531	0.325081	0.204619	0.124614	0.335357	0.0222355	-0.39524	0.0197563	0.107423	0.126569	0.386339	0.0284952	villin-4; K05768 gelsolin (A)	Villin-4 OS=Arabidopsis thaliana GN=VLN4 PE=1 SV=1	Villin headpiece domain
BnaC08T0283700WE	0.190104	0.13379	0.0616587	0.245599	0.339482	0.0234997	0.202371	0.0532044	0.126146	0.166051	0.00529596	0.192088	PAL2-2; phenylalanine ammonia-lyase 2 (EC:4.3.1.24); K10775 phenylalanine ammonia-lyase [EC:4.3.1.24] (A)	Phenylalanine ammonia-lyase 2 OS=Arabidopsis thaliana GN=PAL2 PE=1 SV=2	Aromatic amino acid lyase
BnaC03T0429800WE	0.117689	0.119378	-0.792289	0.0148748	0.359678	0.04244	-0.416498	0.0977531	-0.102444	0.317839	-0.277297	0.10317	ubiquitin domain-containing protein DSK2b-like; K04523 ubiquilin (A)	Ubiquitin domain-containing protein DSK2b OS=Arabidopsis thaliana GN=DSK2B PE=1 SV=1	UBA/TS-N domain
BnaA02T0246600WE	0.165366	0.239059	0.27146	0.0255439	0.36123	0.0785371	-0.136262	0.184273	0.115402	0.193657	0.652573	0.0301961	BRCA1-A complex subunit BRE-like; K12173 BRCA1-A complex subunit BRE (A)	Osmotin-like protein OSM34 OS=Arabidopsis thaliana GN=OSM34 PE=2 SV=2	Thaumatin family
BnaC06T0464800WE	0.0729571	0.165264	-0.471525	0.0128528	0.363856	0.00886994	0.102757	0.0440213	-0.164147	0.0314337	-0.0133843	0.364376	glutamate-rich WD repeat-containing protein 1-like; K14848 ribosome assembly protein RRB1 (A)	Metacaspase-4 OS=Arabidopsis thaliana GN=AMC4 PE=1 SV=1	Caspase domain
BnaC02T0007300WE	-0.200361	0.0992775	-0.259293	0.0541279	0.3654	0.0135316	-0.0998235	0.199322	0.146429	0.0559097	-0.233751	0.0372596	copper transport protein ATX1-like; K07213 copper chaperone (A)	ACT domain-containing protein ACR12 OS=Arabidopsis thaliana GN=ACR12 PE=2 SV=1	Heavy-metal-associated domain
BnaC04T0547800WE	0.171798	0.0276914	-0.0569384	0.261411	0.365429	0.0922658	0.0501106	0.0778282	-0.0390678	0.206526	0.612839	0.0172147	peroxidase C3; K00430 peroxidase [EC:1.11.1.7] (A)	Peroxidase C3 OS=Armoracia rusticana GN=PRXC3 PE=3 SV=1	Peroxidase
BnaA03T0228700WE	-0.198667	0.0115235	-0.498161	0.104914	0.373547	0.117667	0.889015	0.0323585	-0.0876982	0.151804	-0.174773	0.136506	uncharacterized LOC101760823; K17338 receptor expression-enhancing protein 1/2/3/4 (A)	--	EF-hand domain pair
BnaA07T0321100WE	-0.0705286	0.259798	-0.05272	0.136719	0.376958	0.00844869	0.222224	0.14373	0.129083	0.158053	0.318473	0.118364	peroxidase 12; K00430 peroxidase [EC:1.11.1.7] (A)	Peroxidase 12 OS=Arabidopsis thaliana GN=PER12 PE=1 SV=1	Peroxidase
BnaA06T0022600WE	-0.06158	0.316266	0.00388208	0.213077	0.377967	0.0112101	-0.860547	0.0144077	0.0346969	0.308456	-0.248217	0.0858455	RNA-binding protein 8A-B-like; K12876 RNA-binding protein 8A (A)	RNA-binding protein 8A OS=Salmo salar GN=rbm8a PE=2 SV=1	RNA recognition motif. (a.k.a. RRM, RBD, or RNP domain)
BnaC05T0253300WE	0.426154	0.137622	0.608519	0.119234	0.378125	0.0114411	0.391623	0.300272	0.854815	0.0280905	0.046546	0.153622	patellin-4-like; K19996 phosphatidylinositol transfer protein SFH5 (A)	Patellin-4 OS=Arabidopsis thaliana GN=PATL4 PE=1 SV=2	CRAL/TRIO, N-terminal domain
BnaA07T0285400WE	-0.154252	0.351602	-0.377767	0.135726	0.383515	0.0775087	-0.209342	0.368924	0.447847	0.149449	0.495837	0.035198	protein CROWDED NUCLEI 4-like; K00826 branched-chain amino acid aminotransferase [EC:2.6.1.42] (A)	Protein CROWDED NUCLEI 1 OS=Arabidopsis thaliana GN=CRWN1 PE=1 SV=1	--
BnaA10T0198900WE	0.197564	0.174922	-1.04674	0.0718756	0.396829	0.0169874	-2.01771	0.196899	0.192065	0.181408	-0.490996	0.136275	splicing factor U2AF-associated protein 2-like; K13093 HIV Tat-specific factor 1 (A)	Splicing factor U2AF-associated protein 2 OS=Schizosaccharomyces pombe (strain 972 / ATCC 24843) GN=uap2 PE=1 SV=1	Domain of unknown function (DUF4339)
BnaA03T0194600WE	0.15753	0.2018	0.402183	0.194454	0.399225	0.177349	-0.0165789	0.269648	-0.430954	0.00620716	-0.754083	0.0721751	60S ribosomal protein L36-2-like; K02920 large subunit ribosomal protein L36e (A)	60S ribosomal protein L36-1 OS=Arabidopsis thaliana GN=RPL36A PE=2 SV=1	Ribosomal protein L36e
BnaA08T0045000WE	-0.018687	0.272186	-0.541479	0.0255345	0.407107	0.018305	0.0426956	0.287309	0.180414	0.127467	-0.0598351	0.36747	RAN GTPase-activating protein 1-like; K14319 Ran GTPase-activating protein 1 (A)	WPP domain-containing protein 2 OS=Arabidopsis thaliana GN=WPP2 PE=1 SV=1	WPP domain
BnaC07T0379000WE	-0.0102519	0.314903	0.0821144	0.175536	0.412714	0.00595988	-0.362469	0.00722459	0.156922	0.00674689	0.232419	0.0185032	tripeptidyl-peptidase 2-like; K01280 tripeptidyl-peptidase II [EC:3.4.14.10] (A)	Tripeptidyl-peptidase 2 OS=Arabidopsis thaliana GN=TPP2 PE=1 SV=1	Subtilase family
BnaA08T0166900WE	-0.0597592	0.16681	-0.396478	0.0552866	0.41892	0.0372872	-0.0891343	0.0936353	0.192065	0.359069	0.32449	0.239913	nuclear autoantigenic sperm protein; K11291 nuclear autoantigenic sperm protein (A)	NASP-related protein sim3 OS=Schizosaccharomyces pombe (strain 972 / ATCC 24843) GN=sim3 PE=1 SV=1	SHNi-TPR
BnaA09T0545600WE	0.00564732	0.360268	-0.505571	0.0805134	0.420339	0.0451914	0.10305	0.317092	-0.202118	0.040783	0.313126	0.0131726	--	Early nodulin-like protein 1 OS=Arabidopsis thaliana GN=At2g25060 PE=1 SV=2	Plastocyanin-like domain
BnaC06T0464400WE	-0.0896803	0.0766193	-0.435591	0.0528042	0.427174	0.0160238	0.0155541	0.282651	0.256198	0.0338037	0.0575904	0.0333391	nuclear-pore anchor-like; K09291 nucleoprotein TPR (A)	Nuclear-pore anchor OS=Arabidopsis thaliana GN=NUA PE=1 SV=1	TPR/MLP1/MLP2-like protein
BnaC07T0264200WE	0.0169841	0.336549	-0.154767	0.0813295	0.440492	0.00588628	-0.179938	0.113802	-0.421846	0.0114181	0.234735	0.104041	--	MLP-like protein 328 OS=Arabidopsis thaliana GN=MLP328 PE=2 SV=1	Pathogenesis-related protein Bet v I family
BnaA09T0458800WE	0.320558	0.248172	0.641449	0.0241654	0.446114	0.0315414	-0.0795399	0.366161	0.255504	0.111553	0.542535	0.00942699	nucleolin-like; K13161 heterogeneous nuclear ribonucleoprotein R (A)	Heterogeneous nuclear ribonucleoprotein Q OS=Rattus norvegicus GN=Syncrip PE=2 SV=1	RNA recognition motif. (a.k.a. RRM, RBD, or RNP domain)
BnaC06T0153900WE	0.0580712	0.365839	-0.204863	0.13916	0.460632	0.0429606	-0.250278	0.211932	0.448451	0.0376869	0.193789	0.166288	--	--	--
BnaC01T0059400WE	0.0753276	0.0801593	0.0994254	0.037819	0.461742	0.0128494	-0.126922	0.104406	0.0489544	0.377212	0.00592225	0.337292	villin-4-like; K05768 gelsolin (A)	Villin-4 OS=Arabidopsis thaliana GN=VLN4 PE=1 SV=1	Villin headpiece domain
BnaC05T0387200WE	-1.35048	0.0975644	-0.408125	0.181476	0.463979	0.208696	-0.570108	0.0496461	-0.853497	0.0498475	0.00728568	0.380881	--	Putative lipid-transfer protein DIR1 OS=Arabidopsis thaliana GN=DIR1 PE=1 SV=1	Probable lipid transfer
BnaA02T0063300WE	-0.162787	0.0597726	-0.69732	0.0173884	0.467153	0.105491	-0.346489	0.0241728	0.0961039	0.12665	-0.0698942	0.128744	biotin carboxyl carrier protein of acetyl-CoA carboxylase 1, chloroplastic; K02160 acetyl-CoA carboxylase biotin carboxyl carrier protein (A)	Biotin carboxyl carrier protein of acetyl-CoA carboxylase 1, chloroplastic OS=Arabidopsis thaliana GN=BCCP1 PE=1 SV=2	Biotin-requiring enzyme
BnaC03T0279300WE	0.104383	0.135292	-0.374522	0.0953007	0.487768	0.0372752	-0.397151	0.117186	0.356566	0.117019	0.105812	0.251727	ubiquitin receptor RAD23c; K10839 UV excision repair protein RAD23 (A)	Ubiquitin receptor RAD23c OS=Arabidopsis thaliana GN=RAD23C PE=1 SV=2	Ubiquitin family
BnaA04T0188700WE	0.0469372	0.3781	-0.050131	0.209174	0.494338	0.0421516	-0.435175	0.176121	0.185446	0.267857	0.220411	0.38059	myotubularin-related protein 13-like; K18061 myotubularin-related protein 5/13 (A)	Switch-associated protein 70 OS=Homo sapiens GN=SWAP70 PE=1 SV=1	PH domain
BnaA05T0409100WE	-0.284244	0.0141995	0.541608	0.156931	0.501903	0.0449432	-1.11698	0.168394	0.341032	0.231337	0.231891	0.191023	--	Uncharacterized protein At5g01610 OS=Arabidopsis thaliana GN=At5g01610 PE=1 SV=1	Protein of unknown function, DUF538
BnaA02T0018500WE	-0.307617	0.0221936	0.53381	0.00243171	0.502028	0.00699058	-0.0150019	0.169843	0.840939	0.0127844	0.0938789	0.236174	cellulose synthase A catalytic subunit 3 [UDP-forming]; K10999 cellulose synthase A [EC:2.4.1.12] (A)	Cellulose synthase A catalytic subunit 3 [UDP-forming] OS=Arabidopsis thaliana GN=CESA3 PE=1 SV=2	Zinc-binding RING-finger
BnaA08T0102300WE	0.351497	0.166294	-0.0508809	0.176491	0.50762	0.0194248	-0.741751	0.0388741	0.126635	0.209545	-0.371273	0.0236373	gak; cyclin G associated kinase; K08855 cyclin G-associated kinase [EC:2.7.11.1] (A)	Auxilin-related protein 2 OS=Arabidopsis thaliana GN=At4g12770 PE=1 SV=1	DnaJ domain
BnaC06T0056200WE	0.120341	0.361761	-0.271225	0.144582	0.507833	0.116748	-0.272879	0.245002	-0.675966	0.0362578	0.829297	0.0270905	nuclear pore complex protein NUP50A-like; K15304 Ran-binding protein 3 (A)	Nuclear pore complex protein NUP50A OS=Arabidopsis thaliana GN=NUP50A PE=1 SV=1	RanBP1 domain
BnaC01T0013800WE	0.124961	0.138546	-0.0293142	0.344769	0.510893	0.00398107	-0.277275	0.0641679	-0.016271	0.26401	0.313639	0.0522026	CPK5-2.1, CPK5.1; calcium-dependent protein kinase 5 (EC:2.7.11.1); K13412 calcium-dependent protein kinase [EC:2.7.11.1] (A)	Calcium-dependent protein kinase 5 OS=Arabidopsis thaliana GN=CPK5 PE=2 SV=1	EF-hand domain pair
BnaA03T0002400WE	-0.0153528	0.174578	0.313808	0.0017065	0.517762	0.00888873	-0.119435	0.256671	-0.00840661	0.321241	0.147959	0.152943	probable monodehydroascorbate reductase, cytoplasmic isoform 4; K08232 monodehydroascorbate reductase (NADH) [EC:1.6.5.4] (A)	Probable monodehydroascorbate reductase, cytoplasmic isoform 4 OS=Arabidopsis thaliana GN=At5g03630 PE=2 SV=1	Pyridine nucleotide-disulphide oxidoreductase
BnaA04T0094400WE	0.116686	0.245681	-0.394823	0.153661	0.519565	0.0227676	-0.739075	0.098748	0.88778	0.0899766	0.361558	0.0235205	ubiquitin receptor RAD23d; K10839 UV excision repair protein RAD23 (A)	Ubiquitin receptor RAD23d OS=Arabidopsis thaliana GN=RAD23D PE=1 SV=2	Ubiquitin family
BnaC04T0038900WE	0.41593	0.0263343	0.489435	0.00426168	0.528739	0.00659218	-0.14915	0.237055	-0.0456753	0.2812	0.159615	0.111832	3-isopropylmalate dehydratase small subunit 1-like; K01704 3-isopropylmalate/(R)-2-methylmalate dehydratase small subunit [EC:4.2.1.33 4.2.1.35] (A)	3-isopropylmalate dehydratase small subunit 1 OS=Arabidopsis thaliana GN=IPMI2 PE=1 SV=1	Aconitase C-terminal domain
BnaC07T0248000WE	0.028584	0.177406	0.210488	0.101641	0.539301	0.00779004	-0.206999	0.0424487	0.150713	0.229522	0.0196314	0.261303	probable ADP-ribosylation factor GTPase-activating protein AGD9; K12493 ADP-ribosylation factor GTPase-activating protein 2/3 (A)	Probable ADP-ribosylation factor GTPase-activating protein AGD9 OS=Arabidopsis thaliana GN=AGD9 PE=1 SV=1	Putative GTPase activating protein for Arf
BnaA02T0132900WE	0.0619875	0.357589	-0.595857	0.00808445	0.541437	0.0165313	-0.444298	0.0923115	0.277447	0.132684	0.218809	0.0769195	minor allergen Alt a 7-like; K03809 NAD(P)H dehydrogenase (quinone) [EC:1.6.5.2] (A)	NAD(P)H dehydrogenase (quinone) FQR1 OS=Arabidopsis thaliana GN=FQR1 PE=1 SV=1	NADPH-dependent FMN reductase
BnaA02T0335400WE	-0.226995	0.158033	0.0146332	0.255863	0.547242	0.0651475	0.545796	0.0191048	0.0103569	0.318722	-0.113935	0.35603	aquaporin TIP1-2; K09873 aquaporin TIP (A)	Aquaporin TIP1-2 OS=Arabidopsis thaliana GN=TIP1-2 PE=1 SV=2	Major intrinsic protein
BnaA10T0130500WE	-0.114548	0.19833	0.375241	0.176775	0.550494	0.0398472	-0.319687	0.0943127	0.0836486	0.128747	0.241098	0.164222	--	Calmodulin-binding protein 60 B OS=Arabidopsis thaliana GN=CBP60B PE=2 SV=1	Calmodulin binding protein-like
BnaC07T0395900WE	0.391933	0.0498106	-0.68275	0.118652	0.55296	0.0251986	-1.96702	0.222417	0.102353	0.249168	-0.0204762	0.0436145	V-type proton ATPase subunit G2; K02152 V-type H+-transporting ATPase subunit G (A)	V-type proton ATPase subunit G2 OS=Arabidopsis thaliana GN=VHA-G2 PE=1 SV=2	Vacuolar (H+)-ATPase G subunit
BnaA01T0044600WE	0.0297506	0.0365547	-0.223802	0.376961	0.559173	0.0314244	-0.0245111	0.165672	0.1551	0.315605	0.249667	0.0710463	FAM10 family protein At4g22670-like; K09560 suppressor of tumorigenicity protein 13 (A)	FAM10 family protein At4g22670 OS=Arabidopsis thaliana GN=At4g22670 PE=1 SV=1	TPR repeat
BnaA07T0277800WE	0.252163	0.172529	0.0345118	0.109041	0.563319	0.003306	-0.0754815	0.23826	0.232197	0.0867304	0.134134	0.306798	LETM1 and EF-hand domain-containing protein 1, mitochondrial; K17800 LETM1 and EF-hand domain-containing protein 1, mitochondrial (A)	LETM1 and EF-hand domain-containing protein 1, mitochondrial OS=Gallus gallus GN=LETM1 PE=2 SV=1	LETM1-like protein
BnaA08T0296500WE	0.152931	0.198134	0.218218	0.182171	0.572852	0.0477787	-0.309801	0.0696809	0.46062	0.0290124	0.161209	0.309457	pre-mRNA-splicing factor SLU7-A-like; K12819 pre-mRNA-processing factor SLU7 (A)	Pre-mRNA-splicing factor SLU7-A OS=Arabidopsis thaliana GN=At1g65660 PE=1 SV=2	Pre-mRNA splicing Prp18-interacting factor
BnaA04T0049700WE	0.0895719	0.31966	-0.0949324	0.149944	0.577007	0.0257783	-0.0537427	0.372505	0.242288	0.108283	-0.126078	0.311733	probable ADP-ribosylation factor GTPase-activating protein AGD6; K12492 ADP-ribosylation factor GTPase-activating protein 1 (A)	Probable ADP-ribosylation factor GTPase-activating protein AGD6 OS=Arabidopsis thaliana GN=AGD6 PE=1 SV=1	Putative GTPase activating protein for Arf
BnaC05T0180300WE	-0.377688	0.030349	-0.151419	0.159241	0.580256	0.00376365	-0.0665767	0.271953	0.373355	0.0274119	0.0400845	0.14374	SORBIDRAFT_10g030940, Sb10g030940; hypothetical protein; K12472 epidermal growth factor receptor substrate 15 (A)	EH domain-containing protein 1 OS=Arabidopsis thaliana GN=EHD1 PE=1 SV=1	EF hand
BnaC05T0547300WE	-0.377993	0.154979	-1.21166	0.0132278	0.582116	0.0268365	0.357277	0.157266	-0.718586	0.0167795	-0.0956594	0.0389459	V-type proton ATPase subunit G1; K02152 V-type H+-transporting ATPase subunit G (A)	V-type proton ATPase subunit G1 OS=Arabidopsis thaliana GN=VHA-G1 PE=2 SV=1	Vacuolar (H+)-ATPase G subunit
BnaA03T0147600WE	0.346153	0.212299	0.855245	0.0301093	0.582527	0.165454	-0.833972	0.0600749	0.646415	0.0484049	0.308596	0.0225445	probable protein phosphatase 2C 76; K17506 protein phosphatase 1L [EC:3.1.3.16] (A)	Probable protein phosphatase 2C 76 OS=Arabidopsis thaliana GN=At5g53140 PE=2 SV=1	short chain dehydrogenase
BnaA07T0149800WE	-0.0299107	0.12061	-0.49518	0.0120493	0.587265	0.0264893	-0.202499	0.351911	-0.0358398	0.301238	-0.215179	0.0952747	--	Uncharacterized protein At2g27730, mitochondrial OS=Arabidopsis thaliana GN=At2g27730 PE=1 SV=1	--
BnaC09T0579300WE	0.895381	0.00542934	-0.404695	0.124406	0.595017	0.147761	-0.281586	0.201033	0.294507	0.00364412	0.550479	0.0243701	syncoilin-like; K19748 RAB6-interacting golgin (A)	--	Transcriptional activator
BnaA05T0135600WE	-0.0440592	0.102159	0.265663	0.0143174	0.600554	0.000464921	-0.0463594	0.299077	0.17013	0.00796725	-0.0942896	0.167114	cyclophilin; K01802 peptidylprolyl isomerase [EC:5.2.1.8] (A)	Peptidyl-prolyl cis-trans isomerase CYP19-4 OS=Arabidopsis thaliana GN=CYP19-4 PE=1 SV=2	Cyclophilin type peptidyl-prolyl cis-trans isomerase/CLD
BnaC07T0321900WE	-0.0961755	0.170131	-0.333767	0.110157	0.604372	0.0217221	0.0664835	0.184665	0.16493	0.228784	0.0524804	0.245413	--	Uncharacterized protein At5g48480 OS=Arabidopsis thaliana GN=At5g48480 PE=1 SV=1	Glyoxalase-like domain
BnaA07T0052600WE	-0.105154	0.219646	0.625539	0.0070499	0.607128	0.0323213	-0.0983167	0.0315698	0.335652	0.0312584	0.398561	0.0511264	peptidase, putative (EC:3.4.21.25); K18443 golgi-specific brefeldin A-resistance guanine nucleotide exchange factor 1 (A)	Subtilisin-like protease SBT1.7 OS=Arabidopsis thaliana GN=SBT1.7 PE=1 SV=1	Peptidase inhibitor I9
BnaA01T0240600WE	-0.0938956	0.352093	-0.165976	0.327437	0.614551	0.0459354	-0.044235	0.210826	0.572403	0.0347288	0.0533252	0.372036	protein CASP; K09313 homeobox protein cut-like (A)	Protein CASP OS=Arabidopsis thaliana GN=CASP PE=1 SV=2	CASP C terminal
BnaC03T0245600WE	-1.14272	0.0749708	0.662455	0.00591936	0.621617	0.0077628	1.22448	0.0397891	0.846397	0.158045	-0.889902	0.251131	transcription initiation factor IIF subunit alpha-like; K03138 transcription initiation factor TFIIF subunit alpha (A)	Transcription initiation factor IIF subunit alpha OS=Arabidopsis thaliana GN=RAP74 PE=1 SV=1	Transcription initiation factor IIF, alpha subunit (TFIIF-alpha)
BnaC09T0009700WE	0.397095	0.0601172	0.31297	0.0974969	0.622088	0.0226201	-0.51066	0.122109	0.410799	0.0510904	0.206336	0.10578	cathepsin B-like; K01363 cathepsin B [EC:3.4.22.1] (A)	Cathepsin B OS=Macaca fascicularis GN=CTSB PE=2 SV=1	Peptidase family C1 propeptide
BnaA03T0358200WE	0.331216	0.176587	0.243944	0.219392	0.630854	0.0404606	-1.16964	0.027048	-0.822105	9.88728e-05	-0.113021	0.19726	disease resistance protein RPM1-like; K13457 disease resistance protein RPM1 (A)	PYK10-binding protein 2 OS=Arabidopsis thaliana GN=PBP2 PE=1 SV=1	Jacalin-like lectin domain
BnaA09T0083500WE	-0.139631	0.077	-0.224259	0.155799	0.6309	0.0454113	0.315091	0.16937	0.257698	0.0693517	0.381835	0.0316207	putative nuclear matrix constituent protein 1-like protein; K00826 branched-chain amino acid aminotransferase [EC:2.6.1.42] (A)	Protein CROWDED NUCLEI 4 OS=Arabidopsis thaliana GN=CRWN4 PE=1 SV=2	--
BnaA05T0321000WE	-0.918389	0.149056	-0.249005	0.23542	0.634762	0.17342	-0.540669	0.0559478	-0.948347	0.0464658	0.091694	0.277854	--	Putative lipid-transfer protein DIR1 OS=Arabidopsis thaliana GN=DIR1 PE=1 SV=1	Probable lipid transfer
BnaA09T0616600WE	0.0221198	0.296316	0.295801	0.0295033	0.653028	0.00533955	0.224437	0.178094	-0.195494	0.104354	0.356301	0.0336145	hypothetical protein; K14962 COMPASS component SWD2 (A)	Epidermis-specific secreted glycoprotein EP1 OS=Daucus carota GN=EP1 PE=1 SV=1	D-mannose binding lectin
BnaA09T0646900WE	-0.54268	0.0899858	-0.219087	0.0182626	0.669399	0.038866	-0.174327	0.211983	-0.136132	0.0350539	0.382125	0.0435158	peroxidase 3-like; K00430 peroxidase [EC:1.11.1.7] (A)	Peroxidase 3 OS=Arabidopsis thaliana GN=PER3 PE=2 SV=1	Peroxidase
BnaA03T0561300WE	-0.396834	0.0324255	0.0631094	0.359129	0.672526	0.0264923	-0.0849279	0.286168	-0.292335	0.0679257	0.217538	0.143056	peroxidase 49; K00430 peroxidase [EC:1.11.1.7] (A)	Peroxidase 49 OS=Arabidopsis thaliana GN=PER49 PE=2 SV=2	Peroxidase
BnaA10T0238900WE	0.31882	0.164289	-0.635208	0.0587934	0.675239	0.0232883	0.0189026	0.345128	0.299638	0.106851	0.781883	0.0200016	cyclin-dependent kinase C-1; K08819 cyclin-dependent kinase 12/13 [EC:2.7.11.22 2.7.11.23] (A)	Cyclin-dependent kinase C-1 OS=Arabidopsis thaliana GN=CDKC-1 PE=1 SV=1	Protein kinase domain
BnaC09T0470500WE	0.349665	0.0608345	-0.4762	0.0901519	0.684279	0.0320023	-0.314449	0.120219	0.546678	0.0321954	0.491321	0.0179971	uncharacterized LOC103874839; K12811 ATP-dependent RNA helicase DDX46/PRP5 [EC:3.6.4.13] (A)	WEB family protein At5g16730, chloroplastic OS=Arabidopsis thaliana GN=At5g16730 PE=1 SV=1	Weak chloroplast movement under blue light
BnaA10T0288200WE	0.252115	0.32379	-0.646677	0.0463661	0.698063	0.0371808	-0.0310653	0.24299	-0.132177	0.247729	-0.397159	0.115055	protein MODIFIER OF SNC1 11-like; K18732 SAP domain-containing ribonucleoprotein (A)	Protein MODIFIER OF SNC1 11 OS=Arabidopsis thaliana GN=MOS11 PE=1 SV=1	--
BnaC09T0259500WE	0.860577	0.0762653	-0.650136	0.0519894	0.704445	0.0682702	-0.165666	0.316042	0.180425	0.231647	-0.562545	0.0426516	plant UBX domain-containing protein 4-like; K14012 UBX domain-containing protein 1 (A)	Plant UBX domain-containing protein 4 OS=Arabidopsis thaliana GN=PUX4 PE=1 SV=1	UBX domain
BnaA03T0240300WE	0.0938238	0.31935	-0.185403	0.120548	0.705936	0.00354054	0.105666	0.211476	-0.123652	0.0534166	0.0118344	0.356361	glutathione S-transferase F8, chloroplastic-like; K00799 glutathione S-transferase [EC:2.5.1.18] (A)	Glutathione S-transferase F8, chloroplastic OS=Arabidopsis thaliana GN=GSTF8 PE=1 SV=3	Glutathione S-transferase, C-terminal domain
BnaC08T0197900WE	0.161749	0.1029	0.0488221	0.248946	0.706292	0.0200812	0.0904828	0.22396	0.102376	0.089431	0.187716	0.0707536	D-3-phosphoglycerate dehydrogenase 2, chloroplastic-like; K00058 D-3-phosphoglycerate dehydrogenase [EC:1.1.1.95] (A)	D-3-phosphoglycerate dehydrogenase 2, chloroplastic OS=Arabidopsis thaliana GN=PGDH2 PE=1 SV=2	ACT domain
BnaA10T0114400WE	-0.304522	0.116245	-0.265903	0.143903	0.711287	0.00191741	0.232085	0.279542	0.327488	0.0295366	0.435701	0.0961489	serine/threonine-protein phosphatase 2A 65 kDa regulatory subunit A beta isoform-like; K03456 serine/threonine-protein phosphatase 2A regulatory subunit A (A)	Fasciclin-like arabinogalactan protein 1 OS=Arabidopsis thaliana GN=FLA1 PE=1 SV=1	Fasciclin domain
BnaA05T0410200WE	-0.311079	0.244791	0.527564	0.0259557	0.716036	0.0264597	-0.417367	0.0469554	0.217364	0.234053	0.836103	0.00136821	hypothetical protein; K19891 glucan endo-1,3-beta-glucosidase 1/2/3 [EC:3.2.1.39] (A)	Probable glucan endo-1,3-beta-glucosidase A6 OS=Arabidopsis thaliana GN=A6 PE=2 SV=1	X8 domain
BnaA03T0192100WE	0.156893	0.0744951	-0.106444	0.330952	0.720001	0.00418146	-0.25668	0.0302132	-0.151009	0.226319	0.00313359	0.0903296	aquaporin PIP2-2-like; K09872 aquaporin PIP (A)	Aquaporin PIP2-2 OS=Arabidopsis thaliana GN=PIP2-2 PE=1 SV=2	Major intrinsic protein
BnaA03T0234800WE	0.025941	0.214257	0.00567239	0.325213	0.720689	0.0151606	-0.0123771	0.300259	-0.204785	0.0919792	0.212688	0.143439	aquaporin PIP1-2-like; K09872 aquaporin PIP (A)	Aquaporin PIP1-2 OS=Arabidopsis thaliana GN=PIP1-2 PE=1 SV=1	Major intrinsic protein
BnaC04T0209600WE	0.0228478	0.310838	0.0554065	0.370929	0.729953	0.0185877	-0.0158517	0.336428	0.213995	0.155719	0.124115	0.115937	hypothetical protein; K16292 KDEL-tailed cysteine endopeptidase [EC:3.4.22.-] (A)	Cysteine proteinase RD21a OS=Arabidopsis thaliana GN=RD21A PE=1 SV=1	Granulin
BnaA09T0172700WE	0.43916	0.0170834	0.258875	0.098141	0.743965	0.0104759	-0.491198	0.121325	0.0736429	0.0484308	0.020869	0.315473	uncharacterized LOC105170420; K20100 YTH domain-containing protein 1 (A)	B2 protein OS=Daucus carota PE=2 SV=1	Development and cell death domain
BnaA03T0393400WE	-0.328742	0.188033	0.193909	0.241466	0.745625	0.0409489	0.324194	0.0302429	0.133283	0.0405085	0.512442	0.0422482	RPM1-interacting protein 4; K13456 RPM1-interacting protein 4 (A)	RPM1-interacting protein 4 OS=Arabidopsis thaliana GN=RIN4 PE=1 SV=1	Cleavage site for pathogenic type III effector avirulence factor Avr
BnaC03T0293600WE	-0.369502	0.0267041	-0.531145	0.0423543	0.754075	0.00434237	-0.199141	0.139379	0.223321	0.15893	0.180254	0.025927	pectin acetylesterase 12-like; K19882 O-palmitoleoyl-L-serine hydrolase [EC:3.1.1.98] (A)	Pectin acetylesterase 12 OS=Arabidopsis thaliana GN=PAE12 PE=2 SV=1	Pectinacetylesterase
BnaA10T0023700WE	-0.15295	0.25096	-0.469446	0.0202336	0.759089	0.0255354	-0.552707	0.0573706	-0.117129	0.133111	0.393374	0.00681121	fasciclin-like arabinogalactan protein 4; K19519 transforming growth factor-beta-induced protein (A)	Fasciclin-like arabinogalactan protein 9 OS=Arabidopsis thaliana GN=FLA9 PE=1 SV=1	Fasciclin domain
BnaA10T0060600WE	-0.18831	0.32022	-0.732376	0.0203819	0.764495	0.00830635	0.115489	0.336669	0.163094	0.166022	-0.396633	0.0562968	RAN GTPase-activating protein 1-like; K14319 Ran GTPase-activating protein 1 (A)	WPP domain-containing protein 2 OS=Arabidopsis thaliana GN=WPP2 PE=1 SV=1	WPP domain
BnaA05T0059900WE	-0.46144	0.0751778	-0.0859125	0.284902	0.76756	0.0257314	-0.69798	0.0706862	0.390376	0.0138422	-0.293029	0.171222	--	Protein FATTY ACID EXPORT 3, chloroplastic OS=Arabidopsis thaliana GN=FAX3 PE=2 SV=2	Transmembrane proteins 14C
BnaA07T0325200WE	-0.046497	0.325555	0.0124055	0.285589	0.76962	0.0182931	-0.342084	0.0434237	-0.0184263	0.346329	0.33202	0.0599426	patellin-3-like; K19996 phosphatidylinositol transfer protein SFH5 (A)	Patellin-1 OS=Arabidopsis thaliana GN=PATL1 PE=1 SV=2	CRAL/TRIO, N-terminal domain
BnaA09T0096000WE	-0.0370063	0.0567568	-0.428648	0.0227276	0.783311	0.00845495	-0.0801603	0.094261	-0.302348	0.0495635	0.314492	0.103659	peroxidase 32; K00430 peroxidase [EC:1.11.1.7] (A)	Peroxidase 32 OS=Arabidopsis thaliana GN=PER32 PE=1 SV=3	Peroxidase
BnaA03T0230400WE	0.278707	0.0171377	-0.835217	0.0241724	0.786721	0.0784271	0.523318	0.0357833	-0.648538	0.0214433	0.680968	0.0454979	--	Uclacyanin-2 OS=Arabidopsis thaliana GN=At2g44790 PE=1 SV=1	Plastocyanin-like domain
BnaC03T0194200WE	1.00303	0.0503118	0.049237	0.21163	0.79288	0.0108273	0.727624	0.0368196	-0.861587	0.0114762	0.408743	0.0747814	--	Uclacyanin-2 OS=Arabidopsis thaliana GN=At2g44790 PE=1 SV=1	Plastocyanin-like domain
BnaC04T0311400WE	0.11114	0.212744	-0.511044	0.110196	0.796996	0.0279451	-0.233056	0.19185	0.169121	0.146977	0.468804	0.0246536	uncharacterized LOC104415567; K17398 DNA (cytosine-5)-methyltransferase 3A [EC:2.1.1.37] (A)	Serine/threonine-protein kinase ATM OS=Arabidopsis thaliana GN=ATM PE=2 SV=1	--
BnaC09T0202000WE	-0.137508	0.104689	-0.145487	0.191306	0.799771	0.0200098	-0.423094	0.102506	-0.00820011	0.381529	0.597341	0.0273491	serine/threonine-protein phosphatase 2A 65 kDa regulatory subunit A beta isoform-like; K03456 serine/threonine-protein phosphatase 2A regulatory subunit A (A)	Fasciclin-like arabinogalactan protein 2 OS=Arabidopsis thaliana GN=FLA2 PE=1 SV=1	Fasciclin domain
BnaA02T0126800WE	-0.291438	0.0257373	-0.199525	0.176598	0.803887	0.0109899	0.0547192	0.211038	0.400773	0.0198974	0.258525	0.0583584	myb-like protein X; K17046 protein DEK (A)	Midasin OS=Giardia intestinalis GN=MDN1 PE=3 SV=1	DEK C terminal domain
BnaA04T0068800WE	0.0993283	0.260037	-0.256076	0.0374258	0.815058	0.0115243	-0.434472	0.131477	-0.405729	0.065951	0.660805	0.116272	clathrin light chain 2-like; K04645 clathrin light chain B (A)	Clathrin light chain 3 OS=Arabidopsis thaliana GN=At3g51890 PE=1 SV=1	Clathrin light chain
BnaC03T0112700WE	-0.236355	0.279123	-1.17868	0.0431891	0.816946	0.196777	0.176485	0.144067	-1.32021	0.0270373	0.110137	0.290994	mediator of RNA polymerase II transcription subunit 37f-like; K09490 heat shock 70kDa protein 5 (A)	Mediator of RNA polymerase II transcription subunit 37f OS=Arabidopsis thaliana GN=MED37F PE=1 SV=2	Hsp70 protein
BnaC02T0298300WE	0.412939	0.0892005	-0.441015	0.110458	0.817735	0.0140817	-0.895362	0.0365072	0.0268692	0.386578	-0.154361	0.224283	--	Alpha-ketoglutarate-dependent dioxygenase alkB homolog 2 OS=Arabidopsis thaliana GN=ALKBH2 PE=2 SV=2	Protein of unknown function (DUF4057)
BnaA01T0269300WE	-0.614271	0.0177616	0.578275	0.0181203	0.843417	0.00217616	0.140345	0.350298	-0.0315988	0.237316	0.202589	0.227356	peptidase, putative (EC:3.4.21.25); K18443 golgi-specific brefeldin A-resistance guanine nucleotide exchange factor 1 (A)	Subtilisin-like protease SBT1.7 OS=Arabidopsis thaliana GN=SBT1.7 PE=1 SV=1	PA domain
BnaA03T0099800WE	-0.0393732	0.268043	0.0787796	0.362897	0.867413	0.00601085	-3.86491	0.285367	1.19863	0.126356	-0.307875	0.266626	tubulin alpha chain-like; K07374 tubulin alpha (A)	Tubulin alpha-5 chain OS=Arabidopsis thaliana GN=TUBA5 PE=1 SV=2	Tubulin/FtsZ family, GTPase domain
BnaA09T0193800WE	-0.0988463	0.188064	0.377946	0.00417507	0.869652	0.0118209	-0.165494	0.199199	0.237858	0.0682162	0.479049	0.0273921	atlastin-like; K17339 atlastin [EC:3.6.5.-] (A)	Interferon-induced guanylate-binding protein 2 OS=Homo sapiens GN=GBP2 PE=1 SV=3	Guanylate-binding protein, C-terminal domain
BnaA10T0195300WE	-0.319446	0.0976725	-0.0167329	0.135777	0.88424	0.0168084	-0.231792	0.0877568	0.154962	0.0632912	-0.193715	0.140388	SART-1 family protein DOT2-like; K11984 U4/U6.U5 tri-snRNP-associated protein 1 (A)	SART-1 family protein DOT2 OS=Arabidopsis thaliana GN=DOT2 PE=1 SV=1	SART-1 family
BnaC05T0467200WE	-0.352053	0.151413	-0.710748	0.0234751	0.887225	0.0141549	-0.736466	0.102608	0.231225	0.0769893	-0.58997	0.0399545	uncharacterized LOC103833603; K19476 vacuolar protein sorting-associated protein IST1 (A)	IST1 homolog OS=Homo sapiens GN=IST1 PE=1 SV=1	Regulator of Vps4 activity in the MVB pathway
BnaA09T0237900WE	-0.528829	0.11002	-0.243918	0.0192012	0.889253	0.0305492	-0.0433769	0.294399	0.0146052	0.382137	0.455863	0.0316568	peroxidase 39; K00430 peroxidase [EC:1.11.1.7] (A)	Peroxidase 39 OS=Arabidopsis thaliana GN=PER39 PE=1 SV=1	Peroxidase
BnaC02T0243900WE	-0.142626	0.238181	-0.0224228	0.208284	0.8956	0.00423699	-0.779329	0.0284529	-0.957045	0.00568144	-0.125963	0.259253	--	MLP-like protein 28 OS=Arabidopsis thaliana GN=MLP28 PE=1 SV=1	Pathogenesis-related protein Bet v I family
BnaC03T0429600WE	-0.305946	0.310802	-0.468357	0.00768695	0.895745	0.0121364	0.405173	0.309437	-0.111018	0.148154	0.121847	0.280356	GRMZM2G410991; uncharacterized LOC100384051; K13473 chitin elicitor-binding protein (A)	LysM domain-containing GPI-anchored protein 2 OS=Arabidopsis thaliana GN=LYM2 PE=1 SV=1	LysM domain
BnaA08T0096800WE	-0.033137	0.0846053	0.224944	0.0909911	0.907163	0.00255922	-0.0409198	0.373925	0.330237	0.0942772	0.239306	0.0515331	replication protein A 70 kDa DNA-binding subunit C-like; K07466 replication factor A1 (A)	--	Agenet domain
BnaC05T0379600WE	0.258785	0.0494844	0.106238	0.117518	0.91612	0.018334	-0.0388411	0.264764	-0.300199	0.00357275	0.0242467	0.31489	hypothetical protein; K16292 KDEL-tailed cysteine endopeptidase [EC:3.4.22.-] (A)	Cysteine proteinase RD21a OS=Arabidopsis thaliana GN=RD21A PE=1 SV=1	Granulin
BnaA02T0010200WE	0.289811	0.141341	0.214812	0.133135	0.926434	0.0764468	-1.19113	0.0204589	0.638353	0.0185841	0.445097	0.0266463	fasciclin-like arabinogalactan protein 4; K19519 transforming growth factor-beta-induced protein (A)	Fasciclin-like arabinogalactan protein 11 OS=Arabidopsis thaliana GN=FLA11 PE=2 SV=2	Fasciclin domain
BnaA06T0092300WE	0.0630892	0.165251	0.704892	0.0336835	0.935365	0.0108314	0.207083	0.364788	0.533065	0.00579687	0.953579	0.0135275	protein gar2; K14411 RNA-binding protein Musashi (A)	Protein IQ-DOMAIN 31 OS=Arabidopsis thaliana GN=IQD31 PE=1 SV=1	IQ calmodulin-binding motif
BnaC07T0112600WE	-0.0699045	0.0144469	0.0627579	0.266809	0.947143	0.0068328	-0.462641	0.0394485	0.105648	0.198288	0.555482	0.0181218	patellin-4-like; K19996 phosphatidylinositol transfer protein SFH5 (A)	Patellin-4 OS=Arabidopsis thaliana GN=PATL4 PE=1 SV=2	CRAL/TRIO, N-terminal domain
Bnascaffold286T0057500WE	-0.110519	0.222269	0.152216	0.182414	0.955336	0.0226907	-0.0731384	0.176072	0.159544	0.379328	0.260058	0.0531671	sister chromatid cohesion protein PDS5 homolog A-A-like; K11267 sister chromatid cohesion protein PDS5 (A)	Sister chromatid cohesion protein PDS5 OS=Saccharomyces cerevisiae (strain ATCC 204508 / S288c) GN=PDS5 PE=1 SV=1	--
BnaC04T0053100WE	-0.367095	0.274097	-0.3396	0.047798	0.958054	0.03618	-0.419974	0.0432867	-0.628576	0.000288971	0.326859	0.0503772	NEFM, NEF3; neurofilament, medium polypeptide; K04573 neurofilament medium polypeptide (neurofilament 3) (A)	Uclacyanin-2 OS=Arabidopsis thaliana GN=At2g44790 PE=1 SV=1	Plastocyanin-like domain
BnaA03T0396800WE	-0.330431	0.0656204	-0.145929	0.134815	0.966696	0.00821116	-0.35982	0.0323555	-0.200591	0.0884816	0.465528	0.0190791	serine/threonine-protein phosphatase 2A 65 kDa regulatory subunit A beta isoform-like; K03456 serine/threonine-protein phosphatase 2A regulatory subunit A (A)	Fasciclin-like arabinogalactan protein 7 OS=Arabidopsis thaliana GN=FLA7 PE=1 SV=1	Fasciclin domain
BnaA06T0451600WE	-0.506662	0.0816885	0.299484	0.061843	0.968146	0.013043	-1.27945	0.0187401	0.135682	0.173018	-0.108585	0.372386	probable ADP-ribosylation factor GTPase-activating protein AGD9; K12493 ADP-ribosylation factor GTPase-activating protein 2/3 (A)	Probable ADP-ribosylation factor GTPase-activating protein AGD9 OS=Arabidopsis thaliana GN=AGD9 PE=1 SV=1	Putative GTPase activating protein for Arf
BnaA09T0229800WE	0.374379	0.0654469	-0.668482	0.0521066	0.99491	0.00143314	-0.559829	0.0314639	0.395435	0.0325277	0.21266	0.14765	--	--	--
BnaA10T0114200WE	0.12934	0.0856714	0.416595	0.0152629	0.997465	0.0153847	-0.0570646	0.36235	0.020681	0.145427	0.176693	0.125033	glutamic acid-rich protein-like; K17046 protein DEK (A)	Protein DEK OS=Homo sapiens GN=DEK PE=1 SV=1	DEK C terminal domain
BnaA02T0215400WE	0.166064	0.178828	0.300021	0.0556485	1.00837	0.03477	0.514948	0.00307228	-1.44281	0.0177959	0.476823	0.132832	hypothetical protein; K11253 histone H3 (A)	Histone H3.3 OS=Vitis vinifera PE=2 SV=3	Core histone H2A/H2B/H3/H4
BnaA02T0101300WE	-0.102918	0.29185	-0.146155	0.249109	1.03247	0.0258528	0.0371253	0.223738	0.154305	0.260862	0.620369	0.0258987	thiol protease aleurain-like; K01366 cathepsin H [EC:3.4.22.16] (A)	Thiol protease aleurain OS=Arabidopsis thaliana GN=ALEU PE=1 SV=2	Cathepsin propeptide inhibitor domain (I29)
BnaA08T0220400WE	0.0852083	0.362152	-0.327803	0.0544189	1.0357	0.0334042	-0.202308	0.0402688	-0.0602621	0.229141	0.861958	0.0280532	GRMZM2G410991; uncharacterized LOC100384051; K13473 chitin elicitor-binding protein (A)	LysM domain-containing GPI-anchored protein 1 OS=Arabidopsis thaliana GN=LYM1 PE=1 SV=1	LysM domain
BnaA07T0092800WE	-0.332753	0.0253467	-0.528387	0.00975626	1.04456	0.0948499	0.3369	0.36902	0.155972	0.175046	0.188789	0.241946	hypothetical protein; K04426 mitogen-activated protein kinase kinase kinase 5 [EC:2.7.11.25] (A)	Non-classical arabinogalactan protein 30 OS=Arabidopsis thaliana GN=AGP30 PE=2 SV=1	Pollen proteins Ole e I like
BnaA08T0174500WE	0.491402	0.0454454	-0.35414	0.136415	1.06262	0.00946864	-0.526987	0.0799497	0.0345654	0.323917	-0.154466	0.325022	apoptotic chromatin condensation inducer in the nucleus-like; K12875 apoptotic chromatin condensation inducer in the nucleus (A)	Apoptotic chromatin condensation inducer in the nucleus OS=Homo sapiens GN=ACIN1 PE=1 SV=2	SAP domain
BnaA09T0076200WE	-0.0899669	0.152396	0.19037	0.147506	1.06533	0.00516616	-0.21321	0.118504	0.193243	0.0835809	0.307298	0.156654	DNA ligase 1-like; K17046 protein DEK (A)	--	DEK C terminal domain
BnaA04T0058000WE	-0.1027	0.278836	-0.274682	0.0766326	1.06888	0.00404446	-0.787415	0.108134	-0.0165433	0.367308	0.353603	0.116772	probable ADP-ribosylation factor GTPase-activating protein AGD14; K15044 Arf-GAP domain and FG repeats-containing protein 1 (A)	Probable ADP-ribosylation factor GTPase-activating protein AGD14 OS=Arabidopsis thaliana GN=AGD14 PE=1 SV=2	Putative GTPase activating protein for Arf
BnaA09T0486800WE	-0.162903	0.313905	-0.330682	0.233062	1.08694	0.032418	-0.51221	0.121152	0.147258	0.125446	-0.150481	0.220423	ferritin-1; K00522 ferritin heavy chain [EC:1.16.3.2] (A)	Ferritin-3, chloroplastic OS=Arabidopsis thaliana GN=FER3 PE=2 SV=1	Ferritin-like domain
BnaA07T0126200WE	-0.390609	0.200546	-0.417948	0.0675545	1.08884	0.0604296	-0.877798	0.12736	-1.05684	0.0272451	0.0526623	0.135845	--	Dehydrin ERD10 OS=Arabidopsis thaliana GN=ERD10 PE=1 SV=1	Dehydrin
BnaA08T0152700WE	-0.267421	0.174743	0.0911562	0.343541	1.14199	0.0187465	0.0970159	0.239993	0.452799	0.199952	0.102258	0.180591	myb-like protein X; K17046 protein DEK (A)	Protein DEK OS=Homo sapiens GN=DEK PE=1 SV=1	DEK C terminal domain
BnaC06T0405600WE	-0.0838423	0.140445	0.213289	0.0799951	1.14248	0.0117085	-0.00536982	0.271553	0.0227649	0.379455	0.437956	0.0890096	POPTRDRAFT_738169; hypothetical protein; K19996 phosphatidylinositol transfer protein SFH5 (A)	Patellin-1 OS=Arabidopsis thaliana GN=PATL1 PE=1 SV=2	CRAL/TRIO, N-terminal domain
BnaA05T0422300WE	0.254482	0.14048	-0.592238	0.0746243	1.14358	0.0336262	-0.265157	0.0290479	0.123151	0.0786683	0.48582	0.0271252	chromodomain-helicase-DNA-binding protein 8; K14437 chromodomain-helicase-DNA-binding protein 7 [EC:3.6.4.12] (A)	--	--
BnaA09T0426400WE	0.42515	0.0221745	0.260706	0.146565	1.15033	0.00640421	0.371825	0.0144959	-0.25962	0.0430193	0.3034	0.0454209	--	MLP-like protein 31 OS=Arabidopsis thaliana GN=MLP31 PE=2 SV=2	Pathogenesis-related protein Bet v I family
BnaC04T0489400WE	-0.400147	0.299698	0.157865	0.248973	1.15099	0.0165348	0.162957	0.0849574	-1.65875	0.00800692	0.0542751	0.228065	histone H1.2-like; K11275 histone H1/5 (A)	Histone H1.2 OS=Arabidopsis thaliana GN=At2g30620 PE=1 SV=1	linker histone H1 and H5 family
BnaA06T0163700WE	0.0530015	0.315294	0.140146	0.245115	1.15594	0.00370933	-0.103108	0.318764	0.608927	0.0482231	0.0677464	0.0910492	KDEL-tailed cysteine endopeptidase CEP2; K16292 KDEL-tailed cysteine endopeptidase [EC:3.4.22.-] (A)	KDEL-tailed cysteine endopeptidase CEP2 OS=Arabidopsis thaliana GN=CEP2 PE=2 SV=1	Cathepsin propeptide inhibitor domain (I29)
BnaC08T0350700WE	0.0918303	0.0658406	-0.490554	0.0692231	1.16121	0.0243764	-0.00928066	0.226704	-0.0383636	0.242207	0.0401993	0.317033	--	Uncharacterized protein At3g61260 OS=Arabidopsis thaliana GN=At3g61260 PE=1 SV=1	Remorin, N-terminal region
BnaC02T0364000WE	0.0322514	0.374325	0.139515	0.220399	1.16563	0.0112968	0.169343	0.143322	0.0560306	0.37247	0.056645	0.23836	hypothetical protein; K16292 KDEL-tailed cysteine endopeptidase [EC:3.4.22.-] (A)	Cysteine proteinase RD21a OS=Arabidopsis thaliana GN=RD21A PE=1 SV=1	Granulin
BnaC07T0242400WE	-0.121316	0.140662	0.861964	0.0196819	1.16755	0.0058171	-0.525236	0.0386524	0.0103145	0.306085	0.724931	0.0521082	atlastin-like; K17339 atlastin [EC:3.6.5.-] (A)	Interferon-induced guanylate-binding protein 2 OS=Homo sapiens GN=GBP2 PE=1 SV=3	Guanylate-binding protein, C-terminal domain
BnaA01T0216700WE	-0.836619	0.206013	-0.305568	0.0659452	1.18058	0.032075	0.299603	0.073344	0.20639	0.14058	0.662131	0.0521343	--	Protein YLS3 OS=Arabidopsis thaliana GN=YLS3 PE=2 SV=1	Probable lipid transfer
BnaC09T0524700WE	-0.0467296	0.175132	0.230878	0.334926	1.18871	0.00866318	0.0610574	0.120312	-0.155683	0.0873385	0.592249	0.0248186	beta-xylosidase/alpha-L-arabinofuranosidase 2-like; K15920 beta-D-xylosidase 4 [EC:3.2.1.37] (A)	Probable beta-D-xylosidase 6 OS=Arabidopsis thaliana GN=BXL6 PE=2 SV=1	Fibronectin type III-like domain
BnaA02T0105500WE	-0.206963	0.190248	0.163442	0.21021	1.21996	0.0211932	0.134575	0.124125	-1.28504	0.0134928	0.156735	0.223618	hypothetical protein; K11254 histone H4 (A)	Histone H4 OS=Glycine max PE=3 SV=1	Core histone H2A/H2B/H3/H4
BnaA08T0106900WE	-0.280566	0.347025	-0.00134249	0.304614	1.23851	0.00711862	0.246982	0.12359	0.18741	0.215785	0.431036	0.109301	peptide methionine sulfoxide reductase B9-like; K07305 peptide-methionine (R)-S-oxide reductase [EC:1.8.4.12] (A)	Peptide methionine sulfoxide reductase B9 OS=Arabidopsis thaliana GN=MSRB9 PE=2 SV=1	SelR domain
BnaA07T0239200WE	-1.11583	0.0271765	-0.0909337	0.0933993	1.24122	0.00160905	0.328969	0.0709756	0.301571	0.0371603	0.0674934	0.244332	--	Dehydrin ERD14 OS=Arabidopsis thaliana GN=ERD14 PE=1 SV=1	Dehydrin
BnaC09T0536100WE	-0.1694	0.371369	-0.151004	0.160826	1.25127	0.0204985	-0.32486	0.0135852	-0.121144	0.135239	0.00919754	0.296292	vacuolar protein sorting-associated protein 20 homolog 2; K12195 charged multivesicular body protein 6 (A)	Vacuolar protein sorting-associated protein 20 homolog 2 OS=Arabidopsis thaliana GN=VPS20.2 PE=1 SV=1	Snf7
BnaC09T0113900WE	-0.940718	0.0152055	0.0364947	0.358336	1.25458	0.0254546	-0.847068	0.0112003	-0.680811	0.0033959	-0.443331	0.175132	peroxidase 32-like; K00430 peroxidase [EC:1.11.1.7] (A)	Peroxidase 32 OS=Arabidopsis thaliana GN=PER32 PE=1 SV=3	GDSL/SGNH-like Acyl-Esterase family found in Pmr5 and Cas1p
BnaA04T0262800WE	-0.274949	0.266437	-0.125702	0.348774	1.25493	0.0605875	-0.903344	0.0209957	-3.07395	0.0263648	0.731551	0.154939	hcn4; hyperpolarization activated cyclic nucleotide gated potassium channel 4; K04956 hyperpolarization activated cyclic nucleotide-gated potassium channel 3 (A)	KH domain-containing protein 3 OS=Rattus norvegicus GN=Khdc3 PE=3 SV=1	Pollen proteins Ole e I like
BnaA02T0387100WE	-0.044142	0.379305	-0.810536	0.0397482	1.26487	0.0232098	0.014476	0.22385	-0.156371	0.0176832	0.682848	0.0246879	glucan endo-1,3-beta-glucosidase 3; K19891 glucan endo-1,3-beta-glucosidase 1/2/3 [EC:3.2.1.39] (A)	PLASMODESMATA CALLOSE-BINDING PROTEIN 1 OS=Arabidopsis thaliana GN=PDCB1 PE=1 SV=1	X8 domain
BnaA09T0109100WE	0.460778	0.160759	0.315475	0.0119735	1.27564	0.00757001	-0.152479	0.385799	0.59264	0.0538398	0.213074	0.125279	--	Calmodulin-binding protein 60 C OS=Arabidopsis thaliana GN=CBP60C PE=2 SV=1	Calmodulin binding protein-like
BnaA09T0520800WE	-0.110379	0.365996	-0.210177	0.144582	1.27704	0.0236398	-0.206379	0.127343	0.0277387	0.275473	0.4807	0.0426096	serine/threonine-protein phosphatase 2A 65 kDa regulatory subunit A beta isoform-like; K03456 serine/threonine-protein phosphatase 2A regulatory subunit A (A)	Fasciclin-like arabinogalactan protein 10 OS=Arabidopsis thaliana GN=FLA10 PE=1 SV=1	Fasciclin domain
BnaA05T0358200WE	-0.120172	0.0541792	0.297771	0.0055531	1.28771	0.0059816	0.306994	0.0389491	-0.124113	0.139461	0.789218	0.0563255	pectinesterase/pectinesterase inhibitor 3; K01051 pectinesterase [EC:3.1.1.11] (A)	Pectinesterase/pectinesterase inhibitor 3 OS=Arabidopsis thaliana GN=PME3 PE=2 SV=2	Plant invertase/pectin methylesterase inhibitor
BnaC04T0107300WE	0.482169	0.03236	0.413158	0.0439733	1.28858	0.0492706	-0.0987169	0.331047	0.952137	0.0167443	0.878693	0.0648107	--	Protein WAVE-DAMPENED 2 OS=Arabidopsis thaliana GN=WVD2 PE=2 SV=1	Targeting protein for Xklp2 (TPX2)
BnaA04T0218600WE	-1.4352	0.014396	-0.34164	0.0923868	1.28895	0.0263699	-0.488003	0.159216	-0.519602	0.0289234	0.94023	0.0305604	STAB2; stabilin 2; K19013 stabilin-2 (A)	Fasciclin-like arabinogalactan protein 16 OS=Arabidopsis thaliana GN=FLA16 PE=2 SV=1	Fasciclin domain
BnaC05T0163200WE	-0.0404499	0.112895	0.232007	0.13379	1.30106	0.0149629	-0.748873	0.0344406	0.451564	0.0792926	0.666627	0.0202064	protein gar2; K14411 RNA-binding protein Musashi (A)	Protein IQ-DOMAIN 32 OS=Arabidopsis thaliana GN=IQD32 PE=1 SV=3	Protein of unknown function (DUF4005)
BnaC02T0060900WE	-0.787837	0.10276	0.0711769	0.175694	1.31008	0.0393731	-0.238476	0.211854	-0.556338	0.0777463	0.344875	0.0920979	peroxidase 56-like; K00430 peroxidase [EC:1.11.1.7] (A)	Peroxidase 56 OS=Arabidopsis thaliana GN=PER56 PE=2 SV=1	Peroxidase
BnaA04T0072300WE	-0.878025	0.0579305	-0.291363	0.0876097	1.31382	0.00866484	0.180061	0.279784	-0.200818	0.325637	0.371644	0.0703095	STAB2; stabilin 2; K19013 stabilin-2 (A)	Fasciclin-like arabinogalactan protein 15 OS=Arabidopsis thaliana GN=FLA15 PE=2 SV=1	Fasciclin domain
BnaA07T0354800WE	-0.112557	0.232461	-0.263293	0.0501764	1.3258	0.00986072	0.096894	0.211538	-0.171362	0.0165614	0.0767975	0.301814	--	Dehydrin ERD14 OS=Arabidopsis thaliana GN=ERD14 PE=1 SV=1	Dehydrin
BnaC08T0182500WE	0.339586	0.0665603	-0.344692	0.243212	1.32617	0.0492851	-0.16984	0.230532	0.710554	0.00255314	0.399303	0.0484725	--	--	--
BnaC08T0387300WE	0.182139	0.1377	-0.56255	0.0602945	1.34435	0.0176756	-0.818091	0.0517701	0.234723	0.0949797	-0.526146	0.122534	--	--	Late embryogenesis abundant protein 18
BnaA02T0196200WE	-0.346204	0.0557677	0.304373	0.0305214	1.35604	0.00668683	0.457973	0.027553	0.147519	0.237239	0.442118	0.116018	patellin-5-like; K19996 phosphatidylinositol transfer protein SFH5 (A)	Patellin-3 OS=Arabidopsis thaliana GN=PATL3 PE=1 SV=2	CRAL/TRIO, N-terminal domain
BnaC04T0167200WE	-0.31937	0.0363817	0.0592433	0.387974	1.3658	0.0292674	0.00439542	0.0676991	-0.460795	0.0314781	0.183661	0.125517	histone H1.2-like; K11275 histone H1/5 (A)	Histone H1.2 OS=Arabidopsis thaliana GN=At2g30620 PE=1 SV=1	linker histone H1 and H5 family
BnaC01T0310600WE	-0.0782027	0.259607	0.442595	0.00572218	1.37464	0.00789679	0.298037	0.0990932	-0.168135	0.11539	0.705867	0.066683	peroxidase 30; K00430 peroxidase [EC:1.11.1.7] (A)	Peroxidase 30 OS=Arabidopsis thaliana GN=PER30 PE=1 SV=1	Peroxidase
BnaC05T0188800WE	-0.075536	0.24034	0.206159	0.252555	1.39025	0.00159827	-0.100393	0.318216	0.193158	0.262598	0.738376	0.0383955	POPTRDRAFT_738169; hypothetical protein; K19996 phosphatidylinositol transfer protein SFH5 (A)	Patellin-2 OS=Arabidopsis thaliana GN=PATL2 PE=1 SV=2	CRAL/TRIO, N-terminal domain
BnaC01T0359800WE	-0.532884	0.198218	0.900857	0.109216	1.41595	0.0339376	0.166146	0.335359	-0.102593	0.25892	0.612226	0.0596504	--	Methyl-CpG-binding domain-containing protein 11 OS=Arabidopsis thaliana GN=MBD11 PE=1 SV=1	Methyl-CpG binding domain
BnaA09T0184900WE	0.192194	0.00925314	-0.242692	0.13838	1.42186	0.0165209	0.324623	0.162663	0.0840287	0.173232	0.648461	0.0125826	fasciclin-like arabinogalactan protein 4; K19519 transforming growth factor-beta-induced protein (A)	Fasciclin-like arabinogalactan protein 13 OS=Arabidopsis thaliana GN=FLA13 PE=1 SV=1	Fasciclin domain
BnaA03T0091900WE	-0.168163	0.296675	0.156642	0.121503	1.44661	0.0138179	-1.06806	0.00106295	-0.0191427	0.0163464	-0.41678	0.178612	--	--	--
BnaA03T0504300WE	0.424408	0.0589183	0.44461	0.155451	1.45042	0.0168042	0.330874	0.107092	-0.159413	0.344954	0.708342	0.0853308	glutamine-rich protein 2-like; K19926 zona pellucida sperm-binding protein 1 (A)	Early nodulin-like protein 2 OS=Arabidopsis thaliana GN=At4g27520 PE=1 SV=1	Plastocyanin-like domain
BnaA07T0032500WE	-0.913084	0.150881	0.171951	0.128857	1.46578	0.00573424	0.0676858	0.153818	0.19955	0.248129	0.823389	0.14808	Os03g0133400; K13473 chitin elicitor-binding protein (A)	LysM domain-containing GPI-anchored protein 2 OS=Arabidopsis thaliana GN=LYM2 PE=1 SV=1	LysM domain
BnaA08T0246100WE	0.485156	0.217611	-0.164834	0.292258	1.51099	0.0201078	0.442468	0.132303	-0.29535	0.0555089	0.584745	0.140168	GK22253 gene product from transcript GK22253-RB; K14572 midasin (A)	Methyl-CpG-binding domain-containing protein 10 OS=Arabidopsis thaliana GN=MBD10 PE=1 SV=1	Methyl-CpG binding domain
BnaA09T0522800WE	-0.0734678	0.331753	-0.656084	0.0274423	1.55021	0.0167643	0.0103855	0.35601	-0.0551807	0.300509	0.409791	0.0648692	--	Uncharacterized protein At3g61260 OS=Arabidopsis thaliana GN=At3g61260 PE=1 SV=1	Remorin, N-terminal region
BnaA08T0045300WE	-0.0990908	0.161086	0.15965	0.199326	1.60055	0.0121768	0.60683	0.00704278	0.246797	0.263727	0.381638	0.122248	hypothetical protein; K16292 KDEL-tailed cysteine endopeptidase [EC:3.4.22.-] (A)	Cysteine proteinase RD21a OS=Arabidopsis thaliana GN=RD21A PE=1 SV=1	Granulin
BnaC06T0314200WE	0.143934	0.363447	-0.492582	0.0310273	1.6342	0.00794104	0.0696071	0.256798	0.0781304	0.153918	0.00594198	0.191889	patellin-5-like; K19996 phosphatidylinositol transfer protein SFH5 (A)	Patellin-3 OS=Arabidopsis thaliana GN=PATL3 PE=1 SV=2	CRAL/TRIO, N-terminal domain
BnaA01T0088900WE	0.502387	0.0273053	-0.128003	0.301547	1.66569	0.0264163	0.0656137	0.159742	-0.106333	0.181155	0.974106	0.0467087	Muc2, 2010015E03Rik, MCM, wnn; mucin 2; K10955 intestinal mucin-2 (A)	Early nodulin-like protein 2 OS=Arabidopsis thaliana GN=At4g27520 PE=1 SV=1	Plastocyanin-like domain
BnaA06T0416400WE	-0.083652	0.381682	-0.956896	0.00323872	1.72277	0.00290546	0.188465	0.358493	-0.541113	0.0626453	0.463264	0.0872501	--	Mavicyanin OS=Cucurbita pepo PE=1 SV=1	Plastocyanin-like domain
BnaA02T0196100WE	-0.354677	0.0030517	0.192649	0.105935	1.73338	0.0192951	0.118939	0.231083	-0.135316	0.09697	0.563923	0.122247	patellin-3-like; K19996 phosphatidylinositol transfer protein SFH5 (A)	Patellin-1 OS=Arabidopsis thaliana GN=PATL1 PE=1 SV=2	CRAL/TRIO, N-terminal domain
BnaA06T0140500WE	-0.335678	0.0100109	-0.659938	0.0301942	1.78081	0.00311288	-0.448661	0.0872992	0.313062	0.00663399	0.308298	0.0284741	--	Dehydrin ERD10 OS=Arabidopsis thaliana GN=ERD10 PE=1 SV=1	Dehydrin
BnaC02T0252500WE	-0.0659978	0.152401	0.191854	0.147585	1.79272	0.0204275	0.0494758	0.384159	0.0164134	0.383764	1.14396	0.0525357	hypothetical protein; K19996 phosphatidylinositol transfer protein SFH5 (A)	Patellin-1 OS=Arabidopsis thaliana GN=PATL1 PE=1 SV=2	CRAL/TRIO, N-terminal domain
BnaA04T0186800WE	-0.415914	0.179277	0.100585	0.341851	1.79561	0.0218987	0.339362	0.0156653	-0.955501	0.00531073	0.24128	0.257938	histone H1.2; K11275 histone H1/5 (A)	Histone H1.2 OS=Arabidopsis thaliana GN=At2g30620 PE=1 SV=1	linker histone H1 and H5 family
BnaA03T0011500WE	0.249002	0.0624986	-0.16922	0.259252	1.80612	0.0131336	-0.128697	0.196673	0.370371	0.0576568	0.0854322	0.239371	Fer1; ferritin-1, chloroplastic; K00522 ferritin heavy chain [EC:1.16.3.2] (A)	Ferritin-1, chloroplastic OS=Brassica napus GN=LSC30 PE=2 SV=1	Ferritin-like domain
BnaC04T0592600WE	0.0984343	0.0538094	-0.0498578	0.361309	1.83367	0.0246919	-0.127034	0.159929	-0.0720214	0.271265	0.705846	0.0460577	--	Remorin OS=Arabidopsis thaliana GN=DBP PE=1 SV=1	Remorin, N-terminal region
BnaC06T0291300WE	-0.742137	0.0391166	0.0672269	0.314971	1.84883	0.012188	-0.111163	0.190285	0.705676	0.020129	-0.26984	0.184076	--	Dehydrin ERD14 OS=Arabidopsis thaliana GN=ERD14 PE=1 SV=1	Dehydrin
BnaA05T0042500WE	-0.109067	0.0952599	-0.311639	0.0624985	1.8658	0.00896933	-0.640012	0.0960298	-0.0128825	0.353578	0.155885	0.223004	serine/threonine-protein phosphatase 2A 65 kDa regulatory subunit A beta isoform-like; K03456 serine/threonine-protein phosphatase 2A regulatory subunit A (A)	Fasciclin-like arabinogalactan protein 8 OS=Arabidopsis thaliana GN=FLA8 PE=1 SV=1	Fasciclin domain
BnaC06T0439800WE	-0.635675	0.0732178	0.264101	0.225578	1.88444	0.0141377	-0.572903	0.031804	0.353986	0.0256583	-0.76202	0.0152688	--	Dehydrin ERD14 OS=Arabidopsis thaliana GN=ERD14 PE=1 SV=1	Dehydrin
BnaC01T0104600WE	-0.0278057	0.3595	-0.396274	0.123048	1.98639	0.0230875	0.0921421	0.285524	-0.0506237	0.37004	1.04497	0.0470453	--	Plasma membrane-associated cation-binding protein 1 OS=Arabidopsis thaliana GN=PCAP1 PE=1 SV=1	DREPP plasma membrane polypeptide
BnaC02T0029600WE	-0.842514	0.159435	0.0491322	0.285429	2.04725	0.0110002	0.0290217	0.251786	0.622347	0.0815383	0.641534	0.0554498	GFAP; glial fibrillary acidic protein; K05640 glial fibrillary acidic protein (A)	Periaxin OS=Homo sapiens GN=PRX PE=1 SV=2	--
BnaA06T0351200WE	-0.576085	0.0488626	-0.302047	0.32923	2.11565	0.0295158	0.169295	0.0106917	-0.183535	0.128829	0.281872	0.15253	Os03g0133400; K13473 chitin elicitor-binding protein (A)	LysM domain-containing GPI-anchored protein 2 OS=Arabidopsis thaliana GN=LYM2 PE=1 SV=1	LysM domain
BnaA04T0275900WE	0.187438	0.0965561	-0.225225	0.284476	2.20749	0.0165532	-0.0794253	0.366413	0.129414	0.357336	0.957994	0.0397201	--	Remorin OS=Arabidopsis thaliana GN=DBP PE=1 SV=1	Remorin, N-terminal region
BnaC04T0062100WE	0.0068975	0.180385	0.118971	0.321489	2.43623	0.0307791	-0.165333	0.234694	-0.0268438	0.370663	1.36189	0.0463852	--	Remorin OS=Arabidopsis thaliana GN=DBP PE=1 SV=1	Remorin, N-terminal region
BnaA10T0060800WE	-0.238894	0.0320743	0.333231	0.108437	2.43661	0.0118635	-0.483329	0.0953007	0.154187	0.30708	0.511311	0.112504	hypothetical protein; K16292 KDEL-tailed cysteine endopeptidase [EC:3.4.22.-] (A)	Cysteine proteinase RD21a OS=Arabidopsis thaliana GN=RD21A PE=1 SV=1	Granulin
BnaA04T0022600WE	0.339507	0.248593	-0.256447	0.267631	2.56446	0.0278232	0.179048	0.023102	-0.214115	0.170261	1.44246	0.0321768	--	Protein YLS3 OS=Arabidopsis thaliana GN=YLS3 PE=2 SV=1	Probable lipid transfer
BnaA04T0048400WE	-0.0406533	0.388342	0.335083	0.154379	2.85711	0.0211058	-0.947794	0.0250575	1.5192	0.0158285	0.762369	0.161356	--	--	Probable lipid transfer
BnaA08T0294900WE	-3.39078	0.0531176	-2.84483	0.084548	3.52414	0.0288884	0.870998	0.000379246	-3.22582	0.0239925	-0.549201	0.191964	40S ribosomal protein S15-1; K02958 small subunit ribosomal protein S15e (A)	40S ribosomal protein S15-1 OS=Arabidopsis thaliana GN=RPS15A PE=2 SV=1	Ribosomal protein S19

## Sheet: (C) Commom protein IDs
Table S8 C. Protein that were common in two earlier studies [10, 17]. These proteins were observed in early stage infection study based on transcriptome (10) and late stage infection study based on proteome [18]. This list of proteins were significantly differentially abundant in one or more times points in the current study. The values at different time points indicate the log2 fold change betwe…
Proteins	Log2 fold change Res1T.C	Qvalue Res1T.C	Log2 fold change Res4T.C	Qvalue Res4T.C	Log2 fold change Res7T.C	Qvalue Res7T.C	Log2 fold change Sus1T.C	Qvalue Sus1T.C	Log2 fold change Sus4T.C	Qvalue Sus4T.C	Log2 fold change Sus7T.C	Qvalue Sus7T.C	KEGG	Swissprot	Pfam
BnaA08T0284200WE	0.416355	0.125038	-0.709125	0.00759206	-1.07337	0.00540492	-0.38263	0.121725	-0.0299866	0.0233814	0.450373	0.0882835	ran-binding protein 1 homolog a-like; K15306 Ran-binding protein 1 (A)	Ran-binding protein 1 homolog a OS=Arabidopsis thaliana GN=RANBP1A PE=1 SV=1	RanBP1 domain
BnaA08T0185000WE	-0.13295	0.0725625	-0.74319	0.00423486	-0.912606	0.00017539	-0.192279	0.215517	-0.0245167	0.331776	-0.0216936	0.357533	elongation factor 1-delta 1-like; K03232 elongation factor 1-beta (A)	Elongation factor 1-delta 2 OS=Arabidopsis thaliana GN=At2g18110 PE=1 SV=1	EF-1 guanine nucleotide exchange domain
BnaC06T0460800WE	-0.0995277	0.332956	-0.169923	0.341308	-0.835039	0.0816832	-0.400283	0.0622622	-0.413434	0.0254585	-0.188543	0.00819346	hypothetical protein; K14962 COMPASS component SWD2 (A)	Epidermis-specific secreted glycoprotein EP1 OS=Daucus carota GN=EP1 PE=1 SV=1	D-mannose binding lectin
BnaC03T0083500WE	-0.25159	0.106421	-0.103322	0.149834	-0.704204	0.00773505	-0.760847	0.0160923	0.416994	0.0342611	0.383047	0.288031	dihydrolipoyllysine-residue succinyltransferase component of 2-oxoglutarate dehydrogenase complex 1, mitochondrial-like; K00658 2-oxoglutarate dehydrogenase E2 component (dihydrolipoamide succinyltransferase) [EC:2.3.1.61] (A)	Dihydrolipoyllysine-residue succinyltransferase component of 2-oxoglutarate dehydrogenase complex 1, mitochondrial OS=Arabidopsis thaliana GN=At5g55070 PE=2 SV=1	Biotin-requiring enzyme
BnaA08T0098300WE	0.275412	0.0989405	-0.83766	0.00850191	-0.686806	0.00639795	-0.0975313	0.310172	-0.0227013	0.385045	-0.195231	0.0291326	probable H/ACA ribonucleoprotein complex subunit 1; K13199 plasminogen activator inhibitor 1 RNA-binding protein (A)	--	Stm1
BnaA08T0182400WE	-0.314909	0.0927929	-0.587082	0.0622857	-0.33306	0.0756046	0.30253	0.233	0.253586	0.0274307	-0.163288	0.0529141	heterogeneous nuclear ribonucleoprotein 1-like; K14411 RNA-binding protein Musashi (A)	Heterogeneous nuclear ribonucleoprotein 1 OS=Arabidopsis thaliana GN=RNP1 PE=1 SV=1	RNA recognition motif. (a.k.a. RRM, RBD, or RNP domain)
BnaC02T0308500WE	-0.116005	0.0960161	-0.0619754	0.281608	-0.270517	0.0211785	-0.619736	0.0562957	-0.129186	0.0755311	-0.0363668	0.096719	phosphoglycerate kinase, cytosolic-like; K00927 phosphoglycerate kinase [EC:2.7.2.3] (A)	Phosphoglycerate kinase, cytosolic OS=Nicotiana tabacum PE=2 SV=1	Phosphoglycerate kinase
BnaA10T0189800WE	-1.14637	0.149709	0.038306	0.111118	-0.270332	0.0163041	0.0675694	0.250267	0.171363	0.253219	0.240786	0.255843	hypothetical protein; K05527 BolA protein (A)	Protein BOLA4, chloroplastic/mitochondrial OS=Arabidopsis thaliana GN=BOLA4 PE=1 SV=1	BolA-like protein
BnaA07T0279100WE	-0.0102281	0.164037	0.0507299	0.282225	-0.140529	0.0247932	0.0859256	0.0947297	0.0214679	0.360211	-0.146935	0.0136089	cytosolic isocitrate dehydrogenase [NADP]-like; K00031 isocitrate dehydrogenase [EC:1.1.1.42] (A)	Cytosolic isocitrate dehydrogenase [NADP] OS=Arabidopsis thaliana GN=CICDH PE=2 SV=1	Isocitrate/isopropylmalate dehydrogenase
BnaC01T0358000WE	0.226868	0.0949398	-0.292836	0.141868	0.0368391	0.371581	-0.3395	0.0634633	-0.397738	0.0341567	-0.165023	0.207644	--	TSA1-like protein OS=Arabidopsis thaliana GN=NAI2 PE=1 SV=1	TSA1-like protein OS=Arabidopsis thaliana GN=NAI2 PE=1 SV=1
BnaA06T0466300WE	0.048129	0.277514	0.0700487	0.127812	0.187944	0.0450225	-0.43777	0.0813645	0.0400656	0.262124	-0.218155	0.00211818	Os03g0332500; K02866 large subunit ribosomal protein L10e (A)	Acid phosphatase 1 OS=Solanum lycopersicum GN=APS1 PE=2 SV=1	HAD superfamily, subfamily IIIB (Acid phosphatase)
BnaA04T0213400WE	-0.0607003	0.276975	-0.444789	0.0212819	0.267223	0.0279237	-0.106351	0.101278	0.12492	0.330545	0.199963	0.0777764	thioredoxin O1, mitochondrial; K03671 thioredoxin 1 (A)	Thioredoxin O1, mitochondrial OS=Arabidopsis thaliana GN=At2g35010 PE=2 SV=1	Thioredoxin
BnaC01T0021500WE	-0.0766582	0.358138	0.088519	0.0042223	0.298835	0.00420566	0.0311698	0.232796	-0.0192113	0.0291322	0.110741	0.0313381	cyclase-associated protein 1; K17261 adenylyl cyclase-associated protein (A)	Cyclase-associated protein 1 OS=Arabidopsis thaliana GN=CAP1 PE=2 SV=1	Adenylate cyclase associated (CAP) C terminal
BnaA03T0228700WE	-0.198667	0.0115235	-0.498161	0.104914	0.373547	0.117667	0.889015	0.0323585	-0.0876982	0.151804	-0.174773	0.136506	uncharacterized LOC101760823; K17338 receptor expression-enhancing protein 1/2/3/4 (A)	--	EF-hand domain pair	calcium
BnaC01T0059400WE	0.0753276	0.0801593	0.0994254	0.037819	0.461742	0.0128494	-0.126922	0.104406	0.0489544	0.377212	0.00592225	0.337292	villin-4-like; K05768 gelsolin (A)	Villin-4 OS=Arabidopsis thaliana GN=VLN4 PE=1 SV=1	Villin headpiece domain	calcium dependent - Involved in root hair growth through regulating actin organization in a Ca2+-dependent manner.
BnaA03T0358200WE	0.331216	0.176587	0.243944	0.219392	0.630854	0.0404606	-1.16964	0.027048	-0.822105	9.88728e-05	-0.113021	0.19726	disease resistance protein RPM1-like; K13457 disease resistance protein RPM1 (A)	PYK10-binding protein 2 OS=Arabidopsis thaliana GN=PBP2 PE=1 SV=1	Jacalin-like lectin domain	biotic stress	https://www.ncbi.nlm.nih.gov/pmc/articles/PMC5536079/
BnaA05T0410200WE	-0.311079	0.244791	0.527564	0.0259557	0.716036	0.0264597	-0.417367	0.0469554	0.217364	0.234053	0.836103	0.00136821	hypothetical protein; K19891 glucan endo-1,3-beta-glucosidase 1/2/3 [EC:3.2.1.39] (A)	Probable glucan endo-1,3-beta-glucosidase A6 OS=Arabidopsis thaliana GN=A6 PE=2 SV=1	X8 domain
BnaA08T0174500WE	0.491402	0.0454454	-0.35414	0.136415	1.06262	0.00946864	-0.526987	0.0799497	0.0345654	0.323917	-0.154466	0.325022	apoptotic chromatin condensation inducer in the nucleus-like; K12875 apoptotic chromatin condensation inducer in the nucleus (A)	Apoptotic chromatin condensation inducer in the nucleus OS=Homo sapiens GN=ACIN1 PE=1 SV=2	SAP domain
BnaA09T0486800WE	-0.162903	0.313905	-0.330682	0.233062	1.08694	0.032418	-0.51221	0.121152	0.147258	0.125446	-0.150481	0.220423	ferritin-1; K00522 ferritin heavy chain [EC:1.16.3.2] (A)	Ferritin-3, chloroplastic OS=Arabidopsis thaliana GN=FER3 PE=2 SV=1	Ferritin-like domain	coping with stress	https://www.tandfonline.com/doi/pdf/10.1080/01904169609365202#:~:text=The%20iron%2Dstorage%20protein%20ferritin,a%20safe%20and%20bioavailable%20form.
BnaA06T0416400WE	-0.083652	0.381682	-0.956896	0.00323872	1.72277	0.00290546	0.188465	0.358493	-0.541113	0.0626453	0.463264	0.0872501	--	Mavicyanin OS=Cucurbita pepo PE=1 SV=1	Plastocyanin-like domain	they are involved in redox reactions occurring during primary defense responses in plants and/or in lignin formation	https://onlinelibrary.wiley.com/doi/10.1002/pro.5560070907

## Sheet: (D) Common protein group 
Table S8 D. Selected protein groups that are common to our three studies. The numerical values in the columns indicate the number of differentially abudant genes or proteins in the studies. The number inside the bracket indicate increased abundance/decreased abundance, 1-, 4-, -7, -14, and -21 indicates the time points of sampling after pathogen inoculation in three different studies. Transcripto…
Key Proteins	Transcriptome/metabolome (1-, 4-, and 7-DPI)	Proteome/metabolome (1-, 4-, and 7-DPI)	Proteome (7-, 14-, and -21 DPI)
Calcium signalling
Calcium-dependent protein kinase	18 (8/10 in CR/CS line 7 DPI)	21 (14/7 in CR line at 7 DPI)	32 (30/2 in CR Parent line at 21 DPI)
Calmodulin-binding protein
Calcineurin B-like protein
Calcium-binding protein
Calcium transporting ATPase
Calreticulin
Reactive oxygen species (ROS)
Peroxidases	28 (14/14 in CR/CS line 7 DPI)	45 (22/23 in CR line at 7 DPI)	20 (18/2 in CR Parent line at 21 DPI)
Peroxiredoxin-2D
Catalase
Glutathione-S-transferase
Thioredoxin
L-ascorbate oxidase
Superoxide dismutase
Cell wall reinforcement/lignin metabolism
Lignin	16 (6/10 in CR/CS line 7 DPI)	20 (18/2 in CR line at 7 DPI)	24 (21/3 in CR Parent line at 21 DPI)
Laccase
Caffeic acid 3-O-methyltransferase
Lignin-forming anionic peroxidase
Peroxidase -2, -5, -17, -34, -39, -49, -52, -56, -64
Cinnamyl alcohol dehydrogenase 6
S-adenosylmethionine synthase 3
Plant Invertase/PMEI	16 (9/7 in CR/CS line 7 DPI)	7 (7/0 in CR line at 7 DPI)	1 in CR Parent line at 21 DPI) *
General stress response
Glucosinolate	7 (5/2 in CR/CS line 7 DPI)	13 (9/4 in CR line at 7 DPI)	2 in CR Parent line at 21 DPI) *
Dehydrin/granulin	1 in CR/CS line 7 DPI) *	14 (14/0 in CR line at 7 DPI)	12 (7/5 in CR Parent line at 21 DPI)
Resistance genes (TIR, NB-ARC, and LRR)	44 (18/26 in CR/CS line 7 DPI)	23 (21/2 in CR line at 7 DPI)	16 (12/4 in CR Parent line at 21 DPI)
